# Supplementary material for: Multi-omics analyses reveal that the gut microbiome and its metabolites promote milk fat synthesis in Zhongdian yak cows
Source: PeerJ journal article supplement (doi:10.7717/peerj.14444), 2022-12-02

AP383-ZX01-0201-pos-XNL

1: TOF MS ES+  
TIC  
9.88e7

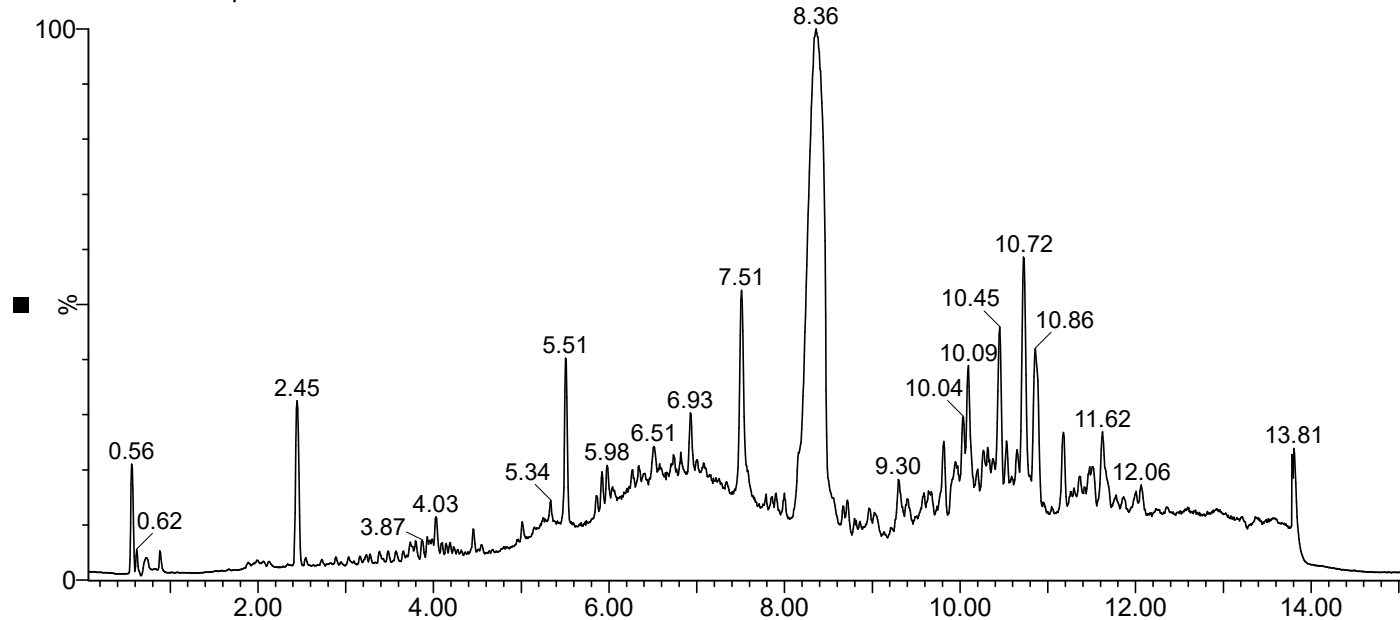

AP383-ZX01-0201-pos-NZ

1: TOF MS ES+  
TIC  
9.66e7

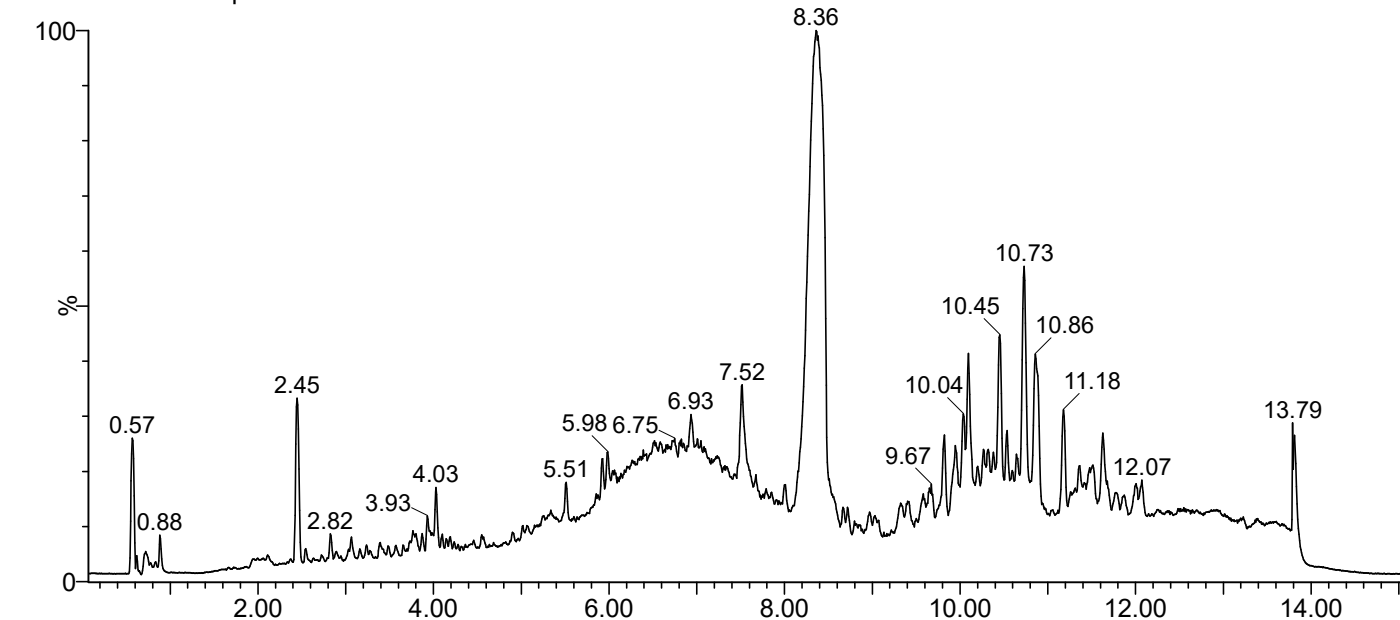

AP383-ZX01-0201-pos-SXPZ

1: TOF MS ES+  
TIC  
1.12e8

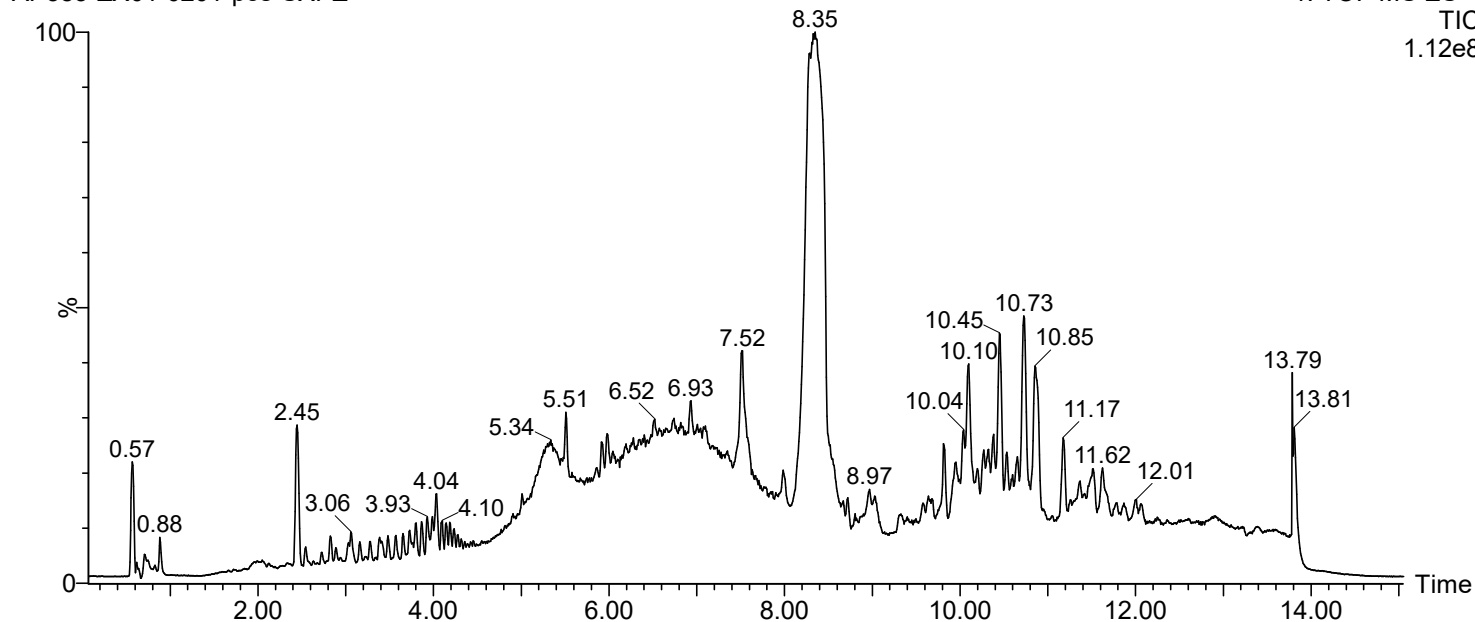

AP383-ZX01-0201-pos-20

1: TOF MS ES+  
TIC  
9.94e7

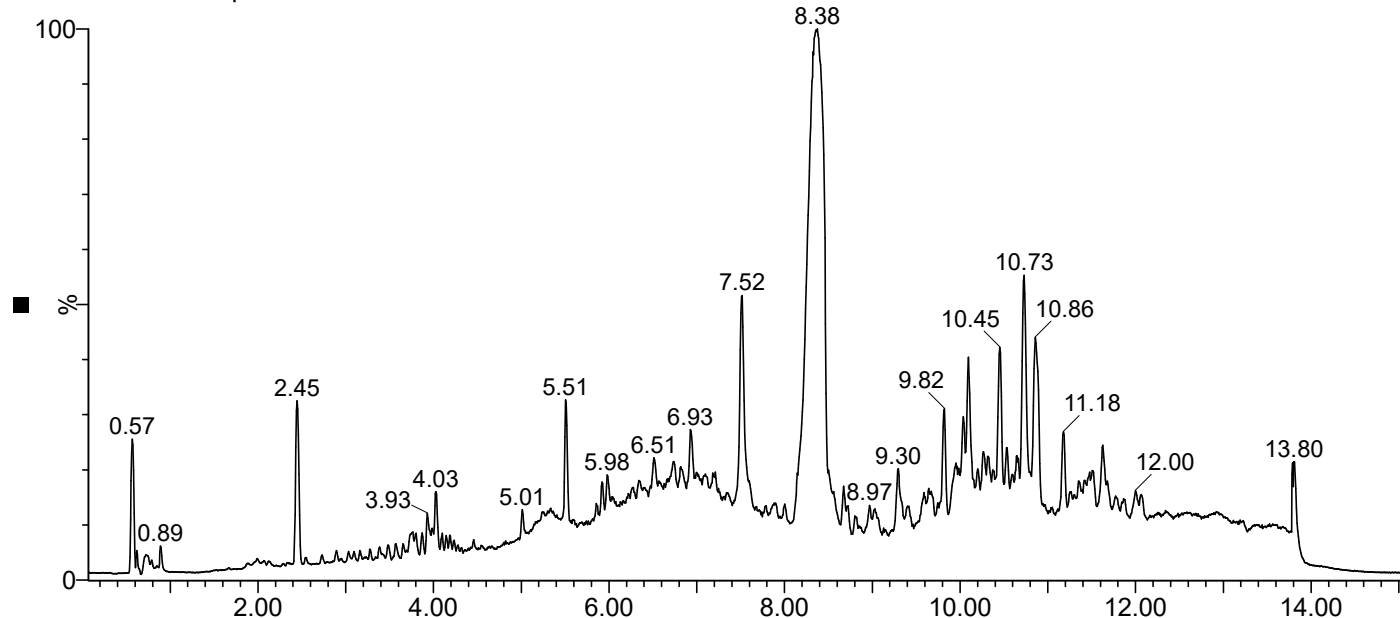

AP383-ZX01-0201-pos-35

1: TOF MS ES+  
TIC  
1.03e8

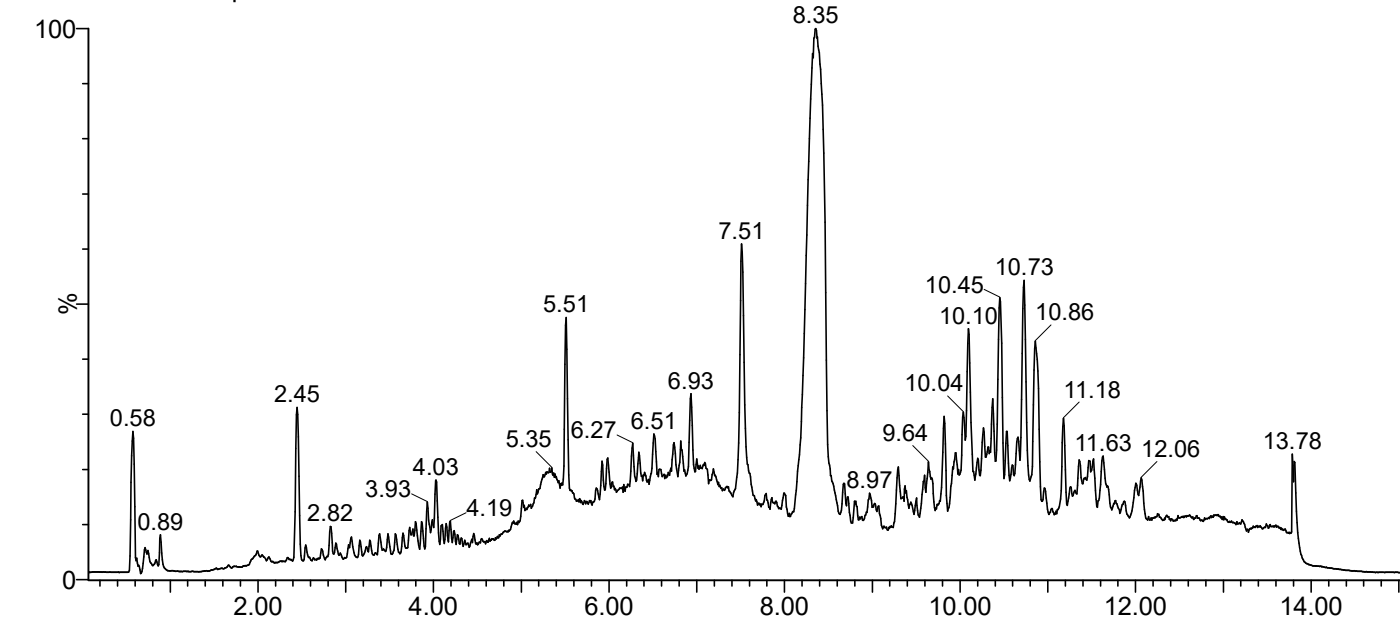

AP383-ZX01-0201-pos-46

1: TOF MS ES+  
TIC  
9.77e7

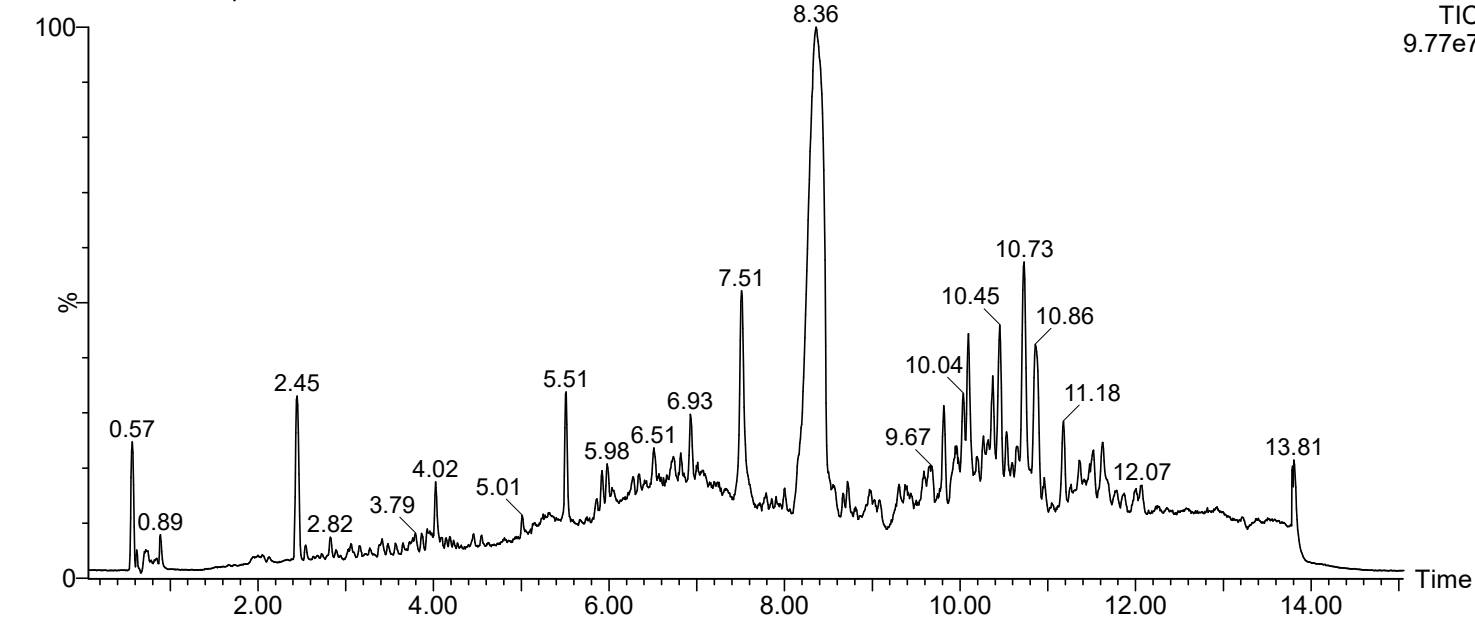

AP383-ZX01-0201-pos-23

1: TOF MS ES+  
TIC  
9.93e7

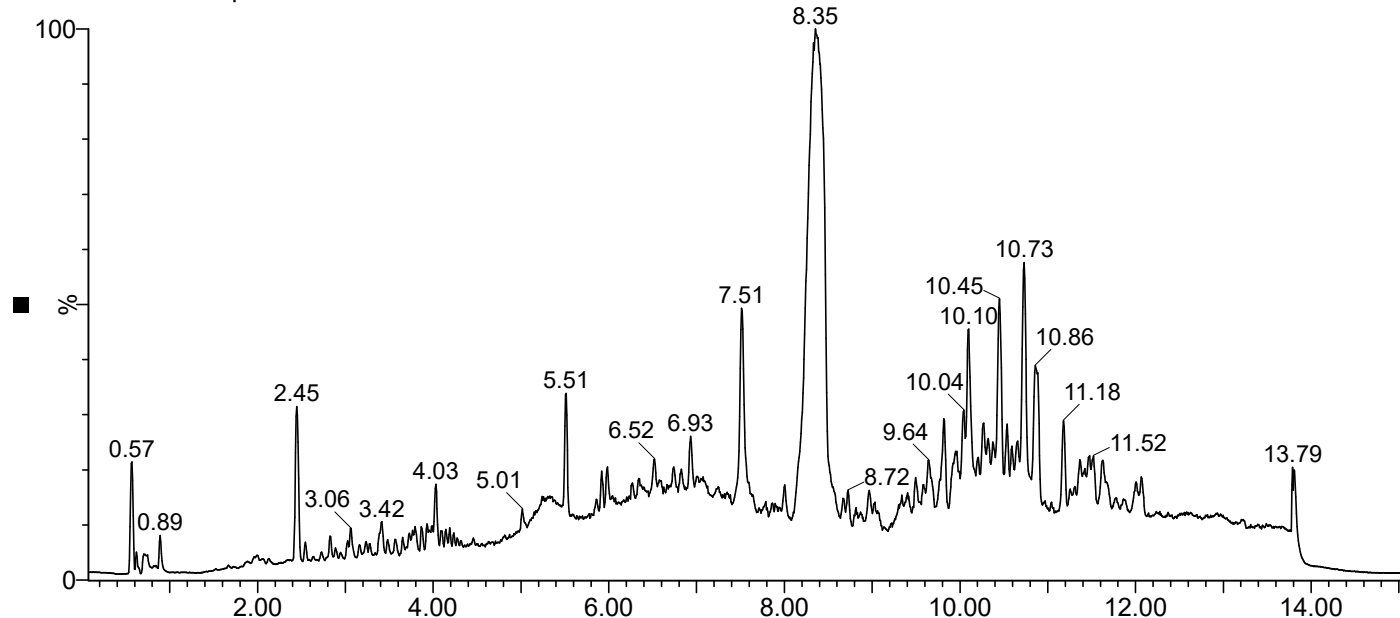

AP383-ZX01-0201-pos-BZ

1: TOF MS ES+  
TIC  
1.00e8

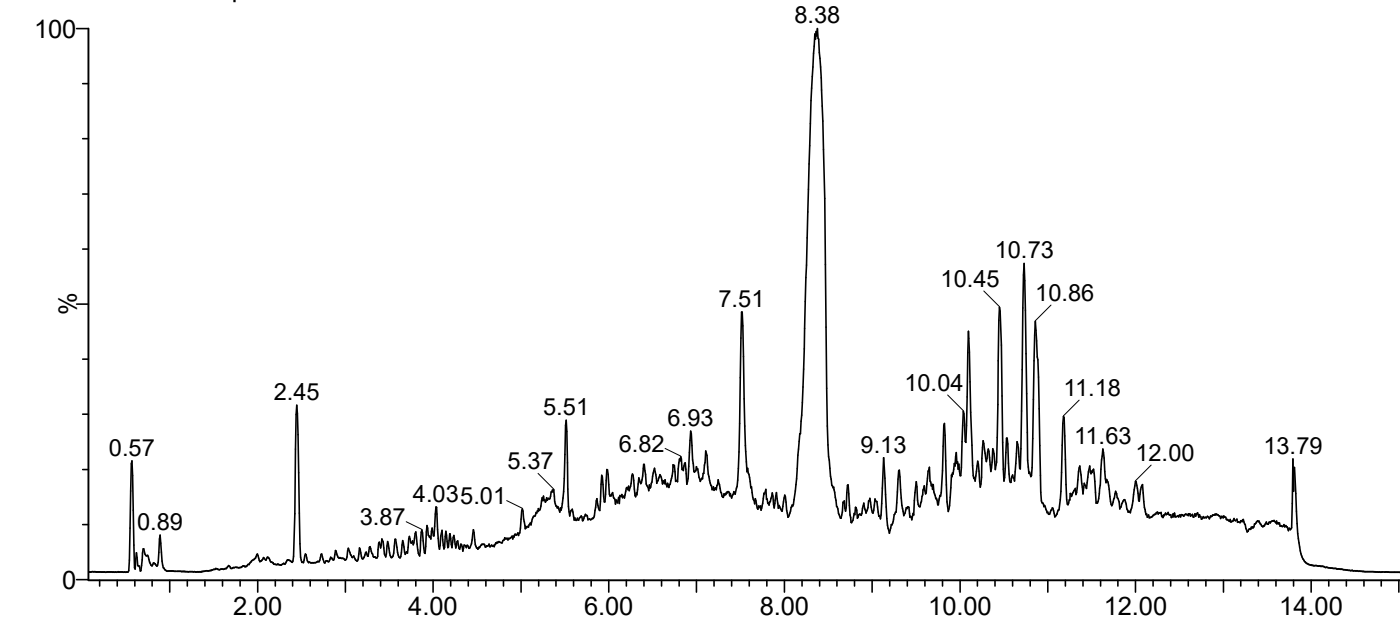

AP383-ZX01-0201-pos-6

1: TOF MS ES+  
TIC  
1.04e8

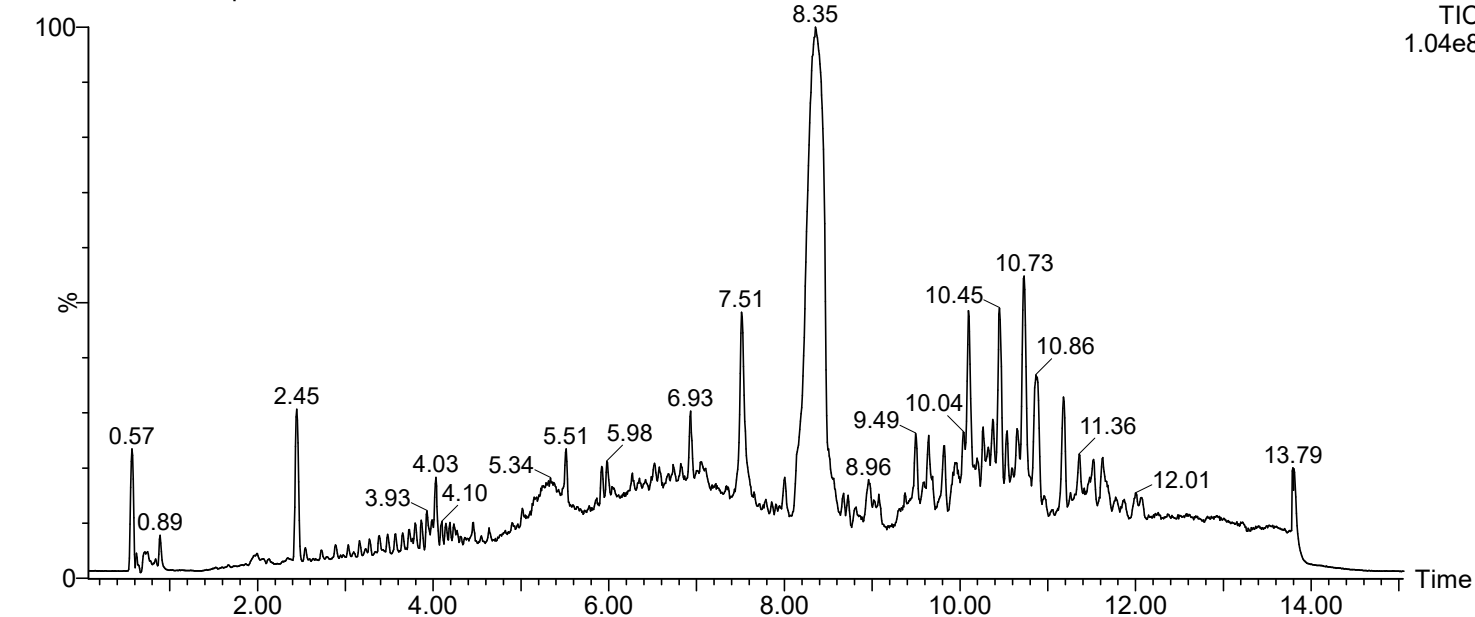

AP383-ZX01-0201-pos-SXPZNZXNL4635

1: TOF MS ES+  
TIC  
9.96e7

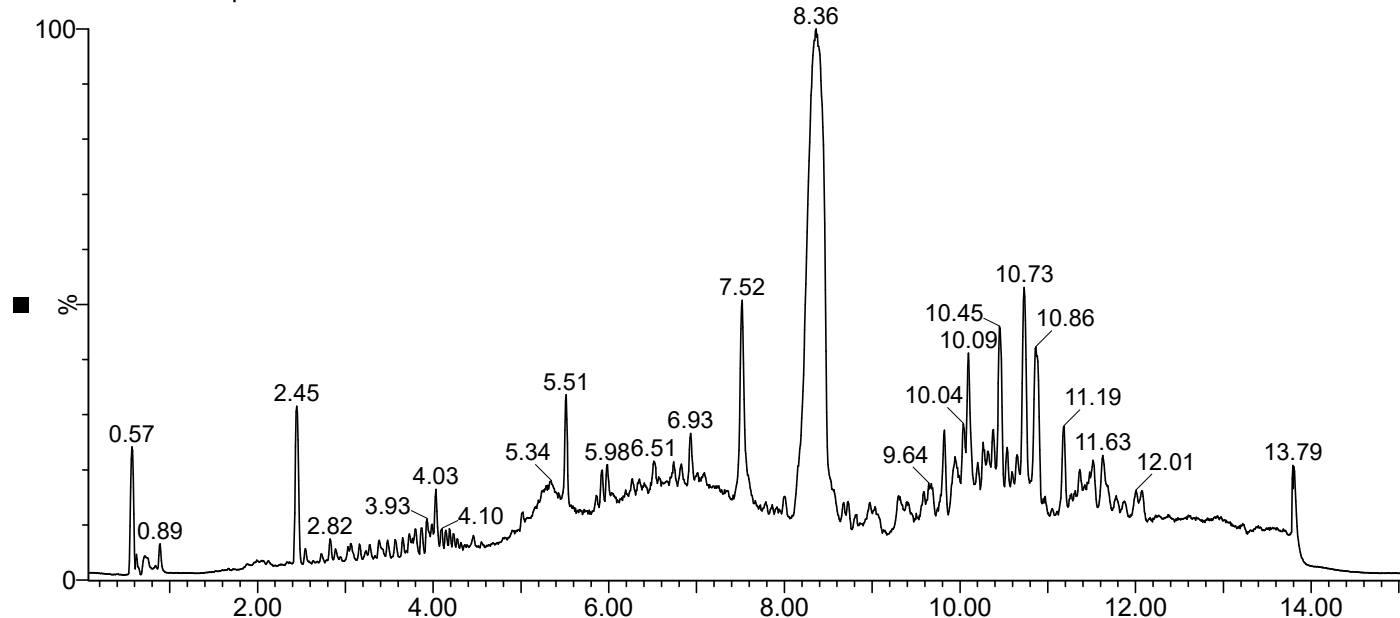

AP383-ZX01-0201-pos-20623BZ

1: TOF MS ES+  
TIC  
9.87e7

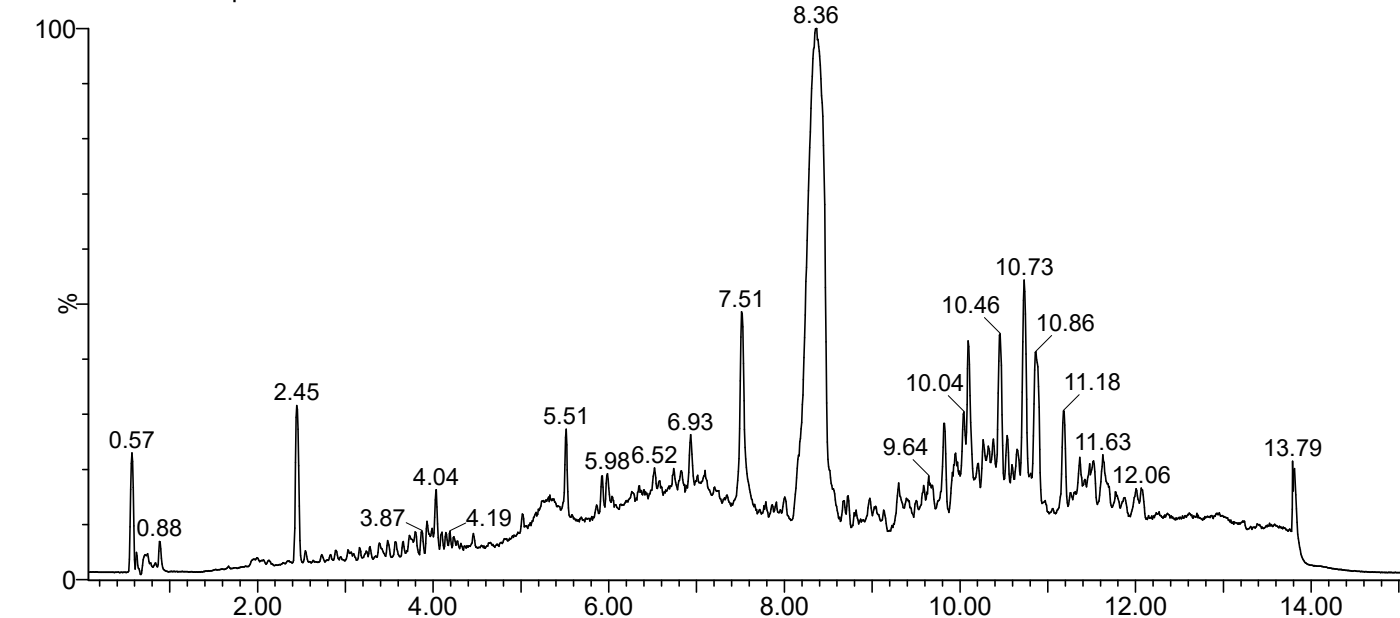

AP383-ZX01-0201-pos-6BZ

1: TOF MS ES+  
TIC  
9.90e7

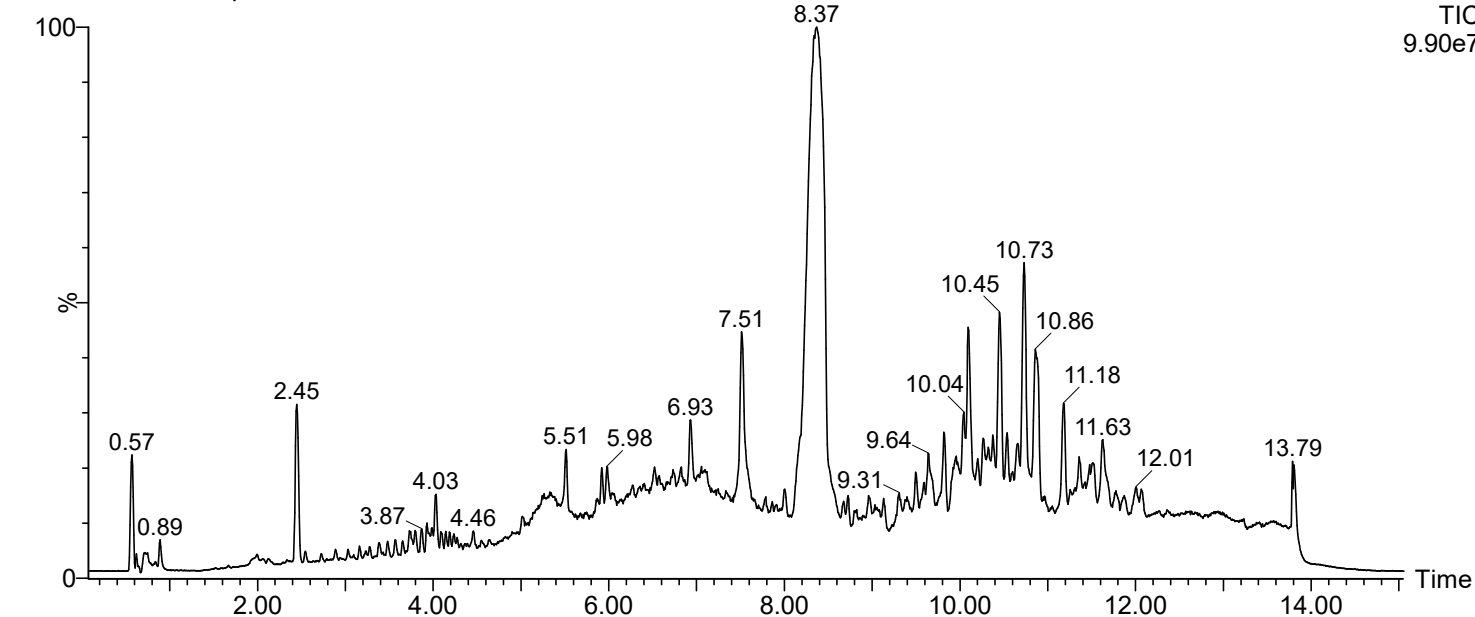

AP383-ZX01-0201-pos-QC-1

1: TOF MS ES+  
TIC  
9.97e7

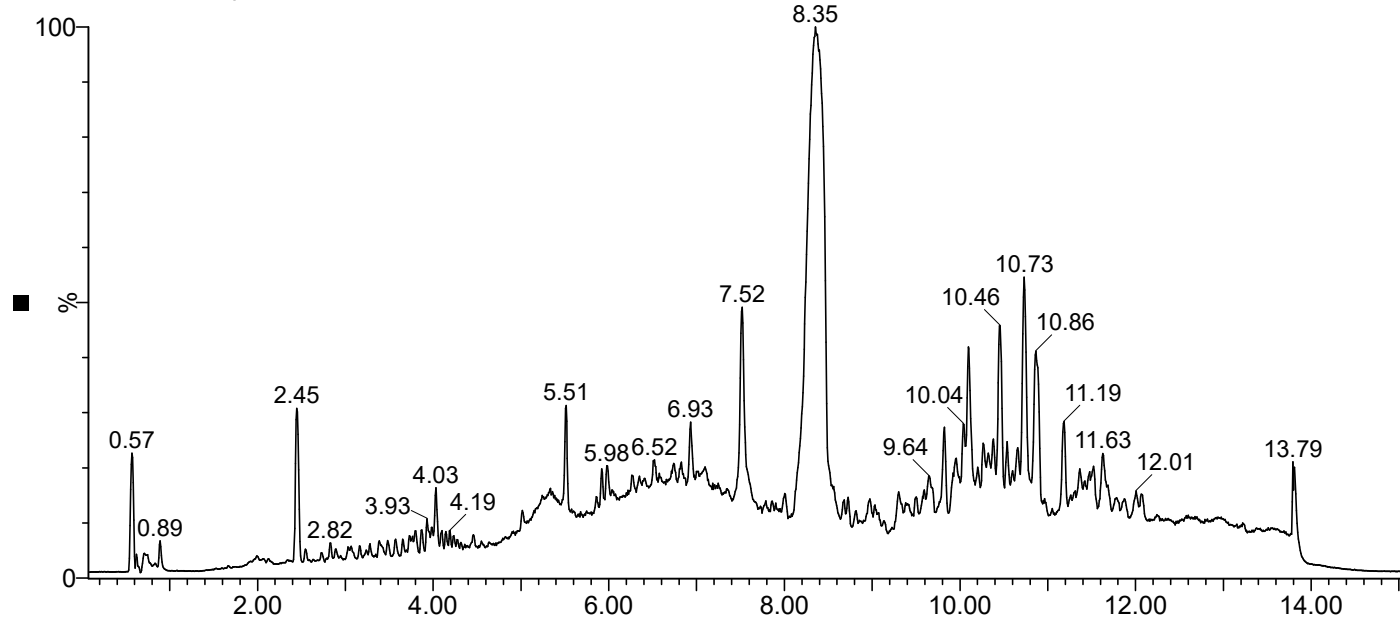

AP383-ZX01-0201-pos-QC-3

1: TOF MS ES+  
TIC  
1.00e8

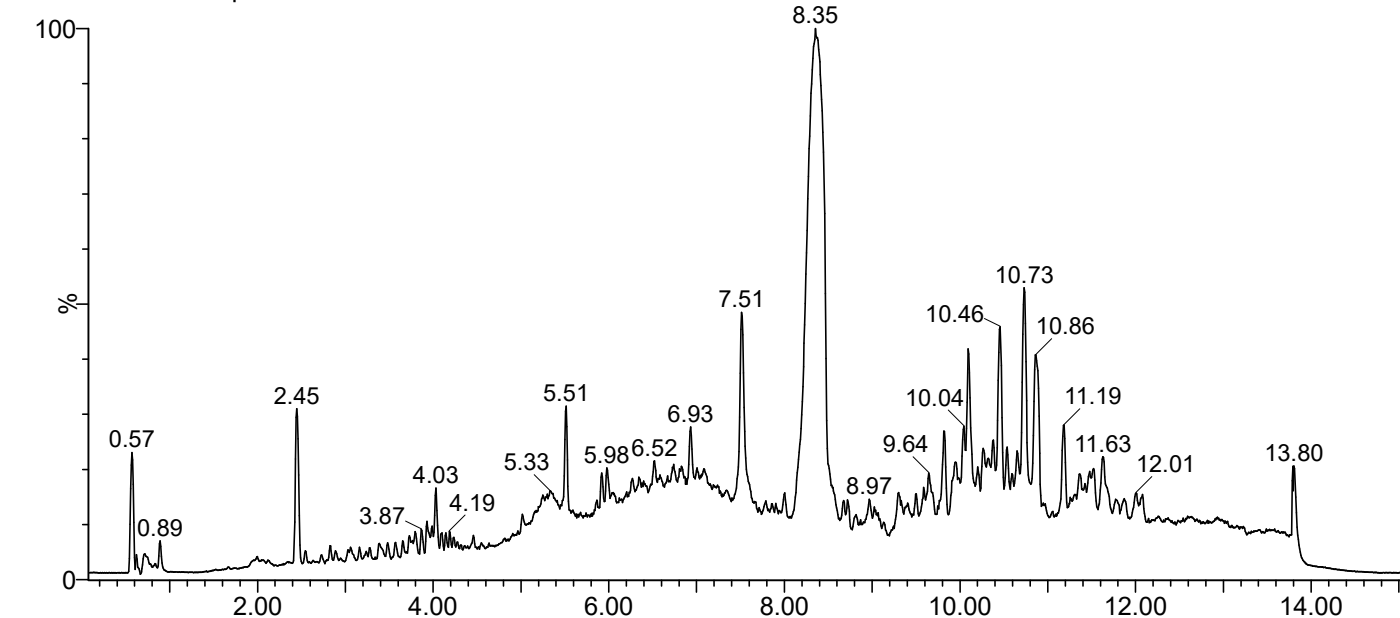

AP383-ZX01-0201-pos-QC-4

1: TOF MS ES+  
TIC  
9.92e7

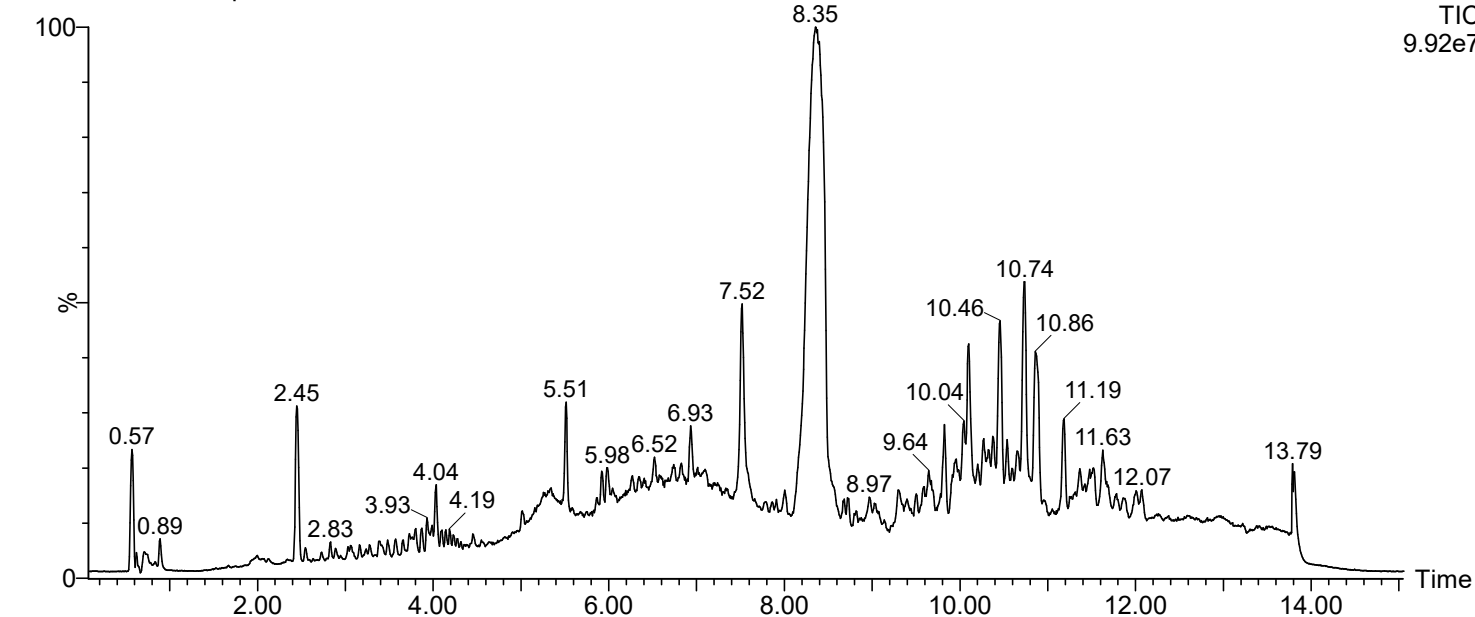

Supplement: biomarker_Web_Report_.zip [file tic-total.pdf › Web_Report/Quality_control/qc_data/tic-total.pdf]
