# Supplementary material for: Multi-omics analyses reveal that the gut microbiome and its metabolites promote milk fat synthesis in Zhongdian yak cows
Source: PeerJ journal article supplement (doi:10.7717/peerj.14444), 2022-12-02
Supplement: biomarker_Web_Report_.zip [file All_cor.xls]

SampleID	H1	H2	H3	H4	H5	H6	L2	L6	L1	L4	L5	L3
H1	1	0.865290535550878	0.781374907091865	0.785834145065881	0.869413019924784	0.911079380601281	0.828568683087045	0.822203718233743	0.80225156630741	0.857911384653624	0.848464438823915	0.768902275725177
H2	0.865290535550878	1	0.829589557714205	0.83684226443238	0.852485887677063	0.894301375574025	0.821713784491348	0.828733004911613	0.850564580539212	0.87580721958771	0.865514194029591	0.778022280277591
H3	0.781374907091865	0.829589557714205	1	0.850474005457387	0.817344468155385	0.894116733929285	0.820323619803731	0.907773900100813	0.87252311768844	0.858298382364411	0.913107509812553	0.894006640632846
H4	0.785834145065881	0.83684226443238	0.850474005457387	1	0.82398623904645	0.889451313204254	0.835072474244982	0.867027144524929	0.843679572630069	0.826579594503713	0.885712901501776	0.816634148323873
H5	0.869413019924784	0.852485887677063	0.817344468155385	0.82398623904645	1	0.917460690040942	0.868919202585806	0.864346846315106	0.855919909212813	0.872194128088791	0.888699095647381	0.801304795859627
H6	0.911079380601281	0.894301375574025	0.894116733929285	0.889451313204254	0.917460690040942	1	0.875095162988298	0.910728932945653	0.882940179434087	0.913053555088694	0.939089082094084	0.856804057606365
L2	0.828568683087045	0.821713784491348	0.820323619803731	0.835072474244982	0.868919202585806	0.875095162988298	1	0.921300197546377	0.863901053849779	0.843733831172232	0.912934575982577	0.796202203056524
L6	0.822203718233743	0.828733004911613	0.907773900100813	0.867027144524929	0.864346846315106	0.910728932945653	0.921300197546377	1	0.886372340713268	0.857415822981174	0.96736606134076	0.911358398070997
L1	0.80225156630741	0.850564580539212	0.87252311768844	0.843679572630069	0.855919909212813	0.882940179434087	0.863901053849779	0.886372340713268	1	0.831234581070535	0.910997922407981	0.835859030865826
L4	0.857911384653624	0.87580721958771	0.858298382364411	0.826579594503713	0.872194128088791	0.913053555088694	0.843733831172232	0.857415822981174	0.831234581070535	1	0.906343444828126	0.811287576641922
L5	0.848464438823915	0.865514194029591	0.913107509812553	0.885712901501776	0.888699095647381	0.939089082094084	0.912934575982577	0.96736606134076	0.910997922407981	0.906343444828126	1	0.904760909692788
L3	0.768902275725177	0.778022280277591	0.894006640632846	0.816634148323873	0.801304795859627	0.856804057606365	0.796202203056524	0.911358398070997	0.835859030865826	0.811287576641922	0.904760909692788	1
