# Supplementary material for: Multi-omics analyses reveal that the gut microbiome and its metabolites promote milk fat synthesis in Zhongdian yak cows
Source: PeerJ journal article supplement (doi:10.7717/peerj.14444), 2022-12-02
Supplement: biomarker_Web_Report_.zip [file All_heatmap.xls]

#ID	H1	H2	H5	L4	L2	H6	L6	L5	H4	L1	H3	L3
pos_2112	1.32740010993957e-05	1.11653423417789e-05	1.6066000712101e-05	7.56416854769425e-06	8.53223733684147e-06	3.70048373195878e-05	5.69912671729702e-06	3.1523010057473e-06	4.73029417582897e-06	4.14195819793085e-06	3.25451690410867e-06	3.5136763396562e-06
pos_2387	1.09136011484554e-05	1.12959557842661e-05	9.16213535400378e-06	8.77101706746228e-06	1.18728230447247e-05	1.30384833657619e-05	1.06399244980393e-05	9.6233471337923e-06	6.59483566313821e-06	1.21943436023697e-05	1.03967455059518e-05	8.28742100465696e-06
pos_2212	2.34334080224384e-05	2.0405945202407e-05	2.30996606653594e-05	1.8313717063101e-05	2.45351018511708e-05	2.64838424482661e-05	2.23092052674788e-05	2.11755265323452e-05	1.65412300936037e-05	2.20819741840235e-05	1.82696832915326e-05	2.10258214602198e-05
pos_2272	2.80496060952016e-05	2.75346010918162e-05	3.02116839517411e-05	2.49075304917241e-05	3.08075342879977e-05	3.49434397215638e-05	2.81012540153978e-05	2.96434275299101e-05	2.5127111756632e-05	3.39336735193507e-05	2.70125798279689e-05	2.74050033330889e-05
pos_19	0.000754628799211186	0.000689185942934045	0.000592356481098528	0.000756055464885327	0.000725419231660012	0.000797793232519584	0.000700631676020376	0.000778064113374993	0.000621720538083001	0.00081862163465382	0.000750556103184053	0.000777630754093582
pos_2234	1.12976907600878e-05	7.05096423883679e-06	5.73416879861459e-06	9.1253846956016e-06	1.15116575906677e-05	9.89307227188635e-06	9.1264135153974e-06	1.00812058859888e-05	6.26184980638616e-06	9.79611225481662e-06	6.0274798754268e-06	9.65517142833155e-06
pos_1819	5.12902784984379e-06	5.58367665666403e-06	1.08445866270275e-05	6.21645734533185e-05	1.89498700718786e-05	8.48429036378211e-05	2.97049131060438e-05	2.40267206198694e-05	1.63724977987577e-05	4.7146383592421e-05	4.43077800120981e-05	1.80857377810863e-05
pos_1963	7.94818670626784e-06	7.92369416589862e-06	1.40505523995177e-05	7.05353257418116e-05	2.16883015786834e-05	0.000100521589164162	3.46292581080434e-05	2.78697592469254e-05	1.98496899204645e-05	5.50550309631967e-05	5.80110019663289e-05	2.10829116876056e-05
pos_1339	2.6737422015098e-05	1.06320367149939e-05	3.67652222287132e-05	0.000124542637431557	5.6437120313746e-05	0.000219668919948046	6.2945311180036e-05	5.17243721510084e-05	2.38207796162021e-05	8.03107635436269e-05	6.12161318031332e-05	3.91435682518875e-05
pos_2349	3.3147722326525e-05	1.25951135571647e-05	4.37920846628552e-05	0.000164488708114983	7.36380367868607e-05	0.000291195468765919	8.25708126733939e-05	6.84009762200424e-05	2.97193657548255e-05	0.000108625501513186	8.82526336963914e-05	5.15755076911009e-05
pos_1568	2.25109964855567e-05	1.24670446242854e-05	3.49026475413875e-05	0.000121003083800439	4.95448376511682e-05	0.000207081889978568	5.22044684628868e-05	4.72761191163586e-05	2.36354871519745e-05	7.83767194189476e-05	6.34210779782219e-05	3.26091882930914e-05
pos_2216	2.19759680310367e-05	1.14925160835313e-05	3.32615308903227e-05	0.000119080124438238	4.90407771670413e-05	0.000207242196686382	5.54177844373486e-05	4.38563273022805e-05	2.21677070424663e-05	8.08912922373971e-05	6.6277052182357e-05	3.45241434739189e-05
pos_2119	4.60541483816281e-05	1.18695224942481e-05	4.52471220948806e-05	0.00014527709803392	7.15583181854285e-05	0.000254856904689883	7.06321372200864e-05	5.96467024307516e-05	2.63692633337974e-05	9.74065981990039e-05	7.16490827691356e-05	4.54543782103048e-05
pos_1353	1.5012588045451e-05	5.27202238242029e-06	2.28837085222071e-05	7.05321040245912e-05	3.70851718160335e-05	0.000132849772580879	3.72435581405282e-05	3.40903751996958e-05	1.45630821490225e-05	4.89439409068876e-05	3.23542116623596e-05	2.57829644613861e-05
pos_2175	1.26571404627091e-05	3.514834352234e-06	1.72888397103832e-05	5.72733810187072e-05	2.89695858965e-05	9.47954471410324e-05	3.11617232354661e-05	2.52259123186743e-05	8.48288866489688e-06	3.7038499506261e-05	2.45826884919968e-05	1.79009581712316e-05
pos_2531	1.20240455763733e-05	2.05117805805916e-06	7.49769914856812e-06	8.53173557836718e-05	8.94337764678185e-06	8.26871048399801e-05	9.13661414860887e-06	7.74135966907602e-06	4.84981382894595e-06	2.6070449155582e-05	3.38125797060265e-05	6.99644344810066e-06
pos_2539	1.14570829089823e-05	0	0	4.05774414400369e-05	5.66888737309304e-08	5.89959489388373e-05	0	1.36416447250283e-08	0	0	0	0
pos_391	4.15262988047571e-06	0	0	1.05104444820377e-05	0	1.62731314395573e-05	0	0	0	0	0	0
pos_1501	0.00190605191067706	0.0013311021915979	0.00148418591938345	0.00160065530332431	0.00172463882022271	0.00222551463266763	0.0015185373805459	0.00215840120028248	0.00199358203114592	0.00173508155807356	0.00155192141578759	0.00143952452784144
pos_2830	2.68136503945575e-05	2.26663162761449e-05	2.16640067046812e-05	2.64958360432013e-05	2.14857013674773e-05	3.22165902487836e-05	2.51010781987797e-05	2.81399892331598e-05	2.64676634481454e-05	2.37241796503673e-05	2.73272731654938e-05	2.5412560070782e-05
pos_1856	0.000238543959102406	0.000252549670350144	0.000175250161613544	0.000188952089138042	0.000231861562041354	0.000204244268074264	0.000232384991348686	0.000206889615463226	0.000185897259181561	0.000210949506964022	0.000201369907420874	0.000184299975882561
pos_382	4.04118419755249e-05	3.79272871486798e-05	1.97494311755154e-05	2.58281230167722e-05	3.39905900249892e-05	3.23583123862912e-05	3.75686793269993e-05	2.38941656500039e-05	2.52745273684022e-05	2.4853475868536e-05	2.6155830852214e-05	2.9539388565994e-05
pos_791	8.94011629656901e-06	8.73984124689404e-06	3.86688665710266e-06	5.58174874767063e-06	9.03801002804621e-06	7.54254342114876e-06	8.53896421998452e-06	5.90410022964088e-06	4.67649903593026e-06	5.74427731773114e-06	5.16949272499164e-06	6.95797497514686e-06
pos_2779	2.59209257354365e-05	2.87778025274585e-05	1.34521917642753e-05	1.67157068799438e-05	2.35710963138596e-05	2.30394713378518e-05	2.95732288091607e-05	2.0547948057455e-05	2.28156300396053e-05	1.60653989024232e-05	2.85263913545012e-05	1.95981603790493e-05
pos_536	1.99917897073106e-05	2.06650851103214e-05	1.17412507340699e-05	1.70357981198678e-05	2.01514791534409e-05	1.98914634217417e-05	2.29726811081407e-05	1.65460749093399e-05	1.94691407026592e-05	1.46014051842312e-05	2.11862575068564e-05	1.73161330653289e-05
pos_2182	0.000113051246716882	0.000128016048495834	9.26659832512142e-05	0.000114330264772113	0.000102562379670151	0.000108699790030088	0.000129110036614428	0.000102646460298155	0.000103479125893857	9.71292766813087e-05	0.000104735723671931	9.84922427550799e-05
pos_879	3.88510394359509e-06	5.35554327523994e-06	2.81976420075477e-06	3.44486479320032e-06	3.50220713693997e-06	4.0687364790989e-06	4.6941530054887e-06	3.40633410265309e-06	3.64694530332491e-06	2.37765153766076e-06	3.76125367219311e-06	4.06805823563371e-06
pos_1874	3.84874219146559e-05	2.98795644263889e-05	2.29437073957809e-05	2.9589022535689e-05	3.32330072672231e-05	3.35272376636528e-05	2.31313664949635e-05	2.53374185079077e-05	2.31391146064446e-05	1.95991335248957e-05	1.68230319433694e-05	3.91024085339217e-05
pos_1362	1.18706276380756e-05	8.38718685838071e-06	6.15727168790657e-06	8.86465961327815e-06	8.1918816201105e-06	7.33849452667918e-06	7.73448638941517e-06	7.60120215440479e-06	8.4194443664096e-06	7.03314019384478e-06	7.12383378181231e-06	1.12771296499337e-05
pos_166	0.00076307701483257	0.000606030855513788	0.000328941823073782	0.000714395733712287	0.00063635478459471	0.000537534741752601	0.000671547527114256	0.000608934902311823	0.000520553562459443	0.000367817996141012	0.000416390005206997	0.000744963611385631
pos_1253	0.000169647263078527	6.25511942467572e-05	2.9482717779923e-05	0.000104016943806432	3.64813264297464e-05	7.45147774621749e-05	3.74842382331219e-05	4.95499027861068e-05	9.55913194388082e-05	4.38547751207406e-05	3.98161215471729e-05	4.27274932208108e-05
pos_2760	0.00016195764801317	0.000140548261416716	0.000108935039944358	0.000136153756599422	0.000119481565541221	0.000138578735213668	0.000118566004777534	0.000120499319797595	0.00013141292521644	0.000103521633512794	0.000116961791503783	0.000111210512498158
pos_489	0.00040742856133622	0.000281832754779845	0.000102938925185397	0.000244705649866969	0.000109793072872156	0.000176798409267162	7.60581520132175e-05	0.000101328542119896	0.000281469358940993	2.75413141744048e-05	4.22091665010311e-05	4.97200827266073e-05
pos_375	0.000195677340198524	0.000125720434885379	8.6900281123637e-05	8.59308028173874e-05	5.47712094406931e-05	0.000136383312035498	8.30628216582262e-05	8.04176241587173e-05	0.000136197273282615	4.88696830581599e-05	9.40998399727389e-05	0.000128650303897588
pos_703	0.00044307572605234	0.000358833612174246	0.000309673929102639	0.000350285058499387	0.000342152383300644	0.000357346057334937	0.000337172055203505	0.00033798092078596	0.00035572829949636	0.000278799314069497	0.000350694515035789	0.000358194673118355
pos_1716	3.80248569577814e-05	3.5827792338234e-05	2.51758806320402e-05	2.81144095345592e-05	2.31967294255918e-05	4.0931276313577e-05	3.11968740110539e-05	3.20947290309215e-05	3.00234487085515e-05	2.32444505552389e-05	1.896351725351e-05	3.42440811760526e-05
pos_1592	6.25832720459067e-05	6.09828200300735e-05	3.96746818633165e-05	5.17871069702495e-05	3.67073210793872e-05	5.83152882311266e-05	4.46022484192763e-05	3.97842748559111e-05	4.56346265759407e-05	3.06009738363214e-05	4.0290737017433e-05	4.75297064523908e-05
pos_404	0.000107866679959699	0.000117557084531025	7.42550690847155e-05	9.25263769741048e-05	7.01005106982675e-05	9.00573402805044e-05	7.80133321028455e-05	8.72855408671192e-05	8.01969514534529e-05	6.26807753675769e-05	7.74188753953171e-05	9.52401084197748e-05
pos_781	5.92347335070572e-06	5.53097665739494e-06	5.40735497006843e-06	6.77093917177701e-06	3.35884721714796e-06	5.7072609423303e-06	3.48963801375799e-06	4.96862877263016e-06	2.67352598164126e-06	4.45524164085112e-06	6.82407609906218e-06	5.27186111740817e-06
pos_899	0.000120622863635643	0.000105742242606993	0.000108552693174143	0.000111740359662299	0.000100447448236507	0.000108747021864812	0.000102358764877486	9.75737285810426e-05	8.78296930916505e-05	9.81379929181328e-05	0.000105362069423325	0.00010632249958201
pos_32	8.51394166529041e-05	6.50961170951931e-05	5.9895689763784e-05	7.03213075291111e-05	5.71138131132841e-05	6.37413965156816e-05	6.11596599510956e-05	6.47294028567253e-05	4.79576467433966e-05	6.02747269551464e-05	7.09271955386828e-05	7.16542450719265e-05
pos_1311	0.000101037532027429	7.77899387493278e-05	7.49816952073128e-05	9.14825177592364e-05	7.35623716034624e-05	7.74804940920492e-05	7.88843704154777e-05	8.00039469143523e-05	5.98753450772786e-05	7.24427231728927e-05	8.70331859208876e-05	8.84863177208163e-05
pos_1462	0.000204872605409028	0.000158115370892441	0.00015021976019087	0.000180031572890826	0.000143068379426793	0.000152839495749657	0.000155916786264633	0.000157909877383695	0.000121565580424783	0.000137483439804246	0.000178145241328375	0.000172132959541439
pos_1686	5.32854898021934e-06	5.07211396991826e-06	4.89957447716534e-06	5.7759079185885e-06	3.71874014091772e-06	4.99698372056481e-06	4.79386122688191e-06	4.66911488136348e-06	4.76678870174779e-06	3.9177818644376e-06	5.68680025615159e-06	3.41161419362915e-06
pos_623	1.49172123598269e-05	1.03721138664145e-05	9.36750223807354e-06	9.74518614486434e-06	4.11952446630867e-06	8.58367090022182e-06	4.66476413930863e-06	4.36548800903753e-06	9.25032064199127e-06	2.60735927526665e-06	1.94641370013245e-06	3.47204797926638e-06
pos_1873	5.37056926179794e-05	3.38183559650815e-05	4.08540143258882e-05	3.93587871638971e-05	1.19121087403973e-05	2.85592028570444e-05	8.63384731051796e-06	1.37538366960678e-05	2.91189895098786e-05	1.01018745243659e-05	6.5089136020914e-06	8.96939489082515e-06
pos_858	3.0999153402892e-05	2.07396230819105e-05	2.50105750543045e-05	2.77717259027639e-05	8.56795831933448e-06	1.6099620938435e-05	7.030734169527e-06	1.02070269765906e-05	2.15901924996577e-05	4.78159293049833e-06	3.83025675699248e-06	5.76065773937593e-06
pos_1485	0.000963368577336913	0.000718579684531306	0.000677079152647821	0.000932277091783391	0.000630690128378299	0.000586276832969409	0.000512212741820121	0.00058931543270564	0.000611554762024493	0.000390623784798205	0.000403209377426308	0.000341436836942071
pos_1036	4.04685467791073e-05	3.31040638736945e-05	2.94162813958151e-05	3.72522925387449e-05	1.98238493376738e-05	2.46818120341552e-05	1.38018582876664e-05	2.12441891596672e-05	2.75704117629626e-05	1.92815349281629e-05	1.04396121130422e-05	1.46318229130821e-05
pos_1812	6.31761511484638e-05	5.44026583913967e-05	3.95302860565324e-05	6.56323039502375e-05	3.02245251531555e-05	4.37797159486178e-05	2.32644487894956e-05	3.43995704570414e-05	3.78082352215316e-05	3.04316996001323e-05	1.64536333754164e-05	2.55070269047271e-05
pos_1225	3.78911852012375e-05	3.55184979874749e-05	2.41401546664236e-05	3.83834962538582e-05	2.23310982261632e-05	2.68081211699761e-05	1.98454065279401e-05	2.4988203840938e-05	3.02066592455512e-05	1.98482433498423e-05	1.63597721319554e-05	1.89258918608982e-05
pos_1730	0.000122160156394738	0.000102783544569331	4.15910803960001e-05	0.000124615243745449	3.93272584337605e-05	5.93546909192091e-05	1.95271151699511e-05	3.13432819544717e-05	7.72639396614687e-05	4.27452819437731e-06	9.36410999714494e-06	6.2556614153961e-06
pos_1746	1.05578862561435e-05	6.63500953523452e-06	2.19922765593095e-06	1.18349003383332e-05	1.00266391267448e-06	4.79706231050792e-06	2.88869275526269e-07	1.69599212347563e-06	4.23725525096492e-06	1.00414105924756e-06	9.44373250376803e-08	9.74691288409544e-07
pos_1814	7.97114844209501e-06	5.29944600299884e-06	1.62208016224712e-06	8.16029984253256e-06	1.21168733167241e-06	2.20523172335332e-06	0	2.87034654307352e-07	4.06620153865435e-06	0	0	0
pos_1689	0.000113328607360694	7.22194685705657e-05	3.97395830252954e-05	7.63255723457371e-05	1.18126750348717e-05	4.54513255765654e-05	1.81660439951603e-05	2.84470157921794e-05	1.5824099079707e-05	1.32601589896243e-05	3.60631308419172e-05	2.37498069802743e-05
pos_361	5.84870000024551e-06	3.92137865295844e-06	2.26232518457385e-06	6.11891006451638e-06	2.55542860392774e-07	3.01274323122303e-06	3.47849836977254e-07	1.04009587275734e-06	4.04828858199333e-07	2.52374190654552e-07	1.79814633244854e-06	3.14666396177676e-07
pos_837	0.000685355832246262	0.000612263112456943	0.000170236561432734	0.000914218880778395	0.000190234044319468	0.000378883350886824	0.000184008997476186	0.000350884142389945	0.000378686743209057	0.000277743581291956	0.000195608683929505	0.000218347835682219
pos_933	1.04790384356864e-05	7.91279872432221e-06	1.25636441078707e-06	1.11621361882206e-05	7.40212773154008e-07	1.44905794639597e-06	9.40799824856652e-07	3.23753838591732e-06	5.91670252506796e-06	7.80820913919065e-07	7.50564737906774e-07	3.40907218290434e-06
pos_2461	8.79419200681525e-05	6.01422363386559e-05	4.39011433353771e-05	5.99602725398654e-05	5.47672378241363e-05	5.76621498332308e-05	6.83813827449343e-05	5.34146923873687e-05	5.22469227240212e-05	5.49796190916125e-05	5.96240067770599e-05	5.91969189937421e-05
pos_660	3.31569606701791e-05	2.78873193101446e-05	2.36061905750624e-05	2.85152611403015e-05	2.69214809816126e-05	2.76099711029694e-05	3.0259597945697e-05	2.64646312890733e-05	2.54810840070789e-05	2.37402766475948e-05	2.91930370799155e-05	2.80836848999902e-05
pos_1533	0.00048262597899549	0.000339142988314339	0.000209684071745277	0.0003118878298957	0.0002287505065789	0.0002853378994442	0.000291480058073916	0.00028909076973166	0.000276775834023216	0.000255296709285971	0.000365537662556899	0.000320231468753871
pos_2632	0.000242736553716839	0.000127993613486279	6.77917509716125e-05	0.000139143853087296	1.83558258379618e-05	7.63366805058419e-05	6.21630219195337e-05	8.70005511265065e-05	4.59707180048228e-05	3.35508961242796e-05	0.000206757574330761	9.73691241617493e-05
pos_1067	0.000226223369723558	0.000147065998330439	0.000132917657056432	0.000119848894970489	0.000148426391208315	0.000126000240511002	0.000125265946560295	0.000121700280385796	0.000136042311992654	0.00013004756865257	0.000147966099856976	0.000123066284109277
pos_2846	0.000321759256780673	0.000235965604281949	0.000198245248509717	0.000192434798420396	0.000211664476029677	0.000199289714692852	0.000205001407854034	0.000189351268446962	0.000203611333088064	0.000193426213758076	0.00021235629434014	0.000212018360593539
pos_2480	1.87980030276452e-05	6.28065889756083e-06	2.75253011050685e-06	1.14960229550314e-06	6.94858583452415e-06	3.58959796033381e-06	0	2.08162950726451e-06	0	4.34526861826475e-06	3.61878785198666e-06	8.25922817114535e-07
pos_1611	9.57141780985631e-06	2.51218084335653e-06	2.01588530738649e-06	0	2.35385674181386e-06	2.11610292482058e-06	0	1.95313377470013e-06	1.186131088711e-06	0	1.43977612697394e-06	5.23493790777615e-07
pos_1153	2.18528060986624e-05	5.45436881692451e-06	1.64633062837045e-06	0	4.04306628669005e-06	5.05294929951965e-06	1.1735699118844e-06	0	2.90987740056424e-07	0	0	0
pos_1470	1.6414578379195e-05	3.34050094705181e-06	2.13275026856456e-06	1.46412049644e-06	3.98128342641029e-06	2.8342229877929e-06	8.63017722765214e-07	1.33541450169905e-06	9.63116209112822e-07	1.8263074557716e-06	2.61887049408084e-06	2.08190489620223e-06
pos_1866	3.48805519089673e-05	7.36515745014983e-06	1.24038208235677e-05	2.9531056483882e-06	2.82425675287365e-06	1.44031629532757e-05	5.65700513800528e-06	8.08796722486222e-06	3.51491826280872e-06	3.20677413021196e-06	8.58274188024672e-06	5.79598025086132e-06
pos_2452	5.95479017811488e-05	1.16823883827063e-05	2.12781192678533e-05	4.96438049610751e-06	1.65711667301303e-06	1.03895390670114e-05	5.01753910285891e-07	9.97357002489492e-07	2.65057029695509e-06	8.8516445590414e-07	1.14208114410881e-06	3.76100295139489e-07
pos_2225	0.00020407960418521	7.81092517688013e-05	8.37502191307909e-05	6.99877493612297e-05	7.49422882062228e-05	8.35974757270525e-05	6.92946539192296e-05	7.12005841110326e-05	6.94810868243843e-05	9.10841071240559e-05	6.55696236600296e-05	6.37041911108565e-05
pos_49	0.000379297799948573	0.000115997791864654	8.09076624171076e-05	9.52219417846427e-05	8.42604947561701e-05	7.48142815425405e-05	7.97223143303768e-05	7.80474700807311e-05	9.19128026976478e-05	9.55868353972665e-05	6.59845735366147e-05	7.03440679767848e-05
pos_2104	0.000380364699509173	0.000147629072356375	0.000130343750809167	0.000113894080404048	0.000138132260975826	0.000122689282348747	0.000120704903405166	0.000120965108953552	0.000124630132984311	0.000119376739041164	0.000146337508012642	0.000126627287157454
pos_1045	7.3054960651191e-05	1.50242949698664e-06	8.75992347225844e-07	1.37294654883651e-06	5.86106733992646e-07	5.99732268142455e-07	1.11809097899302e-06	7.36162590950042e-07	2.23022790559257e-07	3.9710502329982e-07	1.44831518902254e-07	1.56562794991941e-07
pos_1441	3.67945462582968e-05	1.45047963159538e-06	1.85200085552307e-08	5.8290464824084e-07	7.06569193340622e-07	3.57192277937502e-07	1.39613412817037e-06	7.87917344586548e-07	1.61094540375955e-06	3.06414344504459e-07	1.29971125837907e-06	4.87147863099091e-07
pos_1965	3.1062193514061e-05	6.12582282859952e-09	0	3.85462702654363e-08	8.81421898296672e-09	0	0	0	2.95711144139477e-09	0	0	7.08070511695076e-06
pos_2598	1.00065925609953e-05	0	7.55312121157693e-07	1.56006829390701e-06	0	1.03764683334986e-06	8.21107638895384e-07	7.47095257542791e-07	9.78341040225147e-07	1.26803010022503e-06	1.39885106579711e-06	8.87440422856187e-07
pos_2241	1.10247638215202e-05	3.81821147617669e-06	1.02164107317029e-06	3.67609137819528e-06	5.75900625476984e-07	2.50603158906447e-06	2.77650192193473e-06	7.33280619243242e-06	0	7.30837980509104e-08	1.11862847114496e-06	0
pos_2682	0.000314637145955568	0.000210318021447846	0.000200878103299634	0.000194407485916059	0.000226831081401648	0.0002190983089848	0.000220218785068824	0.000203451193219657	0.000168513479029225	0.000217065656852394	0.000194268113308641	0.000209418787965723
pos_481	2.20921508491378e-05	1.30719565998463e-05	1.32512968785743e-05	1.24753901328296e-05	1.48059113448261e-05	1.44184592007675e-05	1.36516576967209e-05	1.32165151322896e-05	1.07628836486115e-05	1.41948422696337e-05	1.28423693304222e-05	1.37162260457085e-05
pos_2406	0.00010446950010812	5.66198303312269e-05	5.64403830866036e-05	5.53434062843376e-05	6.68642823816414e-05	6.67103980964479e-05	5.93952781755706e-05	5.4086177421034e-05	4.51193897593529e-05	5.90587134688033e-05	4.96254067634599e-05	5.87351524612905e-05
pos_1864	0.000477851443701027	0.000292116754349483	0.00029247581345377	0.000295850628928937	0.000337392064467322	0.000332341130110216	0.000324297898022127	0.000308112283681169	0.000262013726027366	0.000323359637407932	0.000287848421160282	0.000297290257072991
pos_2797	0.000432214181345245	0.000273533088934704	0.000260609488007427	0.000263042303832377	0.00030896899824524	0.000299509073264358	0.00028556554213307	0.000275881544251542	0.000247548387183039	0.000295091605187336	0.000260145684946738	0.00027769653040449
pos_1604	0.000244067663619478	0.000174504920762197	0.000164376700427672	0.000159974316871194	0.00018143630882601	0.000181871357062615	0.000172779290581625	0.000175905902776867	0.000147840718654545	0.000178730486502056	0.000162110767413334	0.000168012748777542
pos_1507	0.00155526959894682	0.0010007284200908	0.000998366486985496	0.000922293938309687	0.00105164158006616	0.00108399403860617	0.000986421926605423	0.000992944075499502	0.000848539298201163	0.00104540165468193	0.000911204910713631	0.000930611546941604
pos_1657	0.000401397362036678	0.000254520483641941	0.000253511225179201	0.000236918093424841	0.000276523317943342	0.000279996516761332	0.0002580631357844	0.000256918566116986	0.000210471899698022	0.000263579714874825	0.000236081385440137	0.000246662623981176
pos_1425	0.000895887155734537	0.000484960962334095	0.000440777250460541	0.000435278333814951	0.000524976442294909	0.000507367032503551	0.000488777860998454	0.000460005126719515	0.000382482872206491	0.000475527515127428	0.00042730325305655	0.00046052840491012
pos_2072	0.000134245745661704	7.60561974607633e-05	6.97901332218781e-05	7.13422152434155e-05	8.44759326122005e-05	8.1865584220027e-05	7.85891970573894e-05	7.54112213630034e-05	6.18404364509905e-05	7.47131148330781e-05	6.6133508659902e-05	7.40018224549368e-05
pos_1787	0.00100526683187332	0.000614086804970598	0.000553186864046073	0.000542606022091618	0.000609372885423717	0.000640476078125512	0.000597960540329256	0.000582330593401447	0.000525245654618866	0.000610007789450364	0.000530234195210695	0.000600874396306345
pos_970	0.000610723288716618	0.000382848791285527	0.000364775719290852	0.000351879540815996	0.000398815624746096	0.000408126272031427	0.000394041730671781	0.000382712774990027	0.000329831158685696	0.000385236584229087	0.000367569528766819	0.000382246563090133
pos_1107	0.000417252134260373	0.000285253272032136	0.000263878477496856	0.000269369118546198	0.000302364826527774	0.000282729788503351	0.000290480453869925	0.000276866804161708	0.000241455495777314	0.000282091505160416	0.000273654475579724	0.000293018987018842
pos_165	0.000353011038432772	0.000256361877136096	0.000239781989303339	0.000247255884769618	0.0002575588917472	0.000248740563352113	0.000250701871704514	0.000249128818532192	0.000215938648237596	0.000255878978663856	0.000247308818224101	0.000250397201886985
pos_2367	0.00135780036812065	0.00083404755449229	0.000793655567246409	0.000755348700688269	0.000870646490533344	0.000845499094161949	0.000878298840333095	0.000811305023031306	0.000696988703729157	0.000885022992124957	0.000829082805634884	0.000772183040592241
pos_1838	0.000219076987837851	0.000118719522161429	0.000111273660569086	0.000107210330936086	0.00011650868068699	0.000116465936873307	0.000113397848866988	0.000114426456602728	9.43258947899731e-05	0.000115886153382838	0.000110821579474404	0.000111576610825224
pos_2417	0.00128748432436443	0.000708915314438539	0.000649980817113767	0.000660152258322872	0.000727590317560905	0.000702524103824013	0.000702559202184105	0.000717017688463927	0.000566656004453609	0.000690474507631154	0.000668760828074267	0.000670554452847568
pos_1593	0.00358197465816406	0.00206570760671435	0.00194893987871906	0.00180430118109081	0.0021192676902532	0.00198369739311698	0.00193471938099015	0.00187766596805002	0.00168230169400267	0.00202101024305674	0.00195240461451631	0.00190392706219286
pos_2383	0.00139079631537972	0.000852563326016087	0.000778114138578578	0.000775952436173985	0.000858400604162433	0.000798869526314543	0.000817564325589787	0.00077000941018699	0.000684649289127126	0.000803146426334236	0.000772423297552756	0.000753761910546719
pos_2834	0.000683168862796821	0.000371917673725052	0.000372501057526381	0.000347962656716343	0.000417012791866833	0.000398434271017866	0.000377554942969083	0.000375509268407022	0.000303592089059952	0.000394993886307255	0.000350107188128648	0.000376426023897228
pos_341	0.00036502369672636	0.000238334217484536	0.000236559429662607	0.000226118329519591	0.00025202609875931	0.000244143394629588	0.000236844467021555	0.000235474468743734	0.000202625915645116	0.000246989268472235	0.000226191861858413	0.00023496512064823
pos_1632	0.0196621530718676	0.012081738598319	0.0117196476801887	0.0111396672651146	0.0126860163558693	0.0126345106777243	0.0119041124200605	0.0119575395698322	0.0102584370355734	0.0124022990613122	0.011386381577055	0.0115861200037584
pos_202	0.00265326099739824	0.00167297401494058	0.00162748348332676	0.00155223564530884	0.00172208101775902	0.00170472176115386	0.00164520087900293	0.00164279425997184	0.00139781050747059	0.0017162752350363	0.00162502085943215	0.0016050780202879
pos_2186	0.000389979825150108	0.000206514373239962	0.000209707539311342	0.000193476700771311	0.000231942555227543	0.000223106377507456	0.000212395828995147	0.000206835659070127	0.000179189403658512	0.00021877130146365	0.000194777469916308	0.000207152643515563
pos_2728	0.000884030850305768	0.000453274128850688	0.000439038225088093	0.000410107903503359	0.000498996411442122	0.000470777385045281	0.000449785354371935	0.000441489412540393	0.000379295776847445	0.00045275372623239	0.000412577834894319	0.000423258021304381
pos_1383	0.00252282694360387	0.00135399977874569	0.00136494687467216	0.00128968349326358	0.00143685247714904	0.00141317538142883	0.00134027670508201	0.00136422772813082	0.00111134664783451	0.0014574985080816	0.00125615210114881	0.00129998999729388
pos_1806	0.000385184996734078	0.000205491738336921	0.000199023448920674	0.000194113281129144	0.000213846347513485	0.000217081361684951	0.000201724522861855	0.000209030980710837	0.000176211655272923	0.000210450664504938	0.000191353502412688	0.000193628631024685
pos_2010	0.000541679199317333	0.000419247097605632	0.000389418728579676	0.000401290860921256	0.000426918180553118	0.000442149189368709	0.000437036925292565	0.000417697040167076	0.000374539498351348	0.00043489688946689	0.000394047911983409	0.000379841644375872
pos_2506	0.000337313028391849	0.000252083173296131	0.000217334016130527	0.000221440599107128	0.000249758156314654	0.000256828316860786	0.000249777180330849	0.000241777059431734	0.000219148106023012	0.000252828468021193	0.000230227047743043	0.000238818042334455
pos_1624	0.000149029000104752	0.000111748707320662	9.57083184583631e-05	9.71058335463032e-05	0.000109706340186989	0.000110043152610107	0.000106034933128472	0.000104337588335263	8.94228996275647e-05	0.000110171355698059	9.76676222075067e-05	0.000101840377035803
pos_2716	0.000723911467671707	0.000519942693955422	0.000409132808718183	0.000450219111435768	0.000505340258801171	0.000505253155317993	0.00050295078539047	0.000476866096948965	0.000403761048010607	0.000498915730786082	0.000456716957463282	0.000469779702373455
pos_1003	0.00026366640565466	0.000202893278554169	0.000181821552691564	0.000182802184655176	0.000208573667764698	0.000196281611761064	0.000196480787650124	0.000190343364900372	0.000173868741781195	0.00020561505916938	0.000180401894400444	0.000193710422490535
pos_445	0.000500507115779313	0.000389205266814471	0.000357585800548605	0.000361923562751139	0.000399372994338443	0.000382836986178755	0.000385698045176769	0.000377035608114666	0.000332665022801012	0.000391904983089368	0.000367597736812039	0.000379241531299277
pos_2048	0.000397284408812373	0.000296974801030976	0.00026320846443042	0.000262252103396705	0.000276731456151558	0.000287068102260913	0.000270188173243888	0.000275627565678736	0.000242889971500627	0.000294305713653249	0.000281220794344958	0.000269548637580357
pos_2136	0.00149176296927288	0.00122360750462854	0.00106241876469368	0.00108751978699645	0.00114338858684588	0.00119933166155741	0.00114479216800429	0.00115662049119823	0.00102307049177474	0.00121192520456339	0.00111460878140196	0.00113197224637593
pos_331	0.00040987633942936	0.000329833051640469	0.000292610885293011	0.000294387000965571	0.000325669130671682	0.000329467556581558	0.000310476579150677	0.000321357526322382	0.000269751649485571	0.000332051070646799	0.000305744263509701	0.000309440833195217
pos_20	4.71468057745086e-05	4.14959096363205e-05	3.24155842812871e-05	3.71638593499063e-05	3.96612497992118e-05	3.60235708304138e-05	3.79862932494564e-05	3.62384394427455e-05	3.43492284790783e-05	3.62471932942054e-05	3.66888700120988e-05	3.48306273791625e-05
pos_1132	7.03650421149509e-05	4.80698628523893e-05	4.41580164442006e-05	4.8504777301827e-05	4.69726648132722e-05	4.56949921851893e-05	4.84396873837109e-05	4.65408309641998e-05	4.42589598145811e-05	4.66904538360203e-05	4.24548342221493e-05	4.71565564362917e-05
pos_2616	0.00010091059135145	6.93604044477036e-05	5.06473479145007e-05	6.27665577714981e-05	6.15671414706596e-05	6.13558132882948e-05	6.33446259764978e-05	6.27516243531895e-05	5.09268930373526e-05	5.9589805777903e-05	5.22373901535393e-05	6.08820294514038e-05
pos_2543	0.000425908069764086	0.000307544283970919	0.000194787366508952	0.000236592966188242	0.000265015086484378	0.000284666560752313	0.0002700742193403	0.000252111463501331	0.000270129421887008	0.000254767642251191	0.00023882159085169	0.000252398241617323
pos_2559	0.000544727638976925	0.000380128300014322	0.000313142366106549	0.00033378698715755	0.000380705457793481	0.000398680962692749	0.000367782031814779	0.000352166151869275	0.000359389371107796	0.000364558027011601	0.00031578320501969	0.000368346070772485
pos_2168	4.92150810108328e-05	4.08927922459094e-05	3.80517288555936e-05	3.66837163292636e-05	3.68827956742993e-05	2.94889343226261e-05	3.94899839905375e-05	3.74861986097685e-05	2.57684187346281e-05	3.68605809548253e-05	3.79487015848523e-05	4.12076585185785e-05
pos_1116	0.000338852021423393	0.00020383752304253	0.000250177229786744	0.000239097655305419	0.000219284538445175	0.000195395653190675	0.000302765803733405	0.000178564972444387	0.000207759096788693	0.000199569601447179	0.000205733896018339	0.000225494797609368
pos_2422	2.95903138831715e-05	2.06694889342525e-05	2.01485194598694e-05	2.11184711414607e-05	2.12000752205269e-05	2.03710931770755e-05	2.45460785660811e-05	1.91268046065604e-05	1.831990667644e-05	1.78474280027175e-05	2.1731514321488e-05	1.91512191365454e-05
pos_1861	1.91343086496616e-05	1.58963837871072e-05	3.60979011439667e-06	1.97813556556714e-06	5.10480013278946e-06	3.09993471116805e-06	4.77580828205097e-06	2.08182361169291e-06	1.9927297555419e-06	2.19311903681972e-06	3.92105184237952e-06	1.23450433978481e-06
pos_2664	2.38167027049076e-05	1.84398491374838e-05	2.98101209907358e-06	1.8296156691307e-06	5.29651371832441e-06	2.21718040301903e-06	4.67477487619647e-06	7.07684388219868e-06	2.01574251242166e-06	2.9259513437649e-06	7.08022021074028e-06	7.82092913566065e-07
pos_1471	1.46438064256234e-05	1.08812060232341e-05	3.41974589289367e-06	1.4030555041018e-06	2.30368107020059e-06	3.09327903662634e-06	9.37266104570808e-07	7.74752185056753e-07	1.00327875855826e-06	2.46102018806218e-06	1.30996860034014e-06	1.73466085655507e-06
pos_2320	0.000289151133729743	0.0002685567943576	0.000193020256044242	0.000160692092536862	0.000183115880772781	0.000193422538263953	0.00015830030445088	0.00017553021948364	0.0001524153353336	0.000174826871935417	0.000192845595783422	0.000172285996347244
pos_1736	1.76025123661979e-05	1.96745516466281e-05	4.35777363985879e-06	3.7392416590155e-06	5.12802522900038e-06	5.04821930572054e-06	4.95758315793548e-06	3.31778370109317e-06	9.89521327108511e-07	8.1266861582023e-07	5.66569396753066e-06	2.69219919906764e-06
pos_1943	3.18000425263636e-05	3.79238844326184e-05	1.08241338668666e-05	1.21838798149784e-05	1.41344025579401e-05	1.23490084823195e-05	1.58184242404423e-05	1.1366498958756e-05	1.02172091244492e-05	1.34172487593235e-05	1.62867970747932e-05	1.83659643088841e-05
pos_25	0.000153990941112849	0.000177603040331368	9.46050624215945e-05	9.14360375651152e-05	7.0496500677293e-05	7.73299782856646e-05	7.66374352340859e-05	8.4701327132151e-05	7.80320239001556e-05	9.62917279386766e-05	8.13164042610102e-05	7.27644416131749e-05
pos_1741	6.48178100858287e-06	7.87731590058815e-06	1.13833841050177e-06	8.1223137889473e-07	6.38669320173664e-07	0	2.06274175985181e-06	0	1.23867316745793e-06	9.92690932523739e-07	2.024447483173e-06	0
pos_2561	2.33541365243932e-05	2.9603250650573e-05	6.86434976181779e-06	3.08452865640491e-06	2.81665993863711e-06	5.84352012688452e-06	9.44305659041683e-06	5.73223919856015e-06	4.83029178687148e-06	9.47812489132107e-06	7.79964993748026e-06	5.55510407325477e-06
pos_1426	4.55946621097985e-06	4.48234601909865e-06	1.13876770129807e-06	1.5300939836399e-06	8.87681700629777e-07	0	7.30840607897929e-07	0	0	0	2.23662808495101e-06	3.19222856908632e-06
pos_2152	1.07352317859342e-05	1.15078659202717e-05	4.0126230584121e-06	1.89942139699461e-06	3.10645253186537e-06	2.66242256929835e-06	7.58371121990257e-07	2.74864173342628e-06	2.29708161633981e-08	2.51632368152903e-06	8.17944198582465e-06	2.87648811636005e-06
pos_948	1.78798267975654e-05	1.77104700423362e-05	5.41644088962596e-06	3.41158649893786e-06	5.0636327297415e-06	3.40520820777479e-06	4.13960039896172e-06	1.00836876655452e-06	2.50031340545901e-06	6.9001050004221e-06	1.00173873586141e-05	2.12653430232397e-06
pos_2192	0.000135497673892434	0.000110663171587337	7.85400181601917e-05	4.8052170767097e-05	6.44341042307777e-05	7.82204022482555e-05	4.77398796837856e-05	4.64403051174801e-05	5.32899373656628e-05	5.45468381921281e-05	0.00010003151668548	7.07693234307901e-05
pos_2329	4.27039827289438e-05	3.1722684206982e-05	1.85123214328986e-05	7.15365929101591e-06	1.23251148047795e-05	1.01318625594882e-05	9.97208410346896e-06	1.47105554517998e-05	1.45855989254215e-05	1.05974930285103e-05	2.5201473867592e-05	1.91831585197803e-05
pos_1606	9.59560698251885e-06	5.23168316002417e-06	2.04777327338823e-06	4.97258196635482e-07	2.3061787551492e-06	8.31779586635507e-07	7.09185036523205e-07	1.33427229552302e-06	1.31654607631304e-06	1.20249699866545e-06	2.80385970353847e-06	1.54890931039916e-06
pos_1833	4.57768659351666e-05	3.54200402164468e-05	1.77280417822524e-05	8.95333046315138e-06	1.6613017082694e-05	1.53670280439253e-05	1.22990768183517e-05	1.33626234625021e-05	1.45656315496084e-05	1.48719286962278e-05	2.28822135078201e-05	1.69128485358349e-05
pos_1168	0.000963512694833286	0.00100351216732148	0.000713153165304309	0.000713894341443796	0.000655533212288351	0.000765165104175288	0.00072020720581387	0.000741441187960727	0.000687125002357326	0.000876762130938084	0.000779589658603413	0.000704735400805731
pos_2307	6.06097302199224e-06	6.00115815101288e-06	0	7.45994550353516e-07	0	1.65833247434613e-06	0	0	0	6.47258845760221e-06	1.52457057376009e-06	0
pos_2081	7.79816105664718e-06	1.63022262815155e-06	7.8184420400296e-07	0	0	1.93379870347001e-06	1.83155497540125e-06	8.54722230918027e-07	0	3.35957625695489e-06	5.43334443146548e-07	0
pos_441	1.6951147773309e-05	5.74415636120688e-06	1.87365111498547e-06	2.06979543553848e-06	0	2.67580809788964e-06	1.56722805750432e-06	1.71729736448524e-06	1.74700903129284e-06	5.74365690707333e-06	2.95390866141779e-06	2.62125692793214e-06
pos_753	0.000527254369294535	0.000413715653018287	0.000298038872801176	0.000235447324355372	0.000275433453135815	0.000349751677819401	0.000276958238703695	0.000252935771057226	0.000170256993926771	0.000322142851177312	0.000217077490023153	0.000263956937065438
pos_2172	1.36432299640174e-05	6.45967792115051e-06	5.32044012666141e-06	3.0721005884084e-06	5.80707567188402e-07	4.53625146176283e-06	0	8.40674705117073e-07	0	7.9761549586171e-06	0	1.83204678730368e-06
pos_2451	1.34181463511195e-05	7.2967604328533e-06	5.30726378434057e-06	3.17620500695039e-06	2.56442465866907e-06	3.64284635939445e-06	1.53936094980424e-06	2.1910626903825e-08	2.65794734131898e-06	6.32206268464368e-06	1.38751179762921e-06	2.17972924650479e-06
pos_2195	9.38988700395841e-06	5.31365042667359e-06	5.62397443747261e-06	0	4.08794814846407e-06	4.01073521123722e-06	3.06225022328521e-06	1.64260436113706e-06	1.08545827833566e-06	5.91139955692567e-06	3.63216176742778e-06	8.72744393542493e-07
pos_542	9.4108834942266e-06	5.71765806169901e-06	3.83836222392221e-06	2.81613657186e-06	2.92923965800247e-06	2.52082073274049e-06	3.45632151344332e-06	4.0977237585274e-06	1.01485773195894e-06	4.0820742389298e-06	4.56018081721467e-06	1.88614495218008e-06
pos_1709	1.80215762227263e-05	1.12998992373128e-05	7.39459374326103e-06	7.79686902947528e-07	8.3170423297223e-07	2.43670719000913e-06	2.02252000986187e-06	3.01600652147112e-06	3.24934219614462e-06	6.74515129807414e-06	3.24019917249736e-06	0
pos_1508	0.000498530076441526	0.000281718992300684	0.000219020988224835	0.000146445622492147	0.000192305612589844	0.000210746920444462	0.000162819423240384	0.000172534761031269	0.000133571647444143	0.000195189995441558	0.000186915051289055	0.000167892930077103
pos_2683	0.000144924149313717	0.000104516205444466	7.95974833690492e-05	6.9471930379464e-05	7.72145199376143e-05	7.95904891951302e-05	7.82547233777296e-05	6.9784162097572e-05	6.54710034053828e-05	7.49308768797797e-05	7.62692441852248e-05	7.60519348460574e-05
pos_2430	0.000504104238632527	0.000372769037970874	0.000198822065909414	0.000159397941345368	0.000180289040926048	0.000232848176704314	0.000179008919533856	0.000166044133404793	0.000188354129214614	0.000198875361693921	0.000238431267183373	0.000165594659383224
pos_2607	0.000578857471670631	0.000443168355895264	0.000329474279219508	0.000242329334063514	0.00028696279116321	0.000327417855780569	0.000263218204200946	0.000258323147768887	0.00022015014270156	0.00031727029442554	0.000357259992928781	0.00025035785589854
pos_2794	2.04266428390492e-05	1.14006117829884e-05	5.41064447304272e-06	1.93113722299448e-07	3.09696297525971e-06	5.5686258334173e-06	1.83539068382186e-06	4.53759101464241e-06	2.4407107762944e-06	4.60201941900662e-06	7.51011626179454e-06	3.28261011851109e-06
pos_1026	1.26496819423674e-05	1.15753400944933e-05	3.19647613513613e-06	5.73888393949322e-06	0	3.07482324843295e-06	0	5.65855175137993e-06	2.62656852047981e-06	4.76423958899552e-06	7.29505368242742e-06	0
pos_1908	6.62961648231401e-05	4.15257327742404e-05	3.46795220020815e-05	2.38587833094869e-05	2.31711022761307e-05	2.65541554270807e-05	1.52433673859452e-05	1.88076684602546e-05	3.20705248359784e-05	2.94412644439757e-05	4.12751908370587e-05	1.81368316413224e-05
pos_675	1.16531481606977e-05	7.8396933175969e-06	7.31500318467026e-06	6.52275168207002e-06	5.0272322653273e-06	4.28180646621542e-06	2.27376434068084e-06	3.9615087846994e-06	5.04624147895683e-06	3.28439293971163e-06	5.25123177566147e-06	2.61766307248173e-06
pos_1295	1.26729803605664e-05	6.24730321695186e-06	1.34483003283512e-06	2.81674896187754e-06	7.48812236036562e-07	7.1300865169679e-06	8.59906481880739e-07	3.0697949566729e-06	9.81137529856532e-07	1.0848958248778e-06	3.29665821910793e-06	0
pos_2273	0.000181201431838275	0.000110439179503455	3.59582502166632e-05	7.1546301221552e-05	4.2373193488739e-05	6.33392064683269e-05	3.9614783348699e-05	4.43163964665231e-05	5.83452215465452e-05	2.86491441198458e-05	3.35835456720649e-05	4.21286546890207e-05
pos_343	0.00146322924043247	0.000645016721393939	3.11061638099424e-05	0.000458610431015023	4.22374232857493e-05	0.000435086229160305	7.96511160316536e-05	0.000233885568025901	0.000124274702751089	0.000286184645787942	7.62837759084766e-05	0.000136142787523297
pos_1630	0.000164965874678097	0.000153469267772032	5.91474745947369e-06	0	1.67414798942142e-06	7.32097858797043e-05	0	2.37792264427274e-06	2.62947519467306e-06	4.46792369598116e-06	4.8914318304038e-06	1.9006238593453e-06
pos_294	6.23379563821086e-05	6.79404793946435e-05	4.29618450065227e-06	3.23365002980898e-06	5.50423781443053e-06	1.9986739274558e-05	2.72046265905986e-06	3.64085460030578e-06	2.78481921436138e-06	4.59162104057987e-06	3.13496484088996e-06	2.87350269051946e-06
pos_2035	1.39338403828139e-05	1.16257048335995e-05	2.22061280909913e-06	0	2.17652067792621e-06	6.77159008342976e-06	2.4675717370515e-06	3.75881808475347e-06	1.03939206542284e-06	4.13735732748053e-06	2.93460977075323e-06	2.11117291610482e-06
pos_1449	0.000103243618503701	7.83937194420573e-05	1.92272262493809e-06	3.3183485001123e-06	3.78323754798253e-06	4.89880844634856e-05	3.36367223595415e-06	2.95540915838002e-06	4.51110998867978e-06	3.37097580768196e-06	1.96737453416548e-06	4.39617167286922e-06
pos_591	0.000697221826584182	0.000473202901571311	1.70156307326056e-05	1.81827762636247e-05	1.89455074967437e-05	0.000261289820270171	2.24734209088743e-05	1.95923537464932e-05	2.25054559544737e-05	1.91739710304297e-05	2.85243125345063e-05	2.37156631460568e-05
pos_1453	1.8306323272196e-05	1.10269284012528e-05	5.1599383931059e-06	2.58362754015176e-06	5.61448628660907e-06	5.95249274722118e-06	4.37392946335754e-06	4.44379067469533e-06	7.01990120642511e-06	2.76904833344519e-06	2.53884692892191e-06	1.82181262946048e-06
pos_2139	8.07664313717267e-06	5.29774083865406e-06	2.31670838968421e-06	7.82911626910462e-07	1.66591774057428e-06	3.69869840822463e-06	6.05934000530515e-07	1.88920760193156e-06	3.13252915962222e-06	2.4808863736213e-06	8.36483105935722e-07	1.86664800961816e-06
pos_1307	0.00216949753161676	0.00166345128763775	0.00131368858250914	0.0015055779900238	0.00153363350371889	0.00151887869208602	0.00148988129499353	0.00155028443301969	0.00167534961564716	0.00162724523989405	0.0014882139028658	0.00133971181005205
pos_1956	9.94317950489739e-06	3.45069808580186e-06	9.48616971071794e-07	1.18900590962605e-06	5.7154499612554e-07	1.90760907589158e-06	2.26461126052198e-06	0	3.57868071196798e-06	1.30831027332239e-06	1.58461474081699e-06	0
pos_573	6.77819416525189e-06	2.77674379497741e-06	0	0	4.64976125823559e-07	1.10366704475088e-06	1.05569848508698e-06	0	1.11604631872984e-06	0	2.94103757820985e-06	6.43886043755804e-07
pos_1005	7.27384813662508e-05	5.06632478351181e-05	3.34830463533819e-05	3.51713540738406e-05	3.76905549919153e-05	3.23635637828467e-05	4.30996677093678e-05	3.54024016204916e-05	4.74674269697067e-05	3.10740657141884e-05	4.66893124317539e-05	3.0586890091983e-05
pos_730	7.32914829718659e-06	3.20728595847363e-06	0	1.96719626208425e-06	9.79957678035747e-07	0	1.1923468115683e-06	9.19501219554178e-07	1.54900656040647e-06	0	2.6634165143636e-06	4.70445665243282e-08
pos_2718	1.46649281201516e-05	7.80797772597592e-06	2.06104885007301e-06	4.56871729378806e-06	2.57859641324757e-06	2.0816989160572e-06	2.92001860014302e-06	1.12540576358813e-06	1.57555445473007e-06	0	4.16762313642079e-06	2.43911524694663e-06
pos_1790	1.16236010142847e-05	4.89618952298011e-06	0	1.20090390511309e-06	2.7070604712863e-06	1.23891014815486e-06	9.06237348942013e-07	3.02329591633743e-06	2.49495247989789e-06	9.58325823605224e-07	2.60841888241088e-06	1.31577411844522e-06
pos_1658	4.55942843215629e-05	2.63921903545958e-05	1.49432289940826e-05	2.08456456676908e-05	1.66811205257417e-05	1.67321665351241e-05	2.09247199462063e-05	1.95824234500931e-05	2.27953527641292e-05	2.11925019243239e-05	2.2050409910681e-05	1.78222028363768e-05
pos_900	1.83316970266969e-05	8.67168602618264e-06	1.87583679589301e-06	2.33598006453601e-06	2.36716424524634e-06	2.54182754893925e-06	2.7879645787041e-06	3.09242861240444e-06	5.11444096790915e-06	4.41268795474201e-06	3.11793637681295e-06	3.84182220973752e-06
pos_211	0.000184952607629836	0.00017676137513409	0.000220704459728434	9.0474559079514e-05	0.000100908303658983	0.000147738229696091	0.000113563498168652	0.000109792829344319	8.55930627432335e-05	9.99360924884693e-05	9.8154681575477e-05	0.000139055963137303
pos_246	0.000417785095076963	0.000444537071219797	0.000528150742271857	0.00011414169864931	0.00012030013051234	0.000399798694383201	0.000198268486444855	0.000204076090246773	9.14025383251152e-05	0.000267396618279624	0.000236543234290743	0.000333685096021293
pos_1099	0.000198608540701613	0.000153472507352637	0.000217508638735704	0.000135336151002151	0.000132324096121992	0.000184102689038013	0.000149084632352314	0.000149811990007791	0.000107625960241052	0.00017518225452934	0.000165361913492948	0.000196080947393376
pos_2524	8.1039689728586e-06	4.35803791749774e-06	8.36738141888255e-06	2.9524563327241e-06	1.65875083973825e-06	4.41081323965608e-06	1.82711656972351e-06	3.70586314234483e-06	2.22742358146156e-06	4.60807953809335e-06	3.41385195450209e-06	5.55783100423788e-06
pos_1903	3.17200811460363e-05	3.05114252440815e-05	4.33383379188747e-05	1.74549533845537e-05	3.20385233819809e-05	3.54028123822028e-05	2.24879592667725e-05	2.67792413975358e-05	1.84251653178494e-05	2.96254241263195e-05	1.50766246608634e-05	1.98393828470214e-05
pos_764	2.47890004363168e-05	6.33313917544329e-06	4.06046901205346e-05	4.67399327292236e-06	1.38931812063337e-05	1.73959352510677e-05	9.91548809171893e-06	7.23729910850697e-06	4.52585653652184e-06	1.65081738097929e-06	1.30882323098223e-05	7.03662141249226e-06
pos_50	0.000103852211997956	0.000115225720999551	0.000207468785562173	7.94586093436374e-05	7.18923110585073e-05	0.000112674077096062	6.5449433195669e-05	6.98663991004923e-05	4.42500410484102e-05	4.39174819899173e-05	7.00812443636403e-05	7.04894132789419e-05
pos_905	9.38066007886226e-05	6.13499288043576e-05	0.000156596516850164	5.32897830086274e-05	3.64614017799739e-05	7.63623812704565e-05	4.33018150417571e-05	4.91762703329656e-05	1.88200530340049e-05	4.10548854664278e-05	3.81837932551373e-05	6.83849485627638e-05
pos_614	1.225322730967e-05	2.15848907912596e-06	3.96953458032898e-06	3.84980973540426e-06	1.26944182144564e-07	4.44914863843261e-06	3.65586288698172e-08	5.94399002161634e-07	4.88515567118733e-06	1.38615881849787e-07	5.79251423824653e-09	4.41359390177307e-08
pos_488	6.98920634425824e-05	4.09865495504691e-05	3.05201500534651e-05	2.30889065246238e-05	1.62246274066655e-05	2.64886035950766e-05	1.29083499541467e-05	1.85321853357624e-05	4.49337430873169e-05	1.74165335741013e-05	1.49808863385266e-05	1.54005902531664e-05
pos_84	0.000182017368520405	0.000115119789983944	6.38969723660283e-05	6.54968220420819e-05	1.02688430477963e-05	8.39768884581726e-05	7.16620742177369e-06	2.1694430647646e-05	7.57378118982191e-05	2.73129974765128e-05	2.06267576056499e-05	1.33932084155007e-05
pos_2820	0.000111576349447508	7.38761043451011e-05	7.98718974633845e-05	5.54491861195574e-05	1.86523252585342e-05	6.38922409585642e-05	1.89038472740544e-05	2.35011687175363e-05	5.97267321080274e-05	1.82915840133383e-05	1.82938802125939e-05	2.31349307678286e-05
pos_58	0.000149380036394272	0.000109645752526162	9.29616098739696e-05	8.7587345736383e-05	1.70274486456102e-05	7.6248103928916e-05	1.44738441518101e-05	3.07704137044168e-05	7.45264970293775e-05	3.05503657513902e-05	1.24523210446998e-05	1.14235651718216e-05
pos_605	0.000187985353090952	0.000150167139763978	0.000115697510289205	9.75866835780976e-05	2.27846143645199e-06	9.55602434386027e-05	2.94989121588585e-06	1.78207061470256e-05	5.96786090692995e-05	3.34088765328241e-06	2.77189881191008e-06	1.36235545961718e-05
pos_120	0.00057658384549959	0.000332279293012875	0.000324707344172667	0.000215840701637864	0.000162963529955938	0.000253069277176471	0.000123274947594184	0.000157430254546731	0.000248114843348025	0.000123212390438883	9.98167349937268e-05	8.31983989788877e-05
pos_2191	0.000314654877251857	0.000187814639919368	0.000157240674571781	0.000133003172185503	6.40206713073059e-05	0.000145822520019375	5.42304792506709e-05	6.30895311752978e-05	0.000100704986804761	5.96120754802832e-05	4.19825912545813e-05	6.76672545869567e-05
pos_434	4.8063500541604e-05	1.9613243962012e-05	2.65186294982331e-05	1.38938174990085e-05	7.44002678574519e-06	1.86882878046255e-05	4.36100390303156e-06	7.87563399544254e-06	1.2575306510089e-05	3.43256570769086e-06	3.42895478025642e-06	1.5144881601952e-06
pos_496	9.59271293881556e-05	3.63992231095985e-05	5.26087361127946e-05	2.91206373639248e-05	1.37009820625277e-06	4.020931612617e-05	1.74123443259143e-06	6.20527752725508e-06	1.99393218821838e-05	1.30798496820286e-06	2.8440212379531e-06	2.80351544625248e-06
pos_1572	0.000420899549046064	0.000224995017531134	0.000286487559230178	0.000119117176752181	2.27918021040984e-05	0.000210856228464749	2.17310713916936e-05	4.83642476357147e-05	0.000125715761802576	2.08085554706771e-05	2.11460843023292e-05	2.56210229887475e-05
pos_268	0.00011982766901343	6.39763751329079e-05	6.90906509893135e-05	1.82894832277181e-05	4.31025476324088e-06	4.20297773678383e-05	4.99413679820928e-06	6.83679418527155e-06	2.1986203658583e-05	4.55988558354288e-06	3.18871000396651e-06	3.09099463268671e-06
pos_2415	7.07718865316573e-06	5.10566261535506e-06	5.7431712556681e-06	4.17830831295956e-06	4.42091039154591e-06	4.59965310127439e-06	3.76633086883453e-06	4.54801690791791e-06	2.748594046883e-06	2.86963864900982e-06	1.63924300263969e-06	3.26566947620857e-06
pos_69	0.000648469700280066	0.000475852122277354	0.000491290627272429	0.000354652343394359	0.000342788603213195	0.000406914931658778	0.000316275996425652	0.000315608392832371	0.000347616375132138	0.00031521279409279	0.000256570437748426	0.000417880648386063
pos_776	0.000216061658234805	0.000143747411270809	0.00013308505304734	0.000123181517847502	0.000120822649984705	0.000117916080363604	0.000120981601103501	0.000104560029096236	0.000105618956903748	9.36376543043731e-05	7.03413114784582e-05	0.000101545362213019
pos_336	0.00104726669054364	0.000744438426719033	0.000874108600642789	0.000596695409900136	0.000519659544161642	0.000767159283377265	0.000683440535015957	0.000662812230129225	0.000626012407828394	0.000725542160193879	0.000374476224192914	0.00085523004644435
pos_1677	0.000601507552745697	0.000502270632683005	0.000422819375709939	0.000480291983192327	0.000342761895923309	0.000440870720926479	0.000387205561279824	0.000393481335292569	0.000390632577413616	0.000442379615862584	0.000311707435230691	0.000423768395121964
pos_1826	0.000375349016531848	0.000221309157888244	0.000245856230292932	0.000248661172828877	0.000162585610680252	0.000234145884860547	0.000177212093914633	0.00017857964339544	0.000206591709431079	0.000213261647170761	5.6569959462156e-05	0.000184387448396526
pos_511	0.000115688643989372	0.000120437096448191	7.91262271198653e-05	9.12690044041112e-05	7.08898104748157e-05	5.01794837554278e-05	6.3530049874962e-05	5.36479807475491e-05	5.5894350131234e-05	5.26906255690063e-05	4.10910621173792e-05	6.18898247638895e-05
pos_684	9.1334043614106e-05	6.78580982921958e-05	5.67712682422634e-05	6.76309956093165e-05	4.11809790101411e-05	2.0951478230888e-05	4.52964384644589e-05	3.32545519989415e-05	2.6565438156603e-05	2.1313952658696e-05	2.82092602902238e-05	4.25374268024546e-05
pos_1241	6.40474668878078e-06	5.4275043755997e-06	4.43892150244346e-06	3.057057835594e-06	3.97999287191784e-06	3.17792738853481e-06	2.99268812382905e-06	2.45960383250038e-06	1.23599381832875e-06	2.48061825677569e-06	1.77381825455426e-06	2.99997305126388e-06
pos_1517	1.43573833160033e-05	1.41966680311024e-05	1.24007991957222e-05	1.23548163401998e-05	1.22348578331371e-05	1.22123700813334e-05	1.09453141585854e-05	1.08193554738623e-05	1.09542792590636e-05	1.12793509666618e-05	1.1009524057577e-05	1.17028687112189e-05
pos_1130	2.90570387738273e-05	2.87973609376459e-05	2.59397252245837e-05	2.35595518337223e-05	2.31502859121247e-05	2.27119592211572e-05	2.12076415659828e-05	2.28694287896063e-05	1.94858454173233e-05	1.82904622729169e-05	1.88618060688662e-05	2.35281474622392e-05
pos_2232	8.40435960674468e-05	9.59192611552736e-05	7.90569230720145e-05	8.47472827092534e-05	6.87843676054408e-05	7.11884119485424e-05	5.49645386420553e-05	5.95660141497837e-05	4.60046373341267e-05	4.71398622903733e-05	4.21472645865105e-05	5.58063352573564e-05
pos_1509	5.1285710602548e-06	3.92383898305321e-06	2.67611363850322e-06	0	0	3.55704313657996e-06	9.17865890860539e-07	0	1.24640828015713e-06	9.50334006318637e-07	0	7.97310652938733e-07
pos_2237	7.5120328095785e-06	8.25256800453696e-06	2.41435354428127e-06	1.36004204641564e-06	7.39514170445669e-07	6.0503396741447e-06	2.5981375418073e-06	1.07905829713708e-06	1.8405469886444e-06	1.49644643062806e-06	0	1.05283609005274e-06
pos_1459	6.64360117622537e-05	6.22507220680008e-05	5.12544387240314e-05	5.33999646576313e-05	4.46652007767236e-05	5.33844626835507e-05	4.45609595969707e-05	4.87146548623488e-05	5.17095859048296e-05	5.61927392043636e-05	4.74664267894667e-05	4.58011059214922e-05
pos_2668	8.76122563693226e-06	7.48134759219656e-06	6.02120124704375e-06	5.59950540364434e-06	4.1049899929343e-06	5.60118185576896e-06	3.73693943016811e-06	5.4732403522611e-06	5.81811611222635e-06	5.89513395617505e-06	2.67016966884243e-06	4.04541942960719e-06
pos_1143	7.45195400458137e-06	6.70664798489389e-06	6.36832831399463e-06	1.30459372443255e-06	2.1367799335147e-06	5.25051210775874e-06	1.36535314825349e-06	5.13156736766791e-06	1.71658318304358e-06	9.18290147686821e-07	1.85788846995226e-06	1.34561322289143e-06
pos_2444	0.000702048694553241	0.000709277297197037	0.000701021663054444	0.00066449173602273	0.000580677868536607	0.000680155807418786	0.000602275608674815	0.000633956949505906	0.000572350889728526	0.000648047230644676	0.000552428079649909	0.000616911789121983
pos_855	1.89246978205972e-05	9.61258860811048e-06	1.5362257946496e-05	7.81625807302333e-06	1.47559834415684e-06	1.12169501621349e-05	6.82581618172501e-06	4.12536575718543e-06	0	6.02623380330954e-06	3.30252392225099e-06	3.61365250389133e-06
pos_1370	1.85471589702265e-05	1.41158741298001e-05	1.3822956366106e-05	4.52544860509124e-06	3.46808654564704e-07	6.66522024259159e-06	2.7550334907704e-07	5.08894023222634e-07	2.74876998979499e-06	1.8953720964621e-07	0	9.17553807195752e-08
pos_2218	1.2398832645844e-05	9.24526602173704e-06	1.52214112274094e-05	2.7848740219841e-06	0	6.01225476192585e-06	0	0	1.52361398621242e-06	0	0	0
pos_1180	0.000326569621825361	0.000320636273840527	0.000376152762860401	0.000134511448926682	8.73226451032093e-07	0.000211077003869773	2.672021042301e-07	1.23058559592231e-05	0.000112274177783131	1.41789851109209e-06	3.22435747774862e-07	8.35321758639335e-07
pos_2568	0.000242644339159757	0.000217729606293515	0.000266394159727697	8.26105194462058e-05	2.05633266207401e-06	0.000129364256904878	2.92008604518797e-07	3.9964472938893e-06	6.66342777296451e-05	2.85150101923268e-06	2.05332612217408e-07	2.82703405727531e-06
pos_1101	0.000376554780975181	0.000347596813525257	0.000402181536871603	0.000369473113207881	0.000175167601524036	0.000321049085193097	0.000137995092024966	0.000199042838561865	0.000235565599602341	0.000194095616979737	0.000127040415818954	0.000104396872529043
pos_2274	3.14257269830395e-05	2.41011738039024e-05	2.66840875361516e-05	2.34160022661326e-05	1.10519958658337e-05	1.94563814718067e-05	8.85790573213916e-06	1.0773874868667e-05	1.61254220922417e-05	1.04886197056703e-05	5.05498925459483e-06	5.52338248480165e-06
pos_1653	6.06324947033425e-06	8.57988856873519e-06	8.88643537148372e-06	5.84955415754121e-06	1.60317723886771e-06	5.93706403160147e-06	1.19583604818397e-06	1.49648939819358e-06	4.53849361562092e-06	2.15225514203341e-06	1.26511166039424e-06	1.20357869491511e-06
pos_2217	3.50411173562552e-05	4.35368822175474e-05	4.12308757833539e-05	2.19966285201795e-05	6.98450245997044e-06	2.40837821661211e-05	2.30131437801194e-06	5.93522047948137e-06	1.74835049950224e-05	1.20898727267271e-06	3.25983293520926e-07	3.63275017897762e-07
pos_2142	0.000578744580310164	0.000652552452454275	0.000628584383162663	0.000313834577719133	3.91212298098121e-05	0.000411832961233399	4.0204140868438e-05	9.65743642621704e-05	0.000304212906614103	3.94080373704698e-05	3.61347431796016e-05	3.9624726298035e-05
pos_2726	5.8069857317188e-06	6.0007016439007e-06	6.3111508135066e-06	3.49093648047599e-06	5.03961231750085e-07	4.25095002201264e-06	6.41862472184432e-07	1.00734504411042e-06	2.64767465405844e-06	4.76183283719477e-07	3.38439851025723e-07	4.98726197099223e-07
pos_171	0.00015727986599281	0.000152712851748616	0.000154594245890527	8.77134152610845e-05	1.20708137270274e-05	0.000106074078167348	9.95783215804234e-06	2.62328037146796e-05	7.36182320650965e-05	6.56725330852377e-06	9.02602190435668e-06	1.09637230685815e-05
pos_578	5.17078771364461e-05	5.14476343591422e-05	5.23913205674296e-05	2.83574841912859e-05	2.55969856939223e-06	3.63520918933274e-05	2.82106061566809e-06	8.2105151227664e-06	2.40572886170949e-05	1.95384253080134e-06	2.64599744654588e-06	3.7919636745499e-06
pos_736	9.33700879949189e-05	0.000101917000749561	9.55484734785898e-05	7.40526928333921e-05	5.70906927610043e-06	7.95304484676048e-05	8.16954530371788e-06	2.40885191279982e-05	5.85902738638851e-05	6.51235243010823e-06	8.04430295528371e-06	1.1595345672377e-05
pos_2565	1.21011420215864e-05	1.28082555267511e-05	1.31091222232293e-05	8.84953248856816e-06	0	1.01549231861361e-05	0	2.12273876301124e-06	9.00809993142853e-06	0	0	1.8192695533641e-07
pos_1434	0.000992764592237792	0.000973770939158533	0.00105425588001819	0.000683988168007077	1.786934163129e-05	0.000695105137800081	1.93499548715374e-05	0.000142304531724802	0.000593033460751	1.74591784618121e-05	2.34873176818525e-05	4.16647037278124e-05
pos_169	0.000119906615485683	0.000116451307149837	0.000119241974338063	8.62031203040669e-05	5.9508560456319e-06	8.96296971051631e-05	8.1738278484605e-06	2.60203497421662e-05	7.12925741751359e-05	5.50319443792603e-06	8.84149593907544e-06	1.18676738753736e-05
pos_137	0.000173893928184645	0.000177294662685662	0.000179773753278698	0.000131901885625438	2.41227576760009e-05	0.000137010659799997	2.43181109419071e-05	5.0594031133571e-05	0.000109162126041124	1.97511558758124e-05	2.24096864328154e-05	2.83048422175909e-05
pos_177	9.29527433516892e-05	9.40567269680116e-05	9.63911449398946e-05	6.93662648711207e-05	5.84347274634726e-06	7.27452671784096e-05	8.20323888911842e-06	2.28107930156945e-05	5.58567045964917e-05	6.11422266290188e-06	7.84459323925632e-06	1.10735785570469e-05
pos_1376	1.0054481960694e-05	1.16962725187996e-05	9.71768486525661e-06	6.89429874645566e-06	0	7.19593711026315e-06	0	7.16181342852175e-07	7.98012419853088e-06	0	0	0
pos_1781	2.9021360726673e-05	3.29876639221123e-05	2.86815025615071e-05	2.43405496352548e-05	5.82606866402045e-06	2.10782468048016e-05	2.63788816008932e-06	8.17103702515063e-06	2.15489884073793e-05	3.46742107997454e-06	7.5777366337567e-07	2.67110300241194e-06
pos_2134	2.82491352529398e-05	2.64599573521051e-05	2.47200777922947e-05	2.02308295139857e-05	1.81315469055958e-05	2.05263771416752e-05	1.35549569831046e-05	1.8069021312758e-05	1.94257521587354e-05	1.76580464812433e-05	9.84187299429003e-06	1.95414826495243e-05
pos_2491	5.22863357853225e-05	4.71520089551599e-05	4.4232645644285e-05	3.38238994927004e-05	3.70214831998335e-05	4.15203913003371e-05	3.15138417621978e-05	3.29040442038209e-05	3.45682925051863e-05	3.2890601084393e-05	2.67894848385891e-05	3.1340065180099e-05
pos_1922	2.7943239101155e-05	3.41248874677211e-05	3.044901909106e-05	1.69836496717694e-05	1.9717604934982e-05	2.26181013898501e-05	1.76174340760125e-05	1.90550168837915e-05	2.1184922695033e-05	2.13505545281667e-05	1.37472530848427e-05	1.91626392904881e-05
pos_2118	0.000129564708395062	0.000159543226897587	0.000111570961616848	7.30283286744815e-05	5.30825017477615e-05	9.34201905791098e-05	4.62525466598457e-05	5.73559206247615e-05	6.22339612084608e-05	8.15585182463953e-05	3.71475730933078e-05	3.98695540116375e-05
pos_786	4.35961086323528e-05	5.31003168085553e-05	3.50869949755493e-05	3.47078534370807e-05	2.47695226798784e-05	3.17837078504564e-05	2.26863412640072e-05	2.42357515544226e-05	2.75096892222773e-05	2.98574269299153e-05	1.72985725741605e-05	2.30278690578581e-05
pos_1314	8.32677852614526e-05	0.000114633372203692	9.65364218267481e-05	7.65019602748674e-05	5.39637452942184e-05	7.34904115621484e-05	4.27046724304506e-05	5.67294220553027e-05	5.87785358204991e-05	5.2759117371608e-05	4.27434314488199e-05	4.45751910200535e-05
pos_2622	0.000301122915944176	0.000334610066031765	0.000282023754933637	0.000184742180379443	7.60022149223299e-05	0.000232323787068686	7.21170875134866e-05	0.000110759982737507	0.000171108038970938	0.000146576333712696	5.09358593701699e-05	6.69713239542355e-05
pos_1543	0.000645905639795778	0.000512852989242155	0.000448383109395422	0.000362701897901769	0.000456705325816567	0.000493716087517378	0.000475047516547374	0.000493114956877432	0.000463764579150755	0.000632503168250189	0.00043279437335921	0.000472693004670614
pos_240	4.17752569596032e-05	3.48029976660336e-05	3.5372726564161e-05	2.88632723457427e-05	3.28684566550092e-05	3.21342246271601e-05	3.28366270411349e-05	3.41297318832712e-05	3.55328318826888e-05	3.84365576752243e-05	2.90679921402125e-05	3.44868251584377e-05
pos_1715	1.73473046639594e-05	7.33345067075387e-06	4.09904386036592e-06	3.08477631543283e-06	1.47500355124676e-05	7.54537595893937e-06	6.92949419670757e-06	3.91576430701058e-06	1.19170715825092e-05	1.64567148033015e-05	3.2888562741343e-06	4.2651089497517e-06
pos_713	0.000116341065500429	8.47460098345952e-05	8.69672017300705e-05	8.22017027202051e-05	0.000101312613970415	8.29698741153802e-05	8.5056398530341e-05	8.88503237396158e-05	9.66370081894302e-05	0.000103081903351904	9.05098715233694e-05	8.4523534996398e-05
pos_1220	9.50233074890048e-05	8.01644476988885e-05	6.8175518591291e-05	7.50767370477914e-05	7.8214088094193e-05	8.06016540686159e-05	8.1280591453114e-05	7.89732302249451e-05	6.58081309963895e-05	8.19658227193692e-05	7.96064822127622e-05	7.31707755972831e-05
pos_1276	0.000285125594691438	0.000264595848030734	0.000221865977192165	0.000236960401366221	0.000244096166113425	0.000259525604766046	0.00024388291586211	0.000254707479628878	0.000221946702853504	0.000258774635023333	0.000246030934667277	0.000241060963434663
pos_1261	7.20879649672561e-05	6.75384328557026e-05	5.24248681060879e-05	5.40231180282244e-05	5.77162942862406e-05	5.92450594857874e-05	6.35000070100167e-05	5.78430641177295e-05	5.81546404347082e-05	6.35953373938214e-05	6.46527214954552e-05	5.56837157894601e-05
pos_2536	1.01187003818157e-05	9.44706186968478e-06	8.35690273363424e-06	8.2625262445071e-06	9.18435635311745e-06	8.63465361934171e-06	9.34452106953925e-06	9.05573447350962e-06	8.6085044540635e-06	9.66152836431683e-06	8.85671508372007e-06	8.41293594383881e-06
pos_2296	1.43585525733902e-05	1.17982282243834e-05	0	1.97515525678807e-06	8.4733686661485e-06	7.78096854798695e-06	4.29789065777195e-06	4.4380289296004e-06	3.17688663229343e-06	6.08637417075597e-06	9.76298367728436e-06	8.70712264057576e-06
pos_2014	0.000291849199717918	0.000258606955271391	0.00020620533789976	0.000178022921120138	0.000215188356570343	0.000203176221427571	0.000220772644292325	0.000231244033845576	0.000198577542381496	0.000228531541133736	0.000208693507549904	0.000232183916633334
pos_2516	0.000162585138229998	0.00013815369054573	0.000102806063820092	0.00010638036527525	0.000114224372567633	0.000128104804522825	0.000122079528444267	0.000122262602425791	0.000116336510862394	0.000127506053243486	0.000124167302558482	0.000125190756996134
pos_2245	0.000129205787444673	0.000121553502491445	0.000102012094934681	0.000106368460239628	0.000109382600670999	0.00010744078760863	0.000111555894405933	0.000112708678862767	0.000102475577175422	0.00011302950273933	0.000108000180703382	0.000106790876931723
pos_1135	0.000111460767771895	9.48839835491075e-05	8.10656502145795e-05	8.42795701736856e-05	8.80273457404817e-05	8.80450874044308e-05	8.9319423076233e-05	8.77557499777824e-05	7.95503210924722e-05	9.15076169598596e-05	9.08262437363655e-05	8.87314301080973e-05
pos_1284	0.000932394074494164	0.000795458295448874	0.000685435962281301	0.000693785258125828	0.000747979463426558	0.000754916321404609	0.000752610016036701	0.000740091995070497	0.000675413854450315	0.000788985751756498	0.000740531422106218	0.000723802341021184
pos_1199	6.25878855365323e-05	5.31058372403036e-05	4.96084790559978e-05	5.27975018922765e-05	5.56158816511819e-05	5.42254927266013e-05	4.9690102763663e-05	5.10688115475977e-05	4.6141516747142e-05	5.61910413396207e-05	5.64170580083998e-05	5.16844207757809e-05
pos_2199	8.96301121205312e-06	1.34148385432485e-06	0	3.3140755713762e-06	4.28127851854417e-06	3.81458476479564e-06	0	0	8.56785380610699e-07	4.63995123855836e-06	2.28827887026962e-06	7.66206060565091e-07
pos_1014	4.37299840012898e-06	1.12810205371654e-06	1.46172732824887e-07	0	2.04544548982886e-06	0	0	8.62691129430312e-07	1.84034817413664e-06	3.15696813997665e-06	3.07986457919072e-06	1.63600205982887e-06
pos_423	0.000170514210140214	0.000163375651155326	0.000125893739151298	0.00013829962124118	0.000152413866251079	0.00012998507205705	0.000123834150896507	0.000127253549998859	0.000146793958016172	0.000148854681208197	0.00013695874089453	0.000141987948956023
pos_1248	7.27937688743303e-06	1.91119367320607e-06	2.09961928551289e-06	0	0	5.61763743287234e-06	8.4742868203384e-07	9.35717321816451e-07	1.07254822091939e-06	1.09353927396022e-06	2.80738716624481e-06	2.08240165138295e-06
pos_1433	0.000518425994795781	0.000235444025996873	0.000351826523135804	0.000142679032145728	0.000159529846376317	0.000367281203785349	0.000248133412945093	0.000309627291370091	0.000254614809597739	0.000233289164279591	0.000301407774482569	0.000241269437658232
pos_160	1.25789557762962e-05	9.94107925631597e-07	7.82004673792524e-06	2.32450045588991e-06	2.20382177434675e-06	5.03615710442826e-06	4.13421219777507e-06	4.07072254609721e-06	5.73116915222786e-06	4.72116212247764e-06	4.84332043522883e-06	7.17590743767209e-06
pos_884	0.000326474388767202	0.000202052055228842	0.000312650541294357	0.000196795404491322	0.000216085196630485	0.000280304153730443	0.000198416544073272	0.000228645282316864	0.000251892506974771	0.000266609997791069	0.000252443236299998	0.000233877990698396
pos_1597	3.47221615334842e-05	1.882461933281e-05	2.13662551688396e-05	1.65698598387661e-05	2.11801862347038e-05	2.16912261764233e-05	1.8712990434916e-05	1.6114329415782e-05	1.40716601011524e-05	2.22659158233891e-05	1.66573930610963e-05	1.66601883040283e-05
pos_1661	2.93281299241309e-05	1.09743705561238e-05	1.72354402308556e-05	1.40357306840507e-05	1.46261285697008e-05	1.73349859393937e-05	1.38891337057238e-05	1.29185647853683e-05	9.55467889055617e-06	1.53588434529149e-05	1.06105331922654e-05	1.37897644623439e-05
pos_1682	2.22671967949894e-05	1.07995588050793e-05	1.3103687928958e-05	1.09994696699278e-05	1.21744174481169e-05	1.33327060926436e-05	9.70673931416209e-06	1.16833902759275e-05	9.40445888650934e-06	1.32180594271931e-05	9.96085994029507e-06	1.16283085334943e-05
pos_2563	1.89204843123998e-05	8.22772547189543e-07	5.26912732179718e-06	9.00837741176844e-07	3.45236659756525e-06	1.97668920760849e-06	2.86207344892826e-06	8.14963148010191e-07	0	0	4.77834601208687e-07	2.62027643369006e-06
pos_670	1.85277455714231e-05	6.96668025826381e-06	8.11770780020597e-06	4.43332202798866e-06	6.83238409445701e-06	5.73131468256602e-06	5.32378331368111e-06	5.56679365799268e-06	4.17111006557007e-06	4.7499861305747e-06	4.65587721336798e-06	7.146967979969e-06
pos_1327	2.47839804968465e-05	6.1059696391284e-06	9.61115883272584e-06	8.76793689051337e-06	1.209976075925e-05	8.76283551695161e-06	8.23049306348961e-06	9.16079349602323e-06	7.49127240745354e-06	1.0674384094721e-05	8.71787606722655e-06	1.03376790390848e-05
pos_1789	0.00173670135870755	0.000546292776914039	0.000769601965354044	0.000685746160597184	0.000946319078359371	0.000758376929346838	0.000703707371337925	0.000726256196144979	0.000490462242661713	0.000638595151243396	0.000488564306150751	0.000714235387738719
pos_1788	0.00276752128088893	0.00079194193092646	0.00121735626887987	0.000940983745232361	0.00140404577113039	0.00116575246078691	0.0010371732859331	0.00102835197846709	0.000735544519799722	0.000940978896031397	0.000789141225298231	0.00104308579782491
pos_763	0.0020059518129776	0.000551425457708937	0.000832489527865788	0.000636175650178524	0.00096502807611939	0.000789951534348184	0.000724940661272269	0.000703631563355752	0.000498827874887991	0.000657689923875457	0.00055159381486817	0.000700093635028893
pos_1579	0.000256889827136537	9.59515759885036e-05	0.000120384592442054	0.000101762105892822	0.0001386323030964	0.000118150719877655	0.000108918745479981	0.000109342559699374	9.28368006301119e-05	0.000102712869092841	8.76836238098489e-05	0.000104498184678378
pos_1161	0.000334731008373767	0.000126364365919649	0.000158793011226878	0.000130786806833907	0.000178243671836602	0.000148430618618313	0.000141546586336688	0.000139031145452527	0.000109484399267175	0.000130171629492069	0.000113803236067314	0.000134985136835462
pos_1365	0.000324776566342586	0.00012598224483792	0.000154165391173389	0.000127669264071462	0.000173003373165158	0.000147816911768643	0.000139478821321343	0.00013815440172884	0.000104442582157014	0.000128509855616811	0.000113674188593046	0.00013711928705234
pos_1891	0.000279503929559622	0.000105102869113957	0.000129593595841726	0.000115424855369849	0.000150593835817696	0.000132596651952638	0.000124516143924237	0.000122264269026927	9.17019414097382e-05	0.000112783601138514	9.68991924865246e-05	0.000120778604176657
pos_2288	0.000477142137136997	0.000191357854355168	0.000229847379754405	0.000208694872469638	0.000259147245654343	0.000231229563295129	0.000218960294669881	0.00021461256458898	0.000172258797673973	0.000202646863121751	0.000184367704214032	0.000209786096477222
pos_1468	9.60217590147377e-06	4.72139950253401e-06	5.47798543949841e-06	5.27248117713613e-06	5.38919147097482e-06	5.29220971118143e-06	5.019325573828e-06	5.34026852259473e-06	4.66904378281165e-06	4.89166009573375e-06	4.28652942458864e-06	5.17301695293223e-06
pos_925	0.00106062511297169	0.000436660226303493	0.000522994347748071	0.000508205597970794	0.000569140623819115	0.000534929424531801	0.000514633771449375	0.000534427474394045	0.000390449703237286	0.000467981732295529	0.000465144722811589	0.00054529572626116
pos_592	0.00043398476715908	0.0002351280547972	0.000249298446540875	0.00023832508361828	0.000312447128956717	0.000259344194123542	0.000271924125186231	0.000258504138049664	0.000213359872773926	0.000248069146890046	0.00022974756228096	0.000259092666242395
pos_718	0.000648971754774824	0.000332174176322878	0.000363289969199097	0.000339972352754739	0.000424102537838008	0.000405631209734839	0.000369163915838674	0.000374044490070176	0.000315901011370951	0.000372453497071595	0.000324831662779552	0.000387819746237461
pos_549	0.0031941530644539	0.00181488810019306	0.00192514220007985	0.00178297125044236	0.00218513992816184	0.00207532949287492	0.0020210930748109	0.00194772948154918	0.0016000451323228	0.00198009286155382	0.00174804780127426	0.00200804197087076
pos_889	0.00463348656644667	0.00263759961276178	0.00277064404127384	0.00259033589639858	0.00312880856309926	0.002979530660571	0.00294479356636967	0.00277493551456171	0.00231012360576558	0.0028442041920204	0.00257969754618833	0.00296662213434131
pos_333	0.00812769576346074	0.00292440914013126	0.00389913866487585	0.00328275615814251	0.00406032435767216	0.004061997050846	0.00376283583362314	0.0041477567821256	0.00252970335727539	0.00326986642360162	0.00378367856611616	0.00321572271353903
pos_2459	0.000287552783881547	0.000141526420758727	0.000146447853932501	0.000135285584246468	0.000145989171933206	0.000143165779800958	0.000152062666177559	0.000135073176667039	0.000121579057384733	0.00014328367142036	0.000129493608833978	0.000134864757929873
pos_1000	0.000923806234985915	0.000463087908401238	0.000476206062915908	0.000435062366240488	0.000509510990697741	0.000493218711631254	0.000487006349781475	0.000467326727086756	0.00040159160998322	0.000460741887322162	0.000410119036086324	0.000474187485748591
pos_1795	0.000418816485934457	0.000227843116370226	0.000229724197844223	0.000217691502014069	0.000247448646251824	0.000248416480630155	0.000231205655864724	0.00022532144693185	0.000207981192812023	0.000227048133760822	0.000202863056074225	0.000229773566736774
pos_1330	0.000460556499509836	0.000191307418356675	0.000207444634495452	0.000177143033636242	0.000236019582605146	0.000211593462989187	0.000198317396286914	0.000192064421838601	0.000171249526430633	0.000193173244676762	0.000178377954977959	0.000184410961591127
pos_2748	0.000199016122636585	6.92700712122589e-05	7.97612269549017e-05	7.12720412177511e-05	8.96157906194326e-05	8.03539700324436e-05	7.31820373014219e-05	7.85893589512968e-05	5.92099378360171e-05	8.02358092420645e-05	6.50569490480825e-05	7.50878903814561e-05
pos_908	0.000122951238998922	3.71053896976696e-05	4.51198927959147e-05	4.05102190980289e-05	5.32386543113412e-05	4.77829878508764e-05	4.3353712140447e-05	4.21683443462283e-05	3.31056862012655e-05	4.16500955965405e-05	3.65150327956295e-05	4.43334257959915e-05
pos_1207	0.0378001120221765	0.0164226100707242	0.0188551984654582	0.0165624036232202	0.020713899892171	0.0198098868938308	0.0180980567695413	0.0178380463850451	0.0139827933719229	0.0185195088653322	0.0159910134296621	0.0176888317465008
pos_1029	0.00170900231310066	0.000917489045291512	0.000973241299536761	0.000866043233923529	0.00107903433341381	0.00102815469571858	0.000979933634195125	0.000960731683482896	0.000781236859343664	0.00100207129344455	0.000883812339359156	0.000951781571227786
pos_1423	0.000451645536934755	0.000239086105730576	0.000258291427474514	0.000227181418422569	0.000283908063983365	0.000271430259227628	0.000254363297639658	0.000250487190971992	0.000199709308635109	0.000253225245247888	0.000223612594032521	0.000248414064673109
pos_717	1.79739684975258e-05	9.40509493768574e-06	1.00152169485193e-05	9.59001808141937e-06	1.14807191725708e-05	1.03524220651463e-05	1.04812792847763e-05	1.02620316628006e-05	8.06478542243687e-06	1.03284011445848e-05	9.47805022130115e-06	1.02115789260133e-05
pos_696	0.00024931827957502	0.000144620904310643	0.000148092771306099	0.000138837116183191	0.000161944758805904	0.000151905489483268	0.000151581498908401	0.000143975682904465	0.000117626458336973	0.000150100862606852	0.000133431154570173	0.000148134406904711
pos_1506	0.000939847354119013	0.000544039790372981	0.000561602080917343	0.00052343245699527	0.000613898926810313	0.000582349583590377	0.000575850963290809	0.00055736473345237	0.00045764104574574	0.000580825702693234	0.000520244460306078	0.000558770061883352
pos_21	0.00105411749482465	0.000597895813806859	0.000626212319569453	0.000586436785228363	0.000688256972240652	0.000644055189225656	0.00063951556347853	0.000613857899992435	0.000513948243827696	0.000632422065748278	0.000568840091111107	0.000626751668517456
pos_976	0.0106995147871808	0.00411522283135404	0.00496229662000229	0.00431981308668291	0.00530286165686184	0.00510709899826235	0.00455382766341752	0.00468392894350906	0.00351256978687009	0.0045334128521402	0.0038934144835909	0.00457688137612614
pos_1105	0.00802894209949478	0.00306693255619533	0.00361473611207225	0.00306515257830478	0.00388364126982978	0.00360471379228895	0.00329642526713872	0.00331253585764484	0.00234284006369174	0.00317942922297111	0.00283654525033538	0.0032705274509047
pos_634	0.00810451793319367	0.00299173952634722	0.00359534414611747	0.00306813373471041	0.00383511529288801	0.00358402455758492	0.00323318134013391	0.00325000027661451	0.00250376296829646	0.00308340553243032	0.00284185025065871	0.00319225873574181
pos_1316	0.00814858214442947	0.00296824087484921	0.0037340099923378	0.00322260473126622	0.00401301564950852	0.00374999204560251	0.00347163469339546	0.00352531118540033	0.00255114294921671	0.00335976075546833	0.00297369924001983	0.00352455074223971
pos_2378	0.00513606779463539	0.00187626227242738	0.0023186961491191	0.00205127826289518	0.00257873706832193	0.00237294897396803	0.00223227462516075	0.00225267253222958	0.00159562105571703	0.00209171336865072	0.00190914668504251	0.00228069014500702
pos_1373	0.00314695761816335	0.00106490295244397	0.001416330214597	0.00115359698737976	0.00149500608188409	0.00136124006851067	0.00122371177250459	0.00124429627225821	0.000865466511225282	0.00119557500250566	0.0010132594593653	0.00120184367435356
pos_1498	0.00154321226296999	0.000502798033225409	0.000691663290622983	0.000575049524256641	0.000746646572911972	0.00066024590127428	0.000616933118365105	0.00061983064441119	0.000432273652509745	0.000585960900992651	0.00048198643366335	0.000588275225379627
pos_2758	0.000603369935150405	0.000284393283487294	0.000299471220902603	0.000274755597720049	0.000324042764401641	0.00032582743718205	0.000284051910719001	0.000308106895232031	0.000226684618876298	0.000288453867764072	0.000258534293119845	0.000275766430676921
pos_1503	0.00160107828365188	0.000728358511860144	0.000782071701454471	0.000717713827677062	0.00087105767926529	0.000831871557622864	0.000768402602682283	0.000782846463758418	0.000612906062581029	0.000755037212256931	0.000707001611785195	0.000760173010304113
pos_1684	0.000187942254127175	9.57895912648183e-05	0.000103004881969453	9.73832374758075e-05	0.000111394863164749	0.000108643877830416	0.000103129198244543	0.000105154847311524	8.37881970874973e-05	9.95144019664621e-05	9.54573529234897e-05	0.000101604695491652
pos_2030	3.6940464268118e-06	7.7612101979924e-07	5.09355002547179e-07	7.83640937953249e-07	1.77876742797446e-06	1.30228077721326e-06	4.75740746386008e-07	1.16349348193964e-06	0	4.58614839007376e-07	0	0
pos_500	0.000401096927137529	0.000267260425385752	0.000238522863033748	0.000261092923801465	0.000281101856364037	0.000273710451593784	0.00025916617306818	0.000268225947606608	0.000230104831865457	0.000264849582963216	0.000232328961711273	0.000237167278858166
pos_2323	4.94543728959299e-05	2.02414701750751e-05	2.61009629617459e-05	2.27175192634809e-05	3.13613974739281e-05	3.00745278495348e-05	1.93624534080314e-05	2.81154745362542e-05	1.66665220211971e-05	2.0857663080981e-05	1.57896681574002e-05	2.51377002847597e-05
pos_658	3.44966765344169e-05	1.75545541269262e-05	2.09712454916153e-05	1.91987341192284e-05	2.2906721300896e-05	2.040076541143e-05	1.5322809257404e-05	1.74849013677538e-05	1.36177959683263e-05	1.57592687037796e-05	9.91758262384742e-06	1.886341885005e-05
pos_2268	0.000499538648191211	0.000365689487396892	0.000367260736442171	0.000348830469629106	0.000423876596103354	0.000378794666104633	0.000350140282096546	0.000348214236509751	0.000306356998774828	0.000356394815787741	0.000267341821736112	0.000335267084395012
pos_2314	0.00139714716215196	0.000850795641605517	0.00101601875701667	0.000855828051546889	0.00105990256888942	0.00100098461253023	0.000822080489057872	0.000869506232717264	0.000651147324170038	0.000911158518294922	0.000604639031589556	0.000821093279098784
pos_2849	4.57191061431665e-05	3.27646282094408e-05	3.39016443988473e-05	3.24402995721455e-05	3.42264745284002e-05	3.50875549470376e-05	3.29152804930515e-05	3.25007766532936e-05	2.71272873591861e-05	3.39375196049308e-05	2.7563981531705e-05	3.32725088779764e-05
pos_794	2.0624122974569e-05	1.46379570615423e-05	1.55945931870363e-05	1.36312807290962e-05	1.564923094553e-05	1.57580525824399e-05	1.43959360626442e-05	1.42672130325977e-05	1.06239099973428e-05	1.45437546726915e-05	1.10338078495372e-05	1.41193864939848e-05
pos_1286	4.26901354056363e-05	1.74527944164384e-05	2.61039086955695e-05	1.87617864248305e-05	2.78860717235945e-05	2.42298041878089e-05	2.05436992850005e-05	1.79847804410333e-05	9.04711991661521e-06	1.83224423560462e-05	1.20111010406428e-05	2.0358168331753e-05
pos_1590	7.35008909937239e-05	4.30822588590672e-05	5.3054400642062e-05	4.14271827572827e-05	5.58784924871053e-05	4.982869749553e-05	4.58752345517965e-05	4.33828638600441e-05	3.20820776024331e-05	4.26541026528532e-05	3.25275798175808e-05	4.19381133903216e-05
pos_1648	0.000100620959773235	5.37207217997651e-05	6.47860650972345e-05	5.59812067694381e-05	6.95139617916968e-05	6.58723650229123e-05	6.17906091993504e-05	5.67666552057748e-05	3.89203864234746e-05	5.51498049694056e-05	3.95328431112611e-05	6.00227758342579e-05
pos_1923	0.00212536859683121	0.00116645787902525	0.00144812385075895	0.00123052739807571	0.00154681656773176	0.00144344141221121	0.00126921572116091	0.00134437672978144	0.000934181234403141	0.00121920998418896	0.000968259729594823	0.00129292138800214
pos_517	0.000233488180377192	0.000135473575047223	0.0001677711192476	0.000145978859902239	0.000179439390300078	0.000162507787935069	0.000148852080002229	0.000147819135772639	0.000117747327340169	0.000149444060608259	0.000114978328165134	0.000147786051576002
pos_1239	0.000169233132300719	9.19641506547501e-05	0.000109737777972239	8.97231374633736e-05	0.000121233551072285	0.000113494722942454	0.000102509420748998	0.000100172514318797	8.19472131736676e-05	9.64479420710925e-05	8.15113326120257e-05	0.000103303048265132
pos_1009	0.000130567132300891	6.53539738190708e-05	8.59789527535932e-05	6.42461891698447e-05	8.35168750835916e-05	8.35458509062857e-05	7.33718251360655e-05	7.24074750376975e-05	5.12001162243997e-05	6.81885946387154e-05	5.42750682991678e-05	6.30756837493085e-05
pos_1680	4.4591580881838e-05	1.8079348089892e-05	2.60853649265531e-05	2.03275646305358e-05	2.93140251514539e-05	2.70862836250048e-05	2.21963362237789e-05	2.0762318912379e-05	1.23774071286486e-05	1.95299066203794e-05	1.51709777008543e-05	1.96709230697185e-05
pos_2037	5.1331392180072e-05	3.81300684663967e-05	3.92618508627554e-05	3.61412618504793e-05	4.24435571669917e-05	3.35354411226268e-05	3.97751377256882e-05	3.84439154480777e-05	3.35889575958354e-05	3.90837182053049e-05	2.977730896402e-05	3.15130229747966e-05
pos_1208	8.11568059747142e-06	3.82331506179012e-06	5.02321649782053e-06	3.98641552458347e-06	6.43588399893152e-06	4.81251205191058e-06	4.59287671018415e-06	5.02746874715059e-06	1.52479123979369e-06	5.0220265463621e-06	3.28052832232762e-06	4.78667827729612e-06
pos_2328	5.22127375199092e-06	0	1.88489923934352e-06	7.17353857636619e-07	2.8963679894294e-06	2.41636312454555e-06	3.00682139986641e-06	2.93317016185102e-06	7.00602347172057e-07	1.92467585623698e-06	0	1.09795174024318e-06
pos_1941	1.42391152401105e-05	8.80010145045111e-06	1.2049344381399e-05	8.7479477805328e-06	1.08916283761377e-05	9.48644958076488e-06	8.94509246762977e-06	9.20903278077072e-06	7.68302404830194e-06	9.53807129229539e-06	7.01832171255975e-06	1.04933979728445e-05
pos_2566	2.16327684462331e-05	1.1566600584301e-05	1.62216353775046e-05	9.49337161779851e-06	1.57360248881672e-05	1.16377918214777e-05	1.17859386867249e-05	1.20093839524664e-05	8.0340160987918e-06	1.25684281971292e-05	7.62135251938309e-06	1.59737457764242e-05
pos_1300	0.000516177259545004	0.000307650675408676	0.000355979416085232	0.000283728953774324	0.000381544960738237	0.000312988965324206	0.000327626993588758	0.000332283104344526	0.000252684547149847	0.000307203140802959	0.000254183040458891	0.000336292210379265
pos_564	8.0452263493735e-06	4.70216381382907e-06	4.82470785084129e-06	3.45625263939187e-06	5.34092927433689e-06	4.1910691790661e-06	4.30143446398852e-06	4.09764988094088e-06	2.82729486949469e-06	3.61266657037324e-06	2.28085894191934e-06	3.94775072765851e-06
pos_816	1.44114819032603e-05	6.10711937539558e-06	8.83980367078559e-06	5.55735253438049e-06	8.45360375498761e-06	6.92389937045398e-06	6.69499963705981e-06	6.28168330160551e-06	5.49185118671047e-06	6.30497975284693e-06	4.46190293266386e-06	6.37618195740471e-06
pos_2063	9.04293940608713e-05	4.76778048249175e-05	5.99936587291881e-05	3.34282779351259e-05	5.27885872311615e-05	4.40402583685099e-05	4.22735872962839e-05	4.24820106509573e-05	3.20372044479293e-05	3.92975816984424e-05	2.72716744445753e-05	5.16764361328121e-05
pos_2283	1.76710638055784e-05	1.04077311584894e-05	1.14045190594602e-05	6.91158317343185e-06	1.04957828442529e-05	9.09010493911645e-06	9.23438270976285e-06	9.09828003335829e-06	7.27794845902033e-06	9.74627580387215e-06	6.12961937270168e-06	9.63962350314723e-06
pos_1862	0.000195685648717073	0.000115280054291874	0.00012463692319795	0.000120539980208193	0.000152082456062925	0.000137238802980992	0.000136267743164824	0.000117928206878564	9.94459823802204e-05	0.00015008577301288	0.000111975710103413	0.000140903826509261
pos_2715	9.66651572225508e-05	6.08856888011354e-05	6.6490141213859e-05	6.37695235503733e-05	7.58191600355696e-05	7.25816153525943e-05	6.77465592487378e-05	6.02205330808928e-05	5.77457908019314e-05	8.43017245480291e-05	5.69026402383616e-05	6.74474997745636e-05
pos_1364	8.73342581337702e-05	5.19874603002746e-05	5.1263371577389e-05	4.32251125060748e-05	5.18063183053235e-05	5.79595569979693e-05	5.04276587871877e-05	4.45671124362657e-05	5.04620943632213e-05	5.00512201598686e-05	3.64068191130312e-05	5.39535575346622e-05
pos_1982	8.28317349717533e-05	6.73308691190149e-05	7.07617929876374e-05	6.73663053307542e-05	7.11671472991338e-05	6.81607603479972e-05	6.84265529873736e-05	6.45210381763395e-05	6.77323968423533e-05	7.15918627957332e-05	5.73595863972568e-05	6.75669987318749e-05
pos_1796	0.00226004631086865	0.000988975842833614	0.00206272619273655	0.00161813789600939	0.00193269732428273	0.00188678680629111	0.00161043605617688	0.00174263572632141	0.0014578220095188	0.00180586055358262	0.00155640539628691	0.00171647482642371
pos_2028	7.698929085696e-05	4.78856893434318e-05	6.28384158689512e-05	5.52039263449388e-05	5.83327114803625e-05	5.90986862356818e-05	5.44330468445111e-05	5.58173815124941e-05	5.21192178731915e-05	6.02326075396744e-05	5.37889452665826e-05	5.71272349803784e-05
pos_2259	5.78653665607303e-06	1.60430223035918e-06	4.06449023736927e-06	3.10373563836443e-06	2.63350090398143e-06	2.94122785322238e-06	3.06916659596771e-06	2.35887939090187e-06	1.68925593831867e-06	3.7715219414937e-06	3.19927936980768e-06	2.7560125188851e-06
pos_1619	5.47525504728951e-06	7.81402419860919e-08	2.92375407808484e-06	1.4242817037816e-06	3.09674757754416e-06	1.67764641876979e-06	2.45883804999262e-06	1.25534951049541e-06	1.22792305766584e-06	1.16141578616859e-06	1.07197648392311e-06	2.4840527512071e-06
pos_2591	2.26012957598124e-05	7.54206782434312e-06	1.52688465808484e-05	7.62819643636935e-06	1.73624579953366e-05	1.32627086995405e-05	1.34109809852893e-05	1.07521052954862e-05	8.87384291884018e-06	8.18101966910037e-06	1.29345317030223e-05	1.25024947875429e-05
pos_1201	2.49406551559252e-05	1.16105382223053e-06	9.83263340990301e-06	1.8140348010319e-06	1.14496850704128e-05	8.12634167804689e-06	8.89919146711319e-06	5.05142442534705e-06	8.6627879199415e-07	2.1251823969744e-06	1.36651848285784e-06	5.43970853663058e-06
pos_1312	1.66947190811225e-05	1.05881210588029e-06	9.01294083674315e-06	5.45487601429261e-06	8.26362612441436e-06	7.1774265957978e-06	6.75096009497921e-06	4.9491536723369e-06	1.59936902347235e-06	2.33896454727637e-06	2.28750088019599e-06	3.80475227353352e-06
pos_2416	6.25859549010847e-06	0	3.42889188946298e-06	1.4792734889386e-06	3.25520687532569e-06	2.83591669939626e-06	1.76385467177361e-06	2.7792392174194e-06	6.03243766281136e-07	1.13320316424919e-06	7.79459827912168e-07	1.82580186988464e-06
pos_1227	1.06856288332028e-05	1.71666484385848e-06	5.77012854597569e-06	3.2821512736514e-06	4.94650955083144e-06	5.26667509018376e-06	3.87507241039423e-06	3.98962960217833e-06	8.55877555583779e-07	2.47527174518631e-06	2.61211180807269e-06	4.45883495507905e-06
pos_2073	0.000133156917835779	3.4148078698522e-05	8.10178868922871e-05	5.35881518392386e-05	7.81119724274646e-05	7.54680988695566e-05	5.96706539902742e-05	5.5908031227056e-05	2.57640380346644e-05	4.21353730301057e-05	3.68929876400151e-05	5.88412550178107e-05
pos_2412	8.36034418547715e-05	1.49647892874268e-05	5.32685663320589e-05	2.84942925204119e-05	4.13263349391777e-05	4.62995138495669e-05	3.0599681297352e-05	3.36344785305833e-05	9.1696357000602e-06	2.15551949969199e-05	1.68133169421209e-05	2.91249392596495e-05
pos_1137	0.000116418634861374	1.98794122218047e-05	6.97442521018488e-05	3.94197160017706e-05	5.83592612988263e-05	7.29398998724739e-05	4.24907457432618e-05	4.48043131147436e-05	2.51049798328565e-05	3.8473049213513e-05	2.49497297635004e-05	3.78692521300802e-05
pos_1777	9.0932478072819e-05	7.37021277532856e-06	5.05787587224109e-05	1.85565994205018e-05	3.81001427921116e-05	5.05751465918503e-05	3.66149570509109e-05	2.52406759868839e-05	1.03931652792132e-05	1.4690038309292e-05	1.28989599626927e-05	2.42092461701424e-05
pos_2564	4.14677943783303e-05	2.23426277468754e-06	2.36253759964185e-05	1.08983115699546e-05	1.73427031066853e-05	1.88244886856501e-05	1.32396692612446e-05	1.37971607032426e-05	4.69474357072721e-06	7.49329937851211e-06	7.21659339893269e-06	1.00853646729404e-05
pos_223	0.000127815415165859	2.28606097201211e-05	7.86281700753341e-05	4.52309887840684e-05	6.02332237407424e-05	7.07173277793271e-05	5.17108680387223e-05	4.23660933791002e-05	2.46250149834989e-05	3.37072642059093e-05	3.10073322926886e-05	5.00568025478097e-05
pos_2768	6.11942663656145e-05	3.19835828753534e-06	3.49465768103949e-05	1.31712914278152e-05	2.19142343231384e-05	2.84114057402356e-05	2.0294589505273e-05	1.5937865869504e-05	4.46499094796542e-06	9.52696460063664e-06	7.59244005962561e-06	1.46006727136729e-05
pos_1194	9.47372036539313e-05	2.09013595582538e-05	4.90033873844317e-05	3.44207169622916e-05	4.82276989306768e-05	5.05083582002249e-05	3.89726485320359e-05	3.75874967197057e-05	1.91717627562723e-05	2.87549541575747e-05	2.33542062997844e-05	3.65917280815506e-05
pos_551	0.000132997958893343	4.15612359665249e-05	7.50790291831682e-05	5.70789216723577e-05	7.05434420372366e-05	7.50463335968072e-05	6.26506049960872e-05	5.97925090991556e-05	3.5367025765108e-05	5.12180631807778e-05	3.79475146232993e-05	5.75268679457813e-05
pos_2006	8.46669495162335e-05	2.03539328809116e-05	4.49554937462443e-05	3.07483149747966e-05	4.16846387029298e-05	4.16105254758126e-05	3.76275325622231e-05	3.24375980914811e-05	1.68251107283127e-05	2.80395581913384e-05	2.22558135998886e-05	3.43797445287112e-05
pos_1760	0.000120135182165868	3.1269855415353e-05	6.44334322020317e-05	4.14673888753594e-05	5.63109472083788e-05	6.09186349871659e-05	5.06099153446408e-05	4.6352226559145e-05	2.38873785772441e-05	3.87095732925807e-05	3.26961512607324e-05	4.67481916997024e-05
pos_2236	0.000318281124348581	4.14625400692242e-05	0.000149980311933155	8.68003454148528e-05	0.000126706318038475	0.000142174700680304	0.000109803223737999	0.000101280037798484	3.37894617472304e-05	6.89691848080913e-05	5.0474726628569e-05	8.82672968302838e-05
pos_802	0.000196594603105606	4.72389342461669e-05	0.000107413970992254	7.26255036727867e-05	9.41610224731319e-05	0.000102733820994722	8.26241305921812e-05	7.83566203450096e-05	3.63379868805037e-05	6.00090790535083e-05	5.42374819273774e-05	7.19057962472423e-05
pos_527	0.000201491614933826	7.37624668225895e-05	0.000122276137639992	8.94149653817825e-05	0.000105402263363246	0.000115270680379387	0.000101652377536013	9.32609458071116e-05	5.78195178699991e-05	8.15878755188426e-05	6.35906791326212e-05	9.59993043726363e-05
pos_2266	7.72579374135352e-05	2.03867612361379e-05	4.45814601158141e-05	3.20204817162651e-05	3.86118207098505e-05	3.86777422889931e-05	3.09876530403073e-05	2.98033748266212e-05	1.70181886892564e-05	2.41010550295429e-05	1.69103499203632e-05	2.88407561340213e-05
pos_936	0.000207128580771505	2.73524553827355e-05	9.863944672972e-05	5.97539142036239e-05	7.51774209675511e-05	8.48819239070431e-05	6.25764566399719e-05	6.31847350426022e-05	1.29380634655431e-05	3.24436186076612e-05	2.0925291741388e-05	4.94330812196763e-05
pos_1952	0.000139572638926339	1.8568234338175e-05	6.68194710878924e-05	3.61952837833301e-05	5.29615481034754e-05	5.90429535002912e-05	4.07839377315685e-05	3.64836325056442e-05	1.18962902095494e-05	3.08347111556299e-05	2.82907047304351e-05	3.38777470906418e-05
pos_1729	0.000460477975257688	5.46566999187526e-05	0.000223832341738389	0.000121813176400878	0.000168234704179892	0.000208239074909163	0.000141350675403352	0.000139212526585238	5.37244571722479e-05	9.72705314080921e-05	7.78775591480883e-05	0.000109209432930639
pos_2265	0.000209019293523944	1.19477014631416e-05	9.70790022465385e-05	4.08922205977758e-05	7.17262306601632e-05	8.29577447504533e-05	5.69570898553608e-05	4.74192805902293e-05	1.07475350682081e-05	2.63585364624761e-05	1.92026406152446e-05	3.81657330516871e-05
pos_2351	0.000337916831424007	4.25679149155903e-05	0.000174692007944035	8.07256190468395e-05	0.000133572989120873	0.000155355645661895	0.000107913224712251	9.67716512236521e-05	3.60530661311422e-05	7.08176236535908e-05	5.28686468853729e-05	8.53742877136671e-05
pos_1783	0.000279038533354788	4.85598159836186e-05	0.000128811357768203	6.44547135769943e-05	0.000105552879951898	0.000118444148482162	8.17071782631454e-05	6.91592821456209e-05	3.11866272568979e-05	5.92095244190923e-05	3.83641578176847e-05	6.30209955801619e-05
pos_771	0.000597180387317255	0.000190299756175465	0.000333786732796369	0.000221471580518869	0.000297841531440315	0.000326233174865176	0.000274343210058319	0.000249088434692633	0.000137331564233429	0.000201337772593057	0.000162137231524305	0.000218484946349651
pos_918	0.00057775245884409	0.000193863542758639	0.000322849981981537	0.000221708232706912	0.000280777535459518	0.00031489411913289	0.000247279785443678	0.000250283274541604	0.000140829832266711	0.000210088856565372	0.000158533120144795	0.000220186192520741
pos_2589	9.41142854784056e-05	1.52082480562499e-05	4.87365359187478e-05	3.32216898319554e-05	4.14173342817697e-05	4.58530395613078e-05	2.79668595324117e-05	2.62806084618215e-05	1.3027442863834e-05	2.43657194461659e-05	1.81207063093703e-05	2.6921320802051e-05
pos_545	8.511028404738e-05	1.4920103013366e-05	4.39509621917918e-05	3.22064198783124e-05	4.05706478903409e-05	4.49464777215766e-05	3.55000840222893e-05	2.95965823866339e-05	1.60921607238424e-05	2.63231044376817e-05	1.98004429371739e-05	2.95949976086896e-05
pos_1968	0.000257659521947679	8.16921237193912e-05	0.000161856603493227	0.000122669887664943	0.00015249999499527	0.000156040385841142	0.000121616682276594	0.000121483675733468	7.10641626073898e-05	0.000102720491407836	7.58465850052795e-05	0.000119369448459336
pos_2477	0.00014569153581729	3.50872149892967e-05	8.20475324509619e-05	5.8223934837991e-05	7.7714831546005e-05	7.98933164677473e-05	6.1682536751159e-05	6.15119519440773e-05	2.78603779988715e-05	4.55326579973453e-05	3.64804255094643e-05	5.54674481970003e-05
pos_2544	0.000148323213513991	3.49660332603153e-05	8.8464367229339e-05	6.02737511665428e-05	8.12542723078489e-05	8.47518414606377e-05	6.41843200765479e-05	6.40541319796577e-05	3.1374432417564e-05	4.88983022708435e-05	3.93837155010981e-05	5.96495666525213e-05
pos_2000	0.000112389497782664	1.85287041681391e-05	5.51973963160254e-05	4.11537765768377e-05	5.17666066482598e-05	5.65383778391407e-05	3.98285543821531e-05	3.94288700139346e-05	1.25182295956814e-05	2.67854000629036e-05	1.80554080601689e-05	3.29461295460752e-05
pos_2648	0.00012121445642916	3.01233760572171e-05	6.74192299744451e-05	4.89124583990786e-05	6.42901611577918e-05	6.33159910017021e-05	5.11391469502951e-05	4.69455500343075e-05	2.52107709618003e-05	3.46944124505787e-05	2.8448237795361e-05	4.55963206648234e-05
pos_1767	0.00017822576748854	9.22929767535195e-06	9.20776557211954e-05	5.56448550327602e-05	7.35067243354207e-05	8.83470418727337e-05	5.30791607347756e-05	5.68290887864712e-05	1.09838372633736e-05	2.57936916498723e-05	2.16895833397924e-05	4.49896419985009e-05
pos_2670	0.000664383610209987	8.42160624600345e-05	0.00035157291253267	0.000211121781657081	0.000298606064765979	0.000343766010276238	0.000236395035313025	0.000232150193615406	8.81392759377841e-05	0.000157108735201252	0.000114311410172359	0.000202003724167541
pos_1057	3.57113202529351e-05	5.39616406115212e-06	1.96802930785152e-05	1.29074839303804e-05	1.85416559759462e-05	1.94792209586903e-05	1.28829022980987e-05	1.34559738238059e-05	6.76813108145168e-06	1.09811893421723e-05	7.21233539976199e-06	1.2214719856032e-05
pos_2647	4.12373283574826e-05	6.31188206326908e-06	2.39350656780255e-05	1.73773252703273e-05	2.11372401161284e-05	2.16252273483953e-05	1.57997969096102e-05	1.4344279219683e-05	7.199355451695e-06	1.13017621208025e-05	7.42789828496002e-06	1.45640758222301e-05
pos_1138	3.37406665788188e-05	5.42621412567624e-06	1.7850008927888e-05	1.06436489570425e-05	1.65510857245035e-05	1.81948714754241e-05	1.44662932352948e-05	1.22429452810956e-05	7.10115578981515e-06	1.2502424900545e-05	8.85400566269635e-06	1.26799818235e-05
pos_2693	0.000144972494973305	5.59483255585217e-05	8.87327611835317e-05	6.86673626307741e-05	8.8240456911477e-05	8.83894693141225e-05	7.90008126640935e-05	7.11942812989598e-05	4.66540583499442e-05	6.33512657026564e-05	5.36517112903416e-05	6.49598064122128e-05
pos_1226	0.000202744528461997	5.30335711597023e-05	0.000113511631796722	7.28238024527418e-05	9.97647295786356e-05	0.000106607764333562	8.38144433249028e-05	7.90986978772711e-05	4.29135181213593e-05	6.27210466527866e-05	4.41139432231638e-05	7.20415973555153e-05
pos_1038	0.000270981688950648	8.45945156076044e-05	0.000158932039942592	0.000110439929644604	0.000147291553558647	0.000159941548848687	0.00012309667651938	0.000119619409770769	6.45977245453701e-05	9.83127705511557e-05	7.4616203637102e-05	0.000109928612167097
pos_942	0.000313939687389906	0.000128562858458419	0.000201899704401772	0.000152042070930462	0.000193962447018897	0.000203612424979762	0.000170916228455742	0.000166149378736242	0.000111397873168059	0.000146835419902528	0.000115935978282943	0.000154184913929182
pos_1843	4.22964510294169e-05	5.25493629615794e-06	2.12678035242103e-05	1.31906186550595e-05	1.87760424050133e-05	1.83244679028179e-05	1.56910248798796e-05	1.47764532728295e-05	4.48744799518083e-06	1.11201167038703e-05	5.48686405123823e-06	1.08913563313027e-05
pos_1907	0.000125055143019783	3.53104599891683e-05	7.58997668875713e-05	4.84920113849488e-05	7.05046535778113e-05	7.1130594358771e-05	6.23363034920216e-05	5.86937742520264e-05	2.83571267390091e-05	5.07468841702161e-05	3.54029029639712e-05	5.18316757536237e-05
pos_1500	0.00033124020237564	8.67547420488175e-05	0.000188776285416121	0.000129961853244618	0.000168997444165292	0.000190774859724975	0.000150224454754005	0.000145030862158755	7.83341752839285e-05	0.000109718832698371	9.48328940475704e-05	0.000136575790919278
pos_2369	0.000478887526606532	6.30050228395459e-05	0.000235877132799705	0.000119091973789305	0.000192910169064795	0.000236941231378488	0.000163515942806562	0.000159035490557299	5.20300948479404e-05	9.7046421901332e-05	7.22474451112687e-05	0.000130768840886889
pos_972	0.000603219554386427	0.00017910147437315	0.000347675431352025	0.000239876691119851	0.000307755408138405	0.000345615891136754	0.00027221279325855	0.000262442866394062	0.000156679481591236	0.000215725302416793	0.000184618144691838	0.000243166564798555
pos_2469	0.000166607106658045	1.12302425206619e-05	8.13593033053848e-05	4.01747451175141e-05	6.32076083348043e-05	6.86912851220908e-05	5.28297265421099e-05	4.72941896952058e-05	1.00442097790371e-05	2.05198260776519e-05	1.31312111964694e-05	3.9028138720378e-05
pos_2637	0.000307847318545635	2.83102297684623e-05	0.000148216273471311	7.71592501840565e-05	0.000123446652809637	0.000131848498036633	0.000105132297792452	8.6170557086701e-05	2.46489787782118e-05	5.13008155351633e-05	3.87709221694153e-05	7.67465628904586e-05
pos_1268	0.000356204075269974	4.7764238476627e-05	0.000190579970578576	0.000106539391291202	0.000150480213698157	0.000176271335100537	0.000124860235824254	0.00012138861774631	4.54494311437554e-05	7.05654657990971e-05	6.16391443414938e-05	0.000104461596420196
pos_1808	0.000242167546551452	4.06366632505115e-05	0.000133725997690077	7.25938140987641e-05	0.0001049441200001	0.000117093150902544	8.70235082674327e-05	8.13939101896643e-05	2.7176086751944e-05	5.31203500542044e-05	4.14686479909091e-05	7.29389995668773e-05
pos_2281	0.000411153390841209	8.60504338370998e-05	0.000232756044162218	0.00014850259136256	0.000192851758132416	0.000219152441352522	0.000167965949334359	0.000159751352134288	6.09038771958646e-05	0.000127340121308452	9.48111938199012e-05	0.000135816988830162
pos_1687	0.000437731545525791	0.000114628770298697	0.00025228018743299	0.000169345726503481	0.000223339341124301	0.000238796969327646	0.000192577602570266	0.000183365425870375	0.000102612008076234	0.00015085698691146	0.000123793442606082	0.000166726001423726
pos_1953	0.000326292128761341	6.53499891525992e-05	0.000181763338278337	0.000115040750995332	0.000158149570939544	0.000169994069194221	0.000132644296507808	0.00012522003591469	5.89170405246448e-05	9.45477203652707e-05	7.08791096731433e-05	0.000113468358878611
pos_1406	0.0005358755494294	0.000140999727690652	0.00030954156176188	0.000203187045691415	0.000271852027999197	0.000308184013517262	0.000229324236629694	0.000229977543762353	0.00011535507795624	0.000186558771701023	0.000143050680553857	0.00021073361013034
pos_1109	0.000467780380003551	0.000120557581392474	0.000264111947792101	0.000178885282087988	0.000236394691762213	0.000270202750779115	0.0002118110683788	0.000194759842382242	9.94234514465586e-05	0.000155729816269607	0.000121793393565843	0.000175242116450201
pos_1832	0.00050808026209082	0.000127920664697351	0.000297363345055639	0.000191393761602523	0.000259367486948867	0.000291433332294566	0.00022444273124541	0.000210251631997905	0.000109712733953596	0.000167181041063151	0.000133359215381043	0.000194339433143153
pos_1401	0.000477937932386951	0.000137791279467944	0.000273894889113452	0.000186546092693689	0.000247602494008394	0.000279135031140794	0.000220925308016467	0.000211566494969743	0.000118271482628789	0.000182818189914009	0.000154675202051936	0.000200963490140788
pos_1912	0.000403893034863225	9.97300755453373e-05	0.000233419186266953	0.000155867953299674	0.000206801254025396	0.000235571982419755	0.000186213003935038	0.000175029618031978	8.97063878801197e-05	0.00015019005574806	0.000121432305972942	0.000162786888003209
pos_1672	0.000291185389947436	6.33061966217912e-05	0.000164696527168898	9.73983809162574e-05	0.000134494442137282	0.000157700784083215	0.000120773532901511	0.000113697520208945	5.2854109670935e-05	8.78929733670662e-05	7.16307028178639e-05	9.55453264033622e-05
pos_666	0.000191747896162005	3.90011143649703e-05	0.000104396381168974	6.07016274045588e-05	9.03969558075347e-05	9.92603891493601e-05	8.01154241499319e-05	7.37180628446925e-05	3.51492144351073e-05	5.98987696486692e-05	4.69658995102017e-05	6.40612046460785e-05
pos_2042	0.000161432469347719	2.83157723003242e-05	8.89290756526726e-05	4.84126659042938e-05	7.18389798997861e-05	8.88733330769181e-05	6.63508864297722e-05	5.76153162720302e-05	1.68679118945556e-05	4.55474487445532e-05	3.29244999085706e-05	5.02162290904049e-05
pos_1511	0.000452984621595739	9.049780146076e-05	0.000251093114183514	0.000150031126592963	0.000216610879937505	0.000246923347255092	0.00019577081942602	0.00018147440501759	8.33759019852527e-05	0.000138500815259053	0.000111109385859455	0.000161289454719068
pos_2301	0.000610895085012235	0.000165723680899444	0.000369024655470436	0.000233255985335782	0.000309519646069185	0.000358909731978481	0.000287045479128691	0.000271192241976539	0.000144366674056956	0.000222979812516962	0.000177435064617089	0.000248040869100187
pos_2330	0.000152812366140304	4.12982804616924e-05	9.3761076228894e-05	5.93958590431833e-05	8.15970981663545e-05	8.95794219986877e-05	7.28739470065598e-05	6.89913619874362e-05	3.46884616738934e-05	5.7309328630993e-05	4.63921377182018e-05	6.39765541654024e-05
pos_2806	0.00026442046901516	7.6803164981018e-05	0.00015914569041474	0.000104985541135283	0.000143346096778692	0.000153495790147459	0.000130712767055356	0.000119623140384522	6.37261366613894e-05	0.000102339696570157	8.20644734686307e-05	0.000108109203439431
pos_2368	0.00030403652858651	7.67169635801132e-05	0.000185346436045112	0.000123477629452332	0.000167348804343251	0.000177744750360485	0.000143660086977495	0.000137634347967197	7.07493425682574e-05	0.000107380024535701	9.20981417201493e-05	0.000125180692472058
pos_1567	0.000119561412929794	3.06131066431554e-05	7.12329626012113e-05	4.81228954097824e-05	6.47135606237066e-05	7.12030114746806e-05	5.62945285307876e-05	5.64323372307722e-05	2.75569473936721e-05	4.58868265638038e-05	3.51729142747158e-05	4.89684707958534e-05
pos_2064	0.000325094645068699	8.14575655902955e-05	0.000197548612218349	0.000127895482627963	0.000175631668759791	0.000196019096096523	0.000155213661390904	0.000155769134943931	7.46677792180597e-05	0.000118957174382697	9.69086872261136e-05	0.000133420552778767
pos_2571	0.000241285975752402	5.52560565111994e-05	0.00013919985804936	9.18116954846874e-05	0.000128666059974346	0.000137877460569218	0.000114364827351696	9.80360886618645e-05	5.15384566862644e-05	7.84329881702453e-05	6.13775493407415e-05	9.29234040390045e-05
pos_2311	0.000339128080974653	9.65118936123282e-05	0.000199983821735024	0.000134138053861604	0.00018617523193516	0.000198175593504174	0.000162154340299913	0.000148660570763368	8.28856620600628e-05	0.000121267424567265	9.74845681342615e-05	0.000144103806949667
pos_1859	0.000532816607614986	0.000137802050249471	0.000308843925864103	0.000207049766843209	0.000278530361629373	0.000303483992491548	0.000243935419697271	0.000232837033365943	0.00011905315023161	0.000185418526834008	0.000146580377165243	0.00020991619945318
pos_1743	0.000421483983737816	0.000117269754734374	0.000251252286152617	0.000172602395694812	0.000225045432326893	0.00024078451223041	0.00019870752611748	0.000184427367375585	9.97076822744594e-05	0.000155087160841657	0.000126901068408755	0.000174304974003735
pos_2719	0.000747249732989348	0.000178406792191317	0.000428583288170584	0.000282599287259573	0.000379294416008829	0.000413209531835457	0.000325499978701041	0.000311777520405938	0.000153490276212793	0.000243149621252812	0.000199896336619856	0.000295833052428477
pos_1759	0.000130551985388323	2.11722959424531e-05	6.87680769013443e-05	4.57454149670718e-05	6.61931306972448e-05	6.96039695665301e-05	3.86986719732703e-05	4.88201874703329e-05	3.4897716331555e-05	2.70285511924143e-05	2.31648938132097e-05	3.87963523228917e-05
pos_1782	2.44273669189824e-05	8.26636080585226e-06	1.46919023410909e-05	1.06784708043204e-05	1.56013634668346e-05	1.43686527299744e-05	1.05083324624279e-05	1.20451541881197e-05	8.03818541394759e-06	1.01758758165614e-05	6.24928729423117e-06	9.69331353673275e-06
pos_2752	2.0609277675357e-05	8.58325604312383e-07	7.63276912707867e-06	3.68241669867008e-06	8.82249623936538e-06	6.16551590503075e-06	4.19015090174184e-06	4.41209690089811e-06	2.04386533698554e-07	1.81490194636022e-06	1.47598399817303e-06	4.90952871583161e-06
pos_2851	0.000206981453957507	6.43436951003937e-05	0.000117421005487829	8.99301646365804e-05	0.000109497829330086	0.000108075711808795	7.86397967252522e-05	8.61513642191227e-05	5.48074684796619e-05	7.78040698146072e-05	5.68032388653147e-05	8.52479017516532e-05
pos_2067	0.000195328718777127	5.57815675812421e-05	0.000103717032218637	7.77572423184727e-05	0.000101516604298326	9.81734480328727e-05	7.91997180205692e-05	7.63949364082635e-05	4.74648604578498e-05	6.5648624809543e-05	5.04892528297315e-05	7.52522699589423e-05
pos_2297	0.000182720787055515	5.98736021545291e-05	9.68922701540365e-05	7.12330779632968e-05	9.9641246159141e-05	9.23517708819243e-05	7.12032548905456e-05	7.57393025851182e-05	5.01210357395921e-05	6.73725226493991e-05	5.14084073640743e-05	7.44592587044907e-05
pos_2358	5.54973444371038e-05	7.54297775209504e-06	2.43790312280891e-05	1.47627164884182e-05	2.26788928415443e-05	1.78118496828395e-05	1.40135487995944e-05	1.23494835230578e-05	6.19642026861756e-06	9.13224049548333e-06	5.14759103380473e-06	1.60802408436391e-05
pos_2703	2.43711611547172e-05	4.38622878927207e-06	1.25489795455036e-05	6.93583834865524e-06	1.11208189877138e-05	1.02310253912232e-05	7.27345733673055e-06	6.54544706348562e-06	3.97290601244684e-06	5.89810844651628e-06	3.69840402137593e-06	7.87259586963359e-06
pos_1647	9.21157385396969e-06	5.29076884541887e-07	4.27957049332872e-06	1.47898277579508e-06	3.20387159838713e-06	3.10469487821626e-06	2.28806570864135e-06	2.25322985379714e-06	9.65395706192268e-07	1.81197151896192e-06	4.10094324177461e-07	2.42540624836847e-06
pos_1707	1.75181705053232e-05	3.45639880913016e-06	1.07336023973126e-05	5.94035983644189e-06	8.74273734922756e-06	6.92260415647678e-06	5.48056011075394e-06	5.91860579717586e-06	3.68260678371876e-06	4.87065629908478e-06	3.24345650144179e-06	6.58262454769287e-06
pos_836	7.1516728163128e-05	7.95073117712059e-06	3.82781325001399e-05	1.59872511172483e-05	2.91847142419053e-05	2.84608095244135e-05	1.3424329537045e-05	1.94788143885522e-05	4.36404344007323e-06	1.06474572163224e-05	7.39657347857564e-06	1.7222168443421e-05
pos_1913	4.45778072659227e-05	1.26206588659166e-05	3.49643113532501e-05	1.83361507455985e-05	3.07055082640842e-05	2.7003416082868e-05	2.35458784096291e-05	2.31644860122834e-05	8.75760792785651e-06	1.6103884216685e-05	9.25099977192354e-06	2.02342464515656e-05
pos_185	0.00064373954121452	0.000315545584513917	0.000444891344226715	0.00035531993575325	0.000508576216767506	0.000423845788879487	0.000384181467096169	0.000366841992884954	0.0002390688098436	0.000307084251457447	0.000214277476444738	0.000337974722648386
pos_2437	0.00116516136008227	0.000627959449355881	0.00090745130390866	0.000796568041660228	0.000929793017013598	0.000849398183264967	0.000709517997237221	0.000736057088055064	0.00050464108761012	0.00059871126169202	0.000496081920918085	0.000687420297946113
pos_2582	2.25941324372133e-05	5.99744902977763e-06	1.32630688384619e-05	1.133635303402e-05	1.36235232455528e-05	1.19445659161415e-05	8.95449332700837e-06	7.17726619342342e-06	3.85706133474216e-06	6.52604822297348e-06	4.72419668646686e-06	8.28586861325428e-06
pos_2811	5.27222371214285e-05	2.96267681459464e-05	3.70524902751887e-05	3.34111684492552e-05	3.88982185431648e-05	3.61436853696632e-05	3.06199784855619e-05	2.73365208863729e-05	2.39919628310557e-05	2.67847307589091e-05	2.35331586594443e-05	3.18673521075915e-05
pos_1213	6.65758865645494e-05	7.55310277230213e-06	2.7035266764841e-05	1.69228323206997e-05	3.19235002208992e-05	3.20194893393443e-05	1.85366289893347e-05	1.41911726151981e-05	7.58957807217e-06	9.76800080897671e-06	1.09730462532556e-05	2.09806494500525e-05
pos_912	1.51039614252908e-05	1.16651148779743e-06	8.34811201967831e-06	2.35473981463475e-06	6.44479830475458e-06	6.97706543586291e-06	2.79461944270079e-06	1.87215309444061e-06	0	2.14554117715142e-06	1.11911039919465e-06	3.79739658087711e-06
pos_2219	0.000353901094898488	0.000161945345053921	0.000231116425011001	0.000197035281161362	0.0002537704871906	0.000247274081563488	0.000223314005801253	0.000214487406436354	0.000139427418398838	0.000199263907952587	0.000175014260303738	0.000229770046615859
pos_1341	0.00649811595198651	0.00293477443289898	0.00438688205007149	0.00356931586040785	0.00480372025142202	0.00446498034389829	0.00385208975071607	0.00379450102718991	0.00249570365767038	0.00357112643550484	0.00271437686388168	0.0040797248078488
pos_873	0.00133424896272041	0.000654339019747734	0.000910051555844573	0.000737282644397119	0.00100893124276981	0.000912869267486733	0.000820941021289473	0.000820341823507832	0.000535902407113102	0.000749399998640229	0.000604794012830411	0.000843034435811174
pos_2074	0.00447839821329078	0.00176025735604895	0.00294091895242368	0.00234971772265052	0.00314949314071176	0.00299476157360884	0.00238274884919241	0.00243316827907929	0.00146257785167283	0.00220014767724385	0.00160858386620262	0.00244179416773595
pos_1569	0.00560832226043319	0.00252651953479776	0.00372575356999332	0.00307684419515744	0.00411461275312139	0.00384294794364622	0.00311287874382986	0.00313868081558733	0.00214102112447971	0.00306148188778012	0.00228334756684678	0.00317269246559547
pos_1196	0.00406042275329915	0.00157601417443791	0.00260934140790528	0.00201911150101793	0.00277889593437475	0.0026356874584959	0.00206120868087667	0.00210499278755635	0.00127620455586174	0.00190879026492888	0.00139526583965853	0.00208677787088566
pos_1455	0.005156100627607	0.00212783895325885	0.00335436293290007	0.00264730476813082	0.00361139688880948	0.00335250719431764	0.00272336836562363	0.00269549300920425	0.0017323425869552	0.00251631728188281	0.00183007180226311	0.00272828947524702
pos_1046	0.000121914279679639	4.34258375184982e-05	7.8805713351428e-05	5.80299527459421e-05	7.84818249263588e-05	7.54037427049922e-05	6.10434689114453e-05	5.95030908565949e-05	3.55609604720819e-05	5.52443279306352e-05	4.01999203982618e-05	6.15957869410449e-05
pos_1110	0.00261119157726958	0.00119421857920501	0.00171342686552684	0.00136161529085922	0.00186587952420425	0.00170067363067146	0.00145519318562285	0.00146959423021067	0.000973760660622241	0.00138065391212545	0.0011072154675643	0.001479899465742
pos_1526	0.00318087224331394	0.00143405500368446	0.00209202872790322	0.00162155728494933	0.00225717812468318	0.002084593486621	0.00178852783212265	0.00175517548819204	0.00119438592007317	0.00167254559005677	0.00132416431835951	0.00178998331672538
pos_2088	0.00700249072092642	0.00318345192103108	0.00476117699643124	0.00377944750027391	0.00512799657231442	0.00479606313951926	0.00405992758421598	0.00399567708286313	0.00266023240105667	0.00383783730602743	0.00300133530402913	0.0041620430434135
pos_2398	0.000526232727623883	0.00022175066077204	0.000343844702729502	0.000275687910152934	0.000373882018759382	0.000363060794728724	0.00029868082698016	0.000297654972788203	0.000187980026739692	0.000275797185917896	0.000216426804663497	0.000301124093523725
pos_1646	0.000125093462258903	5.07921955399136e-05	7.54777202942564e-05	5.64819706156489e-05	7.54167387217144e-05	7.74434296426746e-05	6.28389542911405e-05	6.50453480593191e-05	3.90102319255918e-05	5.53473779009427e-05	4.5012015369398e-05	6.27936995694222e-05
pos_2787	0.000125258070052911	4.19173289281369e-05	7.34878307191109e-05	4.98681815295248e-05	7.56917538334884e-05	6.84017379616876e-05	6.24680010096138e-05	5.92093215604046e-05	2.79283390282336e-05	4.33757276921115e-05	3.53479512078808e-05	5.78254458852496e-05
pos_2432	0.000439531281894513	0.000189991539408382	0.000293803864582384	0.000268154507042323	0.000316773933116171	0.000310382272199809	0.000260575966779448	0.000256051966820447	0.000178896002123759	0.000233558241288715	0.00018032460907419	0.000259849192370962
pos_2805	5.38975660549039e-05	1.25006349802034e-05	3.2526277869219e-05	2.61206464547064e-05	3.28678561904743e-05	3.19121036214198e-05	2.17993134761355e-05	2.33796663837738e-05	9.93200601750163e-06	1.90120657892461e-05	1.24623024475815e-05	2.20258092873434e-05
pos_2821	0.000705790781640949	0.000334160648613993	0.000502159708901208	0.000378534090483606	0.000497171767563199	0.000484628340482954	0.000376278176939712	0.000386271815618004	0.000233891620129423	0.000342490328413615	0.000249800055203588	0.000393377019234836
pos_1445	0.00130947633871794	0.000540023530760108	0.00090791725863714	0.000731455414957518	0.00102428346833605	0.00091843260165972	0.000732343403528805	0.000767404725912712	0.000457489961339681	0.00063761172322785	0.000448677721101859	0.000758739382340593
pos_1512	0.00100036215617496	0.000389735106748937	0.000695383932958468	0.000511000207707165	0.000752736648895307	0.000698937648886703	0.000524128928858591	0.000556353548557317	0.000313856584173827	0.00053085630726788	0.000345306973184229	0.000542118733327973
pos_2173	0.000659504995999968	0.000277910391932362	0.000428551450506144	0.000332477143276451	0.000422524986074744	0.000433301397552204	0.000381554069263352	0.000386705713786656	0.000276184285712328	0.000314251343118731	0.00021754599993219	0.000367565738502211
pos_2651	0.000854415516490218	0.000349323941706794	0.000617066299828302	0.000442691312334165	0.00056542644263158	0.00061885582063819	0.000510128035048921	0.000440422456438852	0.000301460495074293	0.000451799011558692	0.000299952834332926	0.000505070749299198
pos_2485	4.03979117958818e-05	1.50916352474123e-05	2.39113016903609e-05	1.88868284936359e-05	3.19845291618804e-05	2.15954086571908e-05	2.10649601140344e-05	2.14732165506957e-05	1.77447071273852e-05	1.76142657016657e-05	1.50488969004533e-05	1.89380450049548e-05
pos_2455	0.000200732850001168	8.28561771527811e-05	9.70740324886366e-05	9.42505812380809e-05	0.000122387542864416	0.000103945092730392	0.000105710767927996	0.00010383978130272	8.32998119445091e-05	7.99018309864348e-05	7.71109366071558e-05	0.000102320329439656
pos_2470	2.4253872399052e-06	0	3.6549941466311e-07	0	1.06046668826873e-06	3.22793957149293e-07	2.39356216464499e-07	2.63706613226206e-07	0	0	0	0
pos_2585	0.000166443714974721	7.99073789422112e-05	0.000102194454473522	8.0200945927218e-05	9.3410958740943e-05	0.000107133162876969	8.24550612726146e-05	7.99836441054371e-05	6.69602040710461e-05	6.34862496627339e-05	5.37701216634469e-05	7.22520443827848e-05
pos_1915	6.38221313054648e-05	1.57963597609369e-05	3.06569246034305e-05	1.19628483564284e-05	2.1797171804062e-05	2.83017395418819e-05	1.47873848898957e-05	1.34299124446631e-05	6.36254267756249e-06	1.49972726156039e-05	6.86080281406071e-06	1.41644890293342e-05
pos_1078	0.000429671630750674	0.000170526039036574	0.00022735378676196	0.000153978294013791	0.000195742395904942	0.000218982469080407	0.000167556552895359	0.000157237068157553	8.59901306632165e-05	0.000130972138286168	0.000110252243989198	0.000142924880564021
pos_249	0.000126113635219666	6.54275216599904e-05	8.14425018552405e-05	6.13263117394739e-05	7.6253665402619e-05	7.58179502386204e-05	6.58412736866386e-05	6.48099166669467e-05	4.83188232344704e-05	5.96017569298189e-05	4.85418462552588e-05	6.02772172134717e-05
pos_2140	0.00384355133372948	0.00125134326121691	0.00181657510079009	0.00128568178466339	0.00179689299790782	0.00173154489546523	0.00143754562394017	0.00138615224030422	0.000954311732549616	0.00131652692057349	0.00113316411089878	0.00133376205657581
pos_699	0.000178010354432722	6.28322576861326e-05	8.08642651518676e-05	5.11784072117459e-05	7.11610532857773e-05	8.11735780600598e-05	5.63607921813139e-05	4.83839525978219e-05	2.52017915023168e-05	4.87668428129021e-05	4.64600121153038e-05	5.31549707155666e-05
pos_2356	3.95913933302946e-05	1.19362618491995e-06	1.43255559312781e-05	5.7080121247642e-06	7.79793184340857e-06	1.30240820946376e-05	9.05516945028171e-06	5.27128028164032e-06	7.45193142829317e-07	3.90395707491179e-06	1.91660435036542e-06	6.38466544868061e-06
pos_1008	0.000142653956932748	8.72088866303195e-06	6.12985367675102e-05	2.79843707502444e-05	4.37900442346611e-05	5.08121153938634e-05	2.23778429359536e-05	3.04005617349897e-05	9.10522179364048e-06	1.40803454408975e-05	1.04118572430884e-05	2.04188469745136e-05
pos_2590	6.71245569889964e-05	4.73590757380254e-06	2.77517643292907e-05	1.09086978465145e-05	1.82841007697627e-05	2.59987312998249e-05	1.19670665547861e-05	1.59059848290462e-05	4.34031542746719e-06	4.77981668719049e-06	6.94682829518072e-06	8.19107472622015e-06
pos_1791	0.000122434348692279	1.99928171829801e-06	5.27613460114432e-05	9.94522035992775e-06	2.75416216063363e-05	3.74033102108925e-05	2.16373586567615e-05	1.81971444047242e-05	4.70201675256348e-06	9.48272546839042e-06	1.01497427155545e-05	1.21799116608959e-05
pos_2562	3.01503526850557e-05	2.63019102952351e-06	1.1895460328623e-05	5.00528160083114e-06	8.01062375118181e-06	9.34344439074327e-06	5.29889041358385e-06	3.74368251008043e-06	1.73273849522917e-06	2.82509120993476e-06	4.50724971753832e-06	2.80739337989001e-06
pos_2803	0.000178227290256739	1.50347923830312e-05	6.63905853464947e-05	2.6716770188453e-05	4.50948316729543e-05	5.23395108215116e-05	3.22707872605439e-05	2.4688146267957e-05	5.79970047208917e-06	1.4403917642382e-05	1.88967589919483e-05	2.62927215279678e-05
pos_1522	1.77858626200862e-05	4.53097073081658e-07	8.06467078286858e-06	2.44601158664826e-06	3.48880159467498e-06	6.30287054124413e-06	2.26998001313084e-06	5.45788684047187e-06	1.23231484394912e-06	1.90586330109934e-06	1.40907827373731e-06	2.12460372611107e-06
pos_1742	1.86134104995092e-05	4.59083070021864e-07	7.77642650391878e-06	4.1305583828196e-06	3.17684267138322e-06	4.82202632601587e-06	3.1722653757021e-06	3.92362274270034e-06	2.58307188013838e-07	1.5235437927964e-06	1.12156859930729e-06	1.59580990581582e-06
pos_2478	2.51676539887598e-05	1.96134638245471e-06	1.4203199234513e-05	4.23815531604159e-06	1.11180609866394e-05	9.65907996878074e-06	4.81081573084345e-06	6.2730938274898e-06	1.95911026239566e-06	4.57636555733242e-06	4.14707769081668e-06	4.19533308044137e-06
pos_1884	0.000145339029515776	1.40209311263639e-05	7.91556201108646e-05	2.98100644303512e-05	5.60910655539934e-05	5.40564881099323e-05	3.97421439750373e-05	3.01666840903204e-05	1.1033769308921e-05	2.04563411825201e-05	1.58916567909615e-05	3.65177212592981e-05
pos_602	5.73959409973564e-06	2.15689206539173e-07	2.53589956682144e-06	1.18591209438977e-06	2.12755792364357e-06	1.93559658332083e-06	1.38284397494942e-06	9.84205825903132e-07	1.94157924792372e-07	5.2910955479304e-07	4.93752919821568e-07	8.0304548049179e-07
pos_1930	4.01633414125464e-05	3.12678243343938e-06	2.12428215620013e-05	6.36516774957489e-06	1.25956621556011e-05	1.78154063012919e-05	7.53640500279863e-06	6.49931458935444e-06	2.01525228250082e-06	4.83997474639403e-06	4.19974866261451e-06	2.67194512717079e-06
pos_1875	0.000321769494594104	4.55394591818622e-05	0.000153477667063586	7.23045491770086e-05	0.000114247278352166	0.000148276061902861	8.39405257136697e-05	8.04452018521303e-05	4.07728842991283e-05	4.41084486017371e-05	3.99310694778268e-05	6.88633088734392e-05
pos_2405	0.000311368122981849	1.44495754348593e-05	0.000146072445130955	5.11825126588183e-05	0.000107137757660796	0.000135340100935325	7.62504859118458e-05	4.91543764929227e-05	1.21977302468597e-05	2.68326812446694e-05	1.9796735172266e-05	4.43915737513203e-05
pos_1583	0.000110538770041842	3.70429024710394e-05	7.16706232597671e-05	4.89989394372847e-05	5.48430639860791e-05	6.11305609306422e-05	4.71001467406968e-05	4.46460300737138e-05	2.68874386852305e-05	3.36862494711639e-05	2.62784758635501e-05	3.97683634499194e-05
pos_2250	9.90485976966278e-06	1.98270390046423e-06	5.74801109961783e-06	2.92482283255742e-06	3.69656989183649e-06	4.50468530020132e-06	3.57462431844522e-06	3.64137505930035e-06	1.73736237314369e-06	2.50081639046681e-06	1.47505246651392e-06	2.66820682107507e-06
pos_2085	6.98442742439916e-05	0	1.32518776273092e-05	2.24436983338052e-06	2.423688099674e-05	2.31816019083387e-05	2.29050301059679e-05	1.24649582176416e-05	1.75335840562104e-05	1.41167656295678e-06	5.73522591753329e-06	2.18146552392484e-05
pos_800	0.000187431361258745	2.09890453403597e-05	3.57012089739008e-05	1.47975116155188e-05	5.77852265496502e-05	8.4101707846436e-05	6.35223886732849e-05	4.52500330932546e-05	8.60981255251959e-05	1.90962012111712e-06	1.9565414940183e-05	7.35907317951491e-05
pos_2429	0.000127384523885907	9.14786367910374e-05	8.573149633607e-05	9.28294856983599e-05	0.000115390414181589	0.000100156369176581	0.000110353808507772	0.000103361501684007	0.000108290187905119	9.68139760043642e-05	9.37807064434116e-05	9.79315751963975e-05
pos_2655	0.000209491240677212	0.000110744668565213	0.000116395055275201	0.000127306810673621	0.000176215303193778	0.000142980270854587	0.00015967574926165	0.000140589152615417	0.000162744898315917	0.000115921419163139	0.000115652762437556	0.000152750049774572
pos_792	3.70669771540861e-06	1.72100534195383e-07	1.37188185843633e-06	9.88268957669496e-09	1.67468118967039e-07	1.81354669110114e-06	2.48270594460581e-06	1.3202588400722e-07	3.03953218728413e-06	2.11297995001013e-06	5.42636394394296e-07	9.97810843637119e-07
pos_1277	0.00148649110231964	0.000586284274561943	0.000853367572472783	0.000813043866101831	0.00103441148188206	0.0010419288821342	0.000918768669407387	0.000950793483040174	0.00131050146581341	0.000869642041822622	0.000797197420942104	0.000943944218627365
pos_37	0.000278336563984244	0.000138350046963712	0.000170602639573322	0.000165375978829117	0.000174207106265528	0.000218015085399805	0.000193354596322249	0.000192282108393824	0.000264232368527589	0.000163046613290385	0.00019453140965213	0.000238498274239633
pos_2150	5.0151710655341e-06	1.71766524500923e-06	1.80509253646436e-06	0	2.30429562903013e-06	2.42582701659502e-06	0	1.92652259092727e-06	1.07809324268472e-06	3.05123107111885e-06	1.19744427758938e-06	3.27941948841288e-06
pos_1123	5.60765745920808e-06	2.12216575324237e-06	3.29609581388344e-06	1.47554508830827e-06	2.17214296713505e-06	2.04759010308574e-06	1.35629491896643e-06	1.92264647165297e-06	1.35005777165612e-06	2.50961986237688e-06	1.45832819164012e-06	5.22162436743991e-06
pos_1551	1.43222536176739e-05	9.9166692305305e-06	1.11747147044582e-05	8.4978345703292e-06	9.96073331806735e-06	1.1674018197449e-05	1.13530521154881e-05	9.52819090663082e-06	1.0711699056726e-05	1.19255985736145e-05	9.80907695063077e-06	1.40705334444275e-05
pos_2717	8.79535231667916e-06	1.75435138571152e-06	2.62715864446118e-06	3.23262768068682e-06	3.92341355289929e-06	1.92014291317243e-06	2.62790474218414e-06	4.26480650072228e-06	1.53914112810364e-06	2.4163979808042e-06	1.24789097791254e-06	6.29884169790701e-06
pos_626	4.42655584999599e-05	4.51617106145944e-06	2.17067595902027e-05	1.74974873838562e-05	2.47939879424849e-05	1.80460103400061e-05	2.10256673769707e-05	2.34667088956901e-05	1.06379917732939e-05	1.51272403590329e-05	1.20974497987662e-05	3.6353875735311e-05
pos_1035	3.29815537642633e-05	1.42698449329147e-05	1.94747890727391e-05	2.01661658879195e-05	1.93886947255518e-05	2.05420892883088e-05	1.88863075543529e-05	2.04420209543451e-05	2.00484653632003e-05	2.33390471447748e-05	1.58153663943261e-05	2.05203808470549e-05
pos_1051	7.235472780647e-06	1.77661218021961e-06	2.82432922456346e-06	2.71007949489542e-06	2.73199173761384e-06	3.92245308759846e-06	1.89644771330146e-06	3.99634273557305e-06	3.82347619266298e-06	3.61854362311447e-06	8.51425814103647e-07	4.00040334133602e-06
pos_2264	8.73539939910868e-06	4.02823325272518e-06	8.2184372541476e-07	0	1.7958549539772e-06	2.70558094407792e-06	1.91792813628293e-06	4.62252054631674e-06	3.40111543795635e-06	4.97030056049441e-06	3.55962642010008e-06	5.1526033504334e-06
pos_74	0.000111818547926929	1.85483064695404e-05	1.446865107199e-05	1.61949067315788e-05	1.34287365931353e-05	4.24463848384043e-05	3.13657847680492e-05	3.68873403229546e-05	6.13742775210385e-05	4.46271722809034e-05	2.53886602331968e-05	7.49684994970206e-05
pos_2597	4.8897555979896e-05	2.44615884788046e-05	2.62102923233104e-05	1.90069841155258e-05	2.39357535859048e-05	2.68693904644206e-05	2.79243763105828e-05	2.41281564093107e-05	2.34414743308556e-05	2.43715309791098e-05	2.34487850949537e-05	3.42452555314782e-05
pos_309	0.000832866591521636	0.000449461224213505	0.000432566005685397	0.000412212589972818	0.000497514011727567	0.000487339506900576	0.000512705692719816	0.00048689950568383	0.00038299946066305	0.000478088443164759	0.000405130701965137	0.000591407276386653
pos_822	5.61053192709378e-06	1.44662088616248e-06	0	0	0	0	9.51402138343371e-07	0	0	0	0	1.46020547612873e-06
pos_994	0.00014558870830708	9.5432777862458e-05	9.52810843247133e-05	9.34854464435467e-05	9.98231726787498e-05	9.62811618181878e-05	0.000104637770835296	9.18014148994608e-05	8.61379980876646e-05	8.43624285608598e-05	8.27211488776346e-05	0.000107551182031307
pos_1082	7.72436681914082e-06	5.77212411042449e-06	4.79907987979426e-06	5.35646762911605e-06	5.61928116122186e-06	6.06185117303307e-06	5.80946092072386e-06	4.77932757289988e-06	4.68771791326203e-06	5.02492358592258e-06	5.1208646200273e-06	6.16523289543051e-06
pos_1293	5.70622305543822e-06	4.89903656397404e-06	4.20873790839255e-06	4.45716187300884e-06	4.70863533849879e-06	4.98978654556474e-06	4.91452501111544e-06	4.34316440855743e-06	4.25501685587033e-06	4.88594529045165e-06	4.6908256243583e-06	4.83573424096396e-06
pos_2247	8.90062026840467e-05	6.43044795767284e-05	4.61975957032653e-05	5.16513626228695e-05	5.16671470395488e-05	6.44929741106626e-05	5.52362409900828e-05	4.52533033107515e-05	4.57699515318615e-05	5.47580663124932e-05	5.34521739219127e-05	5.28203010986125e-05
pos_1417	0.00372727035375964	0.00208588783256993	0.00111634189418271	0.00152948243871405	0.00178833742837957	0.00153883988076728	0.0016410687015265	0.00153920222350909	0.00142193192308578	0.0019664402654644	0.00229606312251254	0.00218104526261526
pos_53	1.74178471054485e-05	1.41866580604275e-05	1.24097340098221e-05	1.28973851490553e-05	1.35653169026241e-05	1.30722922363684e-05	1.33581512597534e-05	1.31408007083858e-05	1.15332593558026e-05	1.42824551966588e-05	1.3621529975826e-05	1.39555520005323e-05
pos_729	0.00230691054739661	0.00187797878296073	0.00168123707592745	0.00177031579195731	0.00177533408994877	0.00184472358209912	0.0018301884707914	0.00181488238994744	0.00153558288627434	0.00183545415944052	0.00184134995043469	0.00193827145503154
pos_863	2.69938244051565e-05	2.09374064934565e-05	1.92062212979638e-05	1.94325601625973e-05	1.98957830213721e-05	1.98199353288902e-05	1.94451948480445e-05	1.97562348746551e-05	1.64064452286766e-05	2.00310074076795e-05	1.97884188544345e-05	2.07156313784031e-05
pos_2339	3.36663435082313e-06	1.1101901745821e-05	4.50392061465578e-06	9.09706219838129e-06	2.19901734759324e-05	8.87924902355009e-06	6.98394512962993e-06	1.75038428368262e-05	1.1675506468171e-05	2.22236098715327e-05	1.02972308996771e-05	1.85099037683498e-05
pos_2832	1.72342842147331e-05	1.83028072756596e-05	1.54543645074989e-05	1.72503121631803e-05	2.03332066637816e-05	1.98861565093231e-05	1.57428275136947e-05	1.8996268587714e-05	1.7449753386355e-05	2.05009405939227e-05	1.72587084539204e-05	2.07919761838658e-05
pos_2785	1.01476222583948e-05	6.81247857027674e-06	3.6759223272093e-06	7.12634179653923e-06	2.24567698361869e-05	4.97996798310628e-06	5.18637288967372e-06	5.2199454294574e-06	1.30859352231756e-05	7.02491342258529e-06	1.33926287613256e-05	1.5110485890227e-05
pos_1139	4.91549039822314e-05	7.78231001790698e-05	4.70654619208365e-05	6.60173186837613e-05	0.000179488170271839	6.02093298775753e-05	4.16674624583095e-05	6.75615977205772e-05	7.87428874656303e-05	7.61516256586816e-05	5.04066395086156e-05	7.53934047928043e-05
pos_710	4.36195328154247e-07	6.75066842927753e-07	2.12352260730988e-09	8.49458117819248e-07	1.37014083292618e-05	0	4.6712805449675e-07	3.52636148155893e-07	2.52208468881545e-06	7.05575840897554e-06	3.75439583286656e-07	4.35741471873491e-06
pos_2227	5.62772064224383e-05	6.21325198477085e-05	4.12690447285176e-05	3.63561430612322e-05	5.54033243294361e-05	5.13636797932879e-05	5.15691715151627e-05	5.02553865009697e-05	5.83376093356597e-05	6.72754783870188e-05	4.67564062850082e-05	4.07820813633648e-05
pos_524	2.71325003401138e-05	2.88411965389025e-05	2.20507822762732e-05	1.92714803834065e-05	3.18661112165202e-05	2.93284605243176e-05	2.70031340423313e-05	2.98951703549525e-05	3.26308843573943e-05	3.35496726786402e-05	2.06067784424539e-05	1.83529539143786e-05
pos_1162	0.00016022154882097	0.000197319688761785	0.000177772311582501	0.000143066796086331	0.000211251558892516	0.000166845769563076	0.000184778116373585	0.000188658447466419	0.000166298727663172	0.000240291484580454	0.000156249457871854	0.00012449608555896
pos_974	3.35338705041458e-05	5.56781400207411e-05	4.01677293037858e-05	4.42442247412391e-05	5.70736813362866e-05	3.99014438631595e-05	3.64236253806632e-05	4.97856118434298e-05	4.57001712259488e-05	7.17903075023123e-05	4.05796151964594e-05	2.99738548510118e-05
pos_2423	0.000292200051505082	0.000412994932838689	0.000236960737922245	0.000325550093266297	0.000422552351438772	0.000338319660803282	0.000379978645912324	0.00035628388496056	0.000326861564277756	0.000517574250566844	0.00034750460415048	0.000322614898165514
pos_2483	0.000186181270303378	0.000236054602394262	0.000165855656377426	0.000197364639914754	0.000215607603250618	0.000201753373444296	0.000204281756533901	0.000211501981467008	0.0002067005552441	0.000252231806811226	0.000208922960767784	0.000191931058058424
pos_1402	0.000151585544599397	0.000195955818073042	0.00015063652819877	0.000170442908957652	0.000201969805855275	0.000177616104988897	0.000189037083223811	0.000185319707241882	0.000176196950167957	0.000197962916260091	0.000181503600402172	0.000164265782977297
pos_1829	5.29996927882098e-05	6.19213453831317e-05	5.40245833311757e-05	5.73661574059156e-05	6.61816488802401e-05	5.58579442010288e-05	6.12967800149565e-05	6.18162964604773e-05	5.75165517189185e-05	6.63289120257442e-05	5.96877064709682e-05	5.24794233737961e-05
pos_1676	0.00455336917297641	0.00423234147582069	0.003703951013433	0.00484703067662243	0.00484202130750251	0.00403273216633599	0.00439865903996059	0.00485232555865995	0.0043546032465507	0.00540457427028605	0.00378564900452259	0.00442753570163052
pos_2221	0.000242659901320921	0.000233134208608594	0.000201940087940583	0.000272070812398608	0.000285105912362693	0.000216823628662381	0.000245726830162415	0.000265439672753517	0.000235405101099329	0.00027238371885424	0.000206720193916594	0.000231674805601176
pos_1141	1.72535810088484e-05	2.5607171467383e-05	2.03288102216096e-05	2.53988822599635e-05	4.73858259215339e-05	1.50831721446601e-05	3.1145888413144e-05	3.35311177847392e-05	1.77626953626292e-05	3.6666681758369e-05	8.31919499750707e-06	1.32588457165065e-05
pos_133	0.000103118850128283	0.000109063317709569	0.000109880167922847	0.000113844242670593	0.000160481239787251	9.58178089315817e-05	0.000123965532079287	0.000131320970480963	8.9872428638604e-05	0.000161581551878289	9.64100774997213e-05	8.03247388867606e-05
pos_1999	1.13302883446215e-06	9.72647091982189e-07	1.01179920859605e-06	7.48235544717182e-06	1.16409051919916e-05	1.19858386841974e-06	6.1038881716978e-06	1.13950472584905e-05	1.07369833522837e-06	1.83344726643403e-05	1.52436126276636e-06	1.48854435387125e-06
pos_2837	3.31182879090538e-05	4.37010028570084e-05	3.68873665362316e-05	4.9877517998968e-05	4.93272229771575e-05	3.99865992109383e-05	3.69811053540263e-05	5.14052482249149e-05	3.4676798625109e-05	5.44288110788318e-05	3.4264929961903e-05	3.27162991793496e-05
pos_1092	7.14977686995547e-06	9.30338242779698e-06	5.61791181903807e-06	1.42980946645792e-07	1.69221391984726e-05	5.3263695338409e-06	4.3660220099043e-06	9.73857669869703e-06	3.14979490949438e-07	1.1421920744868e-05	1.62827032372552e-07	1.14818203561305e-06
pos_2720	0.000153667714809123	0.000155399863051336	0.000121434733008807	6.56242384712145e-05	0.000196730399809622	0.000126149448110565	0.000153897385167027	0.000220864216104876	8.41087767271159e-05	0.000275889604839376	5.23277734750838e-05	9.49008132162378e-05
pos_1955	2.4966517693735e-05	2.68406521361577e-05	3.50483841346585e-05	2.65497178214066e-05	3.93610556582615e-05	2.37565008721312e-05	2.79297418875909e-05	3.12066565417249e-05	2.67973110607934e-05	4.00034411734337e-05	1.90285232426181e-05	3.07082338711168e-05
pos_293	5.0269455999357e-06	4.08872868501637e-06	5.63199608526506e-06	5.77591076000133e-06	6.1019066942461e-06	4.41659650822312e-06	5.2474771573769e-06	5.12673728516006e-06	4.31750253417011e-06	6.69428246217586e-06	3.5651957286917e-06	3.84633209519107e-06
pos_635	0.000359222248346786	0.00017188701863773	0.000302991109659571	0.000290177745956644	0.0005943765158742	0.000178970464721177	0.00030932976547552	0.000380095311104121	7.46544312062184e-05	0.00053644734789251	3.24825179574629e-05	7.28692677487495e-05
pos_2068	0.000570297122305866	0.000661662291972231	0.000503641109316395	0.000611786087812385	0.000623443684981751	0.000599192586625934	0.00058921710024394	0.000574216412993489	0.00065023434113348	0.000686030739827609	0.000481249261239871	0.000553065760994178
pos_502	1.02415741967494e-05	9.9904659729542e-06	6.36571863656091e-06	1.19387222447328e-05	1.01602205819667e-05	9.09533579335524e-06	9.58388422190119e-06	1.03652206927167e-05	1.09760236450611e-05	1.39491177705114e-05	5.70195284908242e-06	9.65719499063558e-06
pos_301	0.000369050316969034	0.000399437152898816	0.000339673917036701	0.00041750606732212	0.000373499708850124	0.000436228213177677	0.000413519119022351	0.000439798345661491	0.000431463555666562	0.000427935820056485	0.000336385075852386	0.000376042455784294
pos_967	7.63851967310908e-05	8.03511171568225e-05	7.77870018525161e-05	7.96050858106168e-05	7.23337891004689e-05	8.06092140466352e-05	7.98931638653943e-05	8.37330366415676e-05	8.63253969924198e-05	8.52243688101911e-05	6.24619485140068e-05	7.45231604112728e-05
pos_2419	0.00158734542015543	0.00193753642792667	0.00138197526511277	0.001730480901923	0.00176778067393635	0.00173111324402182	0.00172059398214526	0.00185052111208561	0.00164832633525209	0.00182698053030561	0.00160041954786175	0.00152945823461664
pos_70	4.00124925046065e-05	4.2839432740253e-05	3.72950776123889e-05	4.21423448787292e-05	4.08144447912837e-05	4.0607350890926e-05	4.18205425528022e-05	4.29566819888549e-05	4.10863420515135e-05	4.15365062598204e-05	3.85023872851492e-05	4.02228935868626e-05
pos_1332	0.000500449163567048	0.000540766376498502	0.00048103096352461	0.000567466841334785	0.000567130944758369	0.00056390862885142	0.000574502764623688	0.000587790723345189	0.000613444286314808	0.000558364927434623	0.000519434745797191	0.000547181324354769
pos_2026	9.89998908517696e-05	0.00011016438619717	9.05129315340311e-05	0.000114818638980737	0.000103437939326113	0.000104730769771689	0.000110064472427242	0.00011450129384121	0.000123421048849353	0.000115205408501083	0.000105588484289235	0.000100771868256316
pos_465	7.65943916185264e-05	8.9951508972092e-05	7.26191928980829e-05	8.82148526479326e-05	8.77724645495951e-05	8.52475894298813e-05	8.8343092451186e-05	8.91124599652608e-05	9.5660631658088e-05	8.77101607842317e-05	8.53893026914888e-05	7.74012946717905e-05
pos_825	7.73077863576895e-05	9.6007879325217e-05	7.4332703514344e-05	7.70046124310854e-05	9.17854188407516e-05	0.000102209712769746	7.07133253591981e-05	8.06406053141084e-05	9.47196954435109e-05	7.36219833924926e-05	4.30351681036817e-05	7.61544015540135e-05
pos_1040	7.83874230516209e-06	1.32057949160496e-05	1.08304882609944e-05	1.25904643474031e-05	1.09252006312268e-05	1.40586535633724e-05	1.09920550458089e-05	1.49470807513284e-05	1.27859033210459e-05	9.93422330866367e-06	6.49935365262856e-06	9.4973341927714e-06
pos_1042	2.38073706366802e-05	3.15346324626208e-05	2.87970028442047e-05	2.6364737581942e-05	3.48927632532693e-05	3.53810185779563e-05	3.19153538720688e-05	3.51468647677599e-05	3.51624289122003e-05	3.1830993998298e-05	1.90178501652335e-05	2.47076748620908e-05
pos_1654	9.06541925384348e-06	1.36964598706159e-05	1.12247242211114e-05	1.1652984602397e-05	9.3593937336065e-06	1.15113795518312e-05	9.01917779240651e-06	9.48864788831384e-06	1.27691508060175e-05	1.17808246486053e-05	8.06091432434758e-06	8.62406407764855e-06
pos_1440	9.92559823142782e-06	1.50063257821066e-05	1.13281987567802e-05	1.17552234771556e-05	1.1412070638197e-05	1.05794357146965e-05	1.04157601938623e-05	1.14817231237669e-05	1.26223372240964e-05	1.29342809857649e-05	8.17576384341854e-06	7.96964130449787e-06
pos_248	0.0105177725409358	0.016733406022194	0.013387423544099	0.0125244362121346	0.012745271654071	0.0121915274879058	0.0108057441430979	0.0122617980920402	0.0143663863773992	0.0151789518122954	0.00854221066703499	0.00820294709589478
pos_117	0.000319224355702004	0.000500199869520371	0.000396359370701674	0.000376745691050184	0.000375843887734663	0.000352159472519696	0.000332756342991808	0.000359538603605168	0.000411703784645202	0.000438827696772404	0.000250335235302967	0.000251030498066759
pos_73	0.00136947574564972	0.00214854826514763	0.00166630440437014	0.00161307192975695	0.00160505564890005	0.00152222246409442	0.00135103676540319	0.0015350339083709	0.0017536738310701	0.00184803787486713	0.00103825458749034	0.00102780662119778
pos_1315	1.7344746416432e-05	2.48742239286796e-05	2.00022846694726e-05	2.10441658315305e-05	1.94735988577458e-05	1.75999854662526e-05	1.68070395227514e-05	1.80701641688068e-05	2.11276772671357e-05	2.08822698184919e-05	1.25964797854797e-05	1.32266832218429e-05
pos_2203	6.86344148122482e-05	0.000105401152941636	8.15515336687234e-05	8.4422797770751e-05	7.73954700288465e-05	7.33739369095413e-05	6.95631046591944e-05	7.14082558548101e-05	8.3060997052997e-05	9.02342394164169e-05	5.84323844963681e-05	5.63423322446967e-05
pos_2270	0.000230356624575012	0.000366458523292283	0.000274401403179552	0.000266164451146599	0.00028258137630601	0.000265057787993706	0.000240681980797369	0.000264241523930719	0.000344055167820525	0.000320353275109393	0.000191724185089291	0.000217041074729733
pos_2545	7.0901747245348e-05	0.000113988381340402	8.49918568684619e-05	8.20416545504879e-05	8.47123938047862e-05	8.33179292980038e-05	6.38980873857014e-05	8.13422567362128e-05	0.000102914954388013	9.83515233422554e-05	5.8274003546733e-05	5.59043564759193e-05
pos_2656	2.73517560429772e-05	3.9879321323178e-05	3.23764675650897e-05	3.16096835518497e-05	2.99666405194484e-05	3.0216337107654e-05	2.91575346765997e-05	3.00438743836575e-05	3.58879505493609e-05	3.40391347484604e-05	2.66682373107605e-05	2.37633344554476e-05
pos_1444	5.57019587481693e-05	8.43034361349733e-05	6.17190958427398e-05	6.80045064987503e-05	6.14017246035174e-05	6.18919721666037e-05	6.20536332653763e-05	6.44656616997701e-05	7.70092838835187e-05	7.3051967367023e-05	5.26199981646856e-05	4.69605016144348e-05
pos_2666	2.25816179426485e-05	3.69086356479264e-05	2.66322379984898e-05	2.84048094738919e-05	2.86027858278049e-05	2.70066225245455e-05	2.56255202259439e-05	2.69756412159349e-05	3.46721718318787e-05	3.26263274464427e-05	2.14079008022221e-05	1.6517448615957e-05
pos_508	9.25891193637466e-06	1.26706973484119e-05	7.278301852016e-06	9.69129122067269e-06	9.65457873164495e-06	7.63867521376203e-06	9.97869032994471e-06	8.85265657369809e-06	1.18906648100523e-05	1.12035898309051e-05	5.95192616630801e-06	7.4187574934448e-06
pos_959	0.000137896768884628	0.000187505719695172	0.000138907204152237	0.000166643292017073	0.000159787371597859	0.000142988256540613	0.00014394246767713	0.000142282198245626	0.000186947625093077	0.000161344386199542	0.000108457184707475	0.000135002393201733
pos_1254	1.27308079629967e-05	1.75937475465662e-05	8.13701466674423e-06	1.47544616130387e-05	1.19090704087284e-05	1.17484386679186e-05	9.86866181457923e-06	1.32764459191864e-05	1.57463879694438e-05	1.34922485078557e-05	7.77088248667844e-06	1.05227069330702e-05
pos_258	3.40895282706212e-05	4.77869516941917e-05	2.97654837260369e-05	4.89761823384719e-05	3.38766085549492e-05	3.30612540144046e-05	2.86220597296157e-05	3.43797914858613e-05	4.22501338758585e-05	4.23561411428939e-05	1.96730377013266e-05	2.26532765230405e-05
pos_2628	0.000990578007489836	0.00153512158798474	0.00160619741823269	0.0011898064156875	0.00161145334779814	0.00134394834851859	0.00105287611824723	0.00118900454026606	0.00156725515392047	0.00169062274177355	0.00111227557314106	0.000710389882104339
pos_381	1.02980626001664e-05	1.62320696314108e-05	1.65915022204371e-05	1.41658473785501e-05	1.53915860075655e-05	1.28263400281745e-05	1.12864893105821e-05	1.2364319625784e-05	1.34048096463067e-05	1.4066242196961e-05	1.15607508069727e-05	9.39895457194839e-06
pos_534	0.000197209063517988	0.000224736921593063	0.000191588333824087	0.000230707081947581	0.00021332081532901	0.000197127074347727	0.000159035924232289	0.000203593213920081	0.000215989460466603	0.000186506943234674	0.000126545809595387	0.000136051960374461
pos_973	1.06652071254627e-05	1.35186307135579e-05	1.13011518710414e-05	1.13585458971561e-05	1.38210478304703e-05	1.30231434645198e-05	8.07829066283023e-06	1.16747366824701e-05	9.89058117937375e-06	1.0364371652273e-05	5.71386924104013e-06	7.52408666716328e-06
pos_191	0.00554351973029737	0.00571596478492247	0.00695663621137438	0.00559686117797696	0.00492967113784619	0.00655274581861659	0.00535610215235919	0.00636412168836654	0.00777895726917029	0.00684328706256829	0.00368682698774621	0.0049261333355405
pos_2615	0.000786058950734136	0.000879474229693813	0.0009322604545892	0.000897234618469162	0.000770041063789157	0.00086146303212008	0.000787751771134466	0.000854538228908768	0.000986111154525099	0.00090279930826381	0.000748932358603571	0.000742903590827136
pos_1846	8.65292108336615e-06	9.39914737414905e-06	8.88633069375188e-06	9.36457591678983e-06	9.17940182173547e-06	9.93853587531579e-06	9.88094851798314e-06	1.07421114692693e-05	9.46095229737463e-06	1.08884927133192e-05	8.03196264611969e-06	6.6423905843958e-06
pos_115	0.00506188740020014	0.00536967912439326	0.00493869805917119	0.00517424344022865	0.00550036010334791	0.00497134095145947	0.00483675853494804	0.00524502520519983	0.00530592904020369	0.00569455205229251	0.00406019796121629	0.00414121041665525
pos_1075	3.42658009668608e-05	3.61829149192699e-05	3.31849553628311e-05	3.90011510949411e-05	3.73073499524725e-05	3.73866626978872e-05	3.36160818731272e-05	3.74717070930615e-05	3.76211291157617e-05	4.0337761902668e-05	2.93476991371288e-05	3.22958507905294e-05
pos_1367	3.25581024774294e-06	4.80509939227293e-06	2.74374877358906e-06	5.3378833228614e-06	4.79785954308387e-06	4.26802516362791e-06	3.36548561054646e-06	5.28641887875219e-06	4.52601929323536e-06	4.74112351231887e-06	1.39054168676293e-06	1.82694800437445e-06
pos_2019	8.76744024115203e-06	5.36741983093276e-06	1.05179977265898e-05	9.75873066673732e-06	1.00342081385612e-05	9.11435368314526e-06	9.55907762750476e-06	7.90186982379496e-06	9.0493885152399e-06	1.2820533706625e-05	7.25769745671347e-06	9.50705849626112e-06
pos_2059	2.57731068987857e-06	2.78524265284487e-06	1.184641902091e-05	1.05626765291654e-05	1.08334980446796e-05	6.57417410211257e-06	8.21332425476394e-06	8.18403126048027e-06	7.40160479470214e-06	1.21545553951168e-05	5.57386351726445e-06	7.70166333558292e-06
pos_2579	5.74641050700464e-06	8.46916905963131e-06	1.36484107841492e-05	1.38755247028298e-05	1.61551539593263e-05	1.4277946283185e-05	1.12408932008659e-05	1.44146797825502e-05	1.20484369379059e-05	1.8873088992216e-05	1.08337701199529e-05	9.95623623692577e-06
pos_1727	9.04821679503414e-05	0.000142778121411443	0.000190946471749622	0.000142739631677436	0.000152345388507972	0.000146829402707336	0.000140437655710937	0.00012862741897866	0.000127622106124926	0.000196360366588521	0.000112798729084826	0.000109139972527181
pos_257	4.2395225904706e-06	1.58282101127207e-05	3.19795775706057e-05	1.43070155606541e-05	2.13382183355026e-05	1.06560919918051e-05	1.79828786464474e-05	2.35569148285465e-05	2.05090651927647e-05	5.51637964125135e-05	1.06017582581873e-05	1.8185514065257e-05
pos_338	0.00127646598224361	0.00145218059259737	0.00156136705024009	0.00152097502615265	0.00150882346993902	0.00136280111746217	0.00137154355696821	0.00148939537552653	0.00151285475161768	0.00176139958060797	0.00142399856485821	0.00141517391183258
pos_2382	0.000345417891112186	0.000319048204693631	0.00036301841437384	0.000319065527099413	0.000318351450198052	0.000324183769933264	0.00028842465949542	0.000320872390910453	0.000305746442932563	0.000350585119221804	0.000259158519364071	0.000271272094493671
pos_2466	0.000212310508826832	0.000210718920362896	0.000242740191313674	0.000223959235262587	0.000229641841845906	0.000205848890864187	0.000196708029231623	0.00021593824573392	0.000215680487667553	0.000239049303999205	0.000168489045334057	0.000159656504026834
pos_1069	0.00019012631339607	0.000189073327747081	0.000249811358353206	0.000188691673855588	0.000215401552400508	0.000187231039857354	0.000199900093824618	0.000185905942233582	0.000181194660253643	0.000199708711226894	0.000152261376143215	0.000152314984363187
pos_552	4.18587726901725e-05	4.1101077672708e-05	5.30108401617105e-05	3.79749632175892e-05	4.31313880061729e-05	4.24173519880864e-05	4.23889643239894e-05	4.0681909042336e-05	4.49670305154574e-05	4.68383690003549e-05	3.67557573829384e-05	3.46903092706545e-05
pos_576	1.98363965719766e-05	1.70262099925586e-05	2.21013989726016e-05	1.72485914966042e-05	1.71542779908511e-05	1.86777748400444e-05	1.58407328191757e-05	1.82433377633013e-05	1.92347472818681e-05	2.27876160971963e-05	1.6563135368695e-05	1.49823026624159e-05
pos_1273	9.57424638271329e-06	1.06413847412881e-05	2.4779527873667e-05	1.60948925241109e-05	1.79375259340876e-05	1.22797762987137e-05	1.12307510319837e-05	1.66148210454949e-05	1.71896257814561e-05	2.3117934120808e-05	1.27695428063535e-05	8.12460209772071e-06
pos_539	0.000266137127546409	0.000246942095053851	0.000469746944350199	0.000359239876995837	0.000314281900331671	0.000331487891420327	0.00024920345333834	0.000316246732611672	0.000336534589880867	0.000420950856961348	0.00036229345687369	0.000204821880475533
pos_324	1.58717285920674e-05	2.03398968198083e-05	2.49540735043603e-05	1.77672043857763e-05	2.36085999536146e-05	2.71797417933747e-05	1.8151476562531e-05	2.09461435010491e-05	3.36679395320108e-05	1.46302152567096e-05	1.64318212012648e-05	1.50846115552385e-05
pos_2853	0.0024280790023019	0.00203482501379061	0.0134590389663741	0.00324345824851021	0.00960513081089198	0.00925622689891784	0.00643636972065964	0.00527761139273764	0.0197232520685724	0.00240452073646798	0.00369900275489402	0.00169014949901359
pos_327	2.0161709735204e-05	2.84286827836909e-05	6.42896060951603e-05	1.30003838148115e-05	5.26867355483134e-05	4.17036822382774e-05	3.20898405449011e-05	2.71520481862076e-05	0.000102340134245985	1.05685361481896e-05	7.17031135174287e-06	1.13875474158367e-05
pos_577	3.89068437579715e-05	4.7009071832981e-05	6.74666959768868e-05	3.93958180516179e-05	5.60962033630596e-05	5.41252701355745e-05	5.19822909366583e-05	4.88319156822079e-05	9.26893710261284e-05	2.91598763847597e-05	3.52116041540282e-05	4.37299227022814e-05
pos_1430	3.04019721285508e-05	1.13200268662948e-05	6.0165930369644e-05	1.38327138714235e-05	5.34315531671597e-05	2.21702668495888e-05	2.23622650244671e-05	2.21562653149535e-05	5.51533224624606e-05	8.1694445830069e-06	1.27021904646864e-05	6.44357210471336e-06
pos_473	0	6.18143512068655e-10	7.9331476722926e-06	1.24760461746662e-08	8.92265499082164e-06	1.66725850231714e-06	3.55715667755019e-06	1.92603243691255e-06	8.6439455871609e-06	3.49844116850397e-08	0	0
pos_1740	0	0	0.000110208977249046	1.40695424420054e-07	9.76445807497481e-05	4.76574571455428e-05	4.74597848214134e-05	2.78540437800712e-05	0.000136038485298921	0	3.10516390444384e-06	1.30679056632118e-06
pos_2373	1.47394318304597e-06	2.72473657777219e-06	0.000108193619217767	6.63566807728104e-06	0.000123171613807175	4.81499632991071e-05	6.1408485751463e-05	4.02251864718044e-05	0.000134523997638246	0	6.32208103774947e-06	5.08187192953212e-06
pos_2689	6.87255332169672e-06	4.3805407601974e-06	0.00013601448831174	1.8011140064112e-05	0.000147011533202541	5.8280356253001e-05	8.04085788859977e-05	5.22663357939627e-05	0.000165476683121405	0	9.53287628307005e-06	5.43667501441183e-06
pos_1830	0.000880769040229019	0.00106462527190413	0.00162243467843926	0.000968553005545629	0.00159236038565578	0.00136526858066136	0.00145565643752487	0.00122780988914734	0.00187446539094871	0.000885659808400376	0.00104216894900294	0.000894931948343417
pos_2365	0.000825387718324878	0.000548183162712368	0.00234711526184988	0.000537875871985338	0.00281559653719966	0.00164097386649371	0.00174752122358735	0.00133603358940991	0.00323430767560947	0.000534583554775372	0.00110115336295095	0.000521985443322247
pos_1518	1.79545154711262e-05	2.05983539136477e-05	2.02694449756663e-05	1.92052523023621e-05	2.23557233997376e-05	2.02506065358722e-05	2.10440514564414e-05	1.87473572378072e-05	2.32530515150676e-05	2.06442634975489e-05	2.11712509555619e-05	1.79084418817951e-05
pos_558	0.000989022094696876	0.00122600399578699	0.00136997465201588	0.0012067495662454	0.00136814824327124	0.00126074419566659	0.00114574451254622	0.00117206072146509	0.00144888277004211	0.001169875974523	0.0012694288772375	0.000949336065942851
pos_1576	3.32769288423287e-06	1.95997406956248e-05	8.25963900193273e-06	1.11323847032808e-05	2.12437561577371e-05	1.49599258827055e-05	1.43893468558585e-05	1.41438878615305e-05	2.33707958397171e-05	1.60306318505991e-05	7.68887407320849e-06	1.31674943857454e-06
pos_2305	0.000210189976393718	0.000238134079526735	0.000214217068604259	0.000236700917334726	0.000243620857548302	0.000228723959777915	0.000227821089897334	0.000234197153823495	0.000262032704080135	0.000241478577416682	0.000237092935427665	0.000199786276370488
pos_1880	0.000300382686781557	0.000351333638397156	0.000356708664632436	0.000331866015108443	0.000351550840764704	0.000354916456006169	0.000330765053852649	0.000315657609215568	0.000424817173192034	0.000382194403070598	0.000335808214146301	0.000234473050345133
pos_392	0.00798175534592316	0.0120702659852653	0.0114299699411069	0.0104256835812672	0.0111598797173231	0.0112379213717448	0.010370395663137	0.0109486780526892	0.0130777971912258	0.0126496071907665	0.0109656458607829	0.00901329887250157
pos_397	0.00548364610891642	0.0102643225778177	0.00885510562814571	0.00772121100872575	0.00838153076105747	0.00846297019797387	0.00719111773076182	0.00819103804336123	0.0101472213982848	0.0108333782966999	0.00743345887303006	0.00487497469850253
pos_1291	0.000178914152131474	0.000142082766026002	0.000122856549454064	0.000153420026786609	0.000145432615028673	0.000134162919588135	0.00016583056884375	0.000158066007904133	0.000149846492850154	0.000183687088843243	0.000115348449439559	0.000191745113113411
pos_1320	0.00202323143465156	0.00180201663882979	0.00170551126233748	0.00188976725775007	0.00199173198764084	0.00172142235207509	0.00190849374685039	0.00183996293703257	0.00181835338793389	0.00196406490718556	0.00160180934016776	0.00189404331041662
pos_201	5.55786135383457e-06	5.56498550382963e-06	4.21040617404656e-06	5.57901801329865e-06	5.5515098029004e-06	4.60606343365737e-06	4.76642881527884e-06	5.31019160285895e-06	5.60749175685157e-06	5.96854999336179e-06	4.73890504647133e-06	5.26758654784921e-06
pos_288	6.87438078150281e-05	6.60099505487511e-05	5.58933125441224e-05	6.54337008541722e-05	6.09053037687913e-05	5.62221583018675e-05	5.77213120330672e-05	6.06271038550592e-05	6.93217300303439e-05	6.39502347061845e-05	5.64668635721933e-05	6.75626060412414e-05
pos_318	5.84471212392977e-05	5.2527217109423e-05	5.58964120848986e-05	5.25612690047369e-05	5.85343729178849e-05	4.97953505966624e-05	5.65892310183433e-05	5.2664446353247e-05	5.52377955447115e-05	5.34469776293902e-05	5.12361664600679e-05	5.58819785468395e-05
pos_1345	4.49652912993909e-05	2.19621806563784e-05	2.4922907857798e-05	1.9268488434717e-05	4.74933058891599e-05	2.24476041671605e-05	3.56479349312388e-05	2.64519816698155e-05	2.10549758138459e-05	4.77356813389328e-05	2.42535871999318e-05	4.77973745079864e-05
pos_604	3.73612810041708e-05	1.94238819401464e-05	2.31021724247194e-05	1.30977517702863e-05	7.11768841617866e-05	2.87628348887176e-05	3.04942704035266e-05	4.65785504480392e-05	1.90581070574452e-05	3.86119400760111e-05	1.69079039270105e-05	6.58776074758063e-05
pos_2129	8.39801147997591e-05	6.39561287210397e-05	4.49213734426448e-05	6.75166536243983e-05	6.80011703451874e-05	6.00898352857905e-05	6.76521821252175e-05	6.33737208782077e-05	8.21109589629087e-05	4.21473145807367e-05	3.34394652334176e-05	3.87940652852906e-05
pos_637	0.000183467945718383	0.000130069629674545	0.000103470769328334	0.000201687262931817	0.000194879787501632	0.000135516382246957	0.00014672047647273	0.000158850779491102	0.000181926112718783	9.93385926183494e-05	6.522208052539e-05	0.000103452516015841
pos_153	0.00577117801889694	0.00552012078055313	0.00403743807541336	0.00606020759701801	0.00594726241609609	0.00494695449536953	0.00515955368850496	0.00508354603304198	0.00523332699076843	0.0047016175546309	0.00496568403988439	0.00460152689799435
pos_2810	1.221667425742e-05	7.51736715985374e-06	5.31502017102976e-06	1.26381776691806e-05	9.057059770196e-06	8.51625736143115e-06	9.15004083617937e-06	8.40947204283678e-06	7.1338277222366e-06	6.06899194474677e-06	4.93175128352405e-06	6.27921578889556e-06
pos_769	0.000175473282272463	0.000157050365708167	0.000109886080217008	0.000140848712658297	0.00018367115687446	0.00013370098499313	0.00012952231571036	0.000140466994088945	0.000125680343654282	0.000138611237182574	0.000119475301527834	0.000123177481470589
pos_2109	7.47246522198099e-05	6.49697814431792e-05	4.61371916538487e-05	5.35803155576324e-05	6.54662541103393e-05	5.65572105041583e-05	5.06858351595253e-05	5.637652079292e-05	5.61936965044454e-05	4.18946577298835e-05	3.42877600443982e-05	4.4962457825152e-05
pos_841	0.000311503515325723	0.000296807476175022	0.000223292906655179	0.000269274779458473	0.000310391620608564	0.000256722458369563	0.000262216809676373	0.000268814288457315	0.000286541690684461	0.000262834451533554	0.000199411524107886	0.000229071664319523
pos_107	0.000151490010039457	0.000211260915116656	0.000102466999656699	0.000169091399700766	0.000260406503380859	0.000134213918630688	0.000137893598976338	0.00013715045572474	0.000103305386915879	5.18515099828944e-05	7.16071816742406e-05	4.37213602160968e-05
pos_1140	2.2901186222075e-05	3.0272290577616e-05	1.14103120878369e-05	1.65711829316501e-05	4.6891298583239e-05	2.04703569829563e-05	1.3876221230749e-05	2.58303236804164e-05	1.00482930718052e-05	6.54238048184648e-06	9.8877927459786e-06	5.27856590930183e-06
pos_1368	1.83898722185486e-05	5.94463922817574e-06	6.13665070420939e-07	6.50027549007252e-06	2.97140099125371e-05	4.91497284627991e-06	1.72482269308471e-05	7.02330149916486e-06	2.536549891259e-08	1.39719236069853e-06	1.70832327473927e-06	1.38168195829853e-06
pos_1998	0.000147032126055515	6.8438251906686e-05	6.31460518140218e-05	4.35000032971882e-05	0.00016216767190321	7.39665928458984e-05	8.77953524493747e-05	7.70690178998009e-05	6.0845689386799e-05	3.66398572149115e-05	1.80217001211618e-05	8.46022406734766e-06
pos_2614	9.05533321730807e-06	8.14008722493443e-06	7.98905405480313e-06	8.86787264993559e-06	9.35858868770022e-06	8.06460971736695e-06	9.5924540508493e-06	8.13915119824859e-06	8.08727932991682e-06	9.00326591543497e-06	8.3095380248906e-06	7.67070718798593e-06
pos_398	0.0304157310226918	0.0370582867396509	0.0269503756019216	0.0391470117250641	0.037381981593272	0.0284843108026613	0.0325051654125888	0.0249068899382498	0.0293115130805751	0.0283534543327731	0.0344285653711987	0.0274718974734259
pos_966	3.12460389882989e-06	4.02501151092373e-06	1.74452186399228e-06	5.27631932431173e-06	4.26875537687016e-06	4.20083265606714e-06	3.81996359296843e-06	2.39559897548787e-06	2.6145188279491e-06	2.58052444852175e-06	3.48347610631358e-06	3.33386591598109e-06
pos_2581	5.11238598427932e-06	5.56354859170235e-06	5.512610156894e-06	5.50380815822222e-06	5.54061509835234e-06	5.24000111923025e-06	5.49397173657182e-06	4.30363435184566e-06	4.34785367806144e-06	4.61758259017143e-06	4.56681867217786e-06	4.79909884348406e-06
pos_2340	0.000135974139443774	0.000132224712395954	0.000133482488793866	0.000149247213087234	0.000145909778605739	0.000120605471243034	0.000127697072440747	0.000106384808136613	0.000106627063737616	0.000109866187396225	0.000134589256907584	0.000129706017413007
pos_443	0.000233691992839301	0.000245132219096109	0.000226381083056679	0.000275743603721786	0.000254993861798488	0.000211852226844759	0.000232062688663756	0.000185053794462378	0.000198899611145562	0.000204166940714897	0.000237498886582208	0.000215586013099237
pos_698	0.000991050547480695	0.000813961323438916	0.000869909947417332	0.00114388790406267	0.00158084470483485	0.00089155780015881	0.00133638894257461	0.00132928474183864	0.000781198008155487	0.000791905141920287	0.000769010672484456	0.00136988322696543
pos_2122	5.23114122661673e-05	6.61860494865881e-05	5.18263345575681e-05	9.04131185582185e-05	9.84123655554039e-05	5.74295970930128e-05	8.71764070639232e-05	8.13568125371573e-05	5.56622102735305e-05	4.62680251228542e-05	6.13334743385158e-05	8.37076014029753e-05
pos_2481	3.08139700162343e-05	3.3609181910169e-05	2.96099164964361e-05	4.10908617044075e-05	4.20555534145686e-05	2.86824350475611e-05	3.95303491622409e-05	3.78924211542901e-05	2.70710028292846e-05	2.01504311599943e-05	2.61650086157998e-05	4.34559610668537e-05
pos_692	8.81833752087605e-06	9.11945774897101e-06	9.95166805328634e-06	1.25629335967814e-05	1.44900264312689e-05	1.03479965469292e-05	1.89726938402228e-05	1.60331745476873e-05	6.01434273972654e-06	9.46399646787797e-06	4.23148129084309e-06	1.36372213968164e-05
pos_1877	4.19735032777377e-05	3.84090468112887e-05	2.96926505206843e-05	6.57971778770263e-05	6.11479702723905e-05	3.22957082162594e-05	5.67899374111139e-05	4.73116385046316e-05	3.75527428666188e-05	3.54110472094531e-05	2.19137536897679e-05	6.00754296054173e-05
pos_644	0.000344122137731848	0.000311564398622452	0.000261987855786794	0.000420750311279888	0.000400894763734309	0.000284025523660952	0.000388889466742849	0.000396844013026753	0.000259169148353744	0.000350342831665443	0.000284996955134949	0.000404107008488973
pos_2025	1.12427478181628e-05	1.37123984691986e-05	1.1034877348056e-05	2.78406424707356e-05	2.72989025993846e-05	1.01415950170239e-05	3.21154285119862e-05	2.23259017457921e-05	8.78672976298007e-06	6.7879092587032e-06	2.50639890330059e-05	2.73293814279885e-05
pos_2027	7.35298566895993e-06	6.17683724826478e-06	9.57506131970197e-06	1.50682523960723e-05	1.62495361449432e-05	7.8984520057108e-06	1.47308210407475e-05	1.24238178014197e-05	7.98635256699231e-06	7.86520135364678e-06	1.16113123400317e-05	1.38339070780034e-05
pos_1050	3.05413245354179e-06	4.78830947158439e-06	1.56123685783382e-06	1.08121866553027e-05	2.98166526330824e-05	6.89497571708909e-06	2.67377848591743e-05	2.11903416894288e-05	6.5600688612823e-06	5.1795548620942e-06	2.94779821333209e-05	2.50637559369956e-05
pos_108	3.78775372116092e-06	1.82688113090293e-05	9.23534477713109e-06	3.84908284112322e-05	8.49582130333884e-05	1.09351704987591e-05	6.2976908725647e-05	4.17430306845687e-05	2.0370241796344e-06	1.71236608976507e-05	3.57014084103671e-05	7.69590820373692e-05
pos_1892	1.27824179754574e-05	1.20502880933244e-05	4.4540443394335e-05	3.97914996106718e-05	4.19098357006188e-05	2.01646237064945e-05	3.48563195236227e-05	3.1915986322656e-05	6.64729764461047e-06	1.23743473636353e-05	2.22714960691813e-05	3.30955921979514e-05
pos_1857	0.000207241032433704	1.91728127179022e-05	0.000286548118717452	0.00028077190391138	0.000440589993149029	0.000106611725781386	0.000337675903058598	0.000269232889687937	1.06989384326274e-05	9.7349183604498e-05	1.60481104108214e-05	0.000241362338933146
pos_2755	6.84014450656378e-05	2.87593767807755e-05	8.01302775200906e-05	5.83820118673346e-05	0.000116256817425742	2.65408353104735e-05	9.16049420824484e-05	6.25137491833304e-05	8.67664449948989e-06	1.99133764829804e-05	2.12610477792011e-05	7.36024015475985e-05
pos_2672	0.000347591036710439	0.000327047892749177	0.000746542628201516	0.000470350224343736	0.00106388485444809	0.000372800589643363	0.000628253401411172	0.000468582108813413	0.000290263742725009	0.000344121671354845	0.000276709601904694	0.000701895877091643
pos_1984	0.000371604868550072	0.000420070603368443	0.00144050857494063	0.00172895775378487	0.00302141091367934	0.000404395127362369	0.00186313222228631	0.000753720471452505	0.000388138575175155	0.000439595848441088	0.00032617398284123	0.00101557933062582
pos_224	0.000245119364503586	0.00025831556327589	0.00120321732395805	0.00145230157683969	0.00267262695816822	0.000271310622763872	0.00157644789140625	0.000581184568589861	0.000256805060727065	0.000288730925613434	0.000198361878475047	0.000820953603793671
pos_2680	3.04336249590677e-07	4.27089542476816e-07	1.05912516643588e-05	1.24724747560662e-05	1.99187614775294e-05	5.51692900533858e-07	1.21241226726522e-05	3.77550264310477e-06	3.4891757908147e-07	8.3898028349497e-07	0	6.76562756098792e-06
pos_311	4.73260994421713e-06	5.39339756696086e-06	9.01350582426328e-06	1.11178732637353e-05	1.52956772434734e-05	4.84755146680013e-06	1.05482999746714e-05	6.76454078752787e-06	4.4945035132473e-06	5.46666092858629e-06	4.57158799423378e-06	8.3419296581653e-06
pos_1088	2.26265739660345e-06	3.96131447372995e-06	4.29698679763036e-06	2.76221726519672e-06	8.26785297774938e-06	3.07362252810833e-06	4.92944987623281e-06	4.16349399814787e-06	1.2541344308847e-06	1.85808221680399e-06	4.46835936187634e-06	4.02361528007517e-06
pos_1823	1.44816853046485e-05	2.82334730359694e-05	2.41309253237203e-05	2.59563886615813e-05	4.31246151748593e-05	1.5193994501868e-05	3.37855165508547e-05	2.01261951896895e-05	1.17468221179745e-05	1.46950874602359e-05	2.84172494842616e-05	2.035720121594e-05
pos_1946	1.33689523227887e-05	1.54459421138921e-05	2.02783079555416e-05	2.362755812304e-05	3.62524236384399e-05	1.17622085743386e-05	1.82268898658428e-05	2.02753610346067e-05	1.17413345207605e-05	1.13281165965038e-05	1.98432481374343e-05	1.85517439686118e-05
pos_2056	7.80424336271419e-06	1.27954428919737e-05	1.31584179373823e-05	1.93449557797614e-05	2.17823262436596e-05	1.14045037706128e-05	1.70851811660206e-05	1.25477724553615e-05	7.27798909392904e-06	7.35375337549712e-06	1.13939545382865e-05	9.44095071385321e-06
pos_2740	9.31547370473195e-05	0.000181990623097861	0.000152867049094075	0.000122688324547439	0.000177207239047486	0.000122448275293624	0.000195445662167898	0.000156190624035131	0.000108341639390936	0.000159802819591472	0.00011020009802691	0.000143290417064979
pos_1068	0.000256315408306972	0.000467384706124616	0.000422923136947403	0.000274574382880544	0.000462868662184941	0.000337327107287331	0.000431787108479591	0.000344745062895244	0.000303270718411685	0.000283156459695236	0.000352274144028354	0.000349958961317058
pos_2149	1.06641987176e-05	3.40682536145318e-05	3.39971701278497e-05	1.86943972603723e-05	3.2165779343501e-05	2.06963023045575e-05	2.85299231149869e-05	2.04268700787957e-05	4.9443583034148e-06	6.37793361611532e-06	1.27978506907918e-05	2.5465726584697e-05
pos_2631	2.30563242279855e-05	3.30696507458647e-05	2.50196038190218e-05	2.21532788551299e-05	3.67169307804228e-05	2.31531840863414e-05	3.44116380222525e-05	3.19941937061356e-05	2.84093221712121e-05	2.16764064761061e-05	2.69157195299742e-05	2.75162460002868e-05
pos_306	0.0120507674866704	0.0205933479165707	0.0146156107107347	0.0113288402697543	0.0229652664940286	0.0134792150055096	0.0199689962433109	0.017931693919227	0.0138917223848389	0.0122883063319421	0.0115776238388694	0.015163411435472
pos_872	0.000170793242907397	0.00028649948924022	0.000210572956975173	0.000164247027728803	0.000336807270111473	0.00018845421385442	0.00029028544943565	0.000261864692878195	0.000191691939202173	0.000170605428714171	0.000160181256371338	0.000225074116229425
pos_322	0.00558069484515237	0.0104269599237355	0.00646931439773849	0.00581221109331251	0.0101651686803005	0.00543606110048982	0.00909397161880915	0.00839490794538671	0.00495609251665075	0.00534072600277927	0.00798591979178407	0.00783919706508203
pos_716	8.50918560179352e-05	0.000173461493517852	0.000106104271257001	9.2070322064846e-05	0.000192334772243538	8.15783517828843e-05	0.000166058088785314	0.000131999729467206	6.61323124667396e-05	8.24471143115015e-05	0.000125800732928003	0.000117232305082983
pos_2604	2.4972644399794e-05	4.23593870366917e-05	2.78348557399536e-05	2.37549413015651e-05	4.22716321299042e-05	2.59047784879948e-05	4.02524834423218e-05	3.55840244315269e-05	2.38032480482999e-05	2.54201141974624e-05	2.41388302053765e-05	3.02119965860262e-05
pos_1317	7.04973001533332e-05	0.00011443115944705	7.66735589359853e-05	7.53873262770238e-05	0.000114417989239475	7.48446207895527e-05	0.00010504134835483	9.698949181474e-05	6.83695146135636e-05	7.13548946824478e-05	7.6182975702631e-05	9.03841217838162e-05
pos_2848	0.000310383895180713	0.000515196485138234	0.00034893723109389	0.000323828089335385	0.000535417423450922	0.000338590492880795	0.000476415471745051	0.000444095562639742	0.000310905434297933	0.000323701434948505	0.000325973757482833	0.000396530931326576
pos_364	7.32010209053675e-05	0.000125215385142173	8.45559954196934e-05	7.73561343873344e-05	0.000132989164345813	7.98914964708867e-05	0.000114813483969075	0.000107780745674639	6.96839955791112e-05	7.43006067934245e-05	7.71511779603665e-05	9.24345673782215e-05
pos_2316	0.000162861914206007	0.000268282348906923	0.000190424449874108	0.00019251921745154	0.000277751087577364	0.000178352752394271	0.000247173713543034	0.000230022562702818	0.000154559873564942	0.000162720714561746	0.000193083446556627	0.000206824401143307
pos_1887	4.9550189732132e-05	7.98154300433005e-05	5.60982961821115e-05	5.09832152626698e-05	8.56447392562329e-05	4.9949659542925e-05	7.42307517431072e-05	6.78811868076883e-05	4.65369378386832e-05	4.58884276753859e-05	5.11860923515612e-05	5.91536720364751e-05
pos_2493	1.05440756427274e-05	1.80609903590885e-05	1.26146774558189e-05	1.0717121959238e-05	1.90036239507784e-05	1.05510332989713e-05	1.64014764301374e-05	1.5293032730623e-05	8.39002859034394e-06	9.96648958594254e-06	1.11559049112591e-05	1.27297829222479e-05
pos_1805	5.21293201883158e-05	0.000101521593578776	6.23936379023866e-05	5.02089581889148e-05	9.63016895922865e-05	5.02566900795618e-05	9.44177201633733e-05	8.21834736525927e-05	4.95876009278504e-05	4.61965526108461e-05	8.56623636499869e-05	9.50306239019724e-05
pos_789	3.74113939195627e-06	8.15865819679268e-06	5.69610070420909e-06	4.37004819898107e-06	1.08350618990939e-05	5.61984525218783e-06	9.73112241421872e-06	1.11008541265968e-05	4.75912352313128e-06	3.11163969080171e-06	6.28416973753884e-06	1.32194872681073e-05
pos_1278	0.00013912864910182	0.000241357899995707	0.000284327842172399	0.000326173860451405	0.00043887199605653	0.000161981437337455	0.000415742149348578	0.000225349364937808	0.000214838685598167	0.000274902819119204	0.000293001622406208	0.000173076054396913
pos_538	1.32804159853335e-05	1.75027567954181e-05	1.51686939956415e-05	1.73335059932873e-05	1.88690508509279e-05	1.47624928407634e-05	1.85291460616665e-05	1.61351462468185e-05	1.53196378317263e-05	1.56110578437254e-05	1.63204270068963e-05	1.5609542865906e-05
pos_1030	1.50006194693166e-05	2.500343685475e-05	1.80390130283816e-05	2.1293966480851e-05	2.77348794845154e-05	2.21685974572231e-05	2.70127601652787e-05	1.90571567842604e-05	2.11871145050238e-05	2.35002469005625e-05	2.65159635352961e-05	2.0473473916051e-05
pos_2164	0.000100586169639116	0.000113429636685022	9.49561357965793e-05	0.000110145169093128	0.000121232538573643	9.57680784596947e-05	0.000120281712922964	0.000103692060709169	0.000102261725071727	0.000104773404298097	0.000120439384923893	0.000105857266217774
pos_1065	0.000476443568174675	0.000528862192049414	0.000373715309317348	0.000595971791728165	0.000700744682964467	0.000417532075406124	0.000626208795270372	0.000594726250361319	0.000444095255899901	0.000385047212255852	0.000607797587199994	0.000337702726877087
pos_300	0.000400881696891731	0.000432348304162443	0.000511629690406722	0.000474429465630802	0.000776695486994779	0.000498066511942338	0.000611569412361917	0.000552606834945444	0.000579406146959451	0.000344884838489315	0.000682278393120289	0.000327756019698545
pos_52	0.000238620919983854	0.000282903323945906	0.000319068970871977	0.000317997517341968	0.00048117577068524	0.000328759960242235	0.000369767497121807	0.00034283059221155	0.000405412673011317	0.000258349263572796	0.000382356376816977	0.0002547505844129
pos_499	0.0001220273147553	0.000152793493742802	0.000161892546970291	0.000173278144895891	0.000248685416943156	0.000152849080719901	0.000199621653919405	0.000175514261104457	0.000158674963288286	0.000131722691800292	0.00021821705632745	0.000121046131461511
pos_584	0.000174441720764614	0.000153795756008002	0.000197953665816843	0.000212279033237798	0.000417715538233496	0.000202206452961568	0.00027427098050331	0.00025269169919509	0.000236115402238829	0.000201218658938377	0.000260402905000973	0.000157580853949674
pos_1193	1.25755117577039e-05	4.06400340502843e-07	9.75408685702034e-06	3.63963447847239e-06	1.28377994319121e-05	4.09114880872701e-06	8.48222617949732e-06	1.19606263383936e-05	7.28933145519653e-07	9.17425573205258e-06	6.56302637897225e-06	1.98381796981374e-06
pos_1586	5.81811040720406e-06	1.64746524336741e-06	5.01424239803321e-06	4.99696268081312e-06	5.83190709415525e-06	3.92671285420272e-06	2.18854206820317e-06	5.55813578540371e-06	3.95224286929608e-06	2.49329087224965e-06	3.98500723253615e-06	2.25716125548669e-06
pos_1236	7.95920540193564e-06	8.56464444417682e-06	8.21813897199378e-06	7.49642118966452e-06	9.27591399812564e-06	8.501382455938e-06	7.25767990051907e-06	9.21918174995967e-06	7.80364086874883e-06	8.11135437315039e-06	8.91338995645133e-06	6.56191653586186e-06
pos_2731	2.13280743649978e-06	2.71886080462635e-06	4.82574362768698e-06	4.91857068350647e-06	5.64031919967479e-06	3.08945909369549e-06	3.60603925528613e-06	5.10912697626294e-06	3.0567035978232e-06	3.81425978599546e-06	3.20797684876546e-06	6.69596731760669e-07
pos_1813	5.72454957552116e-06	3.26604857169769e-05	6.95758463153017e-05	1.91904013730521e-05	8.38261298123941e-05	2.64126778551546e-05	6.00295303725122e-05	4.23860619805084e-05	1.96728752545129e-05	6.22585069152787e-06	1.3117135371083e-05	1.38767754862767e-05
pos_830	8.99211543070126e-06	1.43024571858294e-05	1.68283797200518e-05	1.03749466410394e-05	1.87334246395453e-05	1.12097237767689e-05	1.42107780131476e-05	1.31452402953562e-05	8.60190776074709e-06	1.00640034526114e-05	7.40512906237002e-06	8.98793572186929e-06
pos_1428	0.000274735337700586	0.000325439656776066	0.000316867269241765	0.00026151702435539	0.000378162369558615	0.000260191586113282	0.000272677800874275	0.000265986437914571	0.000213165716057321	0.000195171005299132	0.00014958567199912	0.000197094135900606
pos_901	6.6561021944933e-05	5.76072793400567e-05	9.18151870039986e-05	3.56181024154409e-05	0.000139960825897567	4.68475423089396e-05	8.02484125779131e-05	6.51805014608139e-05	2.79011828000862e-05	3.75467812778316e-05	1.69559709286618e-05	2.36387121900153e-05
pos_992	0.000156899868608402	0.000177219038608602	0.000195919356654929	0.000154771620030326	0.000255875143880939	0.000153438661839047	0.000187193602952321	0.00017580853271695	0.000127079802969823	0.000123294176181926	8.76804038783517e-05	0.000133936070378751
pos_2409	5.56081603182163e-06	2.9839235410234e-06	6.61044740479185e-06	1.64860651512288e-06	7.2016183973862e-06	2.49732141040081e-06	4.33740336468357e-06	2.71405472991867e-06	2.04420176027783e-06	2.9548219999843e-06	2.13876141608214e-06	8.55228988014647e-07
pos_1309	8.9534843481527e-06	6.99805113265509e-06	1.26043944454872e-05	3.2012313508246e-06	1.49528661025606e-05	8.33647030811281e-06	9.98507361711235e-06	9.20127269392335e-06	6.12594773370443e-06	7.29661020501872e-06	3.13860346135632e-06	4.3690880524619e-06
pos_1967	1.11768470231135e-05	7.77732118898564e-06	1.49665784122258e-05	5.35733099320635e-06	1.51726048254587e-05	1.00116494123963e-05	1.1110281587688e-05	1.10618727134586e-05	5.65992324056351e-06	8.6932976897136e-06	7.52276755626137e-06	4.45178079753873e-06
pos_1464	6.21371490972505e-06	5.59250355242077e-06	8.81003654408211e-06	3.69440358058765e-06	8.37116054566304e-06	3.56455484570823e-06	6.33727530320368e-06	4.39168421865174e-06	4.81960336675853e-06	7.33154072938898e-06	3.56283271844803e-06	3.95248606603502e-06
pos_2183	3.45389970969578e-05	2.72332216242187e-05	4.48199560153389e-05	3.14265009612004e-05	4.61433829816745e-05	2.72212721847459e-05	3.93732266537002e-05	3.58810724538911e-05	2.87392071507409e-05	3.77102443985278e-05	2.52630513673872e-05	3.24764252815007e-05
pos_2679	4.54613515502366e-06	3.94909371733196e-06	8.96601547492148e-06	4.89284666739301e-06	8.65804024294666e-06	4.32709509504909e-06	5.67147200858763e-06	4.69301440429001e-06	1.71244690841797e-06	7.71415661843228e-06	2.17980260279104e-06	2.94790874054022e-06
pos_498	6.70131270325825e-05	5.2002475396746e-05	6.07690287549578e-05	5.26969264904997e-05	6.13277019215371e-05	5.64163340563594e-05	5.36102377314601e-05	5.76483992435896e-05	5.89691174783698e-05	6.21725171570197e-05	4.35015196136471e-05	4.83113062297691e-05
pos_596	0.00043050466431318	0.000291286712268489	0.000336526604386629	0.000341357967751976	0.000447462227999776	0.000309331667781071	0.000371633365856943	0.000326197736501811	0.000391114804972863	0.000396653633343979	0.00026022389660324	0.000280841787904368
pos_678	1.36191399605411e-05	1.2068648254828e-05	1.54686300224511e-05	1.51940514718437e-05	1.77820820524747e-05	1.43946397886656e-05	1.23364231853683e-05	1.19976716971501e-05	1.47228429338735e-05	1.23223866926236e-05	1.07917230086903e-05	7.16338600409286e-06
pos_1053	0.000377622751092367	0.00024374083359807	0.000491933272263962	0.000330362429322766	0.000483518032929507	0.000367733956907418	0.000363545410655954	0.000311991908719469	0.000426373391695709	0.000168644014344577	0.000221812722810056	0.000168908051351534
pos_2815	7.30532840085533e-05	5.84971278589907e-05	7.15923443558943e-05	6.0488616637537e-05	8.55552708020682e-05	6.63315496669185e-05	6.32190985666596e-05	6.3429826042325e-05	7.10186645021956e-05	4.9622654615533e-05	4.40665582057343e-05	4.98927538171646e-05
pos_128	0.00956558682159917	0.0143297336343759	0.0134292719554022	0.013063516863591	0.0160254196754113	0.0121394465314152	0.0127535159539324	0.0125514098279118	0.0136819585983459	0.0133394586205607	0.0102240649876713	0.0106102718475036
pos_1127	0.000284122315862938	0.000439178697424055	0.00036642503477518	0.000363195343851445	0.000559934531808377	0.000357659054770402	0.000428727106197649	0.000453171014557383	0.000427814996000948	0.000432440428959989	0.000234789331557595	0.000234476615781695
pos_2784	0.000433133067011865	0.000609013686443929	0.000595831936410389	0.000526935328089538	0.000831367802342218	0.000509622552836068	0.000622241222433037	0.000620070477031532	0.000551704928471423	0.000570689374699338	0.000334033062623358	0.000354517884909671
pos_1666	4.1687988350618e-06	1.05105567210309e-05	4.74523764292399e-06	1.26929645698226e-05	2.20692649365523e-05	8.95389388389224e-06	6.6424215276938e-06	1.14401285172593e-05	1.19597276066396e-05	1.40918728939529e-05	8.47709174694284e-06	4.71664554004009e-06
pos_1961	2.24797596234739e-06	4.36317794658196e-06	3.99483339731665e-06	5.54396655533109e-06	6.68217700144557e-06	4.37050816202117e-06	4.51118574250379e-06	5.20078918992936e-06	5.14159294019862e-06	4.75525521506014e-06	3.95043843379779e-06	3.86148600154103e-06
pos_369	1.30373070211055e-05	1.540129293015e-05	1.03874980485021e-05	1.52654721293832e-05	2.0767584139404e-05	1.32556268360622e-05	1.7149072423779e-05	1.70427887716273e-05	1.58728311946136e-05	1.6406870431263e-05	1.17806153979189e-05	1.22217649451441e-05
pos_38	0.00299085974483149	0.00331211716869942	0.00241983905277594	0.00352561023125064	0.00570671047199091	0.00302510488226318	0.00386329923290998	0.00401722663655608	0.00365225807591462	0.00412698402218457	0.00261205710860345	0.0016030004551979
pos_259	1.74795508773294e-05	2.39357856677179e-05	1.65337397417784e-05	2.29261432781532e-05	3.11100161243635e-05	1.89050555617991e-05	2.46069352693525e-05	2.24199626534121e-05	2.06312853572244e-05	1.83720843466101e-05	1.38412274664502e-05	1.38045949611583e-05
pos_378	0.000454378292763916	0.000572452584415887	0.000482751298853779	0.000548069500856292	0.000609970599103845	0.000485576223673235	0.000549248087305358	0.000545129524627621	0.000489279188833747	0.000554800645216923	0.000419011325531331	0.000446583536903603
pos_203	0.000132741818793857	6.37044631350504e-05	4.92931656244339e-05	0.000177193460466096	0.000335233952144765	5.62503496940162e-05	9.543427127498e-05	8.00136734769641e-05	6.00222196820476e-05	3.72743621910761e-05	7.66613641801237e-05	6.94707569540564e-05
pos_2801	0.000874883196018017	0.000808385440133148	0.000857159851532075	0.000888128149027762	0.00103359608066165	0.000836877670387435	0.000872068416192902	0.000846297110074959	0.000778342568697492	0.000782785852517504	0.000800026227927467	0.000908205440892715
pos_295	0.000289338178295592	0.000304044026560969	0.000311765051221819	0.000423232092210875	0.00113427976830182	0.000293490069419141	0.000473876099604433	0.000397255809098748	0.000353287713237636	0.000273728973574333	0.000270874698121129	0.000578282378889457
pos_523	0.000104701682593734	0.000124320705856162	0.000124723760690874	0.00015629042789099	0.000212325399435373	0.000113888406446905	0.000167409274951635	0.000132445892043721	0.000128358026255926	0.000117156094281564	0.000118261948232223	0.000135618477286002
pos_2226	7.53995883283602e-05	7.89418944507548e-05	9.96527197762701e-05	0.000115102788203717	0.000186815981350436	6.5205099775442e-05	0.000132565861306094	9.88364589332852e-05	7.68478885894957e-05	8.25813885034055e-05	7.30218372098261e-05	0.000103503562631583
pos_569	3.02009666744969e-06	3.16101124020039e-06	4.62304557004538e-06	7.4545635491191e-06	1.45906386321681e-05	3.28955630337819e-06	8.17567585396086e-06	5.28558516659657e-06	3.68383855749779e-06	2.9062206647172e-06	3.62223663822921e-06	6.47078659710528e-06
pos_355	5.01966682476533e-06	6.01830556155366e-06	1.18748767743499e-05	1.57781317469681e-05	3.4725884977851e-05	5.52437629243271e-06	1.92314855732834e-05	1.03835436074451e-05	6.98137159648489e-06	5.21255603879189e-06	5.08755099389006e-06	1.27153231260111e-05
pos_31	0.000561989528727867	0.000630987640626864	0.00188911741055201	0.00329012302650722	0.00977120173406569	0.000655413620473975	0.00424189181160187	0.00173089468632442	0.000842749156825843	0.000547218107029077	0.000519117710745463	0.00257660609928002
pos_98	0.000299369885033566	0.000312450988224534	0.00115910302535461	0.00198646760394563	0.00557356396273543	0.000355318061079944	0.00261068465265924	0.0010520017115658	0.000479608713765577	0.000234661480110084	0.000257380898583894	0.00159446404893244
pos_1633	0.000159379367504349	0.000183401989900968	0.000213731043092909	0.000225713467567169	0.000318394322657193	0.000168610103711334	0.000234845069770126	0.000193225132662388	0.000165046142573777	0.000193238291807224	0.000154698471403379	0.000232211492262035
pos_2388	5.63180481419547e-05	6.68987874057057e-05	7.58033909396618e-05	9.54412918124529e-05	0.000147526780909741	5.45547848160515e-05	0.000109232925816315	8.65664332553675e-05	5.67611251367099e-05	8.83317074936292e-05	6.24494930929475e-05	8.92508223399601e-05
pos_1878	2.79921133933176e-06	2.64195719880272e-06	6.40538748190744e-06	1.09936800026234e-05	2.10830993248764e-05	2.16521993632177e-06	1.06088306992744e-05	1.58349182974329e-05	1.1630285569869e-06	1.20814007541974e-06	1.49592524057624e-06	7.70444353794624e-06
pos_1643	0.00136558368433184	0.00112288270810912	0.00137908268799373	0.00168871281252921	0.00209937118917144	0.00143232484508309	0.0015001887296781	0.00162841223424897	0.00117375777808562	0.00108708412526509	0.00110718632956502	0.00143503074960802
pos_1917	0.000119273773592025	9.364225030884e-05	0.000129007367765583	0.000150717419275161	0.000199888085784674	0.000119197334859798	0.000153731121093064	0.000154289162044842	0.000106436028235151	9.38370821228119e-05	9.52876515081652e-05	0.000145279763124455
pos_279	0.00114900308621982	0.000803101187826185	0.00112740535689989	0.00134770149088008	0.00180374941634016	0.00112551830644579	0.00131907217601089	0.00141470900428277	0.000925945331740467	0.000904091260710648	0.0008574299951002	0.00140859114426971
pos_760	1.32690845071985e-05	2.03926340514541e-05	1.37919495749052e-05	2.60256002751565e-05	2.85954473590035e-05	1.43411047097191e-05	2.07789572534062e-05	2.12788302416365e-05	1.58814542573125e-05	1.72148863322547e-05	1.08062389123216e-05	1.6478917485083e-05
pos_1351	2.3035408682377e-05	2.13801697994952e-05	1.76366283178207e-05	5.25061922141539e-05	5.12636503859076e-05	1.57909754403001e-05	3.33282324464124e-05	3.30485603454829e-05	1.90088976699097e-05	9.78353023097308e-06	4.93267348738042e-06	1.06366986049921e-05
pos_963	3.34582456441859e-06	1.76019251121238e-06	1.08806344507762e-06	2.27011202466147e-05	2.17342958792564e-05	1.01635341164324e-06	1.14213360102459e-05	9.90608485694238e-06	8.88687809860171e-07	2.76889810024298e-06	5.38043283148596e-07	0
pos_2554	2.68822581672191e-06	3.07997062670546e-06	2.88703141514821e-06	4.18133554812681e-06	6.57422552541767e-06	1.80360182017325e-06	3.14348888086015e-06	3.26088871288975e-06	1.33047655697517e-06	3.37934566747709e-06	1.44278422192959e-06	2.48113420115545e-06
pos_1495	2.7239912664624e-05	2.85846513104778e-05	2.09381533267035e-05	3.4881334148068e-05	8.08308470322769e-05	2.12336178709015e-05	3.70136084881363e-05	3.97719851330087e-05	2.92731877559642e-05	3.9404555727847e-05	1.96528127412068e-05	1.63648102538405e-05
pos_2327	0.000368100283686745	0.000351243318524951	0.000364811882437993	0.000444978046984619	0.000619918454619391	0.000326871486159312	0.000438848304314384	0.000453446053916211	0.000359595157956941	0.00045558082275077	0.000311723578216857	0.000326987530007893
pos_2447	2.31809863394626e-05	1.68118526066031e-05	2.15490000989338e-05	2.93480915364013e-05	4.66765717519064e-05	2.48220411469834e-05	2.77757692397742e-05	2.92378240877724e-05	2.66690191780064e-05	1.45283036969128e-05	2.16875307192583e-05	2.47614876343263e-05
pos_63	1.03667095802709e-05	8.39059230870901e-06	9.77050225431448e-06	9.66339131735332e-06	1.44390640726621e-05	1.07322191682811e-05	1.05676353613802e-05	1.09483792491851e-05	1.11403399164706e-05	8.98936458440119e-06	8.32742772950019e-06	1.08798219461982e-05
pos_273	0.000116649392258678	0.000128082946033019	9.89093569682492e-05	0.000130132702933533	0.000161377632647948	0.00011994361664337	0.000142418926589389	0.000130195268806435	0.000148713364557041	0.000105037987459771	0.000105904266827121	0.00011949442002986
pos_702	0.000106038853478111	6.36864620342559e-05	4.95657797514191e-05	6.79994088839095e-05	0.000149841595003453	7.28136212937573e-05	0.000102057710627905	7.97995939389615e-05	0.000100499483906207	1.07251277781293e-05	1.04851283264126e-05	4.73790494587765e-05
pos_71	0.001590267248154	0.00185131798160443	0.00192142760215945	0.00229403956594142	0.00292279971227078	0.00165523535723641	0.00316064783401917	0.00236162036660967	0.00136901069539682	0.00133383480448326	0.00109883343622668	0.00156205722808701
pos_806	5.44318300704795e-06	7.94883998825168e-06	1.19695178024044e-05	1.45979998649e-05	2.40118799640582e-05	3.46063669690038e-06	2.19302712184242e-05	1.41267154417351e-05	2.65830048823034e-06	4.55848847859621e-06	8.23520139561596e-06	6.47776556045351e-06
pos_416	0.000109498747680866	0.000227896529539198	0.000143586623873032	0.0001911694148929	0.000485628581848269	0.000113452058137876	0.000488720315045481	0.000134357684793777	0.000144491880826264	0.000142642816224674	0.000163271918566575	0.000148709158372027
pos_122	0.000744432693421582	0.00139284137338049	0.000849109847668764	0.000844113838468565	0.00225033079697748	0.000633091498444832	0.00260738071814385	0.000722707450698383	0.000995175229361018	0.000779218126890647	0.000722670538416346	0.000538536275679211
pos_86	7.89031442268668e-05	0.000139330377561209	7.85449987846475e-05	9.02075030545051e-05	0.000242841018298443	7.20323628764274e-05	0.000288786148704657	8.58102082393467e-05	0.000121994870642122	9.89842674406451e-05	8.4177943523702e-05	7.06499344503125e-05
pos_632	8.30151727352664e-06	9.49867424972946e-06	6.94166808737125e-06	7.20774741756862e-06	1.41342072452094e-05	8.31644913670453e-06	1.41509946367229e-05	9.69012603276646e-06	6.8516695690348e-06	6.22747193165916e-06	6.34948561640731e-06	1.09971364568657e-05
pos_1375	0.000149423863082705	0.000206605961466955	0.000155242634599261	0.000177755440418584	0.000269311673112893	0.00017091433106524	0.000241852240413771	0.000192645867807034	0.000132244364865358	0.000137529256797135	0.000132932608977143	0.000155638910445327
pos_59	0.00477500413107303	0.00600304076101079	0.00547041431492711	0.0063179932073182	0.00970570895336915	0.00498875179768075	0.0087655758858821	0.00671447913101434	0.00417382264221376	0.00378494890964076	0.00380371677298607	0.00480797322167162
pos_1577	4.50761190582334e-05	5.3946012978328e-05	4.88751283236021e-05	4.49608579174202e-05	6.02851497753293e-05	4.73416620956311e-05	5.47440409860796e-05	4.88395299688381e-05	4.54123496107853e-05	4.84007096586657e-05	4.35945702685142e-05	4.23926429967971e-05
pos_197	6.02319271523333e-05	0.000267534939037873	0.000222860836899508	5.93755918863959e-05	0.000436197207864248	0.000128858306312428	0.000285716556646832	0.00022185249680222	0.000125685115640383	5.53089183560567e-05	5.41108243239207e-05	7.00584813167757e-05
pos_1986	8.04756303356965e-05	0.000121423669393084	8.01272266657229e-05	7.72594029715695e-05	0.000180304233377729	7.96035404539519e-05	0.000110579681340398	0.000104928036588063	8.56400783427822e-05	6.646108857507e-05	4.78793490034611e-05	6.3977195612451e-05
pos_332	3.05353734830962e-06	6.03991970822285e-06	3.38509579980247e-06	1.88209762352937e-06	9.97624990809003e-06	1.88564978096068e-06	6.49242839736574e-06	4.5739452599673e-06	3.2305356572852e-06	3.87818224437326e-06	2.27818669486772e-06	3.05224126648463e-06
pos_1111	3.68700298951886e-05	4.36711143151978e-05	3.97009119435493e-05	3.17071074912861e-05	0.00104800478639478	3.14942863943825e-05	0.00044738959164134	0.000302737116599381	2.78684382529368e-05	2.85653600017452e-05	1.89431433666181e-05	2.3287784083775e-05
pos_312	2.99102116680013e-06	1.33685535389428e-06	1.52955010838755e-06	2.87920695554998e-06	1.21671271966693e-05	1.9408035629611e-06	5.33304628175138e-06	4.68129882774372e-06	2.00495331606937e-06	1.96446312837142e-06	1.85234483149978e-06	1.31213926126176e-06
pos_593	0	0	1.82179650556977e-06	2.8239875112424e-07	0.000154440885196523	0	0.000112100883115947	3.50120300622161e-05	0	0	0	3.42689200099971e-07
pos_2420	0	1.08131334131202e-06	9.77260329314577e-06	8.4983775077695e-07	6.47852893478406e-05	3.8062810071973e-06	4.07154150923019e-05	2.65402726392721e-05	4.48829355736841e-06	8.69662861344325e-06	2.30734425740459e-06	1.02486609514875e-05
pos_1645	0	0	1.95660208234629e-05	0	0.000172531415981951	1.63487232297772e-06	0.000102641217331303	4.96795931878143e-05	0	0	0	2.91251027465481e-06
pos_2761	6.04505375612756e-05	4.231742721866e-05	6.50211043413814e-05	4.4064966894535e-05	0.000269409130980949	5.12620781994116e-05	0.000170789649323227	0.000126015847479443	4.758377941847e-05	5.50293517233045e-05	3.74546656415774e-05	6.17589094139949e-05
pos_68	3.32326556089722e-05	4.37864689187511e-05	0.000106210005365124	3.33211491299787e-05	0.00269069924247092	4.74055081273276e-05	0.00155163296413404	0.000980606604310935	3.21966555097607e-05	2.78543847064148e-05	2.48474000837116e-05	9.97928299039796e-05
pos_1537	6.69914892044677e-05	6.36161497048928e-05	5.94923088277146e-05	6.3926018000137e-05	9.76846956783469e-05	5.99459165709283e-05	7.56896442150788e-05	7.58366433480132e-05	6.25144763898645e-05	5.63250255097165e-05	4.61037335326694e-05	4.09304236478106e-05
pos_1397	2.65911707281154e-05	1.37332970356156e-05	1.81379135113827e-05	2.47080764053181e-05	8.2194410937336e-05	1.68474768246097e-05	3.95378746917453e-05	3.4338581581159e-05	1.21071728812781e-05	6.98886337784321e-06	6.95819882434727e-06	1.24528382291068e-06
pos_2230	0.000243513916796587	0.000195902638768357	0.00012352584471655	0.000261105533150883	0.000697716968074904	0.000183680087644128	0.000399915900529054	0.000304849514856002	0.000191857834976668	6.11364027757567e-05	6.8328425824287e-05	2.96384285926176e-06
pos_2292	0.000185478622966706	0.000110690998664448	8.29053033697613e-05	0.000100663904500502	0.000651686846987198	0.000132760060340468	0.000358869341225656	0.000267016585653678	0.000145405080803264	7.3847658629377e-05	7.58645463079893e-05	2.96201652928862e-06
pos_664	6.84814096705035e-05	2.8272873950208e-05	3.52163725457263e-05	3.54397229821669e-05	0.000141765636568425	3.82283252488609e-05	8.45799391074499e-05	6.55304167564071e-05	4.3372899932027e-05	1.48530996335767e-05	1.23027610144326e-05	1.87296363685284e-05
pos_135	0.00028219052587091	0.000237526266822087	0.000229327687949681	0.000284480114025575	0.000482333114813914	0.000252811172449093	0.000361695335913765	0.000343538576855507	0.000299684189845267	0.000277944861038184	0.000192372339695398	0.000244510545152894
pos_679	1.97007264317338e-05	1.9467435451815e-05	1.90203403331741e-05	2.15472817269225e-05	3.36918710455543e-05	1.75785614203016e-05	2.52155451424681e-05	2.4057636040264e-05	1.68593804760388e-05	1.72102254789234e-05	1.34603901265774e-05	1.83531587708929e-05
pos_808	3.79494730207912e-06	4.37167043206166e-06	7.72687574639407e-06	8.81561243800398e-06	1.16356599319975e-05	5.48721792675902e-06	6.21551340963164e-06	4.02323879020341e-06	6.73807427346288e-06	4.37679684462625e-06	3.25415502550225e-06	4.97870350831171e-06
pos_2638	0.000104479802849284	0.000103161691244092	0.000176031151039962	0.000172820799167028	0.000202226184318192	0.000162666416851554	0.000162174198635727	0.000169186358071712	0.000135780975696915	0.000116691942639717	0.000115603477869147	0.000137089719874055
pos_705	7.76024484953493e-05	4.51833219174312e-05	9.60724834269833e-05	0.000117124857852418	0.000145187461304356	6.98443616268515e-05	8.51743365058171e-05	9.25524155351138e-05	6.54832497962747e-05	5.17850908605798e-05	6.31818079706812e-05	8.71159661218262e-05
pos_1536	0.000112971069146283	0.000117583351568936	0.00013960918073186	0.000162627956006422	0.00018209420710565	0.000142074178189556	0.00014285371145522	0.000147162877023359	0.000129980674789884	0.000100615914113628	0.000116487037867756	0.000125881617511946
pos_834	1.78613618425816e-05	1.31676139618269e-05	2.32439560863918e-05	3.43473648453915e-05	4.74613702712651e-05	2.75616632073365e-05	1.88130843990133e-05	2.72885947553268e-05	1.69229280312198e-05	8.15486901395277e-06	1.32897277886038e-05	1.9914915619817e-05
pos_22	0.00371059785949516	0.00307647757265096	0.00482827859737639	0.00487875643580297	0.00562559106607099	0.00468163412906954	0.00423129240645645	0.00476057552697837	0.00550001966205316	0.00444055865986892	0.00411121621840005	0.00422877707210239
pos_352	0.00770903016752279	0.00601591709426555	0.00864748285337493	0.0105476519949014	0.0102246710891441	0.00952639632642864	0.00758183582167656	0.00901424385395034	0.00849648734948203	0.0071800824232425	0.00717118689559943	0.00741217693955996
pos_793	1.16700972601404e-06	4.64924545431314e-07	7.55514656142029e-07	2.24986890390449e-06	3.98001401318848e-06	2.4852896666329e-06	2.0831457647835e-06	3.36489290624688e-06	4.8793432354e-06	2.71014534228185e-06	2.79453583207232e-06	8.44114995237718e-07
pos_1443	1.48026104285618e-05	5.84231531342804e-06	1.60217276313887e-05	2.42155795404148e-05	4.06747556049016e-05	2.04586130487497e-05	2.36087572698905e-05	2.69849913803945e-05	3.82790248831603e-05	7.22383155703889e-06	2.23080776978103e-05	1.44389440195688e-05
pos_525	4.40772350459278e-05	3.98037565817332e-05	5.1412029742948e-05	7.07772377119221e-05	9.54642911993177e-05	6.12747857102854e-05	7.09777020685043e-05	7.20872317006727e-05	8.46798366333504e-05	5.69218782234482e-05	8.26323848300024e-05	5.12810987659365e-05
pos_954	3.78018387805029e-05	4.49041896432237e-05	4.12901880639364e-05	4.24000686128336e-05	5.01865984037481e-05	4.6336672275165e-05	4.92298439089944e-05	4.90357666183538e-05	5.01673803451172e-05	4.56532272233892e-05	4.44414678173575e-05	3.98401852366099e-05
pos_2233	3.97241333157718e-05	4.64428228121863e-05	2.13600606552801e-05	1.15749241286857e-05	0.000319354710893287	5.99608486258831e-05	0.000200494599131448	0.000172657272316623	0.000221251557367694	0.000175519567327438	3.8187165221488e-05	6.96806821383929e-05
pos_2567	1.86916581753196e-05	2.32391509617441e-05	1.52492697840683e-05	1.79777513644513e-05	3.63953661442669e-05	1.79144695337293e-05	2.77587205549202e-05	2.61121431279403e-05	3.89418165062847e-05	3.09339164059838e-05	2.0922219918081e-05	1.79330441737817e-05
pos_1656	2.36439943498236e-06	3.26678607256323e-06	1.19126488056312e-05	4.46071574390799e-06	2.71662582380538e-05	1.39426664300017e-05	1.45823699649534e-05	1.34455021925829e-05	1.88454742719494e-05	5.01549469323858e-06	1.09331147437155e-05	1.66073311497819e-05
pos_1074	7.41246626883363e-05	6.30209587896793e-05	0.000112836711365787	8.12473920405083e-05	0.000141975325089897	8.50015428757227e-05	0.000100832009255239	0.000103822166707404	9.55346294869445e-05	8.57165103864387e-05	7.6604573052796e-05	8.53410898646764e-05
pos_583	0.000321925359708052	0.000358087025734941	0.000495538531250355	0.000382560078094361	0.000692621262731968	0.000423508410027666	0.000553044510811446	0.000501816202817537	0.000628574903354356	0.000458846800230623	0.000375747415777573	0.00037778175707785
pos_2158	4.40548327089505e-05	4.87096694516003e-05	3.58098143223364e-05	6.21163889855879e-05	0.000129902559714265	5.31704747701709e-05	0.000105969454534642	9.73023897994007e-05	7.07315417162826e-05	6.61846885796234e-05	5.33129361740034e-05	6.49979019139092e-05
pos_653	1.36207931094873e-05	1.52532125751132e-05	1.12276845427338e-05	1.39765206876644e-05	2.14862309754213e-05	1.467294647058e-05	1.87004831609169e-05	1.87079502158321e-05	1.83333084020539e-05	1.52678212089331e-05	1.59967857481488e-05	1.61155391406528e-05
pos_2165	3.5903734172438e-05	6.24140987005419e-05	6.05196291979813e-05	5.93759151955627e-05	9.14991984788706e-05	6.79485716015405e-05	7.07323665545011e-05	6.76258944686424e-05	7.56054659752629e-05	4.9318032768954e-05	5.8209866581079e-05	6.19686415324732e-05
pos_2735	7.30951422286157e-05	0.000101723116164959	8.9077003158659e-05	0.000119632051228993	0.000173126184263709	0.000108943785582256	0.000131177702951061	0.00013362199531977	0.000158870515659584	0.000109726610639009	0.000105906065477977	0.000106259743866518
pos_474	2.61581484402873e-05	4.1363800006775e-05	3.48129056632035e-05	5.1317239346948e-05	8.3570776411693e-05	4.31222057965197e-05	5.66856306444175e-05	5.49552378060747e-05	6.27915564941021e-05	4.34895213511503e-05	4.16023644015544e-05	4.41155774495983e-05
pos_1720	2.01990518871537e-06	5.27837810689005e-06	4.84866143431312e-06	9.85687455618273e-06	1.23017882522485e-05	3.90289099711463e-06	8.21921502245616e-06	1.02711284390286e-05	5.87724486977586e-06	7.90830401737774e-06	4.33462836762712e-06	9.73017249343252e-06
pos_849	0.00564252252358959	0.0059265042038135	0.00563322002512106	0.00737456378030664	0.00934771530679631	0.00539566084616787	0.00766220717552571	0.00736855631143196	0.00680019615160024	0.00683509475704201	0.00611577358430982	0.00760723898602265
pos_1176	6.66875805786219e-06	7.44954550190186e-06	8.2494085322093e-06	9.80945721714828e-06	1.31304190694113e-05	6.28050202393656e-06	9.35110685086418e-06	9.38974836625896e-06	9.88825141955328e-06	9.11592246827236e-06	8.63624924448722e-06	8.00716960728467e-06
pos_968	2.26171641269009e-05	2.51760244858064e-05	2.57113633700723e-05	2.91209946638595e-05	3.35911400001531e-05	2.28237504263242e-05	2.70252133203652e-05	2.77454793888426e-05	3.44270211318229e-05	2.93151885277717e-05	2.55295645799573e-05	2.84174763908178e-05
pos_1615	2.97034406782987e-05	4.26751858501643e-05	3.13123528204733e-05	3.10429101299852e-05	2.96896753278467e-05	3.27922837013199e-05	3.25527796682084e-05	3.39212074167424e-05	2.93955264217929e-05	3.74241661111108e-05	3.63692192368714e-05	2.37789398308487e-05
pos_1801	1.24617112695528e-05	1.44298784094535e-05	1.22382946755805e-05	1.12042122794441e-05	1.26873850463375e-05	1.21689827657182e-05	1.33764992444398e-05	1.31336686168575e-05	1.11627227549141e-05	1.49696321101888e-05	1.33738038861187e-05	1.03556832573645e-05
pos_2549	0.00022861841819666	0.000458789887513757	0.000394485865773998	0.000327290413048308	0.000388174442661521	0.000314353686457029	0.000459502800579658	0.000420739989948233	0.0003305743860551	0.000477859980334896	0.000396113844600145	0.000301249265514088
pos_2034	4.31225122261622e-06	1.55171403404236e-05	1.0079573571492e-05	7.03542977463081e-06	9.07042255037923e-06	8.55234946141712e-06	1.2713715165873e-05	8.84885354383058e-06	7.82334412033692e-06	1.45872558571549e-05	5.51083825140688e-06	5.81923037401051e-06
pos_2299	1.54255667444901e-05	3.3856995248458e-05	2.4959821117109e-05	2.28798016263603e-05	1.70987737601672e-05	2.01509588043306e-05	2.46504629192701e-05	2.39965683703582e-05	1.89933967408921e-05	3.64635194178137e-05	2.1521995214458e-05	1.47691303755766e-05
pos_118	0.000130709892398887	0.000308579475960313	0.000223465762720542	0.000169249936075886	0.000249136475925548	0.000230581417960194	0.000189156860074903	0.000270073359849918	0.000259220620083501	0.000320615130899104	0.000210894466875224	0.000182440355888007
pos_2592	1.08905613159377e-05	1.78145043203552e-05	1.80278648684339e-05	1.40984368053836e-05	1.77832177966935e-05	1.34856063868507e-05	1.36296908171829e-05	1.73329621468878e-05	1.80588373438088e-05	1.87973231305542e-05	1.55682755799906e-05	1.35455963473884e-05
pos_2796	8.33202635938762e-06	1.34156074305227e-05	1.03805595562519e-05	1.14402261667259e-05	1.27558522067274e-05	1.08152088970339e-05	1.01974939704351e-05	9.15761140436514e-06	1.44349067888675e-05	1.66502236302485e-05	1.10750904861883e-05	9.44739584703193e-06
pos_477	7.28296186607106e-06	1.21079649818607e-05	8.03865824511026e-06	9.07354909135254e-06	8.92153353911968e-06	7.66466100540067e-06	6.86030615691842e-06	1.01067668206999e-05	1.160046731505e-05	1.38370108798411e-05	6.75419470652335e-06	6.81603653201991e-06
pos_313	7.38147648295993e-05	0.000752265297190563	0.000216284287107403	0.00016299077968461	0.000574752624901461	0.000193997878893388	0.000368579974269957	0.000609422774438156	0.000576933358909931	0.00125099028596355	9.460875596408e-05	0.000151102127918644
pos_66	0.000576361864217375	0.000872991262615206	0.000656593171138687	0.000671773526125478	0.000833902835091884	0.000758946353073769	0.000680020479904648	0.00082157067860241	0.000958138957873105	0.00117312695164009	0.000684315850568961	0.000602013259367142
pos_2043	2.94677797916273e-05	5.4877275974653e-05	4.41965750510115e-05	4.44055095586418e-05	4.57199732479837e-05	3.805477354984e-05	3.74109398154354e-05	4.14181378569132e-05	3.41930636400911e-05	5.47895594911465e-05	3.83883664658722e-05	3.66550929509356e-05
pos_2354	0.000132875624690278	0.000149136115948454	0.00014129979428607	0.00014226685020119	0.000145443516771697	0.000131501201482498	0.000122680367241143	0.00013931570664144	0.000134776641875588	0.000152371055146974	0.000138197091710108	0.000137901380590394
pos_2384	2.85814240986e-05	5.01070214202047e-05	4.24563147268801e-05	3.56303454938445e-05	2.54109879645517e-05	3.52112867499924e-05	2.99419971519163e-05	3.7320528528433e-05	3.50213504874462e-05	5.74845482190082e-05	3.3212091944228e-05	3.44991840703467e-05
pos_2495	2.11095426557735e-06	1.3766368814109e-05	7.45585448147292e-06	3.59476089549864e-06	2.7454878033119e-06	4.6946945806039e-06	2.18065286386368e-06	7.57752887583572e-06	9.39678934228033e-06	2.7429923704692e-05	1.78476470395949e-07	1.71936779705604e-06
pos_48	1.13340313050466e-05	2.00282560456467e-05	1.72641007927368e-05	1.53386406686877e-05	1.06729337957819e-05	1.45829965136036e-05	9.90517595758945e-06	1.39738829197405e-05	1.64512732515474e-05	2.54776932325692e-05	1.13620586594357e-05	1.11928292890142e-05
pos_690	4.72786457333103e-05	8.14728105151331e-05	7.31935704931177e-05	6.74690159934715e-05	4.74001669405667e-05	6.24613569278125e-05	4.20137475570689e-05	6.2190544314115e-05	6.68862945789461e-05	0.000104381364682598	4.32685128981567e-05	4.28731198827385e-05
pos_344	4.04955251553622e-05	7.25529701515681e-05	4.70387001297091e-05	4.18143207343164e-05	4.23579595691291e-05	4.90071786821265e-05	4.66079941362217e-05	5.15893027254388e-05	5.13070313439172e-05	7.80712891269402e-05	3.66321405509645e-05	4.818767770093e-05
pos_1985	7.8318006045478e-05	0.000132155833367526	9.3130641978998e-05	8.5063793798152e-05	8.46771954721927e-05	8.70548615049354e-05	7.4028367157881e-05	9.26976213103232e-05	9.51244207130928e-05	0.000131305028979744	5.0456803707516e-05	6.91344597338598e-05
pos_2076	0.000121020183792292	0.000223226511187943	0.000149085239837694	0.000119402893073898	8.51003017696947e-05	0.000132709981002531	7.77104343663455e-05	0.0001213126448898	0.000138958722037064	0.000216950463972787	6.10482937977259e-05	8.00885619959643e-05
pos_1905	0.000413274830484313	0.000258791020114456	0.000295092503158559	0.000174622660577447	0.000306866111918839	0.000291515972432752	0.000289983834997495	0.000334780957474246	0.000241806277349171	0.00060072978905	0.000209965043247201	0.000260394467729121
pos_2492	8.30399942172302e-06	7.509231405537e-06	7.65843198885685e-06	6.45825478069312e-06	6.84328051917302e-06	7.89084668205486e-06	7.27222470573264e-06	7.31932840276376e-06	6.39376226894116e-06	9.43826526527505e-06	7.251462622139e-06	6.75340594124197e-06
pos_2154	9.43947471220182e-06	1.61400662406367e-05	1.9586756477983e-05	9.37256066285797e-06	1.31963704738194e-05	8.86588200264937e-06	1.00240407209151e-05	9.32586646781506e-06	1.42585121352341e-05	4.18545666956977e-05	1.06322360472398e-05	1.27769210961225e-05
pos_2542	1.09896241895143e-05	1.24904172135582e-05	2.06594911205591e-05	1.7310662488263e-05	9.21055416265615e-06	1.3659416794747e-05	1.16977516211864e-05	2.10696395836396e-05	1.1491030725248e-05	5.42175174305388e-05	1.50788954293823e-05	1.31216448748649e-05
pos_543	2.39129333178087e-05	4.47380093894789e-05	2.14672540722598e-05	2.40737449268781e-05	2.15721741956422e-05	2.67973352535063e-05	2.50145711679169e-05	5.16072065428865e-05	2.86886463189491e-05	0.000140862608934724	2.0725629862753e-05	3.36646520549369e-05
pos_585	0.000438621327822153	0.000594926313720711	0.000425887662362368	0.000535905233383054	0.000529321079107219	0.000509001502892768	0.000550488689262437	0.00110253794843686	0.000710068975965633	0.00269786479696491	0.000615319322298814	0.000535497848055695
pos_80	1.29741489831768e-07	4.71488581526651e-07	5.21422692070065e-07	7.36011903063509e-07	2.3510280224479e-07	1.01970952162469e-07	4.60896655341829e-07	6.24619507206395e-06	3.93748816067242e-07	3.47250947561731e-05	8.84900869298086e-07	2.89211874857326e-07
pos_1166	1.54523656377695e-05	2.30353321215552e-05	2.30376297396652e-05	2.25539544085542e-05	2.08824165718144e-05	2.14101906417835e-05	2.08019215723215e-05	3.08533291292342e-05	1.85197432520951e-05	5.7438009301598e-05	1.93920862846525e-05	2.23292057192543e-05
pos_2497	4.1867302898161e-06	6.60732270084177e-06	6.82196906146685e-06	0	2.11359125008737e-06	4.2238537513956e-06	0	1.85404500249452e-05	3.63505769332061e-08	6.7194812060049e-05	2.24625489163179e-07	2.43091955575473e-09
pos_1033	1.79760620797199e-05	2.57784588767777e-05	2.01152618894345e-05	2.1526083522143e-05	1.48698217802675e-05	1.6737677783045e-05	1.38021768939549e-05	2.46666195805544e-05	1.43953389558529e-05	4.30252896156245e-05	8.79106904868518e-06	2.02892492084095e-05
pos_1352	2.7484524312487e-06	4.08493705002979e-06	2.66559191767664e-06	2.58512243940153e-06	3.04368811483279e-06	2.67650041940721e-06	2.25612406509945e-06	3.26067539179862e-06	2.64954467435271e-06	5.18875944269072e-06	2.40585776387901e-06	3.14781838338323e-06
pos_935	2.47537626456761e-05	3.24624478968275e-05	2.01577552872362e-05	1.80740520178519e-05	1.53478909417707e-05	2.24149503246038e-05	1.75121285753291e-05	2.35774054462644e-05	1.59666182067309e-05	4.14326830585369e-05	1.87516849845551e-05	1.77539211194199e-05
pos_2174	3.03094733208626e-05	4.57765872434096e-05	2.8973224880206e-05	2.82650219510926e-05	3.19031353176944e-05	3.40692889743372e-05	3.29537423305497e-05	3.99108357769723e-05	2.94026415094545e-05	6.2005614479467e-05	3.64184316116014e-05	3.83709484140277e-05
pos_262	5.29718341543191e-06	1.15089462808637e-05	6.71890376398743e-06	5.52660466888584e-06	3.70372007221334e-06	7.21764851190075e-06	5.35850879293618e-06	8.34414156533331e-06	2.42866917309858e-06	1.92562980724214e-05	8.76940486664575e-06	9.160394007529e-06
pos_1502	0.000117592607182848	0.000155476740368967	7.99604501454314e-05	0.000139928231633722	0.00011260425675157	8.16356293165536e-05	0.000141539632725705	0.000145031723297999	9.96551733646186e-05	0.000199457001047959	0.000124430243566759	0.000144527328613111
pos_1113	6.99532046500781e-05	6.94462005082805e-05	8.125182362927e-05	8.02868839081512e-05	6.83211200526863e-05	7.06058457743423e-05	7.30215672613618e-05	8.27403261278513e-05	7.04567381823745e-05	9.48518186162534e-05	7.27930094738459e-05	7.80319747376229e-05
pos_413	0.000106452085574319	0.000323617141835564	0.000353107644068208	0.000487965632063558	0.000312746580190652	0.000216249383676931	0.000272060648238689	0.00046765506936402	0.000149945453324301	0.000815250538381301	0.000172161955428825	0.000255403027919397
pos_1173	4.6725233567475e-06	4.03124956104254e-06	3.13382266253474e-06	4.21282328819459e-06	4.13212960573114e-06	3.99135745086751e-06	3.83261952349001e-06	4.18313821267656e-06	4.88349552466205e-06	6.14087552629792e-06	4.34089734338993e-06	4.90190422908859e-06
pos_1678	0.00259505628705893	0.00200869499196989	0.00239008605435897	0.00250864961058845	0.0020407739433884	0.00228281277821788	0.0019687490174695	0.00240350856971212	0.00248252757186305	0.00377165027352014	0.00272277037266165	0.0028893461443729
pos_2484	0.000101223314700819	0.000104792486396773	0.000125169101245074	0.000115881371332141	7.10039641302654e-05	0.000120013007346834	9.16141653293204e-05	0.000134817133448307	0.000143983457438949	0.000236149254164603	7.96633526369734e-05	0.000136834360375849
pos_700	1.15043949358866e-05	1.32082656219498e-05	1.48360355605824e-05	1.68062435827027e-05	7.73432931114024e-06	1.31828742964619e-05	6.12220117355298e-06	1.67738919435046e-05	1.60785220087485e-05	3.43073986968312e-05	9.52390327588847e-06	1.15143689027822e-05
pos_1465	0.000298060808034202	0.000308306461761247	0.000265572853307441	0.000286207950832796	0.000224279408882384	0.000294897199436826	0.000245490462272402	0.000271319978024003	0.000343645639514947	0.000400266181295923	0.000255507953473721	0.000250693841488546
pos_1013	0.00023957760883478	0.000336998962200162	0.000300744223137582	0.000373149085909829	0.000187323065049999	0.000332302368057264	0.000263334244137771	0.00036937799320492	0.000535031412238406	0.000622073540974261	0.000224990212454456	0.000353661978446681
pos_1221	1.01553565482658e-05	1.53394458821668e-05	1.3040520144071e-05	1.44792622841412e-05	4.02188171482553e-06	1.51902160413273e-05	9.81160848460546e-06	1.61918532730549e-05	2.86560387778068e-05	4.44356795723264e-05	6.15877895837802e-06	1.50952640470213e-05
pos_2202	3.28261667261905e-06	3.44702763379699e-06	3.14259247618784e-06	2.31591655010121e-06	4.7493202631896e-06	3.22433074165169e-06	3.35633917975686e-06	4.41817834778365e-06	5.05840739383282e-06	7.80571365224153e-06	1.57031847558196e-06	3.66638877518399e-06
pos_1544	9.9706469529894e-05	0.000157503145683247	0.00011680264824741	0.000108449144687068	0.000112473275592376	0.000134432222345831	0.000116338775851633	0.000189154125465807	0.000173740420831154	0.000261054580911855	9.76932032700066e-05	0.000173043998088926
pos_232	6.83912384499776e-05	0.000117059954665595	8.02603277829455e-05	6.92257935370149e-05	7.31619966231576e-05	9.529170947551e-05	7.63747056855997e-05	0.000134443913998411	0.000122302863029261	0.000188904198945283	6.87987754203305e-05	0.000124644916838896
pos_112	6.01415391333233e-05	0.000131747586482899	7.9042942086049e-05	7.52547751045857e-05	6.90257693794996e-05	0.000104040528510986	8.73760345642211e-05	0.000152742794127259	0.00014190716213136	0.000206964308262416	8.17747557657224e-05	0.000141495622725756
pos_2706	0.000466405761155769	0.000808578163036744	0.000590029417941922	0.000503187787318301	0.00051746234856388	0.000703469710907378	0.000598726313946634	0.00093967967269753	0.000887053586872959	0.00128817777548864	0.000547182627448363	0.000893031438279754
pos_1282	5.83022182144808e-06	9.51563599067805e-06	7.38134211987054e-06	7.4810495800482e-06	5.78122065302132e-06	6.90996158831925e-06	6.53494079080158e-06	1.07290476746594e-05	8.93989725126179e-06	1.43259258857345e-05	4.71485338449148e-06	8.04570452808457e-06
pos_2792	3.36049293825393e-06	9.12176553249598e-06	5.8536815220386e-06	4.49572971673688e-06	2.67506739930995e-06	5.84028084656219e-06	3.82641307415612e-06	7.27755122504538e-06	1.0682689384728e-05	1.61514860545941e-05	7.21356665568222e-07	6.90729420373725e-06
pos_2117	6.05239955491905e-05	8.91779837561626e-05	4.67931667680224e-05	9.87527117008009e-05	7.03882146516678e-05	7.12457531060092e-05	7.42871480959632e-05	0.000105237882911601	7.69121393779189e-05	0.000187457125119579	0.000123778381404438	8.70968285166266e-05
pos_777	4.43606781867282e-06	1.05351129929035e-05	4.93459027684852e-06	1.33336193810654e-05	6.51653612415438e-06	9.19890252118821e-06	7.73275523405609e-06	1.28908781427497e-05	1.08409800777121e-05	2.99994103474187e-05	1.26801515850153e-05	1.19281092186283e-05
pos_1524	3.08321877691417e-05	2.73504167772727e-05	1.7467361949402e-05	3.75222609887933e-05	3.74131948632115e-05	2.98656340679874e-05	2.88066289829039e-05	3.80717718473687e-05	4.57448797987397e-05	7.15485054335662e-05	4.32974316242995e-05	2.30410664437645e-05
pos_1659	6.6820657276052e-06	7.34377256156783e-06	5.1197913333794e-06	7.74246170525618e-06	5.45252281328195e-06	6.20221546194353e-06	6.17834877146806e-06	9.32337719329765e-06	1.03331136015566e-05	1.87273852356053e-05	1.14067538931306e-05	6.06283283289072e-06
pos_493	1.30133744940583e-05	1.45390656241974e-05	1.30042442623314e-05	1.47142654044785e-05	1.33111564996254e-05	1.39776017932269e-05	1.49776743537207e-05	1.423349561271e-05	1.54490667133743e-05	1.62927076546973e-05	1.51839541019051e-05	1.39881963069243e-05
pos_1849	8.07793583503549e-06	1.26003435124141e-05	2.0191087701515e-05	2.88967850880732e-05	1.16690790132747e-05	2.24202226763921e-05	1.9947000615495e-05	2.91536988213633e-05	4.55679484892008e-05	6.62883778362147e-05	3.73798915093088e-05	2.797759324207e-05
pos_339	4.40927045390849e-06	5.03170204619579e-06	4.38903438533133e-06	7.43668877636308e-06	6.64007715634311e-06	5.26366357171447e-06	8.02662267135548e-06	8.60451549158566e-06	1.00084771375939e-05	1.54642417432594e-05	8.30887307603543e-06	6.98708861330526e-06
pos_1086	3.96353834726837e-06	6.71277070187676e-06	5.03068245011862e-06	4.23585775414029e-06	7.92841909838451e-06	6.38822379027588e-06	6.08353300441985e-06	8.53512893355488e-06	6.81694841920746e-06	1.12923341496878e-05	9.41857263518503e-06	5.14692809809177e-06
pos_204	4.88814027300275e-06	7.17106581873897e-06	4.45379549079146e-06	5.17058994298267e-06	7.1532629548838e-06	6.11216363504351e-06	5.44862422169655e-06	7.41286944549562e-06	7.07246075240107e-06	9.26397334352415e-06	8.4711544086286e-06	5.47208978366004e-06
pos_2002	5.88572914300251e-06	9.65345511845164e-06	8.05100724805003e-06	6.8626307898701e-06	7.53429267546e-06	9.07859734660202e-06	7.98727112068427e-06	9.16514912779274e-06	1.13553874850521e-05	1.77139027880198e-05	1.09602632131702e-05	1.07381192026993e-05
pos_410	0.00437525144061444	0.00532066518794296	0.00447111821913969	0.00422226496311316	0.00441393907519631	0.00472920061298679	0.00485910303629336	0.00504352056391372	0.00484770506267225	0.00605521495821001	0.00486437748390228	0.00476249503242346
pos_72	0.000751173256464883	0.000944915057635538	0.000760601248323366	0.000891906707368798	0.000785031908281032	0.000845549649051623	0.000810801201420549	0.000883916672228177	0.000934612390803237	0.000972311805173099	0.000803430748828013	0.000789213064160627
pos_740	5.85153178161076e-05	7.02456114393657e-05	5.76728251613077e-05	6.83843183620597e-05	6.134876030523e-05	6.54170797619813e-05	6.7793315545622e-05	6.99798245726129e-05	7.45129250377935e-05	7.66789912274183e-05	6.38185619353912e-05	6.33392737272957e-05
pos_196	0.00024999995365682	0.000309201081500457	0.000256412801942215	0.000309015758925985	0.000245657819668826	0.000295561783495157	0.000257623532015817	0.000305374756491085	0.000318222996063203	0.000357741404010935	0.000269513666815374	0.00026606135890497
pos_2826	0.000404861636509009	0.000483038131866026	0.000419229981918149	0.000509718748852966	0.000403326072004339	0.000464681186265599	0.000446976676017693	0.000491376004129385	0.000521010997072993	0.000544688932606345	0.000451138118940161	0.000457709032308074
pos_881	3.25433686310523e-06	4.06051605040294e-06	3.43104082431935e-06	3.95600730329279e-06	3.30487490637989e-06	3.73317101277534e-06	3.47170803379351e-06	3.82562325887083e-06	4.36832193922064e-06	4.713458831318e-06	3.20328566453436e-06	3.60617182296344e-06
pos_180	0.000261051009976637	0.00031433141842704	0.000261179775814943	0.000291223465759997	0.000256180956054207	0.000288235682776544	0.000283062440105652	0.000301560696604535	0.000312505839364568	0.000338701576292874	0.000279295327645306	0.000281326843284253
pos_609	6.13268593789407e-05	6.86196093492e-05	6.02075900924594e-05	6.66293847013855e-05	5.91231748984328e-05	6.6306273398183e-05	6.37421188293782e-05	6.91833023321981e-05	7.35482144791538e-05	7.84154056259019e-05	6.2295827463967e-05	6.52594360285066e-05
pos_81	0.000116015989928382	0.000130553276458248	0.000110800459759268	0.00012873898167392	0.00011430229148844	0.000122806133995643	0.000124828370058281	0.000133420510992441	0.000137799370756874	0.000145466596297361	0.000116046833426209	0.000121542178173877
pos_1366	7.49093799587881e-05	0.000101168809196972	9.19548409346223e-05	0.000100952519615512	9.96645591203828e-05	0.000104732433851904	8.72235647282508e-05	0.000104948095875248	0.000107564658642619	0.00012082639579915	8.67575935486547e-05	8.30049751558049e-05
pos_2023	3.61201114078646e-05	5.29181884175766e-05	4.40582716428176e-05	4.94212275309775e-05	4.21237712110783e-05	5.06316084517153e-05	4.73606702716469e-05	5.1148084112559e-05	4.66979306389947e-05	5.8758320761467e-05	4.52373587616484e-05	4.17570489451419e-05
pos_2732	2.74393591434596e-06	3.36495919196954e-06	2.80290153500419e-06	3.2756050080796e-06	2.6971901309638e-06	3.14584119156963e-06	2.51512970680046e-06	3.64498128316018e-06	3.21006228274556e-06	3.71325633838502e-06	2.50690924972886e-06	3.35739447470041e-06
pos_721	1.63937086026899e-06	7.35448533859452e-06	1.94018275320807e-06	4.52937633623956e-06	3.54434989897288e-06	7.26677890799489e-06	1.50036536241073e-06	7.52584468427222e-06	4.25528895325979e-06	6.89792501421067e-06	1.55974133497183e-06	3.93478475726539e-06
pos_1667	6.38718472195445e-05	0.00010097940963295	5.10903685191579e-05	7.34704786407031e-05	6.71735134628036e-05	7.98088908741634e-05	6.86728575872906e-05	0.00011109292306772	7.86197518642519e-05	9.49016911727572e-05	6.9172858740221e-05	9.18798259333791e-05
pos_2435	2.24753427404525e-05	2.724324835939e-05	2.17194262482223e-05	2.33391757554535e-05	2.32574889264542e-05	2.47849335268606e-05	2.44098991645716e-05	2.59907533166469e-05	2.51053436148455e-05	2.75928390533056e-05	2.35019948035419e-05	2.72334529406759e-05
pos_1044	1.16750803603863e-05	1.74041849493857e-05	1.43621862859223e-05	1.51711960971822e-05	1.25936573676898e-05	1.49516045430557e-05	1.34719762888928e-05	1.62705380741971e-05	1.55457499249035e-05	1.77897620811349e-05	1.58470883845763e-05	1.71135078766226e-05
pos_284	9.07112088761872e-05	0.000141315089837222	0.000110399427132565	0.00012181597794895	0.000123789284780909	0.000123519233932231	0.000113990768190543	0.000138726856380071	0.000118697181288717	0.000151471308389706	0.000124041904543127	0.000148457303146485
pos_1563	5.3489717754977e-05	5.52650476417317e-05	5.74857116417559e-05	5.2478078783406e-05	4.74861500994766e-05	5.87550400700865e-05	5.57289557682116e-05	5.3276188799121e-05	5.36763096923107e-05	5.99235677002829e-05	5.771873224126e-05	6.33314493040139e-05
pos_1668	0.000258673887873408	0.000257763867564519	0.0002451147725585	0.000217513370310954	0.0001946568253492	0.00027173818294925	0.000235988033214815	0.000246629357341745	0.000249819483903825	0.000284115975797601	0.000258717956283284	0.000280649098022003
pos_1158	0.00167354398457423	0.00170610866701526	0.00151676998908912	0.00141692985722118	0.0012472056205587	0.00174186385580735	0.00159483573109679	0.00161095370815057	0.0016415314575875	0.00185589968652304	0.00172242064773414	0.00184176502157113
pos_406	0.000301064239315955	0.000300980275546456	0.000283749004220903	0.00025342467775976	0.000223244602088314	0.000306463499954706	0.000284770171337879	0.000281807142998853	0.000292506554876843	0.000331009789430326	0.000305200046777133	0.000331597962550345
pos_1466	0.000138208544290893	0.000140077398936398	0.00013184946281891	0.000117575990789082	0.000104764816016356	0.000142199695094175	0.000133511589799841	0.0001329006510864	0.000133108624239859	0.000153843530469054	0.000142303178596263	0.000150897844226701
pos_225	0.000396925678977738	0.000398410109505882	0.000367278088235955	0.000332823778172132	0.000292226131500842	0.000407616783583029	0.000374133847425055	0.00038306859582583	0.000385050663547021	0.000448219081840334	0.000412181906107489	0.00043748584400595
pos_1697	0.000239907155797156	0.000256389762174175	0.000222231431596781	0.000199716749806718	0.000173946784047897	0.000251099311097747	0.000230256179991444	0.000234677036624321	0.000216552557877786	0.000285793036643446	0.000247462343200507	0.000278034148713012
pos_1431	0.000139478196403485	0.000140232466046002	0.000135631218984116	0.000118750350793208	0.000101994699532006	0.000140809495101008	0.000134225701024944	0.000133975134490186	0.000132751667076805	0.000158291902281442	0.000145264041795434	0.000160657068716216
pos_2126	2.94470328063075e-05	3.12506413466355e-05	2.96372316683515e-05	2.66816462234062e-05	2.27136588227637e-05	3.11676894917513e-05	2.91403055519565e-05	2.9890703105451e-05	2.94951055523948e-05	3.64209769407456e-05	3.14030892230066e-05	3.5329907948511e-05
pos_1882	0.000600385099403999	0.000613447060791648	0.00052815791301476	0.00037684714950454	0.000302368622407031	0.000603263612760782	0.000552285504631489	0.000569490568498356	0.000378178675627813	0.000849166638828303	0.000613722141896291	0.000916967952098008
pos_2653	8.74118821189913e-05	8.31779640302273e-05	8.03130889959435e-05	6.9127200495674e-05	6.32457325037639e-05	8.70799419885248e-05	8.12991231525841e-05	8.9046502616249e-05	7.55333522440746e-05	9.72454164138909e-05	9.20816220131921e-05	0.000100920520390995
pos_1004	0.000327490794697234	0.000315296315648543	0.000181584705302854	0.000193419478373732	0.00016032175080653	0.000259374678213042	0.000265785271783621	0.000285777252556653	0.000205049280907728	0.00039475618961812	0.000403287167075199	0.000411026873674963
pos_780	6.14881969940003e-05	6.12468972137842e-05	3.48244756896624e-05	4.79257698826416e-05	3.4832739228211e-05	5.9705785108423e-05	5.3483552565344e-05	5.90563135153341e-05	4.15807866287584e-05	7.74297525381186e-05	9.98308392381382e-05	7.88607433951961e-05
pos_1318	0.000176174331844072	0.000178064962101222	0.000166826813774261	0.000174737708123971	0.000125215589890289	0.000178597746060186	0.00016244245702283	0.000167919886783104	0.00016260095370794	0.00019213156828298	0.000197283549066299	0.000196832166950055
pos_797	9.74098282751402e-06	1.02987339641388e-05	9.32303536011331e-06	9.56190261872453e-06	6.50473049576552e-06	9.37631122317981e-06	8.15904848004673e-06	8.88114341758611e-06	7.49810222989929e-06	9.73957734971371e-06	1.12669253671025e-05	1.09788764553245e-05
pos_1926	0.000540373907298384	0.000780711279997142	0.000835390688619478	0.000721713475649827	0.000615272000318006	0.000871048928010462	0.000701361812082495	0.000707448615937722	0.00073768780637041	0.000871981633588756	0.00105334643483915	0.000991463382810812
pos_667	2.51662438010521e-05	3.02962009302937e-05	2.85674424876353e-05	2.82283954625532e-05	2.75840937787269e-05	3.21099723462169e-05	2.82962134803731e-05	2.92027924849591e-05	3.04393847646694e-05	3.17483245605737e-05	3.16833049151314e-05	3.24082727235577e-05
pos_1937	5.07451722535593e-06	4.85281029151619e-06	6.05168970024091e-06	3.66666313649895e-06	4.16737481898311e-06	7.15987453934819e-06	5.5752248801832e-06	5.98466024975989e-06	5.82491277172949e-06	6.75928871413763e-06	7.05560328798261e-06	4.92248984874438e-06
pos_380	8.19008362084318e-05	0.000143965699437197	0.00016956984319763	4.84807326747526e-05	4.58173198426486e-05	0.000129584332658028	5.53893626401211e-05	9.49018461266509e-05	9.45020943523976e-05	0.000260611842338239	0.000211146223564659	7.0718896901312e-05
pos_1979	0.000339590887695498	0.000355820393801864	0.000410412904265629	0.000342271655276803	0.000337047227429983	0.000388971901837306	0.000355241508389342	0.000372474823672456	0.000392557414688674	0.00053811796505235	0.000564856998401551	0.000364148380225852
pos_853	1.54769820480489e-05	2.20625459590828e-05	3.34355583104327e-05	1.51966997200441e-05	6.70006766340986e-06	3.06901377709519e-05	9.40131876113152e-06	1.89078868960395e-05	3.50486151222543e-05	4.76413917813484e-05	6.03462606220167e-05	1.55785117647766e-05
pos_1435	6.86725863378854e-06	5.21884366312044e-06	4.14455991407715e-06	1.48655250576978e-05	3.45687915362548e-06	1.23701968629965e-05	3.42366351996854e-06	2.78613008268273e-06	2.86000372497837e-06	1.51298485756461e-05	1.33767283311509e-05	4.3134747976523e-06
pos_1702	0.000218401036935887	0.000215131886060313	0.000152699139260766	0.00047295953284918	0.000201797496683435	0.000297419130424203	0.000178186455521349	0.000300430135384774	0.000423004480919701	0.000476858555883738	0.000547426367213283	0.000211294280544556
pos_553	4.25421933703633e-05	7.51961345227452e-06	2.82367834432739e-05	0.000101191136040068	3.91471193184135e-05	3.31710133759963e-05	3.19660038749806e-05	5.67998860959448e-05	3.66570403855907e-05	7.51183530708437e-05	6.57593377283731e-05	3.35709599148199e-05
pos_1899	1.19213902522001e-05	1.17015607027979e-05	1.2795645856073e-05	1.14299260964761e-05	6.91123286441066e-06	1.27251366028077e-05	7.84265873337014e-06	1.22399272377404e-05	1.23708602862353e-05	1.52353829006076e-05	1.12151515883082e-05	1.04039022995409e-05
pos_920	0.000180366235691653	0.000171919935053565	0.000178781495833667	0.000165042712957458	0.000104549951468493	0.000190105229905631	0.00012666803967967	0.000159235201898316	0.000186058679679127	0.000233099821398592	0.000188709684343773	0.000133347563298101
pos_1490	5.52871745009169e-05	6.84348165333377e-05	8.16375693645312e-05	8.1867674309806e-05	6.36482675971939e-05	7.42037706044718e-05	6.26792758762834e-05	7.80022969858541e-05	8.04692875087803e-05	9.15535475530209e-05	8.703857841726e-05	6.79985649733955e-05
pos_975	4.98945576258402e-05	6.27752589707045e-05	5.97659958124646e-05	7.58252048745615e-05	4.97151033163376e-05	5.82210780047009e-05	4.72515736013136e-05	5.90976703379154e-05	7.10638499707988e-05	8.41958678500804e-05	6.46451619029511e-05	5.68797931333117e-05
pos_200	2.19687459989903e-05	3.35944518638194e-05	2.60075412506689e-05	3.26239773902518e-05	2.64404894723304e-05	2.53545043479808e-05	2.71950812241594e-05	2.80217705015906e-05	3.13219285862832e-05	2.38984070326303e-05	3.06169672388928e-05	2.47930123657414e-05
pos_2595	0.000440631711845507	0.00106542532991702	0.000588393598529989	0.000721344077249394	0.000578693197784452	0.000635925489581276	0.000537012454994328	0.000798753770572904	0.000925438981453857	0.000533329611067062	0.000961483506861328	0.000493918491921796
pos_2108	5.44518873708224e-06	1.15955393298556e-05	6.55707528513703e-06	7.55160465014856e-06	7.74569246973399e-06	8.29998377762797e-06	6.70749892183246e-06	8.76544143875036e-06	8.12693445572003e-06	8.42049199712159e-06	9.04953436478195e-06	8.45149230091401e-06
pos_2639	6.59858776798191e-06	2.06580966015575e-05	1.22337188039572e-05	1.52296840627033e-05	1.32010547711839e-05	1.73340800737099e-05	1.39182744598592e-05	1.7263408922975e-05	1.73741877442253e-05	1.92441132155473e-05	1.66266239263864e-05	1.37459450502179e-05
pos_2113	1.64718310161201e-05	3.28098120190852e-05	1.86158769154419e-05	2.37450286260539e-05	2.19554171472691e-05	2.42902230102253e-05	1.98134108662871e-05	2.43425287596017e-05	2.66499392184623e-05	2.83763957920808e-05	2.64239461909456e-05	2.32488524367236e-05
pos_1146	8.47239892865223e-05	0.000155847164350949	9.68454630025855e-05	0.000113086140570205	0.000103515328635137	0.000118961840770104	0.000118042771719072	0.000121810563324284	0.000130384728874745	0.000135496642751571	0.000143401406012619	0.000113360305802659
pos_2228	3.58055609564871e-06	1.06373175470737e-05	5.19156992262258e-06	7.01872053976047e-06	5.53233604819836e-06	7.27145763929625e-06	6.3521395525215e-06	7.47814489221442e-06	8.53577237553351e-06	9.30956290303535e-06	9.75607234381912e-06	6.87411068404669e-06
pos_2809	2.27229451419711e-05	3.92797101036321e-05	2.64065406207524e-05	3.11868098841446e-05	2.7739702042285e-05	3.13306932664506e-05	2.94377760046672e-05	3.33881742236237e-05	3.32249116775676e-05	3.60439602707413e-05	3.71454753373561e-05	3.12135761414214e-05
pos_630	1.36167569255999e-05	2.18413235776611e-05	1.78313996450799e-05	1.83079616798445e-05	1.64392606953554e-05	1.80675592135646e-05	1.53280102123313e-05	1.72672959245169e-05	1.87441397759315e-05	1.75637466091872e-05	1.88311402162448e-05	1.39079636003651e-05
pos_897	5.57242968625202e-06	1.20177005035507e-05	7.55076217498207e-06	8.06658244512619e-06	8.62872952670836e-06	8.24471137504102e-06	7.31169110008103e-06	8.1287488844586e-06	9.28866554147432e-06	8.765071136851e-06	8.84284824812158e-06	5.0562497010696e-06
pos_215	0.000257859117246233	0.000424240288123345	0.000277611174519742	0.00035883326170701	0.000334733009040738	0.00033826631717196	0.000317000785266293	0.000331133097772307	0.000388295317185365	0.000358380556339558	0.000344425963308747	0.000286192596480138
pos_587	0.000140072305179633	0.000211385195147633	0.000153513104421447	0.000178106067229475	0.000174683191980329	0.000174097158536012	0.000169910133926872	0.000173762234561147	0.00019755846886711	0.000190357547499827	0.000176115013091755	0.000158787959078916
pos_645	0.000217989799011873	0.000374336254054199	0.000220574027311749	0.000270568483383906	0.000273072947431275	0.000280213794499496	0.000238925433219437	0.000267324366212486	0.000313322571182529	0.000291995619433566	0.000254654871194837	0.000198495517132201
pos_1361	0.000108834444216852	0.000174335743349524	0.00010835119050981	0.000138760016018241	0.000134071075486489	0.000141462757847652	0.000127384809983552	0.000138062938716541	0.00014805059891577	0.000151478344842971	0.00013775391221936	0.000111685438905082
pos_599	6.18658742715251e-05	8.74098416504708e-05	6.37164926637838e-05	7.51789069719852e-05	7.30432172075612e-05	7.27688543156814e-05	7.07553736289892e-05	7.29753845689733e-05	8.00616748462071e-05	7.89872108435446e-05	7.34375582319608e-05	6.27792521782937e-05
pos_87	0.00111468709851658	0.00170835684453371	0.00133626274963028	0.00133524204447775	0.001170791466644	0.0012664149324104	0.00139106787418216	0.00148608876216282	0.00181032318622998	0.00151000914522348	0.00151975428911609	0.00147582995805103
pos_2379	3.86090007700794e-05	6.06849623394355e-05	4.87082989473051e-05	4.78683307415893e-05	3.52256443618118e-05	4.76563194814349e-05	4.55641017850022e-05	5.45242453017078e-05	6.29019050592845e-05	5.58438406293181e-05	5.2081928453725e-05	5.12302364228269e-05
pos_1400	0.0136869845971094	0.0205875463456008	0.0151575713392229	0.0152919984637677	0.0117520446741079	0.0157125505671298	0.0161335432430645	0.0173533986361573	0.0197947455156409	0.0181678577313539	0.0184105544930216	0.0162338653995277
pos_1756	4.70374672663128e-05	6.9594716375232e-05	5.06933921334488e-05	5.2904288192798e-05	4.14457362299246e-05	5.24601934783265e-05	5.38558900205773e-05	6.07183519281036e-05	6.72387386424992e-05	5.90132631709965e-05	6.00982870780788e-05	5.4546993435761e-05
pos_2775	0.000293134449742319	0.00047655169561088	0.000344932450248036	0.000420023934720099	0.000364901754794339	0.000403766405702478	0.000390803765290745	0.000401001521295014	0.000468170896520863	0.000398705692185861	0.000465213792938142	0.000404494140673703
pos_1798	6.44030748863139e-06	9.0182961545723e-06	6.8851790412444e-06	6.88073914220843e-06	6.47934049515573e-06	7.3981329413254e-06	7.40769495709745e-06	8.1590851641134e-06	9.53337405349974e-06	8.41225100887304e-06	1.01352202366171e-05	7.8472066077226e-06
pos_110	4.86935893708583e-05	6.95369741017906e-05	4.92239768212523e-05	5.28060527328542e-05	4.7276642951447e-05	5.36520858142986e-05	6.05170668987901e-05	5.96050365416467e-05	6.53812813151344e-05	5.97552828726393e-05	6.54676775662883e-05	5.65044764439405e-05
pos_407	1.26213391106643e-05	1.68182844056758e-05	1.34441272796568e-05	1.47572401251692e-05	1.2067893983028e-05	1.39636069467514e-05	1.54066966384165e-05	1.62718049862437e-05	1.79165923436912e-05	1.67012696652627e-05	1.69739627582497e-05	1.46248075805528e-05
pos_2096	9.21395672942932e-07	2.998157744994e-06	2.04977664066002e-06	1.82567862619846e-06	1.47739318552262e-06	1.57860687870669e-06	1.58816125540222e-06	1.6969085873197e-06	4.17694637874683e-06	1.63178592694684e-06	1.82092105065276e-06	1.02462683596868e-06
pos_2190	1.6468462868374e-06	3.14036128589092e-06	1.69791556784416e-06	2.18611203090226e-06	2.29251702699859e-06	1.72566667842953e-06	2.38136541496106e-06	1.97667777710146e-06	4.45456888266427e-06	2.92716733051188e-06	2.26357177255874e-06	1.71305279324483e-06
pos_1461	5.3326205846522e-06	6.55618294135143e-06	4.27802300596761e-06	5.42877377159833e-06	5.12351201604764e-06	4.58627987233314e-06	3.90733545309731e-06	6.10279084062323e-06	6.96900780441084e-06	5.55656203694149e-06	5.95783836523769e-06	4.48066913720659e-06
pos_448	0.00384178521513875	0.00456953708683339	0.00351668795362955	0.00411609376358452	0.00410808820364637	0.00403186991085755	0.00413953832849168	0.00455937563162381	0.00548242110227299	0.00433129738165433	0.00470111182923556	0.00408923333057423
pos_1094	8.95558216869551e-05	0.000109137806607339	8.23801980893444e-05	9.7455858850682e-05	8.81782702601784e-05	8.47044669545542e-05	7.93709580857676e-05	0.000104634600741942	0.000140849449494431	9.32476229105806e-05	0.000111233920960069	8.40825755182909e-05
pos_1924	5.13875207692201e-05	5.85552593990586e-05	4.91699857006227e-05	5.9608384860465e-05	5.52870448067867e-05	5.17713488715683e-05	5.27970889907015e-05	6.26485309374183e-05	7.29550844498793e-05	5.44229518495115e-05	5.87293982983448e-05	5.23028827488291e-05
pos_2128	4.89339735949588e-06	1.34590592417407e-05	5.84914092557654e-06	4.55963843665433e-06	7.17569066077436e-06	6.91941049159445e-06	1.07480114303727e-05	5.5228253412457e-06	1.26736726459491e-05	1.08710538218649e-05	6.87376538679153e-06	1.09240620960083e-05
pos_833	9.77307287911229e-07	2.01099790692981e-06	4.3394257616769e-07	6.21230073728798e-07	1.28329758459991e-06	8.84338134761504e-07	1.66307956526403e-06	1.11446643886681e-06	1.9216876051551e-06	2.28428158453305e-06	1.6341362291915e-06	1.60516067066913e-06
pos_2514	0.000244770999422418	0.00247932541710712	0.00221942555011873	0.0017710082578687	0.00169753867198032	0.00194476328920662	0.00182595175469721	0.00119299614774424	0.00377111402736185	0.00304495384302324	0.00258973328009714	0.00225582924272357
pos_193	8.03485514577717e-06	1.33983148908262e-05	1.0815575729779e-05	1.04725804766796e-05	1.12038074992114e-05	1.08122022204921e-05	1.2773401643972e-05	9.66421070090681e-06	1.31324870418638e-05	1.17949907510007e-05	1.34943478521546e-05	1.09628587007271e-05
pos_393	1.00331225405065e-05	1.83552580533947e-05	1.31422127090737e-05	1.38351740777893e-05	1.38328393432007e-05	1.43881570561717e-05	1.6122936156702e-05	1.26142145121742e-05	2.00719759088507e-05	1.37214192509594e-05	1.70271415056468e-05	1.62802040169553e-05
pos_1290	1.13243495007456e-05	1.3219259260806e-05	1.15670747941141e-05	1.07766621258677e-05	1.05285917803596e-05	1.12403039859795e-05	1.08636545029521e-05	1.08463306424422e-05	1.28848506259087e-05	1.27007573760859e-05	1.09790979527635e-05	1.18302098192058e-05
pos_1847	2.48770295543089e-06	4.65141340178657e-06	3.59607618662845e-06	2.68643438116944e-06	2.35807700407698e-06	2.360190042434e-06	2.12543587387192e-06	2.17915068375752e-06	5.32087233800263e-06	4.38028076702811e-06	3.50555198984895e-06	3.73533849508442e-06
pos_999	1.7051481967083e-05	2.26402986209478e-05	2.11080336150975e-05	1.79216353403867e-05	1.52232924392004e-05	1.70180260093283e-05	1.59006614074095e-05	1.70914038408556e-05	2.28325523596713e-05	2.021434126724e-05	1.77948906860027e-05	2.17563758538368e-05
pos_1934	0.000221950349615676	0.000306435749234891	0.000180334369153527	0.000198213559792141	0.00017645741929698	0.000209980530803575	0.000253943246111637	0.000209708738198085	0.000329000545403334	0.000215937837632288	0.000298669164519401	0.000237401091790106
pos_1980	3.54846446758948e-05	3.68479666342847e-05	2.95416872968544e-05	2.93267454880865e-05	2.86635296718168e-05	3.12242674707439e-05	3.42020513823562e-05	3.27895819802912e-05	3.84886188988517e-05	3.32186447199945e-05	3.92381557037019e-05	3.63616225457437e-05
pos_2066	0.00012882635240798	0.000176840017930738	0.000139377907118753	0.000121333004892504	0.000121778131155248	0.000127823178434266	0.000150627288778806	0.000151913835693398	0.00016003549884384	0.000144057215842846	0.000155522921664014	0.000148540967587957
pos_1059	1.62461122593232e-05	1.99073918968174e-05	1.45490464524617e-05	1.4463700509179e-05	1.48491285281678e-05	1.32522915911089e-05	1.52688977357164e-05	1.67018873117699e-05	1.71402719856131e-05	1.76978895363328e-05	1.89028051723122e-05	1.74435485424086e-05
pos_1167	0.000107331036752208	0.000131781555058187	0.000100130169239552	0.000100809889606698	0.000103147160278868	9.47796740869775e-05	0.000114601138512599	0.000113299447059447	0.000119799557457828	0.000113038977622427	0.000117861596532799	0.000122889704269997
pos_1	0.000143373613404701	0.000280516099889959	0.00016750424081482	0.000127429588182838	0.000139869306485217	0.000200086248543327	0.000141074891906182	0.000157863228276111	0.000254417617725337	0.000130812981686961	0.000224718909490409	0.000124289239886146
pos_235	0.000136574954397291	0.000318836426541789	0.000158361796217731	0.000130602613002927	0.000180964025023914	0.000161233435021077	0.000166434079503008	0.000138127483861583	0.000221871087901602	0.000169746432061933	0.000205335897011534	0.000149994190100458
pos_1103	2.33144710307891e-05	0.000100573096788742	3.36432406352874e-05	2.02638922500499e-05	4.30936665999658e-05	4.22300861467842e-05	4.64521608095571e-05	2.58301467075833e-05	8.21962207895589e-05	4.02417848417049e-05	7.00542892026619e-05	3.42668655474869e-05
pos_449	0.000240571826514778	0.00206951661035143	0.00051154426315852	0.000159486498874544	0.000718368365965772	0.000710735470501764	0.000756880261262242	0.000260195433505102	0.00162284494018566	0.000683426727301277	0.00148099493311014	0.000487334080819942
pos_2817	6.89909950492116e-05	8.8187256521915e-05	7.15886150070403e-05	6.440542183071e-05	7.21015024099684e-05	7.09343052625096e-05	6.25526762937908e-05	6.65169542785969e-05	8.03437397313911e-05	7.92955004898139e-05	9.3767075823223e-05	6.41284362832968e-05
pos_1181	6.38540997188843e-06	8.69797085797087e-06	4.75608511426741e-06	6.21727125392358e-06	6.07690300366647e-06	6.14793079171506e-06	5.83215717024448e-06	6.67991868069516e-06	8.52294538719693e-06	7.93923238371409e-06	8.65570836067598e-06	6.79606276683937e-06
pos_2800	4.14197118142509e-06	1.6671805159175e-05	3.76803365541333e-06	7.53996194489536e-06	1.10076734115423e-05	9.53978864037908e-06	7.76583228313465e-06	7.01034282862024e-06	2.39243166954391e-05	1.72447062969445e-05	2.18521682612101e-05	1.00183040160281e-05
pos_1432	5.59293455279314e-05	7.65688896979071e-05	7.42032617588857e-05	5.44749631189395e-05	6.05704270500826e-05	7.12186968812788e-05	5.95658368497939e-05	7.04236711333495e-05	7.0393814916351e-05	6.17093190887472e-05	8.25044088866702e-05	6.50439455868172e-05
pos_540	1.59624647480711e-05	2.34108457087338e-05	1.70365667859647e-05	1.23036312373006e-05	1.77409686779092e-05	2.2131692468147e-05	1.71961388482058e-05	1.8748097929058e-05	2.58009082366361e-05	1.41451688800969e-05	4.02061727884679e-05	1.75663332370857e-05
pos_627	2.71742340134253e-05	3.54707404183851e-05	3.38163419382232e-05	2.59482688119822e-05	2.66678528003933e-05	3.69139721134316e-05	3.589068971504e-05	3.29892032584901e-05	3.15530282922871e-05	3.38129988233489e-05	4.66084054736011e-05	3.28866737042952e-05
pos_1270	6.87083562982464e-06	6.88064879033784e-06	6.1357186610487e-06	1.58358658921546e-06	2.39117913289514e-06	1.77380669725318e-06	0	7.85798908996056e-07	2.08103996091174e-06	2.27158870131552e-06	1.18578102874268e-05	4.35514326331569e-06
pos_2262	2.30747570376795e-06	3.2205861878453e-06	2.90769919403156e-06	1.98719644959534e-06	2.08115064064393e-06	1.25910577702775e-06	2.19847691028294e-06	2.6542866055901e-06	3.06591646777927e-06	2.60789079916441e-06	3.88101659571968e-06	2.59009035697715e-06
pos_2769	5.58109619344737e-06	0	1.20675804813102e-06	0	0	4.14015763622937e-06	2.25571146015454e-06	1.76050382886483e-06	7.11745347429729e-06	5.07999683008954e-06	6.08059699628525e-06	1.46043850038308e-08
pos_1792	1.81567274537633e-06	2.46844927263787e-06	2.28739998560167e-06	1.45968110268748e-06	1.25346876885529e-06	2.1492514289354e-06	2.17377511684007e-06	2.27234711719208e-06	2.81234109167332e-06	3.20214857970551e-06	3.69342081991291e-06	2.05243808246008e-06
pos_2022	0.00180442444007625	0.00202951134712369	0.00184897112778053	0.0017919382779541	0.00179338758468162	0.00201534437896279	0.00232289301253754	0.00216477105456873	0.00254259358724995	0.00250408681843243	0.00294549268407945	0.00201741939016416
pos_2207	2.00667054538262e-05	1.39424524358297e-05	6.55572520446865e-06	1.16231586022384e-05	1.36694826961862e-05	1.31618064101987e-05	1.58529403072893e-05	8.69901773447783e-06	1.86508333437368e-05	1.56984038547237e-05	2.60283319874502e-05	1.06910504262447e-05
pos_1625	4.23279831873222e-05	4.90376901774035e-05	2.86621710715897e-05	4.1125938820292e-05	3.51921345354418e-05	4.09791572549043e-05	4.88508148337297e-05	4.5178908424475e-05	5.43774228263243e-05	5.18487900872888e-05	5.89756677415335e-05	3.98436562606408e-05
pos_2167	3.15054270876698e-05	3.32816531004582e-05	2.52313906611318e-05	3.05009159101811e-05	3.27827479258771e-05	3.08198793481569e-05	3.15640678960429e-05	3.05610723504779e-05	3.65218030425895e-05	3.53574885890771e-05	4.12818327350299e-05	3.05689290125435e-05
pos_1247	1.88218697838874e-05	1.89444217785478e-05	9.99833150662132e-06	4.58808658390273e-06	2.15698022564588e-05	1.59698526925857e-05	2.24014864392668e-05	6.08334434442515e-06	3.52157024132453e-05	2.390673330215e-05	2.28515494341957e-05	7.99450142967156e-06
pos_1931	1.48821082908495e-05	1.29746975472143e-05	2.52865083682045e-06	3.13056578795409e-06	1.84383797048345e-05	6.67815458858633e-06	1.27174527514353e-05	4.44765589026226e-06	3.14832122391749e-05	4.49696036733975e-06	3.39741508096164e-05	3.3214979698296e-06
pos_868	4.54641273308152e-06	8.11679217077887e-06	3.29721873212477e-06	4.62208244941999e-06	9.18566942086098e-06	5.61485489835012e-06	9.89654959969116e-06	2.93655335439077e-06	1.07203578708224e-05	5.32405440639646e-06	1.41926547787844e-05	5.59761576584408e-06
pos_2759	9.35928582758496e-06	1.69541254068543e-05	6.76947183697749e-06	6.10745797251663e-06	1.94740019141223e-05	1.25714315957161e-05	1.92684522195973e-05	7.85740141381344e-06	2.33738044931618e-05	1.34290941984434e-05	2.58719591928231e-05	1.24543280891785e-05
pos_494	1.77255139246607e-06	4.48346441356838e-06	1.06773681786501e-06	3.89324993134596e-07	6.78771325473267e-06	3.45354573158006e-06	5.50450320485847e-06	8.33964716131121e-07	7.71257988258013e-06	3.82643419823304e-06	8.32264453365061e-06	2.85358942439627e-06
pos_937	5.63924683449776e-06	1.34890699939728e-05	3.51494997895559e-06	2.24231848147187e-06	1.86310104279385e-05	9.23794798611549e-06	1.69282852827515e-05	2.82869507383903e-06	2.22347544423547e-05	1.11972860094461e-05	2.40297437490546e-05	8.72110624537796e-06
pos_652	1.47672909389116e-05	1.09664768321758e-05	4.89630589027053e-06	1.06439482541199e-05	8.45141160362783e-06	6.46539758454678e-06	8.97907274229215e-06	8.54279196765953e-06	1.12895700682823e-05	7.21744946562271e-06	1.22583044591407e-05	9.0835554570823e-06
pos_379	0.00279829863371838	0.00266094181330622	0.00175894135132069	0.00262279207551854	0.00231893360600444	0.00239563433894509	0.00256098197723019	0.00259113090231394	0.00241705748184377	0.00204397119796101	0.00268875108046697	0.00278843118424591
pos_945	2.04017418753684e-05	2.00066229910876e-05	1.46793864853736e-05	1.86660197548166e-05	1.58825076946561e-05	1.84854668395144e-05	1.73541492791287e-05	1.89284626442661e-05	1.94715182230668e-05	1.66625962311626e-05	2.13386385784511e-05	1.99458478072205e-05
pos_1022	7.88952842929272e-06	8.49016026475634e-06	4.12888314561963e-06	7.36721135427609e-06	5.6163545938856e-06	6.01474248247494e-06	7.05735831314195e-06	8.4263373459177e-06	9.13162637975416e-06	5.58338101111197e-06	6.5950092328667e-06	4.58247731302156e-06
pos_2261	4.709857128318e-05	4.88779450612855e-05	2.94283067719847e-05	5.86089467603922e-05	3.68552616579396e-05	4.33035460332313e-05	4.33330451866291e-05	4.48864360952276e-05	5.6661278543225e-05	4.22645037532693e-05	4.70534104619886e-05	4.27688710101635e-05
pos_1860	5.36194776305766e-06	9.59947985395949e-06	3.76773739213682e-06	4.70848474358245e-06	5.56944669359989e-06	6.67982246669361e-06	5.19487600988901e-06	5.74903842035625e-06	6.30663737391549e-06	6.14839577525948e-06	8.21079980613258e-06	4.40890537639447e-06
pos_2049	2.11885140027162e-05	2.6316182217529e-05	1.95090096056671e-05	2.05256314416993e-05	1.98899478616326e-05	2.13411198498165e-05	2.06595358425979e-05	2.16247231698364e-05	2.13692980130486e-05	2.2599837319483e-05	2.40657983440365e-05	1.80628286336075e-05
pos_428	1.78319611385133e-05	2.62544651742787e-05	1.36474077528434e-05	1.54748353033883e-05	1.42108975772953e-05	1.96393815442623e-05	1.62132949050698e-05	1.71588800926742e-05	1.74483627503338e-05	1.89868884979672e-05	2.21059015428429e-05	1.33411039032122e-05
pos_28	5.98559743531411e-05	0.000132171448657631	5.70775276421746e-05	7.43997504737982e-05	6.30099329568608e-05	5.79468902279909e-05	7.19349365385466e-05	6.87472048290182e-05	7.84389201739906e-05	6.20829557212219e-05	7.60775565330198e-05	4.08656048377188e-05
pos_2789	8.0480258779396e-06	1.16732633323067e-05	7.79800707424424e-06	8.72355622461614e-06	8.35739915228656e-06	8.02408177508058e-06	9.31245662076757e-06	8.90837291204389e-06	9.46266620891499e-06	1.01472741869316e-05	9.2928454646283e-06	8.26154265658567e-06
pos_1487	8.78567505463626e-06	1.28739349931572e-05	8.19975153054298e-06	9.14031993224753e-06	8.46780995991721e-06	9.78438666035388e-06	9.83025050377112e-06	9.40137899578068e-06	9.98862382779125e-06	1.02430647923677e-05	9.96350243293132e-06	9.08912084597514e-06
pos_351	0.000347078297794174	0.000443860055559999	0.000312449502502598	0.000337944924960571	0.000319439398367201	0.000349516298544794	0.000337913891728457	0.000344467956402594	0.00036206192827444	0.000365294341137333	0.000358386002709592	0.000324871572871567
pos_2593	2.50548650661536e-05	2.76165033882918e-05	2.09931616612332e-05	2.63671922219607e-05	2.18381731628036e-05	2.5090682649701e-05	2.46415028265626e-05	2.53590403823299e-05	2.43012375418344e-05	2.46694664201742e-05	2.48308283270829e-05	2.41719326089779e-05
pos_754	0.000151635792753487	0.000199759569531904	0.000112174727347252	0.000151344439117337	0.000102732887064961	0.000138345915451429	0.0001185649783482	0.000135235742143327	0.000137634902208214	0.000162410133632968	0.000149368539300922	0.000138063134944057
pos_2465	0.00011965603312769	0.000140355272809682	0.000106535958651109	0.000125754275392634	0.000115624298250676	0.00011475825813913	0.000122823953966033	0.000119873955989885	0.000127086626960497	0.000121090357354994	0.000127692064280408	0.000120524367447054
pos_2594	0.000341702404204824	0.000376607880526836	0.000302181126270102	0.000355801565511832	0.000306444523126778	0.000309231027374163	0.000334505670731907	0.000328541048030009	0.000344701595853548	0.000319485006054664	0.000357542411005626	0.000323726722623897
pos_189	6.02527411205878e-05	0.000191717232958813	1.34149303000417e-05	0.000136440383239046	3.45505899078211e-05	8.47721333403703e-05	3.61713476141253e-05	5.06090222973678e-05	3.58150164075961e-05	2.37802965140885e-05	0.000138603443740746	3.67845727214878e-05
pos_2278	0.00108971721388233	0.00148354040617544	0.000910622592568717	0.00114603276055555	0.000867398317997638	0.0011731087393779	0.00110458795557653	0.00115358992714499	0.00104737745289627	0.00101055225928873	0.00131468242721586	0.0010755187022257
pos_2843	5.54651866044626e-06	1.8027228507601e-05	4.62047854055239e-06	6.45670319756975e-06	3.59249311312444e-06	8.42353227821079e-06	2.99355438010119e-06	2.06608504061412e-06	2.24963605127782e-06	4.92278047625333e-06	1.59625278082279e-05	6.19199488865342e-07
pos_689	3.11175719016698e-06	2.0250171680705e-05	3.46672133520361e-06	1.56414310773519e-06	3.10786161958304e-06	1.15190025053744e-05	2.83596317647661e-07	4.48977913852182e-07	2.29848423446978e-06	2.69670087165606e-06	3.31027825295364e-05	1.17457791290062e-07
pos_1993	0.00171089183137644	0.00190735868538432	0.0010194696577724	0.00103368150746819	0.00114246102062286	0.00104586078922201	0.00118475303260891	0.00109812674191054	0.00146364134061935	0.00155718870508103	0.00223181772692591	0.00108759832508539
pos_2660	0.000967462485582657	0.00110541648391961	0.000708515080854387	0.000629645824067759	0.000635516823561436	0.000600578363215533	0.000659991114355796	0.000646529558374018	0.000858095258630156	0.000788641314976542	0.00107242445931698	0.000630607256323466
pos_866	0.000102814196232674	0.000130956325831409	7.13415733671289e-05	5.58449205575878e-05	6.22681335639282e-05	6.74589033685474e-05	6.99830976775714e-05	6.31495034349558e-05	9.55386692036802e-05	8.91995288084702e-05	0.000118175052445121	5.9759937705342e-05
pos_1958	4.68692683815884e-05	4.89340990191025e-05	3.89990633381878e-05	4.01876870897351e-05	3.8669204603036e-05	3.99208459308388e-05	3.60973057358352e-05	3.9535056514044e-05	3.99327338688535e-05	4.18931632688941e-05	4.74478834890435e-05	4.04358220637326e-05
pos_1182	2.77438995365808e-05	3.25796969452639e-05	1.69917414841016e-05	1.70308439652936e-05	1.70329367851055e-05	1.43306927991166e-05	1.4954831019804e-05	1.40731768496414e-05	2.24844143861157e-05	2.24233712535002e-05	2.74541075018535e-05	1.63494054119529e-05
pos_1272	0.000751036707108483	0.00100823049760102	0.000567946060953283	0.000578532060155003	0.000534891532301538	0.000519904154029455	0.000552748751587922	0.000567001771730197	0.000690693543085367	0.000709057961681978	0.000784135350974936	0.000566415241551046
pos_1403	0.00607455983589868	0.00676178218458976	0.00322008672234822	0.00363511354087203	0.00226511916412327	0.00509691608259597	0.00444004671895304	0.00429576025309229	0.00352954376692546	0.00411842229003799	0.00680735785038745	0.00616907062951013
pos_1821	3.39416661547027e-05	5.62682486984017e-05	1.6463528590477e-05	1.10903338585928e-05	7.25947193899308e-06	2.94157510420876e-05	1.44540750761969e-05	1.31978608859946e-05	1.06169848002743e-05	1.50468338750919e-05	4.23137676962804e-05	2.38204541273966e-05
pos_709	3.84636441905541e-06	5.14501265682642e-06	1.67214121222436e-06	1.65852235472761e-06	1.91310574577552e-06	2.39614371849852e-06	2.39091187784249e-06	2.70568730290587e-06	1.40566928600498e-06	1.94878165321629e-06	4.09599203155669e-06	2.89401910387595e-06
pos_476	2.99466406887494e-05	3.27012188699916e-05	2.76187259577362e-05	2.98555441491986e-05	2.85734186082052e-05	2.78603765886216e-05	2.92586054376656e-05	2.92033866213406e-05	2.77726179855708e-05	2.52040995781022e-05	3.07434346478781e-05	2.91743412064077e-05
pos_104	0.000275545001922607	0.000297481899373465	0.000241125578671086	0.000281984393654512	0.000252826717742442	0.000264612452363184	0.000272586432439615	0.00026428928610927	0.000274233222757969	0.000251636125132692	0.000289622048872899	0.000275326482903984
pos_1308	6.17645902587467e-05	6.52661947738841e-05	5.32827301523296e-05	6.31710249172925e-05	5.24982833267222e-05	5.72108178971103e-05	5.83158011068176e-05	5.63176573170488e-05	5.59757404560689e-05	5.39996342417839e-05	6.04704345811661e-05	5.83845686364583e-05
pos_1675	2.37744363783643e-06	3.25179782042851e-06	2.22738708530807e-06	1.49324905903285e-06	2.12369467613576e-06	2.22936024867083e-06	1.58892366632577e-06	2.2280171737769e-06	2.67678013017315e-06	3.09479034665259e-06	2.47359880321855e-06	1.65074179546724e-06
pos_2222	0.000368134728883743	0.000476284970688403	0.000349112354556853	0.000352466890647138	0.000372139688290075	0.000386965811162174	0.000368654239296548	0.000369771804546218	0.000377865385305169	0.0004421557065839	0.000388772327399315	0.000345706828494936
pos_706	4.64655136254949e-05	8.72735694541759e-05	4.78128306769526e-05	4.49921129364358e-05	4.02623139269417e-05	5.28711669884595e-05	4.40924549887162e-05	4.49338218932283e-05	5.10950642012151e-05	7.40336456728572e-05	4.67788756072958e-05	3.6621541048378e-05
pos_1881	0.0146605944639966	0.0196004426935957	0.0130739883438543	0.0151526120308055	0.0141215871450358	0.0170806006182452	0.0163151220223048	0.0166762294377603	0.0170699912854881	0.0189226233069434	0.0147763987766176	0.012708989570621
pos_2747	6.80795857221563e-06	1.00916667571916e-05	5.23412510344005e-06	5.17728048755516e-06	5.71620746976197e-06	5.42488720210095e-06	6.94649164002757e-06	8.18922910265912e-06	6.86114059619218e-06	8.94874104491402e-06	6.35423360610188e-06	4.71415315295765e-06
pos_2308	1.1283111973446e-05	1.31157428635466e-05	9.95974742145154e-06	1.10114531449386e-05	1.10279464645974e-05	1.14001572539083e-05	1.18552260178498e-05	1.15561563773427e-05	1.22744926732681e-05	1.39905848246111e-05	1.31147066173983e-05	9.70710894391877e-06
pos_1114	0.000139887308165014	0.000156327255379418	0.000122653602883356	0.000137062501575508	0.000140566608155614	0.000142436192189861	0.0001408078107194	0.000141061456907141	0.000141061048581078	0.000165643621269518	0.000148411258153763	0.000128006357010359
pos_281	3.04374127287942e-05	3.43039844844823e-05	2.75592843564145e-05	3.04316759836738e-05	3.00730611519866e-05	3.03069476956085e-05	3.10289632603351e-05	3.14736825135128e-05	3.15724407619479e-05	3.87221659309056e-05	3.17824720961234e-05	2.72450888908428e-05
pos_1883	7.10283099679514e-06	7.85031714985735e-06	6.10549485097133e-06	6.40004069848746e-06	6.62403303344139e-06	6.72893045230431e-06	6.63318818753565e-06	6.31140065179e-06	6.92374781121181e-06	7.92065944733279e-06	7.32404934443545e-06	6.15569353722852e-06
pos_1032	0.00524062172752608	0.00594276153487909	0.00443961360598091	0.00471871350224968	0.00447256771631958	0.00503802144734157	0.00500483915482376	0.00507980218488596	0.00553578266534895	0.00581930663581306	0.00550554738381607	0.00470490906251234
pos_2464	0.000982819054100846	0.00105979945765721	0.000851432300892654	0.000882466434842218	0.000890083367833227	0.000945717597517421	0.000964448241930506	0.000964319843731948	0.000955997561850481	0.00108211290470771	0.000987437815589617	0.000942849534956141
pos_297	0.000434148532262969	0.000448204250643325	0.000332691520078428	0.000382362582189415	0.000340414984849113	0.000391788026876023	0.000401926020496301	0.000388704454660659	0.000404175720934803	0.000497408943229768	0.000437149332006349	0.000380583220612698
pos_1197	0.0106368884850162	0.0105518052526958	0.00857811032230362	0.00906968688086284	0.0095803801950581	0.0101455526405621	0.0101783383448625	0.00990403147157265	0.00932097206661127	0.0103758643356988	0.0106950825080261	0.00970424927119713
pos_227	0.000167121344336185	0.000186013190373238	0.0001405536844283	0.000150291981122399	0.000154210942305518	0.000162218386921242	0.000166435652382897	0.000165035041342118	0.000154236945736063	0.000174840212159914	0.000173994806546197	0.000156416094221404
pos_2364	0.000958277683086518	0.000999872944612255	0.000773943903363754	0.000850356820880262	0.000872027986558194	0.000904990136460836	0.000931366685722556	0.000912123724695597	0.000885938082536561	0.000968639225447638	0.000946474281863445	0.000913072751119389
pos_1007	0.000196979699388231	0.000200310234098613	0.000158517170678757	0.000175811633231088	0.000176210202172162	0.000190478596602469	0.000180250520336071	0.000183338783203375	0.000165943433760962	0.000189487228029412	0.000183365212790727	0.00017458366169039
pos_2603	0.000298273107067563	0.000295330138668931	0.000236362780452809	0.000262202299205358	0.00027212738948041	0.000279052256695013	0.000275914485954569	0.000282462598978459	0.000266287970276373	0.000293468027780569	0.000275950547014698	0.000280902487729047
pos_1442	0.00047971170460823	0.00045598432015738	0.000325035648823167	0.000382181220930233	0.000372235343578963	0.000443763479555213	0.000424816666680195	0.00042088198656314	0.000463929202416089	0.000508561403829601	0.000505165499736643	0.000381436362981082
pos_1115	0.0116257898999275	0.0131488642717179	0.00927481642302788	0.00938919024202001	0.00910210362427596	0.0103771866617167	0.0101800268680763	0.0102229163609914	0.0111446662415583	0.0116963889010826	0.0120538823347262	0.00946744352577267
pos_1125	0.00381095036607501	0.00403521611338266	0.00282111122145249	0.00287484637814352	0.0026824840005579	0.00312373436888315	0.00314700302186808	0.00309494237336883	0.00352513244755268	0.00349878381084893	0.00371600337784222	0.00294072329005139
pos_278	0.000113877880404028	0.000118208588711647	8.75686950493904e-05	9.51579086551963e-05	9.01065577315253e-05	0.000107052725548561	0.00010513708286559	0.000102122447226859	0.000103081433133425	0.000117486722914208	0.000118923916430271	9.39350220594112e-05
pos_1477	0.000129005200832969	0.000136502854032981	0.000104093384664551	0.000115871571164218	0.00010933142111952	0.000117494670676946	0.000121708833105914	0.000119016804781645	0.000119017208555818	0.000131408879998542	0.000130971552188565	0.000116414011651266
pos_93	2.11523434174405e-05	2.16060611217389e-05	1.54923332611093e-05	1.76096488208031e-05	1.6229989490048e-05	1.84150834299879e-05	1.93005579597304e-05	1.77736297059814e-05	1.84311636031511e-05	2.0915262295436e-05	2.16518417774212e-05	1.79417396736628e-05
pos_795	0.00257281336358537	0.00334287591930492	0.00248154714595578	0.0030974259938808	0.00267721809771985	0.00323969251172421	0.00294652780252474	0.00292722627350316	0.00284686026326806	0.00355113884764176	0.00345384119801687	0.00279094207108832
pos_981	3.27146964389559e-06	4.74409556419454e-06	2.73504257444639e-06	4.39654680089135e-06	3.64199928166939e-06	4.18150463461712e-06	3.56236944261863e-06	3.78413423529054e-06	3.76663973698608e-06	4.57457999999587e-06	4.47291235538066e-06	3.58235784214712e-06
pos_554	0.000108791190633001	0.000150188771088944	8.75874749807656e-05	0.000133447070013296	9.37291583178701e-05	0.000115815425708174	0.000121250967873842	0.000131800301719539	0.000117268853100193	0.000145532289267686	0.000144383346122002	0.000128881421100936
pos_5	1.7141949875766e-05	2.32628659038781e-05	1.52107053614633e-05	2.10442485791111e-05	1.70803339165001e-05	1.99408127632178e-05	2.00523856788373e-05	1.97036685645681e-05	1.88136284972956e-05	2.15427918565246e-05	2.35551606369242e-05	1.89848086342893e-05
pos_2184	3.64412276626205e-05	4.7024877922682e-05	3.26242315519055e-05	4.3345054092334e-05	3.58170532267681e-05	4.21916043524366e-05	3.96191270602544e-05	4.00700276377977e-05	3.94632195848878e-05	4.69501474326007e-05	4.88544804019455e-05	3.78465349325922e-05
pos_205	4.07838549573931e-05	5.70995766343621e-05	3.67423233085705e-05	4.9807740027999e-05	4.35541617594663e-05	4.93020260342162e-05	4.71383690722155e-05	4.71872041474355e-05	4.62428754430512e-05	5.49489441965588e-05	5.66509463763112e-05	4.43948190904659e-05
pos_444	7.43881494527549e-05	9.83573563433694e-05	6.74495604290969e-05	8.55332200565853e-05	7.38755053320666e-05	8.52451454366294e-05	8.16262981661961e-05	8.15653750425107e-05	8.33136629754188e-05	9.31147833296961e-05	9.62695174677134e-05	7.76684701699371e-05
pos_1463	5.85958398674742e-05	8.10545539611924e-05	5.1769911548028e-05	7.18723924305748e-05	5.84480292511759e-05	7.05155332193995e-05	6.61591936682468e-05	6.57101708610646e-05	6.62756480912903e-05	7.22984296677582e-05	7.44335507349324e-05	6.69181100265044e-05
pos_1929	0.000172507209194963	0.000214119237067817	0.000154817763892128	0.000195125136054076	0.000162588470786407	0.000182950210425409	0.000184463473241919	0.000187999758533603	0.000181759540923747	0.000195964665191149	0.000202156538397303	0.000180017181619562
pos_452	1.59050202470765e-05	2.13292615368986e-05	1.55306281036762e-05	1.86635065178525e-05	1.56276356411011e-05	1.91183636001351e-05	1.77587025936687e-05	1.82567695935148e-05	1.78368693607449e-05	1.77439223781695e-05	2.15659073607217e-05	1.73578349864486e-05
pos_1553	1.52042240466445e-05	2.1385675154906e-05	1.38880521974006e-05	1.61349408424922e-05	1.4145306226956e-05	1.71291579595866e-05	1.65058002234726e-05	1.68630124610177e-05	1.5655738892449e-05	1.79384487764261e-05	2.00121392070273e-05	1.51160673238928e-05
pos_1774	3.69357506256958e-06	6.33661351734882e-06	3.55907202572199e-06	4.35258038064259e-06	3.69161138043991e-06	4.97719640621853e-06	3.83134956079861e-06	4.79979677862768e-06	4.1171188469027e-06	4.84300915955722e-06	5.88386263258845e-06	3.99688419343959e-06
pos_2630	9.0735262030785e-06	1.17828953639591e-05	7.54317534772037e-06	9.25131825026919e-06	8.95237181368622e-06	1.07582399208674e-05	9.56139020191554e-06	8.82778111895881e-06	9.14186274452291e-06	1.04332037082986e-05	1.16169174084233e-05	1.00956520996356e-05
pos_1329	5.75292886424592e-06	7.85184886707646e-06	3.75248309755147e-06	5.5523799028788e-06	4.02432046093245e-06	5.96901064683354e-06	6.02879655339154e-06	4.92378624667949e-06	5.21323356165369e-06	6.8106195620399e-06	8.13294922482475e-06	4.73208789418985e-06
pos_639	2.66754803129652e-05	3.34423623655489e-05	2.25476268127916e-05	2.79918542743566e-05	2.60083500519171e-05	2.73574548963389e-05	2.69613169377119e-05	2.81029259476863e-05	2.59131430266871e-05	3.12204878860758e-05	3.34619479057325e-05	2.57482843557697e-05
pos_230	9.08015486408707e-05	0.000129999435857698	7.99642802522101e-05	0.000101884301434581	9.48109797196352e-05	0.000107798218218954	0.000103936582152315	0.000105359121819433	9.73006410675159e-05	0.000115834138156289	0.000136243897656403	9.25880975710823e-05
pos_492	0.000153341036005689	0.000212903063390111	0.000138566867657203	0.000166139080876746	0.000164054840992936	0.00017534549200115	0.000174691011306292	0.000173565028743269	0.000166177440830458	0.000189728356294583	0.000215559844800622	0.000158404169122928
pos_1773	2.15864136315186e-05	2.36183277511375e-05	1.85071623132884e-05	2.11572659203152e-05	1.53355544080098e-05	2.13869300909875e-05	1.9543131176057e-05	2.13369338575117e-05	2.15362683656342e-05	2.34004391618313e-05	2.57258809102752e-05	2.15424890952992e-05
pos_2069	9.48058033049042e-05	0.000122722307554705	9.01023178153144e-05	0.000114477017098436	8.21501751593334e-05	0.000102679409568202	0.000101365657349552	0.000102206356111345	9.9428781695928e-05	0.000106726019272076	0.000127762898675956	0.000109803845301653
pos_2205	0.000213984856803759	0.000248123633034943	0.000184581321987454	0.000227712558020664	0.000190796936059469	0.000209182369448579	0.000210227588012606	0.000214990481769389	0.000217787112422728	0.000222547065941459	0.000251889632773901	0.000212791796179292
pos_2538	2.46191408449343e-05	4.13329608806806e-05	1.64146079183835e-05	1.80708437508523e-05	9.42865630088846e-06	2.45405554426215e-05	1.68900101350101e-05	2.42307468119173e-05	3.29473173072875e-05	3.03055227676533e-05	3.87468135795868e-05	1.71922357480036e-05
pos_947	5.28489561165567e-05	7.42960268595057e-05	3.65278723150367e-05	4.59815276482843e-05	3.19767220502533e-05	6.18791655987858e-05	4.53170234752115e-05	5.380417484786e-05	5.96285262237171e-05	6.36025054945168e-05	7.14556457222744e-05	5.43281856687777e-05
pos_2612	1.61842435318096e-05	1.95244640379494e-05	1.42298111337889e-05	1.50701189464502e-05	1.48003330599151e-05	1.67922491743628e-05	1.85665760385837e-05	1.61477142270422e-05	1.72499737067871e-05	1.94210599464742e-05	2.00647174824632e-05	1.64891487601941e-05
pos_965	7.92469961644955e-05	8.94180757685107e-05	7.1225327895973e-05	7.62993107185152e-05	7.2012681256095e-05	8.28072710118366e-05	8.31755817951171e-05	8.12181165609921e-05	8.61924875606766e-05	8.45761050086941e-05	9.17027545342534e-05	7.99500824816078e-05
pos_1799	1.02623627347179e-05	1.39533912637114e-05	9.15061692391124e-06	1.04813763579049e-05	9.50003609602716e-06	1.20997001342599e-05	1.05041220189331e-05	1.23675757693311e-05	1.21660489791269e-05	1.51376179095604e-05	1.52789566634557e-05	1.18931584500344e-05
pos_2439	8.47121080014638e-05	0.000105976920491846	7.03242646261179e-05	7.33464241059544e-05	7.87866610836459e-05	8.98636570565857e-05	8.24613933656935e-05	8.91116518280092e-05	8.96557274813029e-05	9.45934343931497e-05	0.000110578813157716	8.52389659685712e-05
pos_2527	0.000105269556080405	0.000118252190014297	9.64349481341119e-05	9.85040192554956e-05	0.000102778392349572	0.000101079850209075	0.000104930746109167	0.000107865482330217	9.66782615559802e-05	0.000118855616533879	0.000114232957662997	0.000101152518996876
pos_2147	8.0497164855881e-05	9.47661433610126e-05	7.21495439321551e-05	7.75482978943982e-05	7.787078039366e-05	7.92191211417475e-05	8.10381066324324e-05	8.27398182391838e-05	7.82156882542097e-05	9.23394307896001e-05	8.81477010424826e-05	7.56962207234552e-05
pos_2608	6.46936117789252e-05	7.42535689743216e-05	5.88064816886072e-05	6.26100298356625e-05	6.19701249090267e-05	6.60135223600918e-05	6.37974535003557e-05	6.60986396296764e-05	6.05251733025153e-05	7.2929123938605e-05	7.21217691945652e-05	6.02842487522772e-05
pos_1265	0.0273831575505985	0.0341560532208161	0.0249425544199016	0.0271714701039639	0.0264078599026415	0.0295713171382779	0.0294020233508656	0.0296890458942431	0.0281711864656317	0.0313157670455457	0.0326151415264218	0.0283702881919584
pos_2822	1.93427893676954e-05	2.55594375094274e-05	1.82428972336352e-05	1.95969967680938e-05	1.81965812738461e-05	2.06027687527544e-05	2.13007003685719e-05	2.13791712223969e-05	2.08992064881873e-05	2.36208550296787e-05	2.35793160713346e-05	2.02136947449542e-05
pos_856	6.13675035195553e-05	7.73974044007027e-05	5.33136814298419e-05	5.92442924441694e-05	5.79046542278442e-05	6.29535295909077e-05	6.53469028513875e-05	6.41378914281802e-05	6.43179885921933e-05	7.07934189587622e-05	7.1507296358416e-05	5.73689802721005e-05
pos_2322	9.45619330348328e-05	0.000124429638416931	8.11388047388244e-05	9.1810967309245e-05	8.67634748419579e-05	9.56165612673457e-05	9.72920464191459e-05	9.67527028225337e-05	9.70786912205853e-05	0.000110525730698488	0.000114461747646748	9.27924185925843e-05
pos_2008	0.000268919041750782	0.000346831490100556	0.000243608564894768	0.000261797853068017	0.00025254395632783	0.000278905188408369	0.000292779495437226	0.0002828782799185	0.000286261257683609	0.000306247353299408	0.000319336939743101	0.000269821758340766
pos_2658	0.000578490496146921	0.000751468867815889	0.000522305194515345	0.000566813404726513	0.000546184672238363	0.000600323859397811	0.000625061802912379	0.000603938876021583	0.000610315962234195	0.00067711952252924	0.000686997389941389	0.000583637079481425
pos_2169	0.000822334247880501	0.00110844899825256	0.000762644825151853	0.000815151413306196	0.000798734695486567	0.000886097008599031	0.000899171894405748	0.000881345811102233	0.000881089525531699	0.00102080154232035	0.00104750046893106	0.000834812100558252
pos_2799	0.00147551501683089	0.00205821094532621	0.00140245965172438	0.00144045764734887	0.00145026063793072	0.00162736595940528	0.00163247048420185	0.00160923581146045	0.00158016193519605	0.00192876548398897	0.00189377427040587	0.00147548565531109
pos_927	2.65685639341734e-05	3.54686370050695e-05	2.44499296994263e-05	2.58680949736579e-05	2.67968417042368e-05	2.84674966101962e-05	2.88659094192887e-05	2.9762359253733e-05	2.91542105265107e-05	3.26569660269613e-05	3.36387947677917e-05	2.76624124915525e-05
pos_2189	0.00633480572670358	0.00825912747199961	0.0057784313743923	0.00603060598486737	0.00609827053611266	0.00680863410800591	0.00670657820032671	0.0067687600058824	0.0068003007562015	0.00745508685587055	0.00746036297543805	0.00642752153024936
pos_2687	0.00483045090618742	0.00649952542840324	0.00452186451235938	0.00485459713529972	0.00470986126408356	0.0054059861972777	0.00524925901606932	0.00535893149322621	0.00537362008631663	0.00586646343456515	0.0059650011539632	0.0049486744857357
pos_1006	1.72745918968914e-05	2.47177461398509e-05	1.53026882583098e-05	1.67980938319025e-05	1.68719669039963e-05	1.85653416621923e-05	1.80124418692465e-05	1.85996129911411e-05	1.84247640538446e-05	2.20337767924986e-05	2.27768189119798e-05	1.57316370359164e-05
pos_1893	2.62662318812692e-05	3.19623384376055e-05	2.35820136609035e-05	2.52517048892366e-05	2.50257181257686e-05	2.6581858896287e-05	2.55141154817294e-05	2.68552428403513e-05	2.65341701097922e-05	2.95510427657528e-05	2.9609456919924e-05	2.41607022457286e-05
pos_2617	3.18200673789147e-05	4.52727615446724e-05	3.02001364459962e-05	3.21093365726748e-05	2.9319912447283e-05	3.36427564332278e-05	3.40969068361802e-05	3.30446164171191e-05	3.38947121389248e-05	4.23184027977601e-05	4.14433315809752e-05	3.19116201440629e-05
pos_983	2.40114688960187e-05	3.14422938381088e-05	2.30525138094472e-05	2.4906933827363e-05	2.36139378702409e-05	2.43895745824799e-05	2.57904232184679e-05	2.51624350961911e-05	2.51138531336483e-05	2.91827026640743e-05	2.9925391480731e-05	2.45710889151986e-05
pos_2734	4.9332346197701e-05	6.37253634403989e-05	4.65910736102414e-05	5.1277213379641e-05	4.90222895265381e-05	5.37698103274383e-05	5.38263971639904e-05	5.56717445749945e-05	4.92439239846308e-05	6.35169760837989e-05	6.02507914796559e-05	5.07149538151887e-05
pos_628	3.36637037118329e-05	4.37979617390438e-05	3.27206335616509e-05	3.55100778003974e-05	3.43533455122791e-05	3.77912053987938e-05	3.92252303315918e-05	3.88329977763431e-05	3.76029935822636e-05	4.54733793886955e-05	4.41134856634531e-05	3.641282062148e-05
pos_2757	2.15205527164738e-05	3.02132599047813e-05	1.89540049520389e-05	1.97289860069739e-05	1.89541200389673e-05	2.51367712121653e-05	2.22475110160323e-05	2.47715722171779e-05	2.25274429388188e-05	2.69948205629164e-05	2.82428559769806e-05	2.12463151540937e-05
pos_2370	8.11024478207463e-05	0.000143067785489457	8.3065976540967e-05	8.78652995172454e-05	8.79941833075566e-05	0.000115849437153238	0.000108800054999529	0.000112603549770195	9.80657788802937e-05	0.0001411538090685	0.000145054379702656	9.1802281809478e-05
pos_2512	0.000199237064660531	0.000280649472934069	0.000194944331401026	0.000209285114280883	0.000200764208378094	0.000239722443217579	0.000233915616280884	0.000234892528254504	0.000218916522878535	0.000260137115246717	0.000257676324820858	0.000208746131249508
pos_693	1.32116192434419e-05	2.00319203531375e-05	1.12326198066566e-05	1.12836211980173e-05	1.57830965179358e-05	1.284115093655e-05	1.58513023882035e-05	1.65892340739719e-05	1.59974559349861e-05	1.96071853949856e-05	1.79110085977547e-05	1.18397260808529e-05
pos_1202	4.58651798769956e-05	6.43882268553837e-05	4.59770147057022e-05	4.41009999140548e-05	5.51398458625842e-05	5.08335504653149e-05	5.39381544496468e-05	5.28947931271143e-05	5.43414876849152e-05	6.17879773022642e-05	6.19882652972679e-05	5.47872466502316e-05
pos_2410	7.45564521350911e-05	0.000103125132044607	6.81772107519798e-05	7.36349943825033e-05	8.18993357424875e-05	8.36126024702003e-05	9.00691736488847e-05	8.66355672109073e-05	8.12851964141011e-05	9.44763799035613e-05	0.000102099081206779	7.81194000310232e-05
pos_1989	8.51892870362725e-06	1.75656808251116e-05	8.06578869760758e-06	8.80808568036865e-06	9.60465554106687e-06	1.08513883407423e-05	1.32570797906345e-05	1.03354396262317e-05	1.16342709206156e-05	1.49842192232464e-05	1.40096490556335e-05	1.08760718713834e-05
pos_895	3.45074607454387e-05	6.85223551784798e-05	3.01095060174205e-05	3.43290251328242e-05	3.99038881632921e-05	4.00977921515341e-05	5.20525117434638e-05	4.04818115847894e-05	4.66720696438088e-05	5.65129421531631e-05	5.79341280237328e-05	4.16887535252426e-05
pos_1642	0.000188190404887723	0.000250160072430365	0.000177840855389861	0.000199357203463169	0.00019544740465807	0.000210304823669846	0.000217301756970972	0.000212925547718925	0.000218608809766453	0.000227513976616376	0.000232520130119022	0.000204703001142343
pos_864	1.05707914891659e-05	1.48356182392103e-05	8.97094997628571e-06	1.04713014237026e-05	1.02264623184753e-05	1.12701258021319e-05	1.25024009572811e-05	1.19004803864125e-05	1.28586055342034e-05	1.2840136249351e-05	1.38207350642739e-05	1.16304833828767e-05
pos_1217	9.06395076807128e-06	1.29118750872189e-05	7.60104666030503e-06	8.94566019761052e-06	9.07406107505502e-06	9.03246116885924e-06	1.07364661622379e-05	9.61923895050197e-06	9.92857915432556e-06	1.10881490077738e-05	1.1952858368598e-05	9.34733912384253e-06
pos_2021	4.34161190928075e-05	5.47181895588226e-05	4.17671433625581e-05	4.71005948224416e-05	4.64228354463699e-05	4.61132558849868e-05	4.95304231647015e-05	4.73706649936638e-05	4.92968916089671e-05	5.08218911186655e-05	5.24246361755126e-05	4.77262430302415e-05
pos_1343	3.16717766270441e-05	3.85051518905014e-05	2.60870942943951e-05	3.02187771727824e-05	3.1779555503327e-05	3.22925731498529e-05	3.3299571693899e-05	3.26610406959695e-05	3.4151243273245e-05	3.53332791573456e-05	3.43853873818067e-05	3.15807340422501e-05
pos_1097	0.000140286683351745	0.00016709267303867	0.000119040218748802	0.000141430562969018	0.000136654178525408	0.000130605438083034	0.000145985097081291	0.000141245855012461	0.000148123294552938	0.000159518780344662	0.000151522325007385	0.000137381942570948
pos_304	4.51902200352049e-05	5.40263362648714e-05	3.73044844431376e-05	4.38941654095796e-05	4.28262137924942e-05	4.40757730842688e-05	4.88817276293957e-05	4.46625904360769e-05	4.94456882132097e-05	5.1692086390972e-05	5.15899256853957e-05	4.12766044687833e-05
pos_1358	4.23482387234368e-05	6.07662891009611e-05	3.73490795335637e-05	4.38845140039926e-05	4.28047019229227e-05	5.24327806963118e-05	5.31157719394843e-05	4.85354846542403e-05	5.59494189725341e-05	5.79901350944425e-05	5.54048509199359e-05	4.7024983320669e-05
pos_1629	0.000199023354274727	0.000236699912332784	0.000173328560908109	0.000195410387299717	0.000190920512365926	0.0002131036716824	0.000210697565912414	0.000206533524548154	0.000217102349369922	0.00022232976180513	0.000216916735809925	0.000199014046756049
pos_261	0.000179428379581738	0.000221448282969291	0.000151357822327817	0.000168437466105303	0.000165291098040345	0.000193656651866008	0.000193998993040339	0.000189655114564521	0.000200927589902023	0.000212206881959395	0.000203543861559034	0.000174900372990387
pos_2714	1.72007986908107e-05	2.58025517956837e-05	1.75548883957284e-05	1.94895866175411e-05	1.77974008215437e-05	2.1297467718663e-05	2.14068217396426e-05	2.23290652083053e-05	2.15413895254117e-05	2.3460118928116e-05	2.25738196962507e-05	1.9091996542795e-05
pos_2039	7.97340477300967e-05	0.000105453126584152	7.55574524602759e-05	8.56880187939669e-05	8.23548200761938e-05	9.05623837297313e-05	8.98624630405508e-05	9.09025786391684e-05	9.02661519314715e-05	9.71878006570678e-05	9.39269409072598e-05	8.48638134631604e-05
pos_677	8.06792116643456e-05	0.000114760887555833	7.36852219620292e-05	8.26257481832934e-05	8.43541694782079e-05	9.41569886563769e-05	9.25982690253879e-05	9.43460681821731e-05	9.83566354192708e-05	0.000105426902494084	0.000101478180467303	8.38762792522399e-05
pos_2762	2.85703366762899e-05	4.65946916865864e-05	3.10825060467566e-05	3.04998273617385e-05	3.47608037833296e-05	3.67551754116518e-05	3.74281903078208e-05	3.67274750529538e-05	4.41296877364402e-05	4.54323152046334e-05	4.72295510148998e-05	3.22576847795281e-05
pos_1745	2.05546588562757e-05	2.80757907429807e-05	2.03449707637331e-05	2.29097265853325e-05	2.14322250279891e-05	2.49247296832423e-05	2.33661190282197e-05	2.47261699058407e-05	2.88665021749051e-05	2.75749458446274e-05	2.51158392249376e-05	2.05044600755337e-05
pos_1421	0.00194937887700943	0.00298057290385279	0.00203883161756703	0.00210398624717277	0.00218715896937978	0.00240836535992201	0.00224942362537646	0.002359164166568	0.00257125254207051	0.00275121162099079	0.00258016317010493	0.00201890870935798
pos_2206	0.00486812864754613	0.00686913567366282	0.00507226308488003	0.00528879958255302	0.00552961554576932	0.00612123372738505	0.00566265593727248	0.0060918793625918	0.00646259650185054	0.00700979945069218	0.00594041327015174	0.00518277204811119
pos_1889	0.000133799114460643	0.000192550682729663	0.000136427020189274	0.000150818917145546	0.000157484000505971	0.000157880714294325	0.000156488232008712	0.000144398243084318	0.000153356147810821	0.000178473767624696	0.000174744564697065	0.000147716268628443
pos_1574	0.000275395978068345	0.000343749818629357	0.000249104034203198	0.000298256532538179	0.000268626748749635	0.000302505190312165	0.000298911996494173	0.000281607312148153	0.000303482359268216	0.000341659833842891	0.000347686981165068	0.0002828025909721
pos_2131	5.60534289838857e-05	7.03678216105668e-05	4.97889096458312e-05	5.98933311434559e-05	5.33430502753486e-05	6.15147241890116e-05	6.2006997950288e-05	5.62405543506944e-05	6.08345886424687e-05	7.03793513347929e-05	7.02552320796946e-05	5.78998380844529e-05
pos_64	0.0005104771915586	0.000733013503430025	0.000497591864705976	0.000592190904360231	0.000535969898564337	0.000613194314977947	0.000596341441673775	0.000586169038858396	0.000610536018087228	0.00071105982608516	0.000722495144312125	0.000577008454068358
pos_650	1.9961869892202e-05	2.82964530762259e-05	1.9872957184962e-05	2.30463736120143e-05	2.08640192611359e-05	2.37398038515069e-05	2.33709934009496e-05	2.25551960953728e-05	2.31649661464362e-05	2.66281370692497e-05	2.63544929915045e-05	2.31768153154265e-05
pos_1396	0.000142768116863129	0.000186646356196267	0.00013250174724531	0.000154471513975638	0.00014584165251344	0.000152143507383544	0.000158407381944778	0.000151945523129179	0.00015820504838833	0.000173473488736085	0.000172917240210142	0.000147912436145578
pos_217	2.83030404270828e-06	4.58126622142134e-06	2.50371361130897e-06	3.16960400165347e-06	2.96753550856787e-06	3.3266826149252e-06	3.75133558748415e-06	3.34669857958829e-06	3.55902605306828e-06	4.43596217085492e-06	4.24896303371306e-06	3.39068301326672e-06
pos_1413	1.68642401286173e-05	2.64248257985128e-05	1.83217033170653e-05	2.2028479153388e-05	1.90531723205353e-05	2.25747690951709e-05	2.24639456198562e-05	2.09168980885557e-05	2.31610548018973e-05	2.45926285021102e-05	2.66534190805228e-05	1.89355672565866e-05
pos_2438	0.00380471028414881	0.00492283167566553	0.00340357954066029	0.00423000617180833	0.00397383545775824	0.00436640792312695	0.00429429283609375	0.0040862250742413	0.00441955998505312	0.0045545030794792	0.00486115766099175	0.0039183068194884
pos_1206	7.27064369007252e-06	1.42939610549604e-05	8.9749711747386e-06	1.04929347351666e-05	9.66996525850471e-06	1.04669160986437e-05	1.17467942485928e-05	1.12422895067308e-05	1.17328990151361e-05	1.22896722389786e-05	1.24884891290246e-05	1.01098258739133e-05
pos_886	8.81355795805098e-06	1.36281574533461e-05	9.22423301312377e-06	1.0704053550186e-05	9.962223059837e-06	1.04612078029444e-05	1.13072786626805e-05	1.10846375619153e-05	1.10465765380876e-05	1.18576364184809e-05	1.1997793133731e-05	1.01054673668065e-05
pos_1888	3.01386712666339e-05	5.40038178010607e-05	3.5364194032039e-05	4.22672931571562e-05	3.61276211745353e-05	4.52829074759436e-05	4.4888303341361e-05	4.18842280787776e-05	4.07208032761835e-05	5.69258942153764e-05	4.78373524626097e-05	3.91414093765988e-05
pos_2277	0.000141091311346479	0.000200980008585033	0.000151255333889612	0.000166362528615165	0.000164775877387715	0.000191427369543602	0.000186631330930068	0.000182892682958729	0.000175885561217529	0.000205072951492111	0.000207660002618156	0.000177732787977145
pos_2780	8.40027932782565e-06	1.17086616709048e-05	7.27089143622898e-06	8.45958915142494e-06	7.20398358225312e-06	8.9405090040736e-06	9.97672665403604e-06	9.8692045449735e-06	9.40668273822107e-06	1.12393828553785e-05	1.08197631559745e-05	1.03109708643704e-05
pos_1306	4.81448042470606e-05	5.78660839260259e-05	4.48317738257783e-05	4.79680545125029e-05	4.78284186052174e-05	4.92163117057226e-05	5.17078678276201e-05	5.21847437642022e-05	4.98970936001761e-05	5.369684017699e-05	5.26647981351269e-05	5.01532952251061e-05
pos_880	6.2457215621961e-06	7.99579920510603e-06	4.70188759520062e-06	5.94510220135286e-06	5.67812314210909e-06	5.97092822357743e-06	6.27609655838334e-06	6.65762305917594e-06	6.22258203920629e-06	6.89835788231978e-06	6.98082930525316e-06	6.92437869576541e-06
pos_906	1.65540497380371e-05	2.74209047985839e-05	1.48459483210952e-05	1.61278549671858e-05	1.57389055342805e-05	2.04068119138777e-05	2.09648502195169e-05	2.02209979858412e-05	1.93648812754359e-05	1.94267091717256e-05	2.03583013997669e-05	2.10749298864371e-05
pos_1977	0.000293741593655451	0.000414597351461274	0.000259571851265347	0.000283625263611721	0.00026512134162911	0.000320762218614795	0.000323475544354347	0.000311371771480149	0.000349949951193085	0.00033353099729771	0.000338250457744441	0.000354848707627092
pos_2499	0.000312483033766758	0.000397872306414143	0.000276503780643919	0.000294759638685652	0.000290965921287374	0.000322499772584936	0.000331266816421276	0.000330668050245447	0.000357944318966762	0.000355925571594243	0.000339457723743958	0.000344340369753164
pos_2433	4.62909732811988e-06	7.43212584228288e-06	5.27535285887455e-06	5.72971867168189e-06	4.46683529449396e-06	5.9949464069384e-06	6.45591685156147e-06	5.64158472225204e-06	5.92086018817476e-06	6.82248518420545e-06	5.64218467521365e-06	5.68710959147528e-06
pos_1578	6.61891043759364e-06	1.24377696659462e-05	8.31626859677461e-06	6.34103807306437e-06	6.22710686963737e-06	8.28111940882954e-06	8.90402077392389e-06	7.67469774468486e-06	7.56582027671859e-06	1.2415752769592e-05	1.29877700828047e-05	8.21658694413479e-06
pos_2317	6.57019797794979e-05	9.59767505879802e-05	6.97299692465111e-05	7.14659446550055e-05	6.31740285457349e-05	7.52897959117742e-05	7.61449448434273e-05	7.38348090197468e-05	8.35208763538272e-05	9.03413903566177e-05	9.21445626589482e-05	7.21282134656777e-05
pos_433	5.87639610839522e-05	7.45950876635666e-05	5.95360304516366e-05	6.23210511385767e-05	5.36898735919489e-05	6.30317647704191e-05	6.4055821575752e-05	6.37772005611766e-05	6.59156404458601e-05	6.81837862986909e-05	7.59476475333652e-05	6.11890630837545e-05
pos_1539	1.13734088023686e-05	1.65022855804753e-05	1.21602707986316e-05	1.08659197155866e-05	1.16175131893683e-05	1.25120490543796e-05	1.18434282500991e-05	1.1960528153888e-05	1.22681468944696e-05	1.36287740545991e-05	1.38774773303446e-05	1.17847489963322e-05
pos_1349	2.421141771244e-05	3.04387274509037e-05	2.26713872592574e-05	2.17498432384074e-05	2.23717341569504e-05	2.47734927623419e-05	2.49347026720107e-05	2.46424778713394e-05	2.53206073315873e-05	2.78098103379943e-05	2.7298347758023e-05	2.46888131854905e-05
pos_1562	5.52998123354008e-05	8.35900999331551e-05	5.85715455418072e-05	5.59996097694856e-05	5.41909956212396e-05	6.83089129006078e-05	6.72299392954742e-05	6.60484728679815e-05	6.75917085917391e-05	7.89204526801208e-05	7.71076759658416e-05	6.64758600494145e-05
pos_1803	7.3423072928433e-05	7.55052064226236e-05	6.40831991854902e-05	7.76926881431378e-05	4.20768710541711e-05	6.78436261148825e-05	5.68277208343466e-05	6.79957019786151e-05	7.16127022804521e-05	8.81443552623008e-05	7.12373025757671e-05	7.05107427117208e-05
pos_206	1.53088089763209e-05	2.01126442539715e-05	1.36808780465253e-05	1.88845605139785e-05	1.12513461049729e-05	1.52505063843722e-05	1.20401288106539e-05	1.75571017164282e-05	1.63681765660949e-05	1.93360793035363e-05	1.50146598248848e-05	1.60843948423782e-05
pos_1515	3.3505787445601e-05	3.42558654384758e-05	2.05125415776946e-05	2.21115084508951e-05	2.09257406550205e-05	2.51346218925268e-05	2.32326417302956e-05	2.6982864646933e-05	2.03076257564728e-05	3.24863454422449e-05	1.96189722936115e-05	3.37852475498052e-05
pos_2625	3.38965178563492e-05	3.35535351822031e-05	2.10654924259202e-05	1.5388421559725e-05	1.65179104928299e-05	1.94186364673103e-05	1.7316839467909e-05	2.32097308119941e-05	2.09899332849832e-05	3.73341580527283e-05	1.7336716619337e-05	3.03795219176845e-05
pos_1398	4.25034274246691e-05	5.31746026636744e-05	4.09883459991341e-05	3.92891622949329e-05	3.10966700280669e-05	3.92204388896029e-05	3.86845975148939e-05	3.97238610570243e-05	4.2656282310661e-05	4.73275410381517e-05	3.72814781927738e-05	5.23552650896038e-05
pos_526	1.31545876425708e-05	1.64873876034627e-05	1.33451380426564e-05	1.29203473698319e-05	1.15000994527795e-05	1.17785926349661e-05	1.19163196964962e-05	1.24003166848149e-05	1.22255121807952e-05	1.44974923543866e-05	1.11617593652718e-05	1.45646935329027e-05
pos_978	2.5123042005791e-05	2.77490192246814e-05	2.33521433649718e-05	2.54607495364634e-05	2.19233382555801e-05	2.54475949310112e-05	2.45315644989383e-05	2.42795587367613e-05	2.30380375999052e-05	2.78812502567022e-05	2.72962343153592e-05	2.33691316900172e-05
pos_785	0.000782713590380297	0.000972816636877189	0.000711369107209524	0.000843899236383095	0.00075252585309625	0.000831381298826784	0.000777171348834158	0.00078083031077136	0.000785870451457075	0.000926957924717042	0.000882990176032613	0.000762369564217929
pos_687	0.00102085897925639	0.00124559845601154	0.000922531321066539	0.00107087459333202	0.000974935553302013	0.00110114627980757	0.0010246072196007	0.00102967334307827	0.0010227807116113	0.00123087297624515	0.00122096252166104	0.00100905138496405
pos_817	0.00224539704641052	0.00283318667504751	0.00207180163089456	0.002440519183431	0.0021885896541515	0.00245943495603129	0.00235980084458219	0.00229352318240284	0.00233851133997847	0.00271750870787656	0.00266580603353988	0.00224828027145024
pos_1723	0.00119387954012124	0.00144539670573145	0.00121437942561365	0.00127272914373688	0.00120801857517681	0.0013385520391035	0.00128655714540516	0.00131393942189509	0.00118667962821314	0.00139000236392995	0.00130432450223398	0.00129081274376345
pos_2337	0.000217336733455198	0.000264117085481984	0.000207323946927564	0.00026299592127613	0.00021296632765557	0.000268569642600063	0.000232893464485687	0.000239098833641428	0.000196862902980356	0.000274808271170358	0.000242188439951855	0.000228683303929826
pos_1872	0.000122898251414371	0.000154331308628527	0.000127381631771754	0.000109776439741095	0.000117959128973294	0.000138924162621536	0.000125259534281989	0.000134962612325546	0.000133277857875635	0.000156307068957504	0.000136456291763261	0.000142424888348292
pos_2120	5.06157564982006e-05	5.54654863326717e-05	4.68880634714245e-05	4.50406252115027e-05	4.9353065857406e-05	5.34072077145685e-05	5.33345094716802e-05	5.41332653531285e-05	4.91001953351963e-05	6.03112036154211e-05	5.08986836105749e-05	6.12909023535472e-05
pos_575	2.75354847541096e-05	3.90591033898664e-05	2.51370606390775e-05	2.17026069619108e-05	2.13330019904398e-05	3.20413384844328e-05	3.50464837672864e-05	3.11221073894797e-05	2.04236479440893e-05	4.51118625014759e-05	3.271844656772e-05	3.6017075649683e-05
pos_597	0.00323525496873492	0.00380872655669279	0.002004681420621	0.00262025876912165	0.00248922314380684	0.00381012112313133	0.0034687844916153	0.00366222611068427	0.00392125501630276	0.00445690689321737	0.00355028250822219	0.00346163198770379
pos_707	0.000203881133403934	0.000248627276401985	0.00013694531267317	0.000207361235023959	0.000158623464001345	0.000254455545104402	0.000232053482253012	0.000241776417229401	0.000272111158760264	0.000313058280872905	0.000266651503111499	0.000256879106468888
pos_1096	6.97059379009096e-06	8.82416436862381e-06	2.57266876458473e-06	3.86645759580093e-06	4.10093553136026e-06	7.50615976033672e-06	5.94746074923862e-06	6.79336496773085e-06	5.35188354301671e-06	7.79471130239226e-06	7.33869270545804e-06	7.57344274390507e-06
pos_1410	9.71708229583566e-05	0.000111902191277403	8.38251442898298e-05	7.9983547623316e-05	6.79614593548627e-05	0.000106638841296889	9.64876052526072e-05	0.00010375299449096	0.000102064926532246	0.000109279891068432	0.000114885981956088	0.000110555795503347
pos_606	0.000169216035469563	0.000197486541300825	0.000138270980572908	0.000174581843341222	0.000201765360101703	0.00019393010940336	0.000210530735226558	0.000179096754650632	0.000201322214778289	0.000156350205698652	0.000159429962464343	0.000187424198849807
pos_674	0.000198224843621704	0.000217541855056894	0.000143623085499421	0.00017889808019504	0.000222153322607593	0.000209642496521904	0.000235222890454292	0.000196621353840337	0.000207013998162587	0.000176381823414194	0.000193641420606006	0.000207722387402979
pos_851	0.000128425643357036	0.000145314103995473	9.64679331959859e-05	0.000117449052725242	0.000150205797183894	0.000142371497111627	0.00016271321114096	0.000128344628039822	0.000129042287945757	0.00012006522414776	0.000114656723530673	0.00013099279712651
pos_2229	1.18531416430868e-05	1.21221854490714e-05	1.09707852574034e-05	1.24577164364554e-05	1.23845837680716e-05	1.39047517751989e-05	1.42305160382724e-05	1.21775227933782e-05	1.21295261943148e-05	1.26538897229128e-05	1.13578758031654e-05	1.30469842333254e-05
pos_1983	1.77460712299299e-05	1.74285249320361e-05	1.11723136870947e-05	1.16381397186572e-05	1.86146284266752e-05	2.09860736728627e-05	2.35247667403183e-05	1.56166361957998e-05	1.50329557652063e-05	1.67971737510355e-05	1.53333725858858e-05	1.84484466283848e-05
pos_813	9.72596848981928e-06	1.13037571231188e-05	7.09041326264312e-06	8.22420125613484e-06	1.09383550251675e-05	1.14171847861244e-05	1.26596486636994e-05	9.5994514088847e-06	8.83613406000483e-06	9.40904221610306e-06	9.10520836111222e-06	1.12648724938104e-05
pos_1713	8.28308384472386e-06	8.21797898361499e-06	1.78821892721777e-06	4.60443360702987e-06	6.96972886713317e-06	8.38387125573093e-06	9.81934858903561e-06	8.01368983508635e-06	9.89075632430076e-06	5.8688189093146e-06	7.91367859341036e-06	9.36809835662936e-06
pos_1626	0.000128296888814361	0.000134483435930325	9.7014767292097e-05	0.000121466993667867	0.000125557323573814	0.000125317786909469	0.00014256414317575	0.00013285525592535	0.000144478263331222	0.00013297951817512	0.000141120252279814	0.000152999615859303
pos_2819	2.25773783290523e-05	1.97864935545942e-05	1.5336523539208e-05	1.90928395342569e-05	1.87625375297194e-05	1.92531045595998e-05	2.50435491740722e-05	2.22702058796621e-05	2.49044107899811e-05	2.01327059989706e-05	2.22848921712028e-05	2.57030401078661e-05
pos_2629	0.000106736907964084	9.47978906420778e-05	6.16759768151825e-05	9.52524693081828e-05	0.000117966865988552	0.000105304642803883	0.000126611130812628	0.000122587134942757	0.000142592155097802	0.000103054366408321	0.000110981550517934	9.66013190636712e-05
pos_132	0.000127558715619372	0.000113611209359602	7.20911765895505e-05	0.000118852363636095	0.000161421821618466	0.000133113990206956	0.000152388478310156	0.000152498285543868	0.000184571664217063	0.000156238813546515	0.000171969931895308	0.00015562813017119
pos_484	4.81574703521556e-05	4.98997638713477e-05	3.2215297737195e-05	4.19907986049658e-05	8.14504680065577e-05	6.022319598577e-05	8.0033310671245e-05	7.59715020738212e-05	9.6476156417573e-05	8.02132087820679e-05	6.23193712269466e-05	9.00117562265995e-05
pos_148	5.90634475165761e-05	6.04671858198486e-05	4.99388968878232e-05	4.98064658287855e-05	7.71322523439102e-05	7.35679929783673e-05	0.000112896183002214	7.90600502633391e-05	9.48257431033798e-05	3.75915513611593e-05	8.05875774831514e-05	7.21872230579102e-05
pos_643	0.000234723368216704	0.000155336563980896	0.000202482167469629	0.000260376582240754	0.000238527461356578	0.000246121475596114	0.000388898882222957	0.000259128376620346	0.000300975747799681	0.000225303438273199	0.000246874209904949	0.000265871110741339
pos_1171	5.01115788628649e-06	5.3193014876712e-06	5.82932272762863e-06	4.72660452595878e-06	6.5855495334698e-06	6.43541383145748e-06	1.0151030130447e-05	6.46026809507901e-06	8.53223326568722e-06	7.5998279758267e-06	7.05906392484538e-06	9.30280746989828e-06
pos_929	1.42948379185399e-06	8.53125423365086e-07	9.15805348603116e-07	4.65518944994938e-07	1.76497882604629e-06	1.80127826740193e-06	3.55518435092359e-06	4.62522640172193e-07	2.78383673469728e-06	1.45531788179507e-06	6.94018991535382e-07	1.6160762914982e-06
pos_1150	0.000207613115783886	0.000185180540263676	0.000151575413079437	0.000184649679281645	0.000280175496118886	0.000214015643375558	0.000278484596259226	0.000267203344635357	0.000255722475878777	0.000268864722093845	0.000240533712572556	0.000313248453386198
pos_497	0.000108254262777334	9.72525050384548e-05	7.74175258871023e-05	8.4558408295312e-05	0.000187509886582556	0.00012919198348139	0.000189938983187056	0.000182365105643598	0.000164320104578206	0.000204436690197697	0.0002139280355542	0.00027018071457303
pos_663	1.4310497691325e-05	1.32664465124293e-05	1.29513039772099e-05	1.59444122389141e-05	2.02035645639391e-05	1.52016725454366e-05	1.96319659838073e-05	1.77189415746886e-05	1.76437909442251e-05	1.77701415678675e-05	1.79509990813566e-05	1.93326342918752e-05
pos_83	0.000109180432297386	6.48127336591441e-05	6.08211266368244e-05	9.18186445404411e-05	0.000136803277041327	8.84420071811391e-05	0.000133553408260513	0.000125166949184939	9.97165066872565e-05	0.000119033449686916	0.000119142848218602	0.000150647820531752
pos_2116	1.52697762238003e-06	2.56135126787903e-06	1.80169659742993e-06	1.98289427085232e-06	7.37196863795522e-06	6.44846934652694e-06	8.33411816722981e-06	1.03433216558079e-05	7.66128109101983e-06	5.17914871013811e-06	1.09924514507118e-05	1.18353330205944e-05
pos_1748	0.000739070936396338	0.00116183960014767	0.00079189780045183	0.00116854563934902	0.00144261569257606	0.00130210880700326	0.00202305849884612	0.00187253078554046	0.00159304370610495	0.0016326040923172	0.00264380790903809	0.00274294887137333
pos_651	5.89122130112643e-06	5.69368232247247e-06	5.70939154964813e-06	7.37830940515874e-06	7.7396151114552e-06	7.92537009624985e-06	8.94201975205297e-06	8.68802614036398e-06	8.30855610468376e-06	7.66218430922436e-06	1.08712398064005e-05	1.14780774534492e-05
pos_78	2.20293539055368e-05	2.99114703689423e-05	2.12565232839239e-05	2.62146926302708e-05	3.19457241714092e-05	2.73831178814384e-05	3.59917192954163e-05	3.30655657420486e-05	3.28122135174044e-05	2.57096565969071e-05	3.23515039039629e-05	4.09373178861702e-05
pos_44	0.00173695121507966	0.00238367765022431	0.00179119003577206	0.00219052033506473	0.00300511445248268	0.00223731829680848	0.00308557909548833	0.00283184877528092	0.00301813617784007	0.002602382349115	0.00300606678489765	0.00382017085847451
pos_529	1.14918674895642e-05	1.51010737266287e-05	1.28158077133298e-05	1.58653021741188e-05	1.93788425786964e-05	1.4635777320698e-05	1.94310263635561e-05	1.80747672969931e-05	1.80480378755745e-05	1.56852530727645e-05	1.75181696797191e-05	2.53674031350223e-05
pos_155	0.00012213912036194	0.000196715811787959	0.00011733676585209	0.000171396089046219	0.000205546423920098	0.000168264943496405	0.00022266117923702	0.000222927567100571	0.000173217714633264	0.000214530516039301	0.000238628403180554	0.000261807355813688
pos_2844	6.95520737875956e-05	9.14393466113684e-05	6.14799549726085e-05	8.45233223709531e-05	9.10874491445775e-05	8.6944639496807e-05	0.000111335180288767	0.000106278938779019	9.39835697446357e-05	9.27676513203159e-05	0.000119304672601133	0.000145915672409268
pos_1083	0.00235551463032745	0.00341165809646247	0.00232697166691747	0.00315293510489168	0.00381583706193539	0.00338554841617111	0.00464236761803373	0.00442686937113818	0.00373293426472837	0.00417403503272438	0.00505944210863012	0.00583910517955017
pos_88	8.46871600893736e-05	0.000132618456858284	8.46379651717809e-05	0.000120165224249043	0.000139976352377379	0.000117467529354642	0.000158361802044733	0.000156250316125939	0.000129054504206375	0.000142328621003814	0.000172561494897252	0.000193033945700666
pos_437	1.59603438026207e-05	2.12549144473673e-05	1.72092155606542e-05	2.02013519256367e-05	1.98260757141176e-05	1.8687003780707e-05	2.06395837594609e-05	2.01662989461112e-05	2.30831697243284e-05	1.80040974144243e-05	1.81441168274092e-05	2.29272356485373e-05
pos_790	1.13246180202467e-05	1.61184030406619e-05	1.13264435747687e-05	1.66784927050904e-05	1.49934335350397e-05	1.36970562162887e-05	1.61554217459015e-05	1.56798001286502e-05	1.50450381621121e-05	1.40743215322712e-05	1.56335391190289e-05	1.82797519706699e-05
pos_659	1.13773937606671e-05	1.52586066896035e-05	1.23713590292549e-05	1.60212715065971e-05	1.55471697304735e-05	1.32086357406202e-05	1.67875201867441e-05	1.63811009868414e-05	1.55587587260224e-05	1.41676100222133e-05	1.40714402639578e-05	1.87447260724773e-05
pos_961	2.42301594677271e-06	3.14453359431656e-06	2.61151272178569e-06	2.91159105042013e-06	3.08296971494107e-06	2.46587920194764e-06	3.27837810520113e-06	3.22180851041906e-06	3.20426702980981e-06	2.74559446467539e-06	3.01129442875517e-06	3.689265697222e-06
pos_949	1.40004728208629e-05	2.14853215277526e-05	1.9542647002028e-05	1.8626081470521e-05	1.99340173336568e-05	1.8208155023445e-05	2.44794903235338e-05	2.09714264193839e-05	1.90115018382221e-05	1.82158433439914e-05	2.27363479388946e-05	2.48912695828831e-05
pos_1334	0.000254399988050147	0.000762739202962404	0.000434822675468574	0.000627204499842167	0.000576998075166454	0.000524058972487762	0.000988384093429528	0.00073015790217037	0.000542228070809575	0.000628770182933209	0.00107482059960423	0.00102759437664897
pos_65	3.18549536258197e-06	5.35992384486952e-06	4.38079510344245e-06	5.00269794071354e-06	5.0859513760165e-06	4.57118277500349e-06	5.67455643402464e-06	5.02711672918897e-06	5.01476008744978e-06	4.87398054912102e-06	6.0959046287711e-06	6.47388625565607e-06
pos_1960	0.000240120400989028	0.00102639617705921	0.000584796595524747	0.000785374431105196	0.000625971729194094	0.000656951828942373	0.00105429772761441	0.000856199333464628	0.000775431583084256	0.000969903228876971	0.00110199314289853	0.00106663387407993
pos_388	0.000449402744038741	0.00106995438779577	0.000777654809013148	0.00115921418136173	0.000855229740331671	0.000838418947059923	0.00116781501765228	0.0010889977074054	0.000809289620122085	0.000924101053757498	0.00119710105841041	0.00112060458773437
pos_349	9.36891139046527e-05	0.000135386621388468	0.000147224564546668	0.000145567768790424	0.000171773608446534	0.000141709458043072	0.000180903903665479	0.000153760059947193	0.000153561320158193	0.000136697929823718	0.000176537328446951	0.000180631504080656
pos_1764	2.34567052014201e-05	3.29584618938512e-05	3.67771965030342e-05	3.21597900467577e-05	3.5414501740554e-05	3.17086266847333e-05	3.93652513046372e-05	3.39511193243244e-05	3.55868596152083e-05	3.41199369491159e-05	3.66196781243977e-05	3.79384647407912e-05
pos_2626	6.40209351937474e-05	8.36187874880198e-05	8.95618197792322e-05	7.66855181207664e-05	8.84647790935073e-05	7.9381364461897e-05	9.74057443504298e-05	8.36289457659447e-05	8.7718050943596e-05	8.25405157581504e-05	9.42598079739901e-05	0.000100075013333925
pos_1347	4.24099807436897e-06	5.38725000230506e-06	5.46529717413635e-06	5.95688276336644e-06	5.39266050009931e-06	5.36196926011316e-06	6.90302407684911e-06	6.20198315186751e-06	5.80958631703303e-06	5.73398984873798e-06	5.88934074340801e-06	6.8049647913759e-06
pos_2576	8.9562602564984e-05	0.000135434771791295	0.000116675387062521	0.000131526325457493	0.000157592764054044	0.000133493503493901	0.000189344946287217	0.000149432589770252	0.00015218509141268	0.00014126070687177	0.000158393851090148	0.000160410768689247
pos_2724	0.000577563811297232	0.000632328256703711	0.000723571721071616	0.000856735401603917	0.000878224954585378	0.000828642449212498	0.000939991933968553	0.000733277591167959	0.000757451408994644	0.000761844693620069	0.000795164966871898	0.000738956692393365
pos_1475	0.000105164732454102	9.80306290752893e-05	0.000125492732283598	0.000155001770446212	0.000183840474654909	0.000155859884786584	0.000201857729324394	0.00015254499069377	0.000166621446886194	0.000151906027425918	0.000121108135287998	0.000147274719374718
pos_1549	0.000367409891145014	0.000367570032899753	0.000492369989726271	0.000634031674178458	0.0006787652795462	0.000605351347258427	0.000754160362633074	0.000575665738729368	0.000615208377537651	0.00063395215042419	0.000527167251586901	0.000521891276911758
pos_1071	5.90089593573648e-05	6.82108549705032e-05	6.57869459843519e-05	6.67823083039699e-05	6.99545191003274e-05	7.14883622091864e-05	7.86101463131096e-05	7.53861434366368e-05	7.07145080791977e-05	6.90957967183923e-05	6.36604820308705e-05	7.1814292664596e-05
pos_1381	2.49349552505218e-05	3.63332145908761e-05	3.15883599279883e-05	4.9075064340246e-05	4.15491509500115e-05	4.86669122471633e-05	5.44700190339456e-05	4.55691760025956e-05	4.04423943027185e-05	4.95540982352512e-05	4.73268578129351e-05	4.9763153662264e-05
pos_996	2.51709961583501e-05	2.98400084409965e-05	2.65858342634618e-05	4.20850143521857e-05	3.58800184221811e-05	3.97255469237579e-05	4.66174089580093e-05	3.69918935214519e-05	3.27219931280479e-05	3.58159957218388e-05	3.67868619204118e-05	4.83479952436867e-05
pos_1170	0.000171956897011215	0.000224558725044886	0.000179020414986807	0.000213131043437795	0.000268892118271439	0.000230103276014475	0.000261846266401785	0.00024010197996104	0.000286387735323078	0.000199464139574081	0.000280856172480143	0.0002440726672036
pos_156	7.12811894446391e-06	8.30617995789254e-06	6.94861968769878e-06	7.84225425650422e-06	9.53107194706139e-06	8.4298782372866e-06	9.35614246585868e-06	8.42453412359562e-06	9.17053605149765e-06	8.36229886337797e-06	9.67793316730731e-06	9.52015685965688e-06
pos_1108	0.000221343588337577	0.000231350867734143	0.000252019133767807	0.00022194302997239	0.000325985651588932	0.000266960951232361	0.000301838242901421	0.000280242476367214	0.000319160919013412	0.000271753427785651	0.000310437504709171	0.000252808746057233
pos_308	1.34237647261533e-05	1.19689801242491e-05	2.60398686059775e-05	2.67101346313181e-05	6.71956663911386e-05	3.6676622408601e-05	4.83251669657219e-05	4.03579935895008e-05	5.83650105798033e-05	1.84207866384053e-05	7.50775250750602e-05	3.58913281546312e-05
pos_1218	0.0013244722464755	0.00101217075441263	0.00155186871121292	0.00186318225228101	0.00278587040486815	0.00211085677247863	0.00300522327453124	0.00263259129534245	0.00344519819936599	0.00157508736788115	0.0030907150975056	0.00326796412218832
pos_557	1.28571092725151e-05	1.69288432421304e-05	1.85240875951646e-05	1.81552438324705e-05	2.04347515421285e-05	1.79277822592251e-05	2.04731260451537e-05	1.92830153564602e-05	2.32711143578859e-05	1.58434546048919e-05	2.08175208145406e-05	1.91345009371772e-05
pos_761	1.62856703411973e-05	1.86079128745075e-05	1.8657056596267e-05	1.94072506385114e-05	2.2278779796538e-05	1.85231837658345e-05	2.07962879864502e-05	1.95617253907738e-05	2.33354610010693e-05	1.84646037175869e-05	2.08620706998788e-05	2.02403744705076e-05
pos_334	2.23497646473938e-06	2.63490844739216e-06	2.80573001630819e-06	2.9440334043896e-06	2.92280503450837e-06	2.96339360087566e-06	3.21128212595431e-06	2.87780817215461e-06	2.74229144746219e-06	2.52455387783001e-06	3.12159720854427e-06	2.77445202321873e-06
pos_914	3.19158835730115e-05	3.03292236461187e-05	3.88638131324079e-05	4.29880010000352e-05	6.52756054840604e-05	4.33757446811439e-05	5.33201792203514e-05	5.48423343993755e-05	4.23911897649794e-05	3.56325211832381e-05	4.83620586505823e-05	4.41836204322972e-05
pos_541	1.34332550549961e-05	1.39950753612867e-05	1.28585311774994e-05	1.74472223849911e-05	2.58220417372642e-05	1.85665756509579e-05	2.48048649218289e-05	2.34391058810825e-05	2.08067400881904e-05	1.29399049258107e-05	2.50699446705901e-05	2.25250897547846e-05
pos_719	9.06078980539471e-05	8.44258136324646e-05	8.17180890906108e-05	0.000126343866310212	0.000148308185600366	0.000108712958096133	0.000138233105272336	0.000128659578443184	0.000127414503905167	7.99481515159967e-05	0.000156202502844254	0.000114183940197999
pos_1041	3.05907624428032e-05	3.39704411351982e-05	4.15285105715499e-05	7.16130463190421e-05	0.000138254864072635	6.2424667479201e-05	0.000107731696437159	8.54059145037519e-05	8.37984759495923e-05	2.33067561681828e-05	0.000119758349790108	6.47272241650251e-05
pos_151	0.000756804250428318	0.000737862019337232	0.000800600685462132	0.000946509555845842	0.00133962676675956	0.000947656160026501	0.00117325082031878	0.00109488267053375	0.00104682494616254	0.000708624625387625	0.00126800868245409	0.0009566437225474
pos_2696	1.59194986978312e-05	1.88856104113249e-05	1.6249651743551e-05	1.84733693237962e-05	1.9285057284933e-05	1.74253910754013e-05	1.88034457030805e-05	1.76392235637214e-05	1.92990353575966e-05	1.87327412518787e-05	1.77878043034317e-05	1.73977583624714e-05
pos_1275	3.5920692379029e-05	4.27930356680697e-05	3.59764742905705e-05	3.91132912237082e-05	4.67374721615677e-05	3.9791922746997e-05	4.3733396624098e-05	4.23080115509129e-05	4.66502916904127e-05	4.01329259775033e-05	3.73658616619703e-05	4.15206411646782e-05
pos_2257	0.000125257746768255	0.000168697867280157	0.0001411184368571	0.000160460666555508	0.000191995153806432	0.000157865850868064	0.0001687558585968	0.000163033284500416	0.000196155302697874	0.000155801060668625	0.000149061157481297	0.000147923033282729
pos_24	4.31967143397912e-05	5.55166578276255e-05	4.98126572049303e-05	5.20064894876656e-05	5.81023453254669e-05	5.05983479018331e-05	5.44401940073126e-05	5.30476721333883e-05	5.37555088136287e-05	5.44208877616471e-05	5.05025760045397e-05	5.81091827695296e-05
pos_2729	3.04380755922652e-05	7.67265915600289e-05	4.13102967851202e-05	4.13224521537171e-05	6.28532038630696e-05	4.43468707931651e-05	5.84790194870374e-05	4.30403552245645e-05	6.42869828755269e-05	4.92579340219449e-05	5.05613062423678e-05	5.39081953037593e-05
pos_924	1.64121338508565e-05	2.2658781155292e-05	1.81938411203219e-05	2.53684090538052e-05	2.43192911942775e-05	2.11257504491426e-05	2.46217150191836e-05	2.2967932258891e-05	2.7332891291706e-05	1.81219926389653e-05	2.54051006166913e-05	2.72554835758122e-05
pos_1043	1.49528463334129e-05	1.85454321130782e-05	1.56724643899687e-05	1.94224810346297e-05	1.79207832897366e-05	1.6882398136324e-05	1.82507549532422e-05	1.72505345870155e-05	2.11531297895208e-05	1.75349572122101e-05	1.83700704777963e-05	1.97517120085228e-05
pos_1504	7.38949305335764e-05	9.79403143741926e-05	7.45802823787135e-05	9.55154004910622e-05	8.42063054668049e-05	8.5723039180781e-05	9.43247731020852e-05	8.36975832310842e-05	0.000102614174409837	7.87352046052687e-05	9.49905850998644e-05	9.20258778391244e-05
pos_1079	3.07946144923707e-05	4.01110645253076e-05	3.4857537630565e-05	4.44303844599318e-05	4.60028511024693e-05	4.21815937718274e-05	4.13993081395398e-05	4.33327653199249e-05	4.47438196116195e-05	4.13122601478002e-05	4.33888662074285e-05	3.95087610353954e-05
pos_345	0.000145857473839306	0.0001822105078544	0.000144784619610717	0.000186873391775777	0.000187472713355883	0.000160999498834943	0.000185355355368358	0.0001741445922964	0.000175042432681358	0.00016261476956602	0.000176865147061464	0.000176071738473985
pos_598	0.00850156447252206	0.0107434944177884	0.00810255098021482	0.0109018362293483	0.0114864891203429	0.00971843188194255	0.0114334469826326	0.0108143254782125	0.0107236478521243	0.00957360529454295	0.0111357150605334	0.0101966340860061
pos_26	8.05601787430062e-05	0.000111854623742039	9.6846366633406e-05	0.000112709696430345	0.000119372582178657	0.00010122605548856	0.000115589724544942	0.000111933445819291	0.000110911677821122	9.88079464156822e-05	0.000121965086681268	0.000111309151659614
pos_325	7.04251548292102e-05	9.6205268211153e-05	8.67346625380842e-05	0.000100412109498915	0.000107425798164475	9.13360289229461e-05	0.000101063802886481	9.39987381566299e-05	0.000102251786349887	8.65818600110105e-05	9.95639776914305e-05	0.000102828570590378
pos_41	0.000112494772211575	0.000153453425111674	0.000137174767422085	0.000145655530981278	0.000170744924090231	0.000141794370257374	0.000164346160346335	0.000147676825406493	0.000161063888435716	0.00013827903225168	0.000159889250167952	0.000164383120665388
pos_142	0.000260933917392523	0.000316028710731955	0.000232463031851669	0.000286142502239049	0.000271853485133268	0.000265509146408973	0.000298372154618967	0.000268102298470207	0.000280656893341279	0.000294922222505039	0.000330874953366578	0.00028395320253425
pos_442	0.000400409869188798	0.000483571243585896	0.000349872511537846	0.000428908726277122	0.00041251613198391	0.000396748150176267	0.000442173229253597	0.000391694182180531	0.000421150382632066	0.000467158551632116	0.000494370405504	0.000439717389023541
pos_2463	1.62355721941313e-05	2.15709364261615e-05	1.59572856815974e-05	1.8475269088663e-05	1.86170726805081e-05	1.79573335869918e-05	2.00984297787559e-05	1.60418037414261e-05	1.9278150353792e-05	1.81264812400351e-05	2.30000771529874e-05	2.00386722930214e-05
pos_2791	1.03192884097109e-05	1.31905921142635e-05	9.51949515636633e-06	1.17605148813355e-05	1.14376651402226e-05	9.49893039184832e-06	1.20951143120128e-05	9.99379477331988e-06	1.15681358593212e-05	1.07316361151993e-05	1.2854001139997e-05	1.14933973180876e-05
pos_617	6.17368910211235e-06	1.44438012345838e-05	3.7408912369518e-06	7.69051446942671e-06	6.73081959441149e-06	5.9742591590044e-06	6.89622129974083e-06	8.61073726235646e-06	8.31000237650506e-06	8.55780754380661e-06	1.05471702432159e-05	1.4351855802264e-05
pos_515	3.21471521335448e-05	4.14125893891365e-05	2.57101309351492e-05	3.45100413344938e-05	3.53190078490993e-05	3.42475855962747e-05	3.98628153266783e-05	3.73235767332199e-05	3.61582461159093e-05	3.46745115368613e-05	3.9103855742548e-05	4.66164981179393e-05
pos_466	5.87562593623579e-05	9.31302089581699e-05	5.73197498565965e-05	7.19687314811584e-05	7.84952738426552e-05	7.2347538622297e-05	8.28918957137695e-05	8.05464128130077e-05	7.64071747776017e-05	7.5562106673768e-05	8.06587760214579e-05	9.05154957556293e-05
pos_619	3.76639356073162e-05	6.11932964949795e-05	3.37663488435036e-05	4.71130441486621e-05	5.16414404340508e-05	4.65048094892232e-05	5.21255418402809e-05	5.28866724771312e-05	4.92734079159614e-05	5.15793346350112e-05	5.4618751234678e-05	5.72672031979061e-05
pos_2093	0.00131060892496729	0.00189648858357202	0.00143463861738714	0.00148346704073128	0.00142499970112095	0.00171928356890993	0.00180756736793717	0.00168568593315237	0.00202014353332275	0.00152537652968184	0.00217268504703627	0.00209471667173539
pos_1231	0.000220156950249646	0.000398043036262886	0.00025290209752821	0.000294081695065719	0.000268364909778666	0.000330516098883709	0.000321418311142168	0.000326569134706138	0.000386962631947701	0.000320091196143625	0.000416473022537625	0.000378037478442783
pos_267	3.52006158895164e-05	5.23335311828754e-05	3.98196006621955e-05	4.266227443159e-05	4.04303814118328e-05	4.45723839842207e-05	4.56021542867809e-05	4.39863886420075e-05	4.91537432778951e-05	4.37950832166438e-05	5.30412003122594e-05	4.90105745935216e-05
pos_1981	4.58746306146212e-05	5.38257729815847e-05	4.37801097682763e-05	4.80138247789009e-05	5.0509980159021e-05	5.17208374215431e-05	5.35642257376413e-05	5.43139061237886e-05	5.67027677966866e-05	5.21519349749362e-05	5.81808382274859e-05	5.48546619694256e-05
pos_2348	5.29817859063337e-05	6.35563913414633e-05	4.77140389908234e-05	5.49379714412444e-05	5.5663964809694e-05	6.46609502505191e-05	6.53239600145263e-05	6.29150715876442e-05	6.92578729147482e-05	5.54454539291349e-05	6.66409090499753e-05	6.34952142772898e-05
pos_2372	6.02138340026811e-05	7.36079469649114e-05	5.19160421464917e-05	5.78122819697776e-05	6.29897201124529e-05	7.12149028151023e-05	7.67588151466174e-05	7.39209640944951e-05	7.70775634276424e-05	6.8959703180926e-05	7.53457208768264e-05	6.95555525561897e-05
pos_1699	4.82372108923713e-06	5.83657858443786e-06	3.85507325871418e-06	4.98981822245919e-06	4.97105775785184e-06	5.17780222293154e-06	4.94200981260805e-06	4.85600069373712e-06	5.67058722298253e-06	3.99839978333265e-06	5.188186654822e-06	5.46165321853888e-06
pos_2528	0.000128251730232898	0.000163460220814854	8.31364848856954e-05	0.00010181704779579	0.000128310052099191	0.000132570158119979	0.000154664632676384	0.000118759010680975	0.000133165855758902	0.000120247162978059	0.000160118379341609	0.000124073557922427
pos_317	1.64932354087099e-05	2.33889033659177e-05	1.19346401654263e-05	1.34153207077493e-05	1.75973793581748e-05	1.80685799760925e-05	1.83381519265846e-05	1.51845975498153e-05	1.84031061144171e-05	1.64593435362383e-05	1.87448531565871e-05	1.80157746261369e-05
pos_1411	0.000281282565115092	0.000317042029006708	0.000256934178059219	0.000287184828049044	0.000285782633120436	0.000291235701865309	0.000303737549476096	0.000298838582123826	0.000310218203202648	0.00029386581841357	0.000299938339572597	0.00029298945854252
pos_2745	4.57254507925384e-06	1.46216777216542e-05	7.33513697698633e-07	4.40873426862649e-06	4.68948695429971e-06	7.59178387050274e-06	1.20936344702148e-05	8.17335297218632e-06	1.13817966989591e-05	7.40985476435832e-06	9.32893476585051e-06	6.66372956013287e-06
pos_366	7.13707474293769e-05	8.43704696617057e-05	5.60442041496291e-05	6.92247866266137e-05	7.4559508365506e-05	7.3305132874084e-05	7.77005708706332e-05	7.17574968692968e-05	8.70053695009088e-05	6.66762246987091e-05	7.81552965825958e-05	6.90764638969861e-05
pos_547	0.00886883353303315	0.0111098068917875	0.00752858544628034	0.00903773483624899	0.0091787763554891	0.0095953778106684	0.00975290798003879	0.00953637383186072	0.0103957822695137	0.00935961683548275	0.0103162633031531	0.00897298301039949
pos_1489	0.00313916288651984	0.00398619985902129	0.00268540416122214	0.00332229943091989	0.00345418569943483	0.0034613337414954	0.00370945203799495	0.00358739068883766	0.00403161052308723	0.00338335997333663	0.00381742394952307	0.00331794793294372
pos_461	0.000328276060687588	0.000409741390369279	0.000286783872001675	0.000342197437491278	0.00035581756539463	0.000355072952528103	0.00036963395029661	0.000351344676640583	0.00039479199285123	0.000334228553819982	0.000379287756679411	0.000336420185146016
pos_2246	2.90558525957952e-05	3.42277701670884e-05	2.71896491631735e-05	2.82004489956726e-05	3.10492811390759e-05	3.36128770689585e-05	3.4615167732066e-05	2.93867553547869e-05	2.89745443963513e-05	3.75903379919985e-05	3.58731500555858e-05	3.14536296205732e-05
pos_56	1.81674078173458e-05	6.49330992293098e-05	1.45691951121943e-05	2.0858604882951e-05	3.56433603019867e-05	3.09910180769802e-05	7.36963039230452e-05	6.37609808981355e-05	1.63518528248773e-05	0.000188433838062614	0.000105101324916849	3.65934938199054e-05
pos_1224	5.27584751086724e-05	8.67553092461363e-05	5.49310325729846e-05	6.49422172520781e-05	5.08409899363779e-05	8.03897269121016e-05	0.000259250259446479	0.000124165948086115	5.33862509010606e-05	0.000253270141258379	0.000179171679732794	8.06833479466078e-05
pos_27	0.000122831587835226	0.000383195288763028	0.000113090662344688	0.000229135172321272	2.21728175291721e-05	0.000494362204270199	0.00278271185820675	0.00105170988278017	3.60232992284665e-05	0.00267992519946483	0.00184490460957996	0.000499242554222661
pos_2509	0	1.31441136713916e-06	1.17985972032071e-07	2.01313021091912e-07	0	2.02927189226777e-06	1.01449383211653e-05	5.87336288597306e-06	0	1.58074185741961e-05	1.1660647479767e-05	2.76419978001768e-06
pos_934	9.18011149359585e-08	7.80322732376474e-07	8.02311615709173e-08	4.39784538157966e-07	0	1.5141603008525e-06	5.35921590122039e-06	2.77350675478615e-06	0	8.22656271814225e-06	5.25929233061498e-06	2.27522175263118e-06
pos_218	8.76360013864739e-05	0.000103551976745287	9.44952556292891e-05	8.91871727826089e-05	0.000104893892937612	0.000118793088518968	0.00011162184326099	0.000114933372714312	0.000117641511081396	0.000121100324874012	0.000110778711684949	8.78973076126596e-05
pos_904	0.000765875719930546	0.000904028931063944	0.000894773651297901	0.000855617733490801	0.000913365803430154	0.00108742381628677	0.00100331368959255	0.00101405367806858	0.0010695968398845	0.00104312437587447	0.00107781562531022	0.000894807240777894
pos_1493	5.75915108150401e-05	6.01099723321237e-05	5.23096092752831e-05	5.42999132754483e-05	6.286621172343e-05	5.91662032177553e-05	6.6248303263982e-05	6.46750009206818e-05	6.00545821926813e-05	6.08126089556001e-05	6.12099790902772e-05	5.13654670270111e-05
pos_45	0.00177635218439728	0.00231342980422474	0.00180852252867085	0.00178960885344882	0.0022973879528943	0.00258263446158069	0.0028609218100813	0.00239876131005013	0.00228670680836158	0.00249522330614528	0.00215932860159392	0.00197289877717803
pos_141	2.7315854878403e-05	3.0896373119871e-05	2.64641948937256e-05	2.7568468786667e-05	2.90485952422033e-05	3.0802103605661e-05	2.99687639523779e-05	2.94910524081698e-05	2.76599478468852e-05	3.03876586517139e-05	2.8780594031392e-05	2.54741952418978e-05
pos_453	0.0012504137406963	0.00151198633809553	0.00107155654371662	0.00117093822639348	0.00138015676964758	0.00139895088972454	0.00133527855635631	0.0012468417966044	0.00120488535241767	0.00136783555242157	0.0013414405778016	0.00118628016441468
pos_944	0.00053877210111778	0.000678313727690027	0.000431722473491646	0.000517633823627261	0.000531483832573401	0.000591278286473064	0.0005774251875183	0.000542078720696545	0.000461812226769569	0.00063362741787435	0.000626996380475382	0.000491243704631384
pos_359	0.00105217471739811	0.001815686909577	0.000993835592857582	0.00136597356698271	0.00150596573089052	0.00154165127522092	0.00158996704053635	0.00141359728228875	0.00110241936276682	0.00108860246286355	0.00155849149964898	0.00124192943164303
pos_940	6.56776684593414e-06	1.22283368403448e-05	7.58076839244989e-06	8.05898902337817e-06	1.09259959483694e-05	8.53032696251064e-06	1.08449949094875e-05	1.02725567586011e-05	8.11687325393759e-06	1.06729892699224e-05	1.2890220396184e-05	9.65758343238095e-06
pos_1598	6.05416001138834e-06	1.13090867963499e-05	6.5219052401703e-06	8.02808948476939e-06	8.58831762322314e-06	7.97527382157739e-06	8.75559483236435e-06	8.56899349422263e-06	7.97982561162873e-06	9.19343091892664e-06	1.14109998629875e-05	7.10598469224083e-06
pos_265	1.84498451604234e-05	2.8621620908817e-05	2.06890096239768e-05	2.23156864107094e-05	2.24907344500729e-05	2.3500865631922e-05	2.2686042603043e-05	2.45016436942106e-05	2.13823366129655e-05	2.38935197209312e-05	2.80192440503271e-05	2.27434959616266e-05
pos_451	0.000113392663591567	0.000126593872037827	8.49884385123665e-05	0.000122254815590237	9.21111966039418e-05	0.000141057588427873	0.000148217910393749	0.000139871573392112	0.000154080161163572	0.000134155960205709	0.000141559597749296	0.000120604653418341
pos_748	8.60628576342801e-05	0.000108693037643085	7.68287554777533e-05	0.000101437388653796	7.55308773363374e-05	0.000109225006011129	0.000100609368906932	0.000101994040973962	0.000104222793909324	9.97181680762889e-05	0.000109689835420493	9.75647443098808e-05
pos_1301	3.20517760485464e-05	4.17087549303255e-05	3.05843560319044e-05	4.07814627549097e-05	3.356548323395e-05	4.56051805142697e-05	4.0912149073291e-05	4.04359524062511e-05	3.5340788118126e-05	4.57232198446704e-05	4.20472383059359e-05	3.64230470370473e-05
pos_2179	5.27306455167551e-06	1.25710148448618e-05	4.66742070742138e-06	8.50169575050714e-06	5.54497888659997e-06	1.11874362998736e-05	8.42042308498331e-06	1.08513290758264e-05	8.55857561109726e-06	1.15194108827889e-05	9.8911000301095e-06	8.37808647774259e-06
pos_694	0.000132696397337558	0.000174922042980962	0.000134494614545836	0.000148720493002874	0.000147847086864062	0.0001926896712056	0.000179046648638278	0.000180925537586967	0.000160204388818688	0.000165159842978206	0.000164365411336634	0.000150176175556809
pos_1851	0.000132822540850954	0.000148270299055897	0.000124382819968874	0.000130415001790724	0.000129999555720575	0.000157924283989786	0.000148144097950403	0.000144258234959912	0.000144231827536965	0.000153008966162701	0.000147156947091601	0.000140479249979975
pos_2321	1.74098899714332e-05	2.91198388397907e-05	1.51845100328356e-05	1.91298085356766e-05	1.83710452020822e-05	3.03666054377073e-05	2.69232673468737e-05	2.46839481200146e-05	2.72295118665325e-05	2.81647203619472e-05	3.02109878548469e-05	2.03644526115958e-05
pos_750	8.17939791036655e-06	2.16535416219702e-05	7.71721677644854e-06	7.8504404206243e-06	9.30822240727083e-06	1.24347141426282e-05	2.34928263076072e-05	1.21382583430125e-05	1.80425909321288e-05	1.82985699337819e-05	1.92072932618386e-05	9.85939366686954e-06
pos_1336	1.10143275689103e-05	2.31595750292418e-05	9.41871854216108e-06	1.58074107108644e-05	1.69415846838409e-05	1.94859342056183e-05	2.95510901394166e-05	1.52973067358869e-05	2.09439965449765e-05	1.60516246212235e-05	2.14060042750917e-05	1.84286882994678e-05
pos_195	4.89671071181358e-05	0.000108878453967328	6.17377871256416e-05	6.25960347649567e-05	6.16979989755248e-05	6.68315939332568e-05	0.000113942311801838	7.20834316047353e-05	6.83106216193696e-05	7.76578505192973e-05	9.0170640961469e-05	7.42455107914801e-05
pos_2411	1.98373909264664e-05	2.9936141154856e-05	1.72474043849342e-05	2.25649187508779e-05	2.06179067568542e-05	2.16457810227971e-05	3.03049357021501e-05	2.4982428830539e-05	2.31684338613619e-05	2.47135316597702e-05	2.43007499445076e-05	2.40903830548644e-05
pos_521	4.71432293465448e-05	5.78368323115043e-05	4.50138579107675e-05	5.26701878855522e-05	4.76119706100821e-05	5.01317311945755e-05	5.33605004091318e-05	5.219075464152e-05	5.32209878454788e-05	5.35417219213715e-05	5.50399749104526e-05	4.84851677814914e-05
pos_1117	7.99613042420407e-05	9.84664924173189e-05	7.39020915505291e-05	9.34448069613459e-05	8.46350356818322e-05	8.52521423628869e-05	9.02908432093084e-05	8.90519554028468e-05	8.73042741896484e-05	9.20981677883024e-05	9.02332922295829e-05	8.32993539662929e-05
pos_168	0.000190550640218208	0.000231419459599165	0.000175384271417748	0.000207701953229701	0.000192038250146887	0.000194272306153621	0.000209294504265113	0.000202528157514259	0.000207725557289141	0.000205525193680461	0.00020434724361837	0.000193445442489469
pos_757	0.000381501335123079	0.000486708828581618	0.000364276829362577	0.000446891414490225	0.000415214509823547	0.000417450709673149	0.000472423390436895	0.000445178971958666	0.000433394377766383	0.000411328712997253	0.000457338862552796	0.000448107886544816
pos_119	0.000172409947216234	0.000218346483538432	0.000166700000050388	0.000205295982412063	0.000182252058374789	0.000191979470120804	0.000209132322269042	0.000203765423415896	0.000205149213162387	0.000189263163250823	0.000213456325755737	0.000214618573468933
pos_470	5.20185143667817e-05	6.47152244100661e-05	4.92493786710409e-05	5.8434974215406e-05	5.42642697473633e-05	5.47507263378828e-05	6.14170010093586e-05	5.93590889212236e-05	5.96780662126449e-05	5.66684780406346e-05	6.22889130748565e-05	6.18554716159023e-05
pos_76	8.8771364516558e-05	0.00010886168480892	8.22167807143936e-05	0.000100723774290722	9.37164412332399e-05	9.63441786505119e-05	0.000105101771009337	0.000104830776384259	0.000100247657166886	9.60275989406485e-05	0.000108421229560751	9.3916190185865e-05
pos_186	0.000249903670483553	0.0003291033527194	0.000234287594227188	0.000285103163744463	0.000251248727081232	0.000272871991009683	0.000293123479153476	0.000291257094476047	0.0002672664616519	0.000266099786300316	0.000316805583261269	0.000273925889420618
pos_210	8.02208348794139e-05	0.000102993997755757	7.24482362329555e-05	9.14889226568088e-05	8.00315679587757e-05	8.61201795235919e-05	9.20796513253512e-05	8.84931826605737e-05	8.67029786248027e-05	8.44789359277244e-05	0.000102107087400342	8.71845979372555e-05
pos_1304	8.27538699079665e-05	9.82526541448008e-05	8.07370970899906e-05	9.70911994352748e-05	8.56199298465793e-05	8.94933208072982e-05	9.44291549689873e-05	9.41664173183019e-05	9.45787698874181e-05	9.51883621521759e-05	0.000104456262470658	8.86065612991397e-05
pos_233	0.000205387194893177	0.000246723276630994	0.000182497153153431	0.000224951045274426	0.00019567839787246	0.000212589729925899	0.000244932411064279	0.000225329802307909	0.000217168087287404	0.000230553298253078	0.000253646940421986	0.00021269506507874
pos_1895	9.20638121374917e-07	1.77092920985009e-06	1.36859838490032e-06	1.96196238791097e-06	2.19373599677917e-06	2.3345174884994e-06	2.06263854088426e-06	2.65850130128806e-06	1.80472277674227e-06	2.09121532420964e-06	4.29691165464405e-06	1.48358111761689e-06
pos_1837	8.66413325229808e-06	1.22270326948571e-05	8.0594063418319e-06	1.10691972615474e-05	1.18259017482657e-05	1.18846850857517e-05	1.10751447789398e-05	1.29367669447655e-05	1.03157062605716e-05	1.19616374908309e-05	1.71316835786575e-05	9.3077401090876e-06
pos_990	1.09512752503749e-05	1.52541125220512e-05	9.98582414824242e-06	1.53337567489313e-05	1.45169302246077e-05	1.46497249678033e-05	1.51471046176083e-05	1.6671761889035e-05	1.37433312008812e-05	1.59251649458174e-05	2.54986121290955e-05	1.25435984805839e-05
pos_727	5.68776200170399e-06	6.70622114505193e-06	4.37174501601308e-06	7.23970142251501e-06	6.23127219493106e-06	7.06913129113044e-06	7.12842858957429e-06	6.92063622399984e-06	6.66064121318833e-06	6.69150050774805e-06	9.08181617920631e-06	5.76886068917702e-06
pos_1184	1.13147678862185e-05	1.57748100882483e-05	9.11228236566148e-06	1.50589009258112e-05	1.52227353247831e-05	1.59259234009478e-05	1.37694732615305e-05	1.55297888975934e-05	1.53043780059665e-05	1.53986802890716e-05	2.04048680462709e-05	1.35170953551426e-05
pos_2286	2.33979822661598e-05	3.22918320078475e-05	1.97570340419361e-05	3.04881137009767e-05	2.92529217269304e-05	3.19575668539953e-05	2.86551860942139e-05	3.12977016911731e-05	3.02183448562528e-05	3.35713849346409e-05	4.03792545574528e-05	2.64487534070901e-05
pos_989	1.15540709083112e-05	1.72348596413917e-05	9.29736592217916e-06	1.6275945835555e-05	1.61169128254502e-05	1.68469171452889e-05	1.49654237648919e-05	1.7340248502863e-05	1.60557441917882e-05	1.78080521540163e-05	2.37323318326776e-05	1.44089312316889e-05
pos_2313	5.49940246887385e-05	8.19852724469025e-05	4.24856213015472e-05	7.0627289508526e-05	6.67002633117546e-05	7.65662460066032e-05	7.28677979814315e-05	8.16442497904375e-05	7.2237584317503e-05	9.19043576447341e-05	0.000123986614636118	6.2529677745883e-05
pos_2623	2.88028209258431e-05	4.18844063703111e-05	2.10422733063127e-05	3.66137216362605e-05	3.43711433889431e-05	4.55713415067171e-05	3.74434951532265e-05	4.50933348634262e-05	3.5607667955433e-05	4.74269460176737e-05	7.16193214234321e-05	3.48417321583212e-05
pos_275	7.40827571651746e-06	1.10287890028008e-05	5.6212701434774e-06	1.02420027877675e-05	8.80509665954345e-06	9.1466485766146e-06	8.55621162354733e-06	1.02457544908686e-05	9.16815067362895e-06	1.05628334712507e-05	1.52129243003989e-05	9.08686862403572e-06
pos_2813	1.64757572448517e-05	2.49021109207883e-05	1.39822202823169e-05	2.02910969015449e-05	2.14542190760907e-05	2.01503113751361e-05	2.06457977291222e-05	2.49665388939515e-05	1.95239781394769e-05	2.32143009974573e-05	3.11641571751395e-05	2.00233533636552e-05
pos_298	1.4294642826203e-05	2.02929370339018e-05	7.47192975115064e-06	1.58661235905848e-05	1.29378606719633e-05	1.56580705575613e-05	1.70513839676952e-05	1.9858949953125e-05	1.37807434151741e-05	1.59567754304482e-05	3.8009424427953e-05	1.24247491123733e-05
pos_2138	0.000250793461694152	0.000311793792650228	0.000174793569936756	0.000214098451603201	0.000217740911660793	0.000267554761993063	0.000303050573443221	0.000293160235133446	0.000289459182433455	0.000261236523095483	0.000458700131231928	0.000246632857759152
pos_390	0.000465477234250507	0.000656090586109973	0.000351649860094421	0.000487766909669712	0.000501470797621015	0.000513921655224452	0.000603679800352167	0.000603436790969024	0.000544071619128942	0.000592412330820539	0.000866519560155979	0.000436830785930701
pos_2341	0.00110885765190872	0.00150738587914478	0.00102296279860815	0.00113123515050266	0.00114489808181324	0.00146330117127722	0.00154091988244958	0.0014992135052734	0.00157648751227705	0.00142426237086143	0.00213941310909843	0.00127076975131841
pos_894	8.87042432384244e-05	0.00012082297763198	8.75334182025512e-05	9.77157290579291e-05	9.94581784233183e-05	0.000124113865100561	0.00012585101245769	0.000127059391242989	0.000125030327686337	0.000125485593765059	0.000159545689491481	0.00010686518102616
pos_770	4.23297519645428e-05	5.75983713997858e-05	4.30562798124434e-05	4.6256062263402e-05	4.35091725783677e-05	5.09608739078674e-05	4.97659892315111e-05	4.86028951776953e-05	5.12808713693742e-05	5.18400663383476e-05	6.32716732765444e-05	5.2597779469957e-05
pos_1408	0.000318633126348585	0.000416452668446025	0.000307323035793485	0.000322871504174112	0.00033250011599045	0.000362414567739016	0.000404156794748062	0.000392113260425972	0.000392698300311282	0.000429616260718163	0.000537908005592419	0.000387928911270317
pos_260	0.000297408497618493	0.000381431476182294	0.00024822024055482	0.000286012233541594	0.000293863658274156	0.000293324075869217	0.000347588836574223	0.000322178726726634	0.000347717391232166	0.000347924239561906	0.000467838172688707	0.000336743175244021
pos_832	0.000152466373969504	0.000195731153382122	0.000129421147398168	0.000128518652488131	0.000136939623605528	0.000148713655660928	0.000172625683617628	0.00016915934895999	0.000188349784230865	0.000173798066068194	0.000267487542675061	0.00016885383092206
pos_559	2.44887725280841e-06	5.24754643057889e-06	2.13142229986111e-06	1.06653543644505e-06	4.96256149565593e-06	4.76163902366883e-06	4.15275917028204e-06	5.16777411883044e-06	2.34547107441732e-06	6.43331700095926e-06	1.26041870326795e-05	6.595763378285e-06
pos_1054	5.69997995278618e-05	7.47177204875475e-05	4.04167306961233e-05	7.60027141821194e-05	3.84132371728819e-05	6.02313836532509e-05	6.47861547949556e-05	6.4313804244299e-05	4.26122010928391e-05	8.04637621646833e-05	0.000124096641775704	9.6351813876898e-05
pos_2659	1.6687942304752e-05	1.87695587066218e-05	1.39241951684861e-05	1.71335967817895e-05	1.73517416758225e-05	1.69953251955841e-05	1.98068937407565e-05	1.70378060212764e-05	1.57448194719578e-05	1.80986052173335e-05	2.2890088471515e-05	2.02052921865816e-05
pos_2739	7.41472452880871e-06	1.05059080241903e-05	7.38546449245958e-06	7.86258924474188e-06	8.42208252506972e-06	7.79804650609572e-06	9.45062702815506e-06	9.70129618172322e-06	9.04274660167013e-06	9.93672248668454e-06	1.06514462848218e-05	9.89993646302495e-06
pos_1831	3.2649805806983e-06	5.03352416599201e-06	1.86191362072863e-06	2.77886957619795e-06	3.29015414159718e-06	3.50011161257519e-06	4.19888271682618e-06	4.41515252952794e-06	3.89157064663828e-06	4.63786592189737e-06	5.23068747360298e-06	3.97283302105025e-06
pos_988	6.30558694777471e-06	7.90502348592751e-06	5.25389751769173e-06	5.51662109539408e-06	6.37709497854613e-06	6.58081226638962e-06	8.02856859242262e-06	8.1809130762295e-06	6.79695573201972e-06	8.84914772284032e-06	9.88349828224998e-06	7.59789681664675e-06
pos_2107	1.5684807639826e-06	3.50562223760737e-06	2.21029941940599e-06	2.84386517101532e-06	3.45428516558793e-06	2.37015746390358e-06	3.71596887746404e-06	3.13408924028431e-06	3.48467233436344e-06	4.41526373792849e-06	4.72855189930164e-06	4.34528466246455e-06
pos_2541	2.96803544198392e-05	3.74311305118157e-05	2.62182214791165e-05	3.47031492655254e-05	3.59450337178528e-05	3.15799992975341e-05	3.89333154294411e-05	3.94323080978663e-05	3.20214713430757e-05	4.31418394881663e-05	4.3293856610723e-05	3.95586378289077e-05
pos_1527	0.00048348993384729	0.000593097460802505	0.000418652037190582	0.00087342472016851	0.00067302857144053	0.000698672639808911	0.000882091723524844	0.000865649591469124	0.000790306756348946	0.000632016229680207	0.00122712310114696	0.00124315097052743
pos_272	5.11542111239528e-05	6.33850608646717e-05	4.78709911534714e-05	8.61906263899058e-05	7.11602132212011e-05	7.09290528405119e-05	8.48746960293324e-05	8.48333744691942e-05	8.17531334772085e-05	5.83816826724365e-05	0.00010824666052773	0.000122233822325827
pos_1394	0.000139457250575324	0.000174247360561005	0.000135111627790851	0.000205555001519346	0.000176575498449584	0.000187588088624909	0.000211171561531781	0.000208075670080589	0.000254274820689011	0.000167055006041947	0.000270380805770083	0.000269680744839691
pos_243	0.000485462565869364	0.000566610455487053	0.000526413541976121	0.000825520276984083	0.000688930415175148	0.000740982643095331	0.000856388102264118	0.000798596003332935	0.00090789562621235	0.000543053188925919	0.00134564403757729	0.00115122667359338
pos_1230	0.000544332669163716	0.00048888523869062	0.000731794950336345	0.000679472192115623	0.000807697844768544	0.000711933429856529	0.000955490214295763	0.00075435746246056	0.000833169182637674	0.000495654859072989	0.00123449028547808	0.0011473890281302
pos_2231	0	0	0	0	4.32437968330666e-06	3.12314427654278e-06	3.82681556413491e-06	3.91217387464809e-06	3.33964574397402e-06	0	1.10666648592802e-05	6.99970792839155e-06
pos_314	4.13567734242507e-06	9.04739802051969e-06	6.66812896837766e-06	8.05590245875916e-06	1.94668884604236e-05	1.9293873757925e-05	2.57464522759875e-05	2.13980578178222e-05	1.73240910821814e-05	4.54515535651958e-06	4.79636226524331e-05	3.87809416480239e-05
pos_229	1.83461499238835e-05	2.3904700977618e-05	2.26481723978056e-05	1.99911309115207e-05	2.10363688794316e-05	2.54590390492624e-05	2.52686037957727e-05	2.31493730239486e-05	2.83512192549827e-05	2.16752654901423e-05	2.87105994439566e-05	2.90770254515131e-05
pos_188	5.02243212753483e-05	8.57321255893612e-05	8.1872590999019e-05	6.45535509640268e-05	6.50443652376988e-05	9.26379843735886e-05	8.81511729233323e-05	8.04772941601401e-05	0.000113169510207808	7.21410860377687e-05	0.000128866015966484	0.000109711442949573
pos_595	2.222921192298e-05	4.1049680437184e-05	4.05051960328473e-05	2.81662678672743e-05	3.33333556861879e-05	4.89902362926552e-05	4.46771564885139e-05	3.75734241320966e-05	6.11872918188289e-05	2.97517112509271e-05	7.15503023652677e-05	5.71701201444546e-05
pos_1056	4.11006374474745e-06	5.877128266319e-06	4.73002107837413e-06	4.77756741257408e-06	3.8921768737568e-06	5.06780022314919e-06	5.4961929984789e-06	5.32383788010287e-06	5.90479668295649e-06	4.87142827350352e-06	7.27122116521195e-06	6.96429706786519e-06
pos_1640	0.000156550109802598	0.000209425324660752	0.000189179369953509	0.000180771522158723	0.000158548691953624	0.000208651292711416	0.00021570604149642	0.000203911723894399	0.000216368092922744	0.00020780409084531	0.000265044962585841	0.000263020881431366
pos_1190	9.57324346709939e-05	0.000133461397572635	0.000108525518552379	0.000106423070163992	0.000103005353129861	0.000152496727479017	0.000144251672416413	0.000138590192841285	0.000166142525401075	0.000108879503595463	0.000193619274485094	0.000216237920605999
pos_283	2.63286761178948e-06	6.91573875986977e-06	4.73762516991841e-06	3.9461042756494e-06	4.79776039593688e-06	8.08244248973827e-06	7.52745548978734e-06	7.00352898846965e-06	1.04090641326352e-05	3.11865580436463e-06	1.19961934734002e-05	1.55209983423398e-05
pos_2105	5.12441255337323e-06	6.93910509788228e-06	5.93501507161674e-06	5.56525618751044e-06	5.17959322960541e-06	6.91197187156719e-06	7.2790473883206e-06	6.66375880232517e-06	8.1067883665382e-06	5.96266345633417e-06	9.38376228619089e-06	9.62231548102716e-06
pos_799	1.8979968658301e-06	2.86704723557212e-06	2.18223508355408e-06	2.24113230274494e-06	2.00000517282158e-06	2.78329922492643e-06	3.17852739502151e-06	2.70471291020569e-06	3.22793255259153e-06	2.21799361988241e-06	4.17704110088075e-06	4.71319830807031e-06
pos_1556	5.68570358288097e-05	7.55204542455022e-05	6.13776549197161e-05	6.63898068995419e-05	5.96237272303631e-05	8.13009142468758e-05	9.37503697112992e-05	8.1408704376118e-05	9.10867910581932e-05	6.36823545681576e-05	0.000112858389423605	0.00012709794059251
pos_192	3.98174131875597e-05	5.58109192592473e-05	4.83477493303108e-05	4.5495419060149e-05	4.41148936112086e-05	6.30000878513963e-05	7.00310179265976e-05	6.46040828687306e-05	7.52896012683023e-05	4.58701072525676e-05	9.30065714280904e-05	0.00010850939742781
pos_2766	3.17072854242329e-06	4.49583115942195e-06	2.86936513751557e-06	3.74744250251531e-06	4.30140293599615e-06	4.24252245964469e-06	3.78604308488437e-06	4.58493243158321e-06	5.44201536588405e-06	3.26271169515821e-06	6.87366637135611e-06	5.12046216294495e-06
pos_1163	4.0330391202795e-05	4.57508328991549e-05	4.50187907730334e-05	4.32354813197675e-05	4.85884477477697e-05	5.34900303905838e-05	5.37409279564555e-05	5.21823273738139e-05	6.24256012837863e-05	4.76990073017062e-05	7.09559302630991e-05	5.99287901637545e-05
pos_2004	9.80379925761199e-05	0.000118843400392729	0.000103535615260466	0.000104795933190213	0.000106242375795874	0.000121173161142331	0.000120828178476967	0.000118757765815883	0.000134967961525862	0.000117667371176968	0.000150213975642815	0.000126347780384516
pos_1412	6.33368410011311e-05	7.32880846793761e-05	6.37478113824632e-05	5.15622318717536e-05	5.07831606335262e-05	0.000102731766646412	8.48761933690261e-05	8.61203090004835e-05	8.93346301373953e-05	6.4963332544345e-05	0.000306931813704299	0.000191627615490944
pos_570	2.66717754728916e-05	4.4801673949915e-05	3.217356653279e-05	3.54612023143156e-05	2.54398427255405e-05	5.53122805043279e-05	4.59440019373915e-05	4.70801752582846e-05	4.99395132994309e-05	2.90905162762114e-05	0.000109565589986337	5.29600667650057e-05
pos_1151	4.70068569405083e-06	6.53219214955791e-06	6.76348696763214e-06	6.84443891330851e-06	6.14750064857477e-06	6.59214754729847e-06	1.00631988580853e-05	6.81660772171375e-06	1.04757410864096e-05	5.83772009783282e-06	1.79883462074518e-05	9.91840365328589e-06
pos_788	0.000168127480883667	0.00019488696449303	0.000149347362083093	0.00011866809494542	0.000121467401026728	0.00022288814807394	0.000291245107470733	0.000189735628440158	0.000304855029293355	0.000176454848726816	0.000469789809187053	0.000373572391165496
pos_1817	1.40676863905235e-05	2.21521206751895e-05	1.16663428921606e-05	1.2919630997126e-05	3.00014578994418e-05	2.29299507863105e-05	3.10066145562298e-05	2.39867140172656e-05	1.68856597627503e-05	1.71223757155686e-05	4.38401597277128e-05	3.45785278214677e-05
pos_2572	1.67199395185248e-06	3.23591535638792e-06	9.1018936700864e-07	1.26169219431028e-06	9.59355729285779e-06	5.03579668445133e-06	9.36535116964775e-06	6.3394542439504e-06	2.23598351993206e-06	2.05041272615849e-06	1.34494236562553e-05	9.71883077543858e-06
pos_287	0.000264400463782323	0.000518449237712393	0.000242142284139392	0.00027281903983495	0.00127075494946957	0.000741646609703269	0.00120363476726186	0.000901659502714648	0.000387454523698877	0.000395872357684471	0.00208794794740726	0.0014879224805292
pos_2377	2.77915772823481e-05	3.83992449909033e-05	3.15632337839323e-05	3.5424905235057e-05	4.88533377318759e-05	3.78632705628757e-05	4.19861912940036e-05	3.92402251650082e-05	3.99519198308146e-05	3.33158465639292e-05	5.33779478891249e-05	4.28342974564714e-05
pos_765	1.75395297869792e-05	2.62767296586444e-05	2.24040689604143e-05	2.23918266725266e-05	6.47241364362209e-05	3.99402255496914e-05	4.99571932185246e-05	4.28192019508614e-05	3.41472023964784e-05	2.19228633854961e-05	8.53925793629469e-05	5.19100425654579e-05
pos_1058	2.11209365741551e-05	2.76998133988738e-05	2.78623617172906e-05	2.86097329984861e-05	9.95615975779274e-05	5.77249699886979e-05	7.90604604235603e-05	6.16331586940204e-05	4.82801954081291e-05	2.48689226720371e-05	0.000133949541380594	8.01655579499623e-05
pos_854	3.21155348395974e-06	3.73486335886597e-06	3.71414437693947e-06	4.13726648778644e-06	8.59928528778344e-06	5.59484065116475e-06	7.12087603234659e-06	6.12780775486902e-06	4.85223384475221e-06	3.36124025158839e-06	1.04997037696923e-05	7.20588326192703e-06
pos_1479	3.92895756361606e-06	5.30745971183094e-06	4.18228290751799e-06	6.36799650426316e-06	5.15154685150624e-06	5.89383479177933e-06	5.68996200318646e-06	8.55061376521766e-06	4.89706594009595e-06	5.01558432588958e-06	9.42881751523334e-06	6.65166644389425e-06
pos_1852	0.000348419551016475	0.000484160568568865	0.000354901179914772	0.000527364655848045	0.000398409710625293	0.000419755899958163	0.000441828083380145	0.000627066713707547	0.000286552803508835	0.000313350365621672	0.000749238937629108	0.000534674310649874
pos_1737	0.000148593398225745	0.000198570219984799	0.00017790927854759	0.000273486771842719	0.000205867906126906	0.000206813156144413	0.000223593568860273	0.0003120989552192	0.000126700998281548	0.000151475545421543	0.000357885212929226	0.000319114626249863
pos_2635	0.000735497689150831	0.000885037628982217	0.00078152828333015	0.00105828650129418	0.0008448629768549	0.000855200698303151	0.000957382232122152	0.00114055808405621	0.000701529123659018	0.000738767890515888	0.00124831077498261	0.00104620335622384
pos_1145	0.000102013880147647	0.000152492251334751	0.000181876562755282	0.000322449850516079	0.000220988191379428	0.000191998596943191	0.000236587057216014	0.000384371970696536	9.12910474417522e-05	0.000112738624568061	0.000407752578443822	0.000392483684688169
pos_1898	5.642284929301e-05	8.62067304939466e-05	0.000110763223856392	0.000198096920080098	0.000128641170721635	0.000122187301134695	0.000139986729184714	0.000233127377764849	4.70501638659576e-05	6.69299489325627e-05	0.000247896859520216	0.000263253589638172
pos_514	0.000325637365883268	0.000342214189364501	0.000340515083849131	0.000533946667816136	0.000468897314764264	0.00040867479061172	0.000536306742579799	0.000668653830991475	0.000359656032097035	0.00032768660070651	0.0006493702505471	0.000589777666522768
pos_1664	0.000178610305347425	0.000229343342415696	0.000281277035256201	0.000574161195527899	0.000394046732472684	0.000324300897435274	0.000447281254579183	0.000706408094896231	0.000139912419704229	0.000183684590320682	0.00074949462253572	0.000584689563430437
pos_1288	0.000298983448504834	0.000333160194702935	0.000339844487902542	0.000635647233470722	0.000459809636128674	0.000415954133962222	0.000533123964049495	0.000813868840427879	0.000237711639051813	0.000316922027553701	0.000922010839103759	0.000562744346580251
pos_1616	0.000352682469001256	0.000441885432569148	0.000473274608305006	0.000736191326838663	0.000530534624055912	0.000500635966465577	0.000607434605271728	0.000843134583448218	0.000320119474223815	0.000388106533103674	0.000927133460981403	0.000654212290703394
pos_1554	5.37432482965262e-05	3.91269092606239e-05	3.31518934462394e-05	7.30159072184593e-05	2.68664167226302e-05	5.9142154771679e-05	3.19356723328974e-05	4.77409933942625e-05	5.08065590441961e-05	4.10659339223321e-05	8.93817441365659e-05	4.36625081931601e-05
pos_2521	1.64792776355478e-05	6.33876359934369e-06	1.85791942614296e-05	2.23641089104321e-05	9.96515645313579e-06	1.80441570775684e-05	8.0942112799317e-06	1.68683011521122e-05	2.09730002819536e-05	1.88193671268594e-05	3.09629009138558e-05	2.00202539589416e-05
pos_751	1.12305506488488e-05	6.27499848243819e-06	1.38995608071833e-05	1.43856202790042e-05	4.8753813813226e-06	1.20373856182694e-05	5.8068648675021e-06	5.47093409050728e-06	1.27986577145982e-05	8.17887235609514e-06	2.30826334612597e-05	1.14318733269201e-05
pos_1388	0	0	1.69888160291032e-07	5.2066867750608e-06	0	0	2.09422619478384e-06	0	8.5901054589374e-07	0	4.9564236760293e-06	3.17906709192295e-06
pos_565	2.66003787523533e-06	3.09292007297056e-06	2.55133217314134e-06	1.6112387998935e-05	1.76609823712769e-06	3.21530953210135e-06	9.38034511102043e-06	3.24291714277067e-06	2.84359655805598e-06	2.29012330578879e-06	2.41233951626678e-05	1.42348739132397e-05
pos_610	3.17503139739636e-05	3.04766015372494e-05	3.2529107364157e-05	5.84088016599636e-05	2.08788984137851e-05	2.88123241006414e-05	3.19102364286509e-05	3.33782960631897e-05	3.22858757554075e-05	1.77275199740329e-05	5.41448335825821e-05	5.36564880266685e-05
pos_1186	1.00344915669112e-06	2.63674617260979e-06	1.30758658211719e-06	9.78752525127604e-06	2.94223909325942e-07	2.34725421440534e-06	2.38639173595499e-06	2.54187670002325e-06	6.27908554981337e-07	1.00435315318265e-07	6.22450561546419e-06	9.23976695593568e-06
pos_1545	8.19418553666161e-06	1.02227646751622e-05	7.14304363414474e-06	2.26131332784054e-05	3.89148320799565e-06	9.13587373055323e-06	1.20158869516469e-05	1.0006511196837e-05	9.10981777012089e-06	6.57955046599233e-06	1.80430203678585e-05	1.89306803429876e-05
pos_1557	5.77662575100288e-06	2.7171963813625e-06	3.67692261918262e-06	8.25140318782153e-06	4.56834538368613e-06	4.84818962866377e-06	5.20486591640956e-06	5.29026733233419e-06	7.10055688580617e-06	2.47426723899179e-06	8.41618070734015e-06	8.2192762083177e-06
pos_531	2.27750298682565e-05	2.49090442214905e-05	1.70211443467653e-05	3.37655388635384e-05	1.59732360284713e-05	2.58509205615822e-05	2.55543282846474e-05	2.68354351826145e-05	2.06164411988989e-05	1.92349541936635e-05	4.55050536484654e-05	4.12942102892507e-05
pos_2298	7.43944194919758e-05	5.46642110736462e-05	3.519719951856e-05	0.000168808084346057	2.24685578795922e-05	8.77038132220333e-05	0.000100059929253961	0.000114897228183032	3.5541653694895e-05	2.82440109276578e-05	0.000284910902747502	0.000252909702253356
pos_194	2.85243731828288e-05	1.89089468573599e-05	1.17827857711677e-05	6.17469624723199e-05	7.78635798089974e-06	3.28361214331345e-05	3.78758821383126e-05	4.51957639139785e-05	1.2080725749077e-05	6.57066834671759e-06	0.000108639168909307	9.61672779542794e-05
pos_253	6.50569985508459e-05	3.88531598940386e-05	2.31833532572606e-05	0.000141154214122962	1.44235102874569e-05	7.26799355403682e-05	8.49082870116661e-05	0.000101945204001838	2.4644626892151e-05	1.28435798080013e-05	0.000261833433841192	0.000227717309188201
pos_1532	8.97341725473336e-06	7.46558908978184e-06	5.19785136868026e-06	1.46768658007626e-05	4.30929199250938e-06	8.75887542032555e-06	9.4993215330757e-06	1.09114343685865e-05	4.55114316418157e-06	4.95553931704611e-06	2.14095318087241e-05	1.765315185793e-05
pos_939	0.000270150762200779	0.000243279697701336	0.000158338089629813	0.000485313944299983	0.000137236769220693	0.000294467267654485	0.000319484635184727	0.000364116068553298	0.00018099081528482	0.000157060927582149	0.000734176538647059	0.000625289375175836
pos_2640	4.41631182538893e-05	3.59247453845231e-05	4.19528294133412e-05	7.94373584834568e-05	4.0843001789911e-05	4.70401167481755e-05	4.25217247570684e-05	4.37904136526941e-05	6.35109888428913e-05	8.71331664523238e-06	0.000144462328205974	7.66244599806793e-05
pos_85	1.49551547459525e-05	1.33826078311573e-05	1.37375608104132e-05	2.67886052581449e-05	1.56304778793458e-05	1.72834533144394e-05	1.69148910926806e-05	1.78558506808693e-05	1.17647570186936e-05	1.03315910407229e-05	3.55450942183456e-05	2.29840734873878e-05
pos_1753	4.56874305413289e-06	9.18583571866851e-06	1.08193359546098e-05	1.90795882782787e-05	1.53342734409507e-05	2.50493870940448e-05	2.06351207637483e-05	2.56460038298737e-05	1.53087052737516e-05	1.81909928563235e-05	2.84327179556007e-05	1.31867230480053e-05
pos_2578	8.74660428373685e-06	1.04490570919532e-05	1.1696688939659e-05	1.36991625544846e-05	8.91864774664675e-06	1.46388391989801e-05	1.23401231386614e-05	1.47790286592089e-05	9.02075376518089e-06	1.62364342583346e-05	1.79953957107142e-05	1.26202814232952e-05
pos_1844	4.75534372355787e-05	8.51019687260532e-05	2.36331340806615e-05	9.7792605550552e-05	2.76546945854469e-05	7.54562444120095e-05	1.7308716180676e-05	3.18378679725374e-05	1.42103319834188e-05	2.90238347949456e-05	0.000275359716003577	5.484068101831e-06
pos_2248	2.99691573789716e-08	4.30294111109389e-07	9.40022041565355e-08	2.21813786575566e-06	7.5776232291637e-07	1.68368391307365e-07	1.76850754870433e-06	7.35771196453514e-06	1.57304380644631e-07	7.08161611667704e-09	2.91208607750465e-05	2.55559907527971e-07
pos_2526	1.47818999464143e-06	5.35258470911397e-06	1.05564961627657e-06	6.23798761108606e-06	0	2.16400010018138e-06	2.70658361312514e-06	1.68281891700194e-05	0	5.93137462020422e-07	6.0036511793396e-05	7.79413059431838e-06
pos_1950	1.34391661076663e-06	1.87164990928872e-06	2.57169297800504e-06	1.61718482675643e-06	7.16990381440334e-07	2.95401876770764e-06	2.27029618541872e-06	2.0862869668866e-06	2.11182366064583e-06	2.25328890778704e-06	7.91287438017276e-06	2.33643442665576e-06
pos_586	9.44868075277733e-07	8.81406730052692e-08	6.01301897984704e-07	9.03206719027508e-10	9.53999109924905e-08	4.22870322406704e-06	2.12952111729984e-07	5.0770435962377e-08	8.98316016632954e-08	3.17929378854087e-08	2.11672055257866e-05	2.23851280037282e-06
pos_831	2.98766807025069e-06	6.89984921568349e-06	5.67650831327344e-06	7.66475370982503e-06	6.90947636335895e-06	1.27356278076834e-05	9.52193608305621e-06	9.03222089664721e-06	4.12678696716367e-06	5.92298796637916e-06	4.37342674968698e-05	1.62552726838807e-05
pos_1407	5.18855724099993e-05	6.79199437292507e-05	4.87536631886777e-05	0.000219815959119168	0.00018190384911729	6.11622150866823e-05	0.0002142192943961	0.000370299957269009	4.89162292712085e-05	6.50062299058375e-05	0.000469484921772352	6.19503530038587e-05
pos_374	0.00101148642753778	0.000952435159597152	0.00150424990348782	0.00125851544156223	0.00166638190482699	0.00132952357132809	0.00146480077628252	0.00124051989343119	0.000960510173249723	0.000823763618892104	0.00236294020092609	0.00110378339105691
pos_735	0.000196175860349254	0.000204704200994352	0.000154308195843168	0.0002939393422157	0.000314569696647728	0.000253349273768681	0.000271766003621345	0.000248863679986728	0.00020415530840075	0.000133523366178511	0.000521047684372174	0.000259563775147533
pos_2649	0	0	0	0	9.83165832460491e-06	1.1378019526312e-06	6.49669213127219e-06	1.65806409012599e-06	3.54884043708186e-07	0	3.48464569400877e-05	6.60947797147066e-06
pos_1429	1.98406885052625e-07	0	7.13762865769611e-07	4.18241254994777e-07	1.37749174347705e-05	5.94792938132178e-06	1.21149173586827e-05	9.63720132814341e-06	5.41765593965526e-06	2.07764125951192e-06	3.64036886042437e-05	1.47889056684228e-05
pos_1810	7.62779449984339e-07	8.06509462893727e-07	1.0559898066231e-06	3.07778497463131e-07	1.85787338865426e-05	6.78169024184288e-06	1.40879254433435e-05	8.50461097608078e-06	6.07743470926873e-06	2.98327363235206e-06	4.27300177008652e-05	1.46552803337834e-05
pos_296	7.13976921490219e-06	3.47021215523975e-06	4.25113825610881e-06	5.7375161166198e-06	3.30198316145187e-06	5.03854611541903e-06	8.4599004881442e-06	3.03999269230402e-06	7.95851942409737e-06	2.98316369783971e-06	8.7500378082579e-06	4.86260211006806e-06
pos_772	0	0	0	1.05699229998112e-05	0	0	1.41712224674342e-05	0	9.36830770318069e-06	0	2.19256740963868e-05	6.3593061281423e-06
pos_960	1.73084433747964e-06	1.35215116942954e-06	4.23873131829984e-06	5.53380849195393e-06	3.33424040727367e-06	2.6787124262238e-06	7.44305960999304e-06	2.30683216729057e-06	6.06789255826534e-06	3.77500314609713e-06	1.07842813637247e-05	3.96638389729906e-06
pos_1584	1.23919114923134e-06	4.94836916839181e-07	1.93711057715684e-07	5.1121475529999e-06	1.57377923848678e-06	2.14372710224146e-06	1.09142629410219e-05	3.48680807247641e-06	4.20005541935442e-06	3.79149121931355e-06	9.24369904152406e-06	3.48679662782461e-06
pos_1949	0	8.97364696760771e-08	3.26629683610684e-06	1.26198644707979e-05	1.03229196633667e-05	8.14610724505924e-06	2.64398569936636e-05	1.1280813800308e-05	1.96719930579031e-05	2.20803628177473e-09	2.77529189722473e-05	1.0010410570775e-05
pos_310	9.6696014883964e-06	5.67001802007564e-06	8.05947709061507e-06	7.84654677213207e-06	7.42873745363954e-06	6.04726346559018e-06	8.9740518961635e-06	7.1729294602699e-06	8.21399283952853e-06	6.76742566732306e-06	8.51142959772735e-06	9.46036584920788e-06
pos_747	3.4388280679532e-06	2.6409164085044e-06	2.92719000102254e-06	3.19005044323414e-06	2.28626650085047e-06	2.77237523020557e-06	3.30110647375336e-06	3.29987051963003e-06	3.44364807250525e-06	3.29059491261449e-06	3.85508835594937e-06	3.53768695107735e-06
pos_1018	0.00011567053295177	7.20058131103287e-05	7.61088800513174e-05	9.85552802862361e-05	9.70593884024652e-05	7.99836207724934e-05	9.76318945493499e-05	8.43031729508929e-05	7.37978102172504e-05	7.5373485159326e-05	0.000100220916383672	9.70642213696361e-05
pos_1641	0.00109591638421683	0.000639156903715317	0.000717519419663392	0.000761048142123979	0.000931784038154627	0.000831303658877772	0.000904758208538929	0.000824844512144125	0.000808159890270523	0.00062002096435547	0.000876167474293206	0.000861023566658243
pos_807	1.97447598417514e-05	1.03847952918874e-05	3.98077271375439e-06	9.83197945074737e-06	1.44580766585693e-05	9.27302365462779e-06	1.22467618507821e-05	1.00841828336362e-05	8.78073402808556e-06	3.71139585853179e-06	1.14993824725489e-05	1.21713395973334e-05
pos_1644	2.59582313932326e-05	4.25335591256605e-06	6.45860166166418e-06	2.33296503603823e-05	3.50285823757499e-05	2.26115925714578e-05	3.03717792430619e-05	2.02690464406225e-05	1.40747292008032e-05	1.4354238348867e-05	3.3953377746853e-05	2.22959317961755e-05
pos_1274	0.00119747635924779	0.000873971346949496	0.000710317443318702	0.00113999403130631	0.00108420003496155	0.00103661141687738	0.00115019017385554	0.00117894969530224	0.00114223807058921	0.000748098160269071	0.00113406586125886	0.00123284302226703
pos_396	0.000459914655540221	0.000216265677312805	0.000185691128088792	0.000369931580188339	0.00035739300445741	0.000340021482792786	0.000360295352933905	0.000398043787825998	0.000445172532850542	0.000227258543905218	0.000412342673393558	0.000370340149530639
pos_179	1.46855057528133e-05	0	5.09720963919988e-06	7.49853684292155e-06	7.0312011372502e-06	1.31947987202626e-05	8.31964487240326e-06	6.69786683141053e-06	1.99033731753148e-05	2.38723064616179e-06	2.16488550951972e-05	1.26755452778363e-05
pos_612	5.48598413356536e-06	0	2.16594096011924e-06	2.02874031069299e-06	2.75931814400822e-06	5.47686709023132e-06	3.78098952201236e-06	3.10801921675926e-06	9.24984547492578e-06	2.7832026578342e-07	7.82037857975936e-06	4.79092252641912e-06
pos_1876	1.51914396233899e-05	8.84029485166375e-06	2.46919725145635e-06	3.56313439779402e-06	9.32890528082435e-06	1.20402017821468e-05	8.53743634395508e-06	1.15408746058953e-05	1.78499448690112e-05	6.28904353379302e-06	2.18277155739451e-05	8.07690802173327e-06
pos_190	0.000545204300247028	0.000353798051885545	0.000299944515356895	0.000275214110136873	0.000339283339385255	0.000467596168335896	0.00037649492751046	0.000487094802511239	0.000495874049657757	0.000284576462966253	0.0005061831348606	0.000449220664709464
pos_2099	3.31079892789512e-05	1.50195455446742e-05	2.7438307275641e-05	2.05745716154567e-05	2.35702494808294e-05	2.680256030968e-05	2.42488300262176e-05	2.21368152552604e-05	2.1319167512021e-05	2.16609322035162e-05	4.8963479122039e-05	3.33817733285296e-05
pos_1017	0.000197631208990756	7.91304040780834e-05	7.70840802711044e-05	0.000130972154679974	8.39818671919653e-05	9.56980163979704e-05	9.53021572679631e-05	9.46887785304565e-05	8.33473322646422e-05	7.5459557798376e-05	0.000212285799860619	0.000115368586481174
pos_2326	0.000189557093541976	8.73777297718629e-05	8.07665319404296e-05	0.000155142895395942	9.12818114389569e-05	9.94589851398823e-05	0.000102766871979669	0.000105162106255553	7.23095662648886e-05	7.80575726262909e-05	0.000226864251258331	0.000128322263178335
pos_1700	8.55052736769193e-06	1.30675658830625e-06	1.80500997873465e-06	2.31907347823757e-06	1.38214374655663e-06	5.17037831069622e-06	4.75445879113451e-06	2.9800153400283e-06	1.29684648062224e-06	5.71614490860371e-06	1.0781186028824e-05	1.11358534014882e-06
pos_2394	5.40743856942161e-05	2.91269343470001e-05	3.22028382026003e-05	3.70837547171611e-05	2.66224682270602e-05	4.68479506495799e-05	4.63261193339308e-05	3.85475528426171e-05	2.77474169757399e-05	2.66442562214238e-05	4.68405060789731e-05	3.53131949877253e-05
pos_2678	1.31918634207039e-06	2.14326546184496e-06	2.1510783529691e-06	3.6245048736744e-06	1.20865846295757e-06	5.89731804892491e-07	1.87114871317157e-06	2.21430256423033e-06	3.52656409122857e-06	2.35224291892581e-06	2.55848402770987e-06	2.37320173489539e-06
pos_46	4.97066303692986e-06	7.04776367707154e-06	5.19454133630534e-06	7.2218419465774e-06	5.18160965144622e-06	4.55763023479665e-06	6.36044702560422e-06	6.9846194578425e-06	6.82881593618377e-06	6.84737872163707e-06	6.78528436462126e-06	6.64724175819094e-06
pos_2279	5.81248732716293e-05	6.2767069501219e-05	5.55356607066907e-05	7.75937490192712e-05	5.13611861639321e-05	6.03273088319992e-05	5.8861226482394e-05	6.39995480511805e-05	6.26322847173692e-05	6.66542087076351e-05	6.64228527851484e-05	6.31996316704585e-05
pos_2599	4.88893104233074e-05	5.64254440011774e-05	5.51813435167576e-05	7.39771311398314e-05	4.47738830434078e-05	4.51414247436176e-05	5.42227361568071e-05	4.60187047636781e-05	5.48792158419953e-05	5.53149622823581e-05	6.31993308693238e-05	5.31676180517487e-05
pos_787	4.84334857776385e-05	6.9532606508231e-05	4.87152311227749e-05	7.22053648037267e-05	5.27260296236063e-05	6.89434045889667e-05	6.27620175132449e-05	5.77807475523785e-05	6.01563588864547e-05	6.28447943336518e-05	6.70646356974576e-05	5.74072370919069e-05
pos_1669	4.31545741645924e-05	5.0495137192861e-05	4.0901727250148e-05	5.12286675812032e-05	4.18091555913318e-05	4.79685760872012e-05	4.25008422378778e-05	4.69083069423442e-05	4.94550253269777e-05	5.08048571777306e-05	4.57364107528493e-05	4.27234572354362e-05
pos_1679	0.000154701973038114	0.000179144084840424	0.000148415600484578	0.000195941432172398	0.000148305006257035	0.000175657608569503	0.000160329562274518	0.000172629777011495	0.000173998486513487	0.000169891187214366	0.000162498498848484	0.000156150243010567
pos_1879	1.18822384149492e-05	2.45160549810586e-05	1.46604925081418e-05	2.53028507636978e-05	2.05340990150392e-05	1.90429023459422e-05	1.6368358705574e-05	2.46609552221435e-05	2.14489787316075e-05	2.09686258269192e-05	1.99056614388159e-05	2.40307595272882e-05
pos_1266	0.000204886106694779	0.000380105584755001	0.000159505151539248	0.000403640525728823	0.000198777158643796	0.000217349770564892	0.000210802988932367	0.000284875793930853	0.000174982708211149	0.000293733312554703	0.000314578995703898	0.000284502880589004
pos_1102	4.17826609103079e-06	1.2343519330315e-05	6.05881533456244e-06	1.19312306463555e-05	4.89751170458604e-06	7.07134039249448e-06	3.54730352353346e-06	1.03722428993571e-05	2.1104414017877e-06	8.59151737455894e-06	4.93544574096887e-06	7.7278223224841e-06
pos_752	4.97297049717252e-06	1.50299793818013e-05	5.04308296412609e-06	1.68813221501024e-05	7.43959010789253e-06	1.05154237140285e-05	5.0603480352109e-06	1.15585592522548e-05	5.25479742916294e-06	8.46660139180586e-06	8.75531575950258e-06	9.52285980970723e-06
pos_2163	2.4615723921498e-05	5.91354617591669e-05	4.86092071067634e-05	0.000105040059002754	7.44719730599054e-05	4.86649703716165e-05	4.39335285172298e-05	3.30770213795332e-05	3.15521869984874e-05	8.22422469379374e-05	3.19932853073162e-05	1.29804101122195e-05
pos_286	0.000223869503777332	0.000260739605242808	0.000226263214335516	0.000282781261171758	0.000250450233844394	0.000231656214243772	0.000249974214468431	0.000251825519588848	0.000231908072866112	0.000252942355857194	0.000223623936807514	0.0002388889438579
pos_1809	4.43782497711469e-05	5.52205019654041e-05	4.11367622080833e-05	6.94340682468809e-05	4.60872186660768e-05	4.93062433354302e-05	3.84363191846255e-05	4.97265770749784e-05	6.54054825990044e-05	6.78072144921744e-05	4.76637679553783e-05	3.30134975581554e-05
pos_711	6.33273591918296e-06	9.93945069763255e-06	1.07102213193588e-05	1.92277987389989e-05	1.10329711368399e-05	8.76759675049788e-06	6.1242149643055e-06	9.14083787142129e-06	1.28478964055564e-05	1.26497753357389e-05	7.74726047168391e-06	1.81839296452655e-06
pos_2448	2.10566181780601e-06	2.81812203614476e-06	2.31940270672947e-06	9.81371104127437e-06	5.42534175502752e-06	6.37512888430624e-06	6.05845625924512e-06	7.03885312964125e-06	7.01353572411076e-06	6.13637922698417e-06	2.64541593276773e-06	5.09400111598504e-06
pos_798	1.6956750080396e-06	7.77793873331401e-06	1.503468386856e-05	2.40528488564514e-05	1.03040667462538e-05	1.0532336708053e-05	1.02725438747236e-05	1.31779001560826e-05	1.47276165540698e-05	1.88154000531412e-05	8.00830256888349e-06	8.45664959978502e-06
pos_1191	8.81785420039309e-07	1.03716539760797e-07	2.49318155527821e-07	3.3606831067074e-05	1.37063108238134e-07	6.20085336290039e-06	3.83447972477814e-08	4.12452507045952e-06	3.87049556188928e-05	6.45426134157477e-07	0	7.18416541189985e-08
pos_2782	8.05934475433336e-09	0	9.98284626725042e-08	4.38172018263654e-06	7.10993554586885e-07	2.05233929644021e-06	4.65873131456837e-08	5.81560767178638e-08	6.46998614865635e-06	2.37351068875632e-08	0	9.45412619500859e-09
pos_350	0.000610504807208111	0.00072393870131201	0.000686327719033741	0.0010385862261949	0.000556433951737452	0.000712125847622297	0.000495340760859413	0.000606869124663833	0.00110655336690553	0.000479691981415104	0.000363585595653199	0.000393316053490399
pos_360	0.000422657109573755	0.00043437115681212	0.000335538637541869	0.000712533519535583	0.000398742057755038	0.000493035650484907	0.000331850961735969	0.000381907096918642	0.00101798675842231	0.000243749060515126	0.000200587521415228	0.000270309217709879
pos_1255	1.91400038761641e-05	1.10764153517085e-05	1.25078357281229e-05	2.61542542847531e-05	1.62428732483834e-05	1.77587787598511e-05	2.78702079372639e-06	1.04460961960309e-05	1.9067164606927e-05	7.89777717165462e-06	1.0168705385975e-05	3.46135309996147e-06
pos_1623	6.35340978612345e-05	3.65764378166219e-05	1.38549669418466e-06	7.99201991972338e-05	2.15370733757334e-05	3.7152147158804e-05	1.66368135511556e-05	2.56321313611458e-05	8.28638047619001e-05	4.55808533874801e-06	1.4632278924909e-05	1.33097198084846e-05
pos_1055	0.000264842635770179	0.00029094232585622	0.000177412652330676	0.000308720350218827	0.000183618251754766	0.00024319723052925	0.000182325865224609	0.000216376193362925	0.000306926742897239	0.000203820898416213	0.000194010216677286	0.00016395292846032
pos_373	0.00068201964550218	0.000694472335110317	0.000347037474226162	0.000954528768768032	0.000258290998134366	0.000609055602324551	0.000219250495527349	0.000402660662184452	0.000942760545272871	0.000357474974326236	0.000265155349416237	0.00017760102097413
pos_1523	9.85984422473146e-05	4.20973635087766e-05	4.2851998915324e-06	0.000192176802880356	1.98120512525695e-05	3.87081265495862e-05	8.02993743649772e-06	4.43451116017082e-05	2.14074501152174e-05	4.08518285705479e-05	2.51247022282717e-05	1.76293984375643e-07
pos_447	2.13242631700291e-05	1.56616352270017e-06	1.03204207344069e-07	3.03957998490785e-05	1.45057909569877e-06	5.42463995771331e-06	2.29405334880421e-07	4.61971143588715e-06	2.14521873058057e-06	5.48191629445635e-06	2.23530713535295e-08	1.57515648858303e-07
pos_362	0.00321429148199038	0.00119320952915625	4.2433455951506e-05	0.00573706046458473	0.000192036515705298	0.00138898930387232	0.000343995330278537	0.00132005516501419	0.00241914205211154	0.000547875987824616	0.000352940832110498	0.000572736996619415
pos_95	0.000164733505267883	5.52521246929405e-05	2.92622296013594e-07	0.000309738863360856	6.94595829841447e-06	6.68484183611925e-05	1.47559988357517e-05	6.15596896602817e-05	0.000123294110612356	2.39461567643528e-05	1.57258697035843e-05	2.59463258315259e-05
pos_2553	0.00012508407240431	3.71708192026817e-05	9.12196120175171e-06	0.000121805741897046	7.75401332935037e-06	3.79885656032865e-05	8.16289855051776e-06	2.84979434409809e-05	5.56025126501246e-05	1.86609852290504e-05	7.67347546973075e-06	1.17325864674505e-05
pos_1868	0.000169407912439368	9.17935869360749e-05	3.13708816441336e-05	0.000205342119397906	4.54578118789696e-05	7.4638936097628e-05	4.13982214541523e-05	7.62087253477864e-05	8.13076425328247e-05	4.61003280706009e-05	3.28116853793894e-05	4.8671607652025e-05
pos_136	0.00587146015636069	0.00304392233094023	0.000453814922389576	0.00747615734486529	0.00064638126608757	0.00243252080725715	0.000871155695349433	0.00226674945931043	0.00261636085813087	0.00139788880346509	0.00102204846443927	0.0013437158991428
pos_207	0.000674884042701057	0.000279154783470925	2.81365189586508e-05	0.000872912803806677	4.95682308267777e-05	0.000263932387195746	6.50177745536865e-05	0.000223510726771953	0.00033998953725746	0.000133626296305598	7.79580758511863e-05	0.000100543130898994
pos_958	3.45849162902638e-06	3.40532599785383e-07	1.31556292487756e-06	5.25579062945504e-05	1.88685889055175e-06	2.00223301876939e-06	1.12154633547466e-06	1.83108762976048e-06	3.27065309126751e-05	9.12574258785712e-07	6.55811252819412e-06	7.2336062772094e-07
pos_2086	9.59286142914417e-06	1.24785758493866e-05	8.65106563304702e-06	2.49423988761962e-05	1.13206939153372e-05	1.52454207615558e-05	8.95794395130438e-06	1.29625024256256e-05	1.34253822089282e-05	7.6273156790499e-06	1.12171926005907e-05	4.98662555520474e-06
pos_1389	5.96204382176876e-06	5.66769610115565e-06	5.55463672641555e-06	3.22861380077625e-05	6.22553634272795e-06	6.65789389596654e-06	4.18881557049488e-06	1.11631703287356e-05	5.76885868273064e-06	5.26684746104937e-06	2.97796051560321e-06	3.63854913717342e-06
pos_1209	0	0	0	2.11825078987818e-05	2.43383066350026e-06	2.65766938136049e-07	1.277622722622e-06	2.30164018934591e-06	3.75332484477294e-06	0	0	0
pos_2159	8.09542446849554e-06	9.93460440829283e-07	1.98685515357455e-06	0.000104373707189426	7.79593817315804e-07	1.46111941287424e-06	0	1.14750843604747e-05	5.98703315857142e-07	1.3441099620438e-06	0	0
pos_697	0	0	0	0.000137729724164871	0	1.68302073364577e-07	0	7.89122104054784e-07	0	5.35383263923174e-07	0	0
pos_2753	6.03031852816888e-06	2.68565741517838e-05	1.41925983558903e-06	9.36056872543543e-05	1.69557458893837e-06	6.33411393739679e-06	1.5475372225404e-06	1.43931630267056e-05	1.28052432731677e-06	2.52684985825369e-06	3.04086072502673e-06	2.72365894218465e-06
pos_631	0.000203394266782354	0.00024299662315369	0.000158613641101249	0.000444877017709728	0.000184902134390936	0.000185232620581929	0.000179257148831012	0.000214812038935674	0.000212303678259394	0.000152896753933349	0.000131306746626038	0.000170470275048644
pos_1452	5.51703742215851e-05	6.06306328854297e-05	5.34374185239403e-05	6.2921727920686e-05	5.9223691788947e-05	6.14743794270948e-05	6.21984171884682e-05	5.87521091165813e-05	6.07470863076723e-05	5.35041466488998e-05	5.6012205209551e-05	5.90480604124604e-05
pos_199	0.000355232325585467	0.000403701404186682	0.000336769059934051	0.000414224279858156	0.000393975453489075	0.00036433881786338	0.000379045753613406	0.000370888022775937	0.000386449156010971	0.000338669906120263	0.000384836903878457	0.000362078002878098
pos_2681	4.5873176170116e-07	9.85811788674072e-06	2.65234352831484e-07	1.59304931081016e-05	1.13722696043115e-05	4.86733596780964e-06	8.52349892362375e-06	1.05322851284378e-05	7.30728316696103e-06	2.2295255498568e-06	5.09962743838088e-06	3.91297661717355e-06
pos_1212	0.000974146211597171	0.000897064246290581	0.000729536475570372	0.000967605372137651	0.000953318817376734	0.00087132241235236	0.000872557944304068	0.00085394081881542	0.00105349856170596	0.000634693927605113	0.0007955980938466	0.000796117564478134
pos_1438	9.73542520159421e-05	0.00010437843257906	8.08352729451344e-06	0.000158100604737809	9.69744316466603e-05	7.10072129077629e-05	6.70861878063754e-05	7.81340096292719e-05	0.00015091296186761	1.17726796441373e-05	3.76651217656453e-05	4.23671815246446e-05
pos_733	6.64775802209195e-05	8.71705963692301e-05	2.20938461345481e-05	0.000112386467325524	8.29179909692678e-05	6.13268003751131e-05	6.0085336493065e-05	6.5723789923626e-05	9.9574053670721e-05	2.70627112463737e-05	4.04908709762394e-05	4.38877153327767e-05
pos_2454	0.000337905760034986	0.000317987633483106	4.98267537063989e-05	0.000417594055088122	0.000321546524584577	0.000254553533159748	0.000255237043287465	0.00025116559695426	0.000441004775179913	5.63203726639883e-05	0.000152987131161874	0.000184577942786173
pos_603	3.02996997649147e-06	3.04386983584162e-06	8.38505103894276e-07	4.5034108657402e-06	3.74315186199969e-06	2.26916647505199e-06	2.74883126486506e-06	2.28548120636516e-06	4.28118574230405e-06	9.72494124863458e-07	1.74375673509531e-06	2.10839959949205e-06
pos_1387	3.08535465441221e-06	4.36112629158822e-06	1.64972708955126e-07	8.57703935342127e-06	8.27645202096129e-06	2.17453389570295e-06	1.34003361273079e-06	2.80674415183221e-06	8.79837456478572e-06	1.06517403470054e-06	1.83356285771595e-06	5.39292529443982e-07
pos_2525	5.23567740719502e-06	6.10852455395543e-06	3.89204884018037e-06	5.94576026930914e-06	6.85183372892717e-06	5.67507013199788e-06	4.57153834818318e-06	5.47139150509515e-06	6.38941794700283e-06	3.43925703170368e-06	4.77625395537121e-06	4.34004115015581e-06
pos_2741	4.17297148054925e-05	4.89691340668744e-05	2.83735583905414e-05	5.27891495428728e-05	4.83100942258723e-05	3.85804712448059e-05	4.85846144096681e-05	4.68141057310578e-05	5.3986625312883e-05	3.55977111310652e-05	4.48189612960984e-05	4.78643623876157e-05
pos_2818	0.00235824385694157	0.00235263455369134	0.00171112266121827	0.00257618137716595	0.00240390475094754	0.00224540180128855	0.00255838605457016	0.00240450867738198	0.00269144446945568	0.00211726016582463	0.00198967333607334	0.00201991994975389
pos_111	0.00300536694767331	0.00287317947780359	0.00211097139637633	0.00339960244002344	0.00313293383483993	0.00278271686302296	0.00322939376462565	0.00303257364417858	0.00356735876284141	0.00223801583863511	0.0024631817672551	0.00292537918702298
pos_774	2.30074587608427e-05	2.17733253817927e-05	5.42305597905183e-06	2.59842554607723e-05	2.68836269334884e-05	1.86129486810726e-05	2.21865362285294e-05	1.97613741319204e-05	3.45281097892059e-05	7.28388083495631e-06	1.34494950068809e-05	1.65473456238581e-05
pos_2711	3.34484071139057e-06	4.99680034201956e-06	3.46633678495013e-06	5.78463924529416e-06	5.3125520923536e-06	3.20564016017936e-06	4.76591408964865e-06	4.90764556663515e-06	5.91112566499888e-06	4.91211040782187e-06	3.93242188761917e-06	4.60801385377776e-06
pos_320	1.77350681159829e-05	2.66839489006737e-05	1.86869366654581e-05	3.17452174303325e-05	2.55992044289946e-05	1.63245291492181e-05	2.67821847633612e-05	2.11432103269056e-05	3.42374114559091e-05	2.47927952556116e-05	2.19852704424417e-05	1.65805364022689e-05
pos_2363	6.98835967882063e-05	0.000135412860949076	7.6666067382952e-05	0.000130243818694702	6.93051040679194e-05	6.90349696884902e-05	0.000118780651834293	8.10166711798327e-05	0.000141191629545234	0.000110533557456827	6.91607327819511e-05	8.30212353636031e-05
pos_2534	0.000180652089211543	0.000223946488691023	0.000186344082090371	0.000224232072848342	0.000197633362733642	0.000151361223767612	0.000199205501031399	0.00017452028196234	0.000204017723239879	0.000210371908052917	0.000155709303687548	0.000164147680938831
pos_1534	3.63811072416151e-05	3.77794381751597e-05	3.45079780121485e-05	4.01323976587732e-05	3.83516385775183e-05	3.62583770274909e-05	3.8820388195475e-05	3.85132611496119e-05	3.8198469205698e-05	3.851614028093e-05	3.25636457174487e-05	3.64893783176681e-05
pos_712	9.12446574142677e-06	1.02995616398503e-05	9.986111516374e-06	1.60773069472738e-05	1.53025072604026e-05	8.19919648349784e-06	1.1598255629159e-05	1.47580027916707e-05	1.67435780363199e-05	1.21023278636396e-05	6.22264874383259e-06	9.82554437988577e-06
pos_743	0.000111498772023545	0.000111149498181917	9.52249377054124e-05	0.000248057048031931	0.000209107003534803	0.000116130138468871	0.000140869202976909	0.000140806782506903	0.000197713275856894	7.73365170822378e-05	6.04528554392901e-05	7.85921374199327e-05
pos_150	0.000192763131508112	0.000206350176913844	0.000204210143487219	0.000925177211819921	0.000593640186752635	0.000238873144141349	0.000448896660910875	0.000554984502064514	0.000563023950820582	0.000149773700879272	0.000128270966574903	0.000216486927404874
pos_208	1.82555845445908e-05	3.14026448937401e-05	2.90784323451311e-06	9.01848962553237e-05	5.82154544414988e-05	1.96655040199851e-05	3.74410814806621e-05	4.3180108291155e-05	5.18372667026291e-05	3.42303438986385e-06	1.27165316040064e-05	1.00197728028241e-05
pos_1380	3.8533823709197e-05	8.92111201940979e-06	1.24252103485763e-05	0.000120031862252035	2.77675418304424e-05	2.5110660341257e-05	3.07455295139841e-05	4.15111999460586e-05	8.93930421140541e-05	3.95747349173901e-06	3.36055727216099e-06	3.77139177942038e-05
pos_891	0.000145514080746844	0.000135708464112621	0.000117273729542928	0.000265687547906051	0.000194464740727471	0.000152093865062533	0.000181046828260833	0.000174170477292138	0.000277106420977813	0.000117506546445977	0.00011009518128215	0.000193891180257932
pos_1480	1.39333330392685e-05	1.24164875430238e-05	1.38611699571701e-05	1.89601134794295e-05	1.14405555939765e-05	1.21679897725406e-05	1.19097048775731e-05	1.1593548923851e-05	1.18332864083133e-05	1.09242611069736e-05	1.25431662672957e-05	1.26539655704281e-05
pos_417	0.000143847233229564	0.000141044145446847	0.000133618281270975	0.00020454682601545	0.000129304503134989	0.000131065561275121	0.000122792265624447	0.000133281132791888	0.000116840593985921	0.000130301065203974	0.000121491823679	0.000136228458566575
pos_1386	6.44850184610335e-06	1.28514119654289e-05	9.69427562872753e-06	6.45148083356849e-05	2.96329475040052e-06	1.43166620884793e-05	8.87541448168644e-06	1.4942324116472e-05	3.98289676486193e-06	4.07183893969935e-06	1.78616975243178e-05	2.00757588680286e-05
pos_2532	1.46273394693293e-05	1.95760410676616e-05	1.63555534556035e-05	4.95868157181232e-05	1.21813983890383e-05	1.94497101349195e-05	1.52154934589437e-05	1.52623314717108e-05	1.46053726880258e-05	1.54681745033204e-05	1.61107808616947e-05	2.16189280747004e-05
pos_980	5.5047413245507e-05	5.62296857313714e-05	6.08199622032845e-05	0.000106396713558894	4.28820078800525e-05	5.67056991091036e-05	4.76058774421087e-05	5.73039292463835e-05	4.40094156066114e-05	3.54590823699089e-05	5.66584542675308e-05	6.00950918907727e-05
pos_2127	0.000137218923530953	0.000155750168141423	0.000201885247824817	0.000370652796686057	5.57425343054004e-05	0.000142128753633995	0.000120556119824095	0.000148604280341751	8.10324452684475e-05	9.6144861211563e-05	0.000176737741198772	0.000180628986168697
pos_618	3.88494758794828e-05	6.93118132154328e-05	7.77666858076647e-05	0.000146140057205093	2.376998211229e-05	5.62282753913442e-05	4.24039575246725e-05	5.17240399306027e-05	2.91581982151937e-05	2.61379108525659e-05	6.55261184033731e-05	7.58219218515971e-05
pos_819	5.74960849988007e-06	5.35911969517964e-07	2.66056552948666e-06	1.56281929270167e-05	6.09958751485501e-06	3.77287843313558e-06	1.57341497728672e-06	5.47983343577749e-06	1.78858764188996e-07	0	6.5890584275701e-06	2.47749940256845e-06
pos_1260	4.60237710142283e-05	3.8628921720046e-05	3.61192064790383e-05	5.88927951278319e-05	4.13617462310764e-05	3.98669725760947e-05	4.31265979127535e-05	4.19093954210075e-05	4.12902427147342e-05	3.34444995108296e-05	4.32311090433325e-05	4.28120903408603e-05
pos_480	6.31792740282317e-05	6.61251518758961e-05	6.71587709403905e-05	0.000116290094330828	7.31749102136135e-05	6.57570026377333e-05	8.02327384175324e-05	6.93452523708435e-05	6.81921266791464e-05	5.32539982266738e-05	8.56463043547466e-05	8.04236415687857e-05
pos_1131	6.23874571125796e-05	1.02617891288301e-05	6.80651826173019e-05	0.000106095541287247	6.19867694682542e-05	2.82746672837383e-05	5.86829021339649e-05	5.62905087017876e-05	2.5239081290448e-06	1.74685799221951e-05	7.0759421750313e-06	3.8325855891683e-05
pos_917	3.20244646242746e-05	1.20008778401793e-05	6.34610588411288e-05	9.31679031201463e-05	6.2140769572406e-05	1.77077534761519e-05	5.29705269322758e-05	5.3836452265062e-05	6.31988543743682e-06	1.5794807782188e-05	5.66764795165095e-06	3.98242997293542e-05
pos_624	0.000263537721826919	0.000340130426494548	0.000284589848611309	0.00261024534116614	0.00144325414359421	0.000287326677787498	0.000993144709806768	0.00118070796833839	0.000235123589470042	0.000221654624527421	0.000442770800260075	0.000384684055339534
pos_164	0.00014429204914987	0.000127758672645708	0.000116557046928398	0.000279338064091995	0.000166810355639073	0.000127960021843908	0.000128430077174762	0.000154008559841529	0.000155827395256847	9.60295839375154e-05	7.34291006266935e-05	0.000104258293628264
pos_198	0.000234972751636768	0.000218988954192471	0.000190560949563502	0.000580563280131757	0.000309358236378692	0.000209840471825749	0.000223311914308416	0.000277067428701396	0.000298225711916072	0.00013342972807266	8.92606256495759e-05	0.000147232936458473
pos_1240	3.88967345830555e-06	1.33615726966181e-05	3.21594093460237e-06	6.91936609180835e-05	2.01979521015085e-05	6.34202507584265e-06	1.09491604923756e-05	2.40757810065867e-05	1.11241757334634e-05	1.81877034261182e-06	3.41981749968606e-06	2.52476504513961e-06
pos_509	1.20368825970894e-06	2.17077767222521e-06	1.52453029962736e-07	1.04557246923022e-05	3.82390865603579e-06	4.32584112072782e-07	1.30285262098871e-06	3.04600605865141e-06	2.99727348659282e-06	0	0	0
pos_2196	1.33596983046455e-05	1.79916144750811e-05	2.18155619504515e-05	3.14564743524474e-05	1.9475174880179e-05	1.50300876139465e-05	2.44957197869696e-05	2.69186108559527e-05	1.25738260038678e-05	2.35501092400871e-05	1.45715430456606e-05	3.5921053755078e-05
pos_4	9.15738053998581e-05	0.000129439438364555	0.000125054196657801	0.000175281085928984	0.00013746018411638	7.63506916537527e-05	0.000146424513581234	0.000100086875284302	0.000118757544492256	0.000104463117622897	8.7050951573961e-05	0.000151745157164841
pos_12	0.000371812854488535	0.000480574393653544	0.000503559273685996	0.00061293130214648	0.000378543400659467	0.000310580700323051	0.000435501006544614	0.00035793589936024	0.000306175872046285	0.000386280193092769	0.000353765727995651	0.000546282514999064
pos_13	2.23969131286124e-05	2.45634066321134e-05	3.06808072090743e-05	3.07768986298694e-05	2.32739563592637e-05	1.80085358199754e-05	2.38366194607509e-05	2.12526076891193e-05	1.83684777618099e-05	2.20794098373643e-05	1.62846721844283e-05	2.78755243416126e-05
pos_2057	2.87823582460224e-05	3.57418213349484e-05	3.27381035799066e-05	4.81189069811282e-05	4.82122720394676e-05	3.92927062334747e-05	4.09024054913717e-05	3.85696711271216e-05	2.45607539677717e-05	3.3445086941365e-05	3.27700821866356e-05	4.33176542479318e-05
pos_2482	3.53186567160188e-06	5.04701545359071e-06	4.48969499002613e-06	5.94951286616722e-06	5.72494201785312e-06	3.50657546396496e-06	5.48319817318222e-06	5.64773775873412e-06	2.45501564951924e-06	4.55349934694708e-06	5.12188724210015e-06	5.61722742569338e-06
pos_745	1.73749789284934e-05	1.353464842701e-05	2.92498108060903e-05	4.39280675627102e-05	3.22322825314949e-05	1.736142696542e-05	2.76576033117089e-05	2.31887983036095e-05	2.8624548439457e-06	5.00030735438028e-06	2.80401743838655e-05	5.1589452665336e-05
pos_1525	9.04275346891121e-06	9.76067837167067e-06	1.01190940769255e-05	1.05333546232825e-05	1.33780050411634e-05	6.47366813049021e-06	1.03411199497976e-05	7.8388282003383e-06	5.53026156787633e-06	7.7777650873554e-06	6.6960510921941e-06	1.5000174217554e-05
pos_2573	0.000240107505502013	0.000273001645860926	0.00027484450852713	0.000284860851857344	0.000316783712279081	0.000224998612606628	0.000290676393569102	0.000253843559755103	0.000234796892084767	0.000224774427234256	0.000236893346022484	0.000351353606834885
pos_39	6.6613822984998e-05	6.82317648693005e-05	0.000138778474589391	0.000219023871879198	0.000142133806240331	5.45711169400529e-05	0.000228914691663387	0.000102767951404759	5.32014466010217e-05	7.3165985784274e-05	4.68878999231789e-05	0.000305516516127399
pos_840	0.000371854884686684	0.000521113807433651	0.000646535397121394	0.000963338498961197	0.000986370561627485	0.000390644369507376	0.00116705103356387	0.000505268756219604	0.000418345758336657	0.000459049920378506	0.000470635162790533	0.00112196069131797
pos_127	0.000117916938390634	0.000113325431419415	0.000169691645531653	0.000244646794679133	0.00015427288294963	0.00019741420336357	0.00018457185312733	0.000170608791513432	0.000195749992287513	0.000130435700537528	0.000145030011238655	0.000168351928750424
pos_621	4.25432484326998e-05	4.91960153638907e-05	5.96568821098145e-05	6.64174299111858e-05	5.4665114627879e-05	5.97813002983094e-05	5.43919662160392e-05	5.90466613830832e-05	5.45063725174609e-05	4.31358821767929e-05	4.04207625330721e-05	5.15731133042868e-05
pos_1187	0.000209110797246378	0.00023994826332225	0.000206351446990471	0.000281855018191014	0.000233039266567345	0.000341816885626828	0.000273994051316073	0.000297194034140286	0.000251404330226527	0.000208454926273643	0.000228895965686212	0.000213472305723146
pos_487	5.80824845967063e-06	6.46974032523375e-06	6.1101959942681e-06	1.37677915291854e-05	1.03775775433099e-05	1.17293837589833e-05	1.33832737426798e-05	1.33231882398193e-05	8.07655734697611e-06	4.01150470592156e-06	5.98817936688622e-06	3.75144599379181e-06
pos_1959	1.31844467005389e-05	1.44579466792835e-05	1.31469509562629e-05	2.08177657397047e-05	1.30786150468309e-05	1.67515603129401e-05	1.77617498506769e-05	1.87866978775031e-05	1.45084760990583e-05	1.43584974131885e-05	1.84318072607794e-05	1.70342675931505e-05
pos_2613	0.000484206959178751	0.000442814039109861	0.000423286368042145	0.00247873489847143	0.000351992217276292	0.00109868783511714	0.00108561381551744	0.00204127355806662	0.000401799420958882	0.000401571655375294	0.000464270687925337	0.000384830040725994
pos_1249	2.62968983836385e-06	4.41150192560898e-06	4.97797653238683e-06	7.24801579382881e-06	6.67223761888877e-06	5.72121314580859e-06	5.65853649207721e-06	8.55070703871328e-06	3.6449387498287e-06	5.45775415226494e-06	5.63090614321353e-06	5.15841637454096e-06
pos_2239	5.45212184994042e-06	1.82066138681808e-05	1.64429695740997e-05	2.73351384257198e-05	2.12539845509043e-05	1.61972083420225e-05	2.67550951379954e-05	2.34547744232487e-05	1.85296126499188e-05	1.94512799102411e-05	1.84277692530972e-05	1.70754116550424e-05
pos_2332	2.15104065355844e-05	1.89554642636277e-05	1.69793380215273e-05	2.67298138582658e-05	1.95514531868853e-05	2.2057077003167e-05	4.69561852101513e-05	5.96111627335851e-05	1.79702222573245e-05	1.56369474734598e-05	1.87900289686271e-05	1.32624265426325e-05
pos_340	2.67274942059776e-06	1.08011694625764e-05	1.24616294460533e-05	2.18809219421123e-05	2.60189936031034e-05	1.46620134766884e-05	2.85088338395626e-05	8.16324112558009e-05	1.78111673324469e-05	3.25493897258705e-05	2.69469706878023e-05	3.74389114702975e-05
pos_672	1.33678379694594e-08	1.43018464496792e-07	5.72113042841327e-08	3.86854439638482e-08	3.89933023311523e-08	3.30376655999706e-08	9.42663487580235e-09	3.71351680791999e-05	4.32428401443181e-08	2.20620767362426e-09	4.50124948983438e-06	7.76220780097233e-09
pos_890	2.32870013799855e-05	3.25051820951816e-05	2.8492893272465e-05	7.22879316376334e-05	3.91302281699145e-05	3.19757014538018e-05	3.51190233911174e-05	0.000479620121305167	2.97802009032457e-05	2.72977812274901e-05	7.52084660739774e-05	3.92323675445065e-05
pos_2413	3.28399889458844e-07	9.48620136244056e-07	5.47456611866807e-07	7.91101751457911e-07	4.04529890790192e-07	4.55980551108682e-07	8.24978903659588e-07	9.50465432834025e-07	9.27545345695235e-08	3.08458224751874e-07	3.55554902916474e-07	6.25057307880283e-07
pos_1360	2.09527933839213e-05	2.97526053201771e-05	7.33245523830438e-06	7.56990367163447e-05	5.97754242503466e-06	7.86335817362492e-05	6.91401888843919e-05	8.61492390273227e-05	6.64977917681452e-06	6.5930802590592e-06	2.9799969085188e-05	7.56425234322213e-05
pos_2557	0.00828374034143372	0.00940077607693951	0.00470221897267896	0.00935830414992716	0.00614769060086394	0.0105907136480411	0.0102316643889816	0.0104424754406445	0.00550412646275679	0.00596652649767274	0.00709174357539526	0.00848451079544205
pos_426	0.000115194958975412	0.000136594343270812	0.00010326282977024	0.000154716859930025	0.000120606073776661	0.000125979298514684	0.000131916234755038	0.000131687463517926	0.000118466335652596	0.000119282149375515	0.000143949511807172	0.00014425230351188
pos_809	2.62242161238662e-05	3.1378480293161e-05	2.37760213158706e-05	3.50720335803352e-05	2.92259611970587e-05	2.77403092613314e-05	2.76615545608348e-05	2.7743768221175e-05	2.50221920465808e-05	2.51044519898211e-05	3.03824838983682e-05	3.17164425005923e-05
pos_1204	1.72244956987785e-05	1.77801948055602e-05	1.46376610766885e-05	2.00138942751765e-05	1.69863165196673e-05	1.7658859978177e-05	1.76414911637018e-05	1.82490370048613e-05	1.71872965971099e-05	1.59793806380109e-05	1.81616907916737e-05	1.70243635171296e-05
pos_2392	0.001538462908499	0.00159075737392506	0.00123643583301143	0.00185111201167434	0.00165004130889447	0.00147046806592357	0.00163957795680806	0.00164642531816513	0.00134562753623272	0.00150090529257942	0.00159810729761374	0.00149401262391014
pos_356	0.000126090490540871	0.000319248393678642	0.00027578965089065	0.000941848377338815	0.000618398933988961	0.000406974119023448	0.000496447126816094	0.000668689973251271	0.000325448108057457	0.000606449820279933	0.00100175203958519	0.000323939492293493
pos_533	6.44227461575229e-08	1.81561102823495e-06	4.33158419460421e-08	7.28854368649122e-06	9.1453193810445e-07	7.46560718815969e-07	3.589447089193e-07	1.82566559776486e-06	8.08783304027327e-07	3.98313068000273e-06	8.26679251766232e-06	9.20784988246131e-07
pos_550	4.07960217389282e-05	0.000137749552255913	4.07290383483853e-05	0.000477710637646322	0.000137239115551171	0.000214805216960238	0.000159741964168342	0.00023290413498367	0.00015594058552023	0.00023186156975873	0.000751838954028861	0.00017484658026255
pos_34	5.85257686358482e-05	5.94192399916295e-05	4.98630313112285e-05	6.72399293805283e-05	5.63789082107774e-05	5.80998775265359e-05	6.61826200082541e-05	6.33443684050659e-05	6.25190567239409e-05	6.02542286633809e-05	6.73484100365482e-05	6.15079520922165e-05
pos_29	0.000137361767333589	0.000158217190366615	0.000113444111046642	0.000155544283985574	0.000132561987975703	0.000145507031413381	0.000159733591737369	0.000167761754245299	0.0001339624542894	0.000144020062008248	0.000186684673904031	0.000147605881047961
pos_638	3.29106301489375e-05	4.3459447825067e-05	2.95586120877549e-05	4.9573935638887e-05	3.88160869544015e-05	3.46011288470141e-05	4.41158442117613e-05	4.20628224343153e-05	3.57148314498279e-05	3.39589445873807e-05	5.57783476239294e-05	3.95806666982588e-05
pos_2825	9.60520915279789e-05	0.000117437198936782	0.000122736919689441	0.000133991582620556	0.000101953712207757	0.000109725536284839	0.000111069434695938	0.000111365521375697	0.000110689307948017	0.00010277681828228	0.000119711809032517	0.000121557204813883
pos_147	0.000207236047757252	0.000257736506065935	0.000312166985305371	0.000371931292327055	0.000185098932974272	0.000286686212893575	0.000236633200174777	0.000264588710186816	0.000232549643525521	0.000215253514544818	0.000319044609836735	0.000353301359319051
pos_962	1.37497305787657e-06	7.38576730759744e-06	1.36643108961613e-05	1.57386726148977e-05	1.06108851467168e-06	5.73247937583997e-06	4.09713901654321e-06	6.95809731845748e-06	9.59277784997712e-07	9.39615393678798e-07	9.28663080321125e-06	1.25299270369962e-05
pos_1391	0.000205081204713271	0.000306509382455052	0.000350954639181389	0.000437252477602177	0.000286903720769829	0.000316237246173316	0.000357878490225375	0.000336685785197329	0.00028677026593061	0.000280845161155917	0.000403070812608325	0.000437396613291853
pos_910	3.32796033588517e-05	3.6100069324349e-05	4.2686932497578e-05	5.36142335643694e-05	3.89656418357747e-05	3.97200360665068e-05	3.96272951813721e-05	4.248580066701e-05	3.48671950185528e-05	2.66255875119515e-05	4.91347732326888e-05	5.20578349059701e-05
pos_2293	1.95469888525595e-06	3.870862549684e-06	9.44316851058118e-06	2.08102465929921e-05	0	7.08722107827583e-06	3.54259514520193e-06	9.88976754617904e-06	3.09974603473294e-06	3.5031437361142e-07	1.29945847513896e-05	5.26423191687025e-06
pos_383	6.50713347134789e-05	5.59899186219032e-05	0.000146759291954196	0.000249500090178977	7.82064243481126e-05	8.52138208534187e-05	7.04071412876651e-05	8.96320722226019e-05	3.70254681797984e-05	3.53221191939252e-05	0.000134197248455698	8.79829125195698e-05
pos_1297	0.000203914155447108	0.000175582827115808	0.000421874467468651	0.000846123042744953	3.86774362113439e-05	0.000252174168424208	0.000103642392599656	0.000248702586465807	6.26513655319519e-05	9.7484462176299e-05	0.000395912160540605	0.000201752467597731
pos_371	6.4295141882521e-05	5.24214958728056e-05	0.000129118348798017	0.000316578245827684	1.47179729685711e-05	7.71677654027036e-05	4.28690009434657e-05	8.39501447574635e-05	2.156959022398e-05	2.93967940141922e-05	0.000135088668987694	7.57951537277177e-05
pos_2489	5.19472041063166e-05	5.78064296333908e-05	9.93609130563438e-05	0.000190239810809849	2.81691083005288e-05	6.36382801682552e-05	3.97670132466415e-05	7.18706418208083e-05	3.37345697137391e-05	4.06229531882351e-05	7.38099588744685e-05	5.47776101432955e-05
pos_640	1.33758810326036e-05	1.39387493985922e-05	2.72821342987871e-05	4.91867262724236e-05	9.2325236914094e-06	1.5449640511643e-05	1.14303637948131e-05	1.66312087371746e-05	1.08503353873641e-05	9.64215162306611e-06	1.72509008491131e-05	1.43457224083969e-05
pos_372	2.08130906329061e-05	1.69536781912437e-05	2.5595462220891e-05	3.00001391696643e-05	1.31336322601156e-05	2.01760359118202e-05	1.83507975389231e-05	1.92696705889044e-05	1.85448706953731e-05	9.36076993521142e-06	2.49767232122401e-05	2.10486022083342e-05
pos_2395	3.5551676172132e-07	1.6704949803189e-07	5.93896078310064e-06	7.93425257478883e-06	6.43388826116455e-08	2.72959386393825e-06	6.56298279145969e-07	2.99760119791676e-06	1.93490966756571e-07	2.78396700780416e-07	7.77726400864349e-06	5.02318284092798e-06
pos_1169	3.52334022937249e-05	3.74662998881151e-05	9.02929485547147e-05	0.000139376879512194	2.95488721811823e-05	5.38055243073749e-05	3.74731015696618e-05	5.03456419622985e-05	2.61448164987287e-05	2.49600123750229e-05	0.000118525344119826	6.61926775162656e-05
pos_1696	5.95306119265903e-07	2.1837075428064e-07	1.4314947566839e-06	3.07128675833908e-06	8.37985276855478e-09	5.8528271930074e-07	1.35545632577128e-07	8.28763233833851e-07	1.25693388165942e-08	7.09684337742579e-09	2.05051050762454e-06	1.30750998154206e-06
pos_405	4.36367261994956e-05	4.17656988202881e-05	3.55275573329625e-05	4.50433655415199e-05	3.47997135597514e-05	4.04648385413501e-05	3.98940738458123e-05	3.99991833890013e-05	3.99286927632274e-05	3.50258396767062e-05	3.96797693781415e-05	4.20968314871363e-05
pos_1714	0.000139259416459181	0.00014478183124908	0.000130859305980443	0.000166412727785426	0.000131230049748656	0.000140715246726468	0.000147467977614299	0.000137263917647773	0.00013781714715075	0.000122272856051475	0.000147805661678119	0.000147358391702204
pos_422	2.58521127107266e-05	2.78299148828915e-05	2.17419909295774e-05	3.04311891117266e-05	1.94446332514303e-05	2.45933201597222e-05	2.55010528007207e-05	2.19238303024574e-05	2.5012240822681e-05	2.01900395796003e-05	2.78669970878298e-05	2.62953952830509e-05
pos_1325	0.000303669113240613	0.000305794179840574	0.000216386057733653	0.000322505435158013	9.56301147257149e-05	0.000265598092152241	0.000188733331174315	0.00017169334010077	0.000153894303978439	0.000106346235310959	0.000316664948751881	0.00040554955430879
pos_271	0.000457025537290329	0.000452455727347218	0.000273646249550384	0.000522297865305603	0.000124063015084409	0.000407026263554647	0.000281753506518555	0.000291483242470037	0.000319563285546615	0.000137599826622595	0.000510290085542277	0.000526616496348162
pos_725	1.74173157920491e-05	1.31579240636981e-05	1.15418552770605e-05	1.93793988712722e-05	1.18568925302823e-05	1.39513322811787e-05	1.26547877840605e-05	1.30974607090463e-05	1.05836329205182e-05	8.33744328291916e-06	1.48798621074007e-05	1.49055150338547e-05
pos_146	9.76625929954469e-05	3.86868543343806e-05	4.5595000836264e-05	0.000101716819404861	5.90603197597709e-06	4.65300654160622e-05	1.9084844394594e-05	1.98022489013428e-05	4.7513502483356e-06	3.08347191768599e-06	9.24082529346755e-05	6.13341037351045e-05
pos_187	3.4978166851647e-05	1.76177127601099e-05	1.52575685264162e-05	4.81004718336389e-05	2.11893756682834e-07	1.39391178041244e-05	6.43075667347016e-06	9.2403979987654e-06	1.53408116321071e-06	1.00520447467019e-06	2.59090717553542e-05	2.72738989053438e-05
pos_145	2.28982074371825e-05	2.90895867919958e-05	2.01210731200835e-05	2.95228188180133e-05	1.99496003966507e-05	2.64766459691888e-05	2.44689026269598e-05	2.62647899278384e-05	2.30648703536848e-05	2.21747618872663e-05	2.99978350687773e-05	2.62308571327497e-05
pos_214	0.000162445420980072	0.00019410122488313	0.000155517941910136	0.000214921423441532	0.00012484754206369	0.00016417816225023	0.000159678556479845	0.000172520967185662	0.00014539364089437	0.000162370474356943	0.000210469640762885	0.000183901928946569
pos_1203	2.11339601041437e-05	2.47872019802938e-05	1.90025810602068e-05	2.61026812283933e-05	1.80913438146229e-05	2.23510862224258e-05	2.17193507340687e-05	2.11896698499266e-05	2.05151027219585e-05	1.96867786161383e-05	2.64119332214224e-05	2.17461099646628e-05
pos_368	0.000637793324800147	0.000815047057242882	0.000553772504109584	0.000859767285689322	0.000502963204211478	0.000640277872868276	0.000642569331757944	0.000649861723269564	0.000567290442327044	0.000628217765923623	0.0009667751645386	0.000701935447058828
pos_916	6.12366310812763e-05	7.13698984929063e-05	9.63774140900636e-05	0.000159036711902984	3.97453604245002e-05	6.94307313074564e-05	6.65507454727626e-05	7.16260949677322e-05	3.92891298862505e-05	3.34680579785757e-05	0.000117912415507811	0.000115041768223428
pos_676	9.85196592743929e-07	1.97905756833367e-06	3.48543672797283e-06	6.70623665968904e-06	6.43161216397332e-08	1.87256958030991e-06	1.42357353471531e-06	1.70870117717297e-06	5.14736132543853e-07	1.24775303634512e-07	4.39697708606564e-06	3.76869238880342e-06
pos_979	3.25741807967988e-05	3.61698704939995e-05	6.16864709398326e-05	0.000103023115257234	1.78873448794949e-05	3.69437341778515e-05	3.38829486612197e-05	3.853315989676e-05	2.53516795954673e-05	2.2540808849378e-05	7.6235431930791e-05	6.38941714644171e-05
pos_1734	0.000120289679109441	0.000129352610952777	0.000176681802840507	0.000495184406677385	1.94345220119232e-05	0.000156832984712659	0.000120300952077259	0.000146619171073995	4.39285279552157e-05	4.22464584467693e-05	0.000310030048763818	0.000238236891895102
pos_47	0.000281492842175376	0.000294866458579958	0.000434267283705221	0.00129570960834289	4.42386061179222e-05	0.000364864425490376	0.00026179680398123	0.000343344109525845	9.08915583903242e-05	8.64223692664398e-05	0.000788621258119985	0.00059806613420896
pos_2389	3.92673517754288e-05	3.42682552337498e-05	4.97297470588419e-05	0.000119904743673666	2.96122152014469e-06	4.46379031652351e-05	3.27533148538371e-05	4.53976605161347e-05	1.07473454893288e-05	6.53516203681906e-06	8.98784970002413e-05	6.23175371054809e-05
pos_574	0.000147711094742385	0.000155678060160215	0.000226105004280835	0.000569798735372742	9.90552493746298e-06	0.000187451993339507	0.000124874966209826	0.000192326958065645	3.84992970706408e-05	3.16419911544724e-05	0.000406967216003716	0.000293138075515805
pos_2618	3.94796039663737e-05	4.60367103498759e-05	3.31320328123671e-05	9.77294304411927e-05	8.575384793412e-07	3.85274315819764e-05	3.03082043374877e-05	3.34199538101225e-05	9.09911195104772e-06	2.16336170030226e-06	0.000115270658030935	7.05686370405747e-05
pos_2634	6.85942659891695e-05	7.12554438325447e-05	6.92089360744615e-05	0.000168145755344103	4.14177190649448e-05	7.53648552958747e-05	6.80410020010183e-05	7.65361113580924e-05	4.54871671921662e-05	4.43811632564306e-05	0.000157101738795084	0.000135872160632909
pos_848	0.00013874988057756	0.000138182257496163	0.000131260382016368	0.000246875310960605	8.81575379608079e-05	0.000128426185928342	0.00013549232694689	0.0001400354179788	0.000106596057879268	9.44796493354947e-05	0.00021851280929365	0.000199321866632618
pos_608	1.51568781686621e-05	1.39337354236216e-05	1.50277475919411e-05	2.68899077647433e-05	5.63111548052124e-06	1.71251255805117e-05	1.08292444128517e-05	1.5492886200473e-05	7.64044759017959e-06	1.91340690458924e-06	2.2895045502489e-05	2.13508403830799e-05
pos_1363	5.64151332686819e-05	5.44113921284071e-05	5.42766070013896e-05	7.59268065483188e-05	4.74176287445445e-05	5.27275393890799e-05	5.54502446676625e-05	5.8976468293509e-05	4.02058227496322e-05	4.24018095365618e-05	7.05899073762935e-05	6.97515453303567e-05
pos_163	0.000154677524274375	0.000141002155800252	0.000149436927734999	0.00021802410902794	9.47509082247864e-05	0.000143293699323823	0.000128508465401547	0.000149826536592861	9.04179474058488e-05	0.000103563951814578	0.000212425013112057	0.000164095730975772
pos_454	0.000233691733241036	0.000184185974719178	0.000212840588888881	0.000525847530029166	3.33415083944579e-05	0.000166765232057221	0.000144680563476355	0.000190144285639721	5.48581236413385e-05	7.92227490738707e-05	0.000407218776445279	0.000318494653108618
pos_1379	7.77392250774873e-05	9.40483606809514e-05	9.04932048430892e-05	0.000123298862162946	2.06119197202191e-05	0.000100048525741076	7.04253314938337e-05	9.28658533688427e-05	3.19403944603029e-05	4.2996249554783e-05	0.000122511097266598	0.000102567568741046
pos_2428	0.00027214336625764	0.00029299043374777	0.000249325528619522	0.000328340014645593	0.000184490260103581	0.000278800024275103	0.000255268544428027	0.00028211862711226	0.000185080990828676	0.000209093480443328	0.000371652551359969	0.000295460885520611
pos_695	0.000100248153614844	0.000122099226044064	0.000104543163428318	0.000219573565190007	4.3820602727619e-05	0.000121333645509616	7.23876654347946e-05	0.000101676382716112	5.42367113504641e-05	5.26930889685398e-05	0.000174707872634489	0.000150367602818436
pos_2263	0.000168472724004162	0.000227200949640248	0.000237650772459535	0.000532250870596888	5.27064021882792e-05	0.000312586939467875	0.000174812458794954	0.000263374911958564	8.1073879064522e-05	9.51785087096436e-05	0.000391661418165005	0.000329645299167421
pos_2556	0.000158029336247826	0.000190629821561473	0.000177463043482129	0.000393697148849041	5.09562698142763e-05	0.000243488389945332	0.000157029697172116	0.000217798543384647	7.30191321841535e-05	8.33617521256331e-05	0.000343972929746201	0.000282236612994075
pos_1973	0.00019423090985256	0.000405423257382851	0.00043766608189136	0.000886390488592457	0.000104493076956339	0.000389303816656001	0.000345185845794915	0.000450961676865976	0.000122468366594471	0.000132716548729562	0.000831139553270019	0.000584904287658363
[truncated: 851 more rows]
