# Supplementary material for: Multi-omics analyses reveal that the gut microbiome and its metabolites promote milk fat synthesis in Zhongdian yak cows
Source: PeerJ journal article supplement (doi:10.7717/peerj.14444), 2022-12-02
Supplement: biomarker_Web_Report_.zip [file All_metabolite_profiles.xls]

#ID	H1	H2	H3	H4	H5	H6	L2	L6	L1	L4	L5	L3
pos_1	0.000143373613404701	0.000280516099889959	0.000224718909490409	0.000254417617725337	0.00016750424081482	0.000200086248543327	0.000139869306485217	0.000141074891906182	0.000130812981686961	0.000127429588182838	0.000157863228276111	0.000124289239886146
pos_10	0.0271025015361995	0.022745320979762	0.0670788851770679	0.0597087546104036	0.0754371883493432	0.0578048511713294	0.0490250201416075	0.0440506703924097	0.0684691105283223	0.0536639780874919	0.0570077802127478	0.0520879671705176
pos_100	3.39668072962394e-05	4.77892415245145e-05	7.52120583590671e-05	0.000224025674881867	8.73793923402068e-05	2.03705463933448e-05	4.8823197771671e-05	3.2263567000144e-05	6.93457125590401e-05	4.25746516619048e-05	0.000130961626000574	9.17680508017233e-05
pos_1000	0.000923806234985915	0.000463087908401238	0.000410119036086324	0.00040159160998322	0.000476206062915908	0.000493218711631254	0.000509510990697741	0.000487006349781475	0.000460741887322162	0.000435062366240488	0.000467326727086756	0.000474187485748591
pos_1001	4.01384358402482e-12	3.9576159497502e-12	6.57739001429416e-07	0	0	0	2.40099525812225e-06	2.22730488235693e-06	0	4.64508343563833e-09	1.20430046582174e-06	0.000485108730413289
pos_1002	4.53350425687984e-06	9.75242210291292e-06	8.47109894285107e-06	1.02142773637819e-05	1.21264494948e-05	9.52843959345179e-06	8.35859896511495e-06	9.45917829860012e-06	1.02390284793562e-05	9.27516222460088e-06	7.36279430579978e-06	1.0737592159788e-05
pos_1003	0.00026366640565466	0.000202893278554169	0.000180401894400444	0.000173868741781195	0.000181821552691564	0.000196281611761064	0.000208573667764698	0.000196480787650124	0.00020561505916938	0.000182802184655176	0.000190343364900372	0.000193710422490535
pos_1004	0.000327490794697234	0.000315296315648543	0.000403287167075199	0.000205049280907728	0.000181584705302854	0.000259374678213042	0.00016032175080653	0.000265785271783621	0.00039475618961812	0.000193419478373732	0.000285777252556653	0.000411026873674963
pos_1005	7.27384813662508e-05	5.06632478351181e-05	4.66893124317539e-05	4.74674269697067e-05	3.34830463533819e-05	3.23635637828467e-05	3.76905549919153e-05	4.30996677093678e-05	3.10740657141884e-05	3.51713540738406e-05	3.54024016204916e-05	3.0586890091983e-05
pos_1006	1.72745918968914e-05	2.47177461398509e-05	2.27768189119798e-05	1.84247640538446e-05	1.53026882583098e-05	1.85653416621923e-05	1.68719669039963e-05	1.80124418692465e-05	2.20337767924986e-05	1.67980938319025e-05	1.85996129911411e-05	1.57316370359164e-05
pos_1007	0.000196979699388231	0.000200310234098613	0.000183365212790727	0.000165943433760962	0.000158517170678757	0.000190478596602469	0.000176210202172162	0.000180250520336071	0.000189487228029412	0.000175811633231088	0.000183338783203375	0.00017458366169039
pos_1008	0.000142653956932748	8.72088866303195e-06	1.04118572430884e-05	9.10522179364048e-06	6.12985367675102e-05	5.08121153938634e-05	4.37900442346611e-05	2.23778429359536e-05	1.40803454408975e-05	2.79843707502444e-05	3.04005617349897e-05	2.04188469745136e-05
pos_1009	0.000130567132300891	6.53539738190708e-05	5.42750682991678e-05	5.12001162243997e-05	8.59789527535932e-05	8.35458509062857e-05	8.35168750835916e-05	7.33718251360655e-05	6.81885946387154e-05	6.42461891698447e-05	7.24074750376975e-05	6.30756837493085e-05
pos_101	0.000218844998153951	0.000283005428505909	0.000241268861184055	0.000259448116643435	0.000196857544018961	0.000235037786833169	0.000222024530905838	0.000227157492014482	0.000254989501805454	0.000237195932263134	0.000235600251803542	0.00023038271458957
pos_1011	1.02634560807322e-05	1.56398481226908e-05	9.36898363307684e-06	1.24012646877024e-05	1.74441928975579e-05	1.17357847045627e-05	1.18026347276937e-05	1.11112141878373e-05	1.29025062641266e-05	1.32517570750664e-05	1.07573074468865e-05	1.34581563554048e-05
pos_1012	0.000129268442310593	0.00014164509497671	0.000101915934954295	0.000105425743673157	0.00022160111000702	0.000116664968544212	0.000166848524208239	0.000153487108197949	0.000178843486427081	0.000132189139822453	0.000142588787132708	0.000143473454137317
pos_1013	0.00023957760883478	0.000336998962200162	0.000224990212454456	0.000535031412238406	0.000300744223137582	0.000332302368057264	0.000187323065049999	0.000263334244137771	0.000622073540974261	0.000373149085909829	0.00036937799320492	0.000353661978446681
pos_1014	4.37299840012898e-06	1.12810205371654e-06	3.07986457919072e-06	1.84034817413664e-06	1.46172732824887e-07	0	2.04544548982886e-06	0	3.15696813997665e-06	0	8.62691129430312e-07	1.63600205982887e-06
pos_1015	6.60150270610574e-05	8.05127870043297e-05	0.000114183785426355	5.55116393512457e-05	6.81076963838517e-05	7.32266006934514e-05	4.87484712011346e-05	6.94523374467758e-05	5.94118478793743e-05	0.000117603899395477	7.8047810888355e-05	9.21345724874752e-05
pos_1016	1.70970709138999e-06	1.17544913988774e-06	3.00076340529876e-06	6.8328783204821e-07	2.10228488865334e-06	1.38518669456126e-06	4.56565857708574e-07	6.86109385224535e-07	5.26378196677087e-07	5.94116154509174e-06	1.70142465147202e-06	2.46511636008939e-06
pos_1017	0.000197631208990756	7.91304040780834e-05	0.000212285799860619	8.33473322646422e-05	7.70840802711044e-05	9.56980163979704e-05	8.39818671919653e-05	9.53021572679631e-05	7.5459557798376e-05	0.000130972154679974	9.46887785304565e-05	0.000115368586481174
pos_1018	0.00011567053295177	7.20058131103287e-05	0.000100220916383672	7.37978102172504e-05	7.61088800513174e-05	7.99836207724934e-05	9.70593884024652e-05	9.76318945493499e-05	7.5373485159326e-05	9.85552802862361e-05	8.43031729508929e-05	9.70642213696361e-05
pos_1019	0.000147809485138006	0.000248899361063524	0.000180268402874634	0.000169850298601026	0.000177614021224948	0.000159383913203389	0.00017261692787171	0.000167745855211777	0.000206922018130803	0.000153561557838801	0.000140557428464811	0.000266592041189631
pos_102	1.45481436537097e-05	1.82179286117428e-05	9.8759297569512e-05	0.000297473347623487	2.07959488898238e-05	5.43385413474046e-05	2.16957315160989e-05	9.58601595748861e-05	1.27949870047946e-05	1.76429735909797e-05	6.04980849726973e-05	0.000248155857441198
pos_1020	0.000130515254435659	0.000136576528429339	9.86868794673674e-05	0.000124345562049056	0.00013974574587356	0.00013000532466692	9.67006130125323e-05	0.000102652883857016	0.000151865360049453	0.000119878110085546	0.000124409428177317	0.000118990999471144
pos_1021	1.53826395984939e-08	7.19218356952668e-07	8.60569223439073e-07	4.53994841015798e-08	0	0	1.01712286311919e-06	1.71049665724877e-05	4.31136470232878e-08	8.60230561575565e-08	2.48656980276972e-06	1.21621895831902e-05
pos_1022	7.88952842929272e-06	8.49016026475634e-06	6.5950092328667e-06	9.13162637975416e-06	4.12888314561963e-06	6.01474248247494e-06	5.6163545938856e-06	7.05735831314195e-06	5.58338101111197e-06	7.36721135427609e-06	8.4263373459177e-06	4.58247731302156e-06
pos_1023	0.00188466527979725	0.00467659207960052	0.00213749646637568	0.00196588754562336	0.00367339361712428	0.00283756381021971	0.00197145856971725	0.00215727760089143	0.00236979627014512	0.00325414620279952	0.00251666725247531	0.00197994318704191
pos_1024	7.95408355230361e-05	0.000136287085239189	0.000227185083441511	0.00014486077212907	0.000112209392958009	0.000132446524187877	0.000117745978646472	0.00019541351393701	9.39244518671275e-05	8.65885816035481e-05	0.000156795406691767	0.000912863528452739
pos_1025	3.31712095827085e-05	4.24179239581275e-05	1.38459947583294e-05	3.37056786855578e-05	2.9779773344249e-05	2.05954725566098e-05	3.70986910070258e-05	2.35992230274572e-05	2.20521897609213e-05	5.35145271190117e-05	2.5964880660197e-05	2.08005372583303e-05
pos_1026	1.26496819423674e-05	1.15753400944933e-05	7.29505368242742e-06	2.62656852047981e-06	3.19647613513613e-06	3.07482324843295e-06	0	0	4.76423958899552e-06	5.73888393949322e-06	5.65855175137993e-06	0
pos_1027	6.37607035005415e-06	6.3760944522566e-06	1.55219252327998e-05	1.35472748766896e-05	7.50157362108919e-06	1.0896199223601e-05	2.7518925262541e-06	1.56624226149819e-05	2.51956827626205e-06	1.54813399589345e-05	1.12406700387779e-05	2.56215701831606e-05
pos_1028	0.000335925392619886	0.000491701782245311	0.000374344931054307	0.00035607055681734	0.000263913325159958	0.000387462016191042	0.000398309458896361	0.000402576667104042	0.000422899241487336	0.000297541943475914	0.0004149926375508	0.000301941756381162
pos_1029	0.00170900231310066	0.000917489045291512	0.000883812339359156	0.000781236859343664	0.000973241299536761	0.00102815469571858	0.00107903433341381	0.000979933634195125	0.00100207129344455	0.000866043233923529	0.000960731683482896	0.000951781571227786
pos_103	0.000253641287489722	0.000627454603311231	0.000182075805204227	0.000236711438357549	0.000133778343427407	0.000299137794318512	0.000451983366397605	0.000205518026770613	0.000184075878059742	0.000222142348487212	0.000361691712134722	0.000135796396338343
pos_1030	1.50006194693166e-05	2.500343685475e-05	2.65159635352961e-05	2.11871145050238e-05	1.80390130283816e-05	2.21685974572231e-05	2.77348794845154e-05	2.70127601652787e-05	2.35002469005625e-05	2.1293966480851e-05	1.90571567842604e-05	2.0473473916051e-05
pos_1032	0.00524062172752608	0.00594276153487909	0.00550554738381607	0.00553578266534895	0.00443961360598091	0.00503802144734157	0.00447256771631958	0.00500483915482376	0.00581930663581306	0.00471871350224968	0.00507980218488596	0.00470490906251234
pos_1033	1.79760620797199e-05	2.57784588767777e-05	8.79106904868518e-06	1.43953389558529e-05	2.01152618894345e-05	1.6737677783045e-05	1.48698217802675e-05	1.38021768939549e-05	4.30252896156245e-05	2.1526083522143e-05	2.46666195805544e-05	2.02892492084095e-05
pos_1034	0.00089693260787426	0.00125388733205447	0.000678267918230677	0.00164604650860901	0.000735088087412063	0.0010463553227684	0.0011729876330823	0.000893781010032995	0.000715083172958179	0.00103939153409306	0.00088023195271656	0.000695585388653633
pos_1035	3.29815537642633e-05	1.42698449329147e-05	1.58153663943261e-05	2.00484653632003e-05	1.94747890727391e-05	2.05420892883088e-05	1.93886947255518e-05	1.88863075543529e-05	2.33390471447748e-05	2.01661658879195e-05	2.04420209543451e-05	2.05203808470549e-05
pos_1036	4.04685467791073e-05	3.31040638736945e-05	1.04396121130422e-05	2.75704117629626e-05	2.94162813958151e-05	2.46818120341552e-05	1.98238493376738e-05	1.38018582876664e-05	1.92815349281629e-05	3.72522925387449e-05	2.12441891596672e-05	1.46318229130821e-05
pos_1037	6.11900843656508e-05	7.11896943135269e-05	1.87811708489621e-05	2.60670889239992e-05	3.24662978750877e-05	4.07943492282159e-05	3.16565850810706e-05	2.42514713152644e-05	1.90325913036559e-05	3.00379859576685e-05	2.41745936623587e-05	1.68941038980148e-05
pos_1038	0.000270981688950648	8.45945156076044e-05	7.4616203637102e-05	6.45977245453701e-05	0.000158932039942592	0.000159941548848687	0.000147291553558647	0.00012309667651938	9.83127705511557e-05	0.000110439929644604	0.000119619409770769	0.000109928612167097
pos_104	0.000275545001922607	0.000297481899373465	0.000289622048872899	0.000274233222757969	0.000241125578671086	0.000264612452363184	0.000252826717742442	0.000272586432439615	0.000251636125132692	0.000281984393654512	0.00026428928610927	0.000275326482903984
pos_1040	7.83874230516209e-06	1.32057949160496e-05	6.49935365262856e-06	1.27859033210459e-05	1.08304882609944e-05	1.40586535633724e-05	1.09252006312268e-05	1.09920550458089e-05	9.93422330866367e-06	1.25904643474031e-05	1.49470807513284e-05	9.4973341927714e-06
pos_1041	3.05907624428032e-05	3.39704411351982e-05	0.000119758349790108	8.37984759495923e-05	4.15285105715499e-05	6.2424667479201e-05	0.000138254864072635	0.000107731696437159	2.33067561681828e-05	7.16130463190421e-05	8.54059145037519e-05	6.47272241650251e-05
pos_1042	2.38073706366802e-05	3.15346324626208e-05	1.90178501652335e-05	3.51624289122003e-05	2.87970028442047e-05	3.53810185779563e-05	3.48927632532693e-05	3.19153538720688e-05	3.1830993998298e-05	2.6364737581942e-05	3.51468647677599e-05	2.47076748620908e-05
pos_1043	1.49528463334129e-05	1.85454321130782e-05	1.83700704777963e-05	2.11531297895208e-05	1.56724643899687e-05	1.6882398136324e-05	1.79207832897366e-05	1.82507549532422e-05	1.75349572122101e-05	1.94224810346297e-05	1.72505345870155e-05	1.97517120085228e-05
pos_1044	1.16750803603863e-05	1.74041849493857e-05	1.58470883845763e-05	1.55457499249035e-05	1.43621862859223e-05	1.49516045430557e-05	1.25936573676898e-05	1.34719762888928e-05	1.77897620811349e-05	1.51711960971822e-05	1.62705380741971e-05	1.71135078766226e-05
pos_1045	7.3054960651191e-05	1.50242949698664e-06	1.44831518902254e-07	2.23022790559257e-07	8.75992347225844e-07	5.99732268142455e-07	5.86106733992646e-07	1.11809097899302e-06	3.9710502329982e-07	1.37294654883651e-06	7.36162590950042e-07	1.56562794991941e-07
pos_1046	0.000121914279679639	4.34258375184982e-05	4.01999203982618e-05	3.55609604720819e-05	7.8805713351428e-05	7.54037427049922e-05	7.84818249263588e-05	6.10434689114453e-05	5.52443279306352e-05	5.80299527459421e-05	5.95030908565949e-05	6.15957869410449e-05
pos_1047	0.000106684095280591	0.000111323525618239	8.69121051277265e-05	8.85622266420574e-05	0.000131990404978723	8.32228439425084e-05	0.000109674911445925	0.000191055941835352	0.000101551963976015	9.55689418410067e-05	8.65152051064008e-05	0.000131786455720573
pos_1048	4.05166412149602e-06	4.95019749289224e-06	4.48707564812494e-06	4.10440011067578e-06	4.11317627433434e-06	4.63741768143139e-06	4.56469262162905e-06	4.25400835658093e-06	4.97641098872676e-06	3.85511733014764e-06	4.4420061594083e-06	9.490464280209e-06
pos_1049	0.000134791036243688	0.000132298128344631	0.000126502125239268	0.000163141350875234	0.000157904095739051	0.000144757964596	0.000156027234307739	0.000147799865177536	0.00014058914522196	0.000149419229044028	0.000147110862476837	0.000155817190723342
pos_1050	3.05413245354179e-06	4.78830947158439e-06	2.94779821333209e-05	6.5600688612823e-06	1.56123685783382e-06	6.89497571708909e-06	2.98166526330824e-05	2.67377848591743e-05	5.1795548620942e-06	1.08121866553027e-05	2.11903416894288e-05	2.50637559369956e-05
pos_1051	7.235472780647e-06	1.77661218021961e-06	8.51425814103647e-07	3.82347619266298e-06	2.82432922456346e-06	3.92245308759846e-06	2.73199173761384e-06	1.89644771330146e-06	3.61854362311447e-06	2.71007949489542e-06	3.99634273557305e-06	4.00040334133602e-06
pos_1053	0.000377622751092367	0.00024374083359807	0.000221812722810056	0.000426373391695709	0.000491933272263962	0.000367733956907418	0.000483518032929507	0.000363545410655954	0.000168644014344577	0.000330362429322766	0.000311991908719469	0.000168908051351534
pos_1054	5.69997995278618e-05	7.47177204875475e-05	0.000124096641775704	4.26122010928391e-05	4.04167306961233e-05	6.02313836532509e-05	3.84132371728819e-05	6.47861547949556e-05	8.04637621646833e-05	7.60027141821194e-05	6.4313804244299e-05	9.6351813876898e-05
pos_1055	0.000264842635770179	0.00029094232585622	0.000194010216677286	0.000306926742897239	0.000177412652330676	0.00024319723052925	0.000183618251754766	0.000182325865224609	0.000203820898416213	0.000308720350218827	0.000216376193362925	0.00016395292846032
pos_1056	4.11006374474745e-06	5.877128266319e-06	7.27122116521195e-06	5.90479668295649e-06	4.73002107837413e-06	5.06780022314919e-06	3.8921768737568e-06	5.4961929984789e-06	4.87142827350352e-06	4.77756741257408e-06	5.32383788010287e-06	6.96429706786519e-06
pos_1057	3.57113202529351e-05	5.39616406115212e-06	7.21233539976199e-06	6.76813108145168e-06	1.96802930785152e-05	1.94792209586903e-05	1.85416559759462e-05	1.28829022980987e-05	1.09811893421723e-05	1.29074839303804e-05	1.34559738238059e-05	1.2214719856032e-05
pos_1058	2.11209365741551e-05	2.76998133988738e-05	0.000133949541380594	4.82801954081291e-05	2.78623617172906e-05	5.77249699886979e-05	9.95615975779274e-05	7.90604604235603e-05	2.48689226720371e-05	2.86097329984861e-05	6.16331586940204e-05	8.01655579499623e-05
pos_1059	1.62461122593232e-05	1.99073918968174e-05	1.89028051723122e-05	1.71402719856131e-05	1.45490464524617e-05	1.32522915911089e-05	1.48491285281678e-05	1.52688977357164e-05	1.76978895363328e-05	1.4463700509179e-05	1.67018873117699e-05	1.74435485424086e-05
pos_106	0.000141830648301967	0.000159877513935321	0.000249258399322105	0.000237653388025998	0.000251985950295482	0.000221803645428043	0.000208170969335697	0.000215631634365546	0.000235570024572302	0.000212218618308592	0.000219245484744823	0.000260934290521194
pos_1060	2.43199929846309e-05	1.25084416238952e-05	5.9454356726755e-05	5.604195120563e-06	7.00954897594608e-06	1.92277791159387e-05	1.51226318597512e-05	4.60217290882986e-05	5.94550073521482e-05	2.2454193507884e-05	4.47825968234503e-05	9.91541774393212e-05
pos_1061	1.31911265762948e-05	1.81224268231802e-05	9.86619563924405e-06	1.28268848210931e-05	1.13772257807579e-05	1.15977214567806e-05	1.30896540438401e-05	9.18338762931178e-06	7.58244055129016e-06	2.59216216750135e-05	1.12505769763983e-05	7.27046661870651e-06
pos_1062	1.98937896620918e-05	6.35303672962545e-05	2.97379404502007e-05	1.70416470523192e-05	2.45591872657214e-05	3.27378501633593e-05	1.33273430374733e-05	2.62779653633443e-05	1.49999959088291e-05	5.77467472167914e-05	3.15043265688175e-05	4.89034882978643e-05
pos_1064	5.58127523046011e-05	6.22016430072608e-05	5.66910247113692e-05	6.65220547301747e-05	6.27387756747094e-05	6.17502116698422e-05	6.62956306499126e-05	6.19526557237452e-05	5.46312564693785e-05	6.14406928879402e-05	5.93551273347659e-05	5.32608118475179e-05
pos_1065	0.000476443568174675	0.000528862192049414	0.000607797587199994	0.000444095255899901	0.000373715309317348	0.000417532075406124	0.000700744682964467	0.000626208795270372	0.000385047212255852	0.000595971791728165	0.000594726250361319	0.000337702726877087
pos_1066	0.000809367854853137	0.000796504721403142	0.000687937341581874	0.000513703242652272	0.00039336653218025	0.000581272001597639	0.000425968546430929	0.00100028256204726	0.000763608961560663	0.000692555379911259	0.00105314800324955	0.00126448301628163
pos_1067	0.000226223369723558	0.000147065998330439	0.000147966099856976	0.000136042311992654	0.000132917657056432	0.000126000240511002	0.000148426391208315	0.000125265946560295	0.00013004756865257	0.000119848894970489	0.000121700280385796	0.000123066284109277
pos_1068	0.000256315408306972	0.000467384706124616	0.000352274144028354	0.000303270718411685	0.000422923136947403	0.000337327107287331	0.000462868662184941	0.000431787108479591	0.000283156459695236	0.000274574382880544	0.000344745062895244	0.000349958961317058
pos_1069	0.00019012631339607	0.000189073327747081	0.000152261376143215	0.000181194660253643	0.000249811358353206	0.000187231039857354	0.000215401552400508	0.000199900093824618	0.000199708711226894	0.000188691673855588	0.000185905942233582	0.000152314984363187
pos_107	0.000151490010039457	0.000211260915116656	7.16071816742406e-05	0.000103305386915879	0.000102466999656699	0.000134213918630688	0.000260406503380859	0.000137893598976338	5.18515099828944e-05	0.000169091399700766	0.00013715045572474	4.37213602160968e-05
pos_1070	2.02453616612103e-05	2.1700550838048e-05	3.6253236876486e-05	3.91436800305081e-05	2.6621985381773e-05	2.7631231371766e-05	2.48250639533082e-05	2.64392643339594e-05	2.19882767187633e-05	2.20846782323623e-05	2.44250796653759e-05	3.19122158939323e-05
pos_1071	5.90089593573648e-05	6.82108549705032e-05	6.36604820308705e-05	7.07145080791977e-05	6.57869459843519e-05	7.14883622091864e-05	6.99545191003274e-05	7.86101463131096e-05	6.90957967183923e-05	6.67823083039699e-05	7.53861434366368e-05	7.1814292664596e-05
pos_1072	5.99389371988428e-05	5.50165872452064e-05	3.65361556875447e-05	4.03444460976603e-05	5.57250026429055e-05	4.85752372912038e-05	5.07791397237571e-05	4.9708740440557e-05	4.67247793521062e-05	5.13802913241004e-05	5.21211222822574e-05	6.22919185682759e-05
pos_1073	5.96503890331222e-06	9.85186204859414e-06	6.88259674573533e-06	7.88622271234797e-06	8.65184137415296e-06	8.04562355504655e-06	1.11270187582944e-05	9.08477593083803e-06	1.27405048068724e-05	8.4786020981128e-06	9.8469071217803e-06	1.46742998177055e-05
pos_1074	7.41246626883363e-05	6.30209587896793e-05	7.6604573052796e-05	9.55346294869445e-05	0.000112836711365787	8.50015428757227e-05	0.000141975325089897	0.000100832009255239	8.57165103864387e-05	8.12473920405083e-05	0.000103822166707404	8.53410898646764e-05
pos_1075	3.42658009668608e-05	3.61829149192699e-05	2.93476991371288e-05	3.76211291157617e-05	3.31849553628311e-05	3.73866626978872e-05	3.73073499524725e-05	3.36160818731272e-05	4.0337761902668e-05	3.90011510949411e-05	3.74717070930615e-05	3.22958507905294e-05
pos_1077	0.0100772326560888	0.0136151297478074	0.00987668440453529	0.0118528972552607	0.00796542522667326	0.0120770241814317	0.0122096116136428	0.0114217718921549	0.00888232041948897	0.010560858486968	0.0121256103539167	0.00761184382388798
pos_1078	0.000429671630750674	0.000170526039036574	0.000110252243989198	8.59901306632165e-05	0.00022735378676196	0.000218982469080407	0.000195742395904942	0.000167556552895359	0.000130972138286168	0.000153978294013791	0.000157237068157553	0.000142924880564021
pos_1079	3.07946144923707e-05	4.01110645253076e-05	4.33888662074285e-05	4.47438196116195e-05	3.4857537630565e-05	4.21815937718274e-05	4.60028511024693e-05	4.13993081395398e-05	4.13122601478002e-05	4.44303844599318e-05	4.33327653199249e-05	3.95087610353954e-05
pos_108	3.78775372116092e-06	1.82688113090293e-05	3.57014084103671e-05	2.0370241796344e-06	9.23534477713109e-06	1.09351704987591e-05	8.49582130333884e-05	6.2976908725647e-05	1.71236608976507e-05	3.84908284112322e-05	4.17430306845687e-05	7.69590820373692e-05
pos_1080	0.000205671062942439	0.000151397921924067	0.000248769758624607	0.000111950576707639	9.64819907105611e-05	0.000144366584022575	8.46359258154754e-05	0.000145253670917212	0.000238935285218082	9.45524965266186e-05	0.000158444785084034	0.000427374927766811
pos_1081	1.38639346664249e-05	3.46024532309961e-06	6.79214281852925e-06	5.29873849732072e-05	0	1.53633845157463e-05	0	2.28186124481502e-06	1.03863726550481e-06	5.56081043657279e-07	1.90508204404573e-06	6.24506821834786e-06
pos_1082	7.72436681914082e-06	5.77212411042449e-06	5.1208646200273e-06	4.68771791326203e-06	4.79907987979426e-06	6.06185117303307e-06	5.61928116122186e-06	5.80946092072386e-06	5.02492358592258e-06	5.35646762911605e-06	4.77932757289988e-06	6.16523289543051e-06
pos_1083	0.00235551463032745	0.00341165809646247	0.00505944210863012	0.00373293426472837	0.00232697166691747	0.00338554841617111	0.00381583706193539	0.00464236761803373	0.00417403503272438	0.00315293510489168	0.00442686937113818	0.00583910517955017
pos_1084	9.57631855856293e-06	1.39749129746319e-05	1.34336529147653e-05	2.30985608998526e-05	1.50685926124131e-05	1.57294189659119e-05	1.54944063392194e-05	1.46292748731029e-05	1.18354641529786e-05	1.28126796351198e-05	1.53153596341487e-05	1.84003657502491e-05
pos_1085	2.43903308982333e-05	3.60239900448318e-05	2.52747472328279e-05	2.83507358472855e-05	3.19221103502873e-05	2.87378333398314e-05	2.60012524182189e-05	3.02066046488444e-05	2.98336580654547e-05	3.38894340348599e-05	2.99671702921087e-05	2.81945111423615e-05
pos_1086	3.96353834726837e-06	6.71277070187676e-06	9.41857263518503e-06	6.81694841920746e-06	5.03068245011862e-06	6.38822379027588e-06	7.92841909838451e-06	6.08353300441985e-06	1.12923341496878e-05	4.23585775414029e-06	8.53512893355488e-06	5.14692809809177e-06
pos_1087	7.80644405300538e-05	0.000135269494208746	6.26963342866832e-05	8.5621692013966e-05	0.000115878860875204	8.98401119649737e-05	6.88038660247903e-05	6.76347063075463e-05	0.000125382611155969	0.000105747463116877	8.95006734654301e-05	7.68204472448298e-05
pos_1088	2.26265739660345e-06	3.96131447372995e-06	4.46835936187634e-06	1.2541344308847e-06	4.29698679763036e-06	3.07362252810833e-06	8.26785297774938e-06	4.92944987623281e-06	1.85808221680399e-06	2.76221726519672e-06	4.16349399814787e-06	4.02361528007517e-06
pos_1089	7.65698855760424e-06	1.41900294702073e-05	1.36305416207823e-06	4.39290733422478e-06	5.40339946003512e-06	3.63996885034775e-06	2.67242603534655e-06	1.67494870400126e-06	2.12659001542272e-06	5.94840317309045e-06	3.07367748450785e-06	5.86217773241514e-05
pos_109	5.76642073329297e-05	5.66529643482266e-05	0.000119815665977017	0.000107651681836772	0.000138369539419973	0.000103935077167936	9.02499663551588e-05	9.48566256793469e-05	0.000119014444993059	9.59629377293781e-05	0.000102414351168837	9.85139171833944e-05
pos_1090	3.89749162081281e-05	3.92726282854609e-05	1.63605619778763e-05	3.2591341187647e-05	3.34692201431646e-05	3.0735537792979e-05	3.12949710646439e-05	2.37348248760016e-05	1.92021975567236e-05	3.95544524420193e-05	2.8264547677999e-05	2.44610562191136e-05
pos_1091	1.75696915153705e-05	3.14949645694637e-05	1.64544514059761e-05	1.91109690762449e-05	2.63300397983134e-05	2.13289794650217e-05	2.24351982186845e-05	1.93717138763694e-05	1.92186147174324e-05	2.56613483427326e-05	2.01477374306232e-05	1.8223637975959e-05
pos_1092	7.14977686995547e-06	9.30338242779698e-06	1.62827032372552e-07	3.14979490949438e-07	5.61791181903807e-06	5.3263695338409e-06	1.69221391984726e-05	4.3660220099043e-06	1.1421920744868e-05	1.42980946645792e-07	9.73857669869703e-06	1.14818203561305e-06
pos_1093	1.42933039010433e-06	3.05192593619281e-06	5.15165623688812e-06	1.26225453010114e-06	1.29277253618395e-06	1.12511602897135e-06	1.02401960343051e-06	9.84106773636294e-07	3.09341004224328e-07	3.80840861187576e-07	7.82614102030438e-07	2.75770008607565e-05
pos_1094	8.95558216869551e-05	0.000109137806607339	0.000111233920960069	0.000140849449494431	8.23801980893444e-05	8.47044669545542e-05	8.81782702601784e-05	7.93709580857676e-05	9.32476229105806e-05	9.7455858850682e-05	0.000104634600741942	8.40825755182909e-05
pos_1096	6.97059379009096e-06	8.82416436862381e-06	7.33869270545804e-06	5.35188354301671e-06	2.57266876458473e-06	7.50615976033672e-06	4.10093553136026e-06	5.94746074923862e-06	7.79471130239226e-06	3.86645759580093e-06	6.79336496773085e-06	7.57344274390507e-06
pos_1097	0.000140286683351745	0.00016709267303867	0.000151522325007385	0.000148123294552938	0.000119040218748802	0.000130605438083034	0.000136654178525408	0.000145985097081291	0.000159518780344662	0.000141430562969018	0.000141245855012461	0.000137381942570948
pos_1098	7.02460324981086e-06	1.13052721499416e-05	7.93586077599539e-06	8.35754388439846e-06	5.66949130613408e-06	8.91701389460395e-06	7.39728927974189e-06	8.51153418171144e-06	9.4273529924651e-06	6.41236106448897e-06	9.09130623038826e-06	8.4916195554742e-06
pos_1099	0.000198608540701613	0.000153472507352637	0.000165361913492948	0.000107625960241052	0.000217508638735704	0.000184102689038013	0.000132324096121992	0.000149084632352314	0.00017518225452934	0.000135336151002151	0.000149811990007791	0.000196080947393376
pos_110	4.86935893708583e-05	6.95369741017906e-05	6.54676775662883e-05	6.53812813151344e-05	4.92239768212523e-05	5.36520858142986e-05	4.7276642951447e-05	6.05170668987901e-05	5.97552828726393e-05	5.28060527328542e-05	5.96050365416467e-05	5.65044764439405e-05
pos_1100	0.000348403837339213	0.000280366265856763	0.000408539559064586	0.000505773212758651	0.00058793819024831	0.000433524118633258	0.000301090542259615	0.000427113451534103	0.000513888875433055	0.00041382674643983	0.000469214020758835	0.000600349470391374
pos_1101	0.000376554780975181	0.000347596813525257	0.000127040415818954	0.000235565599602341	0.000402181536871603	0.000321049085193097	0.000175167601524036	0.000137995092024966	0.000194095616979737	0.000369473113207881	0.000199042838561865	0.000104396872529043
pos_1102	4.17826609103079e-06	1.2343519330315e-05	4.93544574096887e-06	2.1104414017877e-06	6.05881533456244e-06	7.07134039249448e-06	4.89751170458604e-06	3.54730352353346e-06	8.59151737455894e-06	1.19312306463555e-05	1.03722428993571e-05	7.7278223224841e-06
pos_1103	2.33144710307891e-05	0.000100573096788742	7.00542892026619e-05	8.21962207895589e-05	3.36432406352874e-05	4.22300861467842e-05	4.30936665999658e-05	4.64521608095571e-05	4.02417848417049e-05	2.02638922500499e-05	2.58301467075833e-05	3.42668655474869e-05
pos_1104	1.51847464137205e-05	2.3714761190215e-05	3.73206597040463e-06	1.89948814421773e-05	1.54653550351419e-05	1.36884069876972e-05	9.16652951424469e-06	3.88837308366332e-06	2.93370288136774e-06	2.53773336780352e-05	6.95040072269308e-06	1.98470096910529e-06
pos_1105	0.00802894209949478	0.00306693255619533	0.00283654525033538	0.00234284006369174	0.00361473611207225	0.00360471379228895	0.00388364126982978	0.00329642526713872	0.00317942922297111	0.00306515257830478	0.00331253585764484	0.0032705274509047
pos_1106	1.48309608401691e-06	3.7717309116365e-06	9.28578968775202e-06	9.68805848424686e-07	3.70749393628482e-06	3.58853850560766e-06	2.30100974847732e-06	3.29578918434069e-06	1.66150943007112e-06	2.19724539154711e-06	5.79069714071338e-06	3.9984441778844e-05
pos_1107	0.000417252134260373	0.000285253272032136	0.000273654475579724	0.000241455495777314	0.000263878477496856	0.000282729788503351	0.000302364826527774	0.000290480453869925	0.000282091505160416	0.000269369118546198	0.000276866804161708	0.000293018987018842
pos_1108	0.000221343588337577	0.000231350867734143	0.000310437504709171	0.000319160919013412	0.000252019133767807	0.000266960951232361	0.000325985651588932	0.000301838242901421	0.000271753427785651	0.00022194302997239	0.000280242476367214	0.000252808746057233
pos_1109	0.000467780380003551	0.000120557581392474	0.000121793393565843	9.94234514465586e-05	0.000264111947792101	0.000270202750779115	0.000236394691762213	0.0002118110683788	0.000155729816269607	0.000178885282087988	0.000194759842382242	0.000175242116450201
pos_111	0.00300536694767331	0.00287317947780359	0.0024631817672551	0.00356735876284141	0.00211097139637633	0.00278271686302296	0.00313293383483993	0.00322939376462565	0.00223801583863511	0.00339960244002344	0.00303257364417858	0.00292537918702298
pos_1110	0.00261119157726958	0.00119421857920501	0.0011072154675643	0.000973760660622241	0.00171342686552684	0.00170067363067146	0.00186587952420425	0.00145519318562285	0.00138065391212545	0.00136161529085922	0.00146959423021067	0.001479899465742
pos_1111	3.68700298951886e-05	4.36711143151978e-05	1.89431433666181e-05	2.78684382529368e-05	3.97009119435493e-05	3.14942863943825e-05	0.00104800478639478	0.00044738959164134	2.85653600017452e-05	3.17071074912861e-05	0.000302737116599381	2.3287784083775e-05
pos_1112	6.77034764234987e-05	0.000199503242433711	0.000113197627407317	6.12561653500554e-05	8.65168984283526e-05	0.000102883819629769	3.85361605420345e-05	7.83200041314213e-05	4.54812453062609e-05	0.000179776135777695	9.15499545411537e-05	0.000148823078189182
pos_1113	6.99532046500781e-05	6.94462005082805e-05	7.27930094738459e-05	7.04567381823745e-05	8.125182362927e-05	7.06058457743423e-05	6.83211200526863e-05	7.30215672613618e-05	9.48518186162534e-05	8.02868839081512e-05	8.27403261278513e-05	7.80319747376229e-05
pos_1114	0.000139887308165014	0.000156327255379418	0.000148411258153763	0.000141061048581078	0.000122653602883356	0.000142436192189861	0.000140566608155614	0.0001408078107194	0.000165643621269518	0.000137062501575508	0.000141061456907141	0.000128006357010359
pos_1115	0.0116257898999275	0.0131488642717179	0.0120538823347262	0.0111446662415583	0.00927481642302788	0.0103771866617167	0.00910210362427596	0.0101800268680763	0.0116963889010826	0.00938919024202001	0.0102229163609914	0.00946744352577267
pos_1116	0.000338852021423393	0.00020383752304253	0.000205733896018339	0.000207759096788693	0.000250177229786744	0.000195395653190675	0.000219284538445175	0.000302765803733405	0.000199569601447179	0.000239097655305419	0.000178564972444387	0.000225494797609368
pos_1117	7.99613042420407e-05	9.84664924173189e-05	9.02332922295829e-05	8.73042741896484e-05	7.39020915505291e-05	8.52521423628869e-05	8.46350356818322e-05	9.02908432093084e-05	9.20981677883024e-05	9.34448069613459e-05	8.90519554028468e-05	8.32993539662929e-05
pos_1118	8.58020868255383e-05	0.000103294663878938	9.13838619354542e-05	0.000103967252323942	9.53344354820337e-05	9.54624785657737e-05	9.59687544299865e-05	9.29520787556944e-05	8.58470345846735e-05	0.000104391523725997	9.55020449736752e-05	8.95953387513134e-05
pos_1119	7.32134153706363e-06	2.13452097940918e-05	5.26630187804305e-06	8.26771638220247e-06	9.12581753817921e-06	8.85557408903864e-06	7.89847011834225e-06	5.51255477622023e-06	1.01068734701599e-05	8.75526514705158e-06	8.43550830482454e-06	6.2563397242445e-06
pos_112	6.01415391333233e-05	0.000131747586482899	8.17747557657224e-05	0.00014190716213136	7.9042942086049e-05	0.000104040528510986	6.90257693794996e-05	8.73760345642211e-05	0.000206964308262416	7.52547751045857e-05	0.000152742794127259	0.000141495622725756
pos_1120	3.72094681091607e-05	5.84673907299818e-05	3.66921520925922e-05	4.6084716757116e-05	4.68834527389815e-05	3.85345558656832e-05	4.0914225485486e-05	4.08196601983785e-05	4.51073953877123e-05	4.88223530133163e-05	4.18790551012635e-05	2.83054114477801e-05
pos_1122	1.65948588385725e-05	2.78308373801605e-05	1.35583073022323e-05	1.43343709854028e-05	1.51104607376437e-05	1.39409874422138e-05	1.53706661499096e-05	1.11870432211643e-05	1.63928559579705e-05	8.60115055409808e-06	1.39566420908446e-05	1.23260315040459e-05
pos_1123	5.60765745920808e-06	2.12216575324237e-06	1.45832819164012e-06	1.35005777165612e-06	3.29609581388344e-06	2.04759010308574e-06	2.17214296713505e-06	1.35629491896643e-06	2.50961986237688e-06	1.47554508830827e-06	1.92264647165297e-06	5.22162436743991e-06
pos_1124	3.16992475366062e-05	1.73989049749822e-05	0.000183366365940754	0.000476829500493218	8.76193668648426e-05	0.000145990403408562	7.27474710592147e-05	0.000330713610661672	1.35173456853546e-05	2.31771690295756e-05	0.000218141383527701	0.000877607082103626
pos_1125	0.00381095036607501	0.00403521611338266	0.00371600337784222	0.00352513244755268	0.00282111122145249	0.00312373436888315	0.0026824840005579	0.00314700302186808	0.00349878381084893	0.00287484637814352	0.00309494237336883	0.00294072329005139
pos_1127	0.000284122315862938	0.000439178697424055	0.000234789331557595	0.000427814996000948	0.00036642503477518	0.000357659054770402	0.000559934531808377	0.000428727106197649	0.000432440428959989	0.000363195343851445	0.000453171014557383	0.000234476615781695
pos_1128	1.23250554389982e-05	1.69399771067969e-05	1.582401495655e-05	1.34977744508363e-05	1.49095384966467e-05	1.34011167263024e-05	1.7930277194757e-05	1.78366551089813e-05	1.55487727746986e-05	1.53698330271106e-05	1.61047057375462e-05	2.56768917624143e-05
pos_1129	1.51104462466777e-05	2.25253991540762e-05	8.67357509760161e-06	1.54023494951205e-05	2.21730229200184e-05	1.63984381364678e-05	1.91707303967034e-05	1.49879124301617e-05	1.26574669936424e-05	1.95293616848153e-05	1.72183793885763e-05	1.16486103263412e-05
pos_113	7.59913891908409e-06	4.03876118827933e-05	7.26499846841624e-07	8.50517912699751e-07	8.76331155561977e-08	3.00777569941681e-07	3.97003263777179e-07	6.94079648427177e-07	2.25883483501505e-07	1.29876554444314e-06	5.11563828792648e-07	3.43192494458743e-07
pos_1130	2.90570387738273e-05	2.87973609376459e-05	1.88618060688662e-05	1.94858454173233e-05	2.59397252245837e-05	2.27119592211572e-05	2.31502859121247e-05	2.12076415659828e-05	1.82904622729169e-05	2.35595518337223e-05	2.28694287896063e-05	2.35281474622392e-05
pos_1131	6.23874571125796e-05	1.02617891288301e-05	7.0759421750313e-06	2.5239081290448e-06	6.80651826173019e-05	2.82746672837383e-05	6.19867694682542e-05	5.86829021339649e-05	1.74685799221951e-05	0.000106095541287247	5.62905087017876e-05	3.8325855891683e-05
pos_1132	7.03650421149509e-05	4.80698628523893e-05	4.24548342221493e-05	4.42589598145811e-05	4.41580164442006e-05	4.56949921851893e-05	4.69726648132722e-05	4.84396873837109e-05	4.66904538360203e-05	4.8504777301827e-05	4.65408309641998e-05	4.71565564362917e-05
pos_1133	4.16938957993708e-05	4.3483998952872e-05	4.10149859993149e-05	3.53537382108312e-05	3.85768279915472e-05	4.08617090644012e-05	2.95133028410148e-05	3.75435339553621e-05	3.71797809782533e-05	5.28320332949445e-05	3.99828080276213e-05	4.30012938813296e-05
pos_1135	0.000111460767771895	9.48839835491075e-05	9.08262437363655e-05	7.95503210924722e-05	8.10656502145795e-05	8.80450874044308e-05	8.80273457404817e-05	8.9319423076233e-05	9.15076169598596e-05	8.42795701736856e-05	8.77557499777824e-05	8.87314301080973e-05
pos_1136	0.00012797224835355	0.000183101625081416	8.43552777705601e-05	0.000105063865685357	8.05523664038767e-05	0.000116179910723084	0.000127743084391693	0.000166082524328515	0.000117622743659662	0.000156538429151503	0.000154565350589436	0.000244564840102378
pos_1137	0.000116418634861374	1.98794122218047e-05	2.49497297635004e-05	2.51049798328565e-05	6.97442521018488e-05	7.29398998724739e-05	5.83592612988263e-05	4.24907457432618e-05	3.8473049213513e-05	3.94197160017706e-05	4.48043131147436e-05	3.78692521300802e-05
pos_1138	3.37406665788188e-05	5.42621412567624e-06	8.85400566269635e-06	7.10115578981515e-06	1.7850008927888e-05	1.81948714754241e-05	1.65510857245035e-05	1.44662932352948e-05	1.2502424900545e-05	1.06436489570425e-05	1.22429452810956e-05	1.26799818235e-05
pos_1139	4.91549039822314e-05	7.78231001790698e-05	5.04066395086156e-05	7.87428874656303e-05	4.70654619208365e-05	6.02093298775753e-05	0.000179488170271839	4.16674624583095e-05	7.61516256586816e-05	6.60173186837613e-05	6.75615977205772e-05	7.53934047928043e-05
pos_114	1.10732069209245e-06	2.59014230757853e-06	8.09291477016776e-07	2.62057201112266e-06	1.60859380685155e-06	1.64538471902959e-06	1.87860000070578e-06	1.25016957399187e-06	3.21281996425466e-06	3.18093650072597e-06	1.94239446494537e-06	0.000213845546092148
pos_1140	2.2901186222075e-05	3.0272290577616e-05	9.8877927459786e-06	1.00482930718052e-05	1.14103120878369e-05	2.04703569829563e-05	4.6891298583239e-05	1.3876221230749e-05	6.54238048184648e-06	1.65711829316501e-05	2.58303236804164e-05	5.27856590930183e-06
pos_1141	1.72535810088484e-05	2.5607171467383e-05	8.31919499750707e-06	1.77626953626292e-05	2.03288102216096e-05	1.50831721446601e-05	4.73858259215339e-05	3.1145888413144e-05	3.6666681758369e-05	2.53988822599635e-05	3.35311177847392e-05	1.32588457165065e-05
pos_1142	3.2615809818917e-05	3.60292019592936e-05	6.25403914675215e-05	4.31917720790492e-05	5.31229229463143e-05	4.84376994141158e-05	3.15311670743297e-05	3.39644574406476e-05	4.90673620473906e-05	4.71906010790507e-05	3.8942897480649e-05	4.24379806984463e-05
pos_1143	7.45195400458137e-06	6.70664798489389e-06	1.85788846995226e-06	1.71658318304358e-06	6.36832831399463e-06	5.25051210775874e-06	2.1367799335147e-06	1.36535314825349e-06	9.18290147686821e-07	1.30459372443255e-06	5.13156736766791e-06	1.34561322289143e-06
pos_1145	0.000102013880147647	0.000152492251334751	0.000407752578443822	9.12910474417522e-05	0.000181876562755282	0.000191998596943191	0.000220988191379428	0.000236587057216014	0.000112738624568061	0.000322449850516079	0.000384371970696536	0.000392483684688169
pos_1146	8.47239892865223e-05	0.000155847164350949	0.000143401406012619	0.000130384728874745	9.68454630025855e-05	0.000118961840770104	0.000103515328635137	0.000118042771719072	0.000135496642751571	0.000113086140570205	0.000121810563324284	0.000113360305802659
pos_1147	8.96548462783599e-06	2.02362385694286e-05	0	0	4.45196872364774e-05	1.31697119191229e-05	2.27399563169784e-07	0	2.64768061513801e-05	0	3.98258333199166e-06	7.26461297244015e-08
pos_1148	0.00020104773142442	7.4984878856135e-05	7.66539621135424e-05	6.60637051393494e-05	0.000125723395393402	0.000130840524541348	0.000122560342350822	0.000109910181933234	9.20818829296306e-05	9.86295659519886e-05	0.000102096119773093	0.000167010045114473
pos_1149	2.67649475323759e-05	2.8043185333518e-05	8.48594187551465e-06	1.23069515301275e-05	1.81491007307866e-05	1.14505992239769e-05	1.46363256260179e-05	1.44242793184093e-05	1.33265414602857e-05	1.01618175905275e-05	1.25482840767014e-05	1.65558279172854e-05
pos_115	0.00506188740020014	0.00536967912439326	0.00406019796121629	0.00530592904020369	0.00493869805917119	0.00497134095145947	0.00550036010334791	0.00483675853494804	0.00569455205229251	0.00517424344022865	0.00524502520519983	0.00414121041665525
pos_1150	0.000207613115783886	0.000185180540263676	0.000240533712572556	0.000255722475878777	0.000151575413079437	0.000214015643375558	0.000280175496118886	0.000278484596259226	0.000268864722093845	0.000184649679281645	0.000267203344635357	0.000313248453386198
pos_1151	4.70068569405083e-06	6.53219214955791e-06	1.79883462074518e-05	1.04757410864096e-05	6.76348696763214e-06	6.59214754729847e-06	6.14750064857477e-06	1.00631988580853e-05	5.83772009783282e-06	6.84443891330851e-06	6.81660772171375e-06	9.91840365328589e-06
pos_1153	2.18528060986624e-05	5.45436881692451e-06	0	2.90987740056424e-07	1.64633062837045e-06	5.05294929951965e-06	4.04306628669005e-06	1.1735699118844e-06	0	0	0	0
pos_1155	6.41637638040231e-05	9.49540066476692e-05	5.79661265875022e-05	9.23141099584598e-05	5.81576886457793e-05	7.61861389172702e-05	9.66554160328032e-05	7.93749891437825e-05	7.15845012550829e-05	9.91737868011721e-05	8.62579961548542e-05	6.98309031909511e-05
pos_1156	7.57635131255473e-07	3.7721006870286e-07	2.303363839234e-06	2.57409455984561e-06	2.71229015489524e-06	1.34339108536546e-06	2.13960544094797e-06	1.73335960087176e-06	1.30777119548321e-06	1.8942153058477e-06	1.91540687131701e-06	1.9518390898796e-06
pos_1157	0.000441134243019972	0.000661633500709085	0.000316031454755349	0.000506855039887657	0.000592816494814073	0.000470871235824212	0.00049127291294457	0.000385759024601094	0.000523410850766736	0.000503201263972108	0.000441354384224113	0.000344922253205908
pos_1158	0.00167354398457423	0.00170610866701526	0.00172242064773414	0.0016415314575875	0.00151676998908912	0.00174186385580735	0.0012472056205587	0.00159483573109679	0.00185589968652304	0.00141692985722118	0.00161095370815057	0.00184176502157113
pos_1159	0.00280774946773264	0.00320313011525535	0.00496570074758182	0.00226699347917109	0.00188405874891731	0.00286067585539471	0.00143027441120738	0.00321670608353567	0.0027899642333211	0.00121733153612624	0.00280803961239483	0.00596769047487424
pos_116	3.46106764447667e-05	3.43305429033652e-05	1.88028214463842e-05	3.45922918430992e-05	2.33561139709314e-05	2.67624397873465e-05	3.15861659630621e-05	3.20805753371542e-05	1.60144873594596e-05	4.87858759702224e-05	2.83737606502682e-05	2.39468904701266e-05
pos_1160	0.000487231045954051	0.000507813274749488	0.000173158597197415	0.000400538020043473	0.000249847994954624	0.000297753021899771	0.000241717017345679	0.000214434924352907	0.000143518336416612	0.000472881090668238	0.000256270912919329	0.000186320053002659
pos_1161	0.000334731008373767	0.000126364365919649	0.000113803236067314	0.000109484399267175	0.000158793011226878	0.000148430618618313	0.000178243671836602	0.000141546586336688	0.000130171629492069	0.000130786806833907	0.000139031145452527	0.000134985136835462
pos_1162	0.00016022154882097	0.000197319688761785	0.000156249457871854	0.000166298727663172	0.000177772311582501	0.000166845769563076	0.000211251558892516	0.000184778116373585	0.000240291484580454	0.000143066796086331	0.000188658447466419	0.00012449608555896
pos_1163	4.0330391202795e-05	4.57508328991549e-05	7.09559302630991e-05	6.24256012837863e-05	4.50187907730334e-05	5.34900303905838e-05	4.85884477477697e-05	5.37409279564555e-05	4.76990073017062e-05	4.32354813197675e-05	5.21823273738139e-05	5.99287901637545e-05
pos_1164	0	0	0	9.38222855853046e-06	0	0	0	2.54810904074486e-06	0	0	0	2.11442330509771e-05
pos_1165	9.72910895784071e-06	1.42217739365219e-05	1.6074157687488e-05	1.42935051796849e-05	1.05058109237541e-05	1.27157765188178e-05	1.0281122720025e-05	1.44283852437373e-05	1.34545587987123e-05	1.18322987420619e-05	1.48127799042924e-05	2.05088469744169e-05
pos_1166	1.54523656377695e-05	2.30353321215552e-05	1.93920862846525e-05	1.85197432520951e-05	2.30376297396652e-05	2.14101906417835e-05	2.08824165718144e-05	2.08019215723215e-05	5.7438009301598e-05	2.25539544085542e-05	3.08533291292342e-05	2.23292057192543e-05
pos_1167	0.000107331036752208	0.000131781555058187	0.000117861596532799	0.000119799557457828	0.000100130169239552	9.47796740869775e-05	0.000103147160278868	0.000114601138512599	0.000113038977622427	0.000100809889606698	0.000113299447059447	0.000122889704269997
pos_1168	0.000963512694833286	0.00100351216732148	0.000779589658603413	0.000687125002357326	0.000713153165304309	0.000765165104175288	0.000655533212288351	0.00072020720581387	0.000876762130938084	0.000713894341443796	0.000741441187960727	0.000704735400805731
pos_1169	3.52334022937249e-05	3.74662998881151e-05	0.000118525344119826	2.61448164987287e-05	9.02929485547147e-05	5.38055243073749e-05	2.95488721811823e-05	3.74731015696618e-05	2.49600123750229e-05	0.000139376879512194	5.03456419622985e-05	6.61926775162656e-05
pos_117	0.000319224355702004	0.000500199869520371	0.000250335235302967	0.000411703784645202	0.000396359370701674	0.000352159472519696	0.000375843887734663	0.000332756342991808	0.000438827696772404	0.000376745691050184	0.000359538603605168	0.000251030498066759
pos_1170	0.000171956897011215	0.000224558725044886	0.000280856172480143	0.000286387735323078	0.000179020414986807	0.000230103276014475	0.000268892118271439	0.000261846266401785	0.000199464139574081	0.000213131043437795	0.00024010197996104	0.0002440726672036
pos_1171	5.01115788628649e-06	5.3193014876712e-06	7.05906392484538e-06	8.53223326568722e-06	5.82932272762863e-06	6.43541383145748e-06	6.5855495334698e-06	1.0151030130447e-05	7.5998279758267e-06	4.72660452595878e-06	6.46026809507901e-06	9.30280746989828e-06
pos_1173	4.6725233567475e-06	4.03124956104254e-06	4.34089734338993e-06	4.88349552466205e-06	3.13382266253474e-06	3.99135745086751e-06	4.13212960573114e-06	3.83261952349001e-06	6.14087552629792e-06	4.21282328819459e-06	4.18313821267656e-06	4.90190422908859e-06
pos_1174	5.15321245560088e-05	5.77487442971125e-05	3.11544653659706e-05	2.93919591378517e-05	4.4500774628491e-05	3.44486126936039e-05	3.73109741983188e-05	2.77542519474266e-05	3.57716059074474e-05	3.80702370807094e-05	2.92121863400397e-05	2.30445573178113e-05
pos_1176	6.66875805786219e-06	7.44954550190186e-06	8.63624924448722e-06	9.88825141955328e-06	8.2494085322093e-06	6.28050202393656e-06	1.31304190694113e-05	9.35110685086418e-06	9.11592246827236e-06	9.80945721714828e-06	9.38974836625896e-06	8.00716960728467e-06
pos_1177	5.64328849183e-05	8.80198132548607e-05	3.51379079239619e-05	6.58382242530094e-05	7.79457981781084e-05	6.08135129909972e-05	4.78710808460535e-05	4.28211018465857e-05	7.8290253772601e-05	5.725663601693e-05	5.70419004385635e-05	4.24449523073203e-05
pos_1178	6.45386550613315e-06	1.28926497953856e-05	2.28749387987893e-06	7.25729573055605e-06	1.09200658830872e-05	7.27901679518629e-06	7.02222957314404e-06	4.85745675383886e-06	7.9762084661753e-06	6.24227986096052e-06	6.65840794369298e-06	4.39837109569169e-06
pos_1179	1.95033602417343e-05	7.37538413463455e-05	2.27409180382226e-05	1.73914194839274e-05	5.37996668210903e-05	2.9456582670697e-05	2.62925735688172e-05	2.13501452315037e-05	1.6158577987881e-05	5.56373898996237e-05	2.54468697752923e-05	2.36545107024681e-05
pos_118	0.000130709892398887	0.000308579475960313	0.000210894466875224	0.000259220620083501	0.000223465762720542	0.000230581417960194	0.000249136475925548	0.000189156860074903	0.000320615130899104	0.000169249936075886	0.000270073359849918	0.000182440355888007
pos_1180	0.000326569621825361	0.000320636273840527	3.22435747774862e-07	0.000112274177783131	0.000376152762860401	0.000211077003869773	8.73226451032093e-07	2.672021042301e-07	1.41789851109209e-06	0.000134511448926682	1.23058559592231e-05	8.35321758639335e-07
pos_1181	6.38540997188843e-06	8.69797085797087e-06	8.65570836067598e-06	8.52294538719693e-06	4.75608511426741e-06	6.14793079171506e-06	6.07690300366647e-06	5.83215717024448e-06	7.93923238371409e-06	6.21727125392358e-06	6.67991868069516e-06	6.79606276683937e-06
pos_1182	2.77438995365808e-05	3.25796969452639e-05	2.74541075018535e-05	2.24844143861157e-05	1.69917414841016e-05	1.43306927991166e-05	1.70329367851055e-05	1.4954831019804e-05	2.24233712535002e-05	1.70308439652936e-05	1.40731768496414e-05	1.63494054119529e-05
pos_1184	1.13147678862185e-05	1.57748100882483e-05	2.04048680462709e-05	1.53043780059665e-05	9.11228236566148e-06	1.59259234009478e-05	1.52227353247831e-05	1.37694732615305e-05	1.53986802890716e-05	1.50589009258112e-05	1.55297888975934e-05	1.35170953551426e-05
pos_1185	1.17628972188077e-05	1.92279821489656e-05	7.20876206235966e-06	1.14806579224712e-05	1.18727614289545e-05	1.0376791696216e-05	1.08712267400451e-05	9.59396101548244e-06	1.42061362744709e-05	1.67203906021446e-05	1.27584214581746e-05	1.18838231391143e-05
pos_1186	1.00344915669112e-06	2.63674617260979e-06	6.22450561546419e-06	6.27908554981337e-07	1.30758658211719e-06	2.34725421440534e-06	2.94223909325942e-07	2.38639173595499e-06	1.00435315318265e-07	9.78752525127604e-06	2.54187670002325e-06	9.23976695593568e-06
pos_1187	0.000209110797246378	0.00023994826332225	0.000228895965686212	0.000251404330226527	0.000206351446990471	0.000341816885626828	0.000233039266567345	0.000273994051316073	0.000208454926273643	0.000281855018191014	0.000297194034140286	0.000213472305723146
pos_1188	5.05307675124353e-05	5.05385497845603e-05	4.47738218199831e-05	4.6064129759449e-05	4.62093873094232e-05	4.72180022372575e-05	4.90635570364796e-05	4.45403396135036e-05	4.16330713943557e-05	4.55929806076963e-05	4.52721231546013e-05	4.00798112833955e-05
pos_1189	1.43709706159502e-05	2.99164123466321e-05	1.8655299851253e-07	7.79187537300014e-06	6.90046832370286e-06	8.28628871433116e-06	1.63979051229e-05	1.26588388217618e-05	1.16578047795421e-05	3.67745873409417e-05	1.50433487612291e-05	6.16439834750084e-06
pos_119	0.000172409947216234	0.000218346483538432	0.000213456325755737	0.000205149213162387	0.000166700000050388	0.000191979470120804	0.000182252058374789	0.000209132322269042	0.000189263163250823	0.000205295982412063	0.000203765423415896	0.000214618573468933
pos_1190	9.57324346709939e-05	0.000133461397572635	0.000193619274485094	0.000166142525401075	0.000108525518552379	0.000152496727479017	0.000103005353129861	0.000144251672416413	0.000108879503595463	0.000106423070163992	0.000138590192841285	0.000216237920605999
pos_1191	8.81785420039309e-07	1.03716539760797e-07	0	3.87049556188928e-05	2.49318155527821e-07	6.20085336290039e-06	1.37063108238134e-07	3.83447972477814e-08	6.45426134157477e-07	3.3606831067074e-05	4.12452507045952e-06	7.18416541189985e-08
pos_1192	1.75416392364577e-06	1.65518518203319e-06	6.77295444204834e-06	1.43413837309896e-05	3.79053709347649e-06	4.92323055837557e-06	2.4996315331831e-06	5.64335818124763e-06	1.38705541171489e-06	4.9162578972551e-06	5.62579401867548e-06	1.38089649954442e-05
pos_1193	1.25755117577039e-05	4.06400340502843e-07	6.56302637897225e-06	7.28933145519653e-07	9.75408685702034e-06	4.09114880872701e-06	1.28377994319121e-05	8.48222617949732e-06	9.17425573205258e-06	3.63963447847239e-06	1.19606263383936e-05	1.98381796981374e-06
pos_1194	9.47372036539313e-05	2.09013595582538e-05	2.33542062997844e-05	1.91717627562723e-05	4.90033873844317e-05	5.05083582002249e-05	4.82276989306768e-05	3.89726485320359e-05	2.87549541575747e-05	3.44207169622916e-05	3.75874967197057e-05	3.65917280815506e-05
pos_1195	8.00925281493265e-05	0.0001067172431558	3.92127875513909e-05	6.54323086112259e-05	8.14291686934893e-05	6.93814690118712e-05	5.23491349460536e-05	4.49385213106939e-05	7.70511486578844e-05	6.9921780486347e-05	6.31206987376127e-05	4.17883327700698e-05
pos_1196	0.00406042275329915	0.00157601417443791	0.00139526583965853	0.00127620455586174	0.00260934140790528	0.0026356874584959	0.00277889593437475	0.00206120868087667	0.00190879026492888	0.00201911150101793	0.00210499278755635	0.00208677787088566
pos_1197	0.0106368884850162	0.0105518052526958	0.0106950825080261	0.00932097206661127	0.00857811032230362	0.0101455526405621	0.0095803801950581	0.0101783383448625	0.0103758643356988	0.00906968688086284	0.00990403147157265	0.00970424927119713
pos_1198	0.000342272827744288	0.00024376518502065	0.000912872532294292	4.81850012599377e-05	0.000242465521814707	0.000308732795691025	2.04362796491063e-05	0.000192720483159707	3.78574891814208e-05	0.00129861022025365	0.000271073742372919	0.000520793153117441
pos_1199	6.25878855365323e-05	5.31058372403036e-05	5.64170580083998e-05	4.6141516747142e-05	4.96084790559978e-05	5.42254927266013e-05	5.56158816511819e-05	4.9690102763663e-05	5.61910413396207e-05	5.27975018922765e-05	5.10688115475977e-05	5.16844207757809e-05
pos_12	0.000371812854488535	0.000480574393653544	0.000353765727995651	0.000306175872046285	0.000503559273685996	0.000310580700323051	0.000378543400659467	0.000435501006544614	0.000386280193092769	0.00061293130214648	0.00035793589936024	0.000546282514999064
pos_120	0.00057658384549959	0.000332279293012875	9.98167349937268e-05	0.000248114843348025	0.000324707344172667	0.000253069277176471	0.000162963529955938	0.000123274947594184	0.000123212390438883	0.000215840701637864	0.000157430254546731	8.31983989788877e-05
pos_1200	0.000112454196172507	0.000143897676090168	3.24825321289872e-05	0.000116206217063481	0.00010346045139021	0.000101631029279653	9.96674156560633e-05	7.39741329467523e-05	5.77624317846522e-05	0.000115717016977754	8.06384090298102e-05	9.42791056991674e-05
pos_1201	2.49406551559252e-05	1.16105382223053e-06	1.36651848285784e-06	8.6627879199415e-07	9.83263340990301e-06	8.12634167804689e-06	1.14496850704128e-05	8.89919146711319e-06	2.1251823969744e-06	1.8140348010319e-06	5.05142442534705e-06	5.43970853663058e-06
pos_1202	4.58651798769956e-05	6.43882268553837e-05	6.19882652972679e-05	5.43414876849152e-05	4.59770147057022e-05	5.08335504653149e-05	5.51398458625842e-05	5.39381544496468e-05	6.17879773022642e-05	4.41009999140548e-05	5.28947931271143e-05	5.47872466502316e-05
pos_1203	2.11339601041437e-05	2.47872019802938e-05	2.64119332214224e-05	2.05151027219585e-05	1.90025810602068e-05	2.23510862224258e-05	1.80913438146229e-05	2.17193507340687e-05	1.96867786161383e-05	2.61026812283933e-05	2.11896698499266e-05	2.17461099646628e-05
pos_1204	1.72244956987785e-05	1.77801948055602e-05	1.81616907916737e-05	1.71872965971099e-05	1.46376610766885e-05	1.7658859978177e-05	1.69863165196673e-05	1.76414911637018e-05	1.59793806380109e-05	2.00138942751765e-05	1.82490370048613e-05	1.70243635171296e-05
pos_1206	7.27064369007252e-06	1.42939610549604e-05	1.24884891290246e-05	1.17328990151361e-05	8.9749711747386e-06	1.04669160986437e-05	9.66996525850471e-06	1.17467942485928e-05	1.22896722389786e-05	1.04929347351666e-05	1.12422895067308e-05	1.01098258739133e-05
pos_1207	0.0378001120221765	0.0164226100707242	0.0159910134296621	0.0139827933719229	0.0188551984654582	0.0198098868938308	0.020713899892171	0.0180980567695413	0.0185195088653322	0.0165624036232202	0.0178380463850451	0.0176888317465008
pos_1208	8.11568059747142e-06	3.82331506179012e-06	3.28052832232762e-06	1.52479123979369e-06	5.02321649782053e-06	4.81251205191058e-06	6.43588399893152e-06	4.59287671018415e-06	5.0220265463621e-06	3.98641552458347e-06	5.02746874715059e-06	4.78667827729612e-06
pos_1209	0	0	0	3.75332484477294e-06	0	2.65766938136049e-07	2.43383066350026e-06	1.277622722622e-06	0	2.11825078987818e-05	2.30164018934591e-06	0
pos_1210	0.0239125187953439	0.0405514462783118	0.0270830576579331	0.0273565230349164	0.0355509159582051	0.0305591326157406	0.0223420201161471	0.0272499275170894	0.0292650871941349	0.0356308210430733	0.029650640811362	0.0278621244798936
pos_1211	0.000174104116468933	0.00018838323546873	0.000263373137876945	0.000148265007912193	0.000182920841111364	0.000180727647742911	0.000130210238128672	0.00016851742195176	0.000140426444223453	0.000284654561680296	0.000176789562073087	0.000226592456305404
pos_1212	0.000974146211597171	0.000897064246290581	0.0007955980938466	0.00105349856170596	0.000729536475570372	0.00087132241235236	0.000953318817376734	0.000872557944304068	0.000634693927605113	0.000967605372137651	0.00085394081881542	0.000796117564478134
pos_1213	6.65758865645494e-05	7.55310277230213e-06	1.09730462532556e-05	7.58957807217e-06	2.7035266764841e-05	3.20194893393443e-05	3.19235002208992e-05	1.85366289893347e-05	9.76800080897671e-06	1.69228323206997e-05	1.41911726151981e-05	2.09806494500525e-05
pos_1214	0.000173130060294408	0.000218991172164207	9.0619762672661e-05	0.000162022083114365	0.000158496245686544	0.000149530729216108	0.000192661565698242	0.000153493436200468	0.00014649869225184	0.000175564771023193	0.000160053877145915	0.000137084353207465
pos_1215	2.74519273968644e-05	7.04107748450474e-05	2.84497431000411e-05	3.70599448406702e-05	5.38278588346377e-05	4.15665899158852e-05	3.8332004161351e-05	3.42311612210816e-05	6.25842827402732e-05	3.75165500771201e-05	4.07142522472441e-05	2.87006512446362e-05
pos_1216	1.03229778062465e-05	1.27569989535509e-05	2.21793283612695e-05	7.5466516699437e-06	1.18876614731386e-05	1.37762793985493e-05	5.63351898581675e-06	1.21198431968689e-05	5.84035204632501e-06	3.78569810483843e-05	1.22161202863824e-05	2.22299291596516e-05
pos_1217	9.06395076807128e-06	1.29118750872189e-05	1.1952858368598e-05	9.92857915432556e-06	7.60104666030503e-06	9.03246116885924e-06	9.07406107505502e-06	1.07364661622379e-05	1.10881490077738e-05	8.94566019761052e-06	9.61923895050197e-06	9.34733912384253e-06
pos_1218	0.0013244722464755	0.00101217075441263	0.0030907150975056	0.00344519819936599	0.00155186871121292	0.00211085677247863	0.00278587040486815	0.00300522327453124	0.00157508736788115	0.00186318225228101	0.00263259129534245	0.00326796412218832
pos_1219	2.81979153729803e-05	3.33497938078675e-05	2.74329525883606e-05	3.18827628577893e-05	2.51890096943184e-05	2.86816528686418e-05	2.93098359927693e-05	2.80298111615228e-05	2.97578288067171e-05	2.80732762260975e-05	2.83205081829568e-05	2.7547815663624e-05
pos_122	0.000744432693421582	0.00139284137338049	0.000722670538416346	0.000995175229361018	0.000849109847668764	0.000633091498444832	0.00225033079697748	0.00260738071814385	0.000779218126890647	0.000844113838468565	0.000722707450698383	0.000538536275679211
pos_1220	9.50233074890048e-05	8.01644476988885e-05	7.96064822127622e-05	6.58081309963895e-05	6.8175518591291e-05	8.06016540686159e-05	7.8214088094193e-05	8.1280591453114e-05	8.19658227193692e-05	7.50767370477914e-05	7.89732302249451e-05	7.31707755972831e-05
pos_1221	1.01553565482658e-05	1.53394458821668e-05	6.15877895837802e-06	2.86560387778068e-05	1.3040520144071e-05	1.51902160413273e-05	4.02188171482553e-06	9.81160848460546e-06	4.44356795723264e-05	1.44792622841412e-05	1.61918532730549e-05	1.50952640470213e-05
pos_1224	5.27584751086724e-05	8.67553092461363e-05	0.000179171679732794	5.33862509010606e-05	5.49310325729846e-05	8.03897269121016e-05	5.08409899363779e-05	0.000259250259446479	0.000253270141258379	6.49422172520781e-05	0.000124165948086115	8.06833479466078e-05
pos_1225	3.78911852012375e-05	3.55184979874749e-05	1.63597721319554e-05	3.02066592455512e-05	2.41401546664236e-05	2.68081211699761e-05	2.23310982261632e-05	1.98454065279401e-05	1.98482433498423e-05	3.83834962538582e-05	2.4988203840938e-05	1.89258918608982e-05
pos_1226	0.000202744528461997	5.30335711597023e-05	4.41139432231638e-05	4.29135181213593e-05	0.000113511631796722	0.000106607764333562	9.97647295786356e-05	8.38144433249028e-05	6.27210466527866e-05	7.28238024527418e-05	7.90986978772711e-05	7.20415973555153e-05
pos_1227	1.06856288332028e-05	1.71666484385848e-06	2.61211180807269e-06	8.55877555583779e-07	5.77012854597569e-06	5.26667509018376e-06	4.94650955083144e-06	3.87507241039423e-06	2.47527174518631e-06	3.2821512736514e-06	3.98962960217833e-06	4.45883495507905e-06
pos_1229	0.00011626163242678	8.96932270458001e-05	8.28434829739223e-05	0.000159788714577956	7.94082742365563e-05	0.000111318842078631	9.29557447745144e-05	9.50736826332742e-05	7.96341443515625e-05	8.70293348552678e-05	8.95858180071673e-05	8.79386341226224e-05
pos_123	0.000190584419882656	0.000159050504757414	0.000182537599705521	0.000190368100470689	0.00020454182101673	0.000184398375635752	0.000175888180242607	0.000187204361390829	0.000215858044604718	0.000160739511055567	0.000204973018838231	0.000188679522573335
pos_1230	0.000544332669163716	0.00048888523869062	0.00123449028547808	0.000833169182637674	0.000731794950336345	0.000711933429856529	0.000807697844768544	0.000955490214295763	0.000495654859072989	0.000679472192115623	0.00075435746246056	0.0011473890281302
pos_1231	0.000220156950249646	0.000398043036262886	0.000416473022537625	0.000386962631947701	0.00025290209752821	0.000330516098883709	0.000268364909778666	0.000321418311142168	0.000320091196143625	0.000294081695065719	0.000326569134706138	0.000378037478442783
pos_1232	0.000322283979409195	0.000294701936119664	0.000355528523281453	0.000317141597524994	0.000200430616309999	0.000309679760145413	0.000170442562183947	0.000271309761480326	0.000236198165949944	0.000434100889349508	0.000299512882663672	0.000508900733877194
pos_1233	5.28336628936216e-06	1.33146093109919e-05	1.63112533106235e-05	5.35495370896571e-06	7.9214646979517e-06	6.94377845767474e-06	8.31791640188218e-06	1.25314541666141e-05	6.18527830170169e-06	1.05352337359554e-06	7.03260740957289e-06	1.77978414849392e-05
pos_1234	1.73854149123221e-05	1.19095146915479e-05	9.52028845998836e-06	5.21041799458749e-06	5.79391805090507e-06	8.73075507730343e-06	1.14667854592764e-05	6.61069281763903e-05	1.00965430419372e-05	1.04807385877206e-05	3.89463068118819e-05	0.000112365518768835
pos_1235	1.48589202007149e-05	2.51138674708265e-05	5.19243094708861e-06	6.59816951931783e-06	2.99263188442984e-06	2.12948806554525e-06	1.07236752037211e-05	8.29178257943762e-06	5.80004288174907e-06	3.84968938332281e-06	6.06622203928355e-06	3.74240681996325e-06
pos_1236	7.95920540193564e-06	8.56464444417682e-06	8.91338995645133e-06	7.80364086874883e-06	8.21813897199378e-06	8.501382455938e-06	9.27591399812564e-06	7.25767990051907e-06	8.11135437315039e-06	7.49642118966452e-06	9.21918174995967e-06	6.56191653586186e-06
pos_1237	0.000393428503509828	0.00025214182307183	0.000317343727321993	0.000102802382292668	0.000196254986737796	0.00027269653254057	0.000187919416181553	0.000450486977041453	0.000285271270746657	0.000156338379220311	0.000357088945347356	0.000993366671710627
pos_1238	4.19309673041866e-06	3.21051517948193e-05	1.83742709214116e-06	1.69307114441672e-06	3.03516425763923e-06	1.2256680007008e-05	3.4574583835064e-05	1.11726822252722e-05	1.24676754001095e-05	7.48027749232234e-06	1.43071542890101e-05	1.22908408500751e-05
pos_1239	0.000169233132300719	9.19641506547501e-05	8.15113326120257e-05	8.19472131736676e-05	0.000109737777972239	0.000113494722942454	0.000121233551072285	0.000102509420748998	9.64479420710925e-05	8.97231374633736e-05	0.000100172514318797	0.000103303048265132
pos_124	0.000944136509828013	0.00100425267069513	0.000783231133227658	0.00118552052240655	0.00102718376732819	0.00103434031270918	0.000720395503365171	0.000968004232060847	0.00104673468587717	0.000934298921256409	0.00104092664270014	0.00111229433981143
pos_1240	3.88967345830555e-06	1.33615726966181e-05	3.41981749968606e-06	1.11241757334634e-05	3.21594093460237e-06	6.34202507584265e-06	2.01979521015085e-05	1.09491604923756e-05	1.81877034261182e-06	6.91936609180835e-05	2.40757810065867e-05	2.52476504513961e-06
pos_1241	6.40474668878078e-06	5.4275043755997e-06	1.77381825455426e-06	1.23599381832875e-06	4.43892150244346e-06	3.17792738853481e-06	3.97999287191784e-06	2.99268812382905e-06	2.48061825677569e-06	3.057057835594e-06	2.45960383250038e-06	2.99997305126388e-06
pos_1242	0.000253729221796327	0.000304215273023664	0.000270527076890444	0.000217691027623626	0.000343679019204951	0.00023504715892137	0.000349623906650789	0.000317875510526501	0.000301414835293382	0.000346407012910035	0.000277764968648351	0.000626951107535811
pos_1244	5.13335975554487e-05	7.05472930812631e-05	3.01405139716053e-05	4.2648790810515e-05	4.55448718442607e-05	5.08441724792163e-05	4.42019113522735e-05	3.53512036245618e-05	6.89212176761567e-05	6.7455348391231e-05	5.05690135460079e-05	2.79203489917398e-05
pos_1246	2.02898459363018e-06	1.24725359196909e-05	2.26931379182282e-07	1.58372526623925e-06	1.61974438810895e-05	4.96464669913431e-06	0	4.0953178913026e-07	6.47739268287377e-06	5.48207896692395e-06	9.91258494617116e-07	1.07475362888202e-06
pos_1247	1.88218697838874e-05	1.89444217785478e-05	2.28515494341957e-05	3.52157024132453e-05	9.99833150662132e-06	1.59698526925857e-05	2.15698022564588e-05	2.24014864392668e-05	2.390673330215e-05	4.58808658390273e-06	6.08334434442515e-06	7.99450142967156e-06
pos_1248	7.27937688743303e-06	1.91119367320607e-06	2.80738716624481e-06	1.07254822091939e-06	2.09961928551289e-06	5.61763743287234e-06	0	8.4742868203384e-07	1.09353927396022e-06	0	9.35717321816451e-07	2.08240165138295e-06
pos_1249	2.62968983836385e-06	4.41150192560898e-06	5.63090614321353e-06	3.6449387498287e-06	4.97797653238683e-06	5.72121314580859e-06	6.67223761888877e-06	5.65853649207721e-06	5.45775415226494e-06	7.24801579382881e-06	8.55070703871328e-06	5.15841637454096e-06
pos_125	0.000256160134123388	4.71827098438621e-05	0.000107154097990112	6.47918688738566e-05	4.99470015802263e-05	0.000106359715257182	0.000345987530630575	0.000121471365390295	0.000106020523426411	0.000120251929709865	0.000167803291459831	0.00056741406962414
pos_1250	1.75440657145956e-05	1.58229605070514e-05	1.57547045522289e-05	2.70927339743539e-05	2.08618820619726e-05	1.83695402777165e-05	2.54804544408265e-05	1.91631539647252e-05	1.7347378926386e-05	2.00871276946789e-05	1.98629543647338e-05	1.7214925456892e-05
pos_1251	0.00366670270108889	0.00795256350489812	0.00235193312388676	0.00080558790094079	0.00157232206628091	0.00297783730389027	0.000502131894403779	0.00143644885750896	0.00185081996234674	0.000404693316551636	0.00133452765920286	0.00265995420577307
pos_1252	1.5328847718536e-05	2.26342887299154e-05	2.20279358418742e-05	2.71127299144234e-05	2.78413099175684e-05	2.22052798261632e-05	2.54963841426652e-05	2.6939016057046e-05	2.74253794777999e-05	2.12312140777076e-05	2.2875150758575e-05	2.42391509710697e-05
pos_1253	0.000169647263078527	6.25511942467572e-05	3.98161215471729e-05	9.55913194388082e-05	2.9482717779923e-05	7.45147774621749e-05	3.64813264297464e-05	3.74842382331219e-05	4.38547751207406e-05	0.000104016943806432	4.95499027861068e-05	4.27274932208108e-05
pos_1254	1.27308079629967e-05	1.75937475465662e-05	7.77088248667844e-06	1.57463879694438e-05	8.13701466674423e-06	1.17484386679186e-05	1.19090704087284e-05	9.86866181457923e-06	1.34922485078557e-05	1.47544616130387e-05	1.32764459191864e-05	1.05227069330702e-05
pos_1255	1.91400038761641e-05	1.10764153517085e-05	1.0168705385975e-05	1.9067164606927e-05	1.25078357281229e-05	1.77587787598511e-05	1.62428732483834e-05	2.78702079372639e-06	7.89777717165462e-06	2.61542542847531e-05	1.04460961960309e-05	3.46135309996147e-06
pos_1256	3.23917904731263e-05	3.62826334965168e-05	2.84739918096514e-05	3.68161203804869e-05	2.27113594420094e-05	3.1206626774988e-05	3.09063107300321e-05	3.22730243258409e-05	2.90639985151665e-05	2.66352475563798e-05	3.39299950177038e-05	2.70993092585127e-05
pos_1257	0.00081588957918522	0.00107367541780933	0.00087665293474652	0.00136856786925809	0.00101907419198513	0.00106571321750132	0.000969433401412826	0.00092194563835079	0.00111326944175967	0.00101232113716361	0.00104588461741053	0.000860326310179975
pos_126	3.661009436374e-05	4.23581233202253e-05	3.77713135933783e-05	4.99596228142002e-05	8.15010222561057e-05	6.14036788680704e-05	4.846166514604e-05	5.08828422860509e-05	6.2774417177857e-05	7.534938574164e-05	5.23000787907787e-05	4.41647389152784e-05
pos_1260	4.60237710142283e-05	3.8628921720046e-05	4.32311090433325e-05	4.12902427147342e-05	3.61192064790383e-05	3.98669725760947e-05	4.13617462310764e-05	4.31265979127535e-05	3.34444995108296e-05	5.88927951278319e-05	4.19093954210075e-05	4.28120903408603e-05
pos_1261	7.20879649672561e-05	6.75384328557026e-05	6.46527214954552e-05	5.81546404347082e-05	5.24248681060879e-05	5.92450594857874e-05	5.77162942862406e-05	6.35000070100167e-05	6.35953373938214e-05	5.40231180282244e-05	5.78430641177295e-05	5.56837157894601e-05
pos_1264	7.08923715315909e-06	1.22489627101115e-05	2.34232010237597e-06	6.77830490939731e-06	6.5639036220524e-06	4.27929417164292e-06	6.64960586052129e-06	4.38686985335451e-06	6.82827278831093e-06	3.07660632471831e-06	6.25291595546122e-06	4.76193966816973e-06
pos_1265	0.0273831575505985	0.0341560532208161	0.0326151415264218	0.0281711864656317	0.0249425544199016	0.0295713171382779	0.0264078599026415	0.0294020233508656	0.0313157670455457	0.0271714701039639	0.0296890458942431	0.0283702881919584
pos_1266	0.000204886106694779	0.000380105584755001	0.000314578995703898	0.000174982708211149	0.000159505151539248	0.000217349770564892	0.000198777158643796	0.000210802988932367	0.000293733312554703	0.000403640525728823	0.000284875793930853	0.000284502880589004
pos_1267	1.93751603107188e-06	2.79186850519182e-06	3.44992897085688e-07	1.86235703023599e-06	1.35273506666863e-06	1.44177537932596e-06	1.48357559239846e-06	3.6806880823238e-07	9.22935738076064e-07	1.31433319527206e-06	1.18166544261477e-06	3.48494179041384e-07
pos_1268	0.000356204075269974	4.7764238476627e-05	6.16391443414938e-05	4.54494311437554e-05	0.000190579970578576	0.000176271335100537	0.000150480213698157	0.000124860235824254	7.05654657990971e-05	0.000106539391291202	0.00012138861774631	0.000104461596420196
pos_127	0.000117916938390634	0.000113325431419415	0.000145030011238655	0.000195749992287513	0.000169691645531653	0.00019741420336357	0.00015427288294963	0.00018457185312733	0.000130435700537528	0.000244646794679133	0.000170608791513432	0.000168351928750424
pos_1270	6.87083562982464e-06	6.88064879033784e-06	1.18578102874268e-05	2.08103996091174e-06	6.1357186610487e-06	1.77380669725318e-06	2.39117913289514e-06	0	2.27158870131552e-06	1.58358658921546e-06	7.85798908996056e-07	4.35514326331569e-06
pos_1271	0.000900193621821249	0.00116745479826781	0.000833253996191566	0.00122216732120617	0.000856755365326855	0.000944910345857375	0.00107780384434071	0.000909827402220409	0.000718654222522459	0.000997531381329263	0.000896447060394754	0.000536087716049343
pos_1272	0.000751036707108483	0.00100823049760102	0.000784135350974936	0.000690693543085367	0.000567946060953283	0.000519904154029455	0.000534891532301538	0.000552748751587922	0.000709057961681978	0.000578532060155003	0.000567001771730197	0.000566415241551046
pos_1273	9.57424638271329e-06	1.06413847412881e-05	1.27695428063535e-05	1.71896257814561e-05	2.4779527873667e-05	1.22797762987137e-05	1.79375259340876e-05	1.12307510319837e-05	2.3117934120808e-05	1.60948925241109e-05	1.66148210454949e-05	8.12460209772071e-06
pos_1274	0.00119747635924779	0.000873971346949496	0.00113406586125886	0.00114223807058921	0.000710317443318702	0.00103661141687738	0.00108420003496155	0.00115019017385554	0.000748098160269071	0.00113999403130631	0.00117894969530224	0.00123284302226703
pos_1275	3.5920692379029e-05	4.27930356680697e-05	3.73658616619703e-05	4.66502916904127e-05	3.59764742905705e-05	3.9791922746997e-05	4.67374721615677e-05	4.3733396624098e-05	4.01329259775033e-05	3.91132912237082e-05	4.23080115509129e-05	4.15206411646782e-05
pos_1276	0.000285125594691438	0.000264595848030734	0.000246030934667277	0.000221946702853504	0.000221865977192165	0.000259525604766046	0.000244096166113425	0.00024388291586211	0.000258774635023333	0.000236960401366221	0.000254707479628878	0.000241060963434663
pos_1277	0.00148649110231964	0.000586284274561943	0.000797197420942104	0.00131050146581341	0.000853367572472783	0.0010419288821342	0.00103441148188206	0.000918768669407387	0.000869642041822622	0.000813043866101831	0.000950793483040174	0.000943944218627365
pos_1278	0.00013912864910182	0.000241357899995707	0.000293001622406208	0.000214838685598167	0.000284327842172399	0.000161981437337455	0.00043887199605653	0.000415742149348578	0.000274902819119204	0.000326173860451405	0.000225349364937808	0.000173076054396913
pos_1279	2.07181025713067e-05	2.26451275596956e-05	1.26998080314125e-05	1.76318431477406e-05	1.08790432417491e-05	1.87878993547062e-05	1.41072414543993e-05	1.17176603418483e-05	1.25403145694828e-05	1.95642575110907e-05	1.40351261882824e-05	1.25927314247665e-05
pos_128	0.00956558682159917	0.0143297336343759	0.0102240649876713	0.0136819585983459	0.0134292719554022	0.0121394465314152	0.0160254196754113	0.0127535159539324	0.0133394586205607	0.013063516863591	0.0125514098279118	0.0106102718475036
pos_1282	5.83022182144808e-06	9.51563599067805e-06	4.71485338449148e-06	8.93989725126179e-06	7.38134211987054e-06	6.90996158831925e-06	5.78122065302132e-06	6.53494079080158e-06	1.43259258857345e-05	7.4810495800482e-06	1.07290476746594e-05	8.04570452808457e-06
pos_1283	8.30257452235671e-06	1.27933191689965e-05	6.37129067048897e-06	7.7616990525659e-06	1.08669551466249e-05	8.12195615639727e-06	8.77635691880582e-06	6.99779995028148e-06	8.52182203612567e-06	9.25632710818309e-06	8.23523900061851e-06	6.88155360595564e-06
pos_1284	0.000932394074494164	0.000795458295448874	0.000740531422106218	0.000675413854450315	0.000685435962281301	0.000754916321404609	0.000747979463426558	0.000752610016036701	0.000788985751756498	0.000693785258125828	0.000740091995070497	0.000723802341021184
pos_1285	1.34209110384786e-06	2.10761227848343e-06	1.00605860318523e-06	1.38570542026231e-06	1.31444890643732e-06	1.14449977224226e-06	1.50426688192594e-06	1.28418589184881e-06	1.23349923185804e-06	1.3509593285567e-06	1.36035427288381e-06	2.05537806017737e-06
pos_1286	4.26901354056363e-05	1.74527944164384e-05	1.20111010406428e-05	9.04711991661521e-06	2.61039086955695e-05	2.42298041878089e-05	2.78860717235945e-05	2.05436992850005e-05	1.83224423560462e-05	1.87617864248305e-05	1.79847804410333e-05	2.0358168331753e-05
pos_1287	3.15819127196942e-05	4.1703513761059e-05	2.43623133979205e-05	3.97516893156749e-05	3.94884818077197e-05	3.68199555190028e-05	3.8204416277576e-05	3.05695090883221e-05	2.64077377676559e-05	3.31674378085728e-05	3.5517573779251e-05	2.69006246779705e-05
pos_1288	0.000298983448504834	0.000333160194702935	0.000922010839103759	0.000237711639051813	0.000339844487902542	0.000415954133962222	0.000459809636128674	0.000533123964049495	0.000316922027553701	0.000635647233470722	0.000813868840427879	0.000562744346580251
pos_1289	8.66128013940997e-06	2.44885693084576e-06	1.01773730805491e-05	4.36398779334032e-06	1.34113334924117e-05	4.06298411274431e-06	2.00774994787984e-06	3.43518893349756e-06	2.48344026139341e-06	5.96114808376895e-06	3.01206995342089e-06	5.79197739616079e-06
pos_129	0.00019973834686524	0.000200685094757627	0.000853172922397732	8.31295217846434e-05	0.000272870431932781	0.000307933810777474	8.43395146213834e-05	0.000232642697461796	7.75318674444681e-05	0.00163517440191459	0.000307892729822417	0.000532219066130487
pos_1290	1.13243495007456e-05	1.3219259260806e-05	1.09790979527635e-05	1.28848506259087e-05	1.15670747941141e-05	1.12403039859795e-05	1.05285917803596e-05	1.08636545029521e-05	1.27007573760859e-05	1.07766621258677e-05	1.08463306424422e-05	1.18302098192058e-05
pos_1291	0.000178914152131474	0.000142082766026002	0.000115348449439559	0.000149846492850154	0.000122856549454064	0.000134162919588135	0.000145432615028673	0.00016583056884375	0.000183687088843243	0.000153420026786609	0.000158066007904133	0.000191745113113411
pos_1292	0.000922609764032186	0.00134595370473771	0.00183771201257685	0.000802237618657016	0.00116481311059918	0.00121866613149198	0.000740460318858703	0.00112341824275895	0.000919002232272736	0.00178593710541726	0.00126826499969806	0.00136936628329615
pos_1293	5.70622305543822e-06	4.89903656397404e-06	4.6908256243583e-06	4.25501685587033e-06	4.20873790839255e-06	4.98978654556474e-06	4.70863533849879e-06	4.91452501111544e-06	4.88594529045165e-06	4.45716187300884e-06	4.34316440855743e-06	4.83573424096396e-06
pos_1295	1.26729803605664e-05	6.24730321695186e-06	3.29665821910793e-06	9.81137529856532e-07	1.34483003283512e-06	7.1300865169679e-06	7.48812236036562e-07	8.59906481880739e-07	1.0848958248778e-06	2.81674896187754e-06	3.0697949566729e-06	0
pos_1296	3.01089096771921e-05	4.10865619023338e-05	5.79191938927649e-05	5.8990026504973e-05	6.27490298586381e-05	4.76486184481597e-05	5.78025380562578e-05	6.24012316396137e-05	4.8948828051064e-05	4.57709542615969e-05	5.00261263020441e-05	5.4030951876026e-05
pos_1297	0.000203914155447108	0.000175582827115808	0.000395912160540605	6.26513655319519e-05	0.000421874467468651	0.000252174168424208	3.86774362113439e-05	0.000103642392599656	9.7484462176299e-05	0.000846123042744953	0.000248702586465807	0.000201752467597731
pos_1298	2.44697944391922e-06	3.18532889338232e-06	2.00597701437951e-06	1.95376005855351e-06	4.60060547685507e-06	2.43390653120548e-06	3.4360324293688e-06	2.39572474601243e-06	3.90253805193798e-06	3.34008643663647e-06	2.15348334147023e-06	3.70968056096887e-06
pos_1299	6.11850076560762e-05	6.33463725808219e-05	0.000115363617158126	9.24705308434257e-05	0.00011409148490573	8.7913497328082e-05	5.74331009644497e-05	6.36539804891353e-05	9.70098157044989e-05	9.04270807990136e-05	7.29949988195938e-05	8.11542309276455e-05
pos_13	2.23969131286124e-05	2.45634066321134e-05	1.62846721844283e-05	1.83684777618099e-05	3.06808072090743e-05	1.80085358199754e-05	2.32739563592637e-05	2.38366194607509e-05	2.20794098373643e-05	3.07768986298694e-05	2.12526076891193e-05	2.78755243416126e-05
pos_130	1.64463899194351e-05	8.03777086085386e-05	9.73882416445587e-06	1.58271814701463e-05	2.51108658476852e-05	1.76293528950409e-05	1.3604381688604e-05	1.66058653963087e-05	2.55159686389316e-05	1.84902808914146e-05	1.52767136095026e-05	1.27971799704256e-05
pos_1300	0.000516177259545004	0.000307650675408676	0.000254183040458891	0.000252684547149847	0.000355979416085232	0.000312988965324206	0.000381544960738237	0.000327626993588758	0.000307203140802959	0.000283728953774324	0.000332283104344526	0.000336292210379265
pos_1301	3.20517760485464e-05	4.17087549303255e-05	4.20472383059359e-05	3.5340788118126e-05	3.05843560319044e-05	4.56051805142697e-05	3.356548323395e-05	4.0912149073291e-05	4.57232198446704e-05	4.07814627549097e-05	4.04359524062511e-05	3.64230470370473e-05
pos_1303	2.16293973709398e-05	3.20586450074868e-05	1.74500153253142e-05	2.51789291274788e-05	2.2929694208359e-05	2.25208831862733e-05	2.13057430271401e-05	2.16944288012366e-05	1.76580048486725e-05	2.76695274020105e-05	2.05714950741328e-05	1.84228784949229e-05
pos_1304	8.27538699079665e-05	9.82526541448008e-05	0.000104456262470658	9.45787698874181e-05	8.07370970899906e-05	8.94933208072982e-05	8.56199298465793e-05	9.44291549689873e-05	9.51883621521759e-05	9.70911994352748e-05	9.41664173183019e-05	8.86065612991397e-05
pos_1305	4.37752120325568e-05	4.88599569577114e-05	4.37172205812665e-05	4.75383991364898e-05	3.94465643252729e-05	4.45766943964743e-05	4.05666837766621e-05	4.4215201580114e-05	3.9507557899205e-05	4.16809678594724e-05	4.38236525570408e-05	4.02445979033122e-05
pos_1306	4.81448042470606e-05	5.78660839260259e-05	5.26647981351269e-05	4.98970936001761e-05	4.48317738257783e-05	4.92163117057226e-05	4.78284186052174e-05	5.17078678276201e-05	5.369684017699e-05	4.79680545125029e-05	5.21847437642022e-05	5.01532952251061e-05
pos_1307	0.00216949753161676	0.00166345128763775	0.0014882139028658	0.00167534961564716	0.00131368858250914	0.00151887869208602	0.00153363350371889	0.00148988129499353	0.00162724523989405	0.0015055779900238	0.00155028443301969	0.00133971181005205
pos_1308	6.17645902587467e-05	6.52661947738841e-05	6.04704345811661e-05	5.59757404560689e-05	5.32827301523296e-05	5.72108178971103e-05	5.24982833267222e-05	5.83158011068176e-05	5.39996342417839e-05	6.31710249172925e-05	5.63176573170488e-05	5.83845686364583e-05
pos_1309	8.9534843481527e-06	6.99805113265509e-06	3.13860346135632e-06	6.12594773370443e-06	1.26043944454872e-05	8.33647030811281e-06	1.49528661025606e-05	9.98507361711235e-06	7.29661020501872e-06	3.2012313508246e-06	9.20127269392335e-06	4.3690880524619e-06
pos_1310	1.880146243414e-05	2.07891579137137e-05	1.7214056067928e-05	2.42531632168578e-05	0.000543584306261054	2.1453249131386e-05	2.40625232459175e-05	2.2676445876785e-05	1.99191016346778e-05	2.09512860985764e-05	2.27169584446e-05	2.24872126549293e-05
pos_1311	0.000101037532027429	7.77899387493278e-05	8.70331859208876e-05	5.98753450772786e-05	7.49816952073128e-05	7.74804940920492e-05	7.35623716034624e-05	7.88843704154777e-05	7.24427231728927e-05	9.14825177592364e-05	8.00039469143523e-05	8.84863177208163e-05
pos_1312	1.66947190811225e-05	1.05881210588029e-06	2.28750088019599e-06	1.59936902347235e-06	9.01294083674315e-06	7.1774265957978e-06	8.26362612441436e-06	6.75096009497921e-06	2.33896454727637e-06	5.45487601429261e-06	4.9491536723369e-06	3.80475227353352e-06
pos_1313	2.78865517310007e-05	5.94365845055209e-05	3.32686472043953e-05	0.000125580944934329	1.17337145263852e-05	4.70014656972196e-05	2.50801436619003e-05	2.27095491718361e-05	7.07762466778637e-05	4.60526121164873e-05	3.49250803410823e-05	2.1914166394652e-05
pos_1314	8.32677852614526e-05	0.000114633372203692	4.27434314488199e-05	5.87785358204991e-05	9.65364218267481e-05	7.34904115621484e-05	5.39637452942184e-05	4.27046724304506e-05	5.2759117371608e-05	7.65019602748674e-05	5.67294220553027e-05	4.45751910200535e-05
pos_1315	1.7344746416432e-05	2.48742239286796e-05	1.25964797854797e-05	2.11276772671357e-05	2.00022846694726e-05	1.75999854662526e-05	1.94735988577458e-05	1.68070395227514e-05	2.08822698184919e-05	2.10441658315305e-05	1.80701641688068e-05	1.32266832218429e-05
pos_1316	0.00814858214442947	0.00296824087484921	0.00297369924001983	0.00255114294921671	0.0037340099923378	0.00374999204560251	0.00401301564950852	0.00347163469339546	0.00335976075546833	0.00322260473126622	0.00352531118540033	0.00352455074223971
pos_1317	7.04973001533332e-05	0.00011443115944705	7.6182975702631e-05	6.83695146135636e-05	7.66735589359853e-05	7.48446207895527e-05	0.000114417989239475	0.00010504134835483	7.13548946824478e-05	7.53873262770238e-05	9.698949181474e-05	9.03841217838162e-05
pos_1318	0.000176174331844072	0.000178064962101222	0.000197283549066299	0.00016260095370794	0.000166826813774261	0.000178597746060186	0.000125215589890289	0.00016244245702283	0.00019213156828298	0.000174737708123971	0.000167919886783104	0.000196832166950055
pos_132	0.000127558715619372	0.000113611209359602	0.000171969931895308	0.000184571664217063	7.20911765895505e-05	0.000133113990206956	0.000161421821618466	0.000152388478310156	0.000156238813546515	0.000118852363636095	0.000152498285543868	0.00015562813017119
pos_1320	0.00202323143465156	0.00180201663882979	0.00160180934016776	0.00181835338793389	0.00170551126233748	0.00172142235207509	0.00199173198764084	0.00190849374685039	0.00196406490718556	0.00188976725775007	0.00183996293703257	0.00189404331041662
pos_1321	0.000327967264273695	0.000862189086946261	9.98503111623536e-05	9.29602844452244e-05	7.40989823107653e-05	0.000214948970037813	0.000106432772485059	0.000114327533787874	9.96347372999422e-05	8.93894307566803e-05	9.42412352465548e-05	0.00013905065211803
pos_1322	0.0001891907221572	0.000184391094398995	0.000186179616068265	0.000158264846555223	0.000189069136368396	0.000175748202956967	0.00019544767021446	0.000185944965197339	0.000154761556899056	0.0002012480283098	0.00015472344687666	0.000197991869108207
pos_1323	1.81222276171407e-05	1.85047438939659e-05	1.3802855521764e-05	2.27998558003795e-05	1.52709612350273e-05	1.9161265097041e-05	1.87153264668074e-05	1.75190611026465e-05	1.53643167161108e-05	1.71162889530957e-05	1.92887702243487e-05	1.44993640831987e-05
pos_1325	0.000303669113240613	0.000305794179840574	0.000316664948751881	0.000153894303978439	0.000216386057733653	0.000265598092152241	9.56301147257149e-05	0.000188733331174315	0.000106346235310959	0.000322505435158013	0.00017169334010077	0.00040554955430879
pos_1326	0.000218497942052943	0.000253316040996134	0.000426560126972914	0.000514238552458472	0.000610196352340334	0.000364434657827048	0.0004923676577913	0.000510134581270596	0.00041588986965582	0.000318810524463975	0.000365672083883234	0.000336775495966155
pos_1327	2.47839804968465e-05	6.1059696391284e-06	8.71787606722655e-06	7.49127240745354e-06	9.61115883272584e-06	8.76283551695161e-06	1.209976075925e-05	8.23049306348961e-06	1.0674384094721e-05	8.76793689051337e-06	9.16079349602323e-06	1.03376790390848e-05
pos_1328	1.8814823067755e-05	4.60840265327482e-05	1.78962766627701e-05	2.01162827468139e-05	2.45673449442638e-05	2.43162178694514e-05	4.28630834050164e-05	3.60262904381374e-05	2.53429394700381e-05	2.51657649496546e-05	3.29211663591323e-05	0.00223679593485489
pos_1329	5.75292886424592e-06	7.85184886707646e-06	8.13294922482475e-06	5.21323356165369e-06	3.75248309755147e-06	5.96901064683354e-06	4.02432046093245e-06	6.02879655339154e-06	6.8106195620399e-06	5.5523799028788e-06	4.92378624667949e-06	4.73208789418985e-06
pos_133	0.000103118850128283	0.000109063317709569	9.64100774997213e-05	8.9872428638604e-05	0.000109880167922847	9.58178089315817e-05	0.000160481239787251	0.000123965532079287	0.000161581551878289	0.000113844242670593	0.000131320970480963	8.03247388867606e-05
pos_1330	0.000460556499509836	0.000191307418356675	0.000178377954977959	0.000171249526430633	0.000207444634495452	0.000211593462989187	0.000236019582605146	0.000198317396286914	0.000193173244676762	0.000177143033636242	0.000192064421838601	0.000184410961591127
pos_1332	0.000500449163567048	0.000540766376498502	0.000519434745797191	0.000613444286314808	0.00048103096352461	0.00056390862885142	0.000567130944758369	0.000574502764623688	0.000558364927434623	0.000567466841334785	0.000587790723345189	0.000547181324354769
pos_1333	5.87076575108998e-05	6.41237118290316e-05	5.19127096878858e-05	0.000174709824766309	4.98791157192279e-05	5.69617267699342e-05	4.95466294011468e-05	0.000112983712230291	0.000267934085034741	7.97093606466462e-05	0.000213247532131607	0.00014042050970485
pos_1334	0.000254399988050147	0.000762739202962404	0.00107482059960423	0.000542228070809575	0.000434822675468574	0.000524058972487762	0.000576998075166454	0.000988384093429528	0.000628770182933209	0.000627204499842167	0.00073015790217037	0.00102759437664897
pos_1336	1.10143275689103e-05	2.31595750292418e-05	2.14060042750917e-05	2.09439965449765e-05	9.41871854216108e-06	1.94859342056183e-05	1.69415846838409e-05	2.95510901394166e-05	1.60516246212235e-05	1.58074107108644e-05	1.52973067358869e-05	1.84286882994678e-05
pos_1338	3.06504766705764e-05	4.51665606307399e-05	2.34860611438098e-05	3.0817497537213e-05	3.24169172222506e-05	2.91580919887087e-05	3.2075769330625e-05	2.82471638607767e-05	3.13709833730862e-05	3.84328448606904e-05	2.80675322326827e-05	2.75070603977905e-05
pos_1339	2.6737422015098e-05	1.06320367149939e-05	6.12161318031332e-05	2.38207796162021e-05	3.67652222287132e-05	0.000219668919948046	5.6437120313746e-05	6.2945311180036e-05	8.03107635436269e-05	0.000124542637431557	5.17243721510084e-05	3.91435682518875e-05
pos_134	0.000597888574619807	0.000809571516450661	0.000402010106996638	0.00061205327314991	0.000692521707040265	0.000630516685064865	0.00051559979328173	0.000372823786799877	0.000402592706906503	0.000760776025471454	0.000473564140212548	0.00025765746727218
pos_1341	0.00649811595198651	0.00293477443289898	0.00271437686388168	0.00249570365767038	0.00438688205007149	0.00446498034389829	0.00480372025142202	0.00385208975071607	0.00357112643550484	0.00356931586040785	0.00379450102718991	0.0040797248078488
pos_1343	3.16717766270441e-05	3.85051518905014e-05	3.43853873818067e-05	3.4151243273245e-05	2.60870942943951e-05	3.22925731498529e-05	3.1779555503327e-05	3.3299571693899e-05	3.53332791573456e-05	3.02187771727824e-05	3.26610406959695e-05	3.15807340422501e-05
pos_1344	0.0022761867463638	0.00318423756925844	0.00256279140412057	0.00261435669431372	0.00172562366324456	0.00291905290085321	0.00238878150544501	0.00269775461754015	0.00280758670856616	0.00196207725064265	0.00280412881400834	0.00228338392682814
pos_1345	4.49652912993909e-05	2.19621806563784e-05	2.42535871999318e-05	2.10549758138459e-05	2.4922907857798e-05	2.24476041671605e-05	4.74933058891599e-05	3.56479349312388e-05	4.77356813389328e-05	1.9268488434717e-05	2.64519816698155e-05	4.77973745079864e-05
pos_1347	4.24099807436897e-06	5.38725000230506e-06	5.88934074340801e-06	5.80958631703303e-06	5.46529717413635e-06	5.36196926011316e-06	5.39266050009931e-06	6.90302407684911e-06	5.73398984873798e-06	5.95688276336644e-06	6.20198315186751e-06	6.8049647913759e-06
pos_1348	7.65683111923769e-06	1.91755344570296e-05	3.57636969231502e-06	6.6459214561802e-06	8.63219155798208e-06	8.39543580882237e-06	7.02185774582547e-06	4.43972974620776e-06	1.03849644230368e-05	1.23294820172559e-05	9.12642297284605e-06	5.63712527588574e-06
pos_1349	2.421141771244e-05	3.04387274509037e-05	2.7298347758023e-05	2.53206073315873e-05	2.26713872592574e-05	2.47734927623419e-05	2.23717341569504e-05	2.49347026720107e-05	2.78098103379943e-05	2.17498432384074e-05	2.46424778713394e-05	2.46888131854905e-05
pos_135	0.00028219052587091	0.000237526266822087	0.000192372339695398	0.000299684189845267	0.000229327687949681	0.000252811172449093	0.000482333114813914	0.000361695335913765	0.000277944861038184	0.000284480114025575	0.000343538576855507	0.000244510545152894
pos_1350	4.95239835243586e-06	7.43772390751014e-06	3.08264539801232e-05	2.87257484499613e-06	1.9952011404309e-06	9.05116240347787e-06	5.86586358898253e-06	0.000134314166112847	7.31486270957778e-05	2.12612561358357e-06	9.82651524912269e-05	0.000343470149132853
pos_1351	2.3035408682377e-05	2.13801697994952e-05	4.93267348738042e-06	1.90088976699097e-05	1.76366283178207e-05	1.57909754403001e-05	5.12636503859076e-05	3.33282324464124e-05	9.78353023097308e-06	5.25061922141539e-05	3.30485603454829e-05	1.06366986049921e-05
pos_1352	2.7484524312487e-06	4.08493705002979e-06	2.40585776387901e-06	2.64954467435271e-06	2.66559191767664e-06	2.67650041940721e-06	3.04368811483279e-06	2.25612406509945e-06	5.18875944269072e-06	2.58512243940153e-06	3.26067539179862e-06	3.14781838338323e-06
pos_1353	1.5012588045451e-05	5.27202238242029e-06	3.23542116623596e-05	1.45630821490225e-05	2.28837085222071e-05	0.000132849772580879	3.70851718160335e-05	3.72435581405282e-05	4.89439409068876e-05	7.05321040245912e-05	3.40903751996958e-05	2.57829644613861e-05
pos_1354	7.31213702834783e-06	1.26205376156141e-05	3.35859033563193e-06	5.07090953040899e-05	5.07034771009731e-06	1.79081233408276e-05	1.98401319700363e-05	1.28904077747235e-05	6.08703867226003e-09	2.61098220449751e-06	1.1113344764176e-05	4.16174321273513e-07
pos_1355	0.000247035128140017	0.000240938133782215	0.000513792119563923	0.000421044669512726	0.000372094378878419	0.000349220790032932	0.000228422021064922	0.000497563358540792	0.000270030499518995	0.000238512289588293	0.000340596370960418	0.000482508198303188
pos_1356	6.254774774763e-06	3.48335474280711e-05	6.63899876223385e-07	2.35415141405784e-06	2.0799618747688e-05	1.19897950151721e-05	7.93030852926571e-06	2.30894918046743e-06	9.11494385960132e-06	2.39848961826292e-05	8.95207514029987e-06	2.83117892518686e-06
pos_1358	4.23482387234368e-05	6.07662891009611e-05	5.54048509199359e-05	5.59494189725341e-05	3.73490795335637e-05	5.24327806963118e-05	4.28047019229227e-05	5.31157719394843e-05	5.79901350944425e-05	4.38845140039926e-05	4.85354846542403e-05	4.7024983320669e-05
pos_136	0.00587146015636069	0.00304392233094023	0.00102204846443927	0.00261636085813087	0.000453814922389576	0.00243252080725715	0.00064638126608757	0.000871155695349433	0.00139788880346509	0.00747615734486529	0.00226674945931043	0.0013437158991428
pos_1360	2.09527933839213e-05	2.97526053201771e-05	2.9799969085188e-05	6.64977917681452e-06	7.33245523830438e-06	7.86335817362492e-05	5.97754242503466e-06	6.91401888843919e-05	6.5930802590592e-06	7.56990367163447e-05	8.61492390273227e-05	7.56425234322213e-05
pos_1361	0.000108834444216852	0.000174335743349524	0.00013775391221936	0.00014805059891577	0.00010835119050981	0.000141462757847652	0.000134071075486489	0.000127384809983552	0.000151478344842971	0.000138760016018241	0.000138062938716541	0.000111685438905082
pos_1362	1.18706276380756e-05	8.38718685838071e-06	7.12383378181231e-06	8.4194443664096e-06	6.15727168790657e-06	7.33849452667918e-06	8.1918816201105e-06	7.73448638941517e-06	7.03314019384478e-06	8.86465961327815e-06	7.60120215440479e-06	1.12771296499337e-05
pos_1363	5.64151332686819e-05	5.44113921284071e-05	7.05899073762935e-05	4.02058227496322e-05	5.42766070013896e-05	5.27275393890799e-05	4.74176287445445e-05	5.54502446676625e-05	4.24018095365618e-05	7.59268065483188e-05	5.8976468293509e-05	6.97515453303567e-05
pos_1364	8.73342581337702e-05	5.19874603002746e-05	3.64068191130312e-05	5.04620943632213e-05	5.1263371577389e-05	5.79595569979693e-05	5.18063183053235e-05	5.04276587871877e-05	5.00512201598686e-05	4.32251125060748e-05	4.45671124362657e-05	5.39535575346622e-05
pos_1365	0.000324776566342586	0.00012598224483792	0.000113674188593046	0.000104442582157014	0.000154165391173389	0.000147816911768643	0.000173003373165158	0.000139478821321343	0.000128509855616811	0.000127669264071462	0.00013815440172884	0.00013711928705234
pos_1366	7.49093799587881e-05	0.000101168809196972	8.67575935486547e-05	0.000107564658642619	9.19548409346223e-05	0.000104732433851904	9.96645591203828e-05	8.72235647282508e-05	0.00012082639579915	0.000100952519615512	0.000104948095875248	8.30049751558049e-05
pos_1367	3.25581024774294e-06	4.80509939227293e-06	1.39054168676293e-06	4.52601929323536e-06	2.74374877358906e-06	4.26802516362791e-06	4.79785954308387e-06	3.36548561054646e-06	4.74112351231887e-06	5.3378833228614e-06	5.28641887875219e-06	1.82694800437445e-06
pos_1368	1.83898722185486e-05	5.94463922817574e-06	1.70832327473927e-06	2.536549891259e-08	6.13665070420939e-07	4.91497284627991e-06	2.97140099125371e-05	1.72482269308471e-05	1.39719236069853e-06	6.50027549007252e-06	7.02330149916486e-06	1.38168195829853e-06
pos_1369	2.47062469849395e-05	3.256175312242e-05	1.42272060706712e-05	2.2896397187451e-05	2.66153220706785e-05	2.29508609885507e-05	2.14982203690657e-05	1.76514686604683e-05	2.11796690154195e-05	2.71578847165911e-05	2.03595537494195e-05	1.69660300378409e-05
pos_137	0.000173893928184645	0.000177294662685662	2.24096864328154e-05	0.000109162126041124	0.000179773753278698	0.000137010659799997	2.41227576760009e-05	2.43181109419071e-05	1.97511558758124e-05	0.000131901885625438	5.0594031133571e-05	2.83048422175909e-05
pos_1370	1.85471589702265e-05	1.41158741298001e-05	0	2.74876998979499e-06	1.3822956366106e-05	6.66522024259159e-06	3.46808654564704e-07	2.7550334907704e-07	1.8953720964621e-07	4.52544860509124e-06	5.08894023222634e-07	9.17553807195752e-08
pos_1371	3.06705046384331e-06	4.89357185441307e-06	4.41569515365794e-07	3.89884570725048e-06	2.6436838958978e-06	2.76205523266864e-06	3.41668430026941e-06	1.9180868558296e-06	5.4104279012127e-07	3.81054398751788e-06	2.60007083478185e-06	3.05544254430245e-07
pos_1372	8.89509012233907e-06	2.2056008512307e-05	9.06191591890368e-06	1.66615568582796e-05	2.03101605761738e-05	1.2721520254882e-05	1.79801407545588e-05	1.46244377369279e-05	7.62254377149198e-06	1.23882707710748e-05	1.41315821630702e-05	1.02471654851816e-05
pos_1373	0.00314695761816335	0.00106490295244397	0.0010132594593653	0.000865466511225282	0.001416330214597	0.00136124006851067	0.00149500608188409	0.00122371177250459	0.00119557500250566	0.00115359698737976	0.00124429627225821	0.00120184367435356
pos_1374	5.3796619703416e-05	5.99853689220266e-05	6.23422800987689e-05	7.92900108071659e-05	0.000105835340355188	6.7540808977089e-05	6.69396544230485e-05	6.97869495532966e-05	7.08145597297352e-05	6.86928102085621e-05	6.9620814319309e-05	7.67442906257143e-05
pos_1375	0.000149423863082705	0.000206605961466955	0.000132932608977143	0.000132244364865358	0.000155242634599261	0.00017091433106524	0.000269311673112893	0.000241852240413771	0.000137529256797135	0.000177755440418584	0.000192645867807034	0.000155638910445327
pos_1376	1.0054481960694e-05	1.16962725187996e-05	0	7.98012419853088e-06	9.71768486525661e-06	7.19593711026315e-06	0	0	0	6.89429874645566e-06	7.16181342852175e-07	0
pos_1379	7.77392250774873e-05	9.40483606809514e-05	0.000122511097266598	3.19403944603029e-05	9.04932048430892e-05	0.000100048525741076	2.06119197202191e-05	7.04253314938337e-05	4.2996249554783e-05	0.000123298862162946	9.28658533688427e-05	0.000102567568741046
pos_138	0.00307162306466618	0.00354014715810102	0.00254830677685345	0.00319221571706638	0.00368773956450683	0.0031275528941251	0.00267903361422274	0.00290814239815041	0.00366051057399974	0.00365843118780879	0.00315445974843328	0.00277640563721515
pos_1380	3.8533823709197e-05	8.92111201940979e-06	3.36055727216099e-06	8.93930421140541e-05	1.24252103485763e-05	2.5110660341257e-05	2.77675418304424e-05	3.07455295139841e-05	3.95747349173901e-06	0.000120031862252035	4.15111999460586e-05	3.77139177942038e-05
pos_1381	2.49349552505218e-05	3.63332145908761e-05	4.73268578129351e-05	4.04423943027185e-05	3.15883599279883e-05	4.86669122471633e-05	4.15491509500115e-05	5.44700190339456e-05	4.95540982352512e-05	4.9075064340246e-05	4.55691760025956e-05	4.9763153662264e-05
pos_1382	7.76268984074505e-06	3.16758228187999e-05	9.21120666325102e-07	1.02287799920914e-06	6.32221619147672e-07	5.45236247942563e-06	4.67720626791323e-07	1.15414333412603e-05	7.0478241718551e-06	1.71312029987501e-06	8.62272188364581e-06	2.79031438474011e-05
pos_1383	0.00252282694360387	0.00135399977874569	0.00125615210114881	0.00111134664783451	0.00136494687467216	0.00141317538142883	0.00143685247714904	0.00134027670508201	0.0014574985080816	0.00128968349326358	0.00136422772813082	0.00129998999729388
pos_1385	2.93920584981554e-06	2.68926007441298e-06	2.80390228039052e-06	2.63477613414478e-05	4.72595285324771e-06	4.94292311320814e-06	4.22979710440418e-06	6.75921830407586e-06	2.74767866217556e-06	3.69926393683203e-06	5.12638561747279e-06	1.28353345348789e-05
pos_1386	6.44850184610335e-06	1.28514119654289e-05	1.78616975243178e-05	3.98289676486193e-06	9.69427562872753e-06	1.43166620884793e-05	2.96329475040052e-06	8.87541448168644e-06	4.07183893969935e-06	6.45148083356849e-05	1.4942324116472e-05	2.00757588680286e-05
pos_1387	3.08535465441221e-06	4.36112629158822e-06	1.83356285771595e-06	8.79837456478572e-06	1.64972708955126e-07	2.17453389570295e-06	8.27645202096129e-06	1.34003361273079e-06	1.06517403470054e-06	8.57703935342127e-06	2.80674415183221e-06	5.39292529443982e-07
pos_1388	0	0	4.9564236760293e-06	8.5901054589374e-07	1.69888160291032e-07	0	0	2.09422619478384e-06	0	5.2066867750608e-06	0	3.17906709192295e-06
pos_1389	5.96204382176876e-06	5.66769610115565e-06	2.97796051560321e-06	5.76885868273064e-06	5.55463672641555e-06	6.65789389596654e-06	6.22553634272795e-06	4.18881557049488e-06	5.26684746104937e-06	3.22861380077625e-05	1.11631703287356e-05	3.63854913717342e-06
pos_1390	0.000118384729520067	0.000324743305284892	4.08872626528533e-05	5.07723036994431e-05	0.00014596073807235	0.000118214211779411	6.03008970572202e-05	5.29636032679468e-05	5.67750199523391e-05	5.54571809088907e-05	5.6122251592352e-05	4.68321649480113e-05
pos_1391	0.000205081204713271	0.000306509382455052	0.000403070812608325	0.00028677026593061	0.000350954639181389	0.000316237246173316	0.000286903720769829	0.000357878490225375	0.000280845161155917	0.000437252477602177	0.000336685785197329	0.000437396613291853
pos_1392	4.75208938254074e-05	8.04112672829539e-05	4.14503411315364e-05	5.70868383649864e-05	5.34230141338005e-05	4.99490811097614e-05	6.42993209612325e-05	5.25196030137494e-05	6.4838023985904e-05	5.63789184149961e-05	5.61003592355329e-05	4.44612007810351e-05
pos_1393	7.36305987918733e-06	1.71486937577001e-05	1.75732672666085e-05	4.75840353792433e-05	1.72063008455686e-05	2.32980803363806e-05	1.05922450286028e-05	1.83680249435241e-05	8.85157650162239e-06	1.03271040396871e-05	1.60330131228418e-05	4.56613723619494e-05
pos_1394	0.000139457250575324	0.000174247360561005	0.000270380805770083	0.000254274820689011	0.000135111627790851	0.000187588088624909	0.000176575498449584	0.000211171561531781	0.000167055006041947	0.000205555001519346	0.000208075670080589	0.000269680744839691
pos_1396	0.000142768116863129	0.000186646356196267	0.000172917240210142	0.00015820504838833	0.00013250174724531	0.000152143507383544	0.00014584165251344	0.000158407381944778	0.000173473488736085	0.000154471513975638	0.000151945523129179	0.000147912436145578
pos_1397	2.65911707281154e-05	1.37332970356156e-05	6.95819882434727e-06	1.21071728812781e-05	1.81379135113827e-05	1.68474768246097e-05	8.2194410937336e-05	3.95378746917453e-05	6.98886337784321e-06	2.47080764053181e-05	3.4338581581159e-05	1.24528382291068e-06
pos_1398	4.25034274246691e-05	5.31746026636744e-05	3.72814781927738e-05	4.2656282310661e-05	4.09883459991341e-05	3.92204388896029e-05	3.10966700280669e-05	3.86845975148939e-05	4.73275410381517e-05	3.92891622949329e-05	3.97238610570243e-05	5.23552650896038e-05
pos_1399	5.25720419294241e-05	7.63586896931866e-05	3.1725711643577e-05	5.24027536340587e-05	5.58811634304612e-05	4.96445403309895e-05	5.20071358031181e-05	4.62086970580991e-05	5.04951474517517e-05	5.75266748579212e-05	4.68590702623293e-05	3.5376134621047e-05
pos_14	8.72341904861399e-07	1.28076847728259e-06	2.86446709936845e-06	4.10845802779418e-06	2.99538296233773e-06	3.16988921531297e-06	3.54799515097164e-06	3.28141099553559e-06	3.65019464165561e-06	2.70894810953893e-06	3.74133783717818e-06	3.53914311987931e-06
pos_140	0.000725802760022383	0.000503918261020971	0.000476495549673714	0.000606214314634699	0.000468334289480201	0.000573192427469647	0.000622162502390334	0.000917976341366234	0.000745895634078685	0.000537248937726507	0.000803244960149637	0.00130789714618476
pos_1400	0.0136869845971094	0.0205875463456008	0.0184105544930216	0.0197947455156409	0.0151575713392229	0.0157125505671298	0.0117520446741079	0.0161335432430645	0.0181678577313539	0.0152919984637677	0.0173533986361573	0.0162338653995277
pos_1401	0.000477937932386951	0.000137791279467944	0.000154675202051936	0.000118271482628789	0.000273894889113452	0.000279135031140794	0.000247602494008394	0.000220925308016467	0.000182818189914009	0.000186546092693689	0.000211566494969743	0.000200963490140788
pos_1402	0.000151585544599397	0.000195955818073042	0.000181503600402172	0.000176196950167957	0.00015063652819877	0.000177616104988897	0.000201969805855275	0.000189037083223811	0.000197962916260091	0.000170442908957652	0.000185319707241882	0.000164265782977297
pos_1403	0.00607455983589868	0.00676178218458976	0.00680735785038745	0.00352954376692546	0.00322008672234822	0.00509691608259597	0.00226511916412327	0.00444004671895304	0.00411842229003799	0.00363511354087203	0.00429576025309229	0.00616907062951013
pos_1404	3.86778959094141e-06	1.49046159881476e-06	3.01136244634738e-07	1.04372578064994e-06	3.50862047660615e-06	2.34029552167867e-06	3.01949625035258e-06	1.33915161065539e-06	1.36376694574029e-06	1.23206790121027e-06	1.85967431214129e-06	1.03849906310489e-05
pos_1405	3.59184521611174e-05	3.99513079773181e-05	2.68845216465845e-05	3.27781641715589e-05	5.33968577159656e-05	2.64527138168968e-05	3.60222831901359e-05	3.58681963882764e-05	4.12912004505729e-05	2.65539713024974e-05	3.35540549825908e-05	4.10845821956566e-05
pos_1406	0.0005358755494294	0.000140999727690652	0.000143050680553857	0.00011535507795624	0.00030954156176188	0.000308184013517262	0.000271852027999197	0.000229324236629694	0.000186558771701023	0.000203187045691415	0.000229977543762353	0.00021073361013034
pos_1407	5.18855724099993e-05	6.79199437292507e-05	0.000469484921772352	4.89162292712085e-05	4.87536631886777e-05	6.11622150866823e-05	0.00018190384911729	0.0002142192943961	6.50062299058375e-05	0.000219815959119168	0.000370299957269009	6.19503530038587e-05
pos_1408	0.000318633126348585	0.000416452668446025	0.000537908005592419	0.000392698300311282	0.000307323035793485	0.000362414567739016	0.00033250011599045	0.000404156794748062	0.000429616260718163	0.000322871504174112	0.000392113260425972	0.000387928911270317
pos_1409	2.34089967837454e-05	2.92703862385402e-05	2.59232366198029e-05	2.51849466616745e-05	1.91709423452221e-05	2.40741222220352e-05	2.15181906830996e-05	2.45844381075372e-05	2.45325858475857e-05	2.27379808367324e-05	2.48740718624218e-05	2.22568471809125e-05
pos_141	2.7315854878403e-05	3.0896373119871e-05	2.8780594031392e-05	2.76599478468852e-05	2.64641948937256e-05	3.0802103605661e-05	2.90485952422033e-05	2.99687639523779e-05	3.03876586517139e-05	2.7568468786667e-05	2.94910524081698e-05	2.54741952418978e-05
pos_1410	9.71708229583566e-05	0.000111902191277403	0.000114885981956088	0.000102064926532246	8.38251442898298e-05	0.000106638841296889	6.79614593548627e-05	9.64876052526072e-05	0.000109279891068432	7.9983547623316e-05	0.00010375299449096	0.000110555795503347
pos_1411	0.000281282565115092	0.000317042029006708	0.000299938339572597	0.000310218203202648	0.000256934178059219	0.000291235701865309	0.000285782633120436	0.000303737549476096	0.00029386581841357	0.000287184828049044	0.000298838582123826	0.00029298945854252
pos_1412	6.33368410011311e-05	7.32880846793761e-05	0.000306931813704299	8.93346301373953e-05	6.37478113824632e-05	0.000102731766646412	5.07831606335262e-05	8.48761933690261e-05	6.4963332544345e-05	5.15622318717536e-05	8.61203090004835e-05	0.000191627615490944
pos_1413	1.68642401286173e-05	2.64248257985128e-05	2.66534190805228e-05	2.31610548018973e-05	1.83217033170653e-05	2.25747690951709e-05	1.90531723205353e-05	2.24639456198562e-05	2.45926285021102e-05	2.2028479153388e-05	2.09168980885557e-05	1.89355672565866e-05
pos_1414	4.44252181290654e-06	8.51425680552953e-06	1.06058280130606e-05	5.87255973595387e-06	2.77903257403155e-06	8.88042792350293e-06	5.0902754262607e-06	9.50519036546963e-06	5.39640316676741e-06	8.23997367213829e-06	1.08536583522035e-05	1.47977859059105e-05
pos_1415	1.00962632234265e-05	1.39767077848365e-05	9.74432823574698e-06	1.33766721863117e-05	2.03520517645275e-05	1.55234300980372e-05	1.55987702967491e-05	1.30098164449847e-05	1.73725105071152e-05	2.06846410137802e-05	1.43451283263212e-05	1.24310471306385e-05
pos_1416	1.95941392294346e-05	2.15490776012567e-05	2.053886257447e-06	2.06806474879969e-05	1.23202706812642e-05	1.45556154669689e-05	1.09096801294586e-05	5.99054979302188e-06	1.99129687168756e-07	2.87668817690254e-05	8.11719767153633e-06	2.09524117012354e-06
pos_1417	0.00372727035375964	0.00208588783256993	0.00229606312251254	0.00142193192308578	0.00111634189418271	0.00153883988076728	0.00178833742837957	0.0016410687015265	0.0019664402654644	0.00152948243871405	0.00153920222350909	0.00218104526261526
pos_1419	5.80926537704282e-07	4.16649503382433e-07	0	5.61097088673743e-07	1.57590578792141e-07	4.52259700699055e-07	1.09832503656776e-06	7.60868640609944e-06	1.05115872883216e-06	1.0193306834001e-06	6.79210217549946e-06	1.48362709209945e-05
pos_142	0.000260933917392523	0.000316028710731955	0.000330874953366578	0.000280656893341279	0.000232463031851669	0.000265509146408973	0.000271853485133268	0.000298372154618967	0.000294922222505039	0.000286142502239049	0.000268102298470207	0.00028395320253425
pos_1421	0.00194937887700943	0.00298057290385279	0.00258016317010493	0.00257125254207051	0.00203883161756703	0.00240836535992201	0.00218715896937978	0.00224942362537646	0.00275121162099079	0.00210398624717277	0.002359164166568	0.00201890870935798
pos_1422	2.50695161742949e-06	2.09143916317985e-06	2.14831770818233e-06	9.70820131563611e-07	2.91470428962713e-06	1.99563974116143e-06	2.51645980768433e-06	1.65445501434722e-06	2.16481332228005e-06	2.84881508724646e-06	1.52734191520034e-06	2.98233361373026e-06
pos_1423	0.000451645536934755	0.000239086105730576	0.000223612594032521	0.000199709308635109	0.000258291427474514	0.000271430259227628	0.000283908063983365	0.000254363297639658	0.000253225245247888	0.000227181418422569	0.000250487190971992	0.000248414064673109
pos_1424	2.61199187498536e-05	3.04675540844145e-05	3.89943592105319e-05	4.04256320262097e-05	3.99108058748449e-05	3.59464789884733e-05	3.76081749306729e-05	4.08795048943768e-05	3.7734694879279e-05	3.61454723192851e-05	3.65117649683873e-05	3.83577528051271e-05
pos_1425	0.000895887155734537	0.000484960962334095	0.00042730325305655	0.000382482872206491	0.000440777250460541	0.000507367032503551	0.000524976442294909	0.000488777860998454	0.000475527515127428	0.000435278333814951	0.000460005126719515	0.00046052840491012
pos_1426	4.55946621097985e-06	4.48234601909865e-06	2.23662808495101e-06	0	1.13876770129807e-06	0	8.87681700629777e-07	7.30840607897929e-07	0	1.5300939836399e-06	0	3.19222856908632e-06
pos_1427	4.80657260613842e-05	9.05271118975394e-05	5.94553037187002e-05	4.30059997401419e-05	6.46634519806556e-05	6.45324593104561e-05	4.146495687853e-05	5.48972544949759e-05	2.99283787918882e-05	9.57284104939816e-05	5.95807425554096e-05	8.05936269724254e-05
pos_1428	0.000274735337700586	0.000325439656776066	0.00014958567199912	0.000213165716057321	0.000316867269241765	0.000260191586113282	0.000378162369558615	0.000272677800874275	0.000195171005299132	0.00026151702435539	0.000265986437914571	0.000197094135900606
pos_1429	1.98406885052625e-07	0	3.64036886042437e-05	5.41765593965526e-06	7.13762865769611e-07	5.94792938132178e-06	1.37749174347705e-05	1.21149173586827e-05	2.07764125951192e-06	4.18241254994777e-07	9.63720132814341e-06	1.47889056684228e-05
pos_143	1.78411908643306e-05	4.77748789948398e-05	2.40252147261781e-05	1.85515719120548e-05	3.57938920748589e-05	2.70576283803588e-05	2.40140879105685e-05	2.31592963061077e-05	1.89432357989266e-05	3.64271560192121e-05	2.26742491684904e-05	2.1171355080781e-05
pos_1430	3.04019721285508e-05	1.13200268662948e-05	1.27021904646864e-05	5.51533224624606e-05	6.0165930369644e-05	2.21702668495888e-05	5.34315531671597e-05	2.23622650244671e-05	8.1694445830069e-06	1.38327138714235e-05	2.21562653149535e-05	6.44357210471336e-06
pos_1431	0.000139478196403485	0.000140232466046002	0.000145264041795434	0.000132751667076805	0.000135631218984116	0.000140809495101008	0.000101994699532006	0.000134225701024944	0.000158291902281442	0.000118750350793208	0.000133975134490186	0.000160657068716216
pos_1432	5.59293455279314e-05	7.65688896979071e-05	8.25044088866702e-05	7.0393814916351e-05	7.42032617588857e-05	7.12186968812788e-05	6.05704270500826e-05	5.95658368497939e-05	6.17093190887472e-05	5.44749631189395e-05	7.04236711333495e-05	6.50439455868172e-05
pos_1433	0.000518425994795781	0.000235444025996873	0.000301407774482569	0.000254614809597739	0.000351826523135804	0.000367281203785349	0.000159529846376317	0.000248133412945093	0.000233289164279591	0.000142679032145728	0.000309627291370091	0.000241269437658232
pos_1434	0.000992764592237792	0.000973770939158533	2.34873176818525e-05	0.000593033460751	0.00105425588001819	0.000695105137800081	1.786934163129e-05	1.93499548715374e-05	1.74591784618121e-05	0.000683988168007077	0.000142304531724802	4.16647037278124e-05
pos_1435	6.86725863378854e-06	5.21884366312044e-06	1.33767283311509e-05	2.86000372497837e-06	4.14455991407715e-06	1.23701968629965e-05	3.45687915362548e-06	3.42366351996854e-06	1.51298485756461e-05	1.48655250576978e-05	2.78613008268273e-06	4.3134747976523e-06
pos_1436	0.000445445989379767	0.000816052949230896	0.000408308757898333	0.000530585405319597	0.000650526124794848	0.000538791657779086	0.000438287992537197	0.000401869125262863	0.000755083222010888	0.000544121038486897	0.000540054385978997	0.000451979850919408
pos_1437	0.00349889040344954	0.00495391871603615	0.0031719960686941	0.00290366999179442	0.0026390831179657	0.00325638390463585	0.00274525396830345	0.00308464343475361	0.00346925739161279	0.00292436426394281	0.00316419591273775	0.00282479567109977
pos_1438	9.73542520159421e-05	0.00010437843257906	3.76651217656453e-05	0.00015091296186761	8.08352729451344e-06	7.10072129077629e-05	9.69744316466603e-05	6.70861878063754e-05	1.17726796441373e-05	0.000158100604737809	7.81340096292719e-05	4.23671815246446e-05
pos_1439	0.000238292316763963	0.000286778574132965	0.000143006439524929	0.000217965631209045	0.000203191968138086	0.000208197110069296	0.000185575992501548	0.000167793897779353	0.000180060744194065	0.000238879577719562	0.000185992082461225	0.00016486322077723
pos_144	7.22908400399026e-06	9.56182153976499e-06	4.45506246763293e-06	6.87363163275651e-06	5.69833954476718e-06	4.77117607453887e-06	6.67674925135422e-06	6.15271632854029e-06	6.53632366628727e-06	7.19579643800773e-06	6.29473807187495e-06	7.4912397116021e-05
pos_1440	9.92559823142782e-06	1.50063257821066e-05	8.17576384341854e-06	1.26223372240964e-05	1.13281987567802e-05	1.05794357146965e-05	1.1412070638197e-05	1.04157601938623e-05	1.29342809857649e-05	1.17552234771556e-05	1.14817231237669e-05	7.96964130449787e-06
pos_1441	3.67945462582968e-05	1.45047963159538e-06	1.29971125837907e-06	1.61094540375955e-06	1.85200085552307e-08	3.57192277937502e-07	7.06569193340622e-07	1.39613412817037e-06	3.06414344504459e-07	5.8290464824084e-07	7.87917344586548e-07	4.87147863099091e-07
pos_1442	0.00047971170460823	0.00045598432015738	0.000505165499736643	0.000463929202416089	0.000325035648823167	0.000443763479555213	0.000372235343578963	0.000424816666680195	0.000508561403829601	0.000382181220930233	0.00042088198656314	0.000381436362981082
pos_1443	1.48026104285618e-05	5.84231531342804e-06	2.23080776978103e-05	3.82790248831603e-05	1.60217276313887e-05	2.04586130487497e-05	4.06747556049016e-05	2.36087572698905e-05	7.22383155703889e-06	2.42155795404148e-05	2.69849913803945e-05	1.44389440195688e-05
pos_1444	5.57019587481693e-05	8.43034361349733e-05	5.26199981646856e-05	7.70092838835187e-05	6.17190958427398e-05	6.18919721666037e-05	6.14017246035174e-05	6.20536332653763e-05	7.3051967367023e-05	6.80045064987503e-05	6.44656616997701e-05	4.69605016144348e-05
pos_1445	0.00130947633871794	0.000540023530760108	0.000448677721101859	0.000457489961339681	0.00090791725863714	0.00091843260165972	0.00102428346833605	0.000732343403528805	0.00063761172322785	0.000731455414957518	0.000767404725912712	0.000758739382340593
pos_1446	1.7382559074019e-05	2.49684940363453e-05	1.94663229958678e-06	1.62744431428987e-05	1.78264609152552e-05	1.34447859824585e-05	1.07028923273481e-06	1.7428096494242e-06	5.75051457643992e-07	2.70433295514558e-05	6.03490324589901e-06	3.22781196473988e-06
pos_1447	0.00156016193484195	0.00146747546184149	0.00169604194534389	0.0019747651947715	0.00121521239066344	0.00160212775828501	0.0021028801180075	0.00328448839939032	0.00156393397906907	0.00154203061915042	0.00270236894317677	0.00629668142426586
pos_1448	2.1986586789826e-05	3.3555346675685e-05	3.84643472431875e-05	2.96412362651269e-05	8.18774435053564e-05	3.46249901711134e-05	3.1339622064845e-05	4.04414218554274e-05	6.18140091466301e-05	3.05969854256309e-05	4.06810974346567e-05	5.30272506197202e-05
pos_1449	0.000103243618503701	7.83937194420573e-05	1.96737453416548e-06	4.51110998867978e-06	1.92272262493809e-06	4.89880844634856e-05	3.78323754798253e-06	3.36367223595415e-06	3.37097580768196e-06	3.3183485001123e-06	2.95540915838002e-06	4.39617167286922e-06
pos_145	2.28982074371825e-05	2.90895867919958e-05	2.99978350687773e-05	2.30648703536848e-05	2.01210731200835e-05	2.64766459691888e-05	1.99496003966507e-05	2.44689026269598e-05	2.21747618872663e-05	2.95228188180133e-05	2.62647899278384e-05	2.62308571327497e-05
pos_1451	3.56497328012115e-06	4.90814608097661e-06	1.86369517319443e-05	0	4.17549076894032e-06	5.42184636354355e-06	0	1.21819993721312e-06	0	1.77536965426426e-05	3.07693996146021e-06	8.10847002664054e-06
pos_1452	5.51703742215851e-05	6.06306328854297e-05	5.6012205209551e-05	6.07470863076723e-05	5.34374185239403e-05	6.14743794270948e-05	5.9223691788947e-05	6.21984171884682e-05	5.35041466488998e-05	6.2921727920686e-05	5.87521091165813e-05	5.90480604124604e-05
pos_1453	1.8306323272196e-05	1.10269284012528e-05	2.53884692892191e-06	7.01990120642511e-06	5.1599383931059e-06	5.95249274722118e-06	5.61448628660907e-06	4.37392946335754e-06	2.76904833344519e-06	2.58362754015176e-06	4.44379067469533e-06	1.82181262946048e-06
pos_1455	0.005156100627607	0.00212783895325885	0.00183007180226311	0.0017323425869552	0.00335436293290007	0.00335250719431764	0.00361139688880948	0.00272336836562363	0.00251631728188281	0.00264730476813082	0.00269549300920425	0.00272828947524702
pos_1457	3.87091255920347e-05	6.00497397677017e-05	4.02110838358465e-05	3.798429600696e-05	5.00701044968743e-05	3.92214519345502e-05	3.90871553295008e-05	4.00773050398752e-05	4.54491040055343e-05	3.75695925809917e-05	3.89317313851007e-05	4.42693179900766e-05
pos_1459	6.64360117622537e-05	6.22507220680008e-05	4.74664267894667e-05	5.17095859048296e-05	5.12544387240314e-05	5.33844626835507e-05	4.46652007767236e-05	4.45609595969707e-05	5.61927392043636e-05	5.33999646576313e-05	4.87146548623488e-05	4.58011059214922e-05
pos_146	9.76625929954469e-05	3.86868543343806e-05	9.24082529346755e-05	4.7513502483356e-06	4.5595000836264e-05	4.65300654160622e-05	5.90603197597709e-06	1.9084844394594e-05	3.08347191768599e-06	0.000101716819404861	1.98022489013428e-05	6.13341037351045e-05
pos_1460	4.54610144685102e-05	4.7945878947958e-05	1.62533822646223e-05	3.25091546576116e-05	3.32445327157844e-05	3.28988709829566e-05	3.17115890652437e-05	2.70860477506513e-05	4.05826510189553e-05	2.20714053374937e-05	3.39689411279222e-05	3.02548413345463e-05
pos_1461	5.3326205846522e-06	6.55618294135143e-06	5.95783836523769e-06	6.96900780441084e-06	4.27802300596761e-06	4.58627987233314e-06	5.12351201604764e-06	3.90733545309731e-06	5.55656203694149e-06	5.42877377159833e-06	6.10279084062323e-06	4.48066913720659e-06
pos_1462	0.000204872605409028	0.000158115370892441	0.000178145241328375	0.000121565580424783	0.00015021976019087	0.000152839495749657	0.000143068379426793	0.000155916786264633	0.000137483439804246	0.000180031572890826	0.000157909877383695	0.000172132959541439
pos_1463	5.85958398674742e-05	8.10545539611924e-05	7.44335507349324e-05	6.62756480912903e-05	5.1769911548028e-05	7.05155332193995e-05	5.84480292511759e-05	6.61591936682468e-05	7.22984296677582e-05	7.18723924305748e-05	6.57101708610646e-05	6.69181100265044e-05
pos_1464	6.21371490972505e-06	5.59250355242077e-06	3.56283271844803e-06	4.81960336675853e-06	8.81003654408211e-06	3.56455484570823e-06	8.37116054566304e-06	6.33727530320368e-06	7.33154072938898e-06	3.69440358058765e-06	4.39168421865174e-06	3.95248606603502e-06
pos_1465	0.000298060808034202	0.000308306461761247	0.000255507953473721	0.000343645639514947	0.000265572853307441	0.000294897199436826	0.000224279408882384	0.000245490462272402	0.000400266181295923	0.000286207950832796	0.000271319978024003	0.000250693841488546
pos_1466	0.000138208544290893	0.000140077398936398	0.000142303178596263	0.000133108624239859	0.00013184946281891	0.000142199695094175	0.000104764816016356	0.000133511589799841	0.000153843530469054	0.000117575990789082	0.0001329006510864	0.000150897844226701
pos_1467	4.28100064905182e-05	4.08901664113575e-05	4.04839096030536e-05	3.98647506577236e-05	5.18461174795863e-05	4.39497742271092e-05	4.45467876320196e-05	4.82523466275863e-05	3.0529355364323e-05	4.39450496795672e-05	3.72028512041229e-05	5.2833171980942e-05
pos_1468	9.60217590147377e-06	4.72139950253401e-06	4.28652942458864e-06	4.66904378281165e-06	5.47798543949841e-06	5.29220971118143e-06	5.38919147097482e-06	5.019325573828e-06	4.89166009573375e-06	5.27248117713613e-06	5.34026852259473e-06	5.17301695293223e-06
pos_147	0.000207236047757252	0.000257736506065935	0.000319044609836735	0.000232549643525521	0.000312166985305371	0.000286686212893575	0.000185098932974272	0.000236633200174777	0.000215253514544818	0.000371931292327055	0.000264588710186816	0.000353301359319051
pos_1470	1.6414578379195e-05	3.34050094705181e-06	2.61887049408084e-06	9.63116209112822e-07	2.13275026856456e-06	2.8342229877929e-06	3.98128342641029e-06	8.63017722765214e-07	1.8263074557716e-06	1.46412049644e-06	1.33541450169905e-06	2.08190489620223e-06
pos_1471	1.46438064256234e-05	1.08812060232341e-05	1.30996860034014e-06	1.00327875855826e-06	3.41974589289367e-06	3.09327903662634e-06	2.30368107020059e-06	9.37266104570808e-07	2.46102018806218e-06	1.4030555041018e-06	7.74752185056753e-07	1.73466085655507e-06
pos_1472	2.52500111470752e-05	3.64373211673396e-05	1.81940356122449e-05	0.000175892880880259	1.69813549502235e-06	2.88221253113965e-05	0.000101004005435755	2.31192071436725e-05	6.87577522896817e-06	4.80485647129006e-05	4.73212504705734e-05	2.05567347971367e-05
pos_1474	0.000212789327424455	0.000281871255343513	0.000161879732851776	0.000140547540676426	0.000188446318716434	0.000193700873417095	0.00016550239970144	0.00016340351707854	0.000144207198226718	0.000139649746321003	0.000155999443904217	0.00018071320645647
pos_1475	0.000105164732454102	9.80306290752893e-05	0.000121108135287998	0.000166621446886194	0.000125492732283598	0.000155859884786584	0.000183840474654909	0.000201857729324394	0.000151906027425918	0.000155001770446212	0.00015254499069377	0.000147274719374718
pos_1477	0.000129005200832969	0.000136502854032981	0.000130971552188565	0.000119017208555818	0.000104093384664551	0.000117494670676946	0.00010933142111952	0.000121708833105914	0.000131408879998542	0.000115871571164218	0.000119016804781645	0.000116414011651266
pos_1478	0.000229329175893584	0.000225211596956495	0.000288900978630953	0.000307627497903921	0.00143351542348622	0.000460757151839451	0.000252330031182567	0.000240728003620664	0.000661342331225688	0.000258406988620117	0.000342820334086978	0.000227824073088706
pos_1479	3.92895756361606e-06	5.30745971183094e-06	9.42881751523334e-06	4.89706594009595e-06	4.18228290751799e-06	5.89383479177933e-06	5.15154685150624e-06	5.68996200318646e-06	5.01558432588958e-06	6.36799650426316e-06	8.55061376521766e-06	6.65166644389425e-06
pos_148	5.90634475165761e-05	6.04671858198486e-05	8.05875774831514e-05	9.48257431033798e-05	4.99388968878232e-05	7.35679929783673e-05	7.71322523439102e-05	0.000112896183002214	3.75915513611593e-05	4.98064658287855e-05	7.90600502633391e-05	7.21872230579102e-05
pos_1480	1.39333330392685e-05	1.24164875430238e-05	1.25431662672957e-05	1.18332864083133e-05	1.38611699571701e-05	1.21679897725406e-05	1.14405555939765e-05	1.19097048775731e-05	1.09242611069736e-05	1.89601134794295e-05	1.1593548923851e-05	1.26539655704281e-05
pos_1481	1.90243330382238e-05	2.27812108930566e-05	2.62212430282011e-05	2.7922854169156e-05	2.64565469560753e-05	2.28599633643146e-05	2.61152140212493e-05	2.30014130240343e-05	2.27791015332917e-05	2.42275709319252e-05	2.46108242613776e-05	2.74332684776845e-05
pos_1482	8.27796422103389e-06	1.90739985362411e-05	2.51577947865528e-05	7.65960812633728e-06	1.00782480373674e-05	1.14407813776991e-05	1.33900549424563e-05	2.39381111218229e-05	7.94592011567484e-06	5.27483766294921e-06	1.72218301650656e-05	3.92852870264968e-05
pos_1483	7.39775912285082e-06	6.9875062212539e-06	1.01852643574624e-05	1.06815058936513e-05	7.41080959072032e-06	9.23814304104522e-06	8.69172842030321e-06	9.67105837336489e-06	6.71805599406304e-06	5.76766521574105e-06	1.07342249392642e-05	1.4678905957615e-05
pos_1485	0.000963368577336913	0.000718579684531306	0.000403209377426308	0.000611554762024493	0.000677079152647821	0.000586276832969409	0.000630690128378299	0.000512212741820121	0.000390623784798205	0.000932277091783391	0.00058931543270564	0.000341436836942071
pos_1487	8.78567505463626e-06	1.28739349931572e-05	9.96350243293132e-06	9.98862382779125e-06	8.19975153054298e-06	9.78438666035388e-06	8.46780995991721e-06	9.83025050377112e-06	1.02430647923677e-05	9.14031993224753e-06	9.40137899578068e-06	9.08912084597514e-06
pos_1489	0.00313916288651984	0.00398619985902129	0.00381742394952307	0.00403161052308723	0.00268540416122214	0.0034613337414954	0.00345418569943483	0.00370945203799495	0.00338335997333663	0.00332229943091989	0.00358739068883766	0.00331794793294372
pos_149	5.37628225912502e-05	8.24045162090828e-05	5.19392129635753e-05	6.21763467805897e-05	4.96988331609571e-05	6.15458774188248e-05	5.80914236245346e-05	4.58661744649823e-05	5.50982688823776e-05	8.12520333572361e-05	5.86455517186285e-05	4.39440256785937e-05
pos_1490	5.52871745009169e-05	6.84348165333377e-05	8.703857841726e-05	8.04692875087803e-05	8.16375693645312e-05	7.42037706044718e-05	6.36482675971939e-05	6.26792758762834e-05	9.15535475530209e-05	8.1867674309806e-05	7.80022969858541e-05	6.79985649733955e-05
pos_1491	1.0119897651374e-05	7.12851333616228e-06	7.66695340153774e-06	6.30255888434136e-06	9.14356625304842e-06	7.1535619553953e-06	7.78568538625378e-06	7.8774049889834e-06	6.80022234885965e-06	8.58216636711882e-06	5.98947364126779e-06	1.06342199621841e-05
pos_1492	2.19480116756749e-05	3.19755118720681e-05	2.98468075325199e-05	4.74733861018259e-05	2.20192127940175e-05	3.34950691699162e-05	2.23721390076129e-05	3.23684760144076e-05	3.29706136245377e-05	1.92240518197116e-05	3.94272120821879e-05	3.21839595528772e-05
pos_1493	5.75915108150401e-05	6.01099723321237e-05	6.12099790902772e-05	6.00545821926813e-05	5.23096092752831e-05	5.91662032177553e-05	6.286621172343e-05	6.6248303263982e-05	6.08126089556001e-05	5.42999132754483e-05	6.46750009206818e-05	5.13654670270111e-05
pos_1495	2.7239912664624e-05	2.85846513104778e-05	1.96528127412068e-05	2.92731877559642e-05	2.09381533267035e-05	2.12336178709015e-05	8.08308470322769e-05	3.70136084881363e-05	3.9404555727847e-05	3.4881334148068e-05	3.97719851330087e-05	1.63648102538405e-05
pos_1497	6.19516993494602e-06	3.22785758487621e-06	5.22372575260606e-06	2.96358556286128e-06	7.93883681957811e-06	6.84888620712267e-06	5.29693059642305e-06	7.70211122500004e-06	4.66206034419028e-06	6.14939604735114e-06	4.84448827393792e-06	2.06314962365794e-05
pos_1498	0.00154321226296999	0.000502798033225409	0.00048198643366335	0.000432273652509745	0.000691663290622983	0.00066024590127428	0.000746646572911972	0.000616933118365105	0.000585960900992651	0.000575049524256641	0.00061983064441119	0.000588275225379627
pos_1499	9.19683321576528e-05	0.000124099672107564	4.12478883768456e-05	0.000105732765702879	3.55194049989861e-05	7.24948791448637e-05	8.56049286429558e-05	7.07155151790364e-05	3.56432085555882e-05	0.000110535630088319	8.02109082118578e-05	4.73955682497099e-05
pos_15	0.000679697857844718	0.000858472194877804	0.000475416156282614	0.000490930418124927	0.000686524604643087	0.000433770694859097	0.00073354935723783	0.000685171865404108	0.000586239526709773	0.000777522421335236	0.000577880334397036	0.000755436383509417
pos_150	0.000192763131508112	0.000206350176913844	0.000128270966574903	0.000563023950820582	0.000204210143487219	0.000238873144141349	0.000593640186752635	0.000448896660910875	0.000149773700879272	0.000925177211819921	0.000554984502064514	0.000216486927404874
pos_1500	0.00033124020237564	8.67547420488175e-05	9.48328940475704e-05	7.83341752839285e-05	0.000188776285416121	0.000190774859724975	0.000168997444165292	0.000150224454754005	0.000109718832698371	0.000129961853244618	0.000145030862158755	0.000136575790919278
pos_1501	0.00190605191067706	0.0013311021915979	0.00155192141578759	0.00199358203114592	0.00148418591938345	0.00222551463266763	0.00172463882022271	0.0015185373805459	0.00173508155807356	0.00160065530332431	0.00215840120028248	0.00143952452784144
pos_1502	0.000117592607182848	0.000155476740368967	0.000124430243566759	9.96551733646186e-05	7.99604501454314e-05	8.16356293165536e-05	0.00011260425675157	0.000141539632725705	0.000199457001047959	0.000139928231633722	0.000145031723297999	0.000144527328613111
pos_1503	0.00160107828365188	0.000728358511860144	0.000707001611785195	0.000612906062581029	0.000782071701454471	0.000831871557622864	0.00087105767926529	0.000768402602682283	0.000755037212256931	0.000717713827677062	0.000782846463758418	0.000760173010304113
pos_1504	7.38949305335764e-05	9.79403143741926e-05	9.49905850998644e-05	0.000102614174409837	7.45802823787135e-05	8.5723039180781e-05	8.42063054668049e-05	9.43247731020852e-05	7.87352046052687e-05	9.55154004910622e-05	8.36975832310842e-05	9.20258778391244e-05
pos_1505	0.000118177169509134	8.73884620356105e-05	9.40016214440017e-05	0.000151910913608394	0.000101940802446945	0.000109612154330245	0.00021184812853473	0.000511539106952053	9.99531879871171e-05	0.000141457727865477	0.000266890892485841	0.00076093931167674
pos_1506	0.000939847354119013	0.000544039790372981	0.000520244460306078	0.00045764104574574	0.000561602080917343	0.000582349583590377	0.000613898926810313	0.000575850963290809	0.000580825702693234	0.00052343245699527	0.00055736473345237	0.000558770061883352
pos_1507	0.00155526959894682	0.0010007284200908	0.000911204910713631	0.000848539298201163	0.000998366486985496	0.00108399403860617	0.00105164158006616	0.000986421926605423	0.00104540165468193	0.000922293938309687	0.000992944075499502	0.000930611546941604
pos_1508	0.000498530076441526	0.000281718992300684	0.000186915051289055	0.000133571647444143	0.000219020988224835	0.000210746920444462	0.000192305612589844	0.000162819423240384	0.000195189995441558	0.000146445622492147	0.000172534761031269	0.000167892930077103
pos_1509	5.1285710602548e-06	3.92383898305321e-06	0	1.24640828015713e-06	2.67611363850322e-06	3.55704313657996e-06	0	9.17865890860539e-07	9.50334006318637e-07	0	0	7.97310652938733e-07
pos_151	0.000756804250428318	0.000737862019337232	0.00126800868245409	0.00104682494616254	0.000800600685462132	0.000947656160026501	0.00133962676675956	0.00117325082031878	0.000708624625387625	0.000946509555845842	0.00109488267053375	0.0009566437225474
pos_1510	6.42549176166961e-05	0.000258766900997378	0.000143091571987829	3.48875474689253e-05	1.86164153880705e-05	9.80390082959116e-05	4.69481804699171e-05	6.50737532526035e-05	5.92339111182418e-05	8.35927026945196e-05	6.12873674816218e-05	9.58426618909603e-05
pos_1511	0.000452984621595739	9.049780146076e-05	0.000111109385859455	8.33759019852527e-05	0.000251093114183514	0.000246923347255092	0.000216610879937505	0.00019577081942602	0.000138500815259053	0.000150031126592963	0.00018147440501759	0.000161289454719068
pos_1512	0.00100036215617496	0.000389735106748937	0.000345306973184229	0.000313856584173827	0.000695383932958468	0.000698937648886703	0.000752736648895307	0.000524128928858591	0.00053085630726788	0.000511000207707165	0.000556353548557317	0.000542118733327973
pos_1513	8.72882580079925e-05	9.33453320689016e-05	3.0602974589997e-05	7.58821820421707e-05	4.89686036088167e-05	6.21549218728722e-05	5.01233684313944e-05	3.90934469985783e-05	2.04472037642368e-05	8.40518385153635e-05	4.93028639168345e-05	2.64299662797725e-05
pos_1515	3.3505787445601e-05	3.42558654384758e-05	1.96189722936115e-05	2.03076257564728e-05	2.05125415776946e-05	2.51346218925268e-05	2.09257406550205e-05	2.32326417302956e-05	3.24863454422449e-05	2.21115084508951e-05	2.6982864646933e-05	3.37852475498052e-05
pos_1517	1.43573833160033e-05	1.41966680311024e-05	1.1009524057577e-05	1.09542792590636e-05	1.24007991957222e-05	1.22123700813334e-05	1.22348578331371e-05	1.09453141585854e-05	1.12793509666618e-05	1.23548163401998e-05	1.08193554738623e-05	1.17028687112189e-05
pos_1518	1.79545154711262e-05	2.05983539136477e-05	2.11712509555619e-05	2.32530515150676e-05	2.02694449756663e-05	2.02506065358722e-05	2.23557233997376e-05	2.10440514564414e-05	2.06442634975489e-05	1.92052523023621e-05	1.87473572378072e-05	1.79084418817951e-05
pos_152	0.000302935150633915	0.000354951659676516	0.000237877699987874	0.000276243528592757	0.000370415801642368	0.000327236369101438	0.000296712847219435	0.000265650767694174	0.000255703986782533	0.00032569825387281	0.000269735498348561	0.000275135280819351
pos_1521	0.000739775453151963	0.000508532880000026	0.000552669162302267	0.00044999139792144	0.000822901104095299	0.00060165492178201	0.000748135988216084	0.000638828051138164	0.000480559470717719	0.000691087389721162	0.000429389103433364	0.000719619712491353
pos_1522	1.77858626200862e-05	4.53097073081658e-07	1.40907827373731e-06	1.23231484394912e-06	8.06467078286858e-06	6.30287054124413e-06	3.48880159467498e-06	2.26998001313084e-06	1.90586330109934e-06	2.44601158664826e-06	5.45788684047187e-06	2.12460372611107e-06
pos_1523	9.85984422473146e-05	4.20973635087766e-05	2.51247022282717e-05	2.14074501152174e-05	4.2851998915324e-06	3.87081265495862e-05	1.98120512525695e-05	8.02993743649772e-06	4.08518285705479e-05	0.000192176802880356	4.43451116017082e-05	1.76293984375643e-07
pos_1524	3.08321877691417e-05	2.73504167772727e-05	4.32974316242995e-05	4.57448797987397e-05	1.7467361949402e-05	2.98656340679874e-05	3.74131948632115e-05	2.88066289829039e-05	7.15485054335662e-05	3.75222609887933e-05	3.80717718473687e-05	2.30410664437645e-05
pos_1525	9.04275346891121e-06	9.76067837167067e-06	6.6960510921941e-06	5.53026156787633e-06	1.01190940769255e-05	6.47366813049021e-06	1.33780050411634e-05	1.03411199497976e-05	7.7777650873554e-06	1.05333546232825e-05	7.8388282003383e-06	1.5000174217554e-05
pos_1526	0.00318087224331394	0.00143405500368446	0.00132416431835951	0.00119438592007317	0.00209202872790322	0.002084593486621	0.00225717812468318	0.00178852783212265	0.00167254559005677	0.00162155728494933	0.00175517548819204	0.00178998331672538
pos_1527	0.00048348993384729	0.000593097460802505	0.00122712310114696	0.000790306756348946	0.000418652037190582	0.000698672639808911	0.00067302857144053	0.000882091723524844	0.000632016229680207	0.00087342472016851	0.000865649591469124	0.00124315097052743
pos_153	0.00577117801889694	0.00552012078055313	0.00496568403988439	0.00523332699076843	0.00403743807541336	0.00494695449536953	0.00594726241609609	0.00515955368850496	0.0047016175546309	0.00606020759701801	0.00508354603304198	0.00460152689799435
pos_1532	8.97341725473336e-06	7.46558908978184e-06	2.14095318087241e-05	4.55114316418157e-06	5.19785136868026e-06	8.75887542032555e-06	4.30929199250938e-06	9.4993215330757e-06	4.95553931704611e-06	1.46768658007626e-05	1.09114343685865e-05	1.765315185793e-05
pos_1533	0.00048262597899549	0.000339142988314339	0.000365537662556899	0.000276775834023216	0.000209684071745277	0.0002853378994442	0.0002287505065789	0.000291480058073916	0.000255296709285971	0.0003118878298957	0.00028909076973166	0.000320231468753871
pos_1534	3.63811072416151e-05	3.77794381751597e-05	3.25636457174487e-05	3.8198469205698e-05	3.45079780121485e-05	3.62583770274909e-05	3.83516385775183e-05	3.8820388195475e-05	3.851614028093e-05	4.01323976587732e-05	3.85132611496119e-05	3.64893783176681e-05
pos_1536	0.000112971069146283	0.000117583351568936	0.000116487037867756	0.000129980674789884	0.00013960918073186	0.000142074178189556	0.00018209420710565	0.00014285371145522	0.000100615914113628	0.000162627956006422	0.000147162877023359	0.000125881617511946
pos_1537	6.69914892044677e-05	6.36161497048928e-05	4.61037335326694e-05	6.25144763898645e-05	5.94923088277146e-05	5.99459165709283e-05	9.76846956783469e-05	7.56896442150788e-05	5.63250255097165e-05	6.3926018000137e-05	7.58366433480132e-05	4.09304236478106e-05
pos_1539	1.13734088023686e-05	1.65022855804753e-05	1.38774773303446e-05	1.22681468944696e-05	1.21602707986316e-05	1.25120490543796e-05	1.16175131893683e-05	1.18434282500991e-05	1.36287740545991e-05	1.08659197155866e-05	1.1960528153888e-05	1.17847489963322e-05
pos_154	1.53299186434102e-05	3.07982392185398e-05	1.13864895241435e-05	5.00329796138122e-05	5.02041982577127e-05	2.89333784342312e-05	1.51556947143601e-05	1.75889247308192e-05	5.25771772526077e-05	2.96697786624641e-05	2.97709003508549e-05	2.85787428666506e-05
pos_1541	8.03977744000692e-05	0.000233285017239768	9.55104707771093e-05	7.36695479603395e-05	0.000171006875732191	0.000119498338724636	0.000102068345515496	9.38328176911695e-05	7.36429791710171e-05	0.000169609945148665	0.000102362622481194	8.94312854291287e-05
pos_1542	0.00155769508502495	0.00156978557554441	0.00226479464203812	0.00268382134059426	0.00321104065553672	0.00244517994331522	0.00195422953728463	0.00258598380515572	0.0029129294238698	0.00237871008952655	0.00258435916069421	0.00272957224881751
pos_1543	0.000645905639795778	0.000512852989242155	0.00043279437335921	0.000463764579150755	0.000448383109395422	0.000493716087517378	0.000456705325816567	0.000475047516547374	0.000632503168250189	0.000362701897901769	0.000493114956877432	0.000472693004670614
pos_1544	9.9706469529894e-05	0.000157503145683247	9.76932032700066e-05	0.000173740420831154	0.00011680264824741	0.000134432222345831	0.000112473275592376	0.000116338775851633	0.000261054580911855	0.000108449144687068	0.000189154125465807	0.000173043998088926
pos_1545	8.19418553666161e-06	1.02227646751622e-05	1.80430203678585e-05	9.10981777012089e-06	7.14304363414474e-06	9.13587373055323e-06	3.89148320799565e-06	1.20158869516469e-05	6.57955046599233e-06	2.26131332784054e-05	1.0006511196837e-05	1.89306803429876e-05
pos_1546	7.91942607584604e-06	5.26074150433464e-06	2.93358432022411e-06	9.57611083174629e-07	3.87515457683865e-06	4.54710221193541e-06	5.38230429134271e-07	5.37294853708217e-06	2.25451138498614e-05	2.09789890090295e-07	9.51978769078453e-06	1.424930432088e-05
pos_1547	7.51153619623032e-07	7.85243725189995e-06	8.6112947525965e-07	1.51726024243088e-06	5.835638015303e-06	3.08582658123483e-06	2.91848659052754e-06	2.28194215380504e-06	7.73887217390713e-06	2.18051813639932e-07	2.6907528660658e-06	6.53723192514468e-07
pos_1548	6.34245424339913e-06	7.59131330330145e-06	5.93302887202048e-06	8.39518789700579e-06	1.41749938591243e-05	1.02325612456489e-05	1.09153552799492e-05	5.57577327042314e-06	8.75806339426587e-06	1.47338926367159e-05	9.91479263874482e-06	7.28223359620694e-06
pos_1549	0.000367409891145014	0.000367570032899753	0.000527167251586901	0.000615208377537651	0.000492369989726271	0.000605351347258427	0.0006787652795462	0.000754160362633074	0.00063395215042419	0.000634031674178458	0.000575665738729368	0.000521891276911758
pos_155	0.00012213912036194	0.000196715811787959	0.000238628403180554	0.000173217714633264	0.00011733676585209	0.000168264943496405	0.000205546423920098	0.00022266117923702	0.000214530516039301	0.000171396089046219	0.000222927567100571	0.000261807355813688
pos_1550	2.79539595785827e-05	4.56161908281232e-05	3.24912946030436e-05	3.2906212295816e-05	3.77281558744027e-05	3.40009802319984e-05	3.38479870213846e-05	3.85907975583936e-05	3.36141330341347e-05	3.10892026501341e-05	3.35292143067039e-05	4.51459649326354e-05
pos_1551	1.43222536176739e-05	9.9166692305305e-06	9.80907695063077e-06	1.0711699056726e-05	1.11747147044582e-05	1.1674018197449e-05	9.96073331806735e-06	1.13530521154881e-05	1.19255985736145e-05	8.4978345703292e-06	9.52819090663082e-06	1.40705334444275e-05
pos_1552	7.88115603720309e-05	7.43497074135176e-05	7.76720233602588e-05	9.4451614577203e-05	0.000184621729597308	9.83062415813327e-05	6.54121329968684e-05	7.20416417522624e-05	0.000123509799300051	8.67427205998138e-05	8.40607794902039e-05	7.26088235135738e-05
pos_1553	1.52042240466445e-05	2.1385675154906e-05	2.00121392070273e-05	1.5655738892449e-05	1.38880521974006e-05	1.71291579595866e-05	1.4145306226956e-05	1.65058002234726e-05	1.79384487764261e-05	1.61349408424922e-05	1.68630124610177e-05	1.51160673238928e-05
pos_1554	5.37432482965262e-05	3.91269092606239e-05	8.93817441365659e-05	5.08065590441961e-05	3.31518934462394e-05	5.9142154771679e-05	2.68664167226302e-05	3.19356723328974e-05	4.10659339223321e-05	7.30159072184593e-05	4.77409933942625e-05	4.36625081931601e-05
pos_1556	5.68570358288097e-05	7.55204542455022e-05	0.000112858389423605	9.10867910581932e-05	6.13776549197161e-05	8.13009142468758e-05	5.96237272303631e-05	9.37503697112992e-05	6.36823545681576e-05	6.63898068995419e-05	8.1408704376118e-05	0.00012709794059251
pos_1557	5.77662575100288e-06	2.7171963813625e-06	8.41618070734015e-06	7.10055688580617e-06	3.67692261918262e-06	4.84818962866377e-06	4.56834538368613e-06	5.20486591640956e-06	2.47426723899179e-06	8.25140318782153e-06	5.29026733233419e-06	8.2192762083177e-06
pos_1559	4.52291617573153e-05	6.69199366195705e-05	5.40081663170335e-05	3.83072052948338e-05	5.12880378651323e-05	5.11608518280147e-05	3.41055032826785e-05	4.36686740832197e-05	3.20186743573651e-05	9.17649619942896e-05	5.2064871285958e-05	6.52605445629934e-05
pos_156	7.12811894446391e-06	8.30617995789254e-06	9.67793316730731e-06	9.17053605149765e-06	6.94861968769878e-06	8.4298782372866e-06	9.53107194706139e-06	9.35614246585868e-06	8.36229886337797e-06	7.84225425650422e-06	8.42453412359562e-06	9.52015685965688e-06
pos_1561	7.7823317372028e-06	1.0755756451776e-05	3.54341407333062e-06	6.81824519820132e-06	6.52400713151173e-06	5.16045248976173e-06	1.82376774281502e-06	1.55746163172678e-06	9.70414945874733e-06	5.39407816811216e-06	9.85455417069282e-07	3.29946266136884e-06
pos_1562	5.52998123354008e-05	8.35900999331551e-05	7.71076759658416e-05	6.75917085917391e-05	5.85715455418072e-05	6.83089129006078e-05	5.41909956212396e-05	6.72299392954742e-05	7.89204526801208e-05	5.59996097694856e-05	6.60484728679815e-05	6.64758600494145e-05
pos_1563	5.3489717754977e-05	5.52650476417317e-05	5.771873224126e-05	5.36763096923107e-05	5.74857116417559e-05	5.87550400700865e-05	4.74861500994766e-05	5.57289557682116e-05	5.99235677002829e-05	5.2478078783406e-05	5.3276188799121e-05	6.33314493040139e-05
pos_1565	1.37123127564489e-05	0.000157504185702642	2.15023568621184e-05	7.21058971178399e-06	3.24780659329387e-06	4.26662476184286e-05	3.32256172629368e-06	3.0226002917432e-06	3.24518959225514e-06	4.27168385839935e-06	4.63718660053309e-06	6.24164561155585e-06
pos_1566	2.8756706294032e-06	1.84229950731844e-06	4.93041664779372e-05	8.9780414563924e-05	6.45383773243398e-06	2.11375178548606e-05	7.71785811276086e-06	8.60559149714214e-05	1.65479972261727e-06	2.97375862164694e-06	3.59207419486262e-05	0.000182906415833266
pos_1567	0.000119561412929794	3.06131066431554e-05	3.51729142747158e-05	2.75569473936721e-05	7.12329626012113e-05	7.12030114746806e-05	6.47135606237066e-05	5.62945285307876e-05	4.58868265638038e-05	4.81228954097824e-05	5.64323372307722e-05	4.89684707958534e-05
pos_1568	2.25109964855567e-05	1.24670446242854e-05	6.34210779782219e-05	2.36354871519745e-05	3.49026475413875e-05	0.000207081889978568	4.95448376511682e-05	5.22044684628868e-05	7.83767194189476e-05	0.000121003083800439	4.72761191163586e-05	3.26091882930914e-05
pos_1569	0.00560832226043319	0.00252651953479776	0.00228334756684678	0.00214102112447971	0.00372575356999332	0.00384294794364622	0.00411461275312139	0.00311287874382986	0.00306148188778012	0.00307684419515744	0.00313868081558733	0.00317269246559547
pos_157	0.000186807393645338	0.000184851268244152	0.000339755768511375	0.000321710656587187	0.000398160022244346	0.00030987087132725	0.000269992956811034	0.000255140015417993	0.000350008319381872	0.000289760727843082	0.000296385993775979	0.000299799945642085
pos_1570	0.000100114132013049	0.000160765651276873	8.471475325333e-05	8.5413747403304e-05	0.00011939130639797	0.000106759916475803	0.000112806718278201	8.95784411701687e-05	0.000127079880750226	0.000119447558377082	0.000103485265467269	7.52315142826712e-05
pos_1572	0.000420899549046064	0.000224995017531134	2.11460843023292e-05	0.000125715761802576	0.000286487559230178	0.000210856228464749	2.27918021040984e-05	2.17310713916936e-05	2.08085554706771e-05	0.000119117176752181	4.83642476357147e-05	2.56210229887475e-05
pos_1573	7.39900254137842e-06	9.00038084332621e-06	6.40463882975908e-06	8.97271510644905e-06	9.1462677708159e-06	7.9687854834553e-06	9.4307195191991e-06	7.78261505232425e-06	7.76847053599923e-06	7.6425795734828e-06	7.43362012332862e-06	8.99414768810566e-06
pos_1574	0.000275395978068345	0.000343749818629357	0.000347686981165068	0.000303482359268216	0.000249104034203198	0.000302505190312165	0.000268626748749635	0.000298911996494173	0.000341659833842891	0.000298256532538179	0.000281607312148153	0.0002828025909721
pos_1575	3.26295050276937e-07	0	4.77564251325971e-07	2.51858530274683e-05	3.44416419811438e-07	2.50355607685478e-06	2.06710705068851e-07	2.20542925337834e-06	0	0	0	8.12528849821173e-06
pos_1576	3.32769288423287e-06	1.95997406956248e-05	7.68887407320849e-06	2.33707958397171e-05	8.25963900193273e-06	1.49599258827055e-05	2.12437561577371e-05	1.43893468558585e-05	1.60306318505991e-05	1.11323847032808e-05	1.41438878615305e-05	1.31674943857454e-06
pos_1577	4.50761190582334e-05	5.3946012978328e-05	4.35945702685142e-05	4.54123496107853e-05	4.88751283236021e-05	4.73416620956311e-05	6.02851497753293e-05	5.47440409860796e-05	4.84007096586657e-05	4.49608579174202e-05	4.88395299688381e-05	4.23926429967971e-05
pos_1578	6.61891043759364e-06	1.24377696659462e-05	1.29877700828047e-05	7.56582027671859e-06	8.31626859677461e-06	8.28111940882954e-06	6.22710686963737e-06	8.90402077392389e-06	1.2415752769592e-05	6.34103807306437e-06	7.67469774468486e-06	8.21658694413479e-06
pos_1579	0.000256889827136537	9.59515759885036e-05	8.76836238098489e-05	9.28368006301119e-05	0.000120384592442054	0.000118150719877655	0.0001386323030964	0.000108918745479981	0.000102712869092841	0.000101762105892822	0.000109342559699374	0.000104498184678378
pos_1580	2.02231513768766e-06	5.85942586300369e-06	8.58159420779866e-06	2.80950331407087e-06	1.48545138810819e-06	2.7675325121469e-06	5.94030257461597e-07	2.42042217029902e-06	2.23592371688657e-06	2.0798195431665e-06	2.58804585484567e-06	1.43492734033384e-05
pos_1581	3.32465260830242e-05	4.43551517234953e-05	6.01573571510839e-05	6.2727860533269e-05	6.77129142431036e-05	5.17899351532141e-05	6.11486570405317e-05	6.72517600660919e-05	5.31740606793428e-05	4.94444347734626e-05	5.47715157364273e-05	6.03420588372879e-05
pos_1583	0.000110538770041842	3.70429024710394e-05	2.62784758635501e-05	2.68874386852305e-05	7.16706232597671e-05	6.11305609306422e-05	5.48430639860791e-05	4.71001467406968e-05	3.36862494711639e-05	4.89989394372847e-05	4.46460300737138e-05	3.97683634499194e-05
pos_1584	1.23919114923134e-06	4.94836916839181e-07	9.24369904152406e-06	4.20005541935442e-06	1.93711057715684e-07	2.14372710224146e-06	1.57377923848678e-06	1.09142629410219e-05	3.79149121931355e-06	5.1121475529999e-06	3.48680807247641e-06	3.48679662782461e-06
pos_1585	5.62217009762899e-05	8.13321018175917e-05	4.98820178578077e-05	6.0507094328142e-05	6.02429590410528e-05	5.4546947671355e-05	5.63384365971026e-05	5.42279572007889e-05	6.06076717451043e-05	5.60964293630448e-05	5.7288828040887e-05	4.42153830561035e-05
pos_1586	5.81811040720406e-06	1.64746524336741e-06	3.98500723253615e-06	3.95224286929608e-06	5.01424239803321e-06	3.92671285420272e-06	5.83190709415525e-06	2.18854206820317e-06	2.49329087224965e-06	4.99696268081312e-06	5.55813578540371e-06	2.25716125548669e-06
pos_1587	0.00799363296520638	0.0095927733102461	0.0161755212895619	0.0130461855660852	0.00968451990832075	0.011164745666345	0.0107797991828605	0.0124917206865548	0.0137371178822304	0.0121838170929562	0.0132692369971618	0.0154726534488106
pos_1588	0.000299001638564793	0.000703678033063322	0.000417483991614722	0.00028324510163985	0.000379281817548722	0.000393596118378069	0.000283097049232954	0.000353047963712016	0.00044327830663772	0.000451968912748708	0.000384619817565793	0.000420544629074801
pos_159	0.000267085998283779	0.000253766721764984	0.000219091532630167	0.000197918336437227	0.000387835709291643	0.000205377130073441	0.00032102722446668	0.000294744358121307	0.000241163630919486	0.000305325728047262	0.000240489970750206	0.000331684523196313
pos_1590	7.35008909937239e-05	4.30822588590672e-05	3.25275798175808e-05	3.20820776024331e-05	5.3054400642062e-05	4.982869749553e-05	5.58784924871053e-05	4.58752345517965e-05	4.26541026528532e-05	4.14271827572827e-05	4.33828638600441e-05	4.19381133903216e-05
pos_1592	6.25832720459067e-05	6.09828200300735e-05	4.0290737017433e-05	4.56346265759407e-05	3.96746818633165e-05	5.83152882311266e-05	3.67073210793872e-05	4.46022484192763e-05	3.06009738363214e-05	5.17871069702495e-05	3.97842748559111e-05	4.75297064523908e-05
pos_1593	0.00358197465816406	0.00206570760671435	0.00195240461451631	0.00168230169400267	0.00194893987871906	0.00198369739311698	0.0021192676902532	0.00193471938099015	0.00202101024305674	0.00180430118109081	0.00187766596805002	0.00190392706219286
pos_1594	2.24607244132842e-06	5.87124758376792e-06	8.17574005933286e-07	4.03714347340454e-06	1.17372832603651e-05	4.56412780325508e-06	8.52291121903629e-06	6.38198627546893e-06	4.30528390121334e-06	3.76614241623263e-06	5.51192736128855e-06	8.33522481992369e-06
pos_1595	4.23587054685506e-05	6.3638303863147e-05	3.3316144929404e-05	4.41608310269453e-05	5.66554328660266e-05	4.34642034285764e-05	5.16042126286092e-05	4.64061093969875e-05	4.06785590786299e-05	5.83688961645769e-05	4.25733788489232e-05	5.14717388543697e-05
pos_1597	3.47221615334842e-05	1.882461933281e-05	1.66573930610963e-05	1.40716601011524e-05	2.13662551688396e-05	2.16912261764233e-05	2.11801862347038e-05	1.8712990434916e-05	2.22659158233891e-05	1.65698598387661e-05	1.6114329415782e-05	1.66601883040283e-05
pos_1598	6.05416001138834e-06	1.13090867963499e-05	1.14109998629875e-05	7.97982561162873e-06	6.5219052401703e-06	7.97527382157739e-06	8.58831762322314e-06	8.75559483236435e-06	9.19343091892664e-06	8.02808948476939e-06	8.56899349422263e-06	7.10598469224083e-06
pos_16	0.000106549323105267	0.000152630676273147	7.66172275526354e-05	0.00011297110099191	9.70269591251537e-05	0.000107730813811139	9.52129694287776e-05	8.83630304853633e-05	7.71409622867316e-05	9.14951771930313e-05	8.44387760788476e-05	7.49904948636808e-05
pos_160	1.25789557762962e-05	9.94107925631597e-07	4.84332043522883e-06	5.73116915222786e-06	7.82004673792524e-06	5.03615710442826e-06	2.20382177434675e-06	4.13421219777507e-06	4.72116212247764e-06	2.32450045588991e-06	4.07072254609721e-06	7.17590743767209e-06
pos_1600	0.000172176001606859	0.00016554193557608	0.000193453919316712	0.00183039845475258	0.000184884400322876	3.45536872216312e-05	0.000148951063190657	0.000156135676987071	0.000223630229684894	5.10408100647003e-05	4.64463013482697e-05	6.93661305190577e-05
pos_1601	1.91593972699193e-05	2.38641258358305e-05	2.05176944393085e-05	2.00825220135139e-05	1.61592030643433e-05	2.06645577475575e-05	1.78624531565596e-05	2.1554358583368e-05	1.96380588935261e-05	1.91167914549937e-05	2.13174024148074e-05	1.75238617953666e-05
pos_1602	0.000680035087823227	0.000767394285518406	0.00094253058130084	0.000731669822805304	0.0011029450373854	0.000761578112811825	0.00113160465649987	0.000843613470129495	0.000631118716047596	0.000694200079269839	0.000748061790490779	0.000824286672404965
pos_1603	9.42844527616412e-06	9.62491307559328e-06	4.53952124822957e-06	5.38136178431674e-06	1.21484453391365e-05	9.29352485376643e-06	1.02377373795328e-05	1.35635712370537e-05	8.97440719709027e-06	1.1760934477947e-05	6.11081150915174e-06	1.46289139893164e-05
pos_1604	0.000244067663619478	0.000174504920762197	0.000162110767413334	0.000147840718654545	0.000164376700427672	0.000181871357062615	0.00018143630882601	0.000172779290581625	0.000178730486502056	0.000159974316871194	0.000175905902776867	0.000168012748777542
pos_1606	9.59560698251885e-06	5.23168316002417e-06	2.80385970353847e-06	1.31654607631304e-06	2.04777327338823e-06	8.31779586635507e-07	2.3061787551492e-06	7.09185036523205e-07	1.20249699866545e-06	4.97258196635482e-07	1.33427229552302e-06	1.54890931039916e-06
pos_1607	5.63174852543907e-05	3.97383309847816e-05	2.43081124628347e-05	2.50765861262354e-05	2.57773574427496e-05	3.28175833933744e-05	2.4018482673364e-05	5.13658638431454e-05	8.91669215447366e-05	1.65611102830575e-05	5.24246728191248e-05	9.4091609529793e-05
pos_1608	1.07641129535574e-05	3.13081450404998e-05	1.55587512672173e-05	8.7036246128396e-06	1.68010559922686e-05	1.54439431194422e-05	1.29240570225116e-05	1.25784390820072e-05	8.46399490718897e-06	2.58095071685192e-05	1.45310466811327e-05	1.21965816923747e-05
pos_161	7.89481005169067e-05	8.4574127444939e-05	7.23647571538107e-05	8.72012637572123e-05	7.52126870360692e-05	7.63658937539096e-05	8.26695658547687e-05	8.29774248967317e-05	7.74996187063859e-05	7.27282872283349e-05	7.70777839100036e-05	8.42936269707808e-05
pos_1611	9.57141780985631e-06	2.51218084335653e-06	1.43977612697394e-06	1.186131088711e-06	2.01588530738649e-06	2.11610292482058e-06	2.35385674181386e-06	0	0	0	1.95313377470013e-06	5.23493790777615e-07
pos_1613	0.000282397329577954	0.000310546816488232	0.000246492109366684	0.000241776326991667	0.000258866032217042	0.000274943898255317	0.000253733056945859	0.000265549431241939	0.000273089548525294	0.000273829267690725	0.000263417352169935	0.000247197607711498
pos_1615	2.97034406782987e-05	4.26751858501643e-05	3.63692192368714e-05	2.93955264217929e-05	3.13123528204733e-05	3.27922837013199e-05	2.96896753278467e-05	3.25527796682084e-05	3.74241661111108e-05	3.10429101299852e-05	3.39212074167424e-05	2.37789398308487e-05
pos_1616	0.000352682469001256	0.000441885432569148	0.000927133460981403	0.000320119474223815	0.000473274608305006	0.000500635966465577	0.000530534624055912	0.000607434605271728	0.000388106533103674	0.000736191326838663	0.000843134583448218	0.000654212290703394
pos_1617	3.16236185059429e-06	6.32058290304689e-06	1.1564157443689e-06	1.85388723885207e-06	1.01288886662699e-06	8.2463432631686e-07	1.21964978334529e-06	3.31712120714758e-06	1.22052989610274e-06	1.46397988794263e-06	1.25639659951134e-06	1.36317017472516e-06
pos_1618	4.19644053786627e-06	5.64650553161975e-06	4.45305040887509e-06	4.04346061968461e-06	4.30605841059636e-06	4.72730808805617e-06	4.60795257094901e-06	3.4334910306479e-06	5.08278708000809e-06	4.29815972667049e-06	4.05802633115663e-06	5.16618888163797e-06
pos_1619	5.47525504728951e-06	7.81402419860919e-08	1.07197648392311e-06	1.22792305766584e-06	2.92375407808484e-06	1.67764641876979e-06	3.09674757754416e-06	2.45883804999262e-06	1.16141578616859e-06	1.4242817037816e-06	1.25534951049541e-06	2.4840527512071e-06
pos_1621	0.000112070737253826	6.61803270347901e-05	5.598866846837e-05	5.14717379069964e-05	7.99001818813745e-05	8.95628874411903e-05	9.22304183589085e-05	7.08732865615029e-05	7.36563586802849e-05	7.17370009932758e-05	7.37749564945971e-05	9.84213880841594e-05
pos_1622	2.98187236064786e-05	4.91203788506302e-05	3.09617375828855e-05	2.43302893985713e-05	2.89325200807554e-05	3.21690000718588e-05	1.54686675384258e-05	2.41575652965338e-05	1.94499274950036e-05	3.70453378319352e-05	2.83226356938317e-05	4.56360140008576e-05
pos_1623	6.35340978612345e-05	3.65764378166219e-05	1.4632278924909e-05	8.28638047619001e-05	1.38549669418466e-06	3.7152147158804e-05	2.15370733757334e-05	1.66368135511556e-05	4.55808533874801e-06	7.99201991972338e-05	2.56321313611458e-05	1.33097198084846e-05
pos_1624	0.000149029000104752	0.000111748707320662	9.76676222075067e-05	8.94228996275647e-05	9.57083184583631e-05	0.000110043152610107	0.000109706340186989	0.000106034933128472	0.000110171355698059	9.71058335463032e-05	0.000104337588335263	0.000101840377035803
pos_1625	4.23279831873222e-05	4.90376901774035e-05	5.89756677415335e-05	5.43774228263243e-05	2.86621710715897e-05	4.09791572549043e-05	3.51921345354418e-05	4.88508148337297e-05	5.18487900872888e-05	4.1125938820292e-05	4.5178908424475e-05	3.98436562606408e-05
pos_1626	0.000128296888814361	0.000134483435930325	0.000141120252279814	0.000144478263331222	9.7014767292097e-05	0.000125317786909469	0.000125557323573814	0.00014256414317575	0.00013297951817512	0.000121466993667867	0.00013285525592535	0.000152999615859303
pos_1628	8.36015418159192e-07	5.3941741910649e-07	1.64095145242075e-06	3.68810805778988e-10	9.68286533483116e-07	3.5112930338493e-07	5.05206278600753e-08	9.03042577753792e-08	1.94429339467174e-07	1.54713062525534e-06	8.09103145323347e-07	4.0622155153074e-05
pos_1629	0.000199023354274727	0.000236699912332784	0.000216916735809925	0.000217102349369922	0.000173328560908109	0.0002131036716824	0.000190920512365926	0.000210697565912414	0.00022232976180513	0.000195410387299717	0.000206533524548154	0.000199014046756049
pos_163	0.000154677524274375	0.000141002155800252	0.000212425013112057	9.04179474058488e-05	0.000149436927734999	0.000143293699323823	9.47509082247864e-05	0.000128508465401547	0.000103563951814578	0.00021802410902794	0.000149826536592861	0.000164095730975772
pos_1630	0.000164965874678097	0.000153469267772032	4.8914318304038e-06	2.62947519467306e-06	5.91474745947369e-06	7.32097858797043e-05	1.67414798942142e-06	0	4.46792369598116e-06	0	2.37792264427274e-06	1.9006238593453e-06
pos_1631	1.66452373578376e-05	1.77956979358661e-05	5.34882567686472e-07	1.23479593262546e-05	1.28909158167391e-05	1.12371211042084e-05	5.92487308046816e-06	3.86411728399051e-06	2.21324170519567e-06	1.39265107170662e-05	7.46050978581358e-06	2.34637703859357e-06
pos_1632	0.0196621530718676	0.012081738598319	0.011386381577055	0.0102584370355734	0.0117196476801887	0.0126345106777243	0.0126860163558693	0.0119041124200605	0.0124022990613122	0.0111396672651146	0.0119575395698322	0.0115861200037584
pos_1633	0.000159379367504349	0.000183401989900968	0.000154698471403379	0.000165046142573777	0.000213731043092909	0.000168610103711334	0.000318394322657193	0.000234845069770126	0.000193238291807224	0.000225713467567169	0.000193225132662388	0.000232211492262035
pos_1634	0.000322314490112389	0.000278986620757007	0.000282167294121911	0.000236713031378756	0.000318645996362427	0.000300117359067059	0.000246096166259851	0.000283695664274312	0.000271489744994839	0.000259739079328867	0.000278558359206925	0.000379298873185858
pos_1635	2.5152093612814e-05	1.1239285310179e-05	9.21100074419592e-06	1.21216878139533e-05	1.84883315504883e-05	1.89497067481965e-05	1.41647722788119e-05	0.00010854589383931	1.44545904383333e-05	9.11434389196969e-06	2.53353333545625e-05	7.58540244361584e-06
pos_1636	7.31393086903216e-05	8.28802015039324e-05	3.43223581016808e-05	7.66851536073604e-05	4.99552057000779e-05	5.95051010062279e-05	6.47811874935401e-05	5.08029551131451e-05	4.75758354564678e-05	9.64038081574031e-05	5.92930485629737e-05	4.00301345873166e-05
pos_1637	0.000380332323064151	0.000564024648187336	0.0004528892472529	0.00047007748517538	0.000350375223114639	0.000516050059095745	0.000432392328253198	0.000508747117818037	0.00048140283866023	0.000391985131396682	0.000515946944796944	0.000426855941264943
pos_1638	4.62082282165642e-06	7.88782391233393e-06	2.27317462473964e-06	3.08029667935298e-06	2.58274211590196e-06	3.28507832294601e-06	1.50005230396757e-08	1.26790864598689e-06	5.47319587381108e-06	2.06197923004617e-06	2.95892353530915e-06	1.23022942247728e-06
pos_1639	2.20375012419654e-07	4.91313685478066e-07	8.09690350823846e-07	1.48391461418599e-06	7.55462601628791e-07	7.10097639153105e-07	1.23799679878923e-07	4.35734484718335e-07	8.42839280149113e-07	6.11823501749816e-07	3.55200149260156e-07	6.26577220993217e-07
pos_164	0.00014429204914987	0.000127758672645708	7.34291006266935e-05	0.000155827395256847	0.000116557046928398	0.000127960021843908	0.000166810355639073	0.000128430077174762	9.60295839375154e-05	0.000279338064091995	0.000154008559841529	0.000104258293628264
pos_1640	0.000156550109802598	0.000209425324660752	0.000265044962585841	0.000216368092922744	0.000189179369953509	0.000208651292711416	0.000158548691953624	0.00021570604149642	0.00020780409084531	0.000180771522158723	0.000203911723894399	0.000263020881431366
pos_1641	0.00109591638421683	0.000639156903715317	0.000876167474293206	0.000808159890270523	0.000717519419663392	0.000831303658877772	0.000931784038154627	0.000904758208538929	0.00062002096435547	0.000761048142123979	0.000824844512144125	0.000861023566658243
pos_1642	0.000188190404887723	0.000250160072430365	0.000232520130119022	0.000218608809766453	0.000177840855389861	0.000210304823669846	0.00019544740465807	0.000217301756970972	0.000227513976616376	0.000199357203463169	0.000212925547718925	0.000204703001142343
pos_1643	0.00136558368433184	0.00112288270810912	0.00110718632956502	0.00117375777808562	0.00137908268799373	0.00143232484508309	0.00209937118917144	0.0015001887296781	0.00108708412526509	0.00168871281252921	0.00162841223424897	0.00143503074960802
pos_1644	2.59582313932326e-05	4.25335591256605e-06	3.3953377746853e-05	1.40747292008032e-05	6.45860166166418e-06	2.26115925714578e-05	3.50285823757499e-05	3.03717792430619e-05	1.4354238348867e-05	2.33296503603823e-05	2.02690464406225e-05	2.22959317961755e-05
pos_1645	0	0	0	0	1.95660208234629e-05	1.63487232297772e-06	0.000172531415981951	0.000102641217331303	0	0	4.96795931878143e-05	2.91251027465481e-06
pos_1646	0.000125093462258903	5.07921955399136e-05	4.5012015369398e-05	3.90102319255918e-05	7.54777202942564e-05	7.74434296426746e-05	7.54167387217144e-05	6.28389542911405e-05	5.53473779009427e-05	5.64819706156489e-05	6.50453480593191e-05	6.27936995694222e-05
pos_1647	9.21157385396969e-06	5.29076884541887e-07	4.10094324177461e-07	9.65395706192268e-07	4.27957049332872e-06	3.10469487821626e-06	3.20387159838713e-06	2.28806570864135e-06	1.81197151896192e-06	1.47898277579508e-06	2.25322985379714e-06	2.42540624836847e-06
pos_1648	0.000100620959773235	5.37207217997651e-05	3.95328431112611e-05	3.89203864234746e-05	6.47860650972345e-05	6.58723650229123e-05	6.95139617916968e-05	6.17906091993504e-05	5.51498049694056e-05	5.59812067694381e-05	5.67666552057748e-05	6.00227758342579e-05
pos_165	0.000353011038432772	0.000256361877136096	0.000247308818224101	0.000215938648237596	0.000239781989303339	0.000248740563352113	0.0002575588917472	0.000250701871704514	0.000255878978663856	0.000247255884769618	0.000249128818532192	0.000250397201886985
pos_1650	4.17754905934843e-05	5.28676126261833e-05	3.16799116959406e-05	5.01418439340297e-05	4.52247893172907e-05	4.24352152758201e-05	4.07413740632583e-05	3.95459796145418e-05	4.40534826420378e-05	5.71261047642463e-05	4.98238509557601e-05	5.31323119719305e-05
pos_1651	2.14796746432432e-05	1.95618571136604e-05	1.22211083507173e-05	3.89402509101125e-05	1.74477180946582e-05	2.10506792101879e-05	1.3345941559181e-05	1.18996835492435e-05	1.2853802632223e-05	1.81956248382584e-05	1.48261488998643e-05	1.63555907943916e-05
pos_1652	3.8222530913392e-05	5.76585430775405e-05	7.74337357029886e-05	0.00012278307452229	6.3028252875321e-05	6.95625012603061e-05	7.64957418204415e-05	9.60198725092242e-05	4.86228360901885e-05	6.12540852279696e-05	7.72818129602872e-05	7.69507790383796e-05
pos_1653	6.06324947033425e-06	8.57988856873519e-06	1.26511166039424e-06	4.53849361562092e-06	8.88643537148372e-06	5.93706403160147e-06	1.60317723886771e-06	1.19583604818397e-06	2.15225514203341e-06	5.84955415754121e-06	1.49648939819358e-06	1.20357869491511e-06
pos_1654	9.06541925384348e-06	1.36964598706159e-05	8.06091432434758e-06	1.27691508060175e-05	1.12247242211114e-05	1.15113795518312e-05	9.3593937336065e-06	9.01917779240651e-06	1.17808246486053e-05	1.1652984602397e-05	9.48864788831384e-06	8.62406407764855e-06
pos_1655	5.18095489239987e-06	1.99381059651376e-05	8.65047908198874e-08	1.32110313482201e-07	3.09477453660808e-06	7.60859794427739e-06	2.14106870653884e-06	5.55643947747025e-06	9.32724645184409e-07	5.64896428912855e-06	9.28569429033314e-06	1.9030771646134e-06
pos_1656	2.36439943498236e-06	3.26678607256323e-06	1.09331147437155e-05	1.88454742719494e-05	1.19126488056312e-05	1.39426664300017e-05	2.71662582380538e-05	1.45823699649534e-05	5.01549469323858e-06	4.46071574390799e-06	1.34455021925829e-05	1.66073311497819e-05
pos_1657	0.000401397362036678	0.000254520483641941	0.000236081385440137	0.000210471899698022	0.000253511225179201	0.000279996516761332	0.000276523317943342	0.0002580631357844	0.000263579714874825	0.000236918093424841	0.000256918566116986	0.000246662623981176
pos_1658	4.55942843215629e-05	2.63921903545958e-05	2.2050409910681e-05	2.27953527641292e-05	1.49432289940826e-05	1.67321665351241e-05	1.66811205257417e-05	2.09247199462063e-05	2.11925019243239e-05	2.08456456676908e-05	1.95824234500931e-05	1.78222028363768e-05
pos_1659	6.6820657276052e-06	7.34377256156783e-06	1.14067538931306e-05	1.03331136015566e-05	5.1197913333794e-06	6.20221546194353e-06	5.45252281328195e-06	6.17834877146806e-06	1.87273852356053e-05	7.74246170525618e-06	9.32337719329765e-06	6.06283283289072e-06
pos_166	0.00076307701483257	0.000606030855513788	0.000416390005206997	0.000520553562459443	0.000328941823073782	0.000537534741752601	0.00063635478459471	0.000671547527114256	0.000367817996141012	0.000714395733712287	0.000608934902311823	0.000744963611385631
pos_1660	0.000105286828510063	9.96814092220441e-05	0.000147530937334115	0.000138883908889475	0.000155579116157586	0.000138370049804309	0.000126742240851358	0.000126276224750595	0.000149533432019621	0.000133685812854779	0.00013598707261168	0.000135547772012717
pos_1661	2.93281299241309e-05	1.09743705561238e-05	1.06105331922654e-05	9.55467889055617e-06	1.72354402308556e-05	1.73349859393937e-05	1.46261285697008e-05	1.38891337057238e-05	1.53588434529149e-05	1.40357306840507e-05	1.29185647853683e-05	1.37897644623439e-05
pos_1662	1.04558333504073e-05	1.1984695330253e-05	1.09375573644376e-05	1.24195061970836e-05	1.01236618399633e-05	1.10536026872802e-05	1.07733449820655e-05	8.79488281743722e-06	7.87724213085164e-06	1.02609217450509e-05	9.17628165015446e-06	7.73941146716757e-06
pos_1663	8.91714440756696e-05	0.000135254985997463	0.000137440983802143	0.000108267423178583	0.00010871552639758	0.000111147003512164	9.35188970788987e-05	0.000155322839693277	0.000135196560297011	0.000103535482011753	0.000139323951338686	0.000260791220035099
pos_1664	0.000178610305347425	0.000229343342415696	0.00074949462253572	0.000139912419704229	0.000281277035256201	0.000324300897435274	0.000394046732472684	0.000447281254579183	0.000183684590320682	0.000574161195527899	0.000706408094896231	0.000584689563430437
pos_1666	4.1687988350618e-06	1.05105567210309e-05	8.47709174694284e-06	1.19597276066396e-05	4.74523764292399e-06	8.95389388389224e-06	2.20692649365523e-05	6.6424215276938e-06	1.40918728939529e-05	1.26929645698226e-05	1.14401285172593e-05	4.71664554004009e-06
pos_1667	6.38718472195445e-05	0.00010097940963295	6.9172858740221e-05	7.86197518642519e-05	5.10903685191579e-05	7.98088908741634e-05	6.71735134628036e-05	6.86728575872906e-05	9.49016911727572e-05	7.34704786407031e-05	0.00011109292306772	9.18798259333791e-05
pos_1668	0.000258673887873408	0.000257763867564519	0.000258717956283284	0.000249819483903825	0.0002451147725585	0.00027173818294925	0.0001946568253492	0.000235988033214815	0.000284115975797601	0.000217513370310954	0.000246629357341745	0.000280649098022003
pos_1669	4.31545741645924e-05	5.0495137192861e-05	4.57364107528493e-05	4.94550253269777e-05	4.0901727250148e-05	4.79685760872012e-05	4.18091555913318e-05	4.25008422378778e-05	5.08048571777306e-05	5.12286675812032e-05	4.69083069423442e-05	4.27234572354362e-05
pos_1670	2.00895816150626e-05	2.30854086036715e-05	3.04226188805094e-05	2.32505355303372e-05	2.51663916528978e-05	2.15299692998726e-05	2.66274400238484e-05	3.27803271495349e-05	2.72583683622384e-05	2.12411641810007e-05	2.88056887052572e-05	3.71119987131265e-05
pos_1672	0.000291185389947436	6.33061966217912e-05	7.16307028178639e-05	5.2854109670935e-05	0.000164696527168898	0.000157700784083215	0.000134494442137282	0.000120773532901511	8.78929733670662e-05	9.73983809162574e-05	0.000113697520208945	9.55453264033622e-05
pos_1674	3.11638858498119e-06	4.75339500616657e-06	1.53766140368263e-06	6.87064121847629e-06	4.26530710484217e-07	3.21610352205684e-06	2.67526520302476e-06	1.48111586792127e-06	3.38703332466646e-07	9.58351085696189e-07	1.05807828428554e-06	3.91072437034555e-07
pos_1675	2.37744363783643e-06	3.25179782042851e-06	2.47359880321855e-06	2.67678013017315e-06	2.22738708530807e-06	2.22936024867083e-06	2.12369467613576e-06	1.58892366632577e-06	3.09479034665259e-06	1.49324905903285e-06	2.2280171737769e-06	1.65074179546724e-06
pos_1676	0.00455336917297641	0.00423234147582069	0.00378564900452259	0.0043546032465507	0.003703951013433	0.00403273216633599	0.00484202130750251	0.00439865903996059	0.00540457427028605	0.00484703067662243	0.00485232555865995	0.00442753570163052
pos_1677	0.000601507552745697	0.000502270632683005	0.000311707435230691	0.000390632577413616	0.000422819375709939	0.000440870720926479	0.000342761895923309	0.000387205561279824	0.000442379615862584	0.000480291983192327	0.000393481335292569	0.000423768395121964
pos_1678	0.00259505628705893	0.00200869499196989	0.00272277037266165	0.00248252757186305	0.00239008605435897	0.00228281277821788	0.0020407739433884	0.0019687490174695	0.00377165027352014	0.00250864961058845	0.00240350856971212	0.0028893461443729
pos_1679	0.000154701973038114	0.000179144084840424	0.000162498498848484	0.000173998486513487	0.000148415600484578	0.000175657608569503	0.000148305006257035	0.000160329562274518	0.000169891187214366	0.000195941432172398	0.000172629777011495	0.000156150243010567
pos_168	0.000190550640218208	0.000231419459599165	0.00020434724361837	0.000207725557289141	0.000175384271417748	0.000194272306153621	0.000192038250146887	0.000209294504265113	0.000205525193680461	0.000207701953229701	0.000202528157514259	0.000193445442489469
pos_1680	4.4591580881838e-05	1.8079348089892e-05	1.51709777008543e-05	1.23774071286486e-05	2.60853649265531e-05	2.70862836250048e-05	2.93140251514539e-05	2.21963362237789e-05	1.95299066203794e-05	2.03275646305358e-05	2.0762318912379e-05	1.96709230697185e-05
pos_1682	2.22671967949894e-05	1.07995588050793e-05	9.96085994029507e-06	9.40445888650934e-06	1.3103687928958e-05	1.33327060926436e-05	1.21744174481169e-05	9.70673931416209e-06	1.32180594271931e-05	1.09994696699278e-05	1.16833902759275e-05	1.16283085334943e-05
pos_1683	1.39101369344688e-07	6.42358860183553e-07	3.32000375378446e-07	6.76143441198811e-07	5.7384249154764e-07	6.12619907773862e-07	3.03772001321601e-07	6.38134804412926e-07	5.27099013389315e-07	7.27011343137818e-07	5.36983903840289e-07	3.29642776497084e-07
pos_1684	0.000187942254127175	9.57895912648183e-05	9.54573529234897e-05	8.37881970874973e-05	0.000103004881969453	0.000108643877830416	0.000111394863164749	0.000103129198244543	9.95144019664621e-05	9.73832374758075e-05	0.000105154847311524	0.000101604695491652
pos_1686	5.32854898021934e-06	5.07211396991826e-06	5.68680025615159e-06	4.76678870174779e-06	4.89957447716534e-06	4.99698372056481e-06	3.71874014091772e-06	4.79386122688191e-06	3.9177818644376e-06	5.7759079185885e-06	4.66911488136348e-06	3.41161419362915e-06
pos_1687	0.000437731545525791	0.000114628770298697	0.000123793442606082	0.000102612008076234	0.00025228018743299	0.000238796969327646	0.000223339341124301	0.000192577602570266	0.00015085698691146	0.000169345726503481	0.000183365425870375	0.000166726001423726
pos_1688	2.43891346815227e-06	3.8044157857758e-06	3.43702715315719e-06	3.12283596439653e-06	3.21470006688795e-06	3.29623300898938e-06	2.31074834124647e-06	3.02918566700402e-06	3.58198376207135e-06	3.65484557545162e-06	3.0639560468967e-06	4.12519911377543e-06
pos_1689	0.000113328607360694	7.22194685705657e-05	3.60631308419172e-05	1.5824099079707e-05	3.97395830252954e-05	4.54513255765654e-05	1.18126750348717e-05	1.81660439951603e-05	1.32601589896243e-05	7.63255723457371e-05	2.84470157921794e-05	2.37498069802743e-05
pos_169	0.000119906615485683	0.000116451307149837	8.84149593907544e-06	7.12925741751359e-05	0.000119241974338063	8.96296971051631e-05	5.9508560456319e-06	8.1738278484605e-06	5.50319443792603e-06	8.62031203040669e-05	2.60203497421662e-05	1.18676738753736e-05
pos_1691	6.1258975942542e-05	7.38651770359333e-05	0.000104377734811213	8.86089405180926e-05	8.71143687048161e-05	7.93717033113129e-05	7.45984130536873e-05	9.30430829314456e-05	9.02108673189502e-05	8.51473906998125e-05	8.88138837160781e-05	0.000115518771348553
pos_1692	0.000182984915513868	0.000326607329891002	0.000200829066037412	0.000201391512007549	0.000120365080148818	0.000186590120578839	0.000181429132854848	0.000207187604677146	0.000159926942036401	0.000184137930710417	0.000198360433591504	0.000194256009945069
pos_1693	6.31972055989501e-05	0.000106161406159333	3.96918083748305e-05	6.88790815217544e-05	8.73076514033346e-05	7.06532950683414e-05	8.89629997357187e-05	5.58802965164961e-05	8.96136341834682e-05	6.3094606849026e-05	7.15463035481279e-05	4.13594405134489e-05
pos_1694	1.89349760503542e-05	2.16578386978095e-05	2.17031219490459e-05	2.2326630218398e-05	2.62741575750777e-05	2.64788092924277e-05	1.78123310548742e-05	2.28772607405822e-05	2.15660713620689e-05	2.90596230220805e-05	2.10902941853741e-05	1.99177824000697e-05
pos_1695	1.97165222729978e-05	2.69008309569543e-05	7.49144555295668e-06	1.25038534481419e-05	1.88684999885434e-05	1.33094382484854e-05	1.70514421616551e-05	1.7306345263887e-05	1.03396743251483e-05	1.41732854488828e-05	1.43930926130949e-05	1.21023252893121e-05
pos_1696	5.95306119265903e-07	2.1837075428064e-07	2.05051050762454e-06	1.25693388165942e-08	1.4314947566839e-06	5.8528271930074e-07	8.37985276855478e-09	1.35545632577128e-07	7.09684337742579e-09	3.07128675833908e-06	8.28763233833851e-07	1.30750998154206e-06
pos_1697	0.000239907155797156	0.000256389762174175	0.000247462343200507	0.000216552557877786	0.000222231431596781	0.000251099311097747	0.000173946784047897	0.000230256179991444	0.000285793036643446	0.000199716749806718	0.000234677036624321	0.000278034148713012
pos_1699	4.82372108923713e-06	5.83657858443786e-06	5.188186654822e-06	5.67058722298253e-06	3.85507325871418e-06	5.17780222293154e-06	4.97105775785184e-06	4.94200981260805e-06	3.99839978333265e-06	4.98981822245919e-06	4.85600069373712e-06	5.46165321853888e-06
pos_170	0.000104892787317473	0.000116527884416833	9.72280796003271e-05	0.000114456048917621	0.000107623206550963	0.000110597291682777	9.13927356322552e-05	0.00010355539564864	0.000112730558342516	0.000100494240704979	0.000111836777785499	0.000126864460914013
pos_1700	8.55052736769193e-06	1.30675658830625e-06	1.0781186028824e-05	1.29684648062224e-06	1.80500997873465e-06	5.17037831069622e-06	1.38214374655663e-06	4.75445879113451e-06	5.71614490860371e-06	2.31907347823757e-06	2.9800153400283e-06	1.11358534014882e-06
pos_1702	0.000218401036935887	0.000215131886060313	0.000547426367213283	0.000423004480919701	0.000152699139260766	0.000297419130424203	0.000201797496683435	0.000178186455521349	0.000476858555883738	0.00047295953284918	0.000300430135384774	0.000211294280544556
pos_1703	0.000528610235528307	0.000628004292676776	0.000405284541434092	0.00050345981880702	0.000459415776139955	0.000502100002725138	0.000515565207520802	0.00044472571926599	0.000463605794168513	0.000587309474454455	0.000472103222714873	0.000429536886496704
pos_1705	0.000109090506091833	0.000120061956872326	0.000103980389631637	0.000106856693638802	9.8285138009341e-05	9.67741039855449e-05	0.000116940920258706	0.000110746208066976	0.000115769523073113	0.000111626262362691	0.000103581576980053	0.000126921212177519
pos_1706	1.38133233370974e-05	6.51815116112446e-06	7.1586707135576e-06	5.8995446184461e-06	7.05194699730317e-06	8.51653061816629e-06	2.72373844841597e-06	1.43391087439973e-05	2.34323822011468e-05	4.89630080061971e-06	1.47742875805196e-05	3.38194569808675e-05
pos_1707	1.75181705053232e-05	3.45639880913016e-06	3.24345650144179e-06	3.68260678371876e-06	1.07336023973126e-05	6.92260415647678e-06	8.74273734922756e-06	5.48056011075394e-06	4.87065629908478e-06	5.94035983644189e-06	5.91860579717586e-06	6.58262454769287e-06
pos_1709	1.80215762227263e-05	1.12998992373128e-05	3.24019917249736e-06	3.24934219614462e-06	7.39459374326103e-06	2.43670719000913e-06	8.3170423297223e-07	2.02252000986187e-06	6.74515129807414e-06	7.79686902947528e-07	3.01600652147112e-06	0
pos_171	0.00015727986599281	0.000152712851748616	9.02602190435668e-06	7.36182320650965e-05	0.000154594245890527	0.000106074078167348	1.20708137270274e-05	9.95783215804234e-06	6.56725330852377e-06	8.77134152610845e-05	2.62328037146796e-05	1.09637230685815e-05
pos_1711	0.000300152717651202	0.000465469675404944	0.000267053870325292	0.000268055353518002	0.000237519444123103	0.000265985471659474	0.000267364582960366	0.000277248394028891	0.000343434213852087	0.000266910605150075	0.000291489320228667	0.000270030568001878
pos_1713	8.28308384472386e-06	8.21797898361499e-06	7.91367859341036e-06	9.89075632430076e-06	1.78821892721777e-06	8.38387125573093e-06	6.96972886713317e-06	9.81934858903561e-06	5.8688189093146e-06	4.60443360702987e-06	8.01368983508635e-06	9.36809835662936e-06
pos_1714	0.000139259416459181	0.00014478183124908	0.000147805661678119	0.00013781714715075	0.000130859305980443	0.000140715246726468	0.000131230049748656	0.000147467977614299	0.000122272856051475	0.000166412727785426	0.000137263917647773	0.000147358391702204
pos_1715	1.73473046639594e-05	7.33345067075387e-06	3.2888562741343e-06	1.19170715825092e-05	4.09904386036592e-06	7.54537595893937e-06	1.47500355124676e-05	6.92949419670757e-06	1.64567148033015e-05	3.08477631543283e-06	3.91576430701058e-06	4.2651089497517e-06
pos_1716	3.80248569577814e-05	3.5827792338234e-05	1.896351725351e-05	3.00234487085515e-05	2.51758806320402e-05	4.0931276313577e-05	2.31967294255918e-05	3.11968740110539e-05	2.32444505552389e-05	2.81144095345592e-05	3.20947290309215e-05	3.42440811760526e-05
pos_1717	1.66838670949737e-06	8.79966780141515e-07	2.24200832169205e-07	2.12106263873587e-07	1.37427532440006e-05	4.14360776614945e-06	8.98484851468932e-06	6.44061340869411e-06	2.01936639575558e-07	1.98573839728502e-06	6.26792862606943e-06	8.94955058241274e-06
pos_1718	0.000204151957317787	0.00029308837063977	0.000152719961908959	0.000215160876792639	0.000213914055781569	0.00021259985310358	0.000196869296751499	0.000178417245076463	0.000199845758243052	0.000222494261459411	0.000187205568352583	0.00016747023700492
pos_1719	1.02065955258591e-05	1.54922334069978e-05	4.05903592204418e-06	6.1451089625676e-06	1.05197468694688e-05	9.62362677719145e-06	6.28314197221827e-06	1.20006473971978e-05	7.88862864007418e-06	6.97651341861615e-06	9.38554148254921e-06	1.50436248439672e-05
pos_172	4.80571804963517e-06	6.57501182818388e-06	4.79334354647363e-06	4.0759749584598e-06	6.47310384576403e-06	5.0600136860702e-06	4.68350431135087e-06	4.79900945552291e-06	6.11354966159747e-06	5.13783025678612e-06	5.17299079707074e-06	5.92733566584872e-06
pos_1720	2.01990518871537e-06	5.27837810689005e-06	4.33462836762712e-06	5.87724486977586e-06	4.84866143431312e-06	3.90289099711463e-06	1.23017882522485e-05	8.21921502245616e-06	7.90830401737774e-06	9.85687455618273e-06	1.02711284390286e-05	9.73017249343252e-06
pos_1721	2.74641391893889e-06	3.06171957188357e-06	1.16573106096352e-06	1.89050128230932e-06	3.22542650478325e-06	2.09032644274083e-06	2.46833646982472e-06	2.59587767055232e-06	1.38330523748287e-06	2.21710088481495e-06	1.46798941475643e-06	3.42252913905054e-06
pos_1722	0.000723560492164848	0.00138000142104095	0.000575575124328803	0.000680178005887673	0.000845579251113736	0.000773889177834578	0.000636987992786188	0.000673486242598312	0.000837907883930781	0.00109979476295091	0.000816408612057262	0.000778739833701833
pos_1723	0.00119387954012124	0.00144539670573145	0.00130432450223398	0.00118667962821314	0.00121437942561365	0.0013385520391035	0.00120801857517681	0.00128655714540516	0.00139000236392995	0.00127272914373688	0.00131393942189509	0.00129081274376345
pos_1725	2.09278170651115e-05	1.77866347355723e-05	2.066835480451e-05	2.46945626260658e-05	1.54578744515377e-05	2.02795948297334e-05	1.92263613040122e-05	2.26595107887944e-05	2.15424660561936e-05	1.72400436838785e-05	2.07912227634211e-05	2.73997442816518e-05
pos_1727	9.04821679503414e-05	0.000142778121411443	0.000112798729084826	0.000127622106124926	0.000190946471749622	0.000146829402707336	0.000152345388507972	0.000140437655710937	0.000196360366588521	0.000142739631677436	0.00012862741897866	0.000109139972527181
pos_1728	3.1253973927457e-05	5.53352825304665e-05	1.73110039783025e-05	2.8660782497949e-05	4.58965045342667e-05	3.16762802406695e-05	2.95474968157812e-05	2.09315669744282e-05	2.41301718757584e-05	2.67104881219098e-05	2.74515183858826e-05	1.60666100073082e-05
pos_1729	0.000460477975257688	5.46566999187526e-05	7.78775591480883e-05	5.37244571722479e-05	0.000223832341738389	0.000208239074909163	0.000168234704179892	0.000141350675403352	9.72705314080921e-05	0.000121813176400878	0.000139212526585238	0.000109209432930639
pos_173	8.53458785707154e-06	2.49977325457512e-06	1.32022284439624e-05	2.59903837379596e-05	9.91070185106767e-05	1.58191376894898e-05	3.42252210938672e-05	1.85448817273612e-05	1.44515947007586e-05	5.62217425128206e-06	1.9057286505457e-05	2.61845901671307e-06
pos_1730	0.000122160156394738	0.000102783544569331	9.36410999714494e-06	7.72639396614687e-05	4.15910803960001e-05	5.93546909192091e-05	3.93272584337605e-05	1.95271151699511e-05	4.27452819437731e-06	0.000124615243745449	3.13432819544717e-05	6.2556614153961e-06
pos_1731	1.06738798745847e-05	1.15815484150759e-05	1.07143239483805e-05	9.82657753352065e-06	1.02039261541273e-05	1.09521855855982e-05	9.61770666655533e-06	9.92204125044085e-06	1.0798769609046e-05	9.87678543414568e-06	1.08839620731623e-05	1.53210974843675e-05
pos_1732	8.85106409143989e-05	0.000128036017580714	6.96146804107134e-05	7.94749403291091e-05	8.75141557608903e-05	8.69732235554546e-05	8.58117430169648e-05	8.73528381648788e-05	8.87386225983425e-05	0.000121995038848819	9.49381564665335e-05	9.33500667641152e-05
pos_1733	6.97649604455309e-05	0.000118918054334656	5.87519406523004e-05	8.49032085951869e-05	9.28438994394634e-05	8.11464359093359e-05	8.65408493380565e-05	6.29523550534195e-05	0.00010480390415649	8.11979254758273e-05	8.43292675508575e-05	5.6631503149427e-05
pos_1734	0.000120289679109441	0.000129352610952777	0.000310030048763818	4.39285279552157e-05	0.000176681802840507	0.000156832984712659	1.94345220119232e-05	0.000120300952077259	4.22464584467693e-05	0.000495184406677385	0.000146619171073995	0.000238236891895102
pos_1736	1.76025123661979e-05	1.96745516466281e-05	5.66569396753066e-06	9.89521327108511e-07	4.35777363985879e-06	5.04821930572054e-06	5.12802522900038e-06	4.95758315793548e-06	8.1266861582023e-07	3.7392416590155e-06	3.31778370109317e-06	2.69219919906764e-06
pos_1737	0.000148593398225745	0.000198570219984799	0.000357885212929226	0.000126700998281548	0.00017790927854759	0.000206813156144413	0.000205867906126906	0.000223593568860273	0.000151475545421543	0.000273486771842719	0.0003120989552192	0.000319114626249863
pos_1738	0.000173512513109574	0.000203409072534852	0.000284738366605009	0.000293013189593312	0.000259895521826315	0.000250190939852955	0.000240084336739703	0.000246857247804157	0.000188740840423079	0.000233580017066765	0.000288842804123026	0.000207299292628006
pos_174	0.000164009331365679	0.000144877219723187	0.000298506519070849	0.000261869952878053	0.000273669812175889	0.000227016698926071	0.00020316124815276	0.000250192623462344	0.000274112947892093	0.00022741640568434	0.000218409261747057	0.000207745621894746
pos_1740	0	0	3.10516390444384e-06	0.000136038485298921	0.000110208977249046	4.76574571455428e-05	9.76445807497481e-05	4.74597848214134e-05	0	1.40695424420054e-07	2.78540437800712e-05	1.30679056632118e-06
pos_1741	6.48178100858287e-06	7.87731590058815e-06	2.024447483173e-06	1.23867316745793e-06	1.13833841050177e-06	0	6.38669320173664e-07	2.06274175985181e-06	9.92690932523739e-07	8.1223137889473e-07	0	0
pos_1742	1.86134104995092e-05	4.59083070021864e-07	1.12156859930729e-06	2.58307188013838e-07	7.77642650391878e-06	4.82202632601587e-06	3.17684267138322e-06	3.1722653757021e-06	1.5235437927964e-06	4.1305583828196e-06	3.92362274270034e-06	1.59580990581582e-06
pos_1743	0.000421483983737816	0.000117269754734374	0.000126901068408755	9.97076822744594e-05	0.000251252286152617	0.00024078451223041	0.000225045432326893	0.00019870752611748	0.000155087160841657	0.000172602395694812	0.000184427367375585	0.000174304974003735
pos_1744	2.0042367151966e-05	1.912729014115e-05	1.38024323060824e-05	1.42244550029976e-05	1.87766807961872e-05	1.6695845563934e-05	1.69860757245339e-05	1.62764597999826e-05	1.7000492216962e-05	1.44482470976156e-05	1.51617883513682e-05	1.59769870502382e-05
pos_1745	2.05546588562757e-05	2.80757907429807e-05	2.51158392249376e-05	2.88665021749051e-05	2.03449707637331e-05	2.49247296832423e-05	2.14322250279891e-05	2.33661190282197e-05	2.75749458446274e-05	2.29097265853325e-05	2.47261699058407e-05	2.05044600755337e-05
pos_1746	1.05578862561435e-05	6.63500953523452e-06	9.44373250376803e-08	4.23725525096492e-06	2.19922765593095e-06	4.79706231050792e-06	1.00266391267448e-06	2.88869275526269e-07	1.00414105924756e-06	1.18349003383332e-05	1.69599212347563e-06	9.74691288409544e-07
pos_1748	0.000739070936396338	0.00116183960014767	0.00264380790903809	0.00159304370610495	0.00079189780045183	0.00130210880700326	0.00144261569257606	0.00202305849884612	0.0016326040923172	0.00116854563934902	0.00187253078554046	0.00274294887137333
pos_175	0.000127133414608659	0.000158654999248865	0.000233831424325996	0.000191350392439507	0.00023402360994505	0.00018472997143095	0.000126836298690216	0.000131312213104527	0.000200241702171412	0.000197950748655216	0.000154993456927617	0.000167317431364636
pos_1750	1.09978091894438e-05	1.55372567130016e-05	4.75281137310044e-06	5.91540828202743e-05	9.50591314915873e-06	2.18367643650018e-05	1.22732788828335e-05	9.44870080200524e-06	1.24066883509565e-05	1.43293494724698e-05	1.43502418701124e-05	7.86946714491023e-06
pos_1751	0.000661553157691906	0.000630050072978549	0.000516548445121884	0.000742423425941775	0.000563058366748869	0.000636529605483986	0.000598009439582229	0.000600191089141148	0.00061852607701281	0.000614228629132123	0.000623088866558912	0.000618937185255966
pos_1752	0.000113989652637459	8.36332072589258e-05	0.000228787805257989	0.000205949191212577	0.000112617429374135	0.000154960946275455	0.000167680094971369	0.000222005564865477	0.000151263216142103	0.000190146395045011	0.000229131317016632	0.000345332814689888
pos_1753	4.56874305413289e-06	9.18583571866851e-06	2.84327179556007e-05	1.53087052737516e-05	1.08193359546098e-05	2.50493870940448e-05	1.53342734409507e-05	2.06351207637483e-05	1.81909928563235e-05	1.90795882782787e-05	2.56460038298737e-05	1.31867230480053e-05
pos_1754	3.19602605331815e-05	3.59250842701231e-05	3.43273145969852e-05	2.72237289541733e-05	3.4475099553468e-05	3.62992743224212e-05	3.03524710854786e-05	4.61372287373914e-05	4.0112370967e-05	3.27035826152421e-05	4.00228058365836e-05	4.00317128071781e-05
pos_1756	4.70374672663128e-05	6.9594716375232e-05	6.00982870780788e-05	6.72387386424992e-05	5.06933921334488e-05	5.24601934783265e-05	4.14457362299246e-05	5.38558900205773e-05	5.90132631709965e-05	5.2904288192798e-05	6.07183519281036e-05	5.4546993435761e-05
pos_1757	0.000105241495425336	0.000117033464426682	0.000123751346033085	0.000211908483617171	9.8242238940333e-05	0.000142694644671408	0.000137941254083015	0.000141043604190917	9.28968389172717e-05	0.000106585986820096	0.000140750806066574	0.000175853202086324
pos_1759	0.000130551985388323	2.11722959424531e-05	2.31648938132097e-05	3.4897716331555e-05	6.87680769013443e-05	6.96039695665301e-05	6.61931306972448e-05	3.86986719732703e-05	2.70285511924143e-05	4.57454149670718e-05	4.88201874703329e-05	3.87963523228917e-05
pos_176	0.000119322834999122	0.000142934495283886	0.000171639029531946	0.000144290531198277	7.26458031238438e-05	0.000128138604692808	8.15383609665462e-05	0.000274872644615187	0.000110640941489071	0.000104680758878439	0.000219111309992251	0.000600404185020769
pos_1760	0.000120135182165868	3.1269855415353e-05	3.26961512607324e-05	2.38873785772441e-05	6.44334322020317e-05	6.09186349871659e-05	5.63109472083788e-05	5.06099153446408e-05	3.87095732925807e-05	4.14673888753594e-05	4.6352226559145e-05	4.67481916997024e-05
pos_1762	7.95496945695739e-06	7.45851955496537e-06	4.97067360893642e-06	4.29911115646937e-06	1.45439763251111e-05	1.05338756974463e-05	7.56400729866278e-06	8.92456278959625e-06	8.09487551359164e-06	4.97150838892401e-06	5.56447009619415e-06	2.34590552457351e-05
pos_1763	1.02259767177147e-05	7.81712782653714e-06	6.08535612786916e-06	6.65926193445824e-06	8.83284695703955e-06	1.01557386802847e-05	8.39573075231249e-06	1.15292204090302e-05	9.08409574175966e-06	8.40621636466778e-06	7.99333995857176e-06	1.08013343938058e-05
pos_1764	2.34567052014201e-05	3.29584618938512e-05	3.66196781243977e-05	3.55868596152083e-05	3.67771965030342e-05	3.17086266847333e-05	3.5414501740554e-05	3.93652513046372e-05	3.41199369491159e-05	3.21597900467577e-05	3.39511193243244e-05	3.79384647407912e-05
pos_1765	0.000652544139941165	0.000701288732228615	0.00107062710001758	0.00130053866685194	0.0015239221223317	0.000960376051699276	0.00126205308689085	0.00128277417330579	0.00103589275897658	0.000825980884544365	0.000944342017465196	0.000807306491957894
pos_1766	0.00091563116451158	0.00139307750880937	0.00160371587296767	0.0016721149434674	0.00395615752349757	0.0020199557564007	0.00137744831170148	0.00135195741958825	0.005077935702051	0.00119257939560304	0.00244435827368675	0.00177157867469447
pos_1767	0.00017822576748854	9.22929767535195e-06	2.16895833397924e-05	1.09838372633736e-05	9.20776557211954e-05	8.83470418727337e-05	7.35067243354207e-05	5.30791607347756e-05	2.57936916498723e-05	5.56448550327602e-05	5.68290887864712e-05	4.49896419985009e-05
pos_177	9.29527433516892e-05	9.40567269680116e-05	7.84459323925632e-06	5.58567045964917e-05	9.63911449398946e-05	7.27452671784096e-05	5.84347274634726e-06	8.20323888911842e-06	6.11422266290188e-06	6.93662648711207e-05	2.28107930156945e-05	1.10735785570469e-05
pos_1770	1.22213565541176e-07	2.23715777754506e-06	1.40623667838907e-06	1.07084689954604e-05	4.82191981642704e-06	3.29404028239673e-06	2.68554004847188e-06	3.79114748749307e-06	6.09589405359998e-06	3.83523135768428e-06	4.84928112242332e-06	4.45156334984099e-06
pos_1773	2.15864136315186e-05	2.36183277511375e-05	2.57258809102752e-05	2.15362683656342e-05	1.85071623132884e-05	2.13869300909875e-05	1.53355544080098e-05	1.9543131176057e-05	2.34004391618313e-05	2.11572659203152e-05	2.13369338575117e-05	2.15424890952992e-05
pos_1774	3.69357506256958e-06	6.33661351734882e-06	5.88386263258845e-06	4.1171188469027e-06	3.55907202572199e-06	4.97719640621853e-06	3.69161138043991e-06	3.83134956079861e-06	4.84300915955722e-06	4.35258038064259e-06	4.79979677862768e-06	3.99688419343959e-06
pos_1777	9.0932478072819e-05	7.37021277532856e-06	1.28989599626927e-05	1.03931652792132e-05	5.05787587224109e-05	5.05751465918503e-05	3.81001427921116e-05	3.66149570509109e-05	1.4690038309292e-05	1.85565994205018e-05	2.52406759868839e-05	2.42092461701424e-05
pos_1778	7.7565567341005e-07	1.11271980472457e-06	2.43511742405756e-06	1.78361646407776e-05	1.67664592645928e-06	4.85681595418129e-06	4.93657809839184e-06	6.68663503766007e-06	7.7329392330319e-07	1.81711386510647e-06	3.9707835475289e-06	1.28922712222103e-05
pos_1779	3.45624171584128e-05	4.93903849502792e-05	3.35843019762062e-05	3.26759247436176e-05	2.79106884762443e-05	2.77104446519265e-05	3.15365409214896e-05	3.28974215514883e-05	3.5424033523577e-05	2.90601550847732e-05	3.3335976533988e-05	3.2761525272162e-05
pos_178	0.000335286039018982	0.000385460469870052	0.000743329172578542	0.000104297563290553	0.000427657609532506	0.000400157379128532	4.31511252653077e-05	0.000277758621299484	9.8086556152395e-05	0.000862693748722429	0.000392855441378666	0.000623827029424629
pos_1781	2.9021360726673e-05	3.29876639221123e-05	7.5777366337567e-07	2.15489884073793e-05	2.86815025615071e-05	2.10782468048016e-05	5.82606866402045e-06	2.63788816008932e-06	3.46742107997454e-06	2.43405496352548e-05	8.17103702515063e-06	2.67110300241194e-06
pos_1782	2.44273669189824e-05	8.26636080585226e-06	6.24928729423117e-06	8.03818541394759e-06	1.46919023410909e-05	1.43686527299744e-05	1.56013634668346e-05	1.05083324624279e-05	1.01758758165614e-05	1.06784708043204e-05	1.20451541881197e-05	9.69331353673275e-06
pos_1783	0.000279038533354788	4.85598159836186e-05	3.83641578176847e-05	3.11866272568979e-05	0.000128811357768203	0.000118444148482162	0.000105552879951898	8.17071782631454e-05	5.92095244190923e-05	6.44547135769943e-05	6.91592821456209e-05	6.30209955801619e-05
pos_1787	0.00100526683187332	0.000614086804970598	0.000530234195210695	0.000525245654618866	0.000553186864046073	0.000640476078125512	0.000609372885423717	0.000597960540329256	0.000610007789450364	0.000542606022091618	0.000582330593401447	0.000600874396306345
pos_1788	0.00276752128088893	0.00079194193092646	0.000789141225298231	0.000735544519799722	0.00121735626887987	0.00116575246078691	0.00140404577113039	0.0010371732859331	0.000940978896031397	0.000940983745232361	0.00102835197846709	0.00104308579782491
pos_1789	0.00173670135870755	0.000546292776914039	0.000488564306150751	0.000490462242661713	0.000769601965354044	0.000758376929346838	0.000946319078359371	0.000703707371337925	0.000638595151243396	0.000685746160597184	0.000726256196144979	0.000714235387738719
pos_179	1.46855057528133e-05	0	2.16488550951972e-05	1.99033731753148e-05	5.09720963919988e-06	1.31947987202626e-05	7.0312011372502e-06	8.31964487240326e-06	2.38723064616179e-06	7.49853684292155e-06	6.69786683141053e-06	1.26755452778363e-05
pos_1790	1.16236010142847e-05	4.89618952298011e-06	2.60841888241088e-06	2.49495247989789e-06	0	1.23891014815486e-06	2.7070604712863e-06	9.06237348942013e-07	9.58325823605224e-07	1.20090390511309e-06	3.02329591633743e-06	1.31577411844522e-06
pos_1791	0.000122434348692279	1.99928171829801e-06	1.01497427155545e-05	4.70201675256348e-06	5.27613460114432e-05	3.74033102108925e-05	2.75416216063363e-05	2.16373586567615e-05	9.48272546839042e-06	9.94522035992775e-06	1.81971444047242e-05	1.21799116608959e-05
pos_1792	1.81567274537633e-06	2.46844927263787e-06	3.69342081991291e-06	2.81234109167332e-06	2.28739998560167e-06	2.1492514289354e-06	1.25346876885529e-06	2.17377511684007e-06	3.20214857970551e-06	1.45968110268748e-06	2.27234711719208e-06	2.05243808246008e-06
pos_1793	2.27775417458567e-05	1.26956796700991e-05	1.16629284254545e-05	1.2048956312164e-05	1.86132207791146e-05	1.89937338336005e-05	1.86918617781086e-05	1.8703175661326e-05	1.601087965719e-05	1.68294611248557e-05	1.47368169611882e-05	1.86911607220098e-05
pos_1794	0.000501287318757429	0.000900538154465287	0.000359428672995427	0.000437299164873043	0.00055529719494412	0.000517474639481919	0.000421398192939336	0.000426830983992844	0.000556658408579359	0.000673585033163359	0.000515841223995247	0.000476055141424907
pos_1795	0.000418816485934457	0.000227843116370226	0.000202863056074225	0.000207981192812023	0.000229724197844223	0.000248416480630155	0.000247448646251824	0.000231205655864724	0.000227048133760822	0.000217691502014069	0.00022532144693185	0.000229773566736774
pos_1796	0.00226004631086865	0.000988975842833614	0.00155640539628691	0.0014578220095188	0.00206272619273655	0.00188678680629111	0.00193269732428273	0.00161043605617688	0.00180586055358262	0.00161813789600939	0.00174263572632141	0.00171647482642371
pos_1797	4.79099202650126e-05	4.07098365451548e-05	2.57609693052612e-05	3.47611516921107e-05	4.21563152961804e-05	4.07252808984417e-05	4.38598177148665e-05	3.47917751362522e-05	3.99146223323496e-05	4.01945676709413e-05	3.49951792975117e-05	4.86103884225934e-05
pos_1798	6.44030748863139e-06	9.0182961545723e-06	1.01352202366171e-05	9.53337405349974e-06	6.8851790412444e-06	7.3981329413254e-06	6.47934049515573e-06	7.40769495709745e-06	8.41225100887304e-06	6.88073914220843e-06	8.1590851641134e-06	7.8472066077226e-06
pos_1799	1.02623627347179e-05	1.39533912637114e-05	1.52789566634557e-05	1.21660489791269e-05	9.15061692391124e-06	1.20997001342599e-05	9.50003609602716e-06	1.05041220189331e-05	1.51376179095604e-05	1.04813763579049e-05	1.23675757693311e-05	1.18931584500344e-05
pos_18	2.5059674096117e-05	2.05771464551447e-05	1.80556187279243e-05	1.91580165072646e-05	2.03206416157462e-05	2.15534316956841e-05	2.14695059927134e-05	1.9903341274391e-05	2.45399453072706e-05	1.62800226911684e-05	1.96545347958101e-05	7.85363457708559e-05
pos_180	0.000261051009976637	0.00031433141842704	0.000279295327645306	0.000312505839364568	0.000261179775814943	0.000288235682776544	0.000256180956054207	0.000283062440105652	0.000338701576292874	0.000291223465759997	0.000301560696604535	0.000281326843284253
pos_1800	9.16700377712325e-06	4.98131910286795e-05	9.06538699226857e-06	7.4361812844962e-06	8.63058449462806e-06	1.63035336499094e-05	8.06769388220034e-07	1.07901083051023e-06	5.10595017161661e-06	9.2823968137827e-06	1.64649293625618e-06	4.96204566475225e-07
pos_1801	1.24617112695528e-05	1.44298784094535e-05	1.33738038861187e-05	1.11627227549141e-05	1.22382946755805e-05	1.21689827657182e-05	1.26873850463375e-05	1.33764992444398e-05	1.49696321101888e-05	1.12042122794441e-05	1.31336686168575e-05	1.03556832573645e-05
pos_1802	6.94972447461493e-05	7.40682498338968e-05	6.15983431038904e-05	8.23755492019107e-05	5.87583835812377e-05	7.39054590596905e-05	6.84223773398651e-05	7.22541206864015e-05	6.64314314972537e-05	6.73076799593883e-05	7.38807187909402e-05	6.7697432078476e-05
pos_1803	7.3423072928433e-05	7.55052064226236e-05	7.12373025757671e-05	7.16127022804521e-05	6.40831991854902e-05	6.78436261148825e-05	4.20768710541711e-05	5.68277208343466e-05	8.81443552623008e-05	7.76926881431378e-05	6.79957019786151e-05	7.05107427117208e-05
pos_1805	5.21293201883158e-05	0.000101521593578776	8.56623636499869e-05	4.95876009278504e-05	6.23936379023866e-05	5.02566900795618e-05	9.63016895922865e-05	9.44177201633733e-05	4.61965526108461e-05	5.02089581889148e-05	8.21834736525927e-05	9.50306239019724e-05
pos_1806	0.000385184996734078	0.000205491738336921	0.000191353502412688	0.000176211655272923	0.000199023448920674	0.000217081361684951	0.000213846347513485	0.000201724522861855	0.000210450664504938	0.000194113281129144	0.000209030980710837	0.000193628631024685
pos_1808	0.000242167546551452	4.06366632505115e-05	4.14686479909091e-05	2.7176086751944e-05	0.000133725997690077	0.000117093150902544	0.0001049441200001	8.70235082674327e-05	5.31203500542044e-05	7.25938140987641e-05	8.13939101896643e-05	7.29389995668773e-05
pos_1809	4.43782497711469e-05	5.52205019654041e-05	4.76637679553783e-05	6.54054825990044e-05	4.11367622080833e-05	4.93062433354302e-05	4.60872186660768e-05	3.84363191846255e-05	6.78072144921744e-05	6.94340682468809e-05	4.97265770749784e-05	3.30134975581554e-05
pos_181	3.93122394914488e-05	6.37941569541106e-05	3.57057377315358e-05	3.99270560785498e-05	6.1392676665506e-05	3.93033270347627e-05	2.57183798920808e-05	3.17361112643395e-05	4.82750469101071e-05	1.92047066357992e-05	3.34101140680352e-05	4.2058865642878e-05
pos_1810	7.62779449984339e-07	8.06509462893727e-07	4.27300177008652e-05	6.07743470926873e-06	1.0559898066231e-06	6.78169024184288e-06	1.85787338865426e-05	1.40879254433435e-05	2.98327363235206e-06	3.07778497463131e-07	8.50461097608078e-06	1.46552803337834e-05
pos_1811	1.18181996675146e-05	2.10541909219676e-05	6.60702972406035e-06	1.01498042014873e-05	1.41728211770825e-05	1.12909311316777e-05	1.15038979731332e-05	9.4450218817416e-06	1.44504346442182e-05	1.65676694248015e-05	1.28705445944625e-05	1.02182552559822e-05
pos_1812	6.31761511484638e-05	5.44026583913967e-05	1.64536333754164e-05	3.78082352215316e-05	3.95302860565324e-05	4.37797159486178e-05	3.02245251531555e-05	2.32644487894956e-05	3.04316996001323e-05	6.56323039502375e-05	3.43995704570414e-05	2.55070269047271e-05
pos_1813	5.72454957552116e-06	3.26604857169769e-05	1.3117135371083e-05	1.96728752545129e-05	6.95758463153017e-05	2.64126778551546e-05	8.38261298123941e-05	6.00295303725122e-05	6.22585069152787e-06	1.91904013730521e-05	4.23860619805084e-05	1.38767754862767e-05
pos_1814	7.97114844209501e-06	5.29944600299884e-06	0	4.06620153865435e-06	1.62208016224712e-06	2.20523172335332e-06	1.21168733167241e-06	0	0	8.16029984253256e-06	2.87034654307352e-07	0
pos_1815	8.92844746332223e-05	4.50319038111495e-05	0.00018279665348197	0.000183718003816828	2.95633812354508e-05	8.33381299334042e-05	2.63016318488782e-05	0.000192617534421654	0.000122591986113484	2.84615227774906e-05	0.000173233576750277	0.000464466733626295
pos_1817	1.40676863905235e-05	2.21521206751895e-05	4.38401597277128e-05	1.68856597627503e-05	1.16663428921606e-05	2.29299507863105e-05	3.00014578994418e-05	3.10066145562298e-05	1.71223757155686e-05	1.2919630997126e-05	2.39867140172656e-05	3.45785278214677e-05
pos_1819	5.12902784984379e-06	5.58367665666403e-06	4.43077800120981e-05	1.63724977987577e-05	1.08445866270275e-05	8.48429036378211e-05	1.89498700718786e-05	2.97049131060438e-05	4.7146383592421e-05	6.21645734533185e-05	2.40267206198694e-05	1.80857377810863e-05
pos_1820	0.000293776266539317	0.000261108258228178	0.000102898963993551	0.000304810735446982	0.000233921772395635	0.000241912534329992	0.000208691657446914	0.000138510136732917	8.86960650881635e-05	0.000133518097459212	0.000131180981887268	9.46055752621127e-05
pos_1821	3.39416661547027e-05	5.62682486984017e-05	4.23137676962804e-05	1.06169848002743e-05	1.6463528590477e-05	2.94157510420876e-05	7.25947193899308e-06	1.44540750761969e-05	1.50468338750919e-05	1.10903338585928e-05	1.31978608859946e-05	2.38204541273966e-05
pos_1822	7.96652387019884e-05	9.70267358950815e-05	8.54200149830693e-05	0.000165207142377339	0.00038181674351964	8.85681205374321e-05	8.64777972966203e-05	8.78406218262906e-05	9.10284578752133e-05	8.38960951768116e-05	8.84991011762871e-05	9.06770755890402e-05
pos_1823	1.44816853046485e-05	2.82334730359694e-05	2.84172494842616e-05	1.17468221179745e-05	2.41309253237203e-05	1.5193994501868e-05	4.31246151748593e-05	3.37855165508547e-05	1.46950874602359e-05	2.59563886615813e-05	2.01261951896895e-05	2.035720121594e-05
pos_1826	0.000375349016531848	0.000221309157888244	5.6569959462156e-05	0.000206591709431079	0.000245856230292932	0.000234145884860547	0.000162585610680252	0.000177212093914633	0.000213261647170761	0.000248661172828877	0.00017857964339544	0.000184387448396526
pos_1829	5.29996927882098e-05	6.19213453831317e-05	5.96877064709682e-05	5.75165517189185e-05	5.40245833311757e-05	5.58579442010288e-05	6.61816488802401e-05	6.12967800149565e-05	6.63289120257442e-05	5.73661574059156e-05	6.18162964604773e-05	5.24794233737961e-05
pos_183	0.000209487815180613	0.000208923617902992	0.000200666247742172	0.000262102787907193	0.000179110533652231	0.000209613131616949	0.000199256224383812	0.000199101214225797	0.000202704330948903	0.000185616111629341	0.000217518864892113	0.000226584446202372
pos_1830	0.000880769040229019	0.00106462527190413	0.00104216894900294	0.00187446539094871	0.00162243467843926	0.00136526858066136	0.00159236038565578	0.00145565643752487	0.000885659808400376	0.000968553005545629	0.00122780988914734	0.000894931948343417
pos_1831	3.2649805806983e-06	5.03352416599201e-06	5.23068747360298e-06	3.89157064663828e-06	1.86191362072863e-06	3.50011161257519e-06	3.29015414159718e-06	4.19888271682618e-06	4.63786592189737e-06	2.77886957619795e-06	4.41515252952794e-06	3.97283302105025e-06
pos_1832	0.00050808026209082	0.000127920664697351	0.000133359215381043	0.000109712733953596	0.000297363345055639	0.000291433332294566	0.000259367486948867	0.00022444273124541	0.000167181041063151	0.000191393761602523	0.000210251631997905	0.000194339433143153
pos_1833	4.57768659351666e-05	3.54200402164468e-05	2.28822135078201e-05	1.45656315496084e-05	1.77280417822524e-05	1.53670280439253e-05	1.6613017082694e-05	1.22990768183517e-05	1.48719286962278e-05	8.95333046315138e-06	1.33626234625021e-05	1.69128485358349e-05
pos_1834	2.64768517463062e-06	6.25310223604237e-06	3.4404814179057e-07	3.76702358034263e-06	1.01149832115804e-05	5.11569007523731e-06	3.41886783988525e-07	7.31359577874189e-07	3.30834818012272e-07	6.07781045097487e-07	4.1644510230494e-07	3.76551337480178e-07
pos_1835	2.51535704549311e-05	2.63232688925491e-05	3.62129539431437e-05	5.19042773729954e-05	3.91335754994398e-05	3.61216095551689e-05	2.74558701475993e-05	2.88560342356184e-05	3.1676019848187e-05	2.85895636406529e-05	3.05586799567012e-05	3.42200894490071e-05
pos_1836	3.20457939447881e-05	3.88756741274461e-05	3.52851613270342e-05	0.00020113064978134	2.30018630560856e-05	2.9142222482522e-05	1.11900094690031e-05	7.10074829563466e-05	0.000183607047098556	4.83897669372865e-05	0.000206297084862995	0.000135733166855599
pos_1837	8.66413325229808e-06	1.22270326948571e-05	1.71316835786575e-05	1.03157062605716e-05	8.0594063418319e-06	1.18846850857517e-05	1.18259017482657e-05	1.10751447789398e-05	1.19616374908309e-05	1.10691972615474e-05	1.29367669447655e-05	9.3077401090876e-06
pos_1838	0.000219076987837851	0.000118719522161429	0.000110821579474404	9.43258947899731e-05	0.000111273660569086	0.000116465936873307	0.00011650868068699	0.000113397848866988	0.000115886153382838	0.000107210330936086	0.000114426456602728	0.000111576610825224
pos_1840	4.01773069758105e-06	2.30725640191827e-06	2.87783483191556e-06	1.81502185936671e-06	4.26788161376076e-06	2.51349680601565e-06	2.56800271779896e-06	2.46851323683173e-06	2.05445566649193e-06	4.20125839127579e-06	2.02503150533961e-06	2.79526878529403e-06
pos_1842	2.21432395844564e-05	1.06702192937112e-05	8.34902446820339e-06	2.14363994591658e-06	1.81171183413774e-06	1.08859272837227e-05	1.89021792065968e-07	1.13532727934514e-05	1.63739987330864e-06	1.54979197464912e-06	7.36815361932153e-06	2.57406045726595e-05
pos_1843	4.22964510294169e-05	5.25493629615794e-06	5.48686405123823e-06	4.48744799518083e-06	2.12678035242103e-05	1.83244679028179e-05	1.87760424050133e-05	1.56910248798796e-05	1.11201167038703e-05	1.31906186550595e-05	1.47764532728295e-05	1.08913563313027e-05
pos_1844	4.75534372355787e-05	8.51019687260532e-05	0.000275359716003577	1.42103319834188e-05	2.36331340806615e-05	7.54562444120095e-05	2.76546945854469e-05	1.7308716180676e-05	2.90238347949456e-05	9.7792605550552e-05	3.18378679725374e-05	5.484068101831e-06
pos_1846	8.65292108336615e-06	9.39914737414905e-06	8.03196264611969e-06	9.46095229737463e-06	8.88633069375188e-06	9.93853587531579e-06	9.17940182173547e-06	9.88094851798314e-06	1.08884927133192e-05	9.36457591678983e-06	1.07421114692693e-05	6.6423905843958e-06
pos_1847	2.48770295543089e-06	4.65141340178657e-06	3.50555198984895e-06	5.32087233800263e-06	3.59607618662845e-06	2.360190042434e-06	2.35807700407698e-06	2.12543587387192e-06	4.38028076702811e-06	2.68643438116944e-06	2.17915068375752e-06	3.73533849508442e-06
pos_1848	0.00045642889853701	0.000237330003857737	0.000213398238886033	0.000207571654112803	0.000298273534707146	0.000306949638217472	0.000332698344978805	0.000280624589015913	0.000262865492297255	0.000279370120252115	0.000275590472635206	0.000344430996801579
pos_1849	8.07793583503549e-06	1.26003435124141e-05	3.73798915093088e-05	4.55679484892008e-05	2.0191087701515e-05	2.24202226763921e-05	1.16690790132747e-05	1.9947000615495e-05	6.62883778362147e-05	2.88967850880732e-05	2.91536988213633e-05	2.797759324207e-05
pos_185	0.00064373954121452	0.000315545584513917	0.000214277476444738	0.0002390688098436	0.000444891344226715	0.000423845788879487	0.000508576216767506	0.000384181467096169	0.000307084251457447	0.00035531993575325	0.000366841992884954	0.000337974722648386
pos_1850	1.04705033960149e-05	1.01489850135547e-05	8.82654668607301e-06	1.81259604747405e-05	7.08275685417249e-06	1.05482961252467e-05	7.75108333072887e-06	1.17598857437999e-05	9.51153336073506e-06	7.15725551598737e-06	9.90340235868403e-06	2.15318758601406e-05
pos_1851	0.000132822540850954	0.000148270299055897	0.000147156947091601	0.000144231827536965	0.000124382819968874	0.000157924283989786	0.000129999555720575	0.000148144097950403	0.000153008966162701	0.000130415001790724	0.000144258234959912	0.000140479249979975
pos_1852	0.000348419551016475	0.000484160568568865	0.000749238937629108	0.000286552803508835	0.000354901179914772	0.000419755899958163	0.000398409710625293	0.000441828083380145	0.000313350365621672	0.000527364655848045	0.000627066713707547	0.000534674310649874
pos_1853	1.90961921195889e-05	2.30898844166812e-05	2.65985683510646e-05	9.05991186210647e-06	1.18574120574159e-05	1.50671975320074e-05	8.40743874852833e-06	1.40489944380899e-05	6.51696906743386e-06	3.12511041656452e-05	2.01246883759551e-05	1.80423143656985e-05
pos_1855	5.11299896581051e-06	1.04392103619159e-05	1.86298810762523e-05	4.48820615235947e-05	0.000116155780070843	9.34153303326884e-05	1.29941849011675e-05	9.69744227236938e-06	0.00014418193024676	1.34126875042269e-05	7.7054992247146e-05	1.40789426193632e-05
pos_1856	0.000238543959102406	0.000252549670350144	0.000201369907420874	0.000185897259181561	0.000175250161613544	0.000204244268074264	0.000231861562041354	0.000232384991348686	0.000210949506964022	0.000188952089138042	0.000206889615463226	0.000184299975882561
pos_1857	0.000207241032433704	1.91728127179022e-05	1.60481104108214e-05	1.06989384326274e-05	0.000286548118717452	0.000106611725781386	0.000440589993149029	0.000337675903058598	9.7349183604498e-05	0.00028077190391138	0.000269232889687937	0.000241362338933146
pos_1859	0.000532816607614986	0.000137802050249471	0.000146580377165243	0.00011905315023161	0.000308843925864103	0.000303483992491548	0.000278530361629373	0.000243935419697271	0.000185418526834008	0.000207049766843209	0.000232837033365943	0.00020991619945318
pos_186	0.000249903670483553	0.0003291033527194	0.000316805583261269	0.0002672664616519	0.000234287594227188	0.000272871991009683	0.000251248727081232	0.000293123479153476	0.000266099786300316	0.000285103163744463	0.000291257094476047	0.000273925889420618
pos_1860	5.36194776305766e-06	9.59947985395949e-06	8.21079980613258e-06	6.30663737391549e-06	3.76773739213682e-06	6.67982246669361e-06	5.56944669359989e-06	5.19487600988901e-06	6.14839577525948e-06	4.70848474358245e-06	5.74903842035625e-06	4.40890537639447e-06
pos_1861	1.91343086496616e-05	1.58963837871072e-05	3.92105184237952e-06	1.9927297555419e-06	3.60979011439667e-06	3.09993471116805e-06	5.10480013278946e-06	4.77580828205097e-06	2.19311903681972e-06	1.97813556556714e-06	2.08182361169291e-06	1.23450433978481e-06
pos_1862	0.000195685648717073	0.000115280054291874	0.000111975710103413	9.94459823802204e-05	0.00012463692319795	0.000137238802980992	0.000152082456062925	0.000136267743164824	0.00015008577301288	0.000120539980208193	0.000117928206878564	0.000140903826509261
pos_1863	4.36797697104276e-05	4.94213275830597e-05	7.93597909097052e-05	3.95943898380715e-05	3.98482286667636e-05	5.13414756187831e-05	3.37179585462918e-05	4.52252285564801e-05	3.75497433399768e-05	8.31620588674587e-05	4.62060941584418e-05	5.17439796004807e-05
pos_1864	0.000477851443701027	0.000292116754349483	0.000287848421160282	0.000262013726027366	0.00029247581345377	0.000332341130110216	0.000337392064467322	0.000324297898022127	0.000323359637407932	0.000295850628928937	0.000308112283681169	0.000297290257072991
pos_1865	1.74251640526998e-05	4.30335723769222e-06	7.24375830260851e-05	6.83924884790294e-05	0.000189939649822443	6.74116426341473e-05	5.86976414825567e-05	3.45202913937273e-05	0.000103227014331044	6.70504966670438e-05	7.36960862036011e-05	6.04933197411385e-05
pos_1866	3.48805519089673e-05	7.36515745014983e-06	8.58274188024672e-06	3.51491826280872e-06	1.24038208235677e-05	1.44031629532757e-05	2.82425675287365e-06	5.65700513800528e-06	3.20677413021196e-06	2.9531056483882e-06	8.08796722486222e-06	5.79598025086132e-06
pos_1868	0.000169407912439368	9.17935869360749e-05	3.28116853793894e-05	8.13076425328247e-05	3.13708816441336e-05	7.4638936097628e-05	4.54578118789696e-05	4.13982214541523e-05	4.61003280706009e-05	0.000205342119397906	7.62087253477864e-05	4.8671607652025e-05
pos_187	3.4978166851647e-05	1.76177127601099e-05	2.59090717553542e-05	1.53408116321071e-06	1.52575685264162e-05	1.39391178041244e-05	2.11893756682834e-07	6.43075667347016e-06	1.00520447467019e-06	4.81004718336389e-05	9.2403979987654e-06	2.72738989053438e-05
pos_1872	0.000122898251414371	0.000154331308628527	0.000136456291763261	0.000133277857875635	0.000127381631771754	0.000138924162621536	0.000117959128973294	0.000125259534281989	0.000156307068957504	0.000109776439741095	0.000134962612325546	0.000142424888348292
pos_1873	5.37056926179794e-05	3.38183559650815e-05	6.5089136020914e-06	2.91189895098786e-05	4.08540143258882e-05	2.85592028570444e-05	1.19121087403973e-05	8.63384731051796e-06	1.01018745243659e-05	3.93587871638971e-05	1.37538366960678e-05	8.96939489082515e-06
pos_1874	3.84874219146559e-05	2.98795644263889e-05	1.68230319433694e-05	2.31391146064446e-05	2.29437073957809e-05	3.35272376636528e-05	3.32330072672231e-05	2.31313664949635e-05	1.95991335248957e-05	2.9589022535689e-05	2.53374185079077e-05	3.91024085339217e-05
pos_1875	0.000321769494594104	4.55394591818622e-05	3.99310694778268e-05	4.07728842991283e-05	0.000153477667063586	0.000148276061902861	0.000114247278352166	8.39405257136697e-05	4.41084486017371e-05	7.23045491770086e-05	8.04452018521303e-05	6.88633088734392e-05
pos_1876	1.51914396233899e-05	8.84029485166375e-06	2.18277155739451e-05	1.78499448690112e-05	2.46919725145635e-06	1.20402017821468e-05	9.32890528082435e-06	8.53743634395508e-06	6.28904353379302e-06	3.56313439779402e-06	1.15408746058953e-05	8.07690802173327e-06
pos_1877	4.19735032777377e-05	3.84090468112887e-05	2.19137536897679e-05	3.75527428666188e-05	2.96926505206843e-05	3.22957082162594e-05	6.11479702723905e-05	5.67899374111139e-05	3.54110472094531e-05	6.57971778770263e-05	4.73116385046316e-05	6.00754296054173e-05
pos_1878	2.79921133933176e-06	2.64195719880272e-06	1.49592524057624e-06	1.1630285569869e-06	6.40538748190744e-06	2.16521993632177e-06	2.10830993248764e-05	1.06088306992744e-05	1.20814007541974e-06	1.09936800026234e-05	1.58349182974329e-05	7.70444353794624e-06
pos_1879	1.18822384149492e-05	2.45160549810586e-05	1.99056614388159e-05	2.14489787316075e-05	1.46604925081418e-05	1.90429023459422e-05	2.05340990150392e-05	1.6368358705574e-05	2.09686258269192e-05	2.53028507636978e-05	2.46609552221435e-05	2.40307595272882e-05
pos_188	5.02243212753483e-05	8.57321255893612e-05	0.000128866015966484	0.000113169510207808	8.1872590999019e-05	9.26379843735886e-05	6.50443652376988e-05	8.81511729233323e-05	7.21410860377687e-05	6.45535509640268e-05	8.04772941601401e-05	0.000109711442949573
pos_1880	0.000300382686781557	0.000351333638397156	0.000335808214146301	0.000424817173192034	0.000356708664632436	0.000354916456006169	0.000351550840764704	0.000330765053852649	0.000382194403070598	0.000331866015108443	0.000315657609215568	0.000234473050345133
pos_1881	0.0146605944639966	0.0196004426935957	0.0147763987766176	0.0170699912854881	0.0130739883438543	0.0170806006182452	0.0141215871450358	0.0163151220223048	0.0189226233069434	0.0151526120308055	0.0166762294377603	0.012708989570621
pos_1882	0.000600385099403999	0.000613447060791648	0.000613722141896291	0.000378178675627813	0.00052815791301476	0.000603263612760782	0.000302368622407031	0.000552285504631489	0.000849166638828303	0.00037684714950454	0.000569490568498356	0.000916967952098008
pos_1883	7.10283099679514e-06	7.85031714985735e-06	7.32404934443545e-06	6.92374781121181e-06	6.10549485097133e-06	6.72893045230431e-06	6.62403303344139e-06	6.63318818753565e-06	7.92065944733279e-06	6.40004069848746e-06	6.31140065179e-06	6.15569353722852e-06
pos_1884	0.000145339029515776	1.40209311263639e-05	1.58916567909615e-05	1.1033769308921e-05	7.91556201108646e-05	5.40564881099323e-05	5.60910655539934e-05	3.97421439750373e-05	2.04563411825201e-05	2.98100644303512e-05	3.01666840903204e-05	3.65177212592981e-05
pos_1885	6.1967426161066e-06	9.09721323088739e-06	5.48110285369143e-06	8.25355837979242e-06	7.15969631700574e-06	6.34345642189667e-06	9.45251022014605e-06	6.98958141751179e-06	7.89574530565825e-06	5.81967851394129e-06	6.55453635948191e-06	5.73226634176144e-06
pos_1887	4.9550189732132e-05	7.98154300433005e-05	5.11860923515612e-05	4.65369378386832e-05	5.60982961821115e-05	4.9949659542925e-05	8.56447392562329e-05	7.42307517431072e-05	4.58884276753859e-05	5.09832152626698e-05	6.78811868076883e-05	5.91536720364751e-05
pos_1888	3.01386712666339e-05	5.40038178010607e-05	4.78373524626097e-05	4.07208032761835e-05	3.5364194032039e-05	4.52829074759436e-05	3.61276211745353e-05	4.4888303341361e-05	5.69258942153764e-05	4.22672931571562e-05	4.18842280787776e-05	3.91414093765988e-05
pos_1889	0.000133799114460643	0.000192550682729663	0.000174744564697065	0.000153356147810821	0.000136427020189274	0.000157880714294325	0.000157484000505971	0.000156488232008712	0.000178473767624696	0.000150818917145546	0.000144398243084318	0.000147716268628443
pos_189	6.02527411205878e-05	0.000191717232958813	0.000138603443740746	3.58150164075961e-05	1.34149303000417e-05	8.47721333403703e-05	3.45505899078211e-05	3.61713476141253e-05	2.37802965140885e-05	0.000136440383239046	5.06090222973678e-05	3.67845727214878e-05
pos_1891	0.000279503929559622	0.000105102869113957	9.68991924865246e-05	9.17019414097382e-05	0.000129593595841726	0.000132596651952638	0.000150593835817696	0.000124516143924237	0.000112783601138514	0.000115424855369849	0.000122264269026927	0.000120778604176657
pos_1892	1.27824179754574e-05	1.20502880933244e-05	2.22714960691813e-05	6.64729764461047e-06	4.4540443394335e-05	2.01646237064945e-05	4.19098357006188e-05	3.48563195236227e-05	1.23743473636353e-05	3.97914996106718e-05	3.1915986322656e-05	3.30955921979514e-05
pos_1893	2.62662318812692e-05	3.19623384376055e-05	2.9609456919924e-05	2.65341701097922e-05	2.35820136609035e-05	2.6581858896287e-05	2.50257181257686e-05	2.55141154817294e-05	2.95510427657528e-05	2.52517048892366e-05	2.68552428403513e-05	2.41607022457286e-05
pos_1894	0.00271842813609266	0.00317422551682698	0.00238131815377766	0.00298835816244602	0.00235411601952061	0.0024139222719569	0.00212992903861921	0.00219841098038403	0.00273402001687506	0.00222939130271802	0.00252620170869663	0.00228296407589385
pos_1895	9.20638121374917e-07	1.77092920985009e-06	4.29691165464405e-06	1.80472277674227e-06	1.36859838490032e-06	2.3345174884994e-06	2.19373599677917e-06	2.06263854088426e-06	2.09121532420964e-06	1.96196238791097e-06	2.65850130128806e-06	1.48358111761689e-06
pos_1896	5.70509514790489e-06	2.080286302458e-05	1.0014141656536e-06	8.65496524987746e-07	2.79272530432352e-06	4.7725883584028e-06	0	1.46376495364347e-06	0	3.03101046567287e-06	1.87841296235361e-06	1.04183849458684e-06
pos_1897	3.38499430355422e-05	5.45126039171563e-06	2.3242123993819e-05	0.000304749959923254	3.20029896290795e-06	6.77758547840616e-05	2.46007615857704e-05	3.66596476083036e-05	5.66897629908805e-06	1.41668732791946e-05	2.83203343616589e-05	6.0810608257061e-05
pos_1898	5.642284929301e-05	8.62067304939466e-05	0.000247896859520216	4.70501638659576e-05	0.000110763223856392	0.000122187301134695	0.000128641170721635	0.000139986729184714	6.69299489325627e-05	0.000198096920080098	0.000233127377764849	0.000263253589638172
pos_1899	1.19213902522001e-05	1.17015607027979e-05	1.12151515883082e-05	1.23708602862353e-05	1.2795645856073e-05	1.27251366028077e-05	6.91123286441066e-06	7.84265873337014e-06	1.52353829006076e-05	1.14299260964761e-05	1.22399272377404e-05	1.04039022995409e-05
pos_19	0.000754628799211186	0.000689185942934045	0.000750556103184053	0.000621720538083001	0.000592356481098528	0.000797793232519584	0.000725419231660012	0.000700631676020376	0.00081862163465382	0.000756055464885327	0.000778064113374993	0.000777630754093582
pos_190	0.000545204300247028	0.000353798051885545	0.0005061831348606	0.000495874049657757	0.000299944515356895	0.000467596168335896	0.000339283339385255	0.00037649492751046	0.000284576462966253	0.000275214110136873	0.000487094802511239	0.000449220664709464
pos_1900	6.72733902283146e-05	0.000100115290555478	5.35039802318278e-05	7.446678574823e-05	6.40790461219009e-05	6.68002800462343e-05	7.09084368705511e-05	6.10700957073848e-05	6.24281347757275e-05	7.47466513543505e-05	9.79081453429503e-05	5.15757227541451e-05
pos_1901	5.55280073315982e-05	7.48858238438787e-05	4.87660089169946e-05	5.70357538647828e-05	5.55404620180546e-05	5.30548255524653e-05	6.14141822401016e-05	5.59347345288305e-05	5.62800939656655e-05	5.52260413849149e-05	5.51557872303681e-05	4.7561240957276e-05
pos_1902	5.52059532889937e-06	4.96674919147518e-06	1.63917689020252e-06	4.16438822473417e-06	6.3949279062178e-06	4.37099854969071e-06	4.8303268503691e-06	4.20287869903565e-06	4.08526353596306e-06	5.91479793466062e-06	3.63602485900873e-06	4.80014953387578e-06
pos_1903	3.17200811460363e-05	3.05114252440815e-05	1.50766246608634e-05	1.84251653178494e-05	4.33383379188747e-05	3.54028123822028e-05	3.20385233819809e-05	2.24879592667725e-05	2.96254241263195e-05	1.74549533845537e-05	2.67792413975358e-05	1.98393828470214e-05
pos_1904	1.87766409880479e-05	1.83875779879536e-05	1.24145871789618e-05	1.53436541184723e-05	1.64412058384966e-05	1.3506173089652e-05	9.3103330168534e-06	2.2536110288283e-05	1.35935557105537e-05	9.33605066108909e-06	1.77229168107357e-05	1.44932792586674e-05
pos_1905	0.000413274830484313	0.000258791020114456	0.000209965043247201	0.000241806277349171	0.000295092503158559	0.000291515972432752	0.000306866111918839	0.000289983834997495	0.00060072978905	0.000174622660577447	0.000334780957474246	0.000260394467729121
pos_1907	0.000125055143019783	3.53104599891683e-05	3.54029029639712e-05	2.83571267390091e-05	7.58997668875713e-05	7.1130594358771e-05	7.05046535778113e-05	6.23363034920216e-05	5.07468841702161e-05	4.84920113849488e-05	5.86937742520264e-05	5.18316757536237e-05
pos_1908	6.62961648231401e-05	4.15257327742404e-05	4.12751908370587e-05	3.20705248359784e-05	3.46795220020815e-05	2.65541554270807e-05	2.31711022761307e-05	1.52433673859452e-05	2.94412644439757e-05	2.38587833094869e-05	1.88076684602546e-05	1.81368316413224e-05
pos_191	0.00554351973029737	0.00571596478492247	0.00368682698774621	0.00777895726917029	0.00695663621137438	0.00655274581861659	0.00492967113784619	0.00535610215235919	0.00684328706256829	0.00559686117797696	0.00636412168836654	0.0049261333355405
pos_1912	0.000403893034863225	9.97300755453373e-05	0.000121432305972942	8.97063878801197e-05	0.000233419186266953	0.000235571982419755	0.000206801254025396	0.000186213003935038	0.00015019005574806	0.000155867953299674	0.000175029618031978	0.000162786888003209
pos_1913	4.45778072659227e-05	1.26206588659166e-05	9.25099977192354e-06	8.75760792785651e-06	3.49643113532501e-05	2.7003416082868e-05	3.07055082640842e-05	2.35458784096291e-05	1.6103884216685e-05	1.83361507455985e-05	2.31644860122834e-05	2.02342464515656e-05
pos_1915	6.38221313054648e-05	1.57963597609369e-05	6.86080281406071e-06	6.36254267756249e-06	3.06569246034305e-05	2.83017395418819e-05	2.1797171804062e-05	1.47873848898957e-05	1.49972726156039e-05	1.19628483564284e-05	1.34299124446631e-05	1.41644890293342e-05
pos_1917	0.000119273773592025	9.364225030884e-05	9.52876515081652e-05	0.000106436028235151	0.000129007367765583	0.000119197334859798	0.000199888085784674	0.000153731121093064	9.38370821228119e-05	0.000150717419275161	0.000154289162044842	0.000145279763124455
pos_1918	0	0	0	2.7083449092956e-06	0	0	0	1.09973198402141e-06	0	0	0	1.27985486626865e-05
pos_192	3.98174131875597e-05	5.58109192592473e-05	9.30065714280904e-05	7.52896012683023e-05	4.83477493303108e-05	6.30000878513963e-05	4.41148936112086e-05	7.00310179265976e-05	4.58701072525676e-05	4.5495419060149e-05	6.46040828687306e-05	0.00010850939742781
pos_1920	9.29124664832951e-06	7.25071159165278e-06	3.89768601548959e-05	4.64903492065118e-07	7.80167264004255e-07	1.01472073225573e-05	3.2508651414416e-06	1.90683853140584e-05	2.96722507653615e-06	9.30341767442417e-06	1.4096640039322e-05	4.49713096392043e-05
pos_1921	4.09051787153936e-06	1.32392366628679e-05	1.18383802405526e-06	4.07154536565783e-06	3.00846012199697e-06	3.95833422563687e-06	1.0347153838228e-05	6.65270777730367e-06	1.73984663795045e-06	1.10337989166651e-05	5.61152918230637e-06	1.60894566889954e-06
pos_1922	2.7943239101155e-05	3.41248874677211e-05	1.37472530848427e-05	2.1184922695033e-05	3.044901909106e-05	2.26181013898501e-05	1.9717604934982e-05	1.76174340760125e-05	2.13505545281667e-05	1.69836496717694e-05	1.90550168837915e-05	1.91626392904881e-05
pos_1923	0.00212536859683121	0.00116645787902525	0.000968259729594823	0.000934181234403141	0.00144812385075895	0.00144344141221121	0.00154681656773176	0.00126921572116091	0.00121920998418896	0.00123052739807571	0.00134437672978144	0.00129292138800214
pos_1924	5.13875207692201e-05	5.85552593990586e-05	5.87293982983448e-05	7.29550844498793e-05	4.91699857006227e-05	5.17713488715683e-05	5.52870448067867e-05	5.27970889907015e-05	5.44229518495115e-05	5.9608384860465e-05	6.26485309374183e-05	5.23028827488291e-05
pos_1926	0.000540373907298384	0.000780711279997142	0.00105334643483915	0.00073768780637041	0.000835390688619478	0.000871048928010462	0.000615272000318006	0.000701361812082495	0.000871981633588756	0.000721713475649827	0.000707448615937722	0.000991463382810812
pos_1927	0.00824769522277654	0.00645656766729617	0.0108089688380562	0.00679009668278375	0.0110423999920611	0.00795290404372468	0.00515252143144847	0.00599918616472132	0.00528452113251467	0.00728689010436488	0.00576137187116136	0.00682219592238915
pos_1928	0.000308801079713891	0.000378208678944288	0.000357816457316942	0.000825652318184179	0.000336631631052369	0.000451986744667861	0.000514053959532839	0.000357171642100264	0.000551175809995332	0.000424883737032964	0.000442817137322634	0.000453819368171485
pos_1929	0.000172507209194963	0.000214119237067817	0.000202156538397303	0.000181759540923747	0.000154817763892128	0.000182950210425409	0.000162588470786407	0.000184463473241919	0.000195964665191149	0.000195125136054076	0.000187999758533603	0.000180017181619562
pos_193	8.03485514577717e-06	1.33983148908262e-05	1.34943478521546e-05	1.31324870418638e-05	1.0815575729779e-05	1.08122022204921e-05	1.12038074992114e-05	1.2773401643972e-05	1.17949907510007e-05	1.04725804766796e-05	9.66421070090681e-06	1.09628587007271e-05
pos_1930	4.01633414125464e-05	3.12678243343938e-06	4.19974866261451e-06	2.01525228250082e-06	2.12428215620013e-05	1.78154063012919e-05	1.25956621556011e-05	7.53640500279863e-06	4.83997474639403e-06	6.36516774957489e-06	6.49931458935444e-06	2.67194512717079e-06
pos_1931	1.48821082908495e-05	1.29746975472143e-05	3.39741508096164e-05	3.14832122391749e-05	2.52865083682045e-06	6.67815458858633e-06	1.84383797048345e-05	1.27174527514353e-05	4.49696036733975e-06	3.13056578795409e-06	4.44765589026226e-06	3.3214979698296e-06
pos_1934	0.000221950349615676	0.000306435749234891	0.000298669164519401	0.000329000545403334	0.000180334369153527	0.000209980530803575	0.00017645741929698	0.000253943246111637	0.000215937837632288	0.000198213559792141	0.000209708738198085	0.000237401091790106
pos_1936	0.00051432578939224	0.000702397700926801	0.000410895667784308	0.000497314982864111	0.000685637358845924	0.000598151322234691	0.000499023381679631	0.000525105722562929	0.000801327850053749	0.000745190517734713	0.00065841689215097	0.000525821073342249
pos_1937	5.07451722535593e-06	4.85281029151619e-06	7.05560328798261e-06	5.82491277172949e-06	6.05168970024091e-06	7.15987453934819e-06	4.16737481898311e-06	5.5752248801832e-06	6.75928871413763e-06	3.66666313649895e-06	5.98466024975989e-06	4.92248984874438e-06
pos_194	2.85243731828288e-05	1.89089468573599e-05	0.000108639168909307	1.2080725749077e-05	1.17827857711677e-05	3.28361214331345e-05	7.78635798089974e-06	3.78758821383126e-05	6.57066834671759e-06	6.17469624723199e-05	4.51957639139785e-05	9.61672779542794e-05
pos_1940	3.22279300983568e-05	3.47172011439958e-05	7.03356367145444e-05	8.92884688866555e-05	2.90703905643892e-05	4.58166253492989e-05	2.9036415165411e-05	4.48077774516632e-05	4.88703153085361e-05	3.1844438350767e-05	4.4334495571632e-05	6.86740609244335e-05
pos_1941	1.42391152401105e-05	8.80010145045111e-06	7.01832171255975e-06	7.68302404830194e-06	1.2049344381399e-05	9.48644958076488e-06	1.08916283761377e-05	8.94509246762977e-06	9.53807129229539e-06	8.7479477805328e-06	9.20903278077072e-06	1.04933979728445e-05
pos_1943	3.18000425263636e-05	3.79238844326184e-05	1.62867970747932e-05	1.02172091244492e-05	1.08241338668666e-05	1.23490084823195e-05	1.41344025579401e-05	1.58184242404423e-05	1.34172487593235e-05	1.21838798149784e-05	1.1366498958756e-05	1.83659643088841e-05
pos_1944	1.37295998850329e-05	8.88995552939456e-06	1.7106977437975e-06	6.90560160122048e-06	9.68033933449528e-06	8.11037418995656e-06	8.54983568588769e-06	7.67029205983283e-06	7.23572597756248e-06	8.84322122677202e-06	9.68254225566155e-06	1.11108762874544e-05
pos_1946	1.33689523227887e-05	1.54459421138921e-05	1.98432481374343e-05	1.17413345207605e-05	2.02783079555416e-05	1.17622085743386e-05	3.62524236384399e-05	1.82268898658428e-05	1.13281165965038e-05	2.362755812304e-05	2.02753610346067e-05	1.85517439686118e-05
pos_1947	2.41497568145594e-05	1.70131795978375e-05	1.88189811482142e-05	0.000218007054595087	0.000332979476930998	2.06721150141573e-05	1.36084254379078e-05	5.52287112111273e-05	0.000248994536486595	5.86825180590602e-05	1.59791044265863e-05	1.84184459170915e-05
pos_1949	0	8.97364696760771e-08	2.77529189722473e-05	1.96719930579031e-05	3.26629683610684e-06	8.14610724505924e-06	1.03229196633667e-05	2.64398569936636e-05	2.20803628177473e-09	1.26198644707979e-05	1.1280813800308e-05	1.0010410570775e-05
pos_195	4.89671071181358e-05	0.000108878453967328	9.0170640961469e-05	6.83106216193696e-05	6.17377871256416e-05	6.68315939332568e-05	6.16979989755248e-05	0.000113942311801838	7.76578505192973e-05	6.25960347649567e-05	7.20834316047353e-05	7.42455107914801e-05
pos_1950	1.34391661076663e-06	1.87164990928872e-06	7.91287438017276e-06	2.11182366064583e-06	2.57169297800504e-06	2.95401876770764e-06	7.16990381440334e-07	2.27029618541872e-06	2.25328890778704e-06	1.61718482675643e-06	2.0862869668866e-06	2.33643442665576e-06
pos_1952	0.000139572638926339	1.8568234338175e-05	2.82907047304351e-05	1.18962902095494e-05	6.68194710878924e-05	5.90429535002912e-05	5.29615481034754e-05	4.07839377315685e-05	3.08347111556299e-05	3.61952837833301e-05	3.64836325056442e-05	3.38777470906418e-05
pos_1953	0.000326292128761341	6.53499891525992e-05	7.08791096731433e-05	5.89170405246448e-05	0.000181763338278337	0.000169994069194221	0.000158149570939544	0.000132644296507808	9.45477203652707e-05	0.000115040750995332	0.00012522003591469	0.000113468358878611
pos_1955	2.4966517693735e-05	2.68406521361577e-05	1.90285232426181e-05	2.67973110607934e-05	3.50483841346585e-05	2.37565008721312e-05	3.93610556582615e-05	2.79297418875909e-05	4.00034411734337e-05	2.65497178214066e-05	3.12066565417249e-05	3.07082338711168e-05
pos_1956	9.94317950489739e-06	3.45069808580186e-06	1.58461474081699e-06	3.57868071196798e-06	9.48616971071794e-07	1.90760907589158e-06	5.7154499612554e-07	2.26461126052198e-06	1.30831027332239e-06	1.18900590962605e-06	0	0
pos_1957	5.76712492941287e-05	4.60321601165649e-05	8.4632016870739e-05	0.000140591534988268	5.54821051741818e-05	4.71609317332337e-05	4.14640829783984e-05	6.00256081333341e-05	6.34252852615175e-05	7.38138569884517e-05	8.72556155800473e-05	6.88655382653114e-05
pos_1958	4.68692683815884e-05	4.89340990191025e-05	4.74478834890435e-05	3.99327338688535e-05	3.89990633381878e-05	3.99208459308388e-05	3.8669204603036e-05	3.60973057358352e-05	4.18931632688941e-05	4.01876870897351e-05	3.9535056514044e-05	4.04358220637326e-05
pos_1959	1.31844467005389e-05	1.44579466792835e-05	1.84318072607794e-05	1.45084760990583e-05	1.31469509562629e-05	1.67515603129401e-05	1.30786150468309e-05	1.77617498506769e-05	1.43584974131885e-05	2.08177657397047e-05	1.87866978775031e-05	1.70342675931505e-05
pos_196	0.00024999995365682	0.000309201081500457	0.000269513666815374	0.000318222996063203	0.000256412801942215	0.000295561783495157	0.000245657819668826	0.000257623532015817	0.000357741404010935	0.000309015758925985	0.000305374756491085	0.00026606135890497
pos_1960	0.000240120400989028	0.00102639617705921	0.00110199314289853	0.000775431583084256	0.000584796595524747	0.000656951828942373	0.000625971729194094	0.00105429772761441	0.000969903228876971	0.000785374431105196	0.000856199333464628	0.00106663387407993
pos_1961	2.24797596234739e-06	4.36317794658196e-06	3.95043843379779e-06	5.14159294019862e-06	3.99483339731665e-06	4.37050816202117e-06	6.68217700144557e-06	4.51118574250379e-06	4.75525521506014e-06	5.54396655533109e-06	5.20078918992936e-06	3.86148600154103e-06
pos_1963	7.94818670626784e-06	7.92369416589862e-06	5.80110019663289e-05	1.98496899204645e-05	1.40505523995177e-05	0.000100521589164162	2.16883015786834e-05	3.46292581080434e-05	5.50550309631967e-05	7.05353257418116e-05	2.78697592469254e-05	2.10829116876056e-05
pos_1964	5.40435980661928e-05	7.18141798454803e-05	2.57283803551826e-05	6.0684847081642e-05	1.03069524534048e-05	4.03385480581344e-05	4.0381410395248e-05	3.72163471528587e-05	1.35243754433511e-05	0.000107106399005673	4.47486218854613e-05	4.13638901452549e-05
pos_1965	3.1062193514061e-05	6.12582282859952e-09	0	2.95711144139477e-09	0	0	8.81421898296672e-09	0	0	3.85462702654363e-08	0	7.08070511695076e-06
pos_1966	0.000160669960051709	0.000185068270878769	0.00019442508528251	0.000117408571350816	0.00014818366181893	0.000157795514695252	0.000108892362421367	0.000149307247490287	0.000132519085279396	0.0002617111418666	0.000152221629967227	0.000178455227003092
pos_1967	1.11768470231135e-05	7.77732118898564e-06	7.52276755626137e-06	5.65992324056351e-06	1.49665784122258e-05	1.00116494123963e-05	1.51726048254587e-05	1.1110281587688e-05	8.6932976897136e-06	5.35733099320635e-06	1.10618727134586e-05	4.45178079753873e-06
pos_1968	0.000257659521947679	8.16921237193912e-05	7.58465850052795e-05	7.10641626073898e-05	0.000161856603493227	0.000156040385841142	0.00015249999499527	0.000121616682276594	0.000102720491407836	0.000122669887664943	0.000121483675733468	0.000119369448459336
pos_1969	0.000126824722112037	0.000149696187069212	3.76849144891364e-05	0.000113139911411909	6.0765211421867e-05	7.6894578064875e-05	7.60897849360533e-05	5.94386310695596e-05	1.95738042537935e-05	0.000159878335333575	6.2149243606464e-05	2.85428096267157e-05
pos_197	6.02319271523333e-05	0.000267534939037873	5.41108243239207e-05	0.000125685115640383	0.000222860836899508	0.000128858306312428	0.000436197207864248	0.000285716556646832	5.53089183560567e-05	5.93755918863959e-05	0.00022185249680222	7.00584813167757e-05
pos_1970	3.32942300577236e-05	4.21931665669188e-05	1.15938900851151e-05	2.95094124344216e-05	2.45788015508688e-05	2.7236774048994e-05	2.97985594281425e-05	2.205605001993e-05	1.95906487424953e-05	3.10067472819072e-05	2.54089479068459e-05	1.74909345732565e-05
pos_1971	8.34574262599038e-05	0.000121381605283522	6.26243993983978e-05	7.78773434813997e-05	0.000117756700279125	9.19928192602539e-05	8.11788946904684e-05	7.68448315303553e-05	0.000103368762792812	5.66805652449267e-05	8.18576006175576e-05	8.15950979321166e-05
pos_1972	4.59256277644604e-05	0.000243723776536416	0.000102195024711567	3.10818231924051e-05	0.0001181328762495	9.15226523945548e-05	7.95949291338333e-05	7.57462975348782e-05	2.83935323439068e-05	0.0002228049621796	8.71999750985462e-05	6.74488547975612e-05
pos_1973	0.00019423090985256	0.000405423257382851	0.000831139553270019	0.000122468366594471	0.00043766608189136	0.000389303816656001	0.000104493076956339	0.000345185845794915	0.000132716548729562	0.000886390488592457	0.000450961676865976	0.000584904287658363
pos_1975	0	1.78467200938661e-06	5.8289113371244e-06	5.65289879799164e-06	3.43764603952478e-06	2.71012028581748e-06	1.67561601336712e-07	8.33726361260251e-07	1.8418914852112e-06	2.62889591047413e-06	1.25461380345017e-06	2.06577718880294e-07
pos_1977	0.000293741593655451	0.000414597351461274	0.000338250457744441	0.000349949951193085	0.000259571851265347	0.000320762218614795	0.00026512134162911	0.000323475544354347	0.00033353099729771	0.000283625263611721	0.000311371771480149	0.000354848707627092
pos_1978	0.0035722615944212	0.00397942285261598	0.00378482320285296	0.00345341482626284	0.00343088662947887	0.00355424224728841	0.00363698281264001	0.00392826858459731	0.00370156221355206	0.0030327630683213	0.00325214721932	0.00687931778216734
pos_1979	0.000339590887695498	0.000355820393801864	0.000564856998401551	0.000392557414688674	0.000410412904265629	0.000388971901837306	0.000337047227429983	0.000355241508389342	0.00053811796505235	0.000342271655276803	0.000372474823672456	0.000364148380225852
pos_198	0.000234972751636768	0.000218988954192471	8.92606256495759e-05	0.000298225711916072	0.000190560949563502	0.000209840471825749	0.000309358236378692	0.000223311914308416	0.00013342972807266	0.000580563280131757	0.000277067428701396	0.000147232936458473
pos_1980	3.54846446758948e-05	3.68479666342847e-05	3.92381557037019e-05	3.84886188988517e-05	2.95416872968544e-05	3.12242674707439e-05	2.86635296718168e-05	3.42020513823562e-05	3.32186447199945e-05	2.93267454880865e-05	3.27895819802912e-05	3.63616225457437e-05
pos_1981	4.58746306146212e-05	5.38257729815847e-05	5.81808382274859e-05	5.67027677966866e-05	4.37801097682763e-05	5.17208374215431e-05	5.0509980159021e-05	5.35642257376413e-05	5.21519349749362e-05	4.80138247789009e-05	5.43139061237886e-05	5.48546619694256e-05
pos_1982	8.28317349717533e-05	6.73308691190149e-05	5.73595863972568e-05	6.77323968423533e-05	7.07617929876374e-05	6.81607603479972e-05	7.11671472991338e-05	6.84265529873736e-05	7.15918627957332e-05	6.73663053307542e-05	6.45210381763395e-05	6.75669987318749e-05
pos_1983	1.77460712299299e-05	1.74285249320361e-05	1.53333725858858e-05	1.50329557652063e-05	1.11723136870947e-05	2.09860736728627e-05	1.86146284266752e-05	2.35247667403183e-05	1.67971737510355e-05	1.16381397186572e-05	1.56166361957998e-05	1.84484466283848e-05
pos_1984	0.000371604868550072	0.000420070603368443	0.00032617398284123	0.000388138575175155	0.00144050857494063	0.000404395127362369	0.00302141091367934	0.00186313222228631	0.000439595848441088	0.00172895775378487	0.000753720471452505	0.00101557933062582
pos_1985	7.8318006045478e-05	0.000132155833367526	5.0456803707516e-05	9.51244207130928e-05	9.3130641978998e-05	8.70548615049354e-05	8.46771954721927e-05	7.4028367157881e-05	0.000131305028979744	8.5063793798152e-05	9.26976213103232e-05	6.91344597338598e-05
pos_1986	8.04756303356965e-05	0.000121423669393084	4.78793490034611e-05	8.56400783427822e-05	8.01272266657229e-05	7.96035404539519e-05	0.000180304233377729	0.000110579681340398	6.646108857507e-05	7.72594029715695e-05	0.000104928036588063	6.3977195612451e-05
pos_1988	0.000435891480581534	0.000497994266319559	0.00102301510896417	0.000769517853443241	0.000517216481944949	0.00064391476790191	0.000595781764411558	0.000819488268436621	0.000555897583957409	0.000632145583562107	0.000738353292485177	0.0012039922531715
pos_1989	8.51892870362725e-06	1.75656808251116e-05	1.40096490556335e-05	1.16342709206156e-05	8.06578869760758e-06	1.08513883407423e-05	9.60465554106687e-06	1.32570797906345e-05	1.49842192232464e-05	8.80808568036865e-06	1.03354396262317e-05	1.08760718713834e-05
pos_199	0.000355232325585467	0.000403701404186682	0.000384836903878457	0.000386449156010971	0.000336769059934051	0.00036433881786338	0.000393975453489075	0.000379045753613406	0.000338669906120263	0.000414224279858156	0.000370888022775937	0.000362078002878098
pos_1990	0.000471293469783493	0.000596924798247757	0.000443525286735043	0.000568579926339429	0.00045271999423763	0.000499475897397354	0.000583950593397757	0.000508797558287925	0.000498462122550359	0.000483933733842879	0.000501954198725392	0.000456057390880926
pos_1992	6.88666101877418e-05	7.81077118535546e-05	7.30698004919111e-05	0.000216287428586647	9.93663553477767e-05	0.000120240054605747	0.000220001074373392	0.000143349732664436	6.3741362320515e-05	8.33969845276074e-05	0.000118398396020083	6.65331936416426e-05
pos_1993	0.00171089183137644	0.00190735868538432	0.00223181772692591	0.00146364134061935	0.0010194696577724	0.00104586078922201	0.00114246102062286	0.00118475303260891	0.00155718870508103	0.00103368150746819	0.00109812674191054	0.00108759832508539
pos_1997	4.86050602222576e-05	5.04396257230263e-05	4.02568682748194e-05	7.84973357639485e-05	0.00019413443336799	9.14652657538567e-05	4.46782749267985e-05	8.94580658769003e-05	8.37020978703936e-05	3.08340877604999e-05	7.20162425448855e-05	0.000161204994793004
pos_1998	0.000147032126055515	6.8438251906686e-05	1.80217001211618e-05	6.0845689386799e-05	6.31460518140218e-05	7.39665928458984e-05	0.00016216767190321	8.77953524493747e-05	3.66398572149115e-05	4.35000032971882e-05	7.70690178998009e-05	8.46022406734766e-06
pos_1999	1.13302883446215e-06	9.72647091982189e-07	1.52436126276636e-06	1.07369833522837e-06	1.01179920859605e-06	1.19858386841974e-06	1.16409051919916e-05	6.1038881716978e-06	1.83344726643403e-05	7.48235544717182e-06	1.13950472584905e-05	1.48854435387125e-06
pos_2	0.000170517427450722	0.000115928081646225	9.53278014037365e-05	0.000112962988959792	5.64667956690802e-05	0.000101066774704444	7.10969080891213e-05	8.02729325549578e-05	0.000113535904143407	9.45290568703257e-05	7.54080686988058e-05	0.00123212144890043
pos_20	4.71468057745086e-05	4.14959096363205e-05	3.66888700120988e-05	3.43492284790783e-05	3.24155842812871e-05	3.60235708304138e-05	3.96612497992118e-05	3.79862932494564e-05	3.62471932942054e-05	3.71638593499063e-05	3.62384394427455e-05	3.48306273791625e-05
pos_200	2.19687459989903e-05	3.35944518638194e-05	3.06169672388928e-05	3.13219285862832e-05	2.60075412506689e-05	2.53545043479808e-05	2.64404894723304e-05	2.71950812241594e-05	2.38984070326303e-05	3.26239773902518e-05	2.80217705015906e-05	2.47930123657414e-05
pos_2000	0.000112389497782664	1.85287041681391e-05	1.80554080601689e-05	1.25182295956814e-05	5.51973963160254e-05	5.65383778391407e-05	5.17666066482598e-05	3.98285543821531e-05	2.67854000629036e-05	4.11537765768377e-05	3.94288700139346e-05	3.29461295460752e-05
pos_2002	5.88572914300251e-06	9.65345511845164e-06	1.09602632131702e-05	1.13553874850521e-05	8.05100724805003e-06	9.07859734660202e-06	7.53429267546e-06	7.98727112068427e-06	1.77139027880198e-05	6.8626307898701e-06	9.16514912779274e-06	1.07381192026993e-05
pos_2003	0.00016296959752918	0.000197966695966826	6.38066769727913e-05	0.000166247605698433	4.25740364695007e-05	9.79329505330122e-05	0.000132011690143417	9.68630625368897e-05	4.15481026276397e-05	0.000157395315943567	0.000108707011952373	7.67870190653931e-05
pos_2004	9.80379925761199e-05	0.000118843400392729	0.000150213975642815	0.000134967961525862	0.000103535615260466	0.000121173161142331	0.000106242375795874	0.000120828178476967	0.000117667371176968	0.000104795933190213	0.000118757765815883	0.000126347780384516
pos_2005	1.79853261467024e-05	1.14687065442155e-05	8.17478712370294e-06	1.00651544091942e-05	1.4137620136732e-05	1.31808802911245e-05	1.51476636743508e-05	1.37671747202085e-05	1.29921611359838e-05	1.43370856273795e-05	1.50936375292323e-05	2.60932095153272e-05
pos_2006	8.46669495162335e-05	2.03539328809116e-05	2.22558135998886e-05	1.68251107283127e-05	4.49554937462443e-05	4.16105254758126e-05	4.16846387029298e-05	3.76275325622231e-05	2.80395581913384e-05	3.07483149747966e-05	3.24375980914811e-05	3.43797445287112e-05
pos_2008	0.000268919041750782	0.000346831490100556	0.000319336939743101	0.000286261257683609	0.000243608564894768	0.000278905188408369	0.00025254395632783	0.000292779495437226	0.000306247353299408	0.000261797853068017	0.0002828782799185	0.000269821758340766
pos_201	5.55786135383457e-06	5.56498550382963e-06	4.73890504647133e-06	5.60749175685157e-06	4.21040617404656e-06	4.60606343365737e-06	5.5515098029004e-06	4.76642881527884e-06	5.96854999336179e-06	5.57901801329865e-06	5.31019160285895e-06	5.26758654784921e-06
pos_2010	0.000541679199317333	0.000419247097605632	0.000394047911983409	0.000374539498351348	0.000389418728579676	0.000442149189368709	0.000426918180553118	0.000437036925292565	0.00043489688946689	0.000401290860921256	0.000417697040167076	0.000379841644375872
pos_2012	2.18348369015636e-05	2.82914752242825e-05	1.79124528812386e-05	2.34191801044172e-05	2.03155648183486e-05	2.02719414407742e-05	2.0653049765368e-05	2.11599750297218e-05	2.16854831851587e-05	2.6620823992214e-05	2.08802171405152e-05	1.90452430998723e-05
pos_2013	6.39035119168284e-06	8.59872409278215e-06	2.37412745311231e-06	5.07760892825094e-06	7.89658507084284e-06	4.05022831301072e-06	5.24190002347173e-06	4.45101994501532e-06	3.5773767035611e-06	7.64478323793688e-06	4.82034591219458e-06	7.23756866527483e-06
pos_2014	0.000291849199717918	0.000258606955271391	0.000208693507549904	0.000198577542381496	0.00020620533789976	0.000203176221427571	0.000215188356570343	0.000220772644292325	0.000228531541133736	0.000178022921120138	0.000231244033845576	0.000232183916633334
pos_2015	4.91114730283706e-05	4.51452982066404e-05	1.07737639352737e-05	2.12117225549859e-05	2.23797182025225e-05	1.99284074900758e-05	1.66521540991801e-05	1.43832034891102e-05	1.29443929521663e-05	2.66464403160112e-05	1.75032727591434e-05	1.30092137015368e-05
pos_2019	8.76744024115203e-06	5.36741983093276e-06	7.25769745671347e-06	9.0493885152399e-06	1.05179977265898e-05	9.11435368314526e-06	1.00342081385612e-05	9.55907762750476e-06	1.2820533706625e-05	9.75873066673732e-06	7.90186982379496e-06	9.50705849626112e-06
pos_202	0.00265326099739824	0.00167297401494058	0.00162502085943215	0.00139781050747059	0.00162748348332676	0.00170472176115386	0.00172208101775902	0.00164520087900293	0.0017162752350363	0.00155223564530884	0.00164279425997184	0.0016050780202879
pos_2020	8.99333631175617e-06	1.09469117885121e-05	7.40050568303012e-06	9.13135949171549e-06	8.20711397229372e-06	9.72511776529945e-06	9.90451338869441e-06	1.33888440936179e-05	1.17018850832509e-05	9.19242371986833e-06	1.30220260206242e-05	1.94169826510094e-05
pos_2021	4.34161190928075e-05	5.47181895588226e-05	5.24246361755126e-05	4.92968916089671e-05	4.17671433625581e-05	4.61132558849868e-05	4.64228354463699e-05	4.95304231647015e-05	5.08218911186655e-05	4.71005948224416e-05	4.73706649936638e-05	4.77262430302415e-05
pos_2022	0.00180442444007625	0.00202951134712369	0.00294549268407945	0.00254259358724995	0.00184897112778053	0.00201534437896279	0.00179338758468162	0.00232289301253754	0.00250408681843243	0.0017919382779541	0.00216477105456873	0.00201741939016416
pos_2023	3.61201114078646e-05	5.29181884175766e-05	4.52373587616484e-05	4.66979306389947e-05	4.40582716428176e-05	5.06316084517153e-05	4.21237712110783e-05	4.73606702716469e-05	5.8758320761467e-05	4.94212275309775e-05	5.1148084112559e-05	4.17570489451419e-05
pos_2025	1.12427478181628e-05	1.37123984691986e-05	2.50639890330059e-05	8.78672976298007e-06	1.1034877348056e-05	1.01415950170239e-05	2.72989025993846e-05	3.21154285119862e-05	6.7879092587032e-06	2.78406424707356e-05	2.23259017457921e-05	2.73293814279885e-05
pos_2026	9.89998908517696e-05	0.00011016438619717	0.000105588484289235	0.000123421048849353	9.05129315340311e-05	0.000104730769771689	0.000103437939326113	0.000110064472427242	0.000115205408501083	0.000114818638980737	0.00011450129384121	0.000100771868256316
pos_2027	7.35298566895993e-06	6.17683724826478e-06	1.16113123400317e-05	7.98635256699231e-06	9.57506131970197e-06	7.8984520057108e-06	1.62495361449432e-05	1.47308210407475e-05	7.86520135364678e-06	1.50682523960723e-05	1.24238178014197e-05	1.38339070780034e-05
pos_2028	7.698929085696e-05	4.78856893434318e-05	5.37889452665826e-05	5.21192178731915e-05	6.28384158689512e-05	5.90986862356818e-05	5.83327114803625e-05	5.44330468445111e-05	6.02326075396744e-05	5.52039263449388e-05	5.58173815124941e-05	5.71272349803784e-05
pos_2029	3.57674774499296e-05	3.69463926262844e-05	4.23249578612458e-05	4.20222368099731e-05	4.8177448648331e-05	4.00560604558832e-05	4.22637121298011e-05	3.99616016054126e-05	4.51737575494488e-05	3.87318510857388e-05	3.864597367964e-05	6.38358358941228e-05
pos_203	0.000132741818793857	6.37044631350504e-05	7.66613641801237e-05	6.00222196820476e-05	4.92931656244339e-05	5.62503496940162e-05	0.000335233952144765	9.543427127498e-05	3.72743621910761e-05	0.000177193460466096	8.00136734769641e-05	6.94707569540564e-05
pos_2030	3.6940464268118e-06	7.7612101979924e-07	0	0	5.09355002547179e-07	1.30228077721326e-06	1.77876742797446e-06	4.75740746386008e-07	4.58614839007376e-07	7.83640937953249e-07	1.16349348193964e-06	0
pos_2031	0.000106264346943104	0.0001174824554002	4.26689760013213e-05	7.95102189955814e-05	8.05772522721403e-05	7.21241797374659e-05	6.30273799492246e-05	5.94163228738673e-05	6.57244928500783e-05	7.35889184662508e-05	6.80924138130068e-05	6.49889283316225e-05
pos_2033	0.000115847403424353	0.000109134600868127	0.000108157959118135	0.000132144571874321	0.000108149654755634	0.000145234072025505	0.000137820300895932	0.000770174024692494	0.000142133580775192	0.000148876776852135	0.000540544518413469	0.00185391566433255
pos_2034	4.31225122261622e-06	1.55171403404236e-05	5.51083825140688e-06	7.82334412033692e-06	1.0079573571492e-05	8.55234946141712e-06	9.07042255037923e-06	1.2713715165873e-05	1.45872558571549e-05	7.03542977463081e-06	8.84885354383058e-06	5.81923037401051e-06
pos_2035	1.39338403828139e-05	1.16257048335995e-05	2.93460977075323e-06	1.03939206542284e-06	2.22061280909913e-06	6.77159008342976e-06	2.17652067792621e-06	2.4675717370515e-06	4.13735732748053e-06	0	3.75881808475347e-06	2.11117291610482e-06
pos_2037	5.1331392180072e-05	3.81300684663967e-05	2.977730896402e-05	3.35889575958354e-05	3.92618508627554e-05	3.35354411226268e-05	4.24435571669917e-05	3.97751377256882e-05	3.90837182053049e-05	3.61412618504793e-05	3.84439154480777e-05	3.15130229747966e-05
pos_2039	7.97340477300967e-05	0.000105453126584152	9.39269409072598e-05	9.02661519314715e-05	7.55574524602759e-05	9.05623837297313e-05	8.23548200761938e-05	8.98624630405508e-05	9.71878006570678e-05	8.56880187939669e-05	9.09025786391684e-05	8.48638134631604e-05
pos_204	4.88814027300275e-06	7.17106581873897e-06	8.4711544086286e-06	7.07246075240107e-06	4.45379549079146e-06	6.11216363504351e-06	7.1532629548838e-06	5.44862422169655e-06	9.26397334352415e-06	5.17058994298267e-06	7.41286944549562e-06	5.47208978366004e-06
pos_2040	9.54403357247265e-06	1.49673645712833e-05	3.10455568448245e-05	5.49354276204325e-05	3.16793924945222e-05	3.11173835675199e-05	2.6993613469308e-05	2.30355267352557e-05	1.99424056740351e-05	1.10993758036279e-05	2.23808422355799e-05	2.31141045076237e-05
pos_2041	1.29182487928578e-05	1.38808377014861e-05	2.6384561332712e-05	3.16890253184461e-05	7.46342933079883e-05	3.5589339080957e-05	3.61940691368961e-05	2.11100783508666e-05	4.71276176685522e-05	2.27073952772262e-05	3.62034433603319e-05	2.99300964234898e-05
pos_2042	0.000161432469347719	2.83157723003242e-05	3.29244999085706e-05	1.68679118945556e-05	8.89290756526726e-05	8.88733330769181e-05	7.18389798997861e-05	6.63508864297722e-05	4.55474487445532e-05	4.84126659042938e-05	5.76153162720302e-05	5.02162290904049e-05
pos_2043	2.94677797916273e-05	5.4877275974653e-05	3.83883664658722e-05	3.41930636400911e-05	4.41965750510115e-05	3.805477354984e-05	4.57199732479837e-05	3.74109398154354e-05	5.47895594911465e-05	4.44055095586418e-05	4.14181378569132e-05	3.66550929509356e-05
pos_2044	7.91655807417034e-05	0.00010392777132189	6.55287656327855e-05	7.47988306432603e-05	7.7533173740744e-05	7.54067643924254e-05	8.46012813729238e-05	7.9237581430478e-05	7.82537555941882e-05	8.64769365507294e-05	7.83322389250605e-05	6.60244893239553e-05
pos_2047	0.000225198300232017	0.000380010157814781	0.000186605097658689	0.000333480473537675	0.000190990667829687	0.000269625943243767	0.0003506063931035	0.000271781361093582	0.00025230368686927	0.000337664803880301	0.000288689126997984	0.000202463229688723
pos_2048	0.000397284408812373	0.000296974801030976	0.000281220794344958	0.000242889971500627	0.00026320846443042	0.000287068102260913	0.000276731456151558	0.000270188173243888	0.000294305713653249	0.000262252103396705	0.000275627565678736	0.000269548637580357
pos_2049	2.11885140027162e-05	2.6316182217529e-05	2.40657983440365e-05	2.13692980130486e-05	1.95090096056671e-05	2.13411198498165e-05	1.98899478616326e-05	2.06595358425979e-05	2.2599837319483e-05	2.05256314416993e-05	2.16247231698364e-05	1.80628286336075e-05
pos_205	4.07838549573931e-05	5.70995766343621e-05	5.66509463763112e-05	4.62428754430512e-05	3.67423233085705e-05	4.93020260342162e-05	4.35541617594663e-05	4.71383690722155e-05	5.49489441965588e-05	4.9807740027999e-05	4.71872041474355e-05	4.43948190904659e-05
pos_2050	0.00013853307940882	0.000150231997529532	0.000130281533804126	0.000123388847661244	0.000126467407050402	0.000131657617794124	0.000141074219523407	0.000128283655644584	0.000138996657010707	0.000112635445469937	0.000127558234431521	0.00014307385325329
pos_2051	2.38691887353645e-05	2.06580872097786e-05	4.90487397365785e-05	3.89824613644036e-05	5.18249869378908e-05	3.59406201721373e-05	2.07415003392262e-05	2.44672763091278e-05	4.09940378557116e-05	3.88581736681065e-05	2.74743057131991e-05	3.09371385440592e-05
pos_2053	0.000125842763776815	0.000155102975094845	5.14018426090346e-05	0.00017044076830477	1.98461173354039e-05	8.68629394892293e-05	8.71065998056687e-05	9.77809377215222e-05	0.000136589936603857	7.48678000862394e-05	8.58010851066642e-05	8.68391294533354e-05
pos_2054	1.58872511838223e-05	2.01356268784028e-05	1.665095543616e-05	2.07718951407053e-05	2.84304592780695e-05	2.07800476683805e-05	1.17407275173918e-05	1.52667110676966e-05	3.04043409679179e-05	2.05800080212985e-05	2.03895967291763e-05	2.00676222330586e-05
pos_2056	7.80424336271419e-06	1.27954428919737e-05	1.13939545382865e-05	7.27798909392904e-06	1.31584179373823e-05	1.14045037706128e-05	2.17823262436596e-05	1.70851811660206e-05	7.35375337549712e-06	1.93449557797614e-05	1.25477724553615e-05	9.44095071385321e-06
pos_2057	2.87823582460224e-05	3.57418213349484e-05	3.27700821866356e-05	2.45607539677717e-05	3.27381035799066e-05	3.92927062334747e-05	4.82122720394676e-05	4.09024054913717e-05	3.3445086941365e-05	4.81189069811282e-05	3.85696711271216e-05	4.33176542479318e-05
pos_2058	6.13502762755767e-06	1.03698644343842e-05	3.17663002212186e-05	0.000130369988439492	9.14467314717261e-06	2.38548410473443e-05	1.33027578644254e-05	3.45302126524545e-05	7.63195306970928e-06	9.32683117702339e-06	2.65200116448379e-05	7.54004411512696e-05
pos_2059	2.57731068987857e-06	2.78524265284487e-06	5.57386351726445e-06	7.40160479470214e-06	1.184641902091e-05	6.57417410211257e-06	1.08334980446796e-05	8.21332425476394e-06	1.21545553951168e-05	1.05626765291654e-05	8.18403126048027e-06	7.70166333558292e-06
pos_206	1.53088089763209e-05	2.01126442539715e-05	1.50146598248848e-05	1.63681765660949e-05	1.36808780465253e-05	1.52505063843722e-05	1.12513461049729e-05	1.20401288106539e-05	1.93360793035363e-05	1.88845605139785e-05	1.75571017164282e-05	1.60843948423782e-05
pos_2060	2.31046116842942e-05	2.34172863153003e-05	3.50024732611579e-05	3.82879662435131e-05	1.56993869886535e-05	2.82058371206543e-05	2.04455453939754e-05	4.6333181031366e-05	1.82419782491323e-05	3.29442041948352e-05	3.89286479147797e-05	8.90331402991113e-05
pos_2061	8.52101709964942e-06	3.52903190961401e-06	3.12989876730909e-06	3.29390806955415e-06	5.36459213527061e-06	4.8954842773328e-06	5.64731299943768e-06	4.73981471466243e-06	5.53063112375708e-06	4.71678283760405e-06	5.53637905439581e-06	1.86938462891261e-05
pos_2062	0.000208914445129823	0.00027999254941845	0.000165443873395752	0.000244129116077516	0.000213486698475702	0.000176222433730455	0.000217109893490721	0.000220684064722754	0.000190230182390784	0.000215364169917975	0.000228374380954502	0.000233266120782616
pos_2063	9.04293940608713e-05	4.76778048249175e-05	2.72716744445753e-05	3.20372044479293e-05	5.99936587291881e-05	4.40402583685099e-05	5.27885872311615e-05	4.22735872962839e-05	3.92975816984424e-05	3.34282779351259e-05	4.24820106509573e-05	5.16764361328121e-05
pos_2064	0.000325094645068699	8.14575655902955e-05	9.69086872261136e-05	7.46677792180597e-05	0.000197548612218349	0.000196019096096523	0.000175631668759791	0.000155213661390904	0.000118957174382697	0.000127895482627963	0.000155769134943931	0.000133420552778767
pos_2066	0.00012882635240798	0.000176840017930738	0.000155522921664014	0.00016003549884384	0.000139377907118753	0.000127823178434266	0.000121778131155248	0.000150627288778806	0.000144057215842846	0.000121333004892504	0.000151913835693398	0.000148540967587957
pos_2067	0.000195328718777127	5.57815675812421e-05	5.04892528297315e-05	4.74648604578498e-05	0.000103717032218637	9.81734480328727e-05	0.000101516604298326	7.91997180205692e-05	6.5648624809543e-05	7.77572423184727e-05	7.63949364082635e-05	7.52522699589423e-05
pos_2068	0.000570297122305866	0.000661662291972231	0.000481249261239871	0.00065023434113348	0.000503641109316395	0.000599192586625934	0.000623443684981751	0.00058921710024394	0.000686030739827609	0.000611786087812385	0.000574216412993489	0.000553065760994178
pos_2069	9.48058033049042e-05	0.000122722307554705	0.000127762898675956	9.9428781695928e-05	9.01023178153144e-05	0.000102679409568202	8.21501751593334e-05	0.000101365657349552	0.000106726019272076	0.000114477017098436	0.000102206356111345	0.000109803845301653
pos_207	0.000674884042701057	0.000279154783470925	7.79580758511863e-05	0.00033998953725746	2.81365189586508e-05	0.000263932387195746	4.95682308267777e-05	6.50177745536865e-05	0.000133626296305598	0.000872912803806677	0.000223510726771953	0.000100543130898994
pos_2072	0.000134245745661704	7.60561974607633e-05	6.6133508659902e-05	6.18404364509905e-05	6.97901332218781e-05	8.1865584220027e-05	8.44759326122005e-05	7.85891970573894e-05	7.47131148330781e-05	7.13422152434155e-05	7.54112213630034e-05	7.40018224549368e-05
pos_2073	0.000133156917835779	3.4148078698522e-05	3.68929876400151e-05	2.57640380346644e-05	8.10178868922871e-05	7.54680988695566e-05	7.81119724274646e-05	5.96706539902742e-05	4.21353730301057e-05	5.35881518392386e-05	5.5908031227056e-05	5.88412550178107e-05
pos_2074	0.00447839821329078	0.00176025735604895	0.00160858386620262	0.00146257785167283	0.00294091895242368	0.00299476157360884	0.00314949314071176	0.00238274884919241	0.00220014767724385	0.00234971772265052	0.00243316827907929	0.00244179416773595
pos_2076	0.000121020183792292	0.000223226511187943	6.10482937977259e-05	0.000138958722037064	0.000149085239837694	0.000132709981002531	8.51003017696947e-05	7.77104343663455e-05	0.000216950463972787	0.000119402893073898	0.0001213126448898	8.00885619959643e-05
pos_2077	5.87946890280925e-05	9.08422613027284e-05	5.97117916237096e-05	5.55776267880626e-05	7.07031815010233e-05	6.31540066553434e-05	5.83917959135645e-05	5.66227096973636e-05	6.31387169016645e-05	6.5778995355934e-05	6.13187106790071e-05	7.43147113191972e-05
pos_208	1.82555845445908e-05	3.14026448937401e-05	1.27165316040064e-05	5.18372667026291e-05	2.90784323451311e-06	1.96655040199851e-05	5.82154544414988e-05	3.74410814806621e-05	3.42303438986385e-06	9.01848962553237e-05	4.3180108291155e-05	1.00197728028241e-05
pos_2080	1.16137254644214e-05	8.24498421020697e-06	1.17938967478694e-05	8.05374208524591e-06	1.40077661918889e-05	1.51361173698308e-05	1.09240717481718e-05	1.63138415912139e-05	1.3576206544193e-05	1.26543065678758e-05	1.09953646552576e-05	4.0619955325501e-05
pos_2081	7.79816105664718e-06	1.63022262815155e-06	5.43334443146548e-07	0	7.8184420400296e-07	1.93379870347001e-06	0	1.83155497540125e-06	3.35957625695489e-06	0	8.54722230918027e-07	0
pos_2084	2.73328300357346e-05	2.86999412042469e-05	5.64788027516685e-05	3.76402034117769e-05	7.03715523879728e-05	4.27591138857102e-05	2.43054190094137e-05	5.08178570262411e-05	2.80915466767363e-05	2.36027507771683e-05	3.48615308262499e-05	5.5677215440422e-05
pos_2085	6.98442742439916e-05	0	5.73522591753329e-06	1.75335840562104e-05	1.32518776273092e-05	2.31816019083387e-05	2.423688099674e-05	2.29050301059679e-05	1.41167656295678e-06	2.24436983338052e-06	1.24649582176416e-05	2.18146552392484e-05
pos_2086	9.59286142914417e-06	1.24785758493866e-05	1.12171926005907e-05	1.34253822089282e-05	8.65106563304702e-06	1.52454207615558e-05	1.13206939153372e-05	8.95794395130438e-06	7.6273156790499e-06	2.49423988761962e-05	1.29625024256256e-05	4.98662555520474e-06
pos_2087	5.24402334132051e-05	5.40461750009983e-05	4.95686371821785e-05	4.88769649891859e-05	5.20464522181483e-05	6.03318054603873e-05	5.26470769095209e-05	4.86069313400816e-05	6.35027024469175e-05	4.67196269133705e-05	5.51493010096065e-05	6.06261031921816e-05
pos_2088	0.00700249072092642	0.00318345192103108	0.00300133530402913	0.00266023240105667	0.00476117699643124	0.00479606313951926	0.00512799657231442	0.00405992758421598	0.00383783730602743	0.00377944750027391	0.00399567708286313	0.0041620430434135
pos_209	4.24848186757095e-05	3.42965093755649e-05	1.30267674280399e-05	3.20237564701112e-05	6.46168496785239e-05	2.80574646778215e-05	1.74839657278742e-05	1.66398600181735e-05	1.82876874848054e-05	2.62053820408948e-05	1.98480412549847e-05	2.09139656740084e-05
pos_2093	0.00131060892496729	0.00189648858357202	0.00217268504703627	0.00202014353332275	0.00143463861738714	0.00171928356890993	0.00142499970112095	0.00180756736793717	0.00152537652968184	0.00148346704073128	0.00168568593315237	0.00209471667173539
pos_2096	9.21395672942932e-07	2.998157744994e-06	1.82092105065276e-06	4.17694637874683e-06	2.04977664066002e-06	1.57860687870669e-06	1.47739318552262e-06	1.58816125540222e-06	1.63178592694684e-06	1.82567862619846e-06	1.6969085873197e-06	1.02462683596868e-06
pos_2097	0.000148122095930064	0.000128781773641097	0.000126872556600745	0.000103851311511718	0.000146264613863212	0.000123211619943635	0.000134919813115035	0.000129827274331743	0.000110512221473231	0.000135446093955965	0.000111571165731073	0.000147751504521486
pos_2098	3.11393491521915e-05	4.91511888595943e-05	3.03461520689915e-05	3.96149708211203e-05	4.34204384427858e-05	4.03653817542772e-05	3.46225661559125e-05	3.49569970295321e-05	4.46435538801529e-05	3.06967068993256e-05	3.42856092364558e-05	2.53404147050936e-05
pos_2099	3.31079892789512e-05	1.50195455446742e-05	4.8963479122039e-05	2.1319167512021e-05	2.7438307275641e-05	2.680256030968e-05	2.35702494808294e-05	2.42488300262176e-05	2.16609322035162e-05	2.05745716154567e-05	2.21368152552604e-05	3.33817733285296e-05
pos_21	0.00105411749482465	0.000597895813806859	0.000568840091111107	0.000513948243827696	0.000626212319569453	0.000644055189225656	0.000688256972240652	0.00063951556347853	0.000632422065748278	0.000586436785228363	0.000613857899992435	0.000626751668517456
pos_210	8.02208348794139e-05	0.000102993997755757	0.000102107087400342	8.67029786248027e-05	7.24482362329555e-05	8.61201795235919e-05	8.00315679587757e-05	9.20796513253512e-05	8.44789359277244e-05	9.14889226568088e-05	8.84931826605737e-05	8.71845979372555e-05
pos_2104	0.000380364699509173	0.000147629072356375	0.000146337508012642	0.000124630132984311	0.000130343750809167	0.000122689282348747	0.000138132260975826	0.000120704903405166	0.000119376739041164	0.000113894080404048	0.000120965108953552	0.000126627287157454
pos_2105	5.12441255337323e-06	6.93910509788228e-06	9.38376228619089e-06	8.1067883665382e-06	5.93501507161674e-06	6.91197187156719e-06	5.17959322960541e-06	7.2790473883206e-06	5.96266345633417e-06	5.56525618751044e-06	6.66375880232517e-06	9.62231548102716e-06
pos_2107	1.5684807639826e-06	3.50562223760737e-06	4.72855189930164e-06	3.48467233436344e-06	2.21029941940599e-06	2.37015746390358e-06	3.45428516558793e-06	3.71596887746404e-06	4.41526373792849e-06	2.84386517101532e-06	3.13408924028431e-06	4.34528466246455e-06
pos_2108	5.44518873708224e-06	1.15955393298556e-05	9.04953436478195e-06	8.12693445572003e-06	6.55707528513703e-06	8.29998377762797e-06	7.74569246973399e-06	6.70749892183246e-06	8.42049199712159e-06	7.55160465014856e-06	8.76544143875036e-06	8.45149230091401e-06
pos_2109	7.47246522198099e-05	6.49697814431792e-05	3.42877600443982e-05	5.61936965044454e-05	4.61371916538487e-05	5.65572105041583e-05	6.54662541103393e-05	5.06858351595253e-05	4.18946577298835e-05	5.35803155576324e-05	5.637652079292e-05	4.4962457825152e-05
pos_211	0.000184952607629836	0.00017676137513409	9.8154681575477e-05	8.55930627432335e-05	0.000220704459728434	0.000147738229696091	0.000100908303658983	0.000113563498168652	9.99360924884693e-05	9.0474559079514e-05	0.000109792829344319	0.000139055963137303
pos_2112	1.32740010993957e-05	1.11653423417789e-05	3.25451690410867e-06	4.73029417582897e-06	1.6066000712101e-05	3.70048373195878e-05	8.53223733684147e-06	5.69912671729702e-06	4.14195819793085e-06	7.56416854769425e-06	3.1523010057473e-06	3.5136763396562e-06
pos_2113	1.64718310161201e-05	3.28098120190852e-05	2.64239461909456e-05	2.66499392184623e-05	1.86158769154419e-05	2.42902230102253e-05	2.19554171472691e-05	1.98134108662871e-05	2.83763957920808e-05	2.37450286260539e-05	2.43425287596017e-05	2.32488524367236e-05
pos_2116	1.52697762238003e-06	2.56135126787903e-06	1.09924514507118e-05	7.66128109101983e-06	1.80169659742993e-06	6.44846934652694e-06	7.37196863795522e-06	8.33411816722981e-06	5.17914871013811e-06	1.98289427085232e-06	1.03433216558079e-05	1.18353330205944e-05
pos_2117	6.05239955491905e-05	8.91779837561626e-05	0.000123778381404438	7.69121393779189e-05	4.67931667680224e-05	7.12457531060092e-05	7.03882146516678e-05	7.42871480959632e-05	0.000187457125119579	9.87527117008009e-05	0.000105237882911601	8.70968285166266e-05
pos_2118	0.000129564708395062	0.000159543226897587	3.71475730933078e-05	6.22339612084608e-05	0.000111570961616848	9.34201905791098e-05	5.30825017477615e-05	4.62525466598457e-05	8.15585182463953e-05	7.30283286744815e-05	5.73559206247615e-05	3.98695540116375e-05
pos_2119	4.60541483816281e-05	1.18695224942481e-05	7.16490827691356e-05	2.63692633337974e-05	4.52471220948806e-05	0.000254856904689883	7.15583181854285e-05	7.06321372200864e-05	9.74065981990039e-05	0.00014527709803392	5.96467024307516e-05	4.54543782103048e-05
pos_212	4.98089889274046e-09	8.6298752299599e-08	1.99602264684694e-07	2.453712791461e-05	2.58707537832229e-06	5.16534633787101e-06	9.16648489721465e-06	3.55564764229218e-06	1.28264028284956e-06	9.40658451086792e-06	5.12358848666809e-06	3.33045556274442e-07
pos_2120	5.06157564982006e-05	5.54654863326717e-05	5.08986836105749e-05	4.91001953351963e-05	4.68880634714245e-05	5.34072077145685e-05	4.9353065857406e-05	5.33345094716802e-05	6.03112036154211e-05	4.50406252115027e-05	5.41332653531285e-05	6.12909023535472e-05
pos_2122	5.23114122661673e-05	6.61860494865881e-05	6.13334743385158e-05	5.56622102735305e-05	5.18263345575681e-05	5.74295970930128e-05	9.84123655554039e-05	8.71764070639232e-05	4.62680251228542e-05	9.04131185582185e-05	8.13568125371573e-05	8.37076014029753e-05
pos_2124	3.90776240387211e-05	4.65035848110637e-06	6.07397838568024e-06	4.09323063580869e-06	1.11055137284858e-05	1.24038938556444e-05	1.82373021060141e-05	1.52727834442095e-05	9.37069486827221e-06	1.13404995794609e-05	1.34217001233111e-05	4.93892188827998e-05
pos_2126	2.94470328063075e-05	3.12506413466355e-05	3.14030892230066e-05	2.94951055523948e-05	2.96372316683515e-05	3.11676894917513e-05	2.27136588227637e-05	2.91403055519565e-05	3.64209769407456e-05	2.66816462234062e-05	2.9890703105451e-05	3.5329907948511e-05
pos_2127	0.000137218923530953	0.000155750168141423	0.000176737741198772	8.10324452684475e-05	0.000201885247824817	0.000142128753633995	5.57425343054004e-05	0.000120556119824095	9.6144861211563e-05	0.000370652796686057	0.000148604280341751	0.000180628986168697
pos_2128	4.89339735949588e-06	1.34590592417407e-05	6.87376538679153e-06	1.26736726459491e-05	5.84914092557654e-06	6.91941049159445e-06	7.17569066077436e-06	1.07480114303727e-05	1.08710538218649e-05	4.55963843665433e-06	5.5228253412457e-06	1.09240620960083e-05
pos_2129	8.39801147997591e-05	6.39561287210397e-05	3.34394652334176e-05	8.21109589629087e-05	4.49213734426448e-05	6.00898352857905e-05	6.80011703451874e-05	6.76521821252175e-05	4.21473145807367e-05	6.75166536243983e-05	6.33737208782077e-05	3.87940652852906e-05
pos_213	1.03035162287383e-05	1.9107049838111e-05	8.37629999782233e-06	1.16649677550569e-05	1.60474505726808e-05	1.28797011055539e-05	1.44593557097777e-05	1.39340052564545e-05	1.45802205840684e-05	1.06761964206123e-05	1.28556554505475e-05	1.0789072060322e-05
pos_2130	2.00048272005784e-05	2.23183381363897e-05	3.2757050475813e-05	3.34221672902682e-05	4.28799429143063e-05	3.1793146568781e-05	3.07555801880024e-05	2.76297191023579e-05	3.32042593139716e-05	3.21994513426652e-05	3.29849638858477e-05	3.01165566194354e-05
pos_2131	5.60534289838857e-05	7.03678216105668e-05	7.02552320796946e-05	6.08345886424687e-05	4.97889096458312e-05	6.15147241890116e-05	5.33430502753486e-05	6.2006997950288e-05	7.03793513347929e-05	5.98933311434559e-05	5.62405543506944e-05	5.78998380844529e-05
pos_2132	3.04287831169887e-05	6.26838168430269e-05	2.4907940977663e-05	4.00366992293092e-05	5.94602779085077e-05	4.01552208441327e-05	2.53949133367564e-05	2.05625825028996e-05	6.61515126805021e-05	3.74739896622331e-05	3.65870287038458e-05	3.36338616793184e-05
pos_2134	2.82491352529398e-05	2.64599573521051e-05	9.84187299429003e-06	1.94257521587354e-05	2.47200777922947e-05	2.05263771416752e-05	1.81315469055958e-05	1.35549569831046e-05	1.76580464812433e-05	2.02308295139857e-05	1.8069021312758e-05	1.95414826495243e-05
pos_2135	9.18992950179399e-06	1.03366922838581e-05	1.65311968977786e-06	1.00787110466321e-05	7.10299183162954e-06	7.16004481271239e-06	7.92649876149082e-06	4.0077115945412e-06	3.28186518452472e-06	1.6580413446235e-05	7.8056092553946e-06	3.55830796604163e-06
pos_2136	0.00149176296927288	0.00122360750462854	0.00111460878140196	0.00102307049177474	0.00106241876469368	0.00119933166155741	0.00114338858684588	0.00114479216800429	0.00121192520456339	0.00108751978699645	0.00115662049119823	0.00113197224637593
pos_2137	7.79345031723228e-06	1.1151134521959e-05	5.52861986444261e-06	1.39204909051136e-05	7.71826527589527e-06	7.89449572845813e-06	7.71226385576157e-06	1.30576035199736e-05	1.07187207956324e-05	1.06230057186331e-05	1.16748189037945e-05	1.32241041903746e-05
pos_2138	0.000250793461694152	0.000311793792650228	0.000458700131231928	0.000289459182433455	0.000174793569936756	0.000267554761993063	0.000217740911660793	0.000303050573443221	0.000261236523095483	0.000214098451603201	0.000293160235133446	0.000246632857759152
pos_2139	8.07664313717267e-06	5.29774083865406e-06	8.36483105935722e-07	3.13252915962222e-06	2.31670838968421e-06	3.69869840822463e-06	1.66591774057428e-06	6.05934000530515e-07	2.4808863736213e-06	7.82911626910462e-07	1.88920760193156e-06	1.86664800961816e-06
pos_214	0.000162445420980072	0.00019410122488313	0.000210469640762885	0.00014539364089437	0.000155517941910136	0.00016417816225023	0.00012484754206369	0.000159678556479845	0.000162370474356943	0.000214921423441532	0.000172520967185662	0.000183901928946569
pos_2140	0.00384355133372948	0.00125134326121691	0.00113316411089878	0.000954311732549616	0.00181657510079009	0.00173154489546523	0.00179689299790782	0.00143754562394017	0.00131652692057349	0.00128568178466339	0.00138615224030422	0.00133376205657581
pos_2141	5.13025804295272e-05	8.45770946159619e-05	4.66761725641007e-05	6.23242284655517e-05	6.24302027530323e-05	5.64263415408501e-05	4.66340287402742e-05	4.62048235730026e-05	6.34233984215488e-05	6.89034416994524e-05	5.27351732583658e-05	4.79588699659486e-05
pos_2142	0.000578744580310164	0.000652552452454275	3.61347431796016e-05	0.000304212906614103	0.000628584383162663	0.000411832961233399	3.91212298098121e-05	4.0204140868438e-05	3.94080373704698e-05	0.000313834577719133	9.65743642621704e-05	3.9624726298035e-05
pos_2143	7.24510722312031e-06	1.15852969341325e-05	6.69341749769901e-06	9.18123080438697e-06	9.73014945529692e-06	8.02785116698327e-06	2.71490548700779e-06	6.54063252583729e-06	6.45819409881474e-06	1.13052291576262e-05	9.1164914314923e-06	5.28686141778742e-06
pos_2147	8.0497164855881e-05	9.47661433610126e-05	8.81477010424826e-05	7.82156882542097e-05	7.21495439321551e-05	7.92191211417475e-05	7.787078039366e-05	8.10381066324324e-05	9.23394307896001e-05	7.75482978943982e-05	8.27398182391838e-05	7.56962207234552e-05
pos_2149	1.06641987176e-05	3.40682536145318e-05	1.27978506907918e-05	4.9443583034148e-06	3.39971701278497e-05	2.06963023045575e-05	3.2165779343501e-05	2.85299231149869e-05	6.37793361611532e-06	1.86943972603723e-05	2.04268700787957e-05	2.5465726584697e-05
pos_215	0.000257859117246233	0.000424240288123345	0.000344425963308747	0.000388295317185365	0.000277611174519742	0.00033826631717196	0.000334733009040738	0.000317000785266293	0.000358380556339558	0.00035883326170701	0.000331133097772307	0.000286192596480138
pos_2150	5.0151710655341e-06	1.71766524500923e-06	1.19744427758938e-06	1.07809324268472e-06	1.80509253646436e-06	2.42582701659502e-06	2.30429562903013e-06	0	3.05123107111885e-06	0	1.92652259092727e-06	3.27941948841288e-06
pos_2151	5.60439495577819e-06	8.3110387549631e-06	1.40273975016928e-06	1.16534299441875e-08	2.55180524851851e-06	3.59307759554853e-06	8.70595534513904e-07	1.31200238758742e-06	0	3.89396316450397e-06	0	0
pos_2152	1.07352317859342e-05	1.15078659202717e-05	8.17944198582465e-06	2.29708161633981e-08	4.0126230584121e-06	2.66242256929835e-06	3.10645253186537e-06	7.58371121990257e-07	2.51632368152903e-06	1.89942139699461e-06	2.74864173342628e-06	2.87648811636005e-06
pos_2154	9.43947471220182e-06	1.61400662406367e-05	1.06322360472398e-05	1.42585121352341e-05	1.9586756477983e-05	8.86588200264937e-06	1.31963704738194e-05	1.00240407209151e-05	4.18545666956977e-05	9.37256066285797e-06	9.32586646781506e-06	1.27769210961225e-05
pos_2155	1.08192729040346e-06	0	4.17814025298135e-07	1.85919914838539e-07	2.08217274487187e-06	3.77695031917591e-07	1.21693090018307e-06	4.95645047606854e-07	0	2.75098812389528e-07	4.9709724393657e-07	1.37391630952939e-06
pos_2157	3.95666755654352e-06	3.76214175348091e-06	5.3917922206611e-06	4.52968964114105e-06	2.75014064394526e-06	4.74716215161591e-06	3.07098384491005e-06	4.57603222895372e-06	4.00040196065976e-06	5.10676843761384e-06	4.4413750569459e-06	5.91072767222246e-06
pos_2158	4.40548327089505e-05	4.87096694516003e-05	5.33129361740034e-05	7.07315417162826e-05	3.58098143223364e-05	5.31704747701709e-05	0.000129902559714265	0.000105969454534642	6.61846885796234e-05	6.21163889855879e-05	9.73023897994007e-05	6.49979019139092e-05
pos_2159	8.09542446849554e-06	9.93460440829283e-07	0	5.98703315857142e-07	1.98685515357455e-06	1.46111941287424e-06	7.79593817315804e-07	0	1.3441099620438e-06	0.000104373707189426	1.14750843604747e-05	0
pos_216	0.000574761693745954	0.000620621680755875	0.00058160225420609	0.000654426743929019	0.000550735148809652	0.000596357237349899	0.000571819037449935	0.000627419711279697	0.000623389639000456	0.000602321475558477	0.000628199580581866	0.000684414912849337
pos_2162	7.14398824044962e-05	7.32672432657274e-05	6.39615639782503e-05	5.70267454781999e-05	0.000104376896286482	5.41464366854913e-05	9.51703792303071e-05	8.68419677310598e-05	7.07731522351497e-05	7.86321378338574e-05	7.14385929656564e-05	9.6789638178907e-05
pos_2163	2.4615723921498e-05	5.91354617591669e-05	3.19932853073162e-05	3.15521869984874e-05	4.86092071067634e-05	4.86649703716165e-05	7.44719730599054e-05	4.39335285172298e-05	8.22422469379374e-05	0.000105040059002754	3.30770213795332e-05	1.29804101122195e-05
pos_2164	0.000100586169639116	0.000113429636685022	0.000120439384923893	0.000102261725071727	9.49561357965793e-05	9.57680784596947e-05	0.000121232538573643	0.000120281712922964	0.000104773404298097	0.000110145169093128	0.000103692060709169	0.000105857266217774
pos_2165	3.5903734172438e-05	6.24140987005419e-05	5.8209866581079e-05	7.56054659752629e-05	6.05196291979813e-05	6.79485716015405e-05	9.14991984788706e-05	7.07323665545011e-05	4.9318032768954e-05	5.93759151955627e-05	6.76258944686424e-05	6.19686415324732e-05
pos_2166	2.93980159783118e-05	3.69461795613185e-05	2.35272054472896e-05	3.12104116543762e-05	1.54429747112814e-05	3.41072404510486e-05	2.42733270847517e-05	2.92619009875326e-05	2.52360151933427e-05	2.28155357816665e-05	3.32427227738562e-05	3.53767263666548e-05
pos_2167	3.15054270876698e-05	3.32816531004582e-05	4.12818327350299e-05	3.65218030425895e-05	2.52313906611318e-05	3.08198793481569e-05	3.27827479258771e-05	3.15640678960429e-05	3.53574885890771e-05	3.05009159101811e-05	3.05610723504779e-05	3.05689290125435e-05
pos_2168	4.92150810108328e-05	4.08927922459094e-05	3.79487015848523e-05	2.57684187346281e-05	3.80517288555936e-05	2.94889343226261e-05	3.68827956742993e-05	3.94899839905375e-05	3.68605809548253e-05	3.66837163292636e-05	3.74861986097685e-05	4.12076585185785e-05
pos_2169	0.000822334247880501	0.00110844899825256	0.00104750046893106	0.000881089525531699	0.000762644825151853	0.000886097008599031	0.000798734695486567	0.000899171894405748	0.00102080154232035	0.000815151413306196	0.000881345811102233	0.000834812100558252
pos_217	2.83030404270828e-06	4.58126622142134e-06	4.24896303371306e-06	3.55902605306828e-06	2.50371361130897e-06	3.3266826149252e-06	2.96753550856787e-06	3.75133558748415e-06	4.43596217085492e-06	3.16960400165347e-06	3.34669857958829e-06	3.39068301326672e-06
pos_2172	1.36432299640174e-05	6.45967792115051e-06	0	0	5.32044012666141e-06	4.53625146176283e-06	5.80707567188402e-07	0	7.9761549586171e-06	3.0721005884084e-06	8.40674705117073e-07	1.83204678730368e-06
pos_2173	0.000659504995999968	0.000277910391932362	0.00021754599993219	0.000276184285712328	0.000428551450506144	0.000433301397552204	0.000422524986074744	0.000381554069263352	0.000314251343118731	0.000332477143276451	0.000386705713786656	0.000367565738502211
pos_2174	3.03094733208626e-05	4.57765872434096e-05	3.64184316116014e-05	2.94026415094545e-05	2.8973224880206e-05	3.40692889743372e-05	3.19031353176944e-05	3.29537423305497e-05	6.2005614479467e-05	2.82650219510926e-05	3.99108357769723e-05	3.83709484140277e-05
pos_2175	1.26571404627091e-05	3.514834352234e-06	2.45826884919968e-05	8.48288866489688e-06	1.72888397103832e-05	9.47954471410324e-05	2.89695858965e-05	3.11617232354661e-05	3.7038499506261e-05	5.72733810187072e-05	2.52259123186743e-05	1.79009581712316e-05
pos_2176	0.000557550286722852	0.00075587710148937	0.00177911006848421	0.00149600714143251	0.00125555168056355	0.00116230326700438	0.00104289352785541	0.000935518722699339	0.000821070815310878	0.000735492341069668	0.000910168584134543	0.000885009806050383
pos_2177	0.00212085471113024	0.00359616167563225	0.00202357823825521	0.00236357040319947	0.00229190814483994	0.00269558914947341	0.00204565149068489	0.00214264149309842	0.00279808724031414	0.00210604297999432	0.0023700188822287	0.00212945939356706
pos_2179	5.27306455167551e-06	1.25710148448618e-05	9.8911000301095e-06	8.55857561109726e-06	4.66742070742138e-06	1.11874362998736e-05	5.54497888659997e-06	8.42042308498331e-06	1.15194108827889e-05	8.50169575050714e-06	1.08513290758264e-05	8.37808647774259e-06
pos_218	8.76360013864739e-05	0.000103551976745287	0.000110778711684949	0.000117641511081396	9.44952556292891e-05	0.000118793088518968	0.000104893892937612	0.00011162184326099	0.000121100324874012	8.91871727826089e-05	0.000114933372714312	8.78973076126596e-05
pos_2180	0	0	3.94663470290798e-05	8.7240619559658e-05	3.18172902205505e-06	2.05254713675505e-05	0	3.95121100688228e-05	0.000111013105296323	0	3.62688275872492e-05	9.38026066897688e-05
pos_2181	4.23652509600547e-06	4.19573530716413e-06	5.31142309690933e-06	5.73952598327274e-06	7.2586242171764e-06	8.74452643406539e-06	3.91817670424176e-06	6.7593870554109e-06	1.13952002007271e-05	7.12444225568199e-06	9.53623443473152e-06	1.208342911402e-05
pos_2182	0.000113051246716882	0.000128016048495834	0.000104735723671931	0.000103479125893857	9.26659832512142e-05	0.000108699790030088	0.000102562379670151	0.000129110036614428	9.71292766813087e-05	0.000114330264772113	0.000102646460298155	9.84922427550799e-05
pos_2183	3.45389970969578e-05	2.72332216242187e-05	2.52630513673872e-05	2.87392071507409e-05	4.48199560153389e-05	2.72212721847459e-05	4.61433829816745e-05	3.93732266537002e-05	3.77102443985278e-05	3.14265009612004e-05	3.58810724538911e-05	3.24764252815007e-05
pos_2184	3.64412276626205e-05	4.7024877922682e-05	4.88544804019455e-05	3.94632195848878e-05	3.26242315519055e-05	4.21916043524366e-05	3.58170532267681e-05	3.96191270602544e-05	4.69501474326007e-05	4.3345054092334e-05	4.00700276377977e-05	3.78465349325922e-05
pos_2185	4.99207069411798e-05	5.71661209052485e-05	5.81346494525513e-05	4.67020603470729e-05	4.6249993628653e-05	5.39114137259738e-05	4.31694786849872e-05	4.64364675981324e-05	4.13609730842022e-05	6.53148465185785e-05	5.12335243190852e-05	5.56013258619121e-05
pos_2186	0.000389979825150108	0.000206514373239962	0.000194777469916308	0.000179189403658512	0.000209707539311342	0.000223106377507456	0.000231942555227543	0.000212395828995147	0.00021877130146365	0.000193476700771311	0.000206835659070127	0.000207152643515563
pos_2187	2.2300171462593e-06	1.49943022433886e-06	4.03308690051302e-06	3.87411423269537e-06	4.20662672690456e-06	3.55972008475088e-06	3.60560850969083e-06	3.51571713468624e-06	3.90424515063094e-06	3.29596512483362e-06	3.21377845443326e-06	3.52423100391031e-06
pos_2189	0.00633480572670358	0.00825912747199961	0.00746036297543805	0.0068003007562015	0.0057784313743923	0.00680863410800591	0.00609827053611266	0.00670657820032671	0.00745508685587055	0.00603060598486737	0.0067687600058824	0.00642752153024936
pos_219	7.65998313417718e-05	7.49704219051513e-05	4.24326899894744e-05	5.23187070707616e-05	0.000102747887431754	7.13979147929281e-05	4.18988965679432e-05	4.88897012244353e-05	5.5336458601679e-05	7.79156825284407e-05	5.08599634534013e-05	5.0654333217414e-05
pos_2190	1.6468462868374e-06	3.14036128589092e-06	2.26357177255874e-06	4.45456888266427e-06	1.69791556784416e-06	1.72566667842953e-06	2.29251702699859e-06	2.38136541496106e-06	2.92716733051188e-06	2.18611203090226e-06	1.97667777710146e-06	1.71305279324483e-06
pos_2191	0.000314654877251857	0.000187814639919368	4.19825912545813e-05	0.000100704986804761	0.000157240674571781	0.000145822520019375	6.40206713073059e-05	5.42304792506709e-05	5.96120754802832e-05	0.000133003172185503	6.30895311752978e-05	6.76672545869567e-05
pos_2192	0.000135497673892434	0.000110663171587337	0.00010003151668548	5.32899373656628e-05	7.85400181601917e-05	7.82204022482555e-05	6.44341042307777e-05	4.77398796837856e-05	5.45468381921281e-05	4.8052170767097e-05	4.64403051174801e-05	7.07693234307901e-05
pos_2194	3.09760809583367e-06	2.80657812120533e-06	0.000201337836068982	0.000422489750840674	3.92642047974313e-05	0.000146351459584577	1.66354214224596e-06	0.00019660097358223	0.000500035827655774	8.81874282811352e-06	0.000252599597788372	0.00047059918088289
pos_2195	9.38988700395841e-06	5.31365042667359e-06	3.63216176742778e-06	1.08545827833566e-06	5.62397443747261e-06	4.01073521123722e-06	4.08794814846407e-06	3.06225022328521e-06	5.91139955692567e-06	0	1.64260436113706e-06	8.72744393542493e-07
pos_2196	1.33596983046455e-05	1.79916144750811e-05	1.45715430456606e-05	1.25738260038678e-05	2.18155619504515e-05	1.50300876139465e-05	1.9475174880179e-05	2.44957197869696e-05	2.35501092400871e-05	3.14564743524474e-05	2.69186108559527e-05	3.5921053755078e-05
pos_2199	8.96301121205312e-06	1.34148385432485e-06	2.28827887026962e-06	8.56785380610699e-07	0	3.81458476479564e-06	4.28127851854417e-06	0	4.63995123855836e-06	3.3140755713762e-06	0	7.66206060565091e-07
pos_22	0.00371059785949516	0.00307647757265096	0.00411121621840005	0.00550001966205316	0.00482827859737639	0.00468163412906954	0.00562559106607099	0.00423129240645645	0.00444055865986892	0.00487875643580297	0.00476057552697837	0.00422877707210239
pos_220	7.68542489652734e-05	6.68515793440878e-05	0.000146764783278822	2.62070226532705e-05	0.000105352568695911	8.01733707816757e-05	1.9191654832609e-05	5.13620875253435e-05	2.20082971845503e-05	0.000262916035310951	8.35820664832983e-05	8.82444000624729e-05
pos_2201	1.52651923572481e-05	1.90016764394603e-05	6.32411788644893e-06	1.05287164950691e-05	1.0121259930944e-05	1.18744413745884e-05	7.60639576133944e-06	7.16133565178527e-06	1.22966295850384e-05	2.34544229142454e-05	1.3714876342296e-05	1.10207816101057e-05
pos_2202	3.28261667261905e-06	3.44702763379699e-06	1.57031847558196e-06	5.05840739383282e-06	3.14259247618784e-06	3.22433074165169e-06	4.7493202631896e-06	3.35633917975686e-06	7.80571365224153e-06	2.31591655010121e-06	4.41817834778365e-06	3.66638877518399e-06
pos_2203	6.86344148122482e-05	0.000105401152941636	5.84323844963681e-05	8.3060997052997e-05	8.15515336687234e-05	7.33739369095413e-05	7.73954700288465e-05	6.95631046591944e-05	9.02342394164169e-05	8.4422797770751e-05	7.14082558548101e-05	5.63423322446967e-05
pos_2204	2.9278266643697e-05	3.42953960450761e-05	3.74389947876981e-05	3.69613595016417e-05	3.67895812968327e-05	3.0877328982355e-05	3.0193757307667e-05	3.25942598591676e-05	3.40896607002865e-05	3.3543608077335e-05	3.10888674363378e-05	3.39428966263502e-05
pos_2205	0.000213984856803759	0.000248123633034943	0.000251889632773901	0.000217787112422728	0.000184581321987454	0.000209182369448579	0.000190796936059469	0.000210227588012606	0.000222547065941459	0.000227712558020664	0.000214990481769389	0.000212791796179292
pos_2206	0.00486812864754613	0.00686913567366282	0.00594041327015174	0.00646259650185054	0.00507226308488003	0.00612123372738505	0.00552961554576932	0.00566265593727248	0.00700979945069218	0.00528879958255302	0.0060918793625918	0.00518277204811119
pos_2207	2.00667054538262e-05	1.39424524358297e-05	2.60283319874502e-05	1.86508333437368e-05	6.55572520446865e-06	1.31618064101987e-05	1.36694826961862e-05	1.58529403072893e-05	1.56984038547237e-05	1.16231586022384e-05	8.69901773447783e-06	1.06910504262447e-05
pos_221	5.17653364983663e-06	6.79865453900511e-06	1.25424379477192e-05	1.40170062837063e-05	1.8769883767587e-05	1.14309364219755e-05	1.02469061458026e-05	1.07246788516856e-05	1.41926071678221e-05	1.06602123395873e-05	1.0937324757343e-05	1.05177709098244e-05
pos_2212	2.34334080224384e-05	2.0405945202407e-05	1.82696832915326e-05	1.65412300936037e-05	2.30996606653594e-05	2.64838424482661e-05	2.45351018511708e-05	2.23092052674788e-05	2.20819741840235e-05	1.8313717063101e-05	2.11755265323452e-05	2.10258214602198e-05
pos_2214	3.92518850998298e-06	2.84304652951494e-06	1.28413190340373e-05	2.88161502124256e-05	9.17648360279906e-06	8.56910428366476e-06	1.12022313981609e-05	1.34471376564511e-05	1.36903295294154e-05	1.28838151900407e-05	1.37663382827886e-05	2.68025805363004e-05
pos_2216	2.19759680310367e-05	1.14925160835313e-05	6.6277052182357e-05	2.21677070424663e-05	3.32615308903227e-05	0.000207242196686382	4.90407771670413e-05	5.54177844373486e-05	8.08912922373971e-05	0.000119080124438238	4.38563273022805e-05	3.45241434739189e-05
pos_2217	3.50411173562552e-05	4.35368822175474e-05	3.25983293520926e-07	1.74835049950224e-05	4.12308757833539e-05	2.40837821661211e-05	6.98450245997044e-06	2.30131437801194e-06	1.20898727267271e-06	2.19966285201795e-05	5.93522047948137e-06	3.63275017897762e-07
pos_2218	1.2398832645844e-05	9.24526602173704e-06	0	1.52361398621242e-06	1.52214112274094e-05	6.01225476192585e-06	0	0	0	2.7848740219841e-06	0	0
pos_2219	0.000353901094898488	0.000161945345053921	0.000175014260303738	0.000139427418398838	0.000231116425011001	0.000247274081563488	0.0002537704871906	0.000223314005801253	0.000199263907952587	0.000197035281161362	0.000214487406436354	0.000229770046615859
pos_222	1.00774963503255e-06	5.23598151287401e-07	3.4298737291759e-06	8.91088368257411e-06	1.34495805374536e-06	3.13736445710773e-06	8.82839797347313e-07	5.14770553899373e-06	3.53158221213209e-07	5.94219471647573e-08	3.2791862796782e-06	1.07833134865832e-05
pos_2221	0.000242659901320921	0.000233134208608594	0.000206720193916594	0.000235405101099329	0.000201940087940583	0.000216823628662381	0.000285105912362693	0.000245726830162415	0.00027238371885424	0.000272070812398608	0.000265439672753517	0.000231674805601176
pos_2222	0.000368134728883743	0.000476284970688403	0.000388772327399315	0.000377865385305169	0.000349112354556853	0.000386965811162174	0.000372139688290075	0.000368654239296548	0.0004421557065839	0.000352466890647138	0.000369771804546218	0.000345706828494936
pos_2224	0.000102113293548936	0.000130126206016543	0.000114791431546745	6.62309336468605e-05	8.04035191264517e-05	0.000110242857009095	0.000124739255913165	0.000148292904808106	0.000103344102072537	0.000100652984411641	0.00014100900541563	0.000253902939525508
pos_2225	0.00020407960418521	7.81092517688013e-05	6.55696236600296e-05	6.94810868243843e-05	8.37502191307909e-05	8.35974757270525e-05	7.49422882062228e-05	6.92946539192296e-05	9.10841071240559e-05	6.99877493612297e-05	7.12005841110326e-05	6.37041911108565e-05
pos_2226	7.53995883283602e-05	7.89418944507548e-05	7.30218372098261e-05	7.68478885894957e-05	9.96527197762701e-05	6.5205099775442e-05	0.000186815981350436	0.000132565861306094	8.25813885034055e-05	0.000115102788203717	9.88364589332852e-05	0.000103503562631583
pos_2227	5.62772064224383e-05	6.21325198477085e-05	4.67564062850082e-05	5.83376093356597e-05	4.12690447285176e-05	5.13636797932879e-05	5.54033243294361e-05	5.15691715151627e-05	6.72754783870188e-05	3.63561430612322e-05	5.02553865009697e-05	4.07820813633648e-05
pos_2228	3.58055609564871e-06	1.06373175470737e-05	9.75607234381912e-06	8.53577237553351e-06	5.19156992262258e-06	7.27145763929625e-06	5.53233604819836e-06	6.3521395525215e-06	9.30956290303535e-06	7.01872053976047e-06	7.47814489221442e-06	6.87411068404669e-06
pos_2229	1.18531416430868e-05	1.21221854490714e-05	1.13578758031654e-05	1.21295261943148e-05	1.09707852574034e-05	1.39047517751989e-05	1.23845837680716e-05	1.42305160382724e-05	1.26538897229128e-05	1.24577164364554e-05	1.21775227933782e-05	1.30469842333254e-05
pos_223	0.000127815415165859	2.28606097201211e-05	3.10073322926886e-05	2.46250149834989e-05	7.86281700753341e-05	7.07173277793271e-05	6.02332237407424e-05	5.17108680387223e-05	3.37072642059093e-05	4.52309887840684e-05	4.23660933791002e-05	5.00568025478097e-05
pos_2230	0.000243513916796587	0.000195902638768357	6.8328425824287e-05	0.000191857834976668	0.00012352584471655	0.000183680087644128	0.000697716968074904	0.000399915900529054	6.11364027757567e-05	0.000261105533150883	0.000304849514856002	2.96384285926176e-06
pos_2231	0	0	1.10666648592802e-05	3.33964574397402e-06	0	3.12314427654278e-06	4.32437968330666e-06	3.82681556413491e-06	0	0	3.91217387464809e-06	6.99970792839155e-06
pos_2232	8.40435960674468e-05	9.59192611552736e-05	4.21472645865105e-05	4.60046373341267e-05	7.90569230720145e-05	7.11884119485424e-05	6.87843676054408e-05	5.49645386420553e-05	4.71398622903733e-05	8.47472827092534e-05	5.95660141497837e-05	5.58063352573564e-05
pos_2233	3.97241333157718e-05	4.64428228121863e-05	3.8187165221488e-05	0.000221251557367694	2.13600606552801e-05	5.99608486258831e-05	0.000319354710893287	0.000200494599131448	0.000175519567327438	1.15749241286857e-05	0.000172657272316623	6.96806821383929e-05
pos_2234	1.12976907600878e-05	7.05096423883679e-06	6.0274798754268e-06	6.26184980638616e-06	5.73416879861459e-06	9.89307227188635e-06	1.15116575906677e-05	9.1264135153974e-06	9.79611225481662e-06	9.1253846956016e-06	1.00812058859888e-05	9.65517142833155e-06
pos_2235	1.13354272517149e-05	2.52801072017513e-05	9.1584019756923e-06	1.04784636047448e-05	1.39344683001281e-05	1.24437242429503e-05	1.02906212017499e-05	1.10350836328013e-05	1.47856231978871e-05	1.82634896279106e-05	1.3352322754129e-05	6.02162365127643e-05
pos_2236	0.000318281124348581	4.14625400692242e-05	5.0474726628569e-05	3.37894617472304e-05	0.000149980311933155	0.000142174700680304	0.000126706318038475	0.000109803223737999	6.89691848080913e-05	8.68003454148528e-05	0.000101280037798484	8.82672968302838e-05
pos_2237	7.5120328095785e-06	8.25256800453696e-06	0	1.8405469886444e-06	2.41435354428127e-06	6.0503396741447e-06	7.39514170445669e-07	2.5981375418073e-06	1.49644643062806e-06	1.36004204641564e-06	1.07905829713708e-06	1.05283609005274e-06
pos_2239	5.45212184994042e-06	1.82066138681808e-05	1.84277692530972e-05	1.85296126499188e-05	1.64429695740997e-05	1.61972083420225e-05	2.12539845509043e-05	2.67550951379954e-05	1.94512799102411e-05	2.73351384257198e-05	2.34547744232487e-05	1.70754116550424e-05
pos_224	0.000245119364503586	0.00025831556327589	0.000198361878475047	0.000256805060727065	0.00120321732395805	0.000271310622763872	0.00267262695816822	0.00157644789140625	0.000288730925613434	0.00145230157683969	0.000581184568589861	0.000820953603793671
pos_2240	2.57408566737434e-05	2.74894992325055e-05	2.25678907477024e-05	2.21972763960649e-05	2.12728350040036e-05	1.87695147044274e-05	2.23221574268588e-05	2.19686259339991e-05	2.2782755735697e-05	2.45460566837777e-05	2.18167240189907e-05	1.95440801616902e-05
pos_2241	1.10247638215202e-05	3.81821147617669e-06	1.11862847114496e-06	0	1.02164107317029e-06	2.50603158906447e-06	5.75900625476984e-07	2.77650192193473e-06	7.30837980509104e-08	3.67609137819528e-06	7.33280619243242e-06	0
pos_2244	5.04948043445959e-05	5.26086979778108e-05	3.40341236046842e-05	4.50645239480142e-05	4.62782961536469e-05	4.60228392771215e-05	5.4953745293709e-05	4.64822191780921e-05	5.49450499672159e-05	4.95044233334574e-05	5.22592778620273e-05	5.06366120614069e-05
pos_2245	0.000129205787444673	0.000121553502491445	0.000108000180703382	0.000102475577175422	0.000102012094934681	0.00010744078760863	0.000109382600670999	0.000111555894405933	0.00011302950273933	0.000106368460239628	0.000112708678862767	0.000106790876931723
pos_2246	2.90558525957952e-05	3.42277701670884e-05	3.58731500555858e-05	2.89745443963513e-05	2.71896491631735e-05	3.36128770689585e-05	3.10492811390759e-05	3.4615167732066e-05	3.75903379919985e-05	2.82004489956726e-05	2.93867553547869e-05	3.14536296205732e-05
pos_2247	8.90062026840467e-05	6.43044795767284e-05	5.34521739219127e-05	4.57699515318615e-05	4.61975957032653e-05	6.44929741106626e-05	5.16671470395488e-05	5.52362409900828e-05	5.47580663124932e-05	5.16513626228695e-05	4.52533033107515e-05	5.28203010986125e-05
pos_2248	2.99691573789716e-08	4.30294111109389e-07	2.91208607750465e-05	1.57304380644631e-07	9.40022041565355e-08	1.68368391307365e-07	7.5776232291637e-07	1.76850754870433e-06	7.08161611667704e-09	2.21813786575566e-06	7.35771196453514e-06	2.55559907527971e-07
pos_225	0.000396925678977738	0.000398410109505882	0.000412181906107489	0.000385050663547021	0.000367278088235955	0.000407616783583029	0.000292226131500842	0.000374133847425055	0.000448219081840334	0.000332823778172132	0.00038306859582583	0.00043748584400595
pos_2250	9.90485976966278e-06	1.98270390046423e-06	1.47505246651392e-06	1.73736237314369e-06	5.74801109961783e-06	4.50468530020132e-06	3.69656989183649e-06	3.57462431844522e-06	2.50081639046681e-06	2.92482283255742e-06	3.64137505930035e-06	2.66820682107507e-06
pos_2252	5.59345106969021e-06	4.91120431875746e-05	2.0733504304233e-05	9.46817778333853e-07	2.18122501516908e-05	1.60287827348891e-05	1.13280715796302e-05	1.00405981703949e-05	1.52343538381578e-06	5.22050134872103e-05	1.49218976901436e-05	1.25453862388707e-05
pos_2255	4.28723990098057e-05	4.39129403238659e-05	4.73569941425433e-05	4.69654381758154e-05	5.05243630649869e-05	4.7282252982687e-05	4.2675110745567e-05	4.5107135080527e-05	4.62006911449699e-05	4.36715085060928e-05	4.71271229427647e-05	5.49989259228955e-05
pos_2257	0.000125257746768255	0.000168697867280157	0.000149061157481297	0.000196155302697874	0.0001411184368571	0.000157865850868064	0.000191995153806432	0.0001687558585968	0.000155801060668625	0.000160460666555508	0.000163033284500416	0.000147923033282729
pos_2258	3.25428695246486e-05	3.36639032533984e-05	1.64263384009674e-05	2.39256273167684e-05	2.68638210016169e-05	1.79153336007093e-05	3.75368587766606e-05	2.77201287773318e-05	2.27476165352634e-05	2.68440529522964e-05	2.53722593690087e-05	3.20448773333357e-05
pos_2259	5.78653665607303e-06	1.60430223035918e-06	3.19927936980768e-06	1.68925593831867e-06	4.06449023736927e-06	2.94122785322238e-06	2.63350090398143e-06	3.06916659596771e-06	3.7715219414937e-06	3.10373563836443e-06	2.35887939090187e-06	2.7560125188851e-06
pos_226	0.00355221864896857	0.00213800113249676	0.00237303288061545	0.0022492167966746	0.00413685776848636	0.00273440391122377	0.00298553969649361	0.00335357716695805	0.00251916861258794	0.00385503962418653	0.00221285813533353	0.00336943986995608
pos_2261	4.709857128318e-05	4.88779450612855e-05	4.70534104619886e-05	5.6661278543225e-05	2.94283067719847e-05	4.33035460332313e-05	3.68552616579396e-05	4.33330451866291e-05	4.22645037532693e-05	5.86089467603922e-05	4.48864360952276e-05	4.27688710101635e-05
pos_2262	2.30747570376795e-06	3.2205861878453e-06	3.88101659571968e-06	3.06591646777927e-06	2.90769919403156e-06	1.25910577702775e-06	2.08115064064393e-06	2.19847691028294e-06	2.60789079916441e-06	1.98719644959534e-06	2.6542866055901e-06	2.59009035697715e-06
pos_2263	0.000168472724004162	0.000227200949640248	0.000391661418165005	8.1073879064522e-05	0.000237650772459535	0.000312586939467875	5.27064021882792e-05	0.000174812458794954	9.51785087096436e-05	0.000532250870596888	0.000263374911958564	0.000329645299167421
pos_2264	8.73539939910868e-06	4.02823325272518e-06	3.55962642010008e-06	3.40111543795635e-06	8.2184372541476e-07	2.70558094407792e-06	1.7958549539772e-06	1.91792813628293e-06	4.97030056049441e-06	0	4.62252054631674e-06	5.1526033504334e-06
pos_2265	0.000209019293523944	1.19477014631416e-05	1.92026406152446e-05	1.07475350682081e-05	9.70790022465385e-05	8.29577447504533e-05	7.17262306601632e-05	5.69570898553608e-05	2.63585364624761e-05	4.08922205977758e-05	4.74192805902293e-05	3.81657330516871e-05
pos_2266	7.72579374135352e-05	2.03867612361379e-05	1.69103499203632e-05	1.70181886892564e-05	4.45814601158141e-05	3.86777422889931e-05	3.86118207098505e-05	3.09876530403073e-05	2.41010550295429e-05	3.20204817162651e-05	2.98033748266212e-05	2.88407561340213e-05
pos_2268	0.000499538648191211	0.000365689487396892	0.000267341821736112	0.000306356998774828	0.000367260736442171	0.000378794666104633	0.000423876596103354	0.000350140282096546	0.000356394815787741	0.000348830469629106	0.000348214236509751	0.000335267084395012
pos_227	0.000167121344336185	0.000186013190373238	0.000173994806546197	0.000154236945736063	0.0001405536844283	0.000162218386921242	0.000154210942305518	0.000166435652382897	0.000174840212159914	0.000150291981122399	0.000165035041342118	0.000156416094221404
pos_2270	0.000230356624575012	0.000366458523292283	0.000191724185089291	0.000344055167820525	0.000274401403179552	0.000265057787993706	0.00028258137630601	0.000240681980797369	0.000320353275109393	0.000266164451146599	0.000264241523930719	0.000217041074729733
pos_2272	2.80496060952016e-05	2.75346010918162e-05	2.70125798279689e-05	2.5127111756632e-05	3.02116839517411e-05	3.49434397215638e-05	3.08075342879977e-05	2.81012540153978e-05	3.39336735193507e-05	2.49075304917241e-05	2.96434275299101e-05	2.74050033330889e-05
pos_2273	0.000181201431838275	0.000110439179503455	3.35835456720649e-05	5.83452215465452e-05	3.59582502166632e-05	6.33392064683269e-05	4.2373193488739e-05	3.9614783348699e-05	2.86491441198458e-05	7.1546301221552e-05	4.43163964665231e-05	4.21286546890207e-05
pos_2274	3.14257269830395e-05	2.41011738039024e-05	5.05498925459483e-06	1.61254220922417e-05	2.66840875361516e-05	1.94563814718067e-05	1.10519958658337e-05	8.85790573213916e-06	1.04886197056703e-05	2.34160022661326e-05	1.0773874868667e-05	5.52338248480165e-06
pos_2277	0.000141091311346479	0.000200980008585033	0.000207660002618156	0.000175885561217529	0.000151255333889612	0.000191427369543602	0.000164775877387715	0.000186631330930068	0.000205072951492111	0.000166362528615165	0.000182892682958729	0.000177732787977145
pos_2278	0.00108971721388233	0.00148354040617544	0.00131468242721586	0.00104737745289627	0.000910622592568717	0.0011731087393779	0.000867398317997638	0.00110458795557653	0.00101055225928873	0.00114603276055555	0.00115358992714499	0.0010755187022257
pos_2279	5.81248732716293e-05	6.2767069501219e-05	6.64228527851484e-05	6.26322847173692e-05	5.55356607066907e-05	6.03273088319992e-05	5.13611861639321e-05	5.8861226482394e-05	6.66542087076351e-05	7.75937490192712e-05	6.39995480511805e-05	6.31996316704585e-05
pos_228	7.23469654492012e-06	8.59619798579205e-06	9.86350273651753e-06	9.81470557218437e-06	2.58477330694062e-05	1.30251659653662e-05	6.56154667195006e-06	8.39262505360316e-06	3.47432043705269e-05	7.51692470566269e-06	1.51624501354244e-05	8.06440603255518e-06
pos_2280	8.34568719483747e-05	9.23945627305991e-05	7.52077992612186e-05	9.23350286377286e-05	8.62690083313899e-05	8.55313491336415e-05	9.38895574334716e-05	0.000103255978579377	8.81521630564025e-05	9.92771469784058e-05	0.000101094981640989	0.000125463319465811
pos_2281	0.000411153390841209	8.60504338370998e-05	9.48111938199012e-05	6.09038771958646e-05	0.000232756044162218	0.000219152441352522	0.000192851758132416	0.000167965949334359	0.000127340121308452	0.00014850259136256	0.000159751352134288	0.000135816988830162
pos_2282	1.59736204705e-05	2.45385115208437e-05	8.59615881149103e-06	2.30226517823061e-05	1.25237309542043e-05	1.3779893252429e-05	1.25205342925632e-05	1.2122672046224e-05	1.44056179636113e-05	2.81953734666622e-05	1.28877082864913e-05	1.31284559487604e-05
pos_2283	1.76710638055784e-05	1.04077311584894e-05	6.12961937270168e-06	7.27794845902033e-06	1.14045190594602e-05	9.09010493911645e-06	1.04957828442529e-05	9.23438270976285e-06	9.74627580387215e-06	6.91158317343185e-06	9.09828003335829e-06	9.63962350314723e-06
pos_2285	0.000321073426475373	0.000339598685620814	0.000287843375567507	0.000263953557915958	0.000337741011266455	0.000349004853820895	0.000322283074847152	0.000306322200952765	0.000357086488179215	0.000266744188846357	0.000318619874390546	0.000407588122932162
pos_2286	2.33979822661598e-05	3.22918320078475e-05	4.03792545574528e-05	3.02183448562528e-05	1.97570340419361e-05	3.19575668539953e-05	2.92529217269304e-05	2.86551860942139e-05	3.35713849346409e-05	3.04881137009767e-05	3.12977016911731e-05	2.64487534070901e-05
pos_2288	0.000477142137136997	0.000191357854355168	0.000184367704214032	0.000172258797673973	0.000229847379754405	0.000231229563295129	0.000259147245654343	0.000218960294669881	0.000202646863121751	0.000208694872469638	0.00021461256458898	0.000209786096477222
pos_229	1.83461499238835e-05	2.3904700977618e-05	2.87105994439566e-05	2.83512192549827e-05	2.26481723978056e-05	2.54590390492624e-05	2.10363688794316e-05	2.52686037957727e-05	2.16752654901423e-05	1.99911309115207e-05	2.31493730239486e-05	2.90770254515131e-05
pos_2292	0.000185478622966706	0.000110690998664448	7.58645463079893e-05	0.000145405080803264	8.29053033697613e-05	0.000132760060340468	0.000651686846987198	0.000358869341225656	7.3847658629377e-05	0.000100663904500502	0.000267016585653678	2.96201652928862e-06
pos_2293	1.95469888525595e-06	3.870862549684e-06	1.29945847513896e-05	3.09974603473294e-06	9.44316851058118e-06	7.08722107827583e-06	0	3.54259514520193e-06	3.5031437361142e-07	2.08102465929921e-05	9.88976754617904e-06	5.26423191687025e-06
pos_2296	1.43585525733902e-05	1.17982282243834e-05	9.76298367728436e-06	3.17688663229343e-06	0	7.78096854798695e-06	8.4733686661485e-06	4.29789065777195e-06	6.08637417075597e-06	1.97515525678807e-06	4.4380289296004e-06	8.70712264057576e-06
pos_2297	0.000182720787055515	5.98736021545291e-05	5.14084073640743e-05	5.01210357395921e-05	9.68922701540365e-05	9.23517708819243e-05	9.9641246159141e-05	7.12032548905456e-05	6.73725226493991e-05	7.12330779632968e-05	7.57393025851182e-05	7.44592587044907e-05
pos_2298	7.43944194919758e-05	5.46642110736462e-05	0.000284910902747502	3.5541653694895e-05	3.519719951856e-05	8.77038132220333e-05	2.24685578795922e-05	0.000100059929253961	2.82440109276578e-05	0.000168808084346057	0.000114897228183032	0.000252909702253356
pos_2299	1.54255667444901e-05	3.3856995248458e-05	2.1521995214458e-05	1.89933967408921e-05	2.4959821117109e-05	2.01509588043306e-05	1.70987737601672e-05	2.46504629192701e-05	3.64635194178137e-05	2.28798016263603e-05	2.39965683703582e-05	1.47691303755766e-05
pos_23	0.000196971721120794	0.000215853390303298	0.000422404664055866	0.00113268448766104	0.000163108475040866	0.00038045657851462	0.000261966269511697	0.000162231054223353	9.36450564494191e-05	0.000422031050568223	0.000189917675551955	9.43766336257728e-05
pos_230	9.08015486408707e-05	0.000129999435857698	0.000136243897656403	9.73006410675159e-05	7.99642802522101e-05	0.000107798218218954	9.48109797196352e-05	0.000103936582152315	0.000115834138156289	0.000101884301434581	0.000105359121819433	9.25880975710823e-05
pos_2300	3.80255105026747e-05	3.47863591731192e-05	3.52930689705235e-05	2.99069528854131e-05	3.87857778729762e-05	3.12543659224743e-05	3.76861686781216e-05	3.6360146553495e-05	2.98440390081665e-05	3.84904055284194e-05	2.74808136957038e-05	3.71842565063756e-05
pos_2301	0.000610895085012235	0.000165723680899444	0.000177435064617089	0.000144366674056956	0.000369024655470436	0.000358909731978481	0.000309519646069185	0.000287045479128691	0.000222979812516962	0.000233255985335782	0.000271192241976539	0.000248040869100187
pos_2302	0.00133706919131595	0.00193458375080202	0.00117155961653433	0.00143775268904157	0.0014613465289725	0.00156477883797614	0.00143569179599051	0.00143802021850278	0.00161940231215177	0.00136888676038185	0.00144277550806379	0.00141114692455125
pos_2305	0.000210189976393718	0.000238134079526735	0.000237092935427665	0.000262032704080135	0.000214217068604259	0.000228723959777915	0.000243620857548302	0.000227821089897334	0.000241478577416682	0.000236700917334726	0.000234197153823495	0.000199786276370488
pos_2307	6.06097302199224e-06	6.00115815101288e-06	1.52457057376009e-06	0	0	1.65833247434613e-06	0	0	6.47258845760221e-06	7.45994550353516e-07	0	0
pos_2308	1.1283111973446e-05	1.31157428635466e-05	1.31147066173983e-05	1.22744926732681e-05	9.95974742145154e-06	1.14001572539083e-05	1.10279464645974e-05	1.18552260178498e-05	1.39905848246111e-05	1.10114531449386e-05	1.15561563773427e-05	9.70710894391877e-06
pos_231	0.000241688230363641	0.00028672908276947	0.000491825474237094	0.000135091332859086	0.000314546957450399	0.00029050187793884	0.000136864313572772	0.000250261548251779	0.000151974400582771	0.000529744085541942	0.000307568664447269	0.000373513952161016
pos_2310	1.84060856978479e-06	5.26461286632021e-07	3.65988478431193e-06	1.97395539664508e-06	4.4482658713453e-06	2.53586484813494e-06	2.83684302256276e-06	1.48896089613704e-06	1.93736026333714e-06	3.12012998469056e-06	1.30421328012412e-06	1.93436383600888e-06
pos_2311	0.000339128080974653	9.65118936123282e-05	9.74845681342615e-05	8.28856620600628e-05	0.000199983821735024	0.000198175593504174	0.00018617523193516	0.000162154340299913	0.000121267424567265	0.000134138053861604	0.000148660570763368	0.000144103806949667
pos_2313	5.49940246887385e-05	8.19852724469025e-05	0.000123986614636118	7.2237584317503e-05	4.24856213015472e-05	7.65662460066032e-05	6.67002633117546e-05	7.28677979814315e-05	9.19043576447341e-05	7.0627289508526e-05	8.16442497904375e-05	6.2529677745883e-05
pos_2314	0.00139714716215196	0.000850795641605517	0.000604639031589556	0.000651147324170038	0.00101601875701667	0.00100098461253023	0.00105990256888942	0.000822080489057872	0.000911158518294922	0.000855828051546889	0.000869506232717264	0.000821093279098784
pos_2316	0.000162861914206007	0.000268282348906923	0.000193083446556627	0.000154559873564942	0.000190424449874108	0.000178352752394271	0.000277751087577364	0.000247173713543034	0.000162720714561746	0.00019251921745154	0.000230022562702818	0.000206824401143307
pos_2317	6.57019797794979e-05	9.59767505879802e-05	9.21445626589482e-05	8.35208763538272e-05	6.97299692465111e-05	7.52897959117742e-05	6.31740285457349e-05	7.61449448434273e-05	9.03413903566177e-05	7.14659446550055e-05	7.38348090197468e-05	7.21282134656777e-05
pos_2318	0.000171787975170819	8.99696766823771e-05	0.00042399134463385	0.000359567480645653	0.000236179720575181	0.000206920199390454	9.86379448903379e-05	0.000178083582754667	0.000204408654883913	5.80164957118713e-05	7.84723974591668e-05	0.000118990233356759
pos_232	6.83912384499776e-05	0.000117059954665595	6.87987754203305e-05	0.000122302863029261	8.02603277829455e-05	9.529170947551e-05	7.31619966231576e-05	7.63747056855997e-05	0.000188904198945283	6.92257935370149e-05	0.000134443913998411	0.000124644916838896
pos_2320	0.000289151133729743	0.0002685567943576	0.000192845595783422	0.0001524153353336	0.000193020256044242	0.000193422538263953	0.000183115880772781	0.00015830030445088	0.000174826871935417	0.000160692092536862	0.00017553021948364	0.000172285996347244
pos_2321	1.74098899714332e-05	2.91198388397907e-05	3.02109878548469e-05	2.72295118665325e-05	1.51845100328356e-05	3.03666054377073e-05	1.83710452020822e-05	2.69232673468737e-05	2.81647203619472e-05	1.91298085356766e-05	2.46839481200146e-05	2.03644526115958e-05
pos_2322	9.45619330348328e-05	0.000124429638416931	0.000114461747646748	9.70786912205853e-05	8.11388047388244e-05	9.56165612673457e-05	8.67634748419579e-05	9.72920464191459e-05	0.000110525730698488	9.1810967309245e-05	9.67527028225337e-05	9.27924185925843e-05
pos_2323	4.94543728959299e-05	2.02414701750751e-05	1.57896681574002e-05	1.66665220211971e-05	2.61009629617459e-05	3.00745278495348e-05	3.13613974739281e-05	1.93624534080314e-05	2.0857663080981e-05	2.27175192634809e-05	2.81154745362542e-05	2.51377002847597e-05
pos_2326	0.000189557093541976	8.73777297718629e-05	0.000226864251258331	7.23095662648886e-05	8.07665319404296e-05	9.94589851398823e-05	9.12818114389569e-05	0.000102766871979669	7.80575726262909e-05	0.000155142895395942	0.000105162106255553	0.000128322263178335
pos_2327	0.000368100283686745	0.000351243318524951	0.000311723578216857	0.000359595157956941	0.000364811882437993	0.000326871486159312	0.000619918454619391	0.000438848304314384	0.00045558082275077	0.000444978046984619	0.000453446053916211	0.000326987530007893
pos_2328	5.22127375199092e-06	0	0	7.00602347172057e-07	1.88489923934352e-06	2.41636312454555e-06	2.8963679894294e-06	3.00682139986641e-06	1.92467585623698e-06	7.17353857636619e-07	2.93317016185102e-06	1.09795174024318e-06
pos_2329	4.27039827289438e-05	3.1722684206982e-05	2.5201473867592e-05	1.45855989254215e-05	1.85123214328986e-05	1.01318625594882e-05	1.23251148047795e-05	9.97208410346896e-06	1.05974930285103e-05	7.15365929101591e-06	1.47105554517998e-05	1.91831585197803e-05
pos_233	0.000205387194893177	0.000246723276630994	0.000253646940421986	0.000217168087287404	0.000182497153153431	0.000212589729925899	0.00019567839787246	0.000244932411064279	0.000230553298253078	0.000224951045274426	0.000225329802307909	0.00021269506507874
pos_2330	0.000152812366140304	4.12982804616924e-05	4.63921377182018e-05	3.46884616738934e-05	9.3761076228894e-05	8.95794219986877e-05	8.15970981663545e-05	7.28739470065598e-05	5.7309328630993e-05	5.93958590431833e-05	6.89913619874362e-05	6.39765541654024e-05
pos_2332	2.15104065355844e-05	1.89554642636277e-05	1.87900289686271e-05	1.79702222573245e-05	1.69793380215273e-05	2.2057077003167e-05	1.95514531868853e-05	4.69561852101513e-05	1.56369474734598e-05	2.67298138582658e-05	5.96111627335851e-05	1.32624265426325e-05
pos_2334	9.95263523375336e-05	0.000112262154850432	9.10968213839375e-05	0.000101484491758076	8.28172616235878e-05	7.16902436151825e-05	7.51361919432124e-05	9.93464732308828e-05	8.75412424177915e-05	7.12443565532275e-05	9.63854380947206e-05	0.000132932302381255
pos_2337	0.000217336733455198	0.000264117085481984	0.000242188439951855	0.000196862902980356	0.000207323946927564	0.000268569642600063	0.00021296632765557	0.000232893464485687	0.000274808271170358	0.00026299592127613	0.000239098833641428	0.000228683303929826
pos_2338	9.72454053712066e-05	9.1850122817622e-05	0.000118832442968965	0.000124336159083111	0.000163930957355917	0.000119080020548657	0.000100349075290403	0.000109320473628195	0.000127943813558121	0.000162097888218942	0.00012235094734422	0.000127403026184956
pos_2339	3.36663435082313e-06	1.1101901745821e-05	1.02972308996771e-05	1.1675506468171e-05	4.50392061465578e-06	8.87924902355009e-06	2.19901734759324e-05	6.98394512962993e-06	2.22236098715327e-05	9.09706219838129e-06	1.75038428368262e-05	1.85099037683498e-05
pos_234	4.48645274109389e-05	0.000110252155311197	2.01981510666445e-05	5.89177868301576e-05	5.08237992204618e-05	5.55692343696803e-05	5.64242896193137e-05	3.8960410848429e-05	4.31316204211024e-05	3.68104916153013e-05	4.24093594326669e-05	2.29270898199497e-05
pos_2340	0.000135974139443774	0.000132224712395954	0.000134589256907584	0.000106627063737616	0.000133482488793866	0.000120605471243034	0.000145909778605739	0.000127697072440747	0.000109866187396225	0.000149247213087234	0.000106384808136613	0.000129706017413007
pos_2341	0.00110885765190872	0.00150738587914478	0.00213941310909843	0.00157648751227705	0.00102296279860815	0.00146330117127722	0.00114489808181324	0.00154091988244958	0.00142426237086143	0.00113123515050266	0.0014992135052734	0.00127076975131841
pos_2342	3.99319970557736e-06	5.98480693828869e-06	6.20510513416461e-06	6.9591539307669e-06	3.82730122232251e-06	4.90780461173879e-06	4.21000978059472e-06	5.13433720425171e-06	4.3145032815227e-06	3.4194258519957e-06	5.20339874602995e-06	0.000135579683907791
pos_2345	1.06945947376637e-05	1.72582121396828e-05	4.79617026094125e-06	1.00300149316173e-05	1.08755142738873e-05	9.95225602172339e-06	9.19889739382473e-06	9.15692187087346e-06	9.23074609050094e-06	1.16880795537223e-05	7.20781917949039e-06	5.13389169294181e-06
pos_2348	5.29817859063337e-05	6.35563913414633e-05	6.66409090499753e-05	6.92578729147482e-05	4.77140389908234e-05	6.46609502505191e-05	5.5663964809694e-05	6.53239600145263e-05	5.54454539291349e-05	5.49379714412444e-05	6.29150715876442e-05	6.34952142772898e-05
pos_2349	3.3147722326525e-05	1.25951135571647e-05	8.82526336963914e-05	2.97193657548255e-05	4.37920846628552e-05	0.000291195468765919	7.36380367868607e-05	8.25708126733939e-05	0.000108625501513186	0.000164488708114983	6.84009762200424e-05	5.15755076911009e-05
pos_235	0.000136574954397291	0.000318836426541789	0.000205335897011534	0.000221871087901602	0.000158361796217731	0.000161233435021077	0.000180964025023914	0.000166434079503008	0.000169746432061933	0.000130602613002927	0.000138127483861583	0.000149994190100458
pos_2351	0.000337916831424007	4.25679149155903e-05	5.28686468853729e-05	3.60530661311422e-05	0.000174692007944035	0.000155355645661895	0.000133572989120873	0.000107913224712251	7.08176236535908e-05	8.07256190468395e-05	9.67716512236521e-05	8.53742877136671e-05
pos_2352	4.59958828198363e-06	1.36314599300327e-06	8.59226588078616e-06	1.17708535537978e-05	0.000112943998734899	3.15906230747137e-05	1.0972254853018e-05	1.52680744737861e-05	1.99559360199324e-05	5.90125786638428e-05	3.21162751031969e-05	3.86541988739917e-05
pos_2353	7.92067342040611e-05	9.08056972041855e-05	7.9379272585127e-05	7.98690709974299e-05	5.46051105419294e-05	8.26002411884215e-05	6.75580451050178e-05	8.34500965564422e-05	8.66671670571051e-05	6.33638588611179e-05	7.53518508000621e-05	7.41276480023299e-05
pos_2354	0.000132875624690278	0.000149136115948454	0.000138197091710108	0.000134776641875588	0.00014129979428607	0.000131501201482498	0.000145443516771697	0.000122680367241143	0.000152371055146974	0.00014226685020119	0.00013931570664144	0.000137901380590394
pos_2356	3.95913933302946e-05	1.19362618491995e-06	1.91660435036542e-06	7.45193142829317e-07	1.43255559312781e-05	1.30240820946376e-05	7.79793184340857e-06	9.05516945028171e-06	3.90395707491179e-06	5.7080121247642e-06	5.27128028164032e-06	6.38466544868061e-06
pos_2358	5.54973444371038e-05	7.54297775209504e-06	5.14759103380473e-06	6.19642026861756e-06	2.43790312280891e-05	1.78118496828395e-05	2.26788928415443e-05	1.40135487995944e-05	9.13224049548333e-06	1.47627164884182e-05	1.23494835230578e-05	1.60802408436391e-05
pos_2360	7.35652848509634e-06	1.4147784341755e-05	7.15132010990212e-06	8.1435328372779e-06	9.59035910461247e-06	9.18670832311326e-06	6.88933180611978e-06	6.12094871675329e-06	1.15298974406778e-05	1.03267340299111e-05	8.48362542893147e-06	7.02495738695491e-06
pos_2361	2.77147469639568e-05	4.16796115142559e-05	2.15427552225039e-05	3.59908350968079e-05	3.70357481584773e-05	3.12237516115649e-05	3.66222469940795e-05	3.60759467519962e-05	3.36373557907755e-05	3.95207513263569e-05	3.47627450696247e-05	3.5176202211265e-05
pos_2362	6.50419270924965e-06	4.04635608163833e-06	3.94282820571273e-06	4.17005848257969e-06	5.07245800359582e-06	4.00924496683539e-06	5.25647971247537e-06	4.9545655489342e-06	5.49922530980779e-06	3.54715101641098e-06	5.62879578065737e-06	1.08324615776793e-05
pos_2363	6.98835967882063e-05	0.000135412860949076	6.91607327819511e-05	0.000141191629545234	7.6666067382952e-05	6.90349696884902e-05	6.93051040679194e-05	0.000118780651834293	0.000110533557456827	0.000130243818694702	8.10166711798327e-05	8.30212353636031e-05
pos_2364	0.000958277683086518	0.000999872944612255	0.000946474281863445	0.000885938082536561	0.000773943903363754	0.000904990136460836	0.000872027986558194	0.000931366685722556	0.000968639225447638	0.000850356820880262	0.000912123724695597	0.000913072751119389
pos_2365	0.000825387718324878	0.000548183162712368	0.00110115336295095	0.00323430767560947	0.00234711526184988	0.00164097386649371	0.00281559653719966	0.00174752122358735	0.000534583554775372	0.000537875871985338	0.00133603358940991	0.000521985443322247
pos_2366	7.59448384930621e-05	9.36683498561704e-05	6.85876168521065e-05	8.98007967737822e-05	6.76700161372892e-05	7.23247509448201e-05	6.41839636828368e-05	7.36158078669565e-05	7.03802184086331e-05	6.26910019320541e-05	6.66719797222162e-05	8.17478116108622e-05
pos_2367	0.00135780036812065	0.00083404755449229	0.000829082805634884	0.000696988703729157	0.000793655567246409	0.000845499094161949	0.000870646490533344	0.000878298840333095	0.000885022992124957	0.000755348700688269	0.000811305023031306	0.000772183040592241
pos_2368	0.00030403652858651	7.67169635801132e-05	9.20981417201493e-05	7.07493425682574e-05	0.000185346436045112	0.000177744750360485	0.000167348804343251	0.000143660086977495	0.000107380024535701	0.000123477629452332	0.000137634347967197	0.000125180692472058
pos_2369	0.000478887526606532	6.30050228395459e-05	7.22474451112687e-05	5.20300948479404e-05	0.000235877132799705	0.000236941231378488	0.000192910169064795	0.000163515942806562	9.7046421901332e-05	0.000119091973789305	0.000159035490557299	0.000130768840886889
pos_2370	8.11024478207463e-05	0.000143067785489457	0.000145054379702656	9.80657788802937e-05	8.3065976540967e-05	0.000115849437153238	8.79941833075566e-05	0.000108800054999529	0.0001411538090685	8.78652995172454e-05	0.000112603549770195	9.1802281809478e-05
pos_2372	6.02138340026811e-05	7.36079469649114e-05	7.53457208768264e-05	7.70775634276424e-05	5.19160421464917e-05	7.12149028151023e-05	6.29897201124529e-05	7.67588151466174e-05	6.8959703180926e-05	5.78122819697776e-05	7.39209640944951e-05	6.95555525561897e-05
pos_2373	1.47394318304597e-06	2.72473657777219e-06	6.32208103774947e-06	0.000134523997638246	0.000108193619217767	4.81499632991071e-05	0.000123171613807175	6.1408485751463e-05	0	6.63566807728104e-06	4.02251864718044e-05	5.08187192953212e-06
pos_2375	2.36662513724694e-05	3.0625927810392e-05	1.03779091775046e-05	1.581914660579e-05	1.69591165103255e-05	1.4892337438295e-05	1.6984275800607e-05	2.06617930218498e-05	1.59941317542951e-05	1.57123438833654e-05	1.55386535877236e-05	2.1979712564529e-05
pos_2376	6.4091905421325e-05	7.81714511367182e-05	3.72685078039671e-05	6.86895085266384e-05	5.305041680768e-05	5.07343434296194e-05	4.51019749042049e-05	4.49126557730878e-05	5.1677316918423e-05	7.23920947797718e-05	5.14511268815484e-05	7.18062535365974e-05
pos_2377	2.77915772823481e-05	3.83992449909033e-05	5.33779478891249e-05	3.99519198308146e-05	3.15632337839323e-05	3.78632705628757e-05	4.88533377318759e-05	4.19861912940036e-05	3.33158465639292e-05	3.5424905235057e-05	3.92402251650082e-05	4.28342974564714e-05
pos_2378	0.00513606779463539	0.00187626227242738	0.00190914668504251	0.00159562105571703	0.0023186961491191	0.00237294897396803	0.00257873706832193	0.00223227462516075	0.00209171336865072	0.00205127826289518	0.00225267253222958	0.00228069014500702
pos_2379	3.86090007700794e-05	6.06849623394355e-05	5.2081928453725e-05	6.29019050592845e-05	4.87082989473051e-05	4.76563194814349e-05	3.52256443618118e-05	4.55641017850022e-05	5.58438406293181e-05	4.78683307415893e-05	5.45242453017078e-05	5.12302364228269e-05
pos_238	7.49905239091231e-06	3.29811045074954e-06	2.54863049081412e-06	0.000144187337163334	2.48408012305789e-07	7.58702873830038e-06	5.30559522759072e-06	4.32777241851711e-06	3.17453142050703e-06	3.39924663913297e-06	3.09253375819861e-06	1.62531970811098e-05
pos_2380	0.000196445854013536	0.000173234922433091	0.000173057162306537	0.00114264216410713	0.000140947363789885	0.000416811073913203	0.000161448824167207	0.000163308708926911	0.000154732276685466	0.000163926683305467	0.00016222789977218	0.000156879300446923
pos_2382	0.000345417891112186	0.000319048204693631	0.000259158519364071	0.000305746442932563	0.00036301841437384	0.000324183769933264	0.000318351450198052	0.00028842465949542	0.000350585119221804	0.000319065527099413	0.000320872390910453	0.000271272094493671
pos_2383	0.00139079631537972	0.000852563326016087	0.000772423297552756	0.000684649289127126	0.000778114138578578	0.000798869526314543	0.000858400604162433	0.000817564325589787	0.000803146426334236	0.000775952436173985	0.00077000941018699	0.000753761910546719
pos_2384	2.85814240986e-05	5.01070214202047e-05	3.3212091944228e-05	3.50213504874462e-05	4.24563147268801e-05	3.52112867499924e-05	2.54109879645517e-05	2.99419971519163e-05	5.74845482190082e-05	3.56303454938445e-05	3.7320528528433e-05	3.44991840703467e-05
pos_2385	4.97814755321638e-05	6.88025958260558e-05	9.75112337616202e-06	4.35970758556301e-05	2.57369090188838e-05	3.4031858908755e-05	2.88875945957296e-05	2.01753071805059e-05	5.85907123942699e-06	4.79146386418179e-05	2.71044452031417e-05	1.46227215459085e-05
pos_2387	1.09136011484554e-05	1.12959557842661e-05	1.03967455059518e-05	6.59483566313821e-06	9.16213535400378e-06	1.30384833657619e-05	1.18728230447247e-05	1.06399244980393e-05	1.21943436023697e-05	8.77101706746228e-06	9.6233471337923e-06	8.28742100465696e-06
pos_2388	5.63180481419547e-05	6.68987874057057e-05	6.24494930929475e-05	5.67611251367099e-05	7.58033909396618e-05	5.45547848160515e-05	0.000147526780909741	0.000109232925816315	8.83317074936292e-05	9.54412918124529e-05	8.65664332553675e-05	8.92508223399601e-05
pos_2389	3.92673517754288e-05	3.42682552337498e-05	8.98784970002413e-05	1.07473454893288e-05	4.97297470588419e-05	4.46379031652351e-05	2.96122152014469e-06	3.27533148538371e-05	6.53516203681906e-06	0.000119904743673666	4.53976605161347e-05	6.23175371054809e-05
pos_239	0.0013214890170955	0.00122251668029481	0.00286268325856734	0.00257802779403919	0.00322641847412911	0.00249853310974918	0.00215002029726296	0.00202068777796143	0.00294397849824682	0.00232874385656426	0.0024423746230049	0.00228771462421306
pos_2392	0.001538462908499	0.00159075737392506	0.00159810729761374	0.00134562753623272	0.00123643583301143	0.00147046806592357	0.00165004130889447	0.00163957795680806	0.00150090529257942	0.00185111201167434	0.00164642531816513	0.00149401262391014
pos_2394	5.40743856942161e-05	2.91269343470001e-05	4.68405060789731e-05	2.77474169757399e-05	3.22028382026003e-05	4.68479506495799e-05	2.66224682270602e-05	4.63261193339308e-05	2.66442562214238e-05	3.70837547171611e-05	3.85475528426171e-05	3.53131949877253e-05
pos_2395	3.5551676172132e-07	1.6704949803189e-07	7.77726400864349e-06	1.93490966756571e-07	5.93896078310064e-06	2.72959386393825e-06	6.43388826116455e-08	6.56298279145969e-07	2.78396700780416e-07	7.93425257478883e-06	2.99760119791676e-06	5.02318284092798e-06
pos_2396	9.66173402228825e-06	2.02413533725463e-05	6.30005255696863e-06	1.41207680842798e-05	2.76318178022312e-05	1.52446437733585e-05	9.63785992122141e-06	8.84030461217182e-06	1.47452347796082e-05	2.30829373816506e-05	1.25752861503894e-05	6.88449985918931e-06
pos_2397	0.000244755469047869	8.57011979889575e-05	8.00989324364577e-05	6.50958329037023e-05	0.000137878486096303	0.000133375972079352	0.000135039580418837	0.000135731290984211	9.39334193343628e-05	0.000108497077713722	0.000120294933485124	0.000141509783109327
pos_2398	0.000526232727623883	0.00022175066077204	0.000216426804663497	0.000187980026739692	0.000343844702729502	0.000363060794728724	0.000373882018759382	0.00029868082698016	0.000275797185917896	0.000275687910152934	0.000297654972788203	0.000301124093523725
pos_24	4.31967143397912e-05	5.55166578276255e-05	5.05025760045397e-05	5.37555088136287e-05	4.98126572049303e-05	5.05983479018331e-05	5.81023453254669e-05	5.44401940073126e-05	5.44208877616471e-05	5.20064894876656e-05	5.30476721333883e-05	5.81091827695296e-05
pos_240	4.17752569596032e-05	3.48029976660336e-05	2.90679921402125e-05	3.55328318826888e-05	3.5372726564161e-05	3.21342246271601e-05	3.28684566550092e-05	3.28366270411349e-05	3.84365576752243e-05	2.88632723457427e-05	3.41297318832712e-05	3.44868251584377e-05
pos_2405	0.000311368122981849	1.44495754348593e-05	1.9796735172266e-05	1.21977302468597e-05	0.000146072445130955	0.000135340100935325	0.000107137757660796	7.62504859118458e-05	2.68326812446694e-05	5.11825126588183e-05	4.91543764929227e-05	4.43915737513203e-05
pos_2406	0.00010446950010812	5.66198303312269e-05	4.96254067634599e-05	4.51193897593529e-05	5.64403830866036e-05	6.67103980964479e-05	6.68642823816414e-05	5.93952781755706e-05	5.90587134688033e-05	5.53434062843376e-05	5.4086177421034e-05	5.87351524612905e-05
pos_2407	1.68557597617705e-05	1.19739504582608e-05	7.23852289289557e-06	3.17766480874798e-05	3.66871186488959e-06	1.63318644811377e-05	2.40273446233938e-05	3.27740086910142e-06	1.40622079457053e-05	2.08491263641502e-05	7.76361124300033e-06	1.92382507897198e-05
pos_2409	5.56081603182163e-06	2.9839235410234e-06	2.13876141608214e-06	2.04420176027783e-06	6.61044740479185e-06	2.49732141040081e-06	7.2016183973862e-06	4.33740336468357e-06	2.9548219999843e-06	1.64860651512288e-06	2.71405472991867e-06	8.55228988014647e-07
pos_241	2.71072746101918e-05	3.08937043501573e-05	3.83068435416126e-05	5.93574746242763e-05	0.000126922532891998	7.28692027479819e-05	4.52396689678178e-05	6.62348804012264e-05	5.15530655349433e-05	8.68880447616813e-05	7.66468982420012e-05	9.67073821836055e-05
pos_2410	7.45564521350911e-05	0.000103125132044607	0.000102099081206779	8.12851964141011e-05	6.81772107519798e-05	8.36126024702003e-05	8.18993357424875e-05	9.00691736488847e-05	9.44763799035613e-05	7.36349943825033e-05	8.66355672109073e-05	7.81194000310232e-05
pos_2411	1.98373909264664e-05	2.9936141154856e-05	2.43007499445076e-05	2.31684338613619e-05	1.72474043849342e-05	2.16457810227971e-05	2.06179067568542e-05	3.03049357021501e-05	2.47135316597702e-05	2.25649187508779e-05	2.4982428830539e-05	2.40903830548644e-05
pos_2412	8.36034418547715e-05	1.49647892874268e-05	1.68133169421209e-05	9.1696357000602e-06	5.32685663320589e-05	4.62995138495669e-05	4.13263349391777e-05	3.0599681297352e-05	2.15551949969199e-05	2.84942925204119e-05	3.36344785305833e-05	2.91249392596495e-05
pos_2413	3.28399889458844e-07	9.48620136244056e-07	3.55554902916474e-07	9.27545345695235e-08	5.47456611866807e-07	4.55980551108682e-07	4.04529890790192e-07	8.24978903659588e-07	3.08458224751874e-07	7.91101751457911e-07	9.50465432834025e-07	6.25057307880283e-07
pos_2414	4.61441479038178e-06	9.71816038277922e-06	2.16790563417465e-06	6.17231960452608e-06	7.52966451250694e-06	4.05943893852208e-06	5.21375200513414e-06	3.21339948673331e-06	7.38307397751444e-06	6.6165753117257e-06	3.22543371693969e-06	4.237908433804e-06
pos_2415	7.07718865316573e-06	5.10566261535506e-06	1.63924300263969e-06	2.748594046883e-06	5.7431712556681e-06	4.59965310127439e-06	4.42091039154591e-06	3.76633086883453e-06	2.86963864900982e-06	4.17830831295956e-06	4.54801690791791e-06	3.26566947620857e-06
pos_2416	6.25859549010847e-06	0	7.79459827912168e-07	6.03243766281136e-07	3.42889188946298e-06	2.83591669939626e-06	3.25520687532569e-06	1.76385467177361e-06	1.13320316424919e-06	1.4792734889386e-06	2.7792392174194e-06	1.82580186988464e-06
pos_2417	0.00128748432436443	0.000708915314438539	0.000668760828074267	0.000566656004453609	0.000649980817113767	0.000702524103824013	0.000727590317560905	0.000702559202184105	0.000690474507631154	0.000660152258322872	0.000717017688463927	0.000670554452847568
pos_2419	0.00158734542015543	0.00193753642792667	0.00160041954786175	0.00164832633525209	0.00138197526511277	0.00173111324402182	0.00176778067393635	0.00172059398214526	0.00182698053030561	0.001730480901923	0.00185052111208561	0.00152945823461664
pos_242	5.34829926283691e-05	0.000109362402785721	5.81909013691973e-05	4.58607586560228e-05	2.94429112628529e-05	6.16058516606609e-05	6.03709374451336e-05	3.70312166098778e-05	8.44789337788343e-05	7.91524511483741e-05	6.38690192055106e-05	2.6487624640517e-05
pos_2420	0	1.08131334131202e-06	2.30734425740459e-06	4.48829355736841e-06	9.77260329314577e-06	3.8062810071973e-06	6.47852893478406e-05	4.07154150923019e-05	8.69662861344325e-06	8.4983775077695e-07	2.65402726392721e-05	1.02486609514875e-05
pos_2422	2.95903138831715e-05	2.06694889342525e-05	2.1731514321488e-05	1.831990667644e-05	2.01485194598694e-05	2.03710931770755e-05	2.12000752205269e-05	2.45460785660811e-05	1.78474280027175e-05	2.11184711414607e-05	1.91268046065604e-05	1.91512191365454e-05
pos_2423	0.000292200051505082	0.000412994932838689	0.00034750460415048	0.000326861564277756	0.000236960737922245	0.000338319660803282	0.000422552351438772	0.000379978645912324	0.000517574250566844	0.000325550093266297	0.00035628388496056	0.000322614898165514
pos_2424	0.00022200824454767	0.000110032272093294	0.000130773360959771	0.000396919085982993	0	0.000166388811034595	1.46853211373573e-06	7.67475489074302e-05	3.89496765928934e-05	1.93946737512001e-05	4.81758053308387e-05	0.000184771027842307
pos_2425	3.28675311739543e-07	1.66192398421635e-07	3.48220343075852e-07	3.91010887627141e-08	5.44665999767249e-07	0	3.57621282943055e-08	1.50655070360162e-07	1.53356041602607e-08	3.41898904379757e-07	5.97413914234528e-09	5.07913404682787e-07
pos_2426	0.000242829984545169	0.00023269492689175	0.000244249711606093	0.000161557717433389	0.000199455057859338	0.000195352861334368	9.75740022819709e-05	0.000266954239850292	6.37148947471215e-05	0.000164492805325821	0.00021388811127094	0.000533589008139883
pos_2427	1.92845299942563e-06	5.38033105663223e-07	8.64686329255335e-07	6.08702879058604e-07	2.51744584893638e-05	1.32404498512364e-06	7.22048952819024e-07	2.01496400315626e-05	8.82143661173754e-07	6.01592207808692e-07	1.10580281843496e-05	5.93259587493638e-05
pos_2428	0.00027214336625764	0.00029299043374777	0.000371652551359969	0.000185080990828676	0.000249325528619522	0.000278800024275103	0.000184490260103581	0.000255268544428027	0.000209093480443328	0.000328340014645593	0.00028211862711226	0.000295460885520611
pos_2429	0.000127384523885907	9.14786367910374e-05	9.37807064434116e-05	0.000108290187905119	8.573149633607e-05	0.000100156369176581	0.000115390414181589	0.000110353808507772	9.68139760043642e-05	9.28294856983599e-05	0.000103361501684007	9.79315751963975e-05
pos_243	0.000485462565869364	0.000566610455487053	0.00134564403757729	0.00090789562621235	0.000526413541976121	0.000740982643095331	0.000688930415175148	0.000856388102264118	0.000543053188925919	0.000825520276984083	0.000798596003332935	0.00115122667359338
pos_2430	0.000504104238632527	0.000372769037970874	0.000238431267183373	0.000188354129214614	0.000198822065909414	0.000232848176704314	0.000180289040926048	0.000179008919533856	0.000198875361693921	0.000159397941345368	0.000166044133404793	0.000165594659383224
pos_2431	5.2767107940808e-05	6.94694110907714e-05	0.000101111108934104	7.92590644583323e-05	8.45792166864327e-05	7.4135139069021e-05	6.28436348839556e-05	6.46767133474121e-05	7.6446559373054e-05	7.38590317512617e-05	6.59754402953455e-05	7.80663474491479e-05
pos_2432	0.000439531281894513	0.000189991539408382	0.00018032460907419	0.000178896002123759	0.000293803864582384	0.000310382272199809	0.000316773933116171	0.000260575966779448	0.000233558241288715	0.000268154507042323	0.000256051966820447	0.000259849192370962
pos_2433	4.62909732811988e-06	7.43212584228288e-06	5.64218467521365e-06	5.92086018817476e-06	5.27535285887455e-06	5.9949464069384e-06	4.46683529449396e-06	6.45591685156147e-06	6.82248518420545e-06	5.72971867168189e-06	5.64158472225204e-06	5.68710959147528e-06
pos_2434	2.71138878855124e-05	5.67058722166829e-05	2.27356827026058e-05	2.94871489370752e-05	4.26798169517287e-05	3.20893354660049e-05	2.23664511037802e-05	2.26580289223531e-05	4.80849035711413e-05	3.58333620305126e-05	3.19609740910686e-05	3.4890662282645e-05
pos_2435	2.24753427404525e-05	2.724324835939e-05	2.35019948035419e-05	2.51053436148455e-05	2.17194262482223e-05	2.47849335268606e-05	2.32574889264542e-05	2.44098991645716e-05	2.75928390533056e-05	2.33391757554535e-05	2.59907533166469e-05	2.72334529406759e-05
pos_2436	0	1.26860221211936e-05	0	1.80703206484355e-08	1.52792520189029e-10	4.94344974393575e-06	0	3.07564538132463e-09	0	6.27285690256681e-09	4.67646118804161e-12	0
pos_2437	0.00116516136008227	0.000627959449355881	0.000496081920918085	0.00050464108761012	0.00090745130390866	0.000849398183264967	0.000929793017013598	0.000709517997237221	0.00059871126169202	0.000796568041660228	0.000736057088055064	0.000687420297946113
pos_2438	0.00380471028414881	0.00492283167566553	0.00486115766099175	0.00441955998505312	0.00340357954066029	0.00436640792312695	0.00397383545775824	0.00429429283609375	0.0045545030794792	0.00423000617180833	0.0040862250742413	0.0039183068194884
pos_2439	8.47121080014638e-05	0.000105976920491846	0.000110578813157716	8.96557274813029e-05	7.03242646261179e-05	8.98636570565857e-05	7.87866610836459e-05	8.24613933656935e-05	9.45934343931497e-05	7.33464241059544e-05	8.91116518280092e-05	8.52389659685712e-05
pos_2443	2.44408778186996e-05	2.05168165532044e-06	7.3968280165898e-06	1.78431209904984e-05	5.77495176343126e-07	9.6676997630357e-06	6.69910442769162e-06	2.13529490795324e-05	1.1527392858706e-06	1.18579101646655e-06	1.35313722167544e-05	4.17823167735399e-05
pos_2444	0.000702048694553241	0.000709277297197037	0.000552428079649909	0.000572350889728526	0.000701021663054444	0.000680155807418786	0.000580677868536607	0.000602275608674815	0.000648047230644676	0.00066449173602273	0.000633956949505906	0.000616911789121983
pos_2445	4.25899969776236e-05	5.41924926261131e-05	4.97132202514867e-05	3.02513447887427e-05	3.75950905940302e-05	4.62191461257939e-05	5.07637341791398e-05	4.34302161155473e-05	4.15624507577994e-05	3.47999428610525e-05	4.35195807477189e-05	6.95154738090095e-05
pos_2447	2.31809863394626e-05	1.68118526066031e-05	2.16875307192583e-05	2.66690191780064e-05	2.15490000989338e-05	2.48220411469834e-05	4.66765717519064e-05	2.77757692397742e-05	1.45283036969128e-05	2.93480915364013e-05	2.92378240877724e-05	2.47614876343263e-05
pos_2448	2.10566181780601e-06	2.81812203614476e-06	2.64541593276773e-06	7.01353572411076e-06	2.31940270672947e-06	6.37512888430624e-06	5.42534175502752e-06	6.05845625924512e-06	6.13637922698417e-06	9.81371104127437e-06	7.03885312964125e-06	5.09400111598504e-06
pos_245	0.00078989775921188	0.000826504221973486	0.00125749667321076	0.00166492443030804	0.00167938617763971	0.00119280137596291	0.00141058201921447	0.00144915112949915	0.00135303550472736	0.00108997620293824	0.00121771229804525	0.000997809933797416
pos_2450	0.0001903564092994	0.000261260359643923	0.00017262856897534	0.000220554410481346	0.000231559222365111	0.000216735483057882	0.000236308669348806	0.000230651096334408	0.000203581103874919	0.000252121753337559	0.000225774980237443	0.000237437605647349
pos_2451	1.34181463511195e-05	7.2967604328533e-06	1.38751179762921e-06	2.65794734131898e-06	5.30726378434057e-06	3.64284635939445e-06	2.56442465866907e-06	1.53936094980424e-06	6.32206268464368e-06	3.17620500695039e-06	2.1910626903825e-08	2.17972924650479e-06
pos_2452	5.95479017811488e-05	1.16823883827063e-05	1.14208114410881e-06	2.65057029695509e-06	2.12781192678533e-05	1.03895390670114e-05	1.65711667301303e-06	5.01753910285891e-07	8.8516445590414e-07	4.96438049610751e-06	9.97357002489492e-07	3.76100295139489e-07
pos_2454	0.000337905760034986	0.000317987633483106	0.000152987131161874	0.000441004775179913	4.98267537063989e-05	0.000254553533159748	0.000321546524584577	0.000255237043287465	5.63203726639883e-05	0.000417594055088122	0.00025116559695426	0.000184577942786173
pos_2455	0.000200732850001168	8.28561771527811e-05	7.71109366071558e-05	8.32998119445091e-05	9.70740324886366e-05	0.000103945092730392	0.000122387542864416	0.000105710767927996	7.99018309864348e-05	9.42505812380809e-05	0.00010383978130272	0.000102320329439656
pos_2458	1.43414878794522e-07	4.69965320083898e-07	5.66949657327768e-08	3.62063415374496e-05	3.38637408416942e-09	2.79805381098318e-06	0	7.5666550590198e-08	5.33264494213015e-08	3.49791617601314e-08	1.08360520945546e-07	7.94386805919932e-09
pos_2459	0.000287552783881547	0.000141526420758727	0.000129493608833978	0.000121579057384733	0.000146447853932501	0.000143165779800958	0.000145989171933206	0.000152062666177559	0.00014328367142036	0.000135285584246468	0.000135073176667039	0.000134864757929873
pos_246	0.000417785095076963	0.000444537071219797	0.000236543234290743	9.14025383251152e-05	0.000528150742271857	0.000399798694383201	0.00012030013051234	0.000198268486444855	0.000267396618279624	0.00011414169864931	0.000204076090246773	0.000333685096021293
pos_2461	8.79419200681525e-05	6.01422363386559e-05	5.96240067770599e-05	5.22469227240212e-05	4.39011433353771e-05	5.76621498332308e-05	5.47672378241363e-05	6.83813827449343e-05	5.49796190916125e-05	5.99602725398654e-05	5.34146923873687e-05	5.91969189937421e-05
pos_2463	1.62355721941313e-05	2.15709364261615e-05	2.30000771529874e-05	1.9278150353792e-05	1.59572856815974e-05	1.79573335869918e-05	1.86170726805081e-05	2.00984297787559e-05	1.81264812400351e-05	1.8475269088663e-05	1.60418037414261e-05	2.00386722930214e-05
pos_2464	0.000982819054100846	0.00105979945765721	0.000987437815589617	0.000955997561850481	0.000851432300892654	0.000945717597517421	0.000890083367833227	0.000964448241930506	0.00108211290470771	0.000882466434842218	0.000964319843731948	0.000942849534956141
pos_2465	0.00011965603312769	0.000140355272809682	0.000127692064280408	0.000127086626960497	0.000106535958651109	0.00011475825813913	0.000115624298250676	0.000122823953966033	0.000121090357354994	0.000125754275392634	0.000119873955989885	0.000120524367447054
pos_2466	0.000212310508826832	0.000210718920362896	0.000168489045334057	0.000215680487667553	0.000242740191313674	0.000205848890864187	0.000229641841845906	0.000196708029231623	0.000239049303999205	0.000223959235262587	0.00021593824573392	0.000159656504026834
pos_2469	0.000166607106658045	1.12302425206619e-05	1.31312111964694e-05	1.00442097790371e-05	8.13593033053848e-05	6.86912851220908e-05	6.32076083348043e-05	5.28297265421099e-05	2.05198260776519e-05	4.01747451175141e-05	4.72941896952058e-05	3.9028138720378e-05
pos_247	0.000110393560096272	3.84258981134582e-05	0.000356614623397224	0.000929139152764679	0.000116660571391675	0.000313100160985077	5.11982727006365e-05	0.000608552789835729	3.07222483217532e-05	4.67308447352022e-05	0.000421200169206038	0.00143711016972093
pos_2470	2.4253872399052e-06	0	0	0	3.6549941466311e-07	3.22793957149293e-07	1.06046668826873e-06	2.39356216464499e-07	0	0	2.63706613226206e-07	0
pos_2473	0.000221942782090166	0.000340967724994265	0.000153560811252256	0.000177458840675257	0.000277289839003368	0.000233943293987755	0.000215526760875793	0.000187677229954768	0.000306163437746986	0.000178408840150453	0.000209929381415277	0.000168784113511587
pos_2474	3.10128240225659e-05	2.96452726661854e-05	4.59104414086286e-05	4.31589335817736e-05	4.87262225780163e-05	4.28657173126743e-05	3.97209988399675e-05	3.8176809907322e-05	4.55668101971666e-05	3.97079570285442e-05	4.04051871860272e-05	4.18709844900889e-05
pos_2477	0.00014569153581729	3.50872149892967e-05	3.64804255094643e-05	2.78603779988715e-05	8.20475324509619e-05	7.98933164677473e-05	7.7714831546005e-05	6.1682536751159e-05	4.55326579973453e-05	5.8223934837991e-05	6.15119519440773e-05	5.54674481970003e-05
pos_2478	2.51676539887598e-05	1.96134638245471e-06	4.14707769081668e-06	1.95911026239566e-06	1.4203199234513e-05	9.65907996878074e-06	1.11180609866394e-05	4.81081573084345e-06	4.57636555733242e-06	4.23815531604159e-06	6.2730938274898e-06	4.19533308044137e-06
pos_2479	2.46472428247456e-07	1.80307037102888e-06	1.37321239503023e-06	4.03628120176365e-06	6.89545813656618e-07	2.70719988180865e-06	1.43565575719275e-06	2.33867252316053e-06	2.66671178658334e-06	1.24553458857329e-06	1.57768639081023e-06	2.32739945305157e-06
pos_248	0.0105177725409358	0.016733406022194	0.00854221066703499	0.0143663863773992	0.013387423544099	0.0121915274879058	0.012745271654071	0.0108057441430979	0.0151789518122954	0.0125244362121346	0.0122617980920402	0.00820294709589478
pos_2480	1.87980030276452e-05	6.28065889756083e-06	3.61878785198666e-06	0	2.75253011050685e-06	3.58959796033381e-06	6.94858583452415e-06	0	4.34526861826475e-06	1.14960229550314e-06	2.08162950726451e-06	8.25922817114535e-07
pos_2481	3.08139700162343e-05	3.3609181910169e-05	2.61650086157998e-05	2.70710028292846e-05	2.96099164964361e-05	2.86824350475611e-05	4.20555534145686e-05	3.95303491622409e-05	2.01504311599943e-05	4.10908617044075e-05	3.78924211542901e-05	4.34559610668537e-05
pos_2482	3.53186567160188e-06	5.04701545359071e-06	5.12188724210015e-06	2.45501564951924e-06	4.48969499002613e-06	3.50657546396496e-06	5.72494201785312e-06	5.48319817318222e-06	4.55349934694708e-06	5.94951286616722e-06	5.64773775873412e-06	5.61722742569338e-06
pos_2483	0.000186181270303378	0.000236054602394262	0.000208922960767784	0.0002067005552441	0.000165855656377426	0.000201753373444296	0.000215607603250618	0.000204281756533901	0.000252231806811226	0.000197364639914754	0.000211501981467008	0.000191931058058424
pos_2484	0.000101223314700819	0.000104792486396773	7.96633526369734e-05	0.000143983457438949	0.000125169101245074	0.000120013007346834	7.10039641302654e-05	9.16141653293204e-05	0.000236149254164603	0.000115881371332141	0.000134817133448307	0.000136834360375849
pos_2485	4.03979117958818e-05	1.50916352474123e-05	1.50488969004533e-05	1.77447071273852e-05	2.39113016903609e-05	2.15954086571908e-05	3.19845291618804e-05	2.10649601140344e-05	1.76142657016657e-05	1.88868284936359e-05	2.14732165506957e-05	1.89380450049548e-05
pos_2487	0	0	3.7070553323935e-07	0	5.50079271474477e-05	0	4.2772083818159e-07	0	0	0	0	0
pos_2489	5.19472041063166e-05	5.78064296333908e-05	7.38099588744685e-05	3.37345697137391e-05	9.93609130563438e-05	6.36382801682552e-05	2.81691083005288e-05	3.97670132466415e-05	4.06229531882351e-05	0.000190239810809849	7.18706418208083e-05	5.47776101432955e-05
pos_249	0.000126113635219666	6.54275216599904e-05	4.85418462552588e-05	4.83188232344704e-05	8.14425018552405e-05	7.58179502386204e-05	7.6253665402619e-05	6.58412736866386e-05	5.96017569298189e-05	6.13263117394739e-05	6.48099166669467e-05	6.02772172134717e-05
pos_2491	5.22863357853225e-05	4.71520089551599e-05	2.67894848385891e-05	3.45682925051863e-05	4.4232645644285e-05	4.15203913003371e-05	3.70214831998335e-05	3.15138417621978e-05	3.2890601084393e-05	3.38238994927004e-05	3.29040442038209e-05	3.1340065180099e-05
pos_2492	8.30399942172302e-06	7.509231405537e-06	7.251462622139e-06	6.39376226894116e-06	7.65843198885685e-06	7.89084668205486e-06	6.84328051917302e-06	7.27222470573264e-06	9.43826526527505e-06	6.45825478069312e-06	7.31932840276376e-06	6.75340594124197e-06
pos_2493	1.05440756427274e-05	1.80609903590885e-05	1.11559049112591e-05	8.39002859034394e-06	1.26146774558189e-05	1.05510332989713e-05	1.90036239507784e-05	1.64014764301374e-05	9.96648958594254e-06	1.0717121959238e-05	1.5293032730623e-05	1.27297829222479e-05
pos_2494	2.41332183329903e-05	2.09793840887961e-05	2.04008651906412e-05	1.65186487439353e-05	2.4002892706121e-05	1.99603222207551e-05	2.15236690008745e-05	2.10762014906803e-05	1.81499821033647e-05	2.34173401882721e-05	1.90408093247072e-05	2.44625356758918e-05
pos_2495	2.11095426557735e-06	1.3766368814109e-05	1.78476470395949e-07	9.39678934228033e-06	7.45585448147292e-06	4.6946945806039e-06	2.7454878033119e-06	2.18065286386368e-06	2.7429923704692e-05	3.59476089549864e-06	7.57752887583572e-06	1.71936779705604e-06
pos_2497	4.1867302898161e-06	6.60732270084177e-06	2.24625489163179e-07	3.63505769332061e-08	6.82196906146685e-06	4.2238537513956e-06	2.11359125008737e-06	0	6.7194812060049e-05	0	1.85404500249452e-05	2.43091955575473e-09
pos_2498	0.000232258314081475	0.000372232155043399	0.000250593308988378	0.000240428581855567	0.00029360610366939	0.000279278719481049	0.000286145467215585	0.000257185692497049	0.000283853347812748	0.000361889541850605	0.000263783138061454	0.00021714213947047
pos_2499	0.000312483033766758	0.000397872306414143	0.000339457723743958	0.000357944318966762	0.000276503780643919	0.000322499772584936	0.000290965921287374	0.000331266816421276	0.000355925571594243	0.000294759638685652	0.000330668050245447	0.000344340369753164
pos_25	0.000153990941112849	0.000177603040331368	8.13164042610102e-05	7.80320239001556e-05	9.46050624215945e-05	7.73299782856646e-05	7.0496500677293e-05	7.66374352340859e-05	9.62917279386766e-05	9.14360375651152e-05	8.4701327132151e-05	7.27644416131749e-05
pos_250	0.000431408726313067	0.000567848561544843	0.000430881727150147	0.000387675845360868	0.000401890305966086	0.000475826762061653	0.000369218779338367	0.000495802326308361	0.000443361631769962	0.000321566677038588	0.000371145681184238	0.000766899339761446
pos_2506	0.000337313028391849	0.000252083173296131	0.000230227047743043	0.000219148106023012	0.000217334016130527	0.000256828316860786	0.000249758156314654	0.000249777180330849	0.000252828468021193	0.000221440599107128	0.000241777059431734	0.000238818042334455
pos_2507	1.07040577431824e-05	9.81265224900472e-06	4.31482715553699e-05	2.03860826924467e-05	9.90143749173278e-06	1.80387216644884e-05	2.83215661437649e-05	5.29045259413594e-05	1.3086066011738e-05	1.45255635755154e-05	4.13173861473298e-05	8.01565551290706e-05
pos_2509	0	1.31441136713916e-06	1.1660647479767e-05	0	1.17985972032071e-07	2.02927189226777e-06	0	1.01449383211653e-05	1.58074185741961e-05	2.01313021091912e-07	5.87336288597306e-06	2.76419978001768e-06
pos_251	4.38020779967484e-05	0.000194417420818586	7.75198606467813e-05	3.26943037931574e-05	5.25596433511269e-05	6.22996754895094e-05	3.00914817265459e-05	4.57501553768693e-05	2.46918801155712e-05	0.000100732027946334	6.1379365747893e-05	0.000102497022865116
pos_2510	8.23975298715076e-06	9.55382203048644e-06	4.69934630837858e-06	9.1673920108783e-06	7.65521709442052e-06	6.92462708797155e-06	7.07752245910167e-06	6.6595464768087e-06	6.91881323721833e-06	8.61894066940986e-06	7.25193969250128e-06	6.16464015352265e-06
pos_2511	0.000227993984861769	0.00061792108386283	0.000293727289161461	0.000222456865584201	0.000447491853975806	0.000319779874241041	0.000289808992953938	0.000275501906959151	0.000233442056611426	0.000406125567535773	0.00029575529955424	0.000271050327783896
pos_2512	0.000199237064660531	0.000280649472934069	0.000257676324820858	0.000218916522878535	0.000194944331401026	0.000239722443217579	0.000200764208378094	0.000233915616280884	0.000260137115246717	0.000209285114280883	0.000234892528254504	0.000208746131249508
pos_2513	3.36548736988156e-05	2.99552204875407e-05	7.22708867156125e-05	1.78498059127225e-05	2.73643539267595e-05	3.38397000824036e-05	1.62187703909293e-05	2.70533900929533e-05	1.97865357802857e-05	0.000115482236156877	3.37399697811279e-05	4.89483259830906e-05
pos_2514	0.000244770999422418	0.00247932541710712	0.00258973328009714	0.00377111402736185	0.00221942555011873	0.00194476328920662	0.00169753867198032	0.00182595175469721	0.00304495384302324	0.0017710082578687	0.00119299614774424	0.00225582924272357
pos_2515	4.21144503259397e-05	7.42104038588207e-05	2.25859119724252e-05	3.99095548821571e-05	7.87708428446978e-05	5.38814023463355e-05	8.19118726491169e-05	7.34000496134874e-05	5.816947601842e-05	7.43661100668789e-05	7.81928145225747e-05	5.09058969295718e-05
pos_2516	0.000162585138229998	0.00013815369054573	0.000124167302558482	0.000116336510862394	0.000102806063820092	0.000128104804522825	0.000114224372567633	0.000122079528444267	0.000127506053243486	0.00010638036527525	0.000122262602425791	0.000125190756996134
pos_2517	0.000363285470009658	0.000505521149828874	0.000359084173619076	0.000399705208178397	0.000272823077403001	0.000422246737761249	0.000369590521619527	0.000403484172119154	0.000415033808222874	0.000338315649054638	0.000427698187402319	0.000309157305998138
pos_2518	1.35412891230623e-05	1.38573262559768e-05	1.24344524433854e-05	1.4642561805685e-05	6.69738087179705e-05	1.42346074062898e-05	1.2834465334907e-05	1.67960022541207e-05	1.39761779325816e-05	2.16021286513912e-05	1.393065826551e-05	1.49883591183907e-05
pos_2519	1.11936476923638e-05	2.19257289647726e-05	8.09549121895838e-06	1.19802000743558e-05	1.5427162319353e-05	9.87956431828371e-06	1.31782647445316e-05	1.12999681649703e-05	2.17354360253433e-05	8.83049273174512e-06	1.27223426726039e-05	2.17532265209563e-05
pos_252	0.00027426840391063	0.000420158680022191	0.000241274026642376	0.000271078960312446	0.000312176701420862	0.000289577590142251	0.000340785082549709	0.000270176737380963	0.000250765841777579	0.000349793755446594	0.000285398203325568	0.000198224101163184
pos_2520	9.02059401866093e-05	0.000101107004094538	5.54819766167434e-05	6.55434426282851e-05	8.48550006166936e-05	6.31060377744696e-05	7.2598304608989e-05	6.80815725713873e-05	8.49886004454943e-05	6.65967026702587e-05	7.27543908304443e-05	7.72246013690668e-05
pos_2521	1.64792776355478e-05	6.33876359934369e-06	3.09629009138558e-05	2.09730002819536e-05	1.85791942614296e-05	1.80441570775684e-05	9.96515645313579e-06	8.0942112799317e-06	1.88193671268594e-05	2.23641089104321e-05	1.68683011521122e-05	2.00202539589416e-05
pos_2524	8.1039689728586e-06	4.35803791749774e-06	3.41385195450209e-06	2.22742358146156e-06	8.36738141888255e-06	4.41081323965608e-06	1.65875083973825e-06	1.82711656972351e-06	4.60807953809335e-06	2.9524563327241e-06	3.70586314234483e-06	5.55783100423788e-06
pos_2525	5.23567740719502e-06	6.10852455395543e-06	4.77625395537121e-06	6.38941794700283e-06	3.89204884018037e-06	5.67507013199788e-06	6.85183372892717e-06	4.57153834818318e-06	3.43925703170368e-06	5.94576026930914e-06	5.47139150509515e-06	4.34004115015581e-06
pos_2526	1.47818999464143e-06	5.35258470911397e-06	6.0036511793396e-05	0	1.05564961627657e-06	2.16400010018138e-06	0	2.70658361312514e-06	5.93137462020422e-07	6.23798761108606e-06	1.68281891700194e-05	7.79413059431838e-06
pos_2527	0.000105269556080405	0.000118252190014297	0.000114232957662997	9.66782615559802e-05	9.64349481341119e-05	0.000101079850209075	0.000102778392349572	0.000104930746109167	0.000118855616533879	9.85040192554956e-05	0.000107865482330217	0.000101152518996876
pos_2528	0.000128251730232898	0.000163460220814854	0.000160118379341609	0.000133165855758902	8.31364848856954e-05	0.000132570158119979	0.000128310052099191	0.000154664632676384	0.000120247162978059	0.00010181704779579	0.000118759010680975	0.000124073557922427
pos_253	6.50569985508459e-05	3.88531598940386e-05	0.000261833433841192	2.4644626892151e-05	2.31833532572606e-05	7.26799355403682e-05	1.44235102874569e-05	8.49082870116661e-05	1.28435798080013e-05	0.000141154214122962	0.000101945204001838	0.000227717309188201
pos_2530	3.0631211829128e-05	3.10700212699311e-05	1.83444281834334e-05	2.88919121121592e-05	2.9056730140632e-05	2.69474581804323e-05	2.52172050575113e-05	2.38811808205173e-05	1.50493725551229e-05	2.99886893239885e-05	2.59235143364407e-05	1.78948995171464e-05
pos_2531	1.20240455763733e-05	2.05117805805916e-06	3.38125797060265e-05	4.84981382894595e-06	7.49769914856812e-06	8.26871048399801e-05	8.94337764678185e-06	9.13661414860887e-06	2.6070449155582e-05	8.53173557836718e-05	7.74135966907602e-06	6.99644344810066e-06
pos_2532	1.46273394693293e-05	1.95760410676616e-05	1.61107808616947e-05	1.46053726880258e-05	1.63555534556035e-05	1.94497101349195e-05	1.21813983890383e-05	1.52154934589437e-05	1.54681745033204e-05	4.95868157181232e-05	1.52623314717108e-05	2.16189280747004e-05
pos_2534	0.000180652089211543	0.000223946488691023	0.000155709303687548	0.000204017723239879	0.000186344082090371	0.000151361223767612	0.000197633362733642	0.000199205501031399	0.000210371908052917	0.000224232072848342	0.00017452028196234	0.000164147680938831
pos_2535	4.16187359486496e-06	1.18935007515658e-06	1.34922456796113e-05	7.91583230012348e-07	1.34099975753244e-05	2.25545099053081e-06	3.19408506507884e-06	2.22036227574492e-06	1.16134390533405e-06	2.44423567381065e-06	5.16136396216016e-08	1.63480095711742e-05
pos_2536	1.01187003818157e-05	9.44706186968478e-06	8.85671508372007e-06	8.6085044540635e-06	8.35690273363424e-06	8.63465361934171e-06	9.18435635311745e-06	9.34452106953925e-06	9.66152836431683e-06	8.2625262445071e-06	9.05573447350962e-06	8.41293594383881e-06
pos_2538	2.46191408449343e-05	4.13329608806806e-05	3.87468135795868e-05	3.29473173072875e-05	1.64146079183835e-05	2.45405554426215e-05	9.42865630088846e-06	1.68900101350101e-05	3.03055227676533e-05	1.80708437508523e-05	2.42307468119173e-05	1.71922357480036e-05
pos_2539	1.14570829089823e-05	0	0	0	0	5.89959489388373e-05	5.66888737309304e-08	0	0	4.05774414400369e-05	1.36416447250283e-08	0
pos_254	1.07021742746193e-06	0	6.345624467106e-05	8.24636013635903e-05	9.01701222653302e-06	2.9512419235653e-05	0	3.10111667131475e-05	0.000112626046693934	1.23871483839286e-06	4.33946399307031e-05	7.93174828974737e-05
pos_2541	2.96803544198392e-05	3.74311305118157e-05	4.3293856610723e-05	3.20214713430757e-05	2.62182214791165e-05	3.15799992975341e-05	3.59450337178528e-05	3.89333154294411e-05	4.31418394881663e-05	3.47031492655254e-05	3.94323080978663e-05	3.95586378289077e-05
pos_2542	1.09896241895143e-05	1.24904172135582e-05	1.50788954293823e-05	1.1491030725248e-05	2.06594911205591e-05	1.3659416794747e-05	9.21055416265615e-06	1.16977516211864e-05	5.42175174305388e-05	1.7310662488263e-05	2.10696395836396e-05	1.31216448748649e-05
pos_2543	0.000425908069764086	0.000307544283970919	0.00023882159085169	0.000270129421887008	0.000194787366508952	0.000284666560752313	0.000265015086484378	0.0002700742193403	0.000254767642251191	0.000236592966188242	0.000252111463501331	0.000252398241617323
pos_2544	0.000148323213513991	3.49660332603153e-05	3.93837155010981e-05	3.1374432417564e-05	8.8464367229339e-05	8.47518414606377e-05	8.12542723078489e-05	6.41843200765479e-05	4.88983022708435e-05	6.02737511665428e-05	6.40541319796577e-05	5.96495666525213e-05
pos_2545	7.0901747245348e-05	0.000113988381340402	5.8274003546733e-05	0.000102914954388013	8.49918568684619e-05	8.33179292980038e-05	8.47123938047862e-05	6.38980873857014e-05	9.83515233422554e-05	8.20416545504879e-05	8.13422567362128e-05	5.59043564759193e-05
pos_2546	3.17605958139711e-05	5.4707709699493e-05	2.51327582248597e-05	3.07986237126703e-05	3.94481264302595e-05	3.65101538582063e-05	4.38022730484263e-05	3.63002501639507e-05	3.49377863270476e-05	3.54299399954126e-05	3.78080808961867e-05	2.91436034275017e-05
pos_2548	1.58344486374134e-05	2.22679781042675e-05	1.36426991570246e-05	1.44506340881881e-05	1.90294210438755e-05	1.60938419923443e-05	1.3656250866892e-05	1.46743004999234e-05	1.84986983085626e-05	1.11055372136484e-05	1.50693653487401e-05	1.18890859049669e-05
pos_2549	0.00022861841819666	0.000458789887513757	0.000396113844600145	0.0003305743860551	0.000394485865773998	0.000314353686457029	0.000388174442661521	0.000459502800579658	0.000477859980334896	0.000327290413048308	0.000420739989948233	0.000301249265514088
pos_255	0.000239382087983262	0.000160193169994184	0.000146324005221377	0.00031002789447295	0.00018684964357056	0.000225769125169077	0.000250630526690715	0.000231045608656179	0.000255206969215497	0.000248825520324775	0.000257073735118376	0.000255256236511819
pos_2552	6.62907313017105e-06	4.18934472843828e-06	3.56054782944348e-06	1.96512509045179e-05	1.00233837653847e-06	7.1330895070776e-06	1.09206012867093e-05	7.42232906160522e-06	9.95386046704359e-07	1.18707092897763e-05	7.32391900096052e-06	6.7117930139059e-06
pos_2553	0.00012508407240431	3.71708192026817e-05	7.67347546973075e-06	5.56025126501246e-05	9.12196120175171e-06	3.79885656032865e-05	7.75401332935037e-06	8.16289855051776e-06	1.86609852290504e-05	0.000121805741897046	2.84979434409809e-05	1.17325864674505e-05
pos_2554	2.68822581672191e-06	3.07997062670546e-06	1.44278422192959e-06	1.33047655697517e-06	2.88703141514821e-06	1.80360182017325e-06	6.57422552541767e-06	3.14348888086015e-06	3.37934566747709e-06	4.18133554812681e-06	3.26088871288975e-06	2.48113420115545e-06
pos_2555	1.60076463371593e-05	1.38041446717545e-05	9.66885216738173e-06	8.864010439617e-06	1.9985645919524e-05	1.37390957244672e-05	1.33501343280909e-05	1.29753200811514e-05	1.40296142056044e-05	1.31315404869492e-05	1.0657653659296e-05	1.79137506639091e-05
pos_2556	0.000158029336247826	0.000190629821561473	0.000343972929746201	7.30191321841535e-05	0.000177463043482129	0.000243488389945332	5.09562698142763e-05	0.000157029697172116	8.33617521256331e-05	0.000393697148849041	0.000217798543384647	0.000282236612994075
pos_2557	0.00828374034143372	0.00940077607693951	0.00709174357539526	0.00550412646275679	0.00470221897267896	0.0105907136480411	0.00614769060086394	0.0102316643889816	0.00596652649767274	0.00935830414992716	0.0104424754406445	0.00848451079544205
pos_2559	0.000544727638976925	0.000380128300014322	0.00031578320501969	0.000359389371107796	0.000313142366106549	0.000398680962692749	0.000380705457793481	0.000367782031814779	0.000364558027011601	0.00033378698715755	0.000352166151869275	0.000368346070772485
pos_256	1.48042248295362e-06	1.51214180526283e-06	2.12305613131637e-06	1.09108728293658e-06	6.72113644228453e-06	2.3799048065479e-06	2.28514397779588e-06	8.22056854187029e-06	9.20910508878147e-07	9.60204983920656e-06	6.35323922153918e-06	2.15977952246844e-05
pos_2560	3.35700459685172e-06	8.53022028763727e-06	3.18313477722567e-06	1.94869876836947e-06	1.16357941017589e-06	4.29079676881982e-06	0	0	0	1.59622090187457e-06	1.99472937528883e-06	1.09662460070409e-06
pos_2561	2.33541365243932e-05	2.9603250650573e-05	7.79964993748026e-06	4.83029178687148e-06	6.86434976181779e-06	5.84352012688452e-06	2.81665993863711e-06	9.44305659041683e-06	9.47812489132107e-06	3.08452865640491e-06	5.73223919856015e-06	5.55510407325477e-06
pos_2562	3.01503526850557e-05	2.63019102952351e-06	4.50724971753832e-06	1.73273849522917e-06	1.1895460328623e-05	9.34344439074327e-06	8.01062375118181e-06	5.29889041358385e-06	2.82509120993476e-06	5.00528160083114e-06	3.74368251008043e-06	2.80739337989001e-06
pos_2563	1.89204843123998e-05	8.22772547189543e-07	4.77834601208687e-07	0	5.26912732179718e-06	1.97668920760849e-06	3.45236659756525e-06	2.86207344892826e-06	0	9.00837741176844e-07	8.14963148010191e-07	2.62027643369006e-06
pos_2564	4.14677943783303e-05	2.23426277468754e-06	7.21659339893269e-06	4.69474357072721e-06	2.36253759964185e-05	1.88244886856501e-05	1.73427031066853e-05	1.32396692612446e-05	7.49329937851211e-06	1.08983115699546e-05	1.37971607032426e-05	1.00853646729404e-05
pos_2565	1.21011420215864e-05	1.28082555267511e-05	0	9.00809993142853e-06	1.31091222232293e-05	1.01549231861361e-05	0	0	0	8.84953248856816e-06	2.12273876301124e-06	1.8192695533641e-07
pos_2566	2.16327684462331e-05	1.1566600584301e-05	7.62135251938309e-06	8.0340160987918e-06	1.62216353775046e-05	1.16377918214777e-05	1.57360248881672e-05	1.17859386867249e-05	1.25684281971292e-05	9.49337161779851e-06	1.20093839524664e-05	1.59737457764242e-05
pos_2567	1.86916581753196e-05	2.32391509617441e-05	2.0922219918081e-05	3.89418165062847e-05	1.52492697840683e-05	1.79144695337293e-05	3.63953661442669e-05	2.77587205549202e-05	3.09339164059838e-05	1.79777513644513e-05	2.61121431279403e-05	1.79330441737817e-05
pos_2568	0.000242644339159757	0.000217729606293515	2.05332612217408e-07	6.66342777296451e-05	0.000266394159727697	0.000129364256904878	2.05633266207401e-06	2.92008604518797e-07	2.85150101923268e-06	8.26105194462058e-05	3.9964472938893e-06	2.82703405727531e-06
pos_257	4.2395225904706e-06	1.58282101127207e-05	1.06017582581873e-05	2.05090651927647e-05	3.19795775706057e-05	1.06560919918051e-05	2.13382183355026e-05	1.79828786464474e-05	5.51637964125135e-05	1.43070155606541e-05	2.35569148285465e-05	1.8185514065257e-05
pos_2571	0.000241285975752402	5.52560565111994e-05	6.13775493407415e-05	5.15384566862644e-05	0.00013919985804936	0.000137877460569218	0.000128666059974346	0.000114364827351696	7.84329881702453e-05	9.18116954846874e-05	9.80360886618645e-05	9.29234040390045e-05
pos_2572	1.67199395185248e-06	3.23591535638792e-06	1.34494236562553e-05	2.23598351993206e-06	9.1018936700864e-07	5.03579668445133e-06	9.59355729285779e-06	9.36535116964775e-06	2.05041272615849e-06	1.26169219431028e-06	6.3394542439504e-06	9.71883077543858e-06
pos_2573	0.000240107505502013	0.000273001645860926	0.000236893346022484	0.000234796892084767	0.00027484450852713	0.000224998612606628	0.000316783712279081	0.000290676393569102	0.000224774427234256	0.000284860851857344	0.000253843559755103	0.000351353606834885
pos_2575	6.40881556995137e-06	3.33793911522889e-06	8.26811761841625e-06	2.04441317756713e-05	1.33628300733371e-05	7.67958437692962e-06	8.57144318267568e-06	1.28808527191101e-05	1.21989066855124e-05	9.00341273344152e-06	1.07311110707339e-05	2.67481697662334e-05
pos_2576	8.9562602564984e-05	0.000135434771791295	0.000158393851090148	0.00015218509141268	0.000116675387062521	0.000133493503493901	0.000157592764054044	0.000189344946287217	0.00014126070687177	0.000131526325457493	0.000149432589770252	0.000160410768689247
pos_2577	4.22657387177802e-05	5.30164073750522e-05	5.02323101517479e-05	7.67353948194543e-05	3.72750874068235e-05	4.7806716055611e-05	4.76165441702343e-05	4.56021193952734e-05	2.72711991769228e-05	4.55431513286759e-05	3.97119466365803e-05	4.53444969119272e-05
pos_2578	8.74660428373685e-06	1.04490570919532e-05	1.79953957107142e-05	9.02075376518089e-06	1.1696688939659e-05	1.46388391989801e-05	8.91864774664675e-06	1.23401231386614e-05	1.62364342583346e-05	1.36991625544846e-05	1.47790286592089e-05	1.26202814232952e-05
pos_2579	5.74641050700464e-06	8.46916905963131e-06	1.08337701199529e-05	1.20484369379059e-05	1.36484107841492e-05	1.4277946283185e-05	1.61551539593263e-05	1.12408932008659e-05	1.8873088992216e-05	1.38755247028298e-05	1.44146797825502e-05	9.95623623692577e-06
pos_258	3.40895282706212e-05	4.77869516941917e-05	1.96730377013266e-05	4.22501338758585e-05	2.97654837260369e-05	3.30612540144046e-05	3.38766085549492e-05	2.86220597296157e-05	4.23561411428939e-05	4.89761823384719e-05	3.43797914858613e-05	2.26532765230405e-05
pos_2580	0.000792556103695019	0.00081356482012843	0.00050827945159905	0.000411277831077791	0.000488710409378786	0.000610924524875745	0.000465012868969362	0.000571043757874537	0.000504541631169951	0.000506482304154964	0.000562887763130639	0.000784567463026934
pos_2581	5.11238598427932e-06	5.56354859170235e-06	4.56681867217786e-06	4.34785367806144e-06	5.512610156894e-06	5.24000111923025e-06	5.54061509835234e-06	5.49397173657182e-06	4.61758259017143e-06	5.50380815822222e-06	4.30363435184566e-06	4.79909884348406e-06
pos_2582	2.25941324372133e-05	5.99744902977763e-06	4.72419668646686e-06	3.85706133474216e-06	1.32630688384619e-05	1.19445659161415e-05	1.36235232455528e-05	8.95449332700837e-06	6.52604822297348e-06	1.133635303402e-05	7.17726619342342e-06	8.28586861325428e-06
pos_2583	6.80954248026754e-05	9.64659412498125e-05	5.57806879067264e-05	6.51210688404687e-05	8.43868562234508e-05	6.41069505218919e-05	5.972672590761e-05	6.00287896782271e-05	7.51261437289625e-05	5.21795513963824e-05	6.39777471087447e-05	6.799520686661e-05
pos_2584	0.000160764720996139	0.000205709198019299	0.00010609283590226	0.000144384026658091	0.000125737579213678	0.000122135468002903	0.000161267332460841	0.000132863501587275	9.06923597699995e-05	0.000192159373397606	0.000142527635536402	0.000121150031300752
pos_2585	0.000166443714974721	7.99073789422112e-05	5.37701216634469e-05	6.69602040710461e-05	0.000102194454473522	0.000107133162876969	9.3410958740943e-05	8.24550612726146e-05	6.34862496627339e-05	8.0200945927218e-05	7.99836441054371e-05	7.22520443827848e-05
pos_2587	8.99753318480094e-05	0.000115657337407928	0.000194040976161546	0.00021206175454169	0.00020274511850803	0.000150834257136382	0.000200881166944013	0.000226628374829862	0.000257801848493885	0.000238965176817526	0.000223440614646888	0.000203841299739229
pos_2588	0.000138361437007321	0.00021138795766799	0.000128301556995495	0.000201685486239539	0.000176418165904124	0.00016104442126008	0.000184660749197027	0.000175407343311839	0.000171566861561433	0.000136133853596129	0.000173680112065264	0.000185247193408686
pos_2589	9.41142854784056e-05	1.52082480562499e-05	1.81207063093703e-05	1.3027442863834e-05	4.87365359187478e-05	4.58530395613078e-05	4.14173342817697e-05	2.79668595324117e-05	2.43657194461659e-05	3.32216898319554e-05	2.62806084618215e-05	2.6921320802051e-05
pos_259	1.74795508773294e-05	2.39357856677179e-05	1.38412274664502e-05	2.06312853572244e-05	1.65337397417784e-05	1.89050555617991e-05	3.11100161243635e-05	2.46069352693525e-05	1.83720843466101e-05	2.29261432781532e-05	2.24199626534121e-05	1.38045949611583e-05
pos_2590	6.71245569889964e-05	4.73590757380254e-06	6.94682829518072e-06	4.34031542746719e-06	2.77517643292907e-05	2.59987312998249e-05	1.82841007697627e-05	1.19670665547861e-05	4.77981668719049e-06	1.09086978465145e-05	1.59059848290462e-05	8.19107472622015e-06
pos_2591	2.26012957598124e-05	7.54206782434312e-06	1.29345317030223e-05	8.87384291884018e-06	1.52688465808484e-05	1.32627086995405e-05	1.73624579953366e-05	1.34109809852893e-05	8.18101966910037e-06	7.62819643636935e-06	1.07521052954862e-05	1.25024947875429e-05
pos_2592	1.08905613159377e-05	1.78145043203552e-05	1.55682755799906e-05	1.80588373438088e-05	1.80278648684339e-05	1.34856063868507e-05	1.77832177966935e-05	1.36296908171829e-05	1.87973231305542e-05	1.40984368053836e-05	1.73329621468878e-05	1.35455963473884e-05
pos_2593	2.50548650661536e-05	2.76165033882918e-05	2.48308283270829e-05	2.43012375418344e-05	2.09931616612332e-05	2.5090682649701e-05	2.18381731628036e-05	2.46415028265626e-05	2.46694664201742e-05	2.63671922219607e-05	2.53590403823299e-05	2.41719326089779e-05
pos_2594	0.000341702404204824	0.000376607880526836	0.000357542411005626	0.000344701595853548	0.000302181126270102	0.000309231027374163	0.000306444523126778	0.000334505670731907	0.000319485006054664	0.000355801565511832	0.000328541048030009	0.000323726722623897
pos_2595	0.000440631711845507	0.00106542532991702	0.000961483506861328	0.000925438981453857	0.000588393598529989	0.000635925489581276	0.000578693197784452	0.000537012454994328	0.000533329611067062	0.000721344077249394	0.000798753770572904	0.000493918491921796
pos_2596	1.41865130030162e-07	0	0	4.11817296911475e-05	0	3.9015460397005e-07	0	0	0	2.29271103492789e-07	0	2.11823103357887e-06
pos_2597	4.8897555979896e-05	2.44615884788046e-05	2.34487850949537e-05	2.34414743308556e-05	2.62102923233104e-05	2.68693904644206e-05	2.39357535859048e-05	2.79243763105828e-05	2.43715309791098e-05	1.90069841155258e-05	2.41281564093107e-05	3.42452555314782e-05
pos_2598	1.00065925609953e-05	0	1.39885106579711e-06	9.78341040225147e-07	7.55312121157693e-07	1.03764683334986e-06	0	8.21107638895384e-07	1.26803010022503e-06	1.56006829390701e-06	7.47095257542791e-07	8.87440422856187e-07
pos_2599	4.88893104233074e-05	5.64254440011774e-05	6.31993308693238e-05	5.48792158419953e-05	5.51813435167576e-05	4.51414247436176e-05	4.47738830434078e-05	5.42227361568071e-05	5.53149622823581e-05	7.39771311398314e-05	4.60187047636781e-05	5.31676180517487e-05
pos_26	8.05601787430062e-05	0.000111854623742039	0.000121965086681268	0.000110911677821122	9.6846366633406e-05	0.00010122605548856	0.000119372582178657	0.000115589724544942	9.88079464156822e-05	0.000112709696430345	0.000111933445819291	0.000111309151659614
pos_260	0.000297408497618493	0.000381431476182294	0.000467838172688707	0.000347717391232166	0.00024822024055482	0.000293324075869217	0.000293863658274156	0.000347588836574223	0.000347924239561906	0.000286012233541594	0.000322178726726634	0.000336743175244021
pos_2601	3.91101563380337e-06	1.65023703491074e-05	8.14748076290553e-06	1.1651497515915e-05	1.04663684851581e-05	6.29712161088246e-06	3.83149556668853e-06	9.47251147881467e-06	8.54964600169767e-06	7.6698307097145e-06	4.01225875486823e-06	5.5006413296803e-06
pos_2602	1.69456105290472e-05	1.29010374122944e-05	1.33232343163086e-05	1.15516882911234e-05	1.81775078629932e-05	1.15326053384553e-05	1.65643369871073e-05	1.4705215869362e-05	1.17776761266574e-05	1.48720728336546e-05	1.18483727387785e-05	1.50204039216527e-05
pos_2603	0.000298273107067563	0.000295330138668931	0.000275950547014698	0.000266287970276373	0.000236362780452809	0.000279052256695013	0.00027212738948041	0.000275914485954569	0.000293468027780569	0.000262202299205358	0.000282462598978459	0.000280902487729047
pos_2604	2.4972644399794e-05	4.23593870366917e-05	2.41388302053765e-05	2.38032480482999e-05	2.78348557399536e-05	2.59047784879948e-05	4.22716321299042e-05	4.02524834423218e-05	2.54201141974624e-05	2.37549413015651e-05	3.55840244315269e-05	3.02119965860262e-05
pos_2605	0.000236124582464488	0.000338140164961007	0.000157929579037224	0.000229552468502753	0.000267408931579528	0.000244173230614755	0.000216746866799229	0.000193078201509399	0.000245477289444679	0.000273902192533796	0.000226131827905009	0.000187912830759202
pos_2606	4.15704365081531e-07	0	3.27640695591403e-06	9.67895148924085e-06	3.25043151951463e-06	0	2.07687407073991e-06	2.99058110554927e-07	4.6946549516038e-06	2.80031235295537e-06	5.57870703759476e-06	6.51152605889781e-06
pos_2607	0.000578857471670631	0.000443168355895264	0.000357259992928781	0.00022015014270156	0.000329474279219508	0.000327417855780569	0.00028696279116321	0.000263218204200946	0.00031727029442554	0.000242329334063514	0.000258323147768887	0.00025035785589854
pos_2608	6.46936117789252e-05	7.42535689743216e-05	7.21217691945652e-05	6.05251733025153e-05	5.88064816886072e-05	6.60135223600918e-05	6.19701249090267e-05	6.37974535003557e-05	7.2929123938605e-05	6.26100298356625e-05	6.60986396296764e-05	6.02842487522772e-05
pos_2609	1.20158697427259e-05	1.7143282184349e-05	2.21806400966383e-05	2.00946276892841e-05	2.07834503200168e-05	1.70086897851291e-05	2.50090864607798e-05	2.25845899699257e-05	1.83860343757798e-05	1.96389377253813e-05	1.94065689153452e-05	3.1253090160902e-05
pos_261	0.000179428379581738	0.000221448282969291	0.000203543861559034	0.000200927589902023	0.000151357822327817	0.000193656651866008	0.000165291098040345	0.000193998993040339	0.000212206881959395	0.000168437466105303	0.000189655114564521	0.000174900372990387
pos_2611	9.60313158748836e-06	1.59753230254369e-05	1.19410600274171e-05	1.04347786745713e-05	9.91200688688158e-06	1.09679915327708e-05	1.50174374383525e-05	1.39927831158471e-05	1.26796570652182e-05	9.55853556600188e-06	1.26007065850005e-05	1.0573245178261e-05
pos_2612	1.61842435318096e-05	1.95244640379494e-05	2.00647174824632e-05	1.72499737067871e-05	1.42298111337889e-05	1.67922491743628e-05	1.48003330599151e-05	1.85665760385837e-05	1.94210599464742e-05	1.50701189464502e-05	1.61477142270422e-05	1.64891487601941e-05
pos_2613	0.000484206959178751	0.000442814039109861	0.000464270687925337	0.000401799420958882	0.000423286368042145	0.00109868783511714	0.000351992217276292	0.00108561381551744	0.000401571655375294	0.00247873489847143	0.00204127355806662	0.000384830040725994
pos_2614	9.05533321730807e-06	8.14008722493443e-06	8.3095380248906e-06	8.08727932991682e-06	7.98905405480313e-06	8.06460971736695e-06	9.35858868770022e-06	9.5924540508493e-06	9.00326591543497e-06	8.86787264993559e-06	8.13915119824859e-06	7.67070718798593e-06
pos_2615	0.000786058950734136	0.000879474229693813	0.000748932358603571	0.000986111154525099	0.0009322604545892	0.00086146303212008	0.000770041063789157	0.000787751771134466	0.00090279930826381	0.000897234618469162	0.000854538228908768	0.000742903590827136
pos_2616	0.00010091059135145	6.93604044477036e-05	5.22373901535393e-05	5.09268930373526e-05	5.06473479145007e-05	6.13558132882948e-05	6.15671414706596e-05	6.33446259764978e-05	5.9589805777903e-05	6.27665577714981e-05	6.27516243531895e-05	6.08820294514038e-05
pos_2617	3.18200673789147e-05	4.52727615446724e-05	4.14433315809752e-05	3.38947121389248e-05	3.02001364459962e-05	3.36427564332278e-05	2.9319912447283e-05	3.40969068361802e-05	4.23184027977601e-05	3.21093365726748e-05	3.30446164171191e-05	3.19116201440629e-05
pos_2618	3.94796039663737e-05	4.60367103498759e-05	0.000115270658030935	9.09911195104772e-06	3.31320328123671e-05	3.85274315819764e-05	8.575384793412e-07	3.03082043374877e-05	2.16336170030226e-06	9.77294304411927e-05	3.34199538101225e-05	7.05686370405747e-05
pos_262	5.29718341543191e-06	1.15089462808637e-05	8.76940486664575e-06	2.42866917309858e-06	6.71890376398743e-06	7.21764851190075e-06	3.70372007221334e-06	5.35850879293618e-06	1.92562980724214e-05	5.52660466888584e-06	8.34414156533331e-06	9.160394007529e-06
pos_2622	0.000301122915944176	0.000334610066031765	5.09358593701699e-05	0.000171108038970938	0.000282023754933637	0.000232323787068686	7.60022149223299e-05	7.21170875134866e-05	0.000146576333712696	0.000184742180379443	0.000110759982737507	6.69713239542355e-05
pos_2623	2.88028209258431e-05	4.18844063703111e-05	7.16193214234321e-05	3.5607667955433e-05	2.10422733063127e-05	4.55713415067171e-05	3.43711433889431e-05	3.74434951532265e-05	4.74269460176737e-05	3.66137216362605e-05	4.50933348634262e-05	3.48417321583212e-05
pos_2624	1.29105223818325e-05	2.21595369282794e-05	1.92394513115872e-05	2.26391325460726e-05	2.04404752701184e-05	1.63053781715853e-05	2.9997695221891e-05	2.70632259402607e-05	2.18241762387119e-05	1.88293238177274e-05	2.60146335953122e-05	5.46515811999137e-05
pos_2625	3.38965178563492e-05	3.35535351822031e-05	1.7336716619337e-05	2.09899332849832e-05	2.10654924259202e-05	1.94186364673103e-05	1.65179104928299e-05	1.7316839467909e-05	3.73341580527283e-05	1.5388421559725e-05	2.32097308119941e-05	3.03795219176845e-05
pos_2626	6.40209351937474e-05	8.36187874880198e-05	9.42598079739901e-05	8.7718050943596e-05	8.95618197792322e-05	7.9381364461897e-05	8.84647790935073e-05	9.74057443504298e-05	8.25405157581504e-05	7.66855181207664e-05	8.36289457659447e-05	0.000100075013333925
pos_2628	0.000990578007489836	0.00153512158798474	0.00111227557314106	0.00156725515392047	0.00160619741823269	0.00134394834851859	0.00161145334779814	0.00105287611824723	0.00169062274177355	0.0011898064156875	0.00118900454026606	0.000710389882104339
pos_2629	0.000106736907964084	9.47978906420778e-05	0.000110981550517934	0.000142592155097802	6.16759768151825e-05	0.000105304642803883	0.000117966865988552	0.000126611130812628	0.000103054366408321	9.52524693081828e-05	0.000122587134942757	9.66013190636712e-05
pos_2630	9.0735262030785e-06	1.17828953639591e-05	1.16169174084233e-05	9.14186274452291e-06	7.54317534772037e-06	1.07582399208674e-05	8.95237181368622e-06	9.56139020191554e-06	1.04332037082986e-05	9.25131825026919e-06	8.82778111895881e-06	1.00956520996356e-05
pos_2631	2.30563242279855e-05	3.30696507458647e-05	2.69157195299742e-05	2.84093221712121e-05	2.50196038190218e-05	2.31531840863414e-05	3.67169307804228e-05	3.44116380222525e-05	2.16764064761061e-05	2.21532788551299e-05	3.19941937061356e-05	2.75162460002868e-05
pos_2632	0.000242736553716839	0.000127993613486279	0.000206757574330761	4.59707180048228e-05	6.77917509716125e-05	7.63366805058419e-05	1.83558258379618e-05	6.21630219195337e-05	3.35508961242796e-05	0.000139143853087296	8.70005511265065e-05	9.73691241617493e-05
pos_2634	6.85942659891695e-05	7.12554438325447e-05	0.000157101738795084	4.54871671921662e-05	6.92089360744615e-05	7.53648552958747e-05	4.14177190649448e-05	6.80410020010183e-05	4.43811632564306e-05	0.000168145755344103	7.65361113580924e-05	0.000135872160632909
pos_2635	0.000735497689150831	0.000885037628982217	0.00124831077498261	0.000701529123659018	0.00078152828333015	0.000855200698303151	0.0008448629768549	0.000957382232122152	0.000738767890515888	0.00105828650129418	0.00114055808405621	0.00104620335622384
pos_2637	0.000307847318545635	2.83102297684623e-05	3.87709221694153e-05	2.46489787782118e-05	0.000148216273471311	0.000131848498036633	0.000123446652809637	0.000105132297792452	5.13008155351633e-05	7.71592501840565e-05	8.6170557086701e-05	7.67465628904586e-05
pos_2638	0.000104479802849284	0.000103161691244092	0.000115603477869147	0.000135780975696915	0.000176031151039962	0.000162666416851554	0.000202226184318192	0.000162174198635727	0.000116691942639717	0.000172820799167028	0.000169186358071712	0.000137089719874055
pos_2639	6.59858776798191e-06	2.06580966015575e-05	1.66266239263864e-05	1.73741877442253e-05	1.22337188039572e-05	1.73340800737099e-05	1.32010547711839e-05	1.39182744598592e-05	1.92441132155473e-05	1.52296840627033e-05	1.7263408922975e-05	1.37459450502179e-05
pos_264	9.39209893006896e-05	0.000172195417762958	9.45711092100057e-05	9.79025072350743e-05	8.17023198450347e-05	0.000102439239560057	0.000163550582245949	0.000133172041473016	9.93137394319781e-05	0.000102664490119037	0.000121507463335473	8.77813339692913e-05
pos_2640	4.41631182538893e-05	3.59247453845231e-05	0.000144462328205974	6.35109888428913e-05	4.19528294133412e-05	4.70401167481755e-05	4.0843001789911e-05	4.25217247570684e-05	8.71331664523238e-06	7.94373584834568e-05	4.37904136526941e-05	7.66244599806793e-05
pos_2641	4.74885414338882e-05	5.63932061811834e-05	5.12399735493742e-05	9.60291665988755e-05	6.56294635957697e-05	5.16390600428672e-05	4.86388690435929e-05	5.6791117542612e-05	8.06640782742951e-05	6.47464361970101e-05	6.89321052546649e-05	5.32172757060938e-05
pos_2645	0	8.2050639769942e-08	0	3.25986399193232e-05	0	2.33092537320823e-07	2.30902371364624e-07	0	0	0	0	1.90169315902483e-07
pos_2646	2.1473814136239e-07	1.26488643608043e-07	0	0	3.13614350255049e-06	3.31326351726453e-08	0	2.86333602754474e-05	2.01573780944845e-06	6.33518831228592e-06	0	1.71312803512538e-08
pos_2647	4.12373283574826e-05	6.31188206326908e-06	7.42789828496002e-06	7.199355451695e-06	2.39350656780255e-05	2.16252273483953e-05	2.11372401161284e-05	1.57997969096102e-05	1.13017621208025e-05	1.73773252703273e-05	1.4344279219683e-05	1.45640758222301e-05
pos_2648	0.00012121445642916	3.01233760572171e-05	2.8448237795361e-05	2.52107709618003e-05	6.74192299744451e-05	6.33159910017021e-05	6.42901611577918e-05	5.11391469502951e-05	3.46944124505787e-05	4.89124583990786e-05	4.69455500343075e-05	4.55963206648234e-05
pos_2649	0	0	3.48464569400877e-05	3.54884043708186e-07	0	1.1378019526312e-06	9.83165832460491e-06	6.49669213127219e-06	0	0	1.65806409012599e-06	6.60947797147066e-06
pos_265	1.84498451604234e-05	2.8621620908817e-05	2.80192440503271e-05	2.13823366129655e-05	2.06890096239768e-05	2.3500865631922e-05	2.24907344500729e-05	2.2686042603043e-05	2.38935197209312e-05	2.23156864107094e-05	2.45016436942106e-05	2.27434959616266e-05
pos_2650	0.000250295847544822	0.000420445125954866	0.000194235572555777	0.000323051222365757	0.000130968601078514	0.000235844857287646	0.00050941636491531	0.000292299192753149	9.20461839255092e-05	0.00039480061326193	0.000202315026556372	0.00019022846158256
pos_2651	0.000854415516490218	0.000349323941706794	0.000299952834332926	0.000301460495074293	0.000617066299828302	0.00061885582063819	0.00056542644263158	0.000510128035048921	0.000451799011558692	0.000442691312334165	0.000440422456438852	0.000505070749299198
pos_2653	8.74118821189913e-05	8.31779640302273e-05	9.20816220131921e-05	7.55333522440746e-05	8.03130889959435e-05	8.70799419885248e-05	6.32457325037639e-05	8.12991231525841e-05	9.72454164138909e-05	6.9127200495674e-05	8.9046502616249e-05	0.000100920520390995
pos_2655	0.000209491240677212	0.000110744668565213	0.000115652762437556	0.000162744898315917	0.000116395055275201	0.000142980270854587	0.000176215303193778	0.00015967574926165	0.000115921419163139	0.000127306810673621	0.000140589152615417	0.000152750049774572
pos_2656	2.73517560429772e-05	3.9879321323178e-05	2.66682373107605e-05	3.58879505493609e-05	3.23764675650897e-05	3.0216337107654e-05	2.99666405194484e-05	2.91575346765997e-05	3.40391347484604e-05	3.16096835518497e-05	3.00438743836575e-05	2.37633344554476e-05
pos_2658	0.000578490496146921	0.000751468867815889	0.000686997389941389	0.000610315962234195	0.000522305194515345	0.000600323859397811	0.000546184672238363	0.000625061802912379	0.00067711952252924	0.000566813404726513	0.000603938876021583	0.000583637079481425
pos_2659	1.6687942304752e-05	1.87695587066218e-05	2.2890088471515e-05	1.57448194719578e-05	1.39241951684861e-05	1.69953251955841e-05	1.73517416758225e-05	1.98068937407565e-05	1.80986052173335e-05	1.71335967817895e-05	1.70378060212764e-05	2.02052921865816e-05
pos_266	3.5025093681202e-05	3.70373753786493e-05	3.53649400040863e-05	6.85821387717233e-05	5.61100079512384e-05	5.55314333858553e-05	3.20474926213124e-05	4.07470577611032e-05	6.32159212592189e-05	3.23829863899882e-05	3.90918663785988e-05	5.51761303215189e-05
pos_2660	0.000967462485582657	0.00110541648391961	0.00107242445931698	0.000858095258630156	0.000708515080854387	0.000600578363215533	0.000635516823561436	0.000659991114355796	0.000788641314976542	0.000629645824067759	0.000646529558374018	0.000630607256323466
pos_2661	0.000395612262932945	0.000496605538321511	0.000313450431004373	0.000399153700741314	0.000277543925235139	0.000456756566066983	0.000327534312065011	0.000415349919449628	0.000441080580001209	0.000320531383090192	0.000431567090844708	0.000384022633304414
pos_2664	2.38167027049076e-05	1.84398491374838e-05	7.08022021074028e-06	2.01574251242166e-06	2.98101209907358e-06	2.21718040301903e-06	5.29651371832441e-06	4.67477487619647e-06	2.9259513437649e-06	1.8296156691307e-06	7.07684388219868e-06	7.82092913566065e-07
pos_2666	2.25816179426485e-05	3.69086356479264e-05	2.14079008022221e-05	3.46721718318787e-05	2.66322379984898e-05	2.70066225245455e-05	2.86027858278049e-05	2.56255202259439e-05	3.26263274464427e-05	2.84048094738919e-05	2.69756412159349e-05	1.6517448615957e-05
pos_2668	8.76122563693226e-06	7.48134759219656e-06	2.67016966884243e-06	5.81811611222635e-06	6.02120124704375e-06	5.60118185576896e-06	4.1049899929343e-06	3.73693943016811e-06	5.89513395617505e-06	5.59950540364434e-06	5.4732403522611e-06	4.04541942960719e-06
pos_267	3.52006158895164e-05	5.23335311828754e-05	5.30412003122594e-05	4.91537432778951e-05	3.98196006621955e-05	4.45723839842207e-05	4.04303814118328e-05	4.56021542867809e-05	4.37950832166438e-05	4.266227443159e-05	4.39863886420075e-05	4.90105745935216e-05
pos_2670	0.000664383610209987	8.42160624600345e-05	0.000114311410172359	8.81392759377841e-05	0.00035157291253267	0.000343766010276238	0.000298606064765979	0.000236395035313025	0.000157108735201252	0.000211121781657081	0.000232150193615406	0.000202003724167541
pos_2672	0.000347591036710439	0.000327047892749177	0.000276709601904694	0.000290263742725009	0.000746542628201516	0.000372800589643363	0.00106388485444809	0.000628253401411172	0.000344121671354845	0.000470350224343736	0.000468582108813413	0.000701895877091643
pos_2675	4.3632997722374e-06	3.52920956615777e-06	1.37402536022573e-06	2.38734028853289e-06	5.4528186403506e-06	3.24184166962635e-06	3.60679759156445e-06	2.87507938755706e-06	3.29715460036219e-06	2.77001327735482e-06	3.39982967681533e-06	4.56218579414552e-06
pos_2678	1.31918634207039e-06	2.14326546184496e-06	2.55848402770987e-06	3.52656409122857e-06	2.1510783529691e-06	5.89731804892491e-07	1.20865846295757e-06	1.87114871317157e-06	2.35224291892581e-06	3.6245048736744e-06	2.21430256423033e-06	2.37320173489539e-06
pos_2679	4.54613515502366e-06	3.94909371733196e-06	2.17980260279104e-06	1.71244690841797e-06	8.96601547492148e-06	4.32709509504909e-06	8.65804024294666e-06	5.67147200858763e-06	7.71415661843228e-06	4.89284666739301e-06	4.69301440429001e-06	2.94790874054022e-06
pos_268	0.00011982766901343	6.39763751329079e-05	3.18871000396651e-06	2.1986203658583e-05	6.90906509893135e-05	4.20297773678383e-05	4.31025476324088e-06	4.99413679820928e-06	4.55988558354288e-06	1.82894832277181e-05	6.83679418527155e-06	3.09099463268671e-06
pos_2680	3.04336249590677e-07	4.27089542476816e-07	0	3.4891757908147e-07	1.05912516643588e-05	5.51692900533858e-07	1.99187614775294e-05	1.21241226726522e-05	8.3898028349497e-07	1.24724747560662e-05	3.77550264310477e-06	6.76562756098792e-06
pos_2681	4.5873176170116e-07	9.85811788674072e-06	5.09962743838088e-06	7.30728316696103e-06	2.65234352831484e-07	4.86733596780964e-06	1.13722696043115e-05	8.52349892362375e-06	2.2295255498568e-06	1.59304931081016e-05	1.05322851284378e-05	3.91297661717355e-06
pos_2682	0.000314637145955568	0.000210318021447846	0.000194268113308641	0.000168513479029225	0.000200878103299634	0.0002190983089848	0.000226831081401648	0.000220218785068824	0.000217065656852394	0.000194407485916059	0.000203451193219657	0.000209418787965723
pos_2683	0.000144924149313717	0.000104516205444466	7.62692441852248e-05	6.54710034053828e-05	7.95974833690492e-05	7.95904891951302e-05	7.72145199376143e-05	7.82547233777296e-05	7.49308768797797e-05	6.9471930379464e-05	6.9784162097572e-05	7.60519348460574e-05
pos_2684	1.32959056709472e-05	2.37163729669853e-05	1.92467238413807e-05	2.12018283675847e-05	2.37100982874683e-05	2.02730321387063e-05	1.87799887587994e-05	1.81014502508919e-05	2.04013553358833e-05	1.8630528573979e-05	1.91836129779367e-05	1.93042845933898e-05
pos_2687	0.00483045090618742	0.00649952542840324	0.0059650011539632	0.00537362008631663	0.00452186451235938	0.0054059861972777	0.00470986126408356	0.00524925901606932	0.00586646343456515	0.00485459713529972	0.00535893149322621	0.0049486744857357
pos_2688	4.37808503072985e-05	5.64780494996087e-05	7.63789950140104e-05	7.50874387685559e-05	7.90026233196409e-05	6.4701908402488e-05	7.29007246687391e-05	8.11250970930978e-05	6.47936981230335e-05	6.41350551911928e-05	6.64890503182846e-05	7.25193573768001e-05
pos_2689	6.87255332169672e-06	4.3805407601974e-06	9.53287628307005e-06	0.000165476683121405	0.00013601448831174	5.8280356253001e-05	0.000147011533202541	8.04085788859977e-05	0	1.8011140064112e-05	5.22663357939627e-05	5.43667501441183e-06
pos_2691	6.22450684285582e-05	8.56848778082514e-05	8.58602720871774e-05	8.38735733867906e-05	9.9865033556633e-05	7.35128612100108e-05	7.66531508500714e-05	8.62545956023656e-05	9.03906021206777e-05	7.19241788813201e-05	8.54050969065992e-05	0.0001091795004353
pos_2693	0.000144972494973305	5.59483255585217e-05	5.36517112903416e-05	4.66540583499442e-05	8.87327611835317e-05	8.83894693141225e-05	8.8240456911477e-05	7.90008126640935e-05	6.33512657026564e-05	6.86673626307741e-05	7.11942812989598e-05	6.49598064122128e-05
pos_2695	2.20114945477439e-05	0.000493410711688166	6.59144083768215e-07	0	3.04881512729099e-05	9.5764674885152e-05	6.31330312976895e-05	2.8990152426495e-05	0.000184968134744374	5.97669567914876e-07	6.28633342538826e-05	3.92611625692746e-07
pos_2696	1.59194986978312e-05	1.88856104113249e-05	1.77878043034317e-05	1.92990353575966e-05	1.6249651743551e-05	1.74253910754013e-05	1.9285057284933e-05	1.88034457030805e-05	1.87327412518787e-05	1.84733693237962e-05	1.76392235637214e-05	1.73977583624714e-05
pos_2697	0.000211418173873323	0.000184296311611197	0.000162240629710701	0.000154232668368434	0.000147133959220445	0.00017508325539394	0.000135865675885357	0.000171625844493471	0.000143991138303858	0.000173943751215438	0.000160941863615557	0.000212712438595186
pos_27	0.000122831587835226	0.000383195288763028	0.00184490460957996	3.60232992284665e-05	0.000113090662344688	0.000494362204270199	2.21728175291721e-05	0.00278271185820675	0.00267992519946483	0.000229135172321272	0.00105170988278017	0.000499242554222661
pos_270	7.02293313161923e-05	7.03819954154266e-05	0.000152114009272423	5.13006241911389e-05	7.81777603685293e-05	8.4419908232973e-05	4.38508199757414e-05	7.51266199375871e-05	4.73134739742588e-05	0.000241659899790611	9.51886245241142e-05	0.000110904992068656
pos_2700	8.64622045230975e-06	2.29489053126522e-05	9.98220216880113e-06	3.30014939150902e-06	2.42680149868707e-06	4.27042915357679e-06	1.207092649748e-05	3.96770776063662e-06	5.8133739623576e-06	1.73455417208618e-05	8.6950024015914e-06	2.05549207796143e-06
pos_2703	2.43711611547172e-05	4.38622878927207e-06	3.69840402137593e-06	3.97290601244684e-06	1.25489795455036e-05	1.02310253912232e-05	1.11208189877138e-05	7.27345733673055e-06	5.89810844651628e-06	6.93583834865524e-06	6.54544706348562e-06	7.87259586963359e-06
pos_2706	0.000466405761155769	0.000808578163036744	0.000547182627448363	0.000887053586872959	0.000590029417941922	0.000703469710907378	0.00051746234856388	0.000598726313946634	0.00128817777548864	0.000503187787318301	0.00093967967269753	0.000893031438279754
pos_2708	5.08691225345983e-05	7.0578189331046e-05	3.46849568017501e-05	4.75088950988966e-05	5.30380979038144e-05	4.84091712109487e-05	4.98789603795512e-05	4.44049234832173e-05	5.35053483570593e-05	4.78924653409187e-05	4.66944753252659e-05	3.66330258651969e-05
pos_2709	0	7.09657521181548e-07	0	3.44085559238131e-07	3.60121160408886e-07	2.08721797527322e-07	9.61307531158691e-08	0	4.9347188802203e-07	8.0400694148534e-07	0	9.40632130717569e-05
pos_271	0.000457025537290329	0.000452455727347218	0.000510290085542277	0.000319563285546615	0.000273646249550384	0.000407026263554647	0.000124063015084409	0.000281753506518555	0.000137599826622595	0.000522297865305603	0.000291483242470037	0.000526616496348162
pos_2710	5.63635271632787e-06	6.30714124887327e-06	8.53310184589211e-06	1.42497367577021e-05	8.31783548806343e-06	9.77024428822896e-06	6.76072811685551e-06	7.00140937079487e-06	8.89443683951604e-06	9.05192936330824e-06	6.82673519766664e-06	6.55434106285101e-06
pos_2711	3.34484071139057e-06	4.99680034201956e-06	3.93242188761917e-06	5.91112566499888e-06	3.46633678495013e-06	3.20564016017936e-06	5.3125520923536e-06	4.76591408964865e-06	4.91211040782187e-06	5.78463924529416e-06	4.90764556663515e-06	4.60801385377776e-06
pos_2712	0.00215927681048513	0.00267564377796986	0.00243532561413788	0.0032660544839504	0.00239966783715559	0.00242457126650391	0.00213195982153504	0.00222675373925636	0.00177342837750843	0.00189341800964783	0.00216475594622591	0.00242878928105859
pos_2713	0	7.6135479030892e-06	0	0	3.70364043780711e-06	8.17851062817422e-07	4.25489803836538e-06	4.18864964507146e-06	7.45642739109551e-07	6.08187996428406e-07	3.98794982197952e-06	2.24995492332451e-06
pos_2714	1.72007986908107e-05	2.58025517956837e-05	2.25738196962507e-05	2.15413895254117e-05	1.75548883957284e-05	2.1297467718663e-05	1.77974008215437e-05	2.14068217396426e-05	2.3460118928116e-05	1.94895866175411e-05	2.23290652083053e-05	1.9091996542795e-05
pos_2715	9.66651572225508e-05	6.08856888011354e-05	5.69026402383616e-05	5.77457908019314e-05	6.6490141213859e-05	7.25816153525943e-05	7.58191600355696e-05	6.77465592487378e-05	8.43017245480291e-05	6.37695235503733e-05	6.02205330808928e-05	6.74474997745636e-05
pos_2716	0.000723911467671707	0.000519942693955422	0.000456716957463282	0.000403761048010607	0.000409132808718183	0.000505253155317993	0.000505340258801171	0.00050295078539047	0.000498915730786082	0.000450219111435768	0.000476866096948965	0.000469779702373455
pos_2717	8.79535231667916e-06	1.75435138571152e-06	1.24789097791254e-06	1.53914112810364e-06	2.62715864446118e-06	1.92014291317243e-06	3.92341355289929e-06	2.62790474218414e-06	2.4163979808042e-06	3.23262768068682e-06	4.26480650072228e-06	6.29884169790701e-06
pos_2718	1.46649281201516e-05	7.80797772597592e-06	4.16762313642079e-06	1.57555445473007e-06	2.06104885007301e-06	2.0816989160572e-06	2.57859641324757e-06	2.92001860014302e-06	0	4.56871729378806e-06	1.12540576358813e-06	2.43911524694663e-06
pos_2719	0.000747249732989348	0.000178406792191317	0.000199896336619856	0.000153490276212793	0.000428583288170584	0.000413209531835457	0.000379294416008829	0.000325499978701041	0.000243149621252812	0.000282599287259573	0.000311777520405938	0.000295833052428477
pos_272	5.11542111239528e-05	6.33850608646717e-05	0.00010824666052773	8.17531334772085e-05	4.78709911534714e-05	7.09290528405119e-05	7.11602132212011e-05	8.48746960293324e-05	5.83816826724365e-05	8.61906263899058e-05	8.48333744691942e-05	0.000122233822325827
pos_2720	0.000153667714809123	0.000155399863051336	5.23277734750838e-05	8.41087767271159e-05	0.000121434733008807	0.000126149448110565	0.000196730399809622	0.000153897385167027	0.000275889604839376	6.56242384712145e-05	0.000220864216104876	9.49008132162378e-05
pos_2721	8.30239319686937e-06	9.9054449050134e-06	6.85768412427439e-06	8.43674889221539e-06	7.1251175300446e-06	8.40012618054151e-06	7.06000867116265e-06	5.4870567810148e-06	8.06817703120555e-06	7.76031415368112e-06	7.4599920640364e-06	5.69842262915584e-06
pos_2722	1.36802292905289e-05	3.28896387309961e-05	1.60477929085612e-05	1.0804947712029e-05	2.04949860573827e-05	1.76050708923788e-05	1.53021502291806e-05	1.5745156311542e-05	1.25543856822151e-05	2.60407793848442e-05	1.63205359383515e-05	1.48509025273222e-05
pos_2723	6.33429880918061e-07	4.25797072442395e-07	7.62149196845355e-06	1.27587487184048e-05	8.74481892476824e-07	3.57015550621708e-06	6.3799240531487e-07	4.3683518430479e-06	4.65354712931256e-07	8.02559786598736e-07	2.5494695047957e-06	1.29792363930132e-05
pos_2724	0.000577563811297232	0.000632328256703711	0.000795164966871898	0.000757451408994644	0.000723571721071616	0.000828642449212498	0.000878224954585378	0.000939991933968553	0.000761844693620069	0.000856735401603917	0.000733277591167959	0.000738956692393365
pos_2725	1.91606045702276e-05	1.5608299740946e-05	1.01914216616763e-05	1.29844090759315e-05	2.84346481980758e-05	1.31353758108753e-05	1.66330501317258e-05	1.47239462784082e-05	1.1616566124935e-05	1.89604410959452e-05	1.22190733825518e-05	1.84178350676873e-05
pos_2726	5.8069857317188e-06	6.0007016439007e-06	3.38439851025723e-07	2.64767465405844e-06	6.3111508135066e-06	4.25095002201264e-06	5.03961231750085e-07	6.41862472184432e-07	4.76183283719477e-07	3.49093648047599e-06	1.00734504411042e-06	4.98726197099223e-07
pos_2727	5.38159104096222e-06	1.1743978527265e-05	4.19022335756091e-06	7.71706406657296e-06	1.3747054441161e-05	8.78863843328977e-06	5.11369748008449e-06	2.98383048499997e-06	1.45373992295246e-05	7.60321847809142e-06	7.55854345587177e-06	6.44572981113025e-06
pos_2728	0.000884030850305768	0.000453274128850688	0.000412577834894319	0.000379295776847445	0.000439038225088093	0.000470777385045281	0.000498996411442122	0.000449785354371935	0.00045275372623239	0.000410107903503359	0.000441489412540393	0.000423258021304381
pos_2729	3.04380755922652e-05	7.67265915600289e-05	5.05613062423678e-05	6.42869828755269e-05	4.13102967851202e-05	4.43468707931651e-05	6.28532038630696e-05	5.84790194870374e-05	4.92579340219449e-05	4.13224521537171e-05	4.30403552245645e-05	5.39081953037593e-05
pos_273	0.000116649392258678	0.000128082946033019	0.000105904266827121	0.000148713364557041	9.89093569682492e-05	0.00011994361664337	0.000161377632647948	0.000142418926589389	0.000105037987459771	0.000130132702933533	0.000130195268806435	0.00011949442002986
pos_2730	2.08830247284401e-05	2.80666512652216e-05	3.43938062690179e-05	2.04166788853323e-05	2.49810486023836e-05	2.65448643399368e-05	1.39124553549415e-05	2.57140463731412e-05	1.92114981963593e-05	3.73179033994834e-05	2.84116377631862e-05	3.42466870633396e-05
pos_2731	2.13280743649978e-06	2.71886080462635e-06	3.20797684876546e-06	3.0567035978232e-06	4.82574362768698e-06	3.08945909369549e-06	5.64031919967479e-06	3.60603925528613e-06	3.81425978599546e-06	4.91857068350647e-06	5.10912697626294e-06	6.69596731760669e-07
pos_2732	2.74393591434596e-06	3.36495919196954e-06	2.50690924972886e-06	3.21006228274556e-06	2.80290153500419e-06	3.14584119156963e-06	2.6971901309638e-06	2.51512970680046e-06	3.71325633838502e-06	3.2756050080796e-06	3.64498128316018e-06	3.35739447470041e-06
pos_2734	4.9332346197701e-05	6.37253634403989e-05	6.02507914796559e-05	4.92439239846308e-05	4.65910736102414e-05	5.37698103274383e-05	4.90222895265381e-05	5.38263971639904e-05	6.35169760837989e-05	5.1277213379641e-05	5.56717445749945e-05	5.07149538151887e-05
pos_2735	7.30951422286157e-05	0.000101723116164959	0.000105906065477977	0.000158870515659584	8.9077003158659e-05	0.000108943785582256	0.000173126184263709	0.000131177702951061	0.000109726610639009	0.000119632051228993	0.00013362199531977	0.000106259743866518
pos_2736	1.11787067654593e-07	2.0557660451714e-07	0.000264990901862693	0.000874246788459787	5.27949206784895e-05	0.000241928640677327	5.43637655990883e-07	0.000185738169539449	0.00113929019213654	6.20833839541062e-06	0.000373917568601477	0.000466543507528774
[truncated: 851 more rows]
