# Supplementary material for: Multi-omics analyses reveal that the gut microbiome and its metabolites promote milk fat synthesis in Zhongdian yak cows
Source: PeerJ journal article supplement (doi:10.7717/peerj.14444), 2022-12-02
Supplement: biomarker_Web_Report_.zip [file All_pca_loadings.xls]

#ID	PC1	PC2	PC3
pos_1	-0.000133507051840291	-0.00287313526387386	-0.0027153221705061
pos_10	0.794244947158474	0.0460827351937494	0.231823718392242
pos_100	0.00113044135043691	-0.00136980527849605	0.00102043996721779
pos_1000	-0.00403215486115444	0.0121372649628509	-0.000555661046813278
pos_1001	-0.000216796136729026	0.001220483077703	0.00186425965864786
pos_1002	5.52518800662583e-05	-0.000112828640160756	2.16804870860771e-06
pos_1003	-0.000814376626167296	0.00167623558097453	-6.58730937739504e-05
pos_1004	-0.000220972395850752	0.0017403488822038	-0.00509191022047995
pos_1005	-0.000371941886306016	0.000541284815662922	-0.000386333330761232
pos_1006	-1.99981855055319e-05	-0.000147166400269985	-0.000205059301228296
pos_1007	-0.000400717778784292	8.12629058859238e-05	-0.000659191088423481
pos_1008	-0.000674973962713087	0.00357831618124746	0.000145856019231644
pos_1009	-0.000480248205307641	0.00179671856839455	0.00023200216026175
pos_101	-0.000281463876053504	-0.00159101410799269	-0.0011952492645062
pos_1011	1.58945577950909e-05	-8.21942847683788e-05	-4.44907324631385e-05
pos_1012	0.000354318553977343	0.000146289973682263	0.00110555560956736
pos_1013	0.00223606025916334	-0.00362353720260111	-0.0031758783763556
pos_1014	-1.23096997308269e-05	8.4072364009435e-05	-2.58367837868962e-05
pos_1015	0.000163841344891222	-0.000163652553679247	-0.00150089533477879
pos_1016	1.41668367404151e-05	1.79798235408688e-05	-7.90368353147152e-05
pos_1017	-0.000231490775555994	0.00310395565880022	-0.00218274493957902
pos_1018	-0.000253857746247232	0.000967709032520944	0.000221784579941838
pos_1019	-0.000276102662954924	-0.00158310785550225	-0.00106562953117329
pos_102	0.000965455857760599	-0.00171469995373275	0.00225353763005101
pos_1020	8.18637384798276e-05	0.000164333667251731	-0.000964033417768943
pos_1021	-5.90708264640407e-05	-7.83294274179182e-05	0.000241338282330961
pos_1022	-3.6674941670907e-05	-4.58661073827601e-05	-4.3808445192903e-05
pos_1023	-0.0048676105648233	-0.0460760083293661	-0.0543853026816573
pos_1024	9.84493548134722e-05	0.000332080971760863	0.00301725040820073
pos_1025	-0.000224004725953209	-0.000295156963190944	-9.05503487617907e-05
pos_1026	-9.0575717253937e-05	0.000104357598030272	-0.000379967320886293
pos_1027	4.70302803877283e-05	-4.6753959139963e-05	-3.73694420087348e-05
pos_1028	-0.00139835654128329	-0.0037909755980155	-0.000578874420693719
pos_1029	-0.00630969539961789	0.0211842838740104	0.00018481869965031
pos_103	-0.00473767379368589	-0.00806087143236729	-0.000222523547350886
pos_1030	-8.88747942288838e-07	-0.000273513459593716	0.000102620037369364
pos_1032	-0.00437097568624823	-0.0152697688438924	-0.0358593831955585
pos_1033	1.85559209210522e-05	-0.000110389618392936	-0.000259384703452912
pos_1034	-0.00402954990699926	-0.0142588042339857	0.00560064813795082
pos_1035	-5.92505915935816e-05	0.000434930960104879	2.91963093427891e-05
pos_1036	-0.00018601979575778	0.000238993098004065	-0.000406235501147355
pos_1037	-0.000629843561035131	9.48262126632774e-05	-0.000789351345147744
pos_1038	-0.0011034253398453	0.00502569710070399	0.000810009948495119
pos_104	-0.000389627806681705	-0.000503122918272038	-0.00110405125517781
pos_1040	-1.04796467549726e-05	-0.000154798707838975	4.3990701181783e-05
pos_1041	0.000211245967152039	-0.000943936355401921	0.00264526648067393
pos_1042	-1.85408111075366e-05	-0.000274379850572441	0.000324665134775525
pos_1043	9.44547028221852e-06	-0.000123434066881785	1.33689242705168e-05
pos_1044	2.91739555236846e-05	-0.000118338981467322	-0.000104502185697312
pos_1045	-0.000559232489264994	0.00183686759622585	-0.000415186756874751
pos_1046	-0.000430834048132292	0.00211635519623359	0.000534814462000601
pos_1047	-0.000351437075637727	-0.000221331245050074	0.0012016174505619
pos_1048	-3.95527886664104e-06	-2.57874515301006e-06	1.31962627591966e-05
pos_1049	0.000167519561102148	-0.000157963704854042	0.000909588190369035
pos_1050	1.99156965672533e-06	-0.000197626022265892	0.000677641684868025
pos_1051	-2.51499865756939e-05	0.000129575030700897	1.39906980246429e-05
pos_1053	0.00013350382777702	0.001897249556757	0.00709174765619192
pos_1054	0.000175587211549632	-0.000132748583795217	-0.00163838912482892
pos_1055	-0.000841354143318488	-0.00109819439396953	-0.0029252539834143
pos_1056	1.23973663907531e-05	-3.70421073766139e-05	-4.33918572320218e-05
pos_1057	-0.000126157555769229	0.000787143556348097	0.000172348155726322
pos_1058	0.000351467962812885	-0.000415110502042776	0.00149061376970857
pos_1059	-1.74393276253742e-05	-6.74426906097736e-05	-0.000111825810413409
pos_106	0.00158257477856866	-0.000613919168378854	0.000932402369491651
pos_1060	0.000171800192389576	0.000379193467514584	-8.24255381408374e-05
pos_1061	-7.29662724007566e-05	-0.0001362793681396	-0.000193059693430332
pos_1062	-0.000260393439580529	-0.000787920131793814	-0.00107741176279628
pos_1064	-2.94158569303995e-06	-0.000227403418616069	0.00021702480543666
pos_1065	-0.00181887631403074	-0.00347216789560898	0.00425045150234253
pos_1066	-0.00457041712375041	0.000108890626119643	-0.00255492302524067
pos_1067	-0.000775459712329472	0.00216999971465403	-0.000572879958664248
pos_1068	-0.000698284184416682	-0.00432288094158456	0.00301185982930475
pos_1069	0.000157637937385826	0.000127792706699663	0.000982352259226262
pos_107	-0.00198127348891728	-0.00171716327301391	0.00223057322340905
pos_1070	0.000155368576690371	-0.00010372350079689	7.55501789760347e-05
pos_1071	8.29114484900853e-06	-0.000329696254579702	0.000322728405886846
pos_1072	-0.000193346724285374	0.000251629158164934	6.40780195204668e-05
pos_1073	5.40138875019907e-06	-8.38298480840401e-05	9.00624220418636e-05
pos_1074	0.000253950285568657	-6.7564394288143e-05	0.00227814272122163
pos_1075	-1.10518910463347e-05	-9.51241996204976e-05	4.56786530861594e-05
pos_1077	-0.048394278192836	-0.108870065783614	0.0195972513679949
pos_1078	-0.0022795678698921	0.00747808030154478	-0.000433694669280111
pos_1079	5.73508385754611e-05	-0.000329638329575885	0.000160685798369019
pos_108	-0.0002275903223012	-0.000641905496204325	0.00211313771939898
pos_1080	-1.56106155863226e-05	0.0026254439114679	-0.00228137138490804
pos_1081	7.01531101867186e-05	-3.0596438657751e-05	4.07866186443985e-05
pos_1082	-3.12678169548552e-05	5.63456527566542e-05	-8.89453947090522e-06
pos_1083	0.00750135741039228	-0.0344156341054082	0.0230631443706162
pos_1084	4.98027118489133e-05	-0.00016374870318785	0.000157288419845463
pos_1085	-1.10890315180205e-05	-0.00025223337538645	-0.000148601431738829
pos_1086	4.03360800593363e-05	-7.439806946129e-05	8.65961154630267e-06
pos_1087	3.53421772804163e-05	-0.000919470880778595	-0.00146954315062641
pos_1088	-1.39507241422534e-05	-3.62848410137932e-05	0.000131492318064574
pos_1089	-0.00013176033212371	5.72106421195139e-05	-1.90345685825918e-05
pos_109	0.0011799572445999	-3.83529534085389e-05	0.000383384258289027
pos_1090	-0.000201174403050032	2.35219491255794e-05	-0.000113774286177125
pos_1091	-5.09626238738475e-05	-0.000260269157402198	-0.000130223961744227
pos_1092	-8.61757657924507e-05	-2.48955799583414e-05	0.000262796381084949
pos_1093	-9.4282770189732e-06	5.19823917258541e-05	2.08792147472303e-05
pos_1094	0.000109965285036457	-0.000736936376833699	-0.000500994225532514
pos_1096	-3.61342283896612e-05	-2.04002995306242e-05	-0.000102732571514514
pos_1097	-0.000219771280200348	-0.000683602468064105	-0.00065865730556176
pos_1098	-2.83241570289237e-05	-9.55485727639554e-05	-4.37875281384859e-05
pos_1099	0.000200378855838134	0.00216081946991675	-0.00104258839472056
pos_110	-3.34801324078523e-06	-0.00052202642812706	-0.000385318090363007
pos_1100	0.00361967181417816	0.00163626310326697	0.000838913097316823
pos_1101	-0.000847974482518626	0.00242410742999586	-0.00553738579866832
pos_1102	-2.63027202941952e-05	-0.000142052026291233	-0.000184657165081475
pos_1103	-0.000158039421746995	-0.00175641459242722	-0.000854856591171222
pos_1104	-0.000108518155375054	-0.000182262019660884	-0.000364191914113679
pos_1105	-0.038624432010161	0.132782305144585	-0.00496276460010658
pos_1106	1.8309026634064e-05	6.86243475249476e-05	6.01929430687439e-05
pos_1107	-0.00142631256012631	0.00356563833613309	-0.00018392550744666
pos_1108	0.000650479975257019	-0.00112709082065689	0.00273648347560507
pos_1109	-0.00186857373384662	0.0092082056847597	0.00145126883975431
pos_111	-0.0105545819471266	-0.0110222019436193	0.0174289340322229
pos_1110	-0.00916427092618936	0.0383159613380161	0.0108188400888267
pos_1111	-0.00386364728547473	-0.00522378439419946	0.0308969665799634
pos_1112	-0.000652458844666948	-0.00226525752390926	-0.00377714744401404
pos_1113	0.000203719469695703	2.78678705179407e-05	-0.000141504785012649
pos_1114	-9.54729036510902e-05	-0.00039855226813494	-0.000488416573976074
pos_1115	-0.0192904433156862	-0.0209563885442161	-0.104948263796291
pos_1116	-0.00103615560281411	0.00311942084594076	0.00037018543279843
pos_1117	-9.04458014136198e-05	-0.000502076161306103	-0.000288133975711372
pos_1118	-1.16459586060687e-05	-0.000491400943191612	-4.65578258639692e-05
pos_1119	-8.77107611377804e-05	-0.000253701677844863	-0.000229068544013163
pos_112	0.000467022998623734	-0.00180501490546583	-0.000685058894642659
pos_1120	-5.18830504655358e-05	-0.000489243338210131	-0.000311323727019077
pos_1122	-0.000111061785682304	-0.000158636504905932	-0.000200381869315596
pos_1123	-2.20531971548931e-05	0.000113781825007507	-7.61693205356458e-06
pos_1124	0.00134329017250006	-0.00191364909797813	0.00865310290991168
pos_1125	-0.00782224508799942	-0.00085801636340029	-0.0352582466034507
pos_1127	-0.000800714880322795	-0.00543022962727439	0.00629058825831567
pos_1128	-1.53571776081137e-05	-9.37800275204174e-05	0.00011194362338876
pos_1129	-5.5558761346164e-05	-0.000146181702226833	3.13063144554919e-05
pos_113	-0.000372012218103678	-0.000553080591797062	-0.000691718479495454
pos_1130	-0.000117561787116877	8.82026720809654e-05	-8.73841608188369e-05
pos_1131	-0.000187256235079843	0.00103665722496539	0.00100216474578686
pos_1132	-0.000243546105456417	0.000560662734127012	-0.000101203067816408
pos_1133	-2.82444418110406e-05	1.42180853235288e-05	-0.000467735429003996
pos_1135	-0.000282552465775818	0.000511490925646512	-0.000286576556195076
pos_1136	-0.00125741140302339	-0.00126421945851548	0.000329403511004831
pos_1137	-0.000347803967748854	0.00256114916499226	0.000463145347635078
pos_1138	-0.000111958703338554	0.000732058333460645	0.000140615864741233
pos_1139	-0.000325115806112236	-0.000989813386018684	0.00269726270901915
pos_114	-8.82164806283621e-05	0.000499186472036625	0.000764679109729846
pos_1140	-0.000342109452100418	-0.000183650225412176	0.000565100583635917
pos_1141	-0.000118867483464226	-0.000371241407190427	0.000781165894750508
pos_1142	0.000397031668657697	3.63051754451048e-05	-0.000541403932327856
pos_1143	-4.74007872670495e-05	8.17456213276793e-05	-8.93894906265012e-05
pos_1145	0.00130364028299394	-0.00117463815262878	0.000365716184355518
pos_1146	8.15254836061787e-05	-0.00165534870727235	-0.00108434467779389
pos_1147	0.000208246003525241	0.000126449959130215	-0.000499614686536643
pos_1148	-0.00071413949654866	0.00350651703298714	0.000882607239441553
pos_1149	-0.000225845795140589	0.000105763163660996	-0.000176299582225345
pos_115	-0.00531339869498207	-0.0129143956838989	0.0103411637693299
pos_1150	-7.98203842719668e-05	-0.000465862339036527	0.00329786124108964
pos_1151	7.34651157778813e-05	-6.09969414622614e-05	-6.74003172302475e-05
pos_1153	-0.000203566587996556	0.000463520692929252	-0.000106273703230051
pos_1155	-0.000292385844147388	-0.00106877431858097	0.000455773386363229
pos_1156	2.72072145901673e-05	-2.16828835780057e-06	3.79564796039847e-05
pos_1157	-0.000664666752068852	-0.00408137856777558	-0.00241292049904077
pos_1158	0.000688165769496912	0.00184972293102095	-0.0113172382897322
pos_1159	6.18642597236189e-05	0.00992553941590469	-0.040018222089048
pos_116	-0.00021876240125629	-0.000144616108497828	9.66675041082643e-06
pos_1160	-0.0038905416624895	-0.00038609737874694	-0.00607686295351027
pos_1161	-0.00159399440271066	0.00543594942819434	0.000364556922632643
pos_1162	-2.83146652714888e-05	-0.000945007402841936	0.000752000174338059
pos_1163	0.000197465563384604	-0.000210494494244541	3.84831812974377e-05
pos_1164	1.00986748207379e-05	-2.47997123573926e-05	0.000147139346707653
pos_1165	1.81588882677926e-05	-0.000105657553765569	-3.99881088391091e-05
pos_1166	0.000177867479502686	-0.000164760355032779	-0.000135897117310907
pos_1167	-0.000166516908363265	-0.000560251802919295	-0.000352929923748719
pos_1168	-0.00305586587027958	0.00161822636320596	-0.00916746782340888
pos_1169	0.000826821150317866	0.000253913761205155	-0.00184037034411176
pos_117	-0.000568490600825388	-0.00419829875092231	-0.00129240689799692
pos_1170	0.000224771971587676	-0.00215455630883884	0.00173955318461198
pos_1171	1.56034793937093e-05	-3.97983859537789e-05	8.98304741354425e-05
pos_1173	1.58954205345654e-06	9.09576657580371e-06	-1.11815799387868e-05
pos_1174	-0.000252045047896568	9.69649424498201e-05	-0.000559896985217583
pos_1176	1.19616199939268e-05	-6.57984151358484e-05	0.000148963035445013
pos_1177	-2.18092837312946e-05	-0.000500895768384954	-0.000735774386913244
pos_1178	-2.80308500017683e-05	-0.000103203241077828	-6.61433628477975e-05
pos_1179	-0.000179678118804784	-0.00090017160820912	-0.000986982011556122
pos_118	0.000504917432461488	-0.00408806341163854	-0.000223418573358291
pos_1180	-0.00170000787981274	0.00379243904894466	-0.00788215115761409
pos_1181	-3.44402845674165e-06	-5.67292115400069e-05	-7.16834894235128e-05
pos_1182	-0.000110475700241576	-1.42839992398142e-05	-0.000473837086262468
pos_1184	1.66898750196403e-05	-0.000128142297091737	-7.15355108136477e-05
pos_1185	-6.29089537606049e-05	-0.000148380551827312	-0.000156649038119885
pos_1186	1.38076892350548e-05	-2.67686863129828e-05	-0.000126339401339865
pos_1187	-5.01834418023057e-05	-0.00134026348644448	0.000350776941716493
pos_1188	-9.25660800790555e-05	2.14138095344746e-05	-2.62229168481949e-05
pos_1189	-0.00026980369517727	-0.000405173996648119	-0.000265871502579342
pos_119	-0.00012249267353547	-0.00124362145019164	-0.0005310234452126
pos_1190	0.000438798378314432	-0.00087861240994186	-0.000371966785861932
pos_1191	0.000137646346940788	-0.000344054227681562	-9.93332787009529e-05
pos_1192	6.45859541525271e-05	-6.81137444059265e-05	9.25011921098417e-05
pos_1193	-3.19533715683726e-06	0.000278603221479051	0.000244604841861789
pos_1194	-0.000399720719661844	0.00193102236995309	0.000360054289541411
pos_1195	-0.000305892170725855	-0.000261987760676823	-0.00117288740728759
pos_1196	-0.0149018703653077	0.0668329508244644	0.0193062609377387
pos_1197	-0.0156902495820422	0.00759501780941339	-0.028802210130858
pos_1198	0.0027223218708227	0.00357661992576186	-0.0222411352581013
pos_1199	-8.10950900163956e-05	0.000297623711740403	-0.00013050021304229
pos_12	-0.000378455802299665	-0.0015843363938263	-0.00234815643641324
pos_120	-0.00329483406991727	0.00770483083845954	-0.00502777199107735
pos_1200	-0.000811948619146461	-0.000598537255498273	-0.000223454034065612
pos_1201	-0.00015538157234875	0.000609649499169723	0.000214096631799243
pos_1202	-1.59982292745957e-05	-0.000399404203660907	-0.000145107956494939
pos_1203	-1.34344541023264e-05	-7.01508641026122e-05	-0.000228926799640871
pos_1204	-2.06259766753598e-05	-3.40699754540213e-05	-3.5463172074756e-05
pos_1206	3.67069305216096e-06	-0.000171448948154035	-7.56659518341237e-05
pos_1207	-0.157007127133107	0.566155889937505	-0.00680961791194577
pos_1208	-3.61422845384675e-05	0.000123042919550599	4.5920767582713e-05
pos_1209	1.5358855760981e-05	-0.000106515452824218	-7.29026727907505e-05
pos_1210	0.00785447728711635	-0.294590358955956	-0.384716754268763
pos_1211	0.000390678508968353	7.71261372810981e-05	-0.00312043567496375
pos_1212	-0.0029358034568183	-0.000720419234599899	0.00277282352829038
pos_1213	-0.00034362240454039	0.00155636743675316	0.000299314194850487
pos_1214	-0.00104792781375822	-0.00107344787852342	0.000432944468441569
pos_1215	1.87789027255071e-07	-0.000782704585575455	-0.000528519006790552
pos_1216	5.16454708971169e-05	-4.14116376806703e-05	-0.000450353195412791
pos_1217	-1.99504753899244e-05	-8.65450200068841e-05	-8.05386244808961e-05
pos_1218	0.012701852147835	-0.0144310967799719	0.0542204352995328
pos_1219	-5.04735662309023e-05	-0.000138666630354643	-4.18409469993418e-05
pos_122	-0.0130150076923881	-0.027262334970028	0.046218789461017
pos_1220	-0.000231510422054154	0.000416687698287525	-0.000179971350331815
pos_1221	0.000175797225760157	-0.00019202851084874	-0.000273204300395644
pos_1224	0.000669181449957844	-0.00144166258626224	-0.000604793581279625
pos_1225	-0.000203064181032527	6.0672038737302e-05	-0.000346124772601287
pos_1226	-0.000874349941388698	0.00399467545709203	0.000610287752523861
pos_1227	-4.36441972337904e-05	0.000245685667773526	3.72429619550039e-05
pos_1229	-0.000147139939080985	0.000137755100315671	0.000407959402981084
pos_123	0.000433125315291899	0.000728851281233308	0.000414905303037535
pos_1230	0.00422986915558041	-0.00038880008306915	0.00691908427314645
pos_1231	0.000466450100209641	-0.00426596109585705	-0.00240081638038594
pos_1232	-0.000323307771049398	0.000713652668703516	-0.0042059312301343
pos_1233	-1.80303630688766e-05	-0.000111203329962387	-2.76614345092691e-05
pos_1234	-0.000323507536535063	5.47922551985967e-05	0.00107203587306468
pos_1235	-0.000267194889125256	-0.000174244150832469	-0.000186723653170683
pos_1236	2.42989345051802e-06	-9.95208592609294e-06	6.85982879226828e-06
pos_1237	-0.00215999366219985	0.00558929811091488	0.00212717028134196
pos_1238	-0.000299897946529482	-0.000600232969305408	0.000389759636671115
pos_1239	-0.000606919118685518	0.00206784998838559	0.000527360413118113
pos_124	0.000923819131402868	-0.00180669085524539	-0.00267660470993044
pos_1240	-8.00885541732892e-05	-0.000543806229883567	-6.83447266539338e-05
pos_1241	-5.09308169879382e-05	5.96761798308708e-05	-2.81370007217314e-05
pos_1242	-0.000141820384992684	-0.000120545991116929	0.00242115178648556
pos_1244	-0.000172510393447702	-0.000363623656852716	-0.000751902300792448
pos_1246	3.9537530692301e-05	-0.000104456341751908	-0.000279488254483148
pos_1247	-3.91920150855778e-06	-0.000139648250935942	0.000117080320020815
pos_1248	-2.91975924690344e-05	0.000172880528551976	-9.53720161415912e-05
pos_1249	2.11008069236986e-05	-5.97653390114072e-05	5.47242033662229e-05
pos_125	-0.00198919711324362	0.00526896271113123	0.00791282687125876
pos_1250	3.27939972968975e-05	-6.01188668549488e-05	0.000296316881948753
pos_1251	-0.0598175417939621	-0.0423375436279518	-0.147542380421414
pos_1252	9.87251184334759e-05	-0.000212796446141404	0.000181443912039368
pos_1253	-0.000957437636002742	0.00236226123214606	-0.0015076820885693
pos_1254	-7.32950674363198e-05	-0.00014204016352504	-8.04788065804192e-05
pos_1255	-1.27903650248046e-05	0.000139615704590246	-0.0001116324664301
pos_1256	-0.000118369116192493	-0.00016085085051634	1.99271334672514e-05
pos_1257	0.00228666842216041	-0.00861419336876762	0.000343912191107923
pos_126	0.000405185585812711	-0.000127534336898801	1.69578886938737e-05
pos_1260	-6.93917827508778e-05	8.04752550523537e-05	-8.13973335476494e-05
pos_1261	-0.000178931747764073	0.000152832955752567	-0.000269208649662003
pos_1264	-6.77882993257152e-05	-8.74721787352994e-05	-3.9909936152029e-05
pos_1265	-0.025600383806242	-0.135763111979369	-0.178625876849037
pos_1266	-0.00072231464334046	-0.00354523356009715	-0.00577981218888329
pos_1267	-1.83519504849046e-05	-1.39299606459593e-05	-2.15880129842411e-05
pos_1268	-0.00146299309592856	0.00816091669756852	0.0012320213611694
pos_127	0.000703006272979952	-0.000752084918067064	0.000908687961383738
pos_1270	9.48633989853146e-06	9.62984100388487e-05	-0.000230426734703653
pos_1271	-0.00279324076668328	-0.00910743839512748	0.0010762860032372
pos_1272	-0.0027460504933652	-0.00369446788703126	-0.0118715323643986
pos_1273	0.000176168519400021	-4.27430505571803e-05	0.000111921527925634
pos_1274	-0.0029989977149951	0.0038597145754939	0.00542440461077773
pos_1275	-4.24536549346117e-05	-0.000262886537214622	0.000269824125558533
pos_1276	-0.000601314974999945	0.000747895709900438	-0.000690437989232713
pos_1277	-0.00203800727733019	0.0175845328314333	0.0094350962041278
pos_1278	0.000365474447019399	-0.00402768948203958	0.00551940281110032
pos_1279	-0.000126775667412392	-2.78883639824979e-05	-0.000220975568980303
pos_128	0.000170514827901582	-0.132971821074204	0.0947963732496985
pos_1282	2.03120380694169e-05	-9.21653399405181e-05	-4.9138807950709e-05
pos_1283	-2.48240647549412e-05	-6.92069387313926e-05	-6.75364709049455e-05
pos_1284	-0.00232218246461112	0.00414501802165946	-0.00189987727185696
pos_1285	-9.1323490038234e-06	-1.38770273401597e-05	-1.14228236507828e-06
pos_1286	-0.000206609392070715	0.000718407276558808	0.000163894491381565
pos_1287	-6.31079535664215e-05	-0.000239718989783157	0.000121112254016465
pos_1288	0.00250813516834694	-0.00162733237740002	-0.00123546401745123
pos_1289	7.70400276093521e-05	0.00021568137846048	-0.000134420729082084
pos_129	0.00424425511598931	-0.000899016461693736	-0.0206082718827773
pos_1290	-2.55935749519744e-06	-3.62259818183851e-05	-4.68136421055546e-05
pos_1291	-0.000461162322104526	0.000652671877351002	0.000465876274325906
pos_1292	0.00349757507722854	-0.005980823242534	-0.0249813617668901
pos_1293	-1.38186833659799e-05	2.4162148486888e-05	-9.30752130333417e-06
pos_1295	-0.000104016508464447	0.000212525719015867	-0.00020585195584834
pos_1296	0.000309454445687489	-0.000392330381858163	0.000587088822580288
pos_1297	0.00312159154145044	0.00199220167120454	-0.0122487693821945
pos_1298	8.97891259449714e-06	2.73451278510204e-07	3.92174214041736e-06
pos_1299	0.000923130161887934	0.000135713276832502	-0.000940624505684826
pos_13	-1.38037887048121e-05	-7.5828809204851e-06	1.42507069509494e-05
pos_130	-0.000436088762080186	-0.00112894073738561	-0.00110714959892515
pos_1300	-0.00193887741050429	0.00569961206693882	0.00171204163354721
pos_1301	2.4382198412587e-05	-0.000235834583885434	-0.000238177499424614
pos_1303	-9.49965786899809e-05	-0.000238756520056717	-0.000158847685623293
pos_1304	3.83734859680409e-05	-0.000435520477926605	-0.000376275915545147
pos_1305	-6.95546754091803e-05	-0.000139429207351771	-0.000115816221382875
pos_1306	-5.7050710649589e-05	-0.00021555347720632	-0.000173835318956787
pos_1307	-0.00665554088058203	0.0114575428647599	-0.00578684791095514
pos_1308	-0.000113838972183555	-4.44348669248169e-05	-0.000340094506775736
pos_1309	-2.48520154808217e-05	4.67991530933652e-05	0.000290672594486718
pos_1310	0.00364457603327336	0.00267274098900687	0.000302994491654204
pos_1311	-0.000208313823434809	0.00070692409340431	-0.000450297956599685
pos_1312	-7.38722848732631e-05	0.000394243905359356	0.000116364245497189
pos_1313	0.000182185995625661	-0.00132583888429953	-0.000648497853496702
pos_1314	-0.000377513446042824	-0.000179089688892312	-0.00133779358895707
pos_1315	-3.99588038285754e-05	-0.000182538717074715	-5.9941527333732e-05
pos_1316	-0.0364630270863316	0.135945876120106	-8.32606156980143e-05
pos_1317	-0.000482341231660326	-0.00104038179598823	0.000826895932085851
pos_1318	0.000216031803724953	0.000329512417217144	-0.00179549852106092
pos_132	7.45998229854573e-05	-0.000496829894833633	0.00119219018928239
pos_1320	-0.00356676892874682	0.00340286412193101	0.00622558604001805
pos_1321	-0.00791215549718887	-0.00781271252478991	-0.0133578902114105
pos_1322	-0.000237886490347226	0.000326647540548446	3.94316046902976e-05
pos_1323	-4.05588724012201e-05	-6.92004092395393e-05	8.77108835085051e-05
pos_1325	-0.0010489889727959	0.00201653838353022	-0.00668080855992068
pos_1326	0.00389573777553883	-0.00230910243465602	0.00732242713009837
pos_1327	-9.77633434100076e-05	0.000471061922067995	2.40045208577735e-05
pos_1328	-0.00119744091942038	0.00500547975727265	0.00848475571416665
pos_1329	-1.1549354344814e-05	-3.69525096041155e-05	-0.000117664995279594
pos_133	-2.47553026872864e-05	-0.000389178848474998	0.00126840895528998
pos_1330	-0.00215706028541275	0.00703008990387911	-0.00020569503174527
pos_1332	-5.23237389501286e-05	-0.00225440934580795	0.00172790491841451
pos_1333	0.000929554821008357	-0.00139239366812797	0.000788397185629509
pos_1334	0.0012944539508572	-0.0127925998977866	-0.00112568185616972
pos_1336	-6.20861027245429e-05	-0.000373337631212844	3.35005870951242e-05
pos_1338	-0.000129941516395466	-0.000289405759503665	-0.000228025962448805
pos_1339	0.000721139305217256	0.00032008694008979	-0.000346117625738984
pos_134	-0.00167113654999841	-0.0035237668859253	-0.00775888971817563
pos_1341	-0.0219107355126917	0.0952413821750013	0.0343237277595381
pos_1343	-6.19093158392205e-05	-0.000170372537079111	-0.000115846915156432
pos_1344	-0.00715618944991109	-0.02237813118697	-0.00798160972386979
pos_1345	-0.000154862770924316	0.000559025873374567	0.000628699307282609
pos_1347	9.92667846999468e-06	-3.88341920410222e-05	2.16477709805518e-05
pos_1348	-8.13021645824704e-05	-0.000207496818740905	-0.000244526722452122
pos_1349	-2.45954746234159e-05	-0.000112731859069844	-0.000165732729063598
pos_135	-0.00119375904183283	-0.000963150338698646	0.00791976875125963
pos_1350	-0.000133048736630653	6.21924549967616e-06	0.00245269173729815
pos_1351	-0.0002686599195511	-0.000289926432313404	0.000878166636839356
pos_1352	-2.80545406927079e-06	-2.19492121502236e-05	-2.23004506120516e-05
pos_1353	0.00042811625369057	0.000188561341836003	-1.91085042372454e-06
pos_1354	-1.74310452313671e-05	-0.000468196198216349	0.000575421551126944
pos_1355	0.00226935009258498	-0.000532281912551244	0.00100420654503772
pos_1356	-0.00012524923968988	-0.000464600238561462	-0.000580673208351093
pos_1358	-2.92476800336278e-05	-0.000467359975151236	-0.000330655650163174
pos_136	-0.0430752080928053	0.0568936160027363	-0.113826813527013
pos_1360	-0.000216672776833775	-0.000386353296810256	-0.000124236941786016
pos_1361	-0.000134470744462471	-0.00162970905255396	-0.00076987400120898
pos_1362	-5.41497283825534e-05	8.35420164530974e-05	-4.89318529722569e-06
pos_1363	3.47464557214298e-07	0.000148768015989018	-0.000466091735253273
pos_1364	-0.000362994883434583	0.00095216029401633	-1.61842541222812e-07
pos_1365	-0.00155440699565674	0.00523592987604258	0.000290910694802211
pos_1366	0.000215996862144271	-0.000758783337196708	1.21342190456988e-05
pos_1367	-1.62740254785084e-05	-5.9573251240358e-05	2.13526643420797e-05
pos_1368	-0.000281219642972193	0.000190064605810651	0.00067039024941611
pos_1369	-9.32651710068163e-05	-0.000118828716240257	-0.000213537727704593
pos_137	-0.000824283304474975	0.00115829439458465	-0.00381548764428274
pos_1370	-0.000137281292046538	0.000270885250064033	-0.000353760394791798
pos_1371	-3.54774484564729e-05	-5.10618836291905e-05	-3.31234805682652e-06
pos_1372	-3.82659702918353e-05	-0.000295162630645011	0.000110884107307309
pos_1373	-0.0147368572506818	0.0550653296011719	-4.5123847794255e-06
pos_1374	0.000443576670541245	-9.81084188353453e-05	0.000351004232686485
pos_1375	-0.00111623285566384	-0.00180994376228718	0.0031764543611034
pos_1376	-6.42862916656779e-05	3.46641147261373e-05	-0.000275037521309977
pos_1379	0.000140247546280241	0.000279266800153592	-0.00257477909906755
pos_138	0.00264969699506861	-0.00777525993721447	-0.0205830063983926
pos_1380	-4.19348568258768e-05	-0.000253508641565236	0.000317421083892212
pos_1381	0.000130516997624071	-0.000423935756713227	0.000171472961177573
pos_1382	-0.000305898393920564	-0.000381323280206576	-0.000339654806502998
pos_1383	-0.00966881264930797	0.0315891538152536	-0.00476947885533106
pos_1385	6.47293948377266e-05	-0.000150299466408042	0.000223138123343518
pos_1386	6.07021687893022e-05	-0.000205580776223618	-0.000701531228630784
pos_1387	-3.34846129310976e-05	-0.000108828003900877	8.52157302272114e-05
pos_1388	2.53690617906095e-05	-1.35364376890594e-05	-6.5133409668193e-05
pos_1389	5.41218686614914e-06	-8.83180312149533e-05	-0.000168880579562662
pos_1390	-0.00198418721650601	-0.00268686056526389	-0.0046029284264756
pos_1391	0.00137089789879625	-0.00237110482884894	-0.000951257782423127
pos_1392	-0.000197856865571125	-0.000754871398033559	-7.6099169362912e-05
pos_1393	0.000133754022775341	-0.000346210063048203	0.000221961033463617
pos_1394	0.000585778401911094	-0.0015670969018582	0.000120135942584518
pos_1396	-0.000126503972607934	-0.00100209180038197	-0.000965167287810241
pos_1397	-0.000359691336949451	-5.07839859430581e-05	0.00197158752496828
pos_1398	-7.41063227178612e-05	-0.000132271797673914	-0.000401269910442556
pos_1399	-0.000258794240765076	-0.000473983526547523	-0.000333579392022744
pos_14	3.265891272038e-05	-3.28970152098418e-05	6.7644098864317e-05
pos_140	-0.00246729578570823	0.00376251836613163	0.00980234864029689
pos_1400	0.0173268478986487	-0.160443536411661	-0.173160173493031
pos_1401	-0.00172134991355402	0.00909916801945922	0.00114910127387338
pos_1402	-0.000129195829840267	-0.00126650543224955	0.000462556720862527
pos_1403	-0.0257970827080549	0.0177492296348847	-0.120863478780085
pos_1404	-1.80713724675813e-05	9.41587061501915e-05	7.14308983892796e-05
pos_1405	3.42595182514733e-05	4.99739565372284e-05	0.000111803123942672
pos_1406	-0.00202642051203276	0.0106108792116942	0.00151681013020977
pos_1407	0.00150008062040739	-0.00182027863083854	-8.59254073666765e-05
pos_1408	0.000723908912940223	-0.00227505791828364	-0.0026717508982643
pos_1409	-5.06357520586013e-05	-0.000141024018858484	-0.000150023211572393
pos_141	-1.92685651745383e-05	-8.87304283231601e-05	-2.29353784717403e-05
pos_1410	1.91595056064167e-05	-0.000172073147524979	-0.00101478596165541
pos_1411	-0.000283030592845778	-0.00107604496674669	-0.000322894204960445
pos_1412	0.00124846619211177	0.000441065342951246	-0.00245867802232911
pos_1413	2.41150212858914e-05	-0.000229285877246446	-0.000194095149519222
pos_1414	-1.44819107350021e-05	-9.84881982156899e-05	-3.70631080165006e-05
pos_1415	6.96966405549278e-05	-8.86666079594987e-05	2.17195648564929e-05
pos_1416	-0.000168896612448991	-8.81818964996919e-05	-0.000270687608859447
pos_1417	-0.0196992839900494	0.0469077054858941	-0.0232233098010488
pos_1419	-2.91162733480249e-05	-1.82949577359733e-05	0.000176951567023024
pos_142	-0.00019886351488296	-0.0013850063580965	-0.00124984792796251
pos_1421	0.000103712197268799	-0.0234527589705282	-0.0161524251636951
pos_1422	3.56446513019085e-08	2.54506546735633e-05	-8.23755802007497e-06
pos_1423	-0.00173612648829028	0.00572079364245573	0.000156099237848268
pos_1424	0.000162062551785321	-0.000180948288688208	0.000222307375941464
pos_1425	-0.00416807462911402	0.0109782911872601	-0.00084924722804991
pos_1426	-5.5188323187125e-05	4.34228111080265e-05	-9.58539950123852e-05
pos_1427	-0.000211546576983828	-0.000703194893281357	-0.00109076101242784
pos_1428	-0.00151450763597451	-0.000945159971778025	0.00315870368240635
pos_1429	0.000152875410951652	-2.35464520984703e-05	0.000134028050908414
pos_143	-8.0370215058021e-05	-0.00052170027218605	-0.000482847067694641
pos_1430	0.000199441770156598	0.000268272200440667	0.00125769665580934
pos_1431	0.000142032699439889	0.000276339769588974	-0.000972686874855013
pos_1432	0.000165852880871596	-0.000326972391782014	-0.000367739524894079
pos_1433	-0.000651145176021293	0.00838790962606875	-0.00307062895122016
pos_1434	-0.00472519841072408	0.00838340457165165	-0.0242671081292341
pos_1435	8.12049518250968e-05	7.73997835919317e-05	-0.000341796834667731
pos_1436	0.000161412090914452	-0.006274552314951	-0.00777478854626299
pos_1437	-0.0184671775222305	-0.0234401700332359	-0.0443736492667062
pos_1438	-0.00107550875887527	-0.00129976307152296	0.000172090761571622
pos_1439	-0.00110734362210443	-0.000780121494489754	-0.00198953490395132
pos_144	-7.55538487929938e-05	0.000122596385738758	0.000221223049952763
pos_1440	-2.15852742239676e-05	-0.00012509718874189	-3.69190003506719e-05
pos_1441	-0.000282514958717226	0.000897479533407589	-0.000205423929016577
pos_1442	-0.000339731437910751	0.000415619793037292	-0.00320803554051886
pos_1443	8.16814330615639e-05	-0.000132516711512969	0.000906859178601718
pos_1444	-8.04131369976163e-05	-0.000750368394340118	-0.000305574804846089
pos_1445	-0.00477017980712884	0.0202871048625322	0.00971116941721215
pos_1446	-0.000118758554086699	-9.20126891986162e-05	-0.000611786881052076
pos_1447	-0.00788986082300919	-0.00354173075915485	0.0569637127054988
pos_1448	0.00053346703807947	1.93275640660041e-05	7.35089673555545e-06
pos_1449	-0.00130849507062491	0.00128176446428482	-0.00183007058181546
pos_145	-2.24561639812129e-05	-0.000127350275006082	-0.000270037070242499
pos_1451	7.34215229913364e-05	2.77889455467305e-05	-0.000421910993837686
pos_1452	-6.04132703582207e-05	-0.000199888341876452	6.56560559723239e-05
pos_1453	-0.000162527570784606	0.000216728248512484	-0.000109618934590157
pos_1455	-0.0191293660341973	0.081313597986739	0.0246908989714026
pos_1457	-6.40451045878649e-05	-0.00030797705303236	-0.000343915050099319
pos_1459	-0.000158635563345568	0.000220467106353372	-0.000529030134814094
pos_146	-0.000182854824056664	0.00199143016038521	-0.00252566669175182
pos_1460	-0.000254503437159406	7.77234975412572e-05	-0.000157748774489163
pos_1461	-3.70406608483237e-06	-3.60845547946124e-05	-3.96947846463629e-05
pos_1462	-0.000447154277739005	0.00144922083085927	-0.00108141016773434
pos_1463	-6.45645793111718e-05	-0.000509969582025562	-0.000578531618434413
pos_1464	-7.34681864401878e-07	2.43573093299761e-05	9.34826632052593e-05
pos_1465	0.000355454614033308	-0.000311459293277707	-0.00255881004464343
pos_1466	9.38970919551436e-05	0.000198412989784358	-0.000878306429392105
pos_1467	-1.67743212286959e-05	0.000100575344448001	0.000204176625858943
pos_1468	-3.48914914162433e-05	0.000124872423344421	-3.91732818965305e-06
pos_147	0.00115709292558697	-0.000490919784488621	-0.00298487919329431
pos_1470	-0.000120395962443246	0.000360810772757772	-7.67933817351316e-05
pos_1471	-0.000157750759914443	0.000186903781469186	-0.000220882626431525
pos_1472	-8.98190207692378e-05	-0.00168789443882135	0.00243011373177546
pos_1474	-0.00128111287773729	-0.000412278221790251	-0.00196540249829875
pos_1475	0.000256784895168109	-0.00086854052014968	0.00283384010598318
pos_1477	-0.00019215354890408	-0.000106313879372427	-0.000739046289245963
pos_1478	0.0110098547663236	0.00623417680635076	-0.00161431445793794
pos_1479	2.30675208176963e-05	-3.81620093909552e-05	-2.9910302587436e-05
pos_148	-0.000139360936966406	-0.00056487328737188	0.00120445518416279
pos_1480	-1.04294637583583e-06	3.7765714390276e-05	-9.16346288367961e-05
pos_1481	7.75444586247672e-05	-0.000111253453894089	0.000103204768226601
pos_1482	-5.52289400811856e-05	-0.000169076249491331	9.39870032421545e-05
pos_1483	1.39104879744207e-05	-5.28458809154011e-06	0.000101906426599945
pos_1485	-0.00452111069488169	0.0057474134134017	-0.00435554649723799
pos_1487	-2.17110814329221e-05	-8.73455388190889e-05	-7.96496394093745e-05
pos_1489	-0.00467376337290577	-0.0267660142678528	-0.00442788040539232
pos_149	-0.00018957171285969	-0.000674741985348553	-0.000640661241645124
pos_1490	0.000466662275964125	-0.00031578854208159	-0.000461306689282316
pos_1491	-1.42523472351757e-05	9.60833614621273e-05	-6.03417761737413e-06
pos_1492	6.26073173288986e-05	-0.000377914114951393	5.49604774582994e-05
pos_1493	-5.18869082980473e-05	-0.000159754255141981	0.00017109195708536
pos_1495	-0.000196848099088103	-0.000351687763960833	0.00142242020885786
pos_1497	7.07802154361619e-06	0.000119354833574553	9.15633596309189e-05
pos_1498	-0.00723413692761805	0.0270668180173631	0.00102641516731572
pos_1499	-0.00102459602140171	-0.00116099533429515	-0.000299987959526699
pos_15	-0.00383773095842431	-0.0029122020521705	-1.60682908598716e-06
pos_150	-0.000619200423533605	-0.00806490644634402	0.0109609176411668
pos_1500	-0.00126267989534939	0.00646474191028654	0.00104140151970762
pos_1501	0.00142342336698114	0.00914550572181829	0.00766780420434878
pos_1502	-0.000340080499581068	-0.000983677086202697	-0.000926466118457853
pos_1503	-0.0069147795763516	0.0231029167744472	-0.00100661818397895
pos_1504	-3.57811477147318e-05	-0.000736196823394959	-0.000150011381483951
pos_1505	-0.00160839741756106	-0.000895030928898801	0.0104982672809992
pos_1506	-0.00333347026154435	0.0106319588701751	-0.000206184239545111
pos_1507	-0.00494024997997092	0.0153190144595187	-0.00163575655048827
pos_1508	-0.00293987100690001	0.00707855929339623	-0.00352721103818627
pos_1509	-4.23259926376765e-05	7.11604025598256e-05	-8.52743463558018e-05
pos_151	0.00146539770410963	-0.00438974827087579	0.0151252402220674
pos_1510	-0.00146950914442194	-0.00328150655201743	-0.0047636237543267
pos_1511	-0.00173048849508946	0.00955063555986237	0.00166436791615275
pos_1512	-0.00320859122789385	0.0165576963769956	0.00636940584837797
pos_1513	-0.000702187562955074	-0.000144331434124223	-0.000920155437735511
pos_1515	-0.000169759603107587	9.5222292685699e-05	-0.000244557389788729
pos_1517	-4.08026024691014e-05	3.40984159134512e-05	-5.39845768315867e-05
pos_1518	2.19767963383297e-05	-9.22556484910603e-05	6.00317365430561e-05
pos_152	-0.000377130435955023	-0.000342886630514869	-0.000996841480284469
pos_1521	-0.000473061720744485	0.00725028239667784	0.00406615342377552
pos_1522	-6.81782857586366e-05	0.000464680071824526	-1.11283599747139e-05
pos_1523	-0.000578412015633514	0.0010193007321556	-0.00249534680684141
pos_1524	0.000206181170155244	-0.000136783077921108	-0.000134192929140605
pos_1525	-4.57590643506306e-05	3.08573862460341e-06	0.00013657195185614
pos_1526	-0.0111308724100246	0.0471139699453528	0.0137164608955438
pos_1527	0.00272699964712652	-0.00511646172977998	-1.2247407707028e-05
pos_153	-0.0194711167747628	-0.0041213599609658	0.00547057430461727
pos_1532	3.23443943708625e-05	6.97264007763264e-05	-0.000240436676645731
pos_1533	-0.00204896915879643	0.00398230681065445	-0.00424575063398192
pos_1534	-3.97331631124993e-05	-8.86104307626748e-05	7.61979023182502e-05
pos_1536	-2.09025958708767e-05	-0.000504150524230249	0.00181395638923774
pos_1537	-0.000291438083770113	-0.000203263706814199	0.00118089028584363
pos_1539	-1.11411241617838e-05	-8.89973502866872e-05	-0.000102630263000599
pos_154	0.000370462196826748	-0.00035826184630933	-0.000224377243669074
pos_1541	-0.000530280464478398	-0.00255589737453413	-0.00262192561054543
pos_1542	0.0213469403563773	-0.00362435914855737	0.0118823896215793
pos_1543	-0.00138903265503835	0.00396585998393103	-0.0013688531284564
pos_1544	0.000485089001938847	-0.00151972608856996	-0.000275561444367423
pos_1545	3.00884420211132e-05	-5.76792188414049e-05	-0.000277661081987072
pos_1546	2.08471001543039e-05	0.000128336528778661	-0.000109019025308838
pos_1547	3.7600211032254e-06	-0.000116120917792855	-6.7000242927878e-05
pos_1548	6.03886078366876e-05	-2.43052517177291e-05	3.38832758585124e-05
pos_1549	0.00204736594122291	-0.00375314943297801	0.00867221414777523
pos_155	6.38047135824193e-05	-0.00212121672768433	0.000840173513199287
pos_1550	-5.30464218933748e-05	-0.000327684740615014	-3.09643386931353e-05
pos_1551	-1.96510463669101e-05	0.000126685324596696	8.15238201866998e-06
pos_1552	0.0010840639585112	0.000604861580065957	-0.000546923014149552
pos_1553	-1.81246810495552e-05	-0.000119177152693974	-0.000185275507493496
pos_1554	0.000253518996927525	0.000363942743259553	-0.00128319237337276
pos_1556	0.000201891200930959	-0.00049228100359806	-0.000134713555468062
pos_1557	1.77134513857844e-05	4.31829801894317e-05	-8.45361803374559e-06
pos_1559	-9.360034089145e-05	-0.000358406997576841	-0.000999401967852286
pos_156	2.51729197288285e-06	-4.44757382407203e-05	4.34426931781774e-05
pos_1561	-2.13172190164956e-05	-9.62223052502533e-06	-0.000252537764918311
pos_1562	2.74001440507926e-05	-0.000561737104798666	-0.000616694964782844
pos_1563	7.299690599675e-05	4.09966760026207e-05	-0.000202430542958952
pos_1565	-0.00114426830434452	-0.00244040041458444	-0.00282740352642156
pos_1566	0.00021693852649255	-0.000501103688604718	0.00165902557471385
pos_1567	-0.000410303006166727	0.00234337272278954	0.000461663485549255
pos_1568	0.000760933918214279	0.000221185042580791	-0.000647111860420398
pos_1569	-0.0189150729562547	0.0825668048470544	0.0254937965135174
pos_157	0.00314613638495419	2.75687919405298e-05	0.000710940207102443
pos_1570	-0.000327210270696391	-0.00100970607009296	-0.00103716673448696
pos_1572	-0.00218390155303242	0.00728986027170751	-0.00598306838990977
pos_1573	-5.73242167101987e-06	-3.48388617464653e-05	4.88904122638695e-05
pos_1574	-1.29020010808267e-06	-0.0015230850704919	-0.00228996755554117
pos_1575	6.70086958952753e-05	-0.000150137977074792	0.000159683045932874
pos_1576	-1.62498184776927e-05	-0.000523875278104929	0.000235120624705705
pos_1577	-9.8856651390291e-05	-0.000241456304917646	0.000345232272101532
pos_1578	2.12465316436339e-05	-9.37993474248951e-05	-0.000170253994971498
pos_1579	-0.00118570549180365	0.00411861534917958	0.000363661175015254
pos_1580	1.69515758577639e-06	-3.22137631036931e-05	-0.000123488296060495
pos_1581	0.000317758668818589	-0.000395163581367463	0.000630623200828552
pos_1583	-0.000448426962542173	0.00203007133388379	0.000147687597488727
pos_1584	3.31249264281816e-05	-5.63298819503521e-05	1.30331794447248e-05
pos_1585	-0.000165411093601569	-0.000503792629496057	-0.00038335729661775
pos_1586	8.27842385693237e-06	8.85350419532076e-05	5.57411373626502e-05
pos_1587	0.0648113353496171	-0.0658978784241559	0.00135178615364495
pos_1588	-0.00141027858696914	-0.00693218450158924	-0.00912220889988691
pos_159	8.45063044177448e-05	0.000966240248109034	0.0021666586741479
pos_1590	-0.000281476348342752	0.000860750533915921	0.000255465649315417
pos_1592	-0.000338018048697558	0.000162970200698165	-0.000538087104348033
pos_1593	-0.0141833307343371	0.0418638665386853	-0.00795218094947965
pos_1594	1.79298700687362e-05	-5.79388700659953e-05	0.000180106706924932
pos_1595	-0.000145575272778205	-0.00040783117624947	-4.44278102879055e-05
pos_1597	-0.000116896121867731	0.000460390054315402	-5.34048316374414e-05
pos_1598	-2.29210082549719e-06	-0.000119722807944921	-6.80189904272466e-05
pos_16	-0.000609756044129566	-0.000863062934333779	-0.000796866783743295
pos_160	9.02602220956948e-07	0.000303424635418318	-2.34320823878708e-05
pos_1600	0.00505060363053802	-0.0111016606168789	0.00659301109171666
pos_1601	-4.71509109332841e-05	-0.000120560261600061	-9.51439654754437e-05
pos_1602	0.00204755806651495	-0.000742625236287034	0.00950221532965417
pos_1603	-3.80789764896361e-05	1.97322221528675e-05	8.60407780670961e-05
pos_1604	-0.000730535710201167	0.00192499369072632	-0.000139884759220617
pos_1606	-8.32148655265754e-05	0.000150420967621862	-9.98021390824613e-05
pos_1607	-0.000183428508263885	0.000575569762790197	-1.35469433239672e-05
pos_1608	-0.000105375533599489	-0.000373042752358409	-0.000422661170865578
pos_161	-0.000119263131028512	-0.000192384028073425	0.000233159657914612
pos_1611	-7.01146457794446e-05	0.000200868813558596	-3.91005530931593e-05
pos_1613	-0.000614552586970729	-0.000310795158892674	-0.0011980082658616
pos_1615	-2.57938767191774e-05	-0.000246800301782193	-0.000316364234281695
pos_1616	0.0024680036821082	-0.00255804649897787	-0.00128742539202686
pos_1617	-6.18306415894102e-05	-6.11300234901057e-05	-6.80358997536629e-05
pos_1618	-4.6761488671405e-06	-1.71738584639644e-05	-2.86647620073555e-05
pos_1619	-2.04756055630612e-05	0.000131311710793764	5.89643316143993e-05
pos_1621	-0.000373631568792984	0.00135048290052312	0.000525332578144112
pos_1622	-0.000157911160530339	-0.000228888818275228	-0.000728625461086418
pos_1623	-0.00043170010274092	0.000104424088106332	-0.000611518571296215
pos_1624	-0.000526275716610139	0.00106429247963097	-0.000197213666944425
pos_1625	9.70762160204459e-06	-0.00027283861138276	-0.000393524699546065
pos_1626	-0.000188236253161887	-0.000367098612187016	4.98543023937286e-05
pos_1628	-1.05312001304106e-05	0.000117496785239682	0.000108421053713216
pos_1629	-0.000234256283504365	-0.000922708485507656	-0.000900677537687253
pos_163	0.000232237358249174	0.0008629254678654	-0.00276307062994184
pos_1630	-0.00228376831193691	0.0016191981865887	-0.00355899177273549
pos_1631	-0.000131587926443171	2.48160544611124e-05	-0.00024146525541028
pos_1632	-0.0682102752817497	0.206428490871806	-0.02652303057518
pos_1633	-0.000271164925237162	-0.00101813653604125	0.00414846957776277
pos_1634	-0.000145193322924998	0.00203328679594172	-0.000706405543913931
pos_1635	-0.000333473382708311	-0.000149429790358126	0.00110212579481801
pos_1636	-0.000442771083143693	-0.000427107440658545	-0.000355110082949359
pos_1637	-0.000924068246200166	-0.00467556808962076	-0.000776593583315844
pos_1638	-3.43299248776993e-05	-3.59687105078905e-05	-0.000183067500206725
pos_1639	1.11798171453923e-05	-9.76216063438745e-06	-1.09013564018083e-05
pos_164	-0.000522487167913524	-0.00061861592385317	0.000618380725147746
pos_1640	0.000629206430292385	-0.0010826276723598	-0.00112644775945536
pos_1641	-0.00249612612358983	0.00954342869742039	0.00593784934188098
pos_1642	-0.000152544658993226	-0.00146321762201541	-0.00105377302445138
pos_1643	-0.00290910046901569	0.00156783951566196	0.0259988524987987
pos_1644	-4.54806199442697e-05	0.000347679443893741	0.000509915172308788
pos_1645	-0.000584914225969007	-0.000937530619362472	0.00563250554531162
pos_1646	-0.000495762601692623	0.00202812028503558	0.000340648052481783
pos_1647	-4.19785245817065e-05	0.000227959426484714	3.73398930157097e-05
pos_1648	-0.000437178421469166	0.00128744277190762	0.000309755893581348
pos_165	-0.00101467959544197	0.00269131728129227	-0.000613304267103475
pos_1650	-6.6119249324032e-05	-0.000282227981840419	-0.000122743053500864
pos_1651	-4.82672044336848e-07	-4.91731578689081e-05	-6.53173223432141e-05
pos_1652	0.000291972947667858	-0.00111308588297177	0.00120542643748199
pos_1653	-1.97088953799493e-05	3.51288935473209e-06	-0.000171981800308225
pos_1654	-7.58032073737778e-07	-0.000104518434399655	-7.81770105993381e-05
pos_1655	-0.000177416437885845	-0.000265425140457503	-0.000249246755945484
pos_1656	7.77522782245789e-05	-0.000153608696088318	0.000759178658510562
pos_1657	-0.00134532950205942	0.00404819981672647	-0.000181627108882313
pos_1658	-0.000253719045194029	0.000485751810770327	-0.000347744449091181
pos_1659	7.38490332782876e-05	-3.90616772994793e-05	-0.000143095127654462
pos_166	-0.00568713106551216	0.0021468400334638	0.00336704494203023
pos_1660	0.000835622308138615	6.92773468040794e-05	0.000249908422871211
pos_1661	-9.16503868340737e-05	0.000498558833126977	-2.13012767434154e-05
pos_1662	-1.12286908793627e-05	-3.71576098325544e-05	-3.50839683863442e-05
pos_1663	3.83275214907988e-05	-0.000788418678739136	7.88094736533072e-05
pos_1664	0.00232477917948624	-0.00195020922416113	0.00106611668855659
pos_1666	5.53690513639229e-07	-0.000239395147670036	0.000261043290927305
pos_1667	-0.000179724473856043	-0.000892969030552509	-0.000375988054251774
pos_1668	0.000196353349493991	0.000518501888684911	-0.00164943569508558
pos_1669	6.81587964030036e-06	-0.000198552253615951	-0.000258298567032249
pos_1670	4.80724596688858e-05	-8.5742047276122e-05	0.000199774007030103
pos_1672	-0.00110690973505839	0.00608700655553141	0.000764693846847277
pos_1674	-3.54228156419356e-05	-6.01426913303293e-05	-8.85607441878323e-06
pos_1675	-1.20425565301072e-06	-1.28714495534886e-05	-2.80189025073671e-05
pos_1676	-0.00512869625148905	-0.00148089670398985	0.0144146729203916
pos_1677	-0.00222377363479268	0.00345409756072319	-0.00420962566411484
pos_1678	0.0109650108223774	0.0163385746670529	-0.017410950297701
pos_1679	-2.2124957398295e-05	-0.000721702219511936	-0.000860393244401811
pos_168	-0.00028914461679843	-0.00107778243978002	-0.000666879441698853
pos_1680	-0.000197687855093772	0.000720607300848159	0.000160576076678076
pos_1682	-6.61493131251989e-05	0.000322732552428	-4.8245615155624e-05
pos_1683	2.30435624255987e-06	-1.42211630847447e-05	-3.52262771486818e-06
pos_1684	-0.000711304237422497	0.00242685596187269	-8.45109144360755e-05
pos_1686	-3.35294035349579e-07	7.6422252389077e-06	-5.48607724748773e-05
pos_1687	-0.00163347395465724	0.00855614611609328	0.00125143003190837
pos_1688	6.36168800005876e-06	-2.48040433734013e-05	-3.57531917053907e-05
pos_1689	-0.0008422404550006	0.00151200419577959	-0.00222031241408313
pos_169	-0.000590970959828666	0.000965496309920522	-0.00281779185625019
pos_1691	0.000399276790009167	-0.000341895299378183	4.05942751669159e-05
pos_1692	-0.00158734895622037	-0.00317585919235903	-0.0020277574065289
pos_1693	-0.000193047693887767	-0.000811786346814471	-2.38674423043313e-06
pos_1694	7.21589830016301e-05	-6.15129868452026e-05	-0.000143910359838149
pos_1695	-0.000182357171687924	-9.87342185459238e-05	-4.38961912245551e-05
pos_1696	1.66067924263123e-05	1.5680796272002e-05	-4.6944685836244e-05
pos_1697	7.01854393613841e-05	0.000256805669925271	-0.00200807956755692
pos_1699	-1.4249319999904e-05	-2.81371047431684e-05	-7.72202967186268e-06
pos_170	-1.90290386438128e-05	-0.000173432258500998	-0.000295952510271706
pos_1700	1.20938434643738e-05	0.00019187750578402	-0.00014619516764261
pos_1702	0.00338772041423795	-0.00151611657189243	-0.00698135986255725
pos_1703	-0.00194636338544274	-0.00215401050822944	-0.0022370192635678
pos_1705	-0.000217110204106949	-0.000253144452527876	9.00565071207232e-05
pos_1706	-2.46717274001106e-06	0.000228074833302493	7.75961889649589e-06
pos_1707	-6.41199678609811e-05	0.000377289123385687	6.90386934491854e-05
pos_1709	-0.000124214032882355	0.000264728824478036	-0.000292691597385955
pos_171	-0.000900597269165093	0.00144164262937132	-0.00348020000486198
pos_1711	-0.0017437106292766	-0.00301180412645468	-0.00351448381515284
pos_1713	-5.61275008920767e-05	-3.64489138778861e-05	4.00005161615826e-05
pos_1714	-0.000120277103942736	-0.000200369597788961	-0.000436676088508506
pos_1715	-8.91583371129922e-05	0.000201196235500626	0.000151531256873292
pos_1716	-0.000200866592293901	9.52048312386446e-05	-0.000108751562817936
pos_1717	4.21774244622596e-05	5.5646041351576e-05	0.000308848055814779
pos_1718	-0.000765768844644928	-0.00168612756832404	-0.00159350783068253
pos_1719	-9.37818683585733e-05	-5.7138531375548e-05	-5.49035958926708e-05
pos_172	1.29826251729429e-06	-1.5991882726001e-05	-3.82014674619999e-05
pos_1720	3.61803362749118e-06	-0.000139934847063101	0.00023212307008506
pos_1721	-1.62041567228021e-05	5.46100257114942e-06	9.81291810917998e-06
pos_1722	-0.00411326179621607	-0.0118946800061824	-0.0147602390905749
pos_1723	-0.000571172368458471	-0.00459826651438926	-0.00502343065120567
pos_1725	-8.3574472997774e-06	2.2819382094585e-05	9.7909803089308e-05
pos_1727	0.000747920576102455	-0.0010724526244953	0.000329741381346537
pos_1728	-0.000160252218178757	-0.000330435168490752	-0.000385390388566449
pos_1729	-0.00189635883301514	0.0107374793795879	0.000790405975399699
pos_173	0.000698881388401314	0.000353309291309697	0.000896082496360918
pos_1730	-0.00115591068614744	0.000472369782031246	-0.00190123248911332
pos_1731	-9.35802267415977e-06	7.73946130770342e-06	-2.95485512421879e-05
pos_1732	-0.000415168876158492	-0.000794219749342849	-0.000754411052631189
pos_1733	-8.98757438516521e-05	-0.000968300501022153	-0.000508486163700761
pos_1734	0.0012804152061744	0.000455171240445251	-0.00747675357416675
pos_1736	-0.00024185717231521	8.20552304867017e-05	-0.000317439513645525
pos_1737	0.000626199031168739	-0.00090504509680632	-0.000870108309236236
pos_1738	0.00112991824994743	-0.00142497872537193	0.00117500379770308
pos_174	0.00211790898321659	-5.13179074220273e-05	0.00028451828866579
pos_1740	0.000859381549807716	-0.000785791502547905	0.00357500697178295
pos_1741	-9.26790402921755e-05	9.68334571709636e-06	-0.000156117002475483
pos_1742	-8.54130313802526e-05	0.000480275361289626	-3.42691639440878e-05
pos_1743	-0.00153414722828423	0.00808984209131238	0.00133666561114931
pos_1744	-5.22236717169776e-05	7.41633222926292e-05	-2.49472776160792e-05
pos_1745	1.30873291975908e-05	-0.000208551620082767	-0.000128790136566873
pos_1746	-9.00614006736602e-05	0.000102636130438781	-0.000219947641423563
pos_1748	0.00801682137816118	-0.0152107373818145	0.0093817860577955
pos_175	0.00163867382329746	-0.000282068758408312	-0.0022174439111675
pos_1750	8.4042254934414e-05	-0.000434632123740477	0.000184400052428791
pos_1751	-0.000859255060227614	-0.000282870615338662	0.000675719383931468
pos_1752	0.000831770498235493	-0.00036252905082768	0.00256609681153446
pos_1753	0.000182633077452757	-0.000207468767416726	3.90669394536898e-05
pos_1754	-1.48932829500388e-05	-7.99688997657047e-05	1.40750887695387e-05
pos_1756	2.73374562167274e-05	-0.000544192553994923	-0.000513964243360791
pos_1757	5.11805688377849e-05	-0.00104931130090742	0.0016800479431918
pos_1759	-0.000507538893354568	0.00278680289192158	0.000619760142661952
pos_176	-0.000744497736508752	-0.000426445530096642	0.00225664823122819
pos_1760	-0.000501994671466715	0.00239217352796946	0.000241193849261344
pos_1762	1.65268522299309e-05	0.000119612819161228	9.21249060291254e-05
pos_1763	-2.87812654930995e-05	6.22342458072366e-05	5.1843872658176e-05
pos_1764	0.000100899247487596	-0.000263188737296072	0.000177050834868283
pos_1765	0.00843993393575353	-0.00463776513503478	0.0171929715367041
pos_1766	0.0394582657591241	0.00179572990865465	-0.00983443731364477
pos_1767	-0.000722829146961629	0.00443117659715761	0.000746458118716781
pos_177	-0.000448832745595989	0.000684750326089215	-0.00221964869226255
pos_1770	6.61366530211901e-05	-0.000112115260122785	7.58379236114875e-05
pos_1773	1.25152381498874e-05	-1.77855299544336e-05	-0.000266426245109766
pos_1774	-2.59617380416316e-06	-4.86829105540514e-05	-7.25942391068642e-05
pos_1777	-0.000366139403797743	0.00220517529593504	0.000500381904818144
pos_1778	3.47693529719688e-05	-0.00012807785640662	0.000262189286042279
pos_1779	-0.000170611049549136	-0.000279254272381124	-0.00028822454788627
pos_178	0.00198662066967706	0.002068303769916	-0.0165339371605323
pos_1781	-0.000179538952810786	8.29213450309628e-05	-0.000636959622842184
pos_1782	-9.59861643662029e-05	0.000419215839067606	0.000123370181291643
pos_1783	-0.00138548386218577	0.00623240800549019	0.000373587481225652
pos_1787	-0.00405641584718592	0.0105639786264332	-0.00153243013032023
pos_1788	-0.0132785534823417	0.0511178319256147	0.00605416139560863
pos_1789	-0.00866602187761655	0.0303194121601687	0.00495872714095836
pos_179	8.08851751075371e-05	0.000273034987620632	-8.06110103152078e-06
pos_1790	-0.000108844803084335	0.000181150001090386	-8.3562050147968e-05
pos_1791	-0.000547280443501806	0.00323851292566357	4.25948235188713e-05
pos_1792	1.70665513268537e-05	-1.13819002784672e-05	-4.00080434794384e-05
pos_1793	-5.28986074835689e-05	0.000260675407138153	0.000135689621750225
pos_1794	-0.00292400577273437	-0.00680840453610969	-0.0095400652518702
pos_1795	-0.00166550694159538	0.00501813056130563	-0.000292294967766477
pos_1796	0.00280034493160707	0.0312150223795192	0.0139564727659661
pos_1797	-0.000139008446006752	0.000262883658047969	0.000135006784927447
pos_1798	1.74309312020932e-05	-6.2966935689169e-05	-6.19154698518917e-05
pos_1799	1.82858331931758e-05	-7.16159483952283e-05	-0.000140636208233459
pos_18	-6.37831852775584e-05	0.000286541934322303	0.000235669486544392
pos_180	0.000142312199195791	-0.00144385955438233	-0.00113627608621954
pos_1800	-0.00029250091660855	-0.000659255383983465	-0.00102451132789348
pos_1801	-9.24665209241302e-06	-3.45350699224891e-05	-3.91044223670598e-05
pos_1802	-0.000127554251329912	-0.000257441186241009	0.0001213338720802
pos_1803	8.44414454977793e-05	6.46042537721995e-05	-0.00110564458893162
pos_1805	-0.000424343365214439	-0.00104686760623131	0.000697294193194494
pos_1806	-0.00153991306218288	0.00477032970992259	-0.000775960750445445
pos_1808	-0.00103997687890938	0.0054320626486814	0.00076225041032052
pos_1809	0.000106362438964333	-0.000425028369712671	-0.000488628635412351
pos_181	2.01827060861101e-05	-0.000185426058303117	-0.000661218457356007
pos_1810	0.000166176495689701	-3.02951130742376e-05	0.000172322640386527
pos_1811	-6.70031613361128e-05	-0.000162507922382852	-0.000178062390691277
pos_1812	-0.000361976709077102	0.000312813266022626	-0.000762921433972942
pos_1813	-5.20179098779673e-07	-0.000758068990737944	0.00212962480487817
pos_1814	-7.43756636482452e-05	6.52265227722415e-05	-0.000151983083865977
pos_1815	0.000499355124796775	0.000554931289216801	0.00172287077347601
pos_1817	1.07397628713522e-05	-0.000192088998200424	0.000200823846590368
pos_1819	0.0004774003972008	-0.000123346179740203	-0.000523578523604482
pos_1820	-0.00142507102816593	0.000999730740388769	-3.36784775186634e-05
pos_1821	-0.000296545827896569	-8.12298632612062e-05	-0.00129388167304471
pos_1822	0.00226629944889779	0.000660347031315428	0.000336176452477009
pos_1823	-9.72302257615309e-05	-0.000350163956536753	0.000466265270590187
pos_1826	-0.00162155258161851	0.00417053604621029	-0.00143226154114369
pos_1829	-9.55155971093117e-06	-0.000273431637539053	0.000146676402790782
pos_183	-9.45470861465393e-05	-0.000364533939876513	0.000322271844978402
pos_1830	0.00472384945082276	-0.0106174043956175	0.0235961166015056
pos_1831	-8.91611176463257e-06	-4.35678586564113e-05	-3.37413505613258e-05
pos_1832	-0.00192596382569495	0.0101423731720262	0.00167329263151554
pos_1833	-0.00033708851255999	0.000487984407024126	-0.000538474094796129
pos_1834	1.89135448407649e-05	-1.26364812642593e-05	-9.82220166840398e-05
pos_1835	0.00024697230897357	-0.000109149722061509	4.69335703073932e-05
pos_1836	0.000954507113846791	-0.00166282723347587	0.000950919781868591
pos_1837	2.18635118657052e-05	-8.99131557357524e-05	-6.61830388059087e-05
pos_1838	-0.000922190587339627	0.00273981122197304	-0.000621793257322802
pos_1840	1.34534905717186e-06	5.40368467201416e-05	-2.4646132930573e-05
pos_1842	-0.000211005831311463	0.000393403652962407	-0.000170662566876089
pos_1843	-0.000188148250558666	0.000954085911025718	0.000185928653848526
pos_1844	0.000783101932599501	-8.03357325106834e-05	-0.00494229164669082
pos_1846	2.52817329738188e-06	-3.54652900831403e-05	9.34311340009487e-06
pos_1847	1.24523222403536e-05	-4.53949996876839e-05	-4.91518465811346e-05
pos_1848	-0.00162532008914972	0.00587691615118361	0.00174417717021748
pos_1849	0.000532364754638389	-0.000300985445826739	-0.000345175628138642
pos_185	-0.00288276089059258	0.00868662410646008	0.00442312377972934
pos_1850	-1.58000774207332e-05	-2.99868376242637e-05	7.49966650967526e-05
pos_1851	1.21556131381513e-06	-0.000387224346850329	-0.000323379085436062
pos_1852	0.00057067048042396	-0.00238882970647716	-0.00433953410886793
pos_1853	-7.75034185050656e-05	-3.01513406679728e-05	-0.000547498105166559
pos_1855	0.00159057159400973	0.000273575956430472	-0.000324724479578671
pos_1856	-0.0010396324625789	-0.000252548077812688	-1.23331491420814e-05
pos_1857	-0.00101909768277508	0.00306869330330858	0.0122323207882147
pos_1859	-0.00202107039178235	0.0104448340741409	0.00187515476102766
pos_186	-0.000347451914681613	-0.00182765180326621	-0.00162934473874281
pos_1860	-2.20773534550911e-05	-8.42805024191067e-05	-9.8222522586935e-05
pos_1861	-0.000232242607146631	0.000177193270645662	-0.000242278239993937
pos_1862	-0.000598047026184001	0.00212551618247793	0.00049993958522594
pos_1863	0.000131332833669581	-9.79712444135284e-05	-0.00104129498863045
pos_1864	-0.00153800766217318	0.004757296703283	0.000176413854931721
pos_1865	0.00203587316699381	0.000694134941315007	0.000539048584264684
pos_1866	-0.000171013214795834	0.000802582680682238	-0.00027360348580619
pos_1868	-0.00120624399575086	0.00152791461687655	-0.00238040487494643
pos_187	-0.000133203388535911	0.000599589941272755	-0.000990529081925742
pos_1872	3.21370023682573e-05	-0.000487275616732305	-0.000675159491012953
pos_1873	-0.000224002477611314	0.000655503152054284	-0.000725953097368212
pos_1874	-0.000232503129731506	0.000272688011758535	0.000144440034518466
pos_1875	-0.00152212594209654	0.00744548145986788	0.00048439874226044
pos_1876	-7.32061794215748e-06	0.000106224106185239	-8.18646262943856e-05
pos_1877	-0.000298093921813035	-0.000192987865788372	0.000858404553067404
pos_1878	-5.40583430593071e-05	-9.73760632488742e-05	0.000576452252082455
pos_1879	7.41056794884009e-06	-0.000329776658058868	-5.31801969171979e-05
pos_188	0.000519884278314629	-0.000852600223018583	-0.000396048258136332
pos_1880	0.000768800611131476	-0.00184927712987964	-3.08038550785687e-05
pos_1881	-0.0241054589794915	-0.126728848802478	-0.0931864774238034
pos_1882	0.000444359659630706	0.00353156278984423	-0.00767301580013765
pos_1883	-7.10971616573911e-06	-1.26509090902573e-05	-3.78533577406067e-05
pos_1884	-0.000636666004715534	0.00356959218450632	0.000483662070933822
pos_1885	-1.7511457960525e-05	-7.51385287622054e-05	5.469292922234e-05
pos_1887	-0.000370013432083444	-0.000728604084793413	0.000772383858409729
pos_1888	4.76345233161051e-05	-0.000534068963095543	-0.000415146502579925
pos_1889	-8.25708192486505e-05	-0.00125425208023907	-0.000834594761662019
pos_189	-0.000953104573742461	-0.00235096963699899	-0.00472007970126356
pos_1891	-0.00133099309218223	0.00450378747151906	0.000372705162584261
pos_1892	0.000143933488086525	3.24540315852949e-06	0.000771624887795981
pos_1893	-2.60351235459902e-05	-0.000108354421068576	-0.000183617339269761
pos_1894	-0.00465351402940647	-0.00860937019211313	-0.0202522289957024
pos_1895	1.76459446895794e-05	-2.36512699833855e-05	-1.2695623296053e-05
pos_1896	-0.000177076226810862	-0.000229628565760669	-0.000381269226335052
pos_1897	0.000647057827507128	-0.00134125244561723	0.00191124319444711
pos_1898	0.00088064737706515	-0.0005757451971981	0.000205716659961257
pos_1899	4.51390059232439e-05	3.67015032381344e-05	-0.000170710828552408
pos_19	-0.000466487186658342	0.00171957562473598	-0.00103230606641054
pos_190	-0.00083168803399354	0.00423981296963281	-0.000553469648905266
pos_1900	-0.000323861243200663	-0.000808110814115818	-0.000237109230475414
pos_1901	-0.000197716864127979	-0.000416221895242764	-0.00010233606284407
pos_1902	-1.54938232365142e-05	2.33260214709103e-05	1.21963298432116e-05
pos_1903	-1.71554040010423e-05	0.000222588255396845	0.000123282181085841
pos_1904	-7.64598861160038e-05	1.38051029328811e-05	-3.38268098760301e-05
pos_1905	-3.15253736163161e-05	0.00416132608227967	0.000517316769478591
pos_1907	-0.000466220982680249	0.00237554331770929	0.000559647756212529
pos_1908	-0.000216528719773375	0.000852820888161561	-0.00088229996564314
pos_191	0.0143974289839897	-0.0135341209576202	0.00601738093796728
pos_1912	-0.00139613672263169	0.00805962088708206	0.00123238054560471
pos_1913	-0.000155928901349795	0.000870161258675943	0.000403405434317659
pos_1915	-0.000335420613351885	0.0013904234082444	-7.0420593645825e-05
pos_1917	-0.000279353774838188	7.44641819060511e-05	0.00315760091865716
pos_1918	-1.04523805716557e-06	8.0382481179628e-06	7.09274628296589e-05
pos_192	0.000249549374443113	-0.000401431613925328	-4.98858452264062e-05
pos_1920	3.50971473954355e-05	0.00015493767758723	-0.00022567109356586
pos_1921	-0.000122555932335751	-0.000237630417852179	2.21558236045709e-05
pos_1922	-0.00011380939801616	9.58004182072296e-06	-0.000217220469924206
pos_1923	-0.0076410515906718	0.0262378542758361	0.00661371415001735
pos_1924	3.52566891116166e-05	-0.000341998097273651	-1.54547363751795e-05
pos_1926	0.00450106914729285	-0.00309914883681256	-0.00683849890749519
pos_1927	0.0442694985440106	0.0851467657281146	-0.103551804508304
pos_1928	0.00194624182739637	-0.00523735394858012	0.00501106635202914
pos_1929	-0.000157227842487817	-0.000950746884832215	-0.00132577671349762
pos_193	1.77571199236236e-05	-0.000135746799598137	-2.55446038436149e-05
pos_1930	-0.0001589875976581	0.00102563331924566	1.13632080190611e-05
pos_1931	1.52676459014655e-05	-9.69455792317767e-05	5.48253846646727e-06
pos_1934	-0.00029978897560654	-0.00230660906423199	-0.00236003445046517
pos_1936	0.000584744899137976	-0.00334398133558914	-0.00479617161209295
pos_1937	3.09482947932009e-05	1.43704265110132e-05	-3.05116658391475e-05
pos_194	0.000271323837909363	0.000395740812107384	-0.00113752869068175
pos_1940	0.000365227659710307	-0.000340843361132469	-9.61871255043102e-05
pos_1941	-3.34484437964274e-05	0.000160608912180244	4.38624460337126e-05
pos_1943	-0.000359811921774098	4.35279949850701e-05	-0.000485721150869509
pos_1944	-7.84980251784838e-05	0.00013640612234918	5.22032406801906e-05
pos_1946	-1.44001121325256e-05	-9.31618581101853e-05	0.000484777234604342
pos_1947	0.0036059216552637	0.000236246102753623	-0.000275073888458496
pos_1949	0.00013725561722078	-0.00024874014725357	0.000265184751429246
pos_195	-0.000195171166939608	-0.00142669506030519	-0.000448520146223287
pos_1950	4.56986697674119e-05	5.18814935409951e-06	-9.21376259822424e-05
pos_1952	-0.000586984014337381	0.00326799632628565	0.000137100940010076
pos_1953	-0.00130080865163693	0.00687562825755679	0.00121035608662021
pos_1955	4.49191335828187e-05	-5.66173803239779e-05	0.000408228862206181
pos_1956	-7.71840145821723e-05	0.000163277445443773	-9.61115450234251e-05
pos_1957	0.000514134884290199	-0.00041293829226971	-7.63643021556573e-05
pos_1958	-6.85660075860854e-05	4.89187927355305e-05	-0.000358948232759692
pos_1959	2.20254937659335e-05	-6.37276128923272e-05	-6.40381755668529e-05
pos_196	0.000406824844482154	-0.00163898958873891	-0.00167133009873375
pos_1960	0.00253346206322553	-0.0194517776164075	-0.00510457060285431
pos_1961	1.01020641606033e-05	-7.5173859649279e-05	7.00450071440426e-05
pos_1963	0.000578057246901913	-9.34972662764413e-05	-0.000715580922654952
pos_1964	-0.000638549294021918	-0.000752515850507463	-0.000747181780768109
pos_1965	-0.000238400651122116	0.000813780606094426	-0.000147056287375583
pos_1966	-0.000127791342702417	-0.000214569179387738	-0.00307172336153856
pos_1967	-3.76155541529024e-06	0.000101334629573699	0.000210672109068046
pos_1968	-0.000925501536051626	0.00468155071049492	0.00098888464615395
pos_1969	-0.00128147579061283	-0.000725066240941241	-0.00168554524409625
pos_197	-0.00185081940326677	-0.00563181129753377	0.00953591888658028
pos_1970	-0.000274893170326456	-0.000191536191025592	-0.00010756030335812
pos_1971	-8.57132994911949e-05	-0.000366622622253231	-0.000417183210743754
pos_1972	-0.000879768232449145	-0.00371071026911556	-0.00395054833928872
pos_1973	0.0033027944183238	-0.00262530277354039	-0.0149904014778462
pos_1975	6.67454078166826e-05	-5.03190612424934e-05	-8.88416468812512e-05
pos_1977	-0.000650414264858963	-0.0025570764857488	-0.00248809605711722
pos_1978	-0.00603257059480044	0.00190882122502912	0.00992451179433878
pos_1979	0.00253468711644958	0.000240595792720546	-0.00346743172534716
pos_198	-0.0010947869081212	-0.00223417689312531	0.00160938631460391
pos_1980	-2.30598234172788e-05	-3.09393093921068e-05	-0.000177418258978067
pos_1981	1.669708706669e-05	-0.000246074467507976	-1.48167643656789e-05
pos_1982	-0.000140216693814044	0.000388809257236209	0.000105205475419089
pos_1983	-8.78862779618288e-05	-1.49111020288975e-05	0.000142705809689942
pos_1984	-0.00316923038824592	-0.012519339765396	0.0741452365563074
pos_1985	-0.000185293839684904	-0.00110760000645545	-0.000638214055339922
pos_1986	-0.000868813912755998	-0.00133371502808192	0.00271122322426704
pos_1988	0.00322025995846202	-0.00306422260803876	0.00326453451189684
pos_1989	-2.49848358110757e-05	-0.000196937769532978	-0.000142567302171341
pos_199	-0.000452877046068505	-0.00153379727215317	-0.000108412477207117
pos_1990	-0.00121711517855454	-0.003652712277932	0.00173303166616385
pos_1992	5.42023706404985e-05	-0.00181577394785835	0.00505779295809701
pos_1993	-0.00321627878844558	-9.67324817435652e-05	-0.0282016929739293
pos_1997	0.001078400496406	0.000702530889480655	0.000996670663496874
pos_1998	-0.00132107065491966	0.00152423295892742	0.00283745242327417
pos_1999	3.8452261869551e-05	-8.34386049324533e-05	0.000228267190857558
pos_2	-0.00126170816611787	0.00433059511404907	0.00253470873028983
pos_20	-0.000166953241273679	0.00015373034109273	-6.98958042025745e-05
pos_200	1.15011722379403e-06	-0.000306705098069441	-0.000144909848455049
pos_2000	-0.000523343181541058	0.00246205523074706	0.000369941054566567
pos_2002	6.89915960258577e-05	-8.7047520258574e-05	-7.20587567359576e-05
pos_2003	-0.00191856568475765	-0.00134327596126553	-0.000670044342248578
pos_2004	0.000273235724045478	-0.000579492130632482	-0.000338604626384413
pos_2005	-6.29506786155188e-05	0.000188393453162477	0.000151408457548457
pos_2006	-0.00035700011481094	0.00169474531947516	0.000267046374618446
pos_2008	-0.000346415432434542	-0.00163584137446628	-0.0020165521229675
pos_201	-1.07641894970422e-05	-7.35501984473706e-06	-1.50179297088002e-06
pos_2010	-0.0013703580140182	0.00314471806813392	-0.000339194525118842
pos_2012	-7.16751881478851e-05	-0.000161057556418848	-0.000137773716476046
pos_2013	-3.77313505837805e-05	-2.24428308863848e-05	-3.87250750120498e-05
pos_2014	-0.0010731542358803	0.00129169302446915	-0.000652972502767729
pos_2015	-0.000445627360636771	0.00027647352891428	-0.000652595407924371
pos_2019	4.34909312546072e-05	6.24060907969586e-05	8.33646816981259e-05
pos_202	-0.00866266438661988	0.0270828858179419	-0.00490904988893526
pos_2020	-3.54490985370625e-05	-5.01049897849131e-05	0.000100523840612002
pos_2021	-2.74474868571413e-05	-0.000277379211774844	-0.000161933117815162
pos_2022	0.00824691954843645	-0.00899142178103485	-0.00992271068536157
pos_2023	7.35956185459065e-05	-0.000412635697730481	-0.000215796893001946
pos_2025	-7.02809646673951e-05	-0.000186551378675078	0.000406268168669932
pos_2026	1.18393773514855e-08	-0.000535156354831	-5.7786579784155e-05
pos_2027	1.13030328769957e-05	-3.89554313366445e-05	0.000252752325494448
pos_2028	-5.05136014004402e-05	0.000761713585281406	4.82573894212974e-05
pos_2029	0.000135536592398644	4.59191207143126e-05	0.00017622003705377
pos_203	-0.00138299766179088	0.000567406939197341	0.00580618709111635
pos_2030	-3.20201914072748e-05	7.46565989599336e-05	1.08405695453719e-05
pos_2031	-0.000655681613152786	5.52163665354692e-05	-0.000920877358732435
pos_2033	-0.00244570963287369	-0.000131771659554546	0.0159603977069946
pos_2034	-1.94286554644357e-05	-0.000252514622330058	-2.45860865054544e-05
pos_2035	-0.000150752154597166	0.000151013909300222	-0.000222412551391836
pos_2037	-0.000165100099160268	0.000318817119443689	0.000129545512523724
pos_2039	-7.51081350349232e-05	-0.000595665653336748	-0.000447890225819091
pos_204	1.67275509087946e-05	-6.12551912865658e-05	-1.9263119366758e-05
pos_2040	0.000340008849690894	-0.000313723484354829	0.000447651347600468
pos_2041	0.000640602495263078	0.000131135224954575	0.000472597400960485
pos_2042	-0.000654283990361235	0.00359313290379037	0.000504441819504676
pos_2043	2.18039981451836e-05	-0.000505449057584579	-0.000184868544504904
pos_2044	-0.000304407672543091	-0.000531659839982789	-0.000222165483324222
pos_2047	-0.00154416715822273	-0.00480097841617653	0.00113926956671093
pos_2048	-0.0011435068677793	0.00298524878225898	-0.00129958357032762
pos_2049	-2.49417567901136e-05	-9.83257004523071e-05	-0.000165852816107431
pos_205	-9.68767487587519e-06	-0.000373402080628074	-0.000410793110287522
pos_2050	-0.000268535021895683	-4.04241491370318e-05	-2.28483125104766e-05
pos_2051	0.000495441607337052	0.000153867346265858	-0.000437270695665783
pos_2053	-0.00109198468847733	-0.0012563710432714	-0.000562818701145645
pos_2054	0.000152246736040722	-2.87168247805938e-05	-0.000243924681855848
pos_2056	-3.65248526078748e-05	-0.000165825695628775	0.000249454375698842
pos_2057	-6.16712474932625e-05	-0.000194705598130491	0.000330897068402901
pos_2058	0.000382190017616911	-0.000882701132169279	0.000957960290275296
pos_2059	0.000104005814027029	-4.25395467600242e-05	0.000175072002219774
pos_206	-9.08319022152656e-06	-9.06094935151262e-05	-0.000239166853815391
pos_2060	-4.11254787226378e-05	-0.000131736017261801	0.000358882540592266
pos_2061	-3.18515511944176e-05	0.000161473056721288	8.54874954405564e-05
pos_2062	-0.000833806265519844	-0.00176931636662653	0.00016477048237577
pos_2063	-0.000437616450777011	0.00129977401637565	0.00016305644273133
pos_2064	-0.00109588771691989	0.00642602110649214	0.00134513951063879
pos_2066	-7.0157508202258e-05	-0.00106149927512191	-0.000712597555771213
pos_2067	-0.00085068316688701	0.00368541725296246	0.000502408490635194
pos_2068	-0.00107724018497545	-0.00304571161385433	0.000433042699448655
pos_2069	1.13563987103111e-05	-0.000521303594821138	-0.00121600444443018
pos_207	-0.00459769011619488	0.00745425067992471	-0.0126175966433568
pos_2072	-0.000606319814400094	0.00152797270869206	-1.24091058579271e-05
pos_2073	-0.000523321806551042	0.00266557419674942	0.000667139191983922
pos_2074	-0.0156312611048146	0.0725918005024345	0.0230542217325593
pos_2076	-0.000237232951635325	-0.00169024910484425	-0.00282799513720066
pos_2077	-0.000145892418827449	-0.000459895388566073	-0.000592166674435646
pos_208	-0.000303255731424621	-0.00105570032343256	0.000773987811874939
pos_2080	2.24645996413113e-05	0.000157521967461798	0.000146839672346859
pos_2081	-5.27192408681072e-05	0.000169295585854152	-7.2948587211272e-05
pos_2084	0.000421048735375709	0.000174668115668805	-3.7555905864125e-06
pos_2085	-0.000453487203539529	0.00164638213166009	0.000539979191613552
pos_2086	-2.3881012261553e-07	-0.000135024197348535	-0.00014081352122497
pos_2087	1.91673130290928e-05	6.06779556764155e-05	-2.24523413154269e-05
pos_2088	-0.0228645511138082	0.1031644305753	0.0327121314106363
pos_209	4.91809446210425e-05	0.000479931400986365	-0.000362925149535286
pos_2093	0.00230511723117482	-0.0145146337949461	-0.00697800428650921
pos_2096	6.58022268721674e-06	-6.00921145161932e-05	-1.64572726605439e-05
pos_2097	-0.000215162904923092	0.000790184851212	-7.03680461106487e-06
pos_2098	1.29838756499274e-05	-0.00034701366043456	-0.000201388041530304
pos_2099	0.000137485370555242	0.000527834304250332	-0.000167068897682675
pos_21	-0.00381569922378543	0.0121309056775576	0.000130466954569992
pos_210	-0.000104568351328035	-0.000540004660548327	-0.0005401401356705
pos_2104	-0.00202065438583887	0.00623712235467954	-0.00165668020738017
pos_2105	2.01812972491141e-05	-4.16197315890151e-05	-2.95193803540656e-05
pos_2107	1.28101263571992e-05	-5.21848225652271e-05	9.82056916239733e-07
pos_2108	-6.99429408251007e-06	-0.000128594829234819	-6.94640012404517e-05
pos_2109	-0.000456646148850437	0.000200068547430565	0.000239877215566638
pos_211	-0.000460274484687695	0.00165643369217388	-0.00138830697989004
pos_2112	-1.5450229182033e-05	0.00021135587902087	-0.00012765216506809
pos_2113	5.90993410429701e-06	-0.000368844437488058	-0.000235038421251519
pos_2116	4.60219213405166e-05	-7.409836974157e-05	0.000167041160028417
pos_2117	0.000547903721386584	-0.000763749464292479	-0.00139807557287783
pos_2118	-0.000864415413930404	0.000269403870064636	-0.00239012705344197
pos_2119	0.000753769862752905	0.000787622962883465	-0.000394874716721145
pos_212	7.43391877659865e-05	-0.000225438753146993	0.000306099718363823
pos_2120	-3.62530921913288e-05	-6.32248433827748e-05	-4.17230743324037e-05
pos_2122	-0.000273754006848195	-0.000642613820803431	0.00116735058064157
pos_2124	-0.000258372028423477	0.000929010879910963	0.000355283076902608
pos_2126	4.16725107834423e-05	1.72734577355676e-05	-0.000213702833055077
pos_2127	0.000578948452282551	0.000135427197855102	-0.00472525462854681
pos_2128	-2.75346123119127e-05	-0.000215615233142307	-1.43632647038154e-05
pos_2129	-0.000495376410689997	0.000106091902167736	0.000465380183787805
pos_213	-3.55856638246419e-05	-0.000170463248092003	1.52347794894189e-05
pos_2130	0.000273869094769562	-6.38553682561407e-05	0.000137260332742745
pos_2131	-1.30386363951294e-05	-0.000313665311916339	-0.000493411511702523
pos_2132	0.000150645882506917	-0.000441802467592571	-0.000845924686407155
pos_2134	-0.000120952318507059	0.000143659734001037	-0.00014734228865143
pos_2135	-6.21033204793243e-05	-6.29426937365572e-05	-6.58832916223877e-05
pos_2136	-0.00401573298348834	0.00806833288592509	-0.00340313919553636
pos_2137	-2.43387853691373e-05	-0.000138940278387977	5.71183948240729e-05
pos_2138	0.000171235220168081	-0.00152818768484131	-0.00316670629814835
pos_2139	-6.44505186116843e-05	0.000102766052568946	-8.7866117476448e-05
pos_214	3.60257213769919e-05	-0.000419815282996942	-0.00243298595731127
pos_2140	-0.0181603459555214	0.069942983247803	0.000660500638088601
pos_2141	-8.30571469821907e-05	-0.000644528659742599	-0.000820955625522635
pos_2142	-0.00341760966242012	0.00381677235819292	-0.014285467066921
pos_2143	8.77119331985418e-07	-8.65440365277859e-05	-0.000202074739906498
pos_2147	-8.5467472606545e-05	-0.00027763098169957	-0.00043192384851885
pos_2149	-0.000137369027831909	-0.000389339031737175	0.00033692235194654
pos_215	-0.000134370925986715	-0.00433595665564141	-0.00161700593151199
pos_2150	-2.06085752218404e-05	0.00010671290923753	-5.63827033665873e-06
pos_2151	-8.21172866530147e-05	-3.74452051824553e-06	-0.000186236540530315
pos_2152	-9.69777890362915e-05	9.38295819954568e-05	-0.000266986482058906
pos_2154	0.000156205113817008	-9.24559374723168e-05	-0.000148231713927835
pos_2155	4.79837198201649e-06	3.52763074752032e-05	3.02542214986575e-05
pos_2157	3.90846019951954e-06	-2.97230635896659e-06	-2.87467119331757e-05
pos_2158	-0.000247921940540347	-0.000917493439767942	0.0027963275975157
pos_2159	2.18756083453579e-05	-0.000140963284820714	-0.000851082246965238
pos_216	-0.000204566563157494	-0.00163913461311553	0.000192241382184302
pos_2162	-1.64376815191746e-06	9.54030753301844e-05	0.000824809887854262
pos_2163	9.42126076464127e-05	-0.000965440238193696	-0.000174726355612636
pos_2164	-0.000127113519201733	-0.000418375401235177	0.000224175870412406
pos_2165	5.93862761769795e-05	-0.000896410110860686	0.00117049645523867
pos_2166	-0.000186165948586936	-0.00018845462048775	-6.5890513732068e-05
pos_2167	1.86134400149647e-05	-8.17087790593426e-05	-0.000111063506202134
pos_2168	-0.000162462868088066	0.00030838483217415	-0.000132609241203767
pos_2169	-0.000607082764329223	-0.00571240884966633	-0.00755769740940182
pos_217	-2.41585280795511e-06	-4.01562691786018e-05	-3.60604958225847e-05
pos_2172	-7.91050946043064e-05	0.000265442614559925	-0.000228326427112884
pos_2173	-0.00245060433454701	0.00976765203003102	0.00326412176787109
pos_2174	1.77759508402963e-05	-0.000264931650943243	-0.000328324765195183
pos_2175	0.000295349829560922	0.000157129845315186	1.07635796530178e-05
pos_2176	0.0120071882173439	-0.00617697332097785	0.00154212396686755
pos_2177	-0.00663392714350783	-0.0267852906741001	-0.0262506507855979
pos_2179	-2.92730646565573e-06	-0.000166422321099756	-0.000147487365727185
pos_218	0.000200469869359458	-0.000568786450787064	0.000185819553301939
pos_2180	0.00081041398057102	-0.000483050283432652	0.000282183492682139
pos_2181	5.98264226502307e-05	7.36968090749923e-06	2.52240375222443e-06
pos_2182	-0.000420881668197308	-0.000421775344462034	-0.000311242123448495
pos_2183	2.37491647429659e-05	0.000142686655418547	0.000568795900466294
pos_2184	1.04646884248233e-05	-0.00023349390510704	-0.000386553404147925
pos_2185	-4.36753365057242e-05	-0.00010715280239043	-0.000500392428343494
pos_2186	-0.00152568857769839	0.00487844167171036	-0.000295390573649107
pos_2187	3.54765562632437e-05	7.4180755973266e-06	3.57084585842517e-05
pos_2189	-0.00734840056559009	-0.0388469324764223	-0.0459836593772235
pos_219	2.6774698057192e-05	0.000466888715172751	-0.000946088423892707
pos_2190	1.68561953205121e-06	-5.22420546015751e-05	-4.12524318920642e-06
pos_2191	-0.0020808588082011	0.00440523950583139	-0.00375956760633884
pos_2192	-0.000642647278814194	0.00142671915616415	-0.00171395719581293
pos_2194	0.0040118473364764	-0.00227118935385172	0.00177792552123755
pos_2195	-4.17693559412671e-05	0.000157414414084802	-6.81187942882211e-05
pos_2196	2.77895336685623e-05	-0.000125705218867995	0.000129867998603874
pos_2199	-4.92001305408978e-05	0.000196460958787336	-4.51645185370921e-05
pos_22	0.018803912536568	-0.00353654116210725	0.0588966900137576
pos_220	0.000618891170396439	0.000539470739053038	-0.00379556424764661
pos_2201	-9.26648220013515e-05	-6.05044414361782e-05	-0.00032030530715954
pos_2202	7.80946874557352e-06	-2.07802082368662e-05	5.6141496047578e-05
pos_2203	-0.000128318429217913	-0.000814218957166798	-0.000455805261696143
pos_2204	8.82810969509238e-05	-0.00010819499149825	-0.0001211025938387
pos_2205	-0.000158823821088707	-0.000710370018875907	-0.00175675579151428
pos_2206	0.0025819749797634	-0.0498308720873322	-0.0222515653844953
pos_2207	-2.17949201781155e-05	0.000109787024765755	-0.000174935863137008
pos_221	0.000164709700651991	-4.42852213838518e-05	5.94571726485286e-05
pos_2212	-2.904512235211e-05	0.0001156482744259	0.000117007919644138
pos_2214	0.000161409864728893	-0.000152900232000526	0.000309370886498508
pos_2216	0.00077096041395545	0.000236944814979717	-0.000656791794925046
pos_2217	-0.000243395790827311	0.000150789160564904	-0.000822619777167657
pos_2218	-4.69454171942961e-05	0.00022488718824086	-0.00024387116185901
pos_2219	-0.00110674914361461	0.00508788316756162	0.00148668368985888
pos_222	2.54827582643726e-05	-3.41142525849048e-05	0.000110155769606236
pos_2221	-0.000415864286748942	-0.000396912085145197	0.0013720992272887
pos_2222	-0.000540631385537159	-0.00205577355251846	-0.00220612271127175
pos_2224	-0.000642174740645846	-0.000326080117679551	0.00103257378929299
pos_2225	-0.000912569959323685	0.0033675580118695	-0.000858732391186709
pos_2226	-0.000279983729886793	-0.000629295241757571	0.00322927723250954
pos_2227	-0.000148920690949244	-0.000166231750937073	-1.45990018837341e-05
pos_2228	1.88632351661517e-05	-0.000162059395594035	-0.000119715163951774
pos_2229	-1.26677871680546e-05	-2.0701555420343e-05	3.38287862020122e-05
pos_223	-0.000422111644524689	0.00282189202488003	0.000433868021614221
pos_2230	-0.00381911599946412	-0.00263207294995721	0.015844419736478
pos_2231	4.77844614880946e-05	-1.55292565924028e-05	6.9623666261527e-05
pos_2232	-0.000495013116938287	6.89697946213359e-05	-0.000576655816761847
pos_2233	-0.000260667991200387	-0.00304007013500415	0.0096865889678754
pos_2234	-5.03344190973253e-05	8.4833141956445e-05	0.000106294285934155
pos_2235	-0.00010324809536304	-0.000131596228008499	-0.000117990527124547
pos_2236	-0.00145992828870873	0.00726815943343972	0.000944465128351284
pos_2237	-9.5169395222905e-05	3.72626909232985e-05	-0.000142244086781079
pos_2239	6.36505384827676e-05	-0.000436687366297586	0.000181755965668212
pos_224	-0.00283805724979394	-0.0107245075594031	0.0683748894135116
pos_2240	-7.2533517605567e-05	-2.93966472899615e-05	-0.000136411622934144
pos_2241	-0.000102218027542646	0.000181834703303517	-8.8999874796082e-05
pos_2244	-0.000135240709751195	-5.48046808096076e-05	0.000211862494634515
pos_2245	-0.000319136644973855	0.000272308105236049	-0.000281128976734967
pos_2246	-9.51827412595953e-07	-0.000102322049980863	-9.29355092915392e-05
pos_2247	-0.000412952271375728	0.000772690269637847	-0.000496419220330633
pos_2248	0.000147356409166858	1.61564454284128e-05	-0.000297796743088903
pos_225	0.000317278707152765	0.000658336112007888	-0.00277147457092857
pos_2250	-3.98854412515024e-05	0.000212314779614089	1.68367102505958e-05
pos_2252	-0.000166483856380723	-0.00080161243123734	-0.00102639670145574
pos_2255	9.02854837520311e-05	2.03400363942182e-05	3.33932163423313e-06
pos_2257	-1.17160353089056e-05	-0.00158802488394062	0.00122158230187233
pos_2258	-0.000220577066097344	-1.27083237994434e-05	0.000294094204245528
pos_2259	-1.56444687572609e-06	0.000113246573409489	-1.83460538927335e-05
pos_226	0.00196303142102392	0.0375801688717194	0.0116026582891862
pos_2261	-8.98180321151863e-05	-0.000200142670074742	-0.000373138091072428
pos_2262	7.93633934944834e-06	-1.59846606151351e-05	-3.06652879161947e-05
pos_2263	0.00129457536430238	-1.04458984333142e-05	-0.00865572735435579
pos_2264	-5.11523779673904e-05	0.000133926663330874	-6.28229251009723e-05
pos_2265	-0.00097788654758271	0.00521480722625396	0.000612490791141434
pos_2266	-0.00032123828250737	0.00151241365068449	0.000207366569730449
pos_2268	-0.00181287493075195	0.00364562281544366	0.00139858280784883
pos_227	-0.000283652691802074	-0.000329032337833678	-0.000718641471278802
pos_2270	-0.00036115301122905	-0.00340261361575028	-0.00049393747177242
pos_2272	3.00216409367636e-05	5.42950096140177e-05	6.54202640449401e-05
pos_2273	-0.00163824805320208	0.00212008566642014	-0.00193286511550879
pos_2274	-0.000140319410995394	0.000300163976039673	-0.000387885509579397
pos_2277	0.000189341347985826	-0.00138484196338386	-0.000815990089107112
pos_2278	-0.00295309652258354	-0.00714177211243374	-0.0146011864520606
pos_2279	6.59685560812256e-05	-0.000152823014974284	-0.000472680917738898
pos_228	0.000260552360638323	6.13872861707374e-05	-0.000148093723052034
pos_2280	-0.000134941005010027	-0.000330007388107483	0.000554217510429113
pos_2281	-0.00159231066501532	0.00871110539260294	0.00109284183165684
pos_2282	-9.18146935257092e-05	-0.000251991903177758	-0.000260631263786213
pos_2283	-8.29173322786868e-05	0.000219005674645115	1.20241772422441e-05
pos_2285	-0.000216849387943115	0.0006228292843137	0.000236662344133072
pos_2286	4.06315646174758e-05	-0.000245221634671992	-0.000191298484093555
pos_2288	-0.0021311645031896	0.007381524677144	0.000294667316840806
pos_229	6.2382692489455e-05	-0.000141581649292019	-8.36616774767458e-06
pos_2292	-0.00297119401114179	-0.00166596672925347	0.0168296855408077
pos_2293	0.000111923725604512	-4.06352048197632e-05	-0.000292407950748841
pos_2296	-0.000142219686017731	0.000134016399495876	-0.000125884605380629
pos_2297	-0.000798851628442797	0.00328723992001543	0.000426022938684706
pos_2298	0.000757856468840242	0.000919705060447427	-0.00311863498173821
pos_2299	3.04126297523727e-05	-0.000376651292215303	-0.000347039908807543
pos_23	0.0034140644108802	-0.00709945379590136	0.000304369233623802
pos_230	-4.36863038000112e-05	-0.000820113398964869	-0.00108316159287501
pos_2300	-4.56057340220675e-05	0.00012737337144398	1.344831472764e-05
pos_2301	-0.00214783200279907	0.0119111376078347	0.00179538809387553
pos_2302	-0.00353585349829195	-0.0115558338509899	-0.00498116475049107
pos_2305	0.000140018682826059	-0.00107501038306835	0.000150170042230477
pos_2307	-5.65686721863637e-05	5.28241830018816e-05	-0.000191138064028338
pos_2308	-6.49805166056736e-07	-4.87580510967408e-05	-6.36054791124455e-05
pos_231	0.00124616104039924	0.0004056567691479	-0.00790929567900534
pos_2310	3.90464860174347e-05	3.93891761709921e-05	6.32181261965817e-06
pos_2311	-0.00131607631892063	0.00643925912488906	0.00132135508751344
pos_2313	0.000221173158412713	-0.000690519589471051	-0.000900611643589298
pos_2314	-0.00482332847702559	0.0156787339408323	0.00326195627670735
pos_2316	-0.00100651854512278	-0.00246342183293575	0.00188027107917548
pos_2317	6.91802198759536e-05	-0.000640567477943308	-0.000801877075395759
pos_2318	0.00322297909686404	0.00168185333748167	-0.00258759280213438
pos_232	0.000340454161489269	-0.00116765289151108	-0.000442507295306574
pos_2320	-0.00140656095707981	0.00165500126969592	-0.00236367287818821
pos_2321	1.87782603421673e-05	-0.000301794443716049	-0.000219868571028993
pos_2322	-0.000141613320859675	-0.000583292043970801	-0.000932177235503738
pos_2323	-0.000221815726905537	0.000783715774788813	0.000158565063715994
pos_2326	-0.00017678104771276	0.00276199237771656	-0.00235328980274374
pos_2327	-0.000654954381976284	-0.00131618515476236	0.00721102331902913
pos_2328	-2.87079554765636e-05	0.000116309979583736	7.73110265900252e-05
pos_2329	-0.000274880819816413	0.000501654268469069	-0.000557089327477724
pos_233	-0.000167076305221753	-0.00110765266631334	-0.00119155900619897
pos_2330	-0.000526850744804909	0.00298793175336072	0.000533234437178461
pos_2332	-0.000110704773479865	-0.000216473194981951	0.000439140477730228
pos_2334	-0.000313118377097125	-0.000185228427730733	-0.000246452781354931
pos_2337	-7.30696333258009e-05	-0.000806500342049047	-0.00170667190169769
pos_2338	0.000845664482247086	0.000119381126735156	-0.000320257747248976
pos_2339	3.49763096102127e-05	-0.00023412198835409	0.000307251899956483
pos_234	-0.000567537250991852	-0.00130467492241089	-0.000512641560615934
pos_2340	-0.000203684083569037	0.000249560025552227	-2.92935198478793e-05
pos_2341	0.00342420705214183	-0.0109390849601393	-0.0110902627051045
pos_2342	-5.47039974126805e-05	0.000277230057967987	0.000463356380698722
pos_2345	-8.04227210241806e-05	-0.000125223500667389	-0.000130025652964915
pos_2348	-2.08854895825809e-05	-0.000352926706061302	-2.64605516918945e-05
pos_2349	0.000996748393676597	0.000403124955188405	-0.000563016542833457
pos_235	-0.00073117680060491	-0.0038044100329328	-0.00208183748734287
pos_2351	-0.00141669059508279	0.00791791410578586	0.000932552503322807
pos_2352	0.000903249833671523	0.000446515365667186	2.15807903511022e-05
pos_2353	-0.000219178899767961	-0.000287660216725357	-0.000387856837873679
pos_2354	4.58004059470904e-05	-0.000256883177285758	-0.000232636261111541
pos_2356	-0.000208280061723809	0.00101994041562668	-9.47522939264564e-06
pos_2358	-0.0002969929603944	0.00126699369788688	0.000170592792675934
pos_2360	-1.04750986301194e-05	-0.000117040401374824	-0.000172292517731111
pos_2361	-6.64789583363971e-05	-0.000362320800291249	0.000127657016345708
pos_2362	-1.42254888847714e-05	7.52292876671836e-05	5.83587840428799e-05
pos_2363	-0.000216934627692246	-0.00207280649127961	-0.000816953146890249
pos_2364	-0.00168229581894878	-0.000716780218069017	-0.00277918667514924
pos_2365	0.0134165705338571	-0.0119045280901393	0.0751652436489346
pos_2366	-0.000202455713500775	-0.000372513345486083	-0.00033632879899118
pos_2367	-0.00470079012057622	0.0140132935059457	-0.00208944343857711
pos_2368	-0.00104129516693389	0.00599528975435639	0.00125327563095759
pos_2369	-0.00214845839947786	0.0110301848923639	0.00161116682532047
pos_2370	0.000106056305580771	-0.00123850086941949	-0.00145034746628089
pos_2372	-4.41725286886669e-05	-0.000442290207827412	-1.87602931934784e-05
pos_2373	0.0007267090371808	-0.000961318915675451	0.00428152176803887
pos_2375	-0.000218247672713805	-8.68444578386717e-05	-0.000114283142266168
pos_2376	-0.000281861360936316	-0.000266249749532599	-0.000577646320654877
pos_2377	5.39670010793766e-05	-0.000316488164640991	0.000252511926111418
pos_2378	-0.0234726379388504	0.0852461627379962	0.00139111943625444
pos_2379	0.000110903964515534	-0.000527097323321461	-0.000466152351003722
pos_238	0.000336617952883317	-0.000860202764850167	0.000721098522087148
pos_2380	0.00266290794942514	-0.00569726887770104	0.003405351458796
pos_2382	4.20966874179461e-06	0.000939878345363764	-0.000150668531908728
pos_2383	-0.00571308592671754	0.0146142425111825	-0.00285054462582862
pos_2384	0.000103803469234964	-0.000356084171581548	-0.000583185372575857
pos_2385	-0.000598833404013795	-0.000388616517164537	-0.000672748231004796
pos_2387	-2.46108369403253e-05	2.02117506772873e-05	-8.78357502613033e-06
pos_2388	-0.000152249421243733	-0.000664837768439829	0.00238062678559322
pos_2389	0.000325023262852746	0.000369000726675223	-0.00202042324644748
pos_239	0.0303474557464064	0.000670833981066824	0.00775180859074117
pos_2392	-0.00333279817328482	-0.00334908475806704	-0.000515423817917543
pos_2394	-0.000105111234486953	0.000625541937702874	-0.000254448355974323
pos_2395	8.53653539216264e-05	3.64772352183174e-05	-0.000125778919578484
pos_2396	7.78742914065074e-05	-0.000170504814324642	-0.000258347121426846
pos_2397	-0.00110440760450803	0.00421354731367548	0.000913085946776651
pos_2398	-0.00176021964816352	0.00812540661891428	0.00251168189378393
pos_24	3.82568000966512e-06	-0.000332581729290045	0.000213226926048941
pos_240	-5.87198795780271e-05	0.000193465203439181	-3.09964560212556e-06
pos_2405	-0.00149545169259492	0.00796233237024803	0.000928014034221202
pos_2406	-0.000446886023276082	0.00129285909967409	1.99623219100927e-05
pos_2407	-5.22780303103842e-05	-3.5667359639405e-05	0.000234729416189247
pos_2409	-1.66790777276396e-05	7.14533129048897e-05	0.000113907521283645
pos_241	0.000839589111375993	4.62682094760254e-06	0.000645855260898105
pos_2410	-7.73933956610836e-05	-0.000633984565116288	-0.000451383350377662
pos_2411	-7.47359758105967e-05	-0.000272497280392122	-7.98130597564915e-05
pos_2412	-0.000295675256421988	0.00188886303668199	0.000338252946771348
pos_2413	-5.137528355161e-06	-1.30515216501012e-05	-3.77829002671709e-06
pos_2414	-1.43180408307224e-05	-9.12229513749092e-05	-8.35602957596011e-05
pos_2415	-3.944246753601e-05	6.94864157535622e-05	-7.05144787207133e-07
pos_2416	-2.16844455805716e-05	0.000159654201096378	5.63839184259072e-05
pos_2417	-0.00553536152110499	0.0154229630030115	-0.00258649048638182
pos_2419	-0.00345727776691866	-0.00977783437569585	-0.0011855116752083
pos_242	-0.000408470798936247	-0.00115389728141297	-0.00143114306362801
pos_2420	-0.000154073616760657	-0.000384900954982229	0.00213287407077753
pos_2422	-9.67243321566991e-05	0.000219723935358163	-2.20672822072295e-05
pos_2423	-0.000538136309587002	-0.00337672189833306	0.000637257519914722
pos_2424	-0.000644075536371438	0.0014639573876416	-0.00170570846853312
pos_2425	1.46472829032741e-06	8.10500046615883e-06	-6.95233766606002e-06
pos_2426	-0.00112990468322644	0.0016071460594256	-0.00101342406071302
pos_2427	8.52179902924989e-05	0.000189819968944585	0.000475150229498249
pos_2428	8.04421761160111e-07	0.000456590722974757	-0.0043061488525613
pos_2429	-0.000333455263584869	0.000628809332157022	0.000670474043859131
pos_243	0.00435129097153591	-0.00436057260182593	-0.000293645301876878
pos_2430	-0.00338604506282458	0.00514229184162333	-0.00574924969373178
pos_2431	0.000489746673309719	-0.000282267087359283	-0.000523533053307126
pos_2432	-0.0014009757884873	0.00642060134925204	0.00208126165882391
pos_2433	-2.49389016735998e-06	-6.29566686938472e-05	-4.97845095974473e-05
pos_2434	-2.14059028749096e-05	-0.000446957674387265	-0.000708676155337699
pos_2435	-1.44669786571373e-05	-0.000110962796478253	-3.88997675349458e-05
pos_2436	-9.41782055291068e-05	-0.000219907876959136	-0.000215370836474557
pos_2437	-0.00387520683836262	0.0146138192532607	0.00552230141204254
pos_2438	-0.0021617356242976	-0.0277372022931835	-0.0252519643471298
pos_2439	-5.67307712569364e-05	-0.000381391449777906	-0.000746778236715188
pos_2443	-0.000183680786463343	0.000448218348914328	0.000405324258764446
pos_2444	-0.000876916500701973	0.00125958776266224	-0.00301334154123677
pos_2445	-0.000163375283571553	-6.28911842175805e-05	4.66743711115095e-05
pos_2447	-5.91420101269753e-05	-2.59712165718645e-05	0.000793434225102734
pos_2448	1.97330018074501e-05	-8.93872204043112e-05	7.30116844127753e-05
pos_245	0.0104137995181493	-0.00627455485148632	0.0171967147163764
pos_2450	-0.000398216496834189	-0.00171984249874944	0.000507532504059098
pos_2451	-8.70620129308321e-05	0.000215921989493661	-0.000173884637110816
pos_2452	-0.000366735720353832	0.00141119910649997	-0.000531544379574544
pos_2454	-0.00341083622104478	-0.00249030668347148	0.00156194576363931
pos_2455	-0.000968724011013359	0.00288370584952662	0.000699397352931625
pos_2458	0.000102568373880844	-0.000251740933431255	0.000149985949049943
pos_2459	-0.00122879997396094	0.00383936282126703	-0.000555309951339444
pos_246	-0.000786328874984063	0.00495792433009095	-0.00754346863316024
pos_2461	-0.000386789892139678	0.000656465388341955	-0.000241160970787697
pos_2463	-7.89892971800646e-06	-0.000123942855076711	-7.30324377996474e-05
pos_2464	-0.000991504004293029	-0.00140399996292174	-0.00377312369734477
pos_2465	-0.000188801944183814	-0.000517057139690253	-0.000510208745996339
pos_2466	0.000139460277028594	-6.25439577353697e-05	0.000448840368736819
pos_2469	-0.000804129258891913	0.00406146041415867	0.000739655790795575
pos_247	0.00233732361083213	-0.00308363167253969	0.012777175907799
pos_2470	-1.86841568698504e-05	6.0510486205572e-05	1.6094944914589e-05
pos_2473	-0.000575982933685266	-0.00142788434108289	-0.00215684425934633
pos_2474	0.000282978566625978	1.77148394867144e-05	0.000114037183370281
pos_2477	-0.000593938177214489	0.00292538430818521	0.000561776699448968
pos_2478	-8.76560320996313e-05	0.000635143184428157	8.74093843689545e-05
pos_2479	1.14718037520999e-05	-5.82787338438357e-05	1.94261691634628e-05
pos_248	-0.0111088569848839	-0.146114729362903	-0.0429697590635911
pos_2480	-0.000147973119706568	0.000376564742499741	-0.000101752600272427
pos_2481	-0.000162607954276552	-0.00013581828880995	0.000421152043353685
pos_2482	-5.90344519003735e-06	-3.3771533634403e-05	2.0581838641323e-05
pos_2483	-0.000185612753769014	-0.0012978481547343	-0.000369679002324745
pos_2484	0.000830467447380208	-0.00010494304675157	-0.000969252521603755
pos_2485	-0.000161300517785515	0.000605569030700227	0.000345695432989934
pos_2487	0.000385444843991418	0.000291422742449873	1.80961151991482e-05
pos_2489	0.000506228180195183	3.70748194175102e-06	-0.002142231906207
pos_249	-0.000524569544420075	0.00172114402284406	8.30586109118896e-05
pos_2491	-0.000201831295708871	0.000284243880935107	-0.000198680640791602
pos_2492	7.89839604564235e-07	3.43865123049484e-05	-3.08412692253876e-05
pos_2493	-8.83822943996929e-05	-0.000166341315830352	0.000168096132285482
pos_2494	-3.36043929969529e-05	0.000128092786290781	-1.73222576942792e-05
pos_2495	6.29830098377792e-05	-0.000244616952860604	-0.000230569334175497
pos_2497	0.00024441823408516	6.16214758804911e-06	-0.000322849526669511
pos_2498	-0.000401263791356622	-0.002874393646051	-0.00215250665568845
pos_2499	-0.000488881001599924	-0.0019308016179701	-0.00171676337131701
pos_25	-0.00112285085916622	0.00018650127077141	-0.00245427672904017
pos_250	-0.00158089224513472	-0.00109617405340722	-0.0015979612299385
pos_2506	-0.00109287098916773	0.00229683099050637	-0.000313954787728066
pos_2507	3.12888356227029e-05	-0.000142316776579333	0.000911463729862141
pos_2509	8.91320585017208e-05	-5.08076638148571e-05	-9.73569448531118e-05
pos_251	-0.000996437236224392	-0.00255755127417688	-0.00331269869102821
pos_2510	-2.91086750245025e-05	-3.71714125092096e-05	-2.67549288568249e-05
pos_2511	-0.00126751760308918	-0.00653182775019768	-0.0062129267541851
pos_2512	-0.000105769625249854	-0.00168957796167282	-0.00177154992154659
pos_2513	0.00019591032636328	8.68098919700269e-05	-0.00153195549230923
pos_2514	0.0241179806899585	-0.058606887388999	-0.0129898388541922
pos_2515	-0.000191301660783935	-0.00079728485315684	0.000885318270244884
pos_2516	-0.000536248999083157	0.0007751305134226	-0.000632135869612701
pos_2517	-0.00149927425325775	-0.00362490087711288	-0.00154692887806203
pos_2518	0.000367692610104302	0.000232725519477651	-2.11933874918038e-05
pos_2519	-3.92246470451897e-05	-0.000158969200311759	-6.48217148556169e-05
pos_252	-0.00122056518545457	-0.00305043209266076	-0.00112579536291648
pos_2520	-0.000338134791351324	4.71848428087516e-05	-0.000404487535865644
pos_2521	0.000239389684119444	0.000247218144686926	-0.000288021356038424
pos_2524	2.39720408431904e-06	0.000158692309762986	-0.000100589832815409
pos_2525	-2.33169187572851e-05	-3.67978961831365e-05	2.94667072402245e-05
pos_2526	0.000272664830763768	1.75403019388053e-05	-0.000728636141862537
pos_2527	-8.67726569623459e-05	-0.000199662769341311	-0.0004282007711912
pos_2528	-0.000537466094505789	-0.00089133697618744	-0.000477229427989496
pos_253	0.000689926237921611	0.00104201057774795	-0.0027695004641419
pos_2530	-0.0001149340907268	-1.40422848709488e-05	-5.39962192944442e-05
pos_2531	0.00035386429820134	0.000219926233394335	-0.00110735141383562
pos_2532	1.40003255721297e-05	-0.000151791380200893	-0.000426673733520561
pos_2534	-0.000350541587462993	-0.00132181084782712	-0.000219383989353425
pos_2535	0.000113536557220353	0.000198524593100994	-6.64254795120874e-05
pos_2536	-1.78634629863106e-05	1.72805780468659e-05	-3.73531960859015e-06
pos_2538	-8.81988594618223e-06	-0.000299425288322625	-0.000865360264799167
pos_2539	1.53179967158382e-05	0.000308201428596602	-0.000520928843473211
pos_254	0.00100859954191802	-0.000335655453004121	-0.000174626710259414
pos_2541	8.5803219006939e-06	-0.000215841356973211	-5.04449037772203e-05
pos_2542	0.000266641093678458	1.20511670641299e-05	-0.000317069028319609
pos_2543	-0.00221862270396424	0.00298653527842813	-0.00107680671573258
pos_2544	-0.00053876621183802	0.00299987190525973	0.000630669289078259
pos_2545	-8.7177321617043e-05	-0.00101276464063765	-0.000382800194012104
pos_2546	-0.000185067077576431	-0.00045540696862817	1.88814121341351e-05
pos_2548	-2.56435821840359e-05	-7.65646419865372e-05	-0.000142653467835397
pos_2549	0.000634901771405188	-0.00555566185466208	0.000211526181851157
pos_255	2.20436182839745e-05	0.000446645690613602	0.00292617654906832
pos_2552	-3.0775381220009e-05	-0.000114229208428333	0.000236455065495599
pos_2553	-0.00081654423574217	0.00183506964128279	-0.00184159630281291
pos_2554	-2.03419423886731e-05	-1.85390001810654e-05	9.18256124996343e-05
pos_2555	-8.11113333485245e-06	0.000140877899749364	-8.45263214382803e-07
pos_2556	0.000806486694263811	0.00036610269219979	-0.00678335379997902
pos_2557	-0.0537016574672472	-0.0310225082548117	-0.0389524533445261
pos_2559	-0.0021502075773278	0.00415507382482701	-0.000137223219532102
pos_256	1.35096048710384e-05	1.13785317254164e-05	0.000116279954016081
pos_2560	-5.58970404808443e-05	-6.73683902915968e-05	-0.000193198254897523
pos_2561	-0.00029669917213252	2.93286834858466e-05	-0.000543450158466956
pos_2562	-0.000146570601251431	0.000744235315888439	-4.4475568742144e-05
pos_2563	-0.000125445728986489	0.00048243531452664	-5.11852429770531e-06
pos_2564	-0.00013634934197026	0.00102555650891624	0.000186453519730013
pos_2565	-5.64988216399708e-05	7.569727367993e-05	-0.000313053089530309
pos_2566	-8.45302857928107e-05	0.000305566208535201	0.000112575766668237
pos_2567	-1.09342513601505e-05	-0.000341353536554419	0.000508006240071433
pos_2568	-0.00128585806599544	0.0032425508007581	-0.00539575440670642
pos_257	0.000320189870651542	-0.000284974870436672	0.000188619043762222
pos_2571	-0.000938954287007091	0.00485445000057759	0.00111284170496861
pos_2572	6.67720350098222e-06	-5.29864636729641e-05	0.000161801822316812
pos_2573	-0.000490105229519899	-0.000746993996240346	0.00214126576706911
pos_2575	0.00011759997530595	-1.58229741562984e-06	0.00025938253355267
pos_2576	0.000180710329352426	-0.00163970408385119	0.00134325344854334
pos_2577	-5.71195296893668e-05	-0.000464766353332609	8.64751158737691e-05
pos_2578	8.69209669604265e-05	-2.13632095755369e-05	-0.00013858002708162
pos_2579	0.000106559891175739	-0.000104468260555482	0.000152254057064677
pos_258	-0.000127744139720837	-0.00040294668220326	-0.000277821958915269
pos_2580	-0.00505230342838191	0.00288040706597645	-0.00623743623053402
pos_2581	-9.77940618488217e-06	-4.71236585952793e-06	3.94626095935116e-06
pos_2582	-0.000103026801032692	0.00044420556035356	9.02808255844432e-05
pos_2583	-0.000127314312039694	-0.000322603357337155	-0.000530260789143519
pos_2584	-0.00115749292526835	-0.00111787209493163	-0.000506808118334872
pos_2585	-0.000743557809786914	0.00236590392666973	0.000135827138797102
pos_2587	0.0016451831814656	-0.00176204460508157	0.00203843800072338
pos_2588	-0.000257415443831689	-0.00178618442829638	0.000941260015156745
pos_2589	-0.000371036151195007	0.00211701490925941	0.000150642116415487
pos_259	-0.000111252756572126	-0.000254404350578655	0.000326648258096347
pos_2590	-0.000322908087918323	0.00167134083162968	1.86420778177126e-05
pos_2591	-6.10570698353235e-05	0.000393154202599176	0.000183662927607937
pos_2592	5.31357837783136e-05	-0.000168806847936779	3.83144015406245e-05
pos_2593	-4.2964444810926e-05	-6.08123457699291e-05	-0.000137556251554683
pos_2594	-0.000471729049013491	-0.000854622124492963	-0.00177435669388929
pos_2595	0.000469807372168723	-0.0148487899619921	-0.0107756562316649
pos_2596	0.000116263834006276	-0.000278159214013632	0.000190834279889227
pos_2597	-0.000195199803446524	0.000671171960462816	-2.96415915496613e-05
pos_2598	-5.5480120259476e-05	0.000250720688161068	-7.33788770551879e-05
pos_2599	0.000105273209350021	-0.000198904858657379	-0.000543334114054382
pos_26	8.65933027092598e-05	-0.000924478493408529	0.000348757223491323
pos_260	7.20810733928992e-05	-0.00197424564540817	-0.0026234924513787
pos_2601	-2.43774895628559e-06	-0.000269422114728513	-0.000214281755655381
pos_2602	-1.63079547125896e-05	0.000122611082662577	7.12832825315504e-05
pos_2603	-0.000550958906662502	0.00013637022434691	-0.000511490200623503
pos_2604	-0.000211133557304759	-0.000421034129821231	0.000396229864953752
pos_2605	-0.000753236230150415	-0.00172323532971303	-0.00227262816420123
pos_2606	7.82760891730684e-05	-4.30537486707756e-05	6.48224271905989e-05
pos_2607	-0.00275000990624979	0.0058025211690562	-0.00569819488810982
pos_2608	-4.41166884674305e-05	-0.000153133003385184	-0.000376328362136701
pos_2609	6.43919857698335e-05	-0.000145860070077027	0.000271538357373115
pos_261	-0.000199545322099318	-0.00101977983674546	-0.00113789689423377
pos_2611	-4.55846127776954e-05	-0.00015141164759547	5.48823987903904e-05
pos_2612	-7.28669180297411e-06	-7.35075892742807e-05	-0.000112709539705152
pos_2613	0.00038161043809773	-0.0104579690528439	-0.00569010699582577
pos_2614	-1.05728290217929e-05	9.72500317644839e-06	2.61552467980328e-05
pos_2615	0.00137651379363647	-0.00276330774233922	-0.00195143325375617
pos_2616	-0.000527842411357239	0.000845253534149229	-0.000260085594204574
pos_2617	-1.64860413269375e-05	-0.000250931955649921	-0.000413925218064082
pos_2618	0.000208077337644595	0.000252490449382498	-0.00242333560852602
pos_262	3.3281626616896e-05	-6.43599998433968e-05	-0.000238655540538077
pos_2622	-0.0015911129854885	0.00140849243899444	-0.00612143108770052
pos_2623	0.000151944259351694	-0.000301740943145059	-0.000551372997289968
pos_2624	-1.39414330087488e-05	-0.000228894752813773	0.000515875955876103
pos_2625	-0.000136355739866936	0.000161658247317488	-0.000365841370086363
pos_2626	0.000182933852187188	-0.000508705211090932	0.000398426360903845
pos_2628	0.00414711786847145	-0.0129244749021526	0.00264889293147945
pos_2629	-0.000197710696688917	-0.00042749231744579	0.00094766250716724
pos_2630	-1.24779709408407e-05	-4.81296343932448e-05	-8.16765902669764e-05
pos_2631	-0.00010331189923533	-0.000300166425275163	0.000353129138028599
pos_2632	-0.00108326811481169	0.00378330664354307	-0.00522786532962182
pos_2634	0.00039948504596651	0.000221463760329811	-0.0023197494610972
pos_2635	0.0011715796250695	-0.00350200571279095	-0.00329144153102262
pos_2637	-0.00144580876709197	0.00730946990984495	0.00124977962875498
pos_2638	0.000417221872227966	-0.000457559153088732	0.00279461084962011
pos_2639	4.42174724359521e-05	-0.000339124788174635	-0.000130392977201162
pos_264	-0.000933013894280183	-0.00196922090628441	0.000888349362985898
pos_2640	0.00051357226737053	0.000193250434508788	-0.00109167335243467
pos_2641	0.000339708264466724	-0.000516476264888155	-1.85547367827657e-05
pos_2645	9.20779273533446e-05	-0.000228517653707291	0.000152266127884439
pos_2646	-5.41611695012575e-05	-0.00014806266428552	0.000237522982549291
pos_2647	-0.000152193086103984	0.000906416688883573	0.000192439334993041
pos_2648	-0.000528111545567702	0.00239536691316816	0.000466853662746093
pos_2649	0.000139330848067471	2.61364982589628e-05	-7.56388551358901e-05
pos_265	2.15957792562586e-06	-0.000207931257386438	-0.000142452351382342
pos_2650	-0.00360599552461593	-0.00572038823473001	0.00422067449193634
pos_2651	-0.00258426900938631	0.0138153683471038	0.00389067640004484
pos_2653	7.60776127738998e-05	0.000306665635031159	-0.000543745737741617
pos_2655	-0.000779372211395419	0.001862823978537	0.0018505744603801
pos_2656	-1.93757484358512e-05	-0.000297469070983253	-0.000144086446722236
pos_2658	-0.000734060829038843	-0.00355408655634243	-0.0045643700496144
pos_2659	-1.18962760263014e-05	-4.34421376011067e-05	-6.04613840277415e-05
pos_266	0.000351629532226781	-7.52518940735748e-05	4.14285726147551e-05
pos_2660	-0.00229369820211972	-0.000525869340751218	-0.0140325943371262
pos_2661	-0.00170360018740846	-0.0023391130105764	-0.00170691771612659
pos_2664	-0.000272193908224275	0.000239162855646191	-0.000319052657881917
pos_2666	-2.68244770741653e-05	-0.000385858086486689	-8.69219388695307e-05
pos_2668	-3.95632127445384e-05	5.11996370223148e-05	-7.61692001242724e-05
pos_267	3.46219995860957e-05	-0.000399513477918782	-0.000214404082452241
pos_2670	-0.00263672981263992	0.0152160366038123	0.00267580009562951
pos_2672	-0.000232493769283372	-5.76914919204226e-05	0.0225992392231033
pos_2675	-7.98117319698039e-06	4.29539889675168e-05	2.27230599053589e-05
pos_2678	1.52854051257117e-05	-3.38337498891146e-05	-2.90022492052659e-05
pos_2679	1.49944417973917e-05	2.91595310081058e-05	0.000116546351622957
pos_268	-0.000792897874222116	0.0021233332968965	-0.00167914582601717
pos_2680	-6.40469991191463e-06	-8.27739713728976e-05	0.000552647775922655
pos_2681	-5.88093194030668e-05	-0.000328893290714437	9.93201111695379e-05
pos_2682	-0.00110421857839455	0.00287737556662447	-2.63295034294201e-05
pos_2683	-0.000767601363752852	0.0013676891256173	-0.000822697400338526
pos_2684	5.65985053112639e-05	-0.00021194575098071	-5.59102420265942e-05
pos_2687	-0.00373497764805031	-0.0348554341404087	-0.0400975246842061
pos_2688	0.000342328022837978	-0.000446944487767129	0.000577890129380204
pos_2689	0.000880104093445368	-0.00110810104927303	0.00507400798351783
pos_2691	0.000277817809920812	-0.000419454857737064	0.000106515662213328
pos_2693	-0.000552243598170214	0.00234608621407528	0.000445593453297594
pos_2695	-0.0032116842803622	-0.00842800316486221	-0.00702172190014889
pos_2696	-3.85563530801853e-06	-9.85110918519853e-05	3.50205479986682e-05
pos_2697	-0.000710271884840371	0.000965963852653421	-0.00107697637170407
pos_27	0.010055719713867	-0.014313505978923	-0.00773789299448741
pos_270	0.00050706020792184	-7.24679426649061e-05	-0.00272438240505594
pos_2700	-0.000168580262522701	-0.000290819974963594	-0.000310581462274499
pos_2703	-0.000110066896691972	0.000536406013202448	7.77366988105111e-05
pos_2706	0.00289864282904393	-0.00850240310402577	-0.00267987397449088
pos_2708	-0.00020367719227367	-0.00034251048766076	-0.000289669669427483
pos_2709	-3.99103129457655e-05	0.000224904684264756	0.000328656622413727
pos_271	-0.00140732609487049	0.00201675558215553	-0.0108005786735094
pos_2710	6.71266546630633e-05	-6.21429820053555e-05	-7.25092883490875e-06
pos_2711	-3.29782605178424e-06	-6.57407631984224e-05	2.68947944131327e-05
pos_2712	0.000555019520784583	-0.0136502782816232	-0.00197333686571768
pos_2713	-5.28503158202797e-05	-0.000154312759184129	4.66145893784265e-05
pos_2714	-6.09093091371402e-06	-0.000200611268911479	-0.000148876240133406
pos_2715	-0.000210539018459425	0.000935063519246264	0.000132962771910331
pos_2716	-0.0030383140172776	0.00558887761715608	-0.00116931982075746
pos_2717	-5.58285837248782e-05	0.000177737403815953	4.34271895139184e-05
pos_2718	-0.000142490819359572	0.000215297548434661	-0.000183025969145687
pos_2719	-0.0028339546407718	0.0151186863135852	0.00252040732861216
pos_272	0.000174525323274376	-0.000518353118403809	0.000179742798447179
pos_2720	-0.000625954136312018	-9.15037617831187e-05	0.00226321991479543
pos_2721	-1.69548787133689e-05	-2.45477206285718e-05	-7.73269435355981e-05
pos_2722	-0.00010201115757911	-0.000335126385755472	-0.000375134020697773
pos_2723	6.20776615130677e-05	-5.20630307301662e-05	6.28312977608334e-05
pos_2724	0.00164113269295931	-0.00378535049399967	0.00628733426886746
pos_2725	7.22907174337958e-06	0.000167153743215863	4.16336142533797e-05
pos_2726	-3.15312640773473e-05	4.9001696931591e-05	-0.000133662235153175
pos_2727	5.95906862416152e-05	-7.52925662204845e-05	-0.000163614347844491
pos_2728	-0.00389001167795319	0.0114315759242899	-0.00100189731398907
pos_2729	-0.0001582253090496	-0.00116721187346519	0.000204043450111421
pos_273	-0.000399837488387226	-0.00084696286465012	0.00148782140843223
pos_2730	5.21019169626892e-05	-0.000108800025936018	-0.000451128514794861
pos_2731	2.07424768535765e-05	-3.29088854210422e-05	6.19499910415431e-05
pos_2732	1.20987234348117e-06	-1.43675530023772e-05	-1.15745640658526e-05
pos_2734	-2.26912781295131e-05	-0.000279689417001874	-0.000382243108925324
pos_2735	0.000108700902126963	-0.00160842899020221	0.00242848461337824
pos_2736	0.00857323507182215	-0.0050536459244029	0.000248844312731511
pos_2737	-8.94092721814674e-06	-0.000278201201701122	-0.000249841631335191
pos_2738	1.26645604305301e-05	4.33691761314289e-05	-0.000245322840798207
pos_2739	-9.46106950476125e-07	-7.31053194775428e-05	-3.07680668178147e-05
pos_2740	-0.00034365325729822	-0.00212392430250454	0.00148714564847124
pos_2741	-0.000159485860561858	-0.000371927565138204	0.000129146081825582
pos_2742	-0.000260813425188398	-0.00052475672488233	-0.000142084623090314
pos_2743	-0.000149614602289891	0.000175463289205944	-4.14416678803848e-05
pos_2744	-0.000107226957609268	-0.000513488725182648	-0.000148681028593318
pos_2745	-6.92642389013423e-05	-0.000276050249726009	-9.93029549017665e-05
pos_2747	-2.97329168443863e-05	-7.39562377183444e-05	-6.77865046224015e-05
pos_2748	-0.000962286094026138	0.00339061760563994	-0.000192624396668138
pos_275	1.50114150585694e-05	-8.72760973157279e-05	-0.000119638600648226
pos_2752	-0.000118791256711023	0.000518018807637212	0.000108280346227116
pos_2753	-0.000156509795615495	-0.000633366109432614	-0.0011534953891709
pos_2755	-0.000473114348369254	0.000820626769069789	0.0027692181396459
pos_2757	-1.74279812909544e-05	-0.000156546894570098	-0.000276751531560106
pos_2758	-0.00263439132798578	0.00856161667616546	-0.000674388373593769
pos_2759	1.03081742247209e-05	-0.000261919613827759	9.90940748336634e-05
pos_276	-3.95912083092011e-05	-0.00026177299576113	-0.000398219555292105
pos_2760	-0.000564744692026438	0.000530422709120367	-0.000627589500820728
pos_2761	-0.000858253460079565	-0.000787028299044618	0.00738917692512727
pos_2762	5.66218173229362e-05	-0.000438391548731176	-0.00025805645298395
pos_2766	1.04258167889399e-05	-3.7665091619215e-05	-1.39911556688152e-05
pos_2768	-0.000224618991535123	0.00155079262007406	0.000224906433291319
pos_2769	3.82944461962696e-05	0.000107111516226715	-7.236094256795e-05
pos_277	-0.000248898826534011	-0.00025022755513225	-0.000232852958519681
pos_2771	0.00400236721360633	-0.00451282672722734	0.00140314101819736
pos_2775	0.000480968911537416	-0.00468433488356594	-0.00224286679412417
pos_2776	0.00161961611569678	-6.38640395633697e-05	-0.000662977755497457
pos_2779	-0.00015878591696267	-9.07139885003384e-05	-3.47870994047911e-05
pos_278	-0.000138346192494612	-1.39659266694678e-05	-0.000851556745343314
pos_2780	-8.3197707744189e-06	-7.06010156933434e-05	-9.20757300847816e-05
pos_2782	2.27471786866498e-05	-5.47341644840191e-05	7.02250527078896e-06
pos_2784	-0.00118906590660065	-0.00597875937382048	0.00987115104343185
pos_2785	-3.43867618406572e-05	3.08551805132684e-05	0.000321509724822151
pos_2787	-0.000586956801591546	0.0022390828053802	0.000635430753488026
pos_2788	3.42343017403425e-05	-0.000210720604854642	-3.26089533309237e-05
pos_2789	-1.53537500977938e-05	-8.49702732155992e-05	-5.68499767841943e-05
pos_279	-0.00264764101003691	0.00406240447549399	0.0281039037071292
pos_2791	-1.86776652557172e-05	-7.4305825890853e-05	-3.48339516464938e-05
pos_2792	3.48118489375151e-05	-0.000142730463029323	-8.38578731255356e-05
pos_2793	-3.5963461781152e-05	0.00011479245688276	0.000156250831497232
pos_2794	-0.000148002443248538	0.000336892353584283	-0.000279826322560313
pos_2795	-4.81692147131026e-05	-2.38769044232851e-05	0.000101942631623858
pos_2796	2.79940988206166e-05	-0.000138620139638187	-2.19758327358738e-05
pos_2797	-0.00144814158921805	0.00411139617065565	0.000114396934514988
pos_2799	-0.000980101568417904	-0.0113766896505303	-0.0145360172690087
pos_28	-0.000471884455575019	-0.00161687785352593	-0.00122507008250535
pos_280	0.000380037194050864	1.43212695186266e-05	-0.000382279361694645
pos_2800	8.04105361784928e-05	-0.000352791427510197	-0.000186152660522266
pos_2801	-0.00109360176321004	0.00128904341743204	0.00582786602204192
pos_2802	5.45697549846816e-05	-0.000107983638124566	-0.00111100133394905
pos_2803	-0.000958610866428162	0.00442335142154845	-0.000137261356965017
pos_2805	-0.000200143766795812	0.00109378955719084	0.000273095115272154
pos_2806	-0.000961337987212739	0.00498893760359213	0.000893599654362888
pos_2809	3.81691852417046e-05	-0.000378212844641891	-0.000263650482374115
pos_281	-6.11445386920137e-06	-0.000101320455940653	-0.000124179298760685
pos_2810	-7.4942507066081e-05	7.5408189511495e-05	2.11421867702932e-05
pos_2811	-0.000199789750304895	0.000645918687043984	0.000125863745936412
pos_2812	0.000582112155874409	0.000103767574291735	-0.000431284452343387
pos_2813	1.2590756100564e-05	-0.000203989841250762	-0.000146634426811165
pos_2814	-0.00011946146297882	0.000372440414694824	0.000378750692025862
pos_2815	-0.000160026270507796	0.000214661001556186	0.000878217050194149
pos_2816	7.47725990907688e-05	-5.74006519231817e-05	1.50234856428989e-06
pos_2817	8.27933011400449e-05	-0.000323895221523276	-0.000597046248782686
pos_2818	-0.00700636021002864	-0.00950989620015898	0.00778581216491817
pos_2819	-3.91118101487435e-05	2.09060739923414e-06	4.71715299357979e-05
pos_282	-0.000150033735472872	-0.000425759218620149	-0.000353320205182837
pos_2820	-0.000519180593108974	0.00140497475713545	-0.00155816664012484
pos_2821	-0.00265577174050796	0.0105929412890022	0.00278575959715119
pos_2822	-1.37863997060706e-05	-0.000128211230520974	-0.000164282326983296
pos_2823	0.000123964666798177	0.000120489894285307	-0.000638629119400621
pos_2824	-5.16366588668563e-05	-2.10466611753679e-06	0.000322276844981171
pos_2825	0.000186684345041156	-0.000446282180826913	-0.000453721074703213
pos_2826	0.000651840350370767	-0.00248467352383226	-0.00191349524708851
pos_2827	-6.63540332585242e-05	-4.86320524468688e-05	-2.82325110441847e-05
pos_2829	0.00320435146112846	0.00475488506256785	-0.0312880530963782
pos_283	3.79017412734492e-05	-0.000101869253252208	5.31940576566471e-06
pos_2830	1.23590964804377e-05	7.83831737189888e-05	-8.27315805712179e-05
pos_2831	-0.000466690488195266	-0.00190264810266686	0.0125785654106171
pos_2832	-7.6766986232289e-06	-1.76663568933075e-05	4.45581244347503e-05
pos_2833	-1.97599350964122e-05	-6.48086371165365e-06	-1.56595134766231e-05
pos_2834	-0.0026812131028876	0.00842233506475645	-0.000540006884345281
pos_2836	-0.0034629636912965	0.0141135049003517	0.00568352777052739
pos_2837	1.31985191537358e-05	-0.000310901811259388	0.000102723153845349
pos_2838	0.00705535973362165	-0.00890749914162778	0.0208543719453239
pos_2839	-2.65540604903748e-05	-0.000304580767474284	-0.000320000488405852
pos_284	0.000139431894056263	-0.00110904190386472	-0.00018161295473502
pos_2841	-0.000471640571645414	-0.000400823887701546	-0.000483895784213735
pos_2842	0.00854703415103227	-0.0131162408168905	-0.00832822947793949
pos_2843	-4.48823984647476e-05	-0.000171094921951214	-0.00046522811999054
pos_2844	2.82161702436038e-05	-0.00067111931493786	0.000333366556988517
pos_2846	-0.00123008078967382	0.00247726871829738	-0.000967676179345134
pos_2847	-3.10582058042882e-05	-7.58354892306413e-05	-0.000105735506104241
pos_2848	-0.00222517750550777	-0.00495778858230488	0.00463591312454968
pos_2849	-0.000130471565248028	0.00037144226305029	-4.53413757013712e-06
pos_285	0.000868228541520749	-0.00315694352697449	0.00133063779970286
pos_2850	-2.54848084676895e-06	-9.11631296215247e-06	-2.40815175775529e-05
pos_2851	-0.000806267992349031	0.00383927672208778	0.000358203949689601
pos_2853	0.116883437929502	-0.0854465367139698	0.283588112264525
pos_2854	0.000127475780449637	-0.000410924784265141	-0.000485816874443626
pos_286	-0.000230183645190083	-0.00109006543044561	-6.58773276987174e-05
pos_287	0.00328245939373302	-0.00648039534900282	0.0155189188820098
pos_288	-0.000118450353895702	2.47978542767744e-05	-8.93949281216515e-05
pos_289	0.00493833578415986	-0.0109491225957924	0.0124625099388489
pos_29	-8.31120539830699e-05	-0.000571134795938315	-0.000832696413082354
pos_290	0.00053674077267516	0.00467509836532944	-0.00735044047876778
pos_291	-0.000290985987297921	-0.000653446254719206	-0.000581106318280057
pos_293	5.61432434652709e-06	1.23911164912353e-05	4.15512119836723e-05
pos_294	-0.000932065464086066	0.000378830796132699	-0.00136605765090561
pos_295	-0.00260282694649415	-0.0034506261677472	0.0237306861663607
pos_296	4.46799697992902e-06	5.29593579804909e-05	-3.17991399104201e-05
pos_297	-0.000382288795978021	-0.000143955244713379	-0.0033224938413439
pos_298	3.52397519870052e-05	-0.00012502008032865	-0.000391861053991421
pos_299	-0.000135477491737026	-0.000253672483403443	-0.000495090053170803
pos_3	0.0155792759950396	0.00630679028708747	0.00643733247244498
pos_30	0.0815406561697929	-0.0425992118594964	0.145519308805178
pos_300	0.000969187642117825	-0.0032016333504721	0.00847632671862084
pos_301	-0.0002062930492501	-0.00157633662732564	0.000333257823393783
pos_302	0.000614213599199113	-0.000222073838286536	-0.0031253143740546
pos_303	-5.90467398512518e-05	-8.83203690255666e-06	0.000347424215797268
pos_304	-5.88932973117514e-05	-0.000238808084348204	-0.000258606022679267
pos_305	0.000113020795559706	7.83850014893121e-05	-0.000753812510055516
pos_306	-0.0951040332359598	-0.223022837254017	0.275222790273498
pos_307	1.53165049010481e-07	4.80757220122587e-05	7.99883712654897e-05
pos_308	0.000371344220412227	-0.00039504488121878	0.00123087737315848
pos_309	-0.00366172812751317	0.0101491404919347	0.000764194367265174
pos_31	-0.0234425766061516	-0.0422115494553047	0.258601330927754
pos_310	-4.78654884575501e-07	8.25663060170747e-05	3.17381734529116e-05
pos_311	-1.43738927860259e-05	-5.68273456332931e-05	0.000281253332236477
pos_312	-4.0200980761931e-05	-1.70887472593408e-05	0.000298591406410007
pos_313	0.00016781738605988	-0.018451623206853	0.00291008838730287
pos_314	0.000158438605087978	-0.000158677634603082	0.000215255313145771
pos_315	0.000858860772100864	-8.49027290187217e-06	0.000251043089151548
pos_316	-0.000552212794865747	0.000457038811941094	-0.00204915431847171
pos_317	-7.87058860417593e-05	-0.0001509710753913	-6.33043945024903e-05
pos_318	-4.8711524813212e-05	0.000115218191771556	0.000200961498231952
pos_319	-0.000285875406238147	-0.000584257856086741	0.00164488041260376
pos_32	-0.000195703145795517	0.000653494054201208	-0.000493879718384105
pos_320	-4.24519255300496e-06	-0.000383788234007627	3.49078485256959e-05
pos_321	-0.021886644293451	-0.0169844651421309	0.127481382414446
pos_322	-0.0444107841008403	-0.105442313522384	0.0636542342811885
pos_323	-0.000115506210021735	6.06169767620296e-05	1.82618073863078e-05
pos_324	6.84675638695537e-05	-0.000180342747421582	0.000210688171425609
pos_325	7.50444023075563e-05	-0.000802174758057718	0.000492839708653266
pos_326	2.23952320142465e-05	7.95933976001742e-06	-1.63086540420015e-05
pos_327	0.000282641026333952	-0.000624787321789912	0.00140339244294248
pos_328	-0.00254951312289864	-0.00226491955759944	-0.0035195315840742
pos_329	-0.00104491091410759	0.00316709873977837	-0.00161677148870455
pos_33	-0.000222077392799096	-0.00229467914872636	-0.000116941025599279
pos_330	-0.000143963592062445	-0.000384103594733121	-0.000424014281243614
pos_331	-0.0011045013885601	0.00240966398964858	-0.000580591013728112
pos_332	-5.09637032119075e-05	-9.1880201079761e-05	0.000185707420041907
pos_333	-0.0311789174646841	0.135432657187575	-0.00328468932427826
pos_334	4.83782700138369e-06	-1.32292160036725e-05	9.23562861840713e-06
pos_335	-0.000123558714777088	-8.10649074261791e-05	-0.000203890462590496
pos_336	-0.00314126876399737	0.0103351292801077	-0.00270238884191181
pos_337	0.000456141457367152	0.000273956544906734	0.00015862848849434
pos_338	0.00343254303686201	-0.00460100386911301	0.000300632882430064
pos_339	6.32682202911307e-05	-7.36279366681842e-05	1.18382423349648e-05
pos_34	-1.50784396725027e-05	-0.000137992370066046	-0.000119574830720606
pos_340	0.000199639242659866	-0.000463807625341834	0.000720217066622049
pos_341	-0.00113235877402384	0.00348937586520163	-0.000380115131811996
pos_343	-0.0135345497751188	0.0241937258177918	-0.0214027230862322
pos_344	-5.59024752392031e-05	-0.000647520347187185	-0.000438726177872681
pos_345	-0.000161667246020259	-0.00118462746714587	0.000426426521501284
pos_346	-0.00260680118220237	-0.0478603229097174	-0.0409071840323039
pos_347	-8.59151897592398e-05	-0.00325356301853156	-0.00181988337959874
pos_348	-2.48926711812757e-05	0.000110568903137323	8.3600158493735e-05
pos_349	0.000446265261751747	-0.00131607689679995	0.00136393498400358
pos_35	0.024269129130882	-0.0148704040780422	0.0460991218263632
pos_350	0.000192320303209977	-0.00652572613725567	-0.00307202893128748
pos_351	-0.000730915433436445	-0.00192890085749778	-0.00253775812171932
pos_352	0.0160666291802289	0.0157790883736686	0.0798444032800218
pos_353	3.99683293251894e-05	6.53795788783883e-06	-0.000805632883419691
pos_354	-0.000791859630212208	-0.00160101899072083	0.000382819940972406
pos_355	-6.41850389198347e-05	-0.000161945382492165	0.000844428980212017
pos_356	0.00527693588332038	-0.00786079824835197	-0.00272350935070544
pos_357	0.000327322811774349	0.00200722140806002	-0.00461162038480408
pos_359	-0.00538420011678428	-0.0175982832504856	-0.002468295660591
pos_36	-1.81082620175026e-06	-2.51333907058786e-06	9.11077340717535e-06
pos_360	-0.000238132689344169	-0.00579733461140638	0.00117826020368463
pos_361	-4.16449111063927e-05	7.58609887679537e-05	-0.000156738406613958
pos_362	-0.0184025605641513	0.0269917329938179	-0.0659797458377254
pos_363	-0.000286505779686283	-0.00109759222727279	-0.00123840593671483
pos_364	-0.000577674661965014	-0.00124082114689826	0.00122056363895069
pos_365	0.000251531350253586	-0.00044579114841331	0.000544403807596925
pos_366	-0.000173722172443941	-0.000451634237405326	-4.78783117664191e-05
pos_367	-0.00024133979846044	-0.000762061955360946	0.00186725471197816
pos_368	-6.05038224427607e-05	-0.00276556288725916	-0.0119483724344598
pos_369	-5.03636766043426e-05	-0.000135404932399239	0.000206784331248289
pos_37	-0.000238760730874845	0.00285824509995523	0.000737326875769874
pos_370	-0.000532018413830813	0.000303602490673377	0.00321844291142873
pos_371	0.0010223266990853	0.000473324735861306	-0.00408691604514588
pos_372	6.38809329578622e-05	0.000121894898649328	-0.000238003347827052
pos_373	-0.00255963671193184	-0.00296634058134436	-0.0132941454895478
pos_374	0.00771857539375773	0.0024859857192608	0.00534371529817961
pos_375	-0.000972660047682037	0.00207020067515322	-0.0017181158782588
pos_376	-0.000516620735018145	0.00253179226570245	0.00379349593276662
pos_377	0.000124307998623036	-0.000419835795916444	-0.000751465111450555
pos_378	-0.00095619708801424	-0.00358041225981427	0.00265212276511414
pos_379	-0.00969618200972972	0.00158926168945394	-0.00787531933414784
pos_38	-0.0101128571678256	-0.0321956063168669	0.0689108942765625
pos_380	0.00178200913991641	-6.41273859358071e-05	-0.00434331326751858
pos_381	1.88536192183372e-05	-0.000122457246715742	-7.56302801679095e-06
pos_382	-0.000302128942542748	7.42890597812169e-05	3.57577530262766e-05
pos_383	0.000898170385137335	0.000360309415416778	-0.0016181533379967
pos_384	1.23753583119032e-05	-0.000235317015190338	1.72132760633592e-05
pos_385	-0.000887616556104588	-0.000574991533020313	-0.00133084649942663
pos_386	0.0063099107397671	0.0873563221416468	0.0276112829130672
pos_387	4.19929171766723e-05	-7.87597805416606e-05	0.000217408292546312
pos_388	0.00197448812971145	-0.0161629234148141	-0.00283901798418902
pos_389	0.000154144120819143	-0.000898732031684759	-0.000678417620138285
pos_39	-0.000307786128476862	-0.00057155068513615	0.00355298950191497
pos_390	0.000172310289360336	-0.00494775563905329	-0.00550986560939511
pos_391	-3.68812156395033e-06	0.000112518969217649	-0.00014396730294802
pos_392	0.0321047335551336	-0.108333005955251	-0.00485029199557896
pos_393	1.46488758346079e-05	-0.000222128077995327	-3.64102676816717e-05
pos_394	-1.87722534020342e-05	-0.00014149670228583	-5.46944534649502e-05
pos_395	-2.26348742156341e-05	4.35324159882588e-05	-8.40955377310011e-06
pos_396	-0.000862411033049801	0.0035827662916847	0.00229134186531651
pos_397	0.0250461378035851	-0.119543284056974	-0.0282483864694593
pos_398	-0.0885931621899305	-0.175884973815429	-0.0659832809463019
pos_4	-0.000228675340141221	-0.00125003645392238	0.00082778895118806
pos_40	0.0015016014861526	-0.00208765472568635	-0.00122110138644538
pos_401	0.000141321931517758	-4.73825669264211e-05	2.635470683095e-05
pos_402	0.000323219843150814	-0.000806208075451258	0.0024941665178017
pos_403	0.0190619662416577	0.013355426556451	0.00178650206228102
pos_404	-0.000585023483822968	2.71354683474409e-05	-0.000940128304711167
pos_405	-7.86978556546393e-05	3.93393385161923e-05	-0.000186145422730426
pos_406	0.00019950243892459	0.000530343360097474	-0.00194594748564733
pos_407	2.35511546048806e-05	-0.000119269582640345	-9.41041056181732e-05
pos_408	-0.000243184259382153	0.000495881511356189	0.000325153461424653
pos_41	8.77926590863927e-05	-0.00123956015219144	0.000897489339592868
pos_410	0.00279478526942649	-0.0204422965411222	-0.0157639338865067
pos_412	-9.47605707549484e-06	-3.22721994836936e-05	-2.82259316368009e-06
pos_413	0.00278216383448901	-0.00529624770845903	-0.00162479189810725
pos_414	-4.89619736288744e-05	-0.000173784662210148	6.88821436938198e-05
pos_415	2.0839585352895e-05	3.01575333701911e-05	-3.07896453411105e-05
pos_416	-0.00221180143809209	-0.00514160086158871	0.0103405347785127
pos_417	-0.000177858435739148	7.54176035248203e-05	-0.000886138610489622
pos_418	0.00259572324981664	-0.00487988523648396	0.00516836948944769
pos_419	-0.000647586277458043	-0.000761760489517496	-0.00135713965067214
pos_42	0.000956478459446209	-0.000957619712316415	0.000936355559403241
pos_420	0.000160577564799027	-9.53652446358742e-05	-0.000206661655807815
pos_421	-3.06511302571003e-06	-1.99478393837144e-05	-7.34959669702189e-05
pos_422	-4.23861541803942e-05	-3.9245905822769e-05	-0.000249861803304985
pos_423	-0.000477665141139492	0.000304921337996052	-0.000418759535380731
pos_424	-0.000137193661531319	-0.000130342001787633	7.74230676598467e-05
pos_425	-0.00177318805415555	-0.00710932906270399	-0.00778889408060831
pos_426	-0.000107545463696585	-0.000575617120089096	-0.000543856195539768
pos_427	-4.05993795767833e-05	-0.000100676803348398	1.41088600467999e-05
pos_428	-5.35428022687789e-05	-0.0001459198459114	-0.000307175687017124
pos_429	-0.00012768077324198	6.23332706654503e-05	0.000213296081780459
pos_43	-5.88533809990703e-05	-6.6183965236003e-05	0.000222954999477568
pos_431	8.52628319905415e-05	1.09149330819037e-05	2.80082486951242e-05
pos_432	-0.00249563141635134	-0.00700488748195563	-0.00361729093028199
pos_433	3.41509008227729e-05	-0.000319477553072172	-0.000549382119147895
pos_434	-0.000263081968209046	0.000881686730717956	-0.000455976791318262
pos_436	-2.13430261706735e-05	-9.48118754594941e-05	-0.000106012268872971
pos_437	-1.21817004025406e-05	-0.00016657346861899	6.30626834558048e-05
pos_438	-0.00019889531978557	-0.0002713381843273	0.00016216894086711
pos_439	-0.000270333763274545	-0.00145414309306166	-0.00095430346634288
pos_44	0.00229466448559242	-0.0250958868061678	0.0301532211952398
pos_441	-0.00011747933631436	0.000329647436920066	-0.000230414115061228
pos_442	-0.000350193522758225	-0.00193528799657714	-0.00211868975010122
pos_443	-0.000399772112778619	-0.000151046192033622	-0.000366846884500574
pos_444	-2.02414040091424e-05	-0.000539579310796833	-0.000706066592857639
pos_445	-0.00136865472481897	0.00310247797804424	-0.000284649573743274
pos_446	-0.00378354360008986	-0.00219457921484452	-0.0106483557894968
pos_447	-0.000121239962398946	0.000412007150849608	-0.000361128838805917
pos_448	0.00214242030083229	-0.0282015198554816	-0.00534160064533265
pos_449	-0.0026284701637981	-0.0407909608101735	-0.0224403437303206
pos_45	-0.00101587018160373	-0.0182242127338317	0.0120916821702644
pos_450	0.00100137716838008	0.00135468585736783	-0.0111444079772511
pos_451	4.1636430494655e-05	-0.000753668577857515	-0.00059729177559463
pos_452	-1.67093637065894e-06	-0.000114222981859731	-0.000155155438588242
pos_453	-0.00290983761290624	-0.00549208873293676	-0.00195899146291456
pos_454	0.000836198681490557	0.00255609611306637	-0.00943534421447759
pos_455	0.000703353992230549	-0.0101025988162799	0.00442566554635064
pos_456	0.000457894063894896	3.92539886829894e-05	-0.000713669337143597
pos_457	-0.000388747802264414	-0.00195453251165751	-0.00248927359953042
pos_458	-9.42968817053523e-05	-0.000136337407337275	-0.000273914700504328
pos_459	-1.21428746957182e-05	-4.13337366144019e-05	-3.13524612302529e-05
pos_46	3.72150349942029e-06	-6.13603428681128e-05	-3.71721543372605e-05
pos_460	2.5466160992485e-05	-0.000222994960265515	0.000410818057377452
pos_461	-0.000598985736153893	-0.00235878337259951	-0.00056742726773458
pos_462	-9.32252694203072e-05	2.57740054225618e-05	0.00122992066266168
pos_463	-0.00262113137732018	-0.00431021444882587	-0.00457314053634906
pos_464	4.16612574031561e-05	8.1031284662624e-06	3.94168504937094e-05
pos_465	-2.86034180022565e-05	-0.000506163211664136	6.52011083627984e-05
pos_466	-0.000150853624115057	-0.000858764204335524	1.62984739185511e-05
pos_467	-0.0251444980665883	-0.0437766719180731	-0.0327432004839139
pos_468	-8.7291760175242e-05	-0.000218573637401707	-0.00027404383479059
pos_469	-0.000908075283988812	-0.00155974003547935	-0.00134045398902374
pos_47	0.00358011952120732	0.00131951508271007	-0.0193366271629977
pos_470	-5.32209348146539e-05	-0.000337136402324901	-0.000146230203110389
pos_471	-0.000181780011937994	0.000181896185632784	0.0059314528863266
pos_472	-0.000389362502531684	-0.000774579613222599	-0.000976474682509227
pos_473	5.0109967636655e-05	-5.81788190058193e-05	0.000305829731240844
pos_474	9.14206640444755e-07	-0.000801038951016072	0.00137017495125854
pos_475	-0.00359557978193962	0.00449986906440747	0.0160895153302483
pos_476	-5.66108777870822e-05	-4.53305892628263e-05	-8.38291659381731e-05
pos_477	3.14111196572443e-06	-0.000126878824116608	-5.06603845058843e-05
pos_478	-0.000227622044453994	-0.000180126781664878	-0.000280998791229453
pos_479	-6.51666030305122e-05	-0.000377507608918842	-2.89184663782769e-05
pos_48	5.8382266285403e-05	-0.000160009406112624	-0.000244726114999124
pos_480	5.21658346652536e-05	-0.000261320209823378	-0.000166432135290874
pos_481	-7.52547649660254e-05	0.000247294973324661	-9.16444243802498e-06
pos_482	-0.00012699011380344	-4.97406117644215e-05	0.000310586771620724
pos_483	0.000311753666369849	-0.000123640052866618	0.000235208371808972
pos_484	4.17838281254315e-05	-0.000571620320395453	0.00134744315993464
pos_485	1.37823250725854e-05	1.6756072545947e-05	0.000221291540517369
pos_486	-1.25351102272821e-05	-0.000454680768650032	-0.00020275000831368
pos_487	-2.10146987434386e-05	-0.000110178732378202	0.000154512819272216
pos_488	-0.000394071176856622	0.000810260265941231	-0.000660730403734776
pos_489	-0.00357060369353416	0.00289072374056194	-0.00431770258543837
pos_49	-0.00252638856156069	0.00682706889681615	-0.00216197409177897
pos_490	0.00143918155261034	0.00110415014957483	0.00169118904246793
pos_491	-0.000130921877582433	-0.000444850436335931	7.32743535457201e-05
pos_492	-0.000113606356919122	-0.0012760999907915	-0.0013727845357498
pos_493	1.52256892320115e-05	-5.36614839236186e-05	-3.39538658101738e-05
pos_494	1.01127872863663e-05	-9.87857010815039e-05	6.40158413215392e-05
pos_495	-3.19117548810376e-05	-0.000258626340162798	9.22347022303267e-05
pos_496	-0.000507644788940008	0.00192648860334568	-0.00129010406833759
pos_497	0.00050284573996661	-0.000366389920576342	0.00264458216918752
pos_498	-5.44044311811124e-05	0.000324192885693062	0.000251309631980343
pos_499	0.000225782428738217	-0.00131925404703461	0.00221966346311276
pos_5	-8.06504501861006e-06	-0.00014087345290374	-0.000179351161511988
pos_50	0.000236645066777778	0.00103440280470846	-0.00104433872211142
pos_500	-0.00150713041194566	0.00343048592946596	-0.00029738135201158
pos_501	-0.000626993359334571	-0.000776456588394918	-0.000242287504137645
pos_502	-2.97415691627469e-05	-3.47661171860322e-05	2.05993510844534e-05
pos_503	0.000108360382895578	-5.55329274815624e-05	4.59846497242153e-05
pos_504	-0.000588713730250189	0.000618734706771903	0.000485479098171861
pos_505	-0.0075155967962049	-0.00484460163896669	0.0438675580434526
pos_506	8.19395880061328e-05	-0.00142313656514274	0.000372849688031157
pos_507	-0.000112721809070853	-0.000278438358685633	-0.000369448518608262
pos_508	-4.71918171965975e-05	-0.000110374663962598	-5.35334020028082e-06
pos_509	-2.19737088374014e-05	-8.19142293584949e-05	9.12395745780228e-06
pos_51	0.000675655498536457	-8.35282411604046e-05	0.000405634927435383
pos_510	-0.00550667880212499	-0.00879681132997364	0.0187755514846118
pos_511	-0.000942101282957467	0.000276815553856455	-0.00099717230051511
pos_512	-0.000161661691482815	-0.000328521656194141	-0.000390323779687636
pos_513	0.000556790591779811	-0.00041360690637949	-8.79296327414506e-05
pos_514	0.00103156310308998	-0.00182860333610263	0.00268140295175234
pos_515	-9.14928682800361e-05	-0.000241574445579739	-1.22291052419509e-05
pos_516	0.000146548835808736	9.44263020151477e-05	-0.00011441313234603
pos_517	-0.000727863857222144	0.00263210234057211	0.000756102880629608
pos_518	4.34398499800176e-05	0.000233063394889709	-5.21067573020369e-05
pos_519	1.81458738507547e-05	4.8646483488328e-05	4.96945549830734e-05
pos_52	0.000718558675505995	-0.00273231409168733	0.0053903441803547
pos_520	0.00429787623544877	0.000337930139033795	-0.00224747354003554
pos_521	-2.61272121889388e-05	-0.000282554672048778	-0.00021538714637852
pos_522	0.000238192940906624	-0.000187682682800266	-0.000246713121835736
pos_523	-0.000242647762172149	-0.00108035789846168	0.00271032298289021
pos_524	-5.05136959426929e-05	-0.000118117043442432	0.000201747077870882
pos_525	0.000292360779115709	-0.000433052633900793	0.00120242943231309
pos_526	-2.77156701167695e-05	-4.35169015068311e-05	-8.8882571002657e-05
pos_527	-0.000797654390021268	0.00346388037193244	0.000359849756379426
pos_528	5.45084844054726e-05	-0.000172229766812584	0.000585521530121683
pos_529	7.6654924308472e-06	-0.000136913161332444	0.00020094373161842
pos_53	-4.5537779405169e-05	9.97769491470257e-05	-4.1713438203252e-05
pos_530	-1.95612571994169e-05	0.000117804633726436	0.000318431311702656
pos_531	5.48613308350058e-05	2.74332455830793e-06	-0.000447957991995857
pos_532	-0.0002505737782108	0.00113700747492934	0.00931311617632906
pos_533	4.98181247167912e-05	-4.49990382761255e-05	-0.000167828947450436
pos_534	-0.000495579597860679	-0.000916057988190337	7.11147883405437e-05
pos_535	-0.00038976287203907	-0.000808139230459986	-0.000713915079135235
pos_536	-9.14822664381543e-05	-5.76950952710248e-05	2.9107005123135e-05
pos_537	-0.000234782221573952	0.000519935230483464	-7.86464872182745e-05
pos_538	-1.42672883824248e-05	-0.000124164105233785	7.41436498998542e-05
pos_539	0.00302868218417087	0.000756170670989614	-0.00110765825570397
pos_54	-0.000242217540004279	-0.000684221794996044	0.000175134281955566
pos_540	9.43450649772584e-05	-0.000138926938091033	-0.000263202720483189
pos_541	1.53362625542563e-05	-0.000130684723272362	0.000356783986514797
pos_542	-5.84171476009803e-05	0.000128270269583814	-0.000105199313469965
pos_543	0.000301545618364241	-0.000428602420403878	-0.000729103545414897
pos_544	-4.11848286332718e-05	-4.70525182795952e-05	-4.16549960222042e-05
pos_545	-0.000330743315235156	0.00181106264422852	0.000285047900848876
pos_546	-0.00412625368359857	0.00383854636241278	0.0151374592119672
pos_547	-0.0153774583359281	-0.0610480762149958	-0.0314071844771143
pos_548	-0.000128159147959561	-0.00058473417503325	-0.000567813538758999
pos_549	-0.0112368354814711	0.036288850214784	0.00384419488326804
pos_55	1.07052665909119e-05	-0.000179830302636662	4.20281065678239e-05
pos_550	0.00398596345827593	-0.00295155695188529	-0.00937451380371142
pos_551	-0.000538995720464944	0.00241074839479531	0.00036478967454481
pos_552	8.24399421399493e-05	3.44410301702583e-05	0.00010074451633256
pos_553	0.000489344699994	0.000470188304367034	-0.000523818754724341
pos_554	-9.17161683798077e-05	-0.000934513013809915	-0.00150919968526441
pos_555	5.33822013906321e-05	-8.82864223321916e-05	0.000167985646508038
pos_556	0.000566324175402453	-3.26258103169845e-05	-0.0035666978414999
pos_557	5.8666836883212e-05	-0.000160738061843331	0.000143107969131167
pos_558	0.00345626262048088	-0.00714162319498969	0.00356152328766524
pos_559	3.47260885968769e-05	-3.15216294687192e-05	-7.12761106316859e-05
pos_56	0.000563633101771865	-0.000999069268809751	-0.00137853622513678
pos_560	-3.44870756384259e-05	-0.000490900666968501	0.00104459837106151
pos_561	-1.45172525403721e-05	-2.18841689455338e-05	4.45588683327134e-05
pos_562	-0.000942547231874215	-0.00133229881009619	0.00118465009744455
pos_563	0.000380826095995432	9.19258201318995e-05	6.74609547717205e-05
pos_564	-4.87133595912388e-05	9.68965980586663e-05	2.44415209686393e-05
pos_565	9.42678421093261e-05	-1.07324465121541e-05	-0.000281014101785442
pos_566	-8.68223517274181e-05	5.46266626525125e-05	0.000345334625495995
pos_567	8.66395204807872e-05	-0.000810414782223392	-0.000270421431846794
pos_568	1.68750280403956e-05	-2.66881908438734e-05	5.49421357305272e-05
pos_569	-2.72704212591536e-05	-6.02707858800311e-05	0.000322668837219508
pos_57	0.00455466149240886	0.00213857534255117	-0.00123614054120409
pos_570	0.00039032027990646	-0.000337636801869322	-0.000949307811408414
pos_571	-3.57413764082807e-05	-6.8163119423682e-05	3.13731293600942e-05
pos_572	0.00176098336243764	0.0167157400470177	-0.0207719337783009
pos_573	-5.79005556576461e-05	0.000118784279835129	-9.02927764336591e-05
pos_574	0.00174924654423748	0.00104390292249024	-0.00960342212855855
pos_575	-3.70372889812655e-05	-0.000141050354901272	-0.000353763614261461
pos_576	4.82814609824472e-05	8.54200465988825e-05	-4.32779768896649e-05
pos_577	0.000169028570469618	-0.000468203493202309	0.000811307922644069
pos_578	-0.000291642960233643	0.000471861244528204	-0.00119992899632681
pos_579	0.0360796479505092	0.00860630078415125	0.00429364784888896
pos_58	-0.000875232540062832	0.00159270488441043	-0.00265060407858528
pos_580	5.91619990936586e-05	-4.28587646859088e-05	2.08893756696431e-05
pos_581	6.29185355701102e-05	-3.42241733491143e-05	0.000381239088037362
pos_582	0.000820564087427773	-0.00219892937509361	0.0045341252745141
pos_583	0.00122862667642348	-0.00402242678559291	0.0115872857403616
pos_584	0.000250546536905836	-0.00110962130549394	0.0065111175581946
pos_585	0.00933181590521919	-0.00596767173689659	-0.00828732519566549
pos_586	0.000111668702603135	8.14621841947156e-05	-0.00025707448088187
pos_587	-1.81534222330504e-05	-0.00184417660361435	-0.000538559207980118
pos_588	-0.000710862800676848	-0.00197413119677919	0.00758690509696468
pos_589	6.66646775610661e-05	-0.000161199990763167	0.000298043795357697
pos_59	-0.0381271585328016	-0.0576567862134089	0.155746287158516
pos_590	-5.92324057807845e-05	-0.000198252572196626	-0.000244127765294103
pos_591	-0.00839283351787726	0.00964076047543872	-0.0116611630261649
pos_592	-0.00171804553728299	0.00499753714897882	0.00123693417265654
pos_593	-0.000697724393208602	-0.00101533521167304	0.00519326380830131
pos_594	8.08061926175948e-05	-0.000112495942019144	0.000404816303614587
pos_595	0.000313185954298101	-0.000463675527016371	-0.000137069271575478
pos_596	-0.000748413381972425	0.00208743552784953	0.00394487181536067
pos_597	-0.00300146631618703	-0.0175293054778164	-0.0252623472041719
pos_598	-0.00912553105974047	-0.0806367333336851	0.037786820455508
pos_599	-3.59838803994232e-05	-0.000664848162898033	-0.000254245852700969
pos_6	0.496488787868192	0.160838276559547	-0.420865175460017
pos_60	-0.000934913329943301	-0.00197274789200962	-0.000722573145529567
pos_600	1.98133824739249e-05	-0.000117828003310158	9.81491205224682e-05
pos_601	3.38331166103908e-05	-2.23727622792275e-05	0.000114251360030844
pos_602	-2.83829469003286e-05	0.000144882099784978	1.90809841231411e-05
pos_603	-2.78330845860399e-05	-3.07292672876622e-05	2.73510119141845e-05
pos_604	-0.00021189245196359	0.000400002788348046	0.00158167918379117
pos_605	-0.00143657851919173	0.00218496386211371	-0.0040021812709656
pos_606	-0.000626889388051333	-0.0011544156240447	0.00113009032364886
pos_607	7.61567592850133e-05	2.86240726315019e-05	-0.000461986570289978
pos_608	1.84243011368513e-05	0.000114053796196639	-0.0003993853493615
[truncated: 401 more rows]
