# Supplementary material for: Multi-omics analyses reveal that the gut microbiome and its metabolites promote milk fat synthesis in Zhongdian yak cows
Source: PeerJ journal article supplement (doi:10.7717/peerj.14444), 2022-12-02
Supplement: biomarker_Web_Report_.zip [file diff_result.xls]

指标名称	评价标准	是否达标
<a href="#t2">差异数目最大值</a>	≥10	<font color="#00cc00">yes</font>
