# Supplementary material for: Multi-omics analyses reveal that the gut microbiome and its metabolites promote milk fat synthesis in Zhongdian yak cows
Source: PeerJ journal article supplement (doi:10.7717/peerj.14444), 2022-12-02
Supplement: biomarker_Web_Report_.zip [file Diff_Venn_Intersection.xls]

ID	Name	H_vs_L
pos_2226	3-Oxooctadecanoic acid	1
pos_2217	7-Chloro-3,4',5,6,8-pentamethoxyflavone	1
pos_2850	Sinapyl alcohol	1
pos_1999	N-Despropyl-rotigotine	1
pos_2122	6,7-dihydro-12-epi-LTB4	1
pos_2482	Thyrotropin releasing hormone	1
pos_2726	Sorbic acid	1
pos_2568	Ramontoside	1
pos_663	Myristic acid	1
pos_2660	Isolinderanolide	1
pos_321	Pro Ile Leu Ile	1
pos_1150	1-Acetoxy-2-hydroxy-16-heptadecen-4-one	1
pos_2142	3-carboxy-4-methyl-5-propyl-2-furanpropanoate	1
pos_1720	N-arachidonoylglycinate	1
pos_1820	Edulisin I	1
pos_2280	3-(Acetyloxy)-2-hydroxypropyl octadecanoate	1
pos_2192	PS(DiMe(11,5)/DiMe(13,5))	1
pos_2027	(3b,6a,12b,17a,20S)-Dammar-24-ene-3,6,12,17,20-pentol 20-[glucosyl-(1->2)-[rhamnosyl-(1->6)]-glucoside] 6-xyloside	1
pos_279	SWIETENINE	1
pos_1370	FMNH2	1
pos_1927	Glutamyl-Lysine	1
pos_1834	(Z,Z)-2,9,16-Heptadecatriene-4,6-diyn-8-ol	1
pos_2327	alpha-Micropteroxanthin B	1
pos_171	6-Methyl-3,5-heptadien-2-one	1
pos_2841	Famciclovir	1
pos_1534	2-Methyl-3-(2-pentenyl)-2-cyclopenten-1-one	1
pos_1509	PE(22:5(4Z,7Z,10Z,13Z,16Z)/dm18:0)	1
pos_760	6beta-hydroxybudesonide	1
pos_1434	Salviaflaside	1
pos_1502	Ganglioside GA2 (d18:1/16:0)	1
pos_963	Permetin A	1
pos_169	1,5-Octadien-3-one	1
pos_1572	(R)-Laudanidine	1
pos_996	Capsianoside II	1
pos_1249	Quinquenoside III	1
pos_1676	Ginsenoyne N	1
pos_2158	PE(22:6(4Z,7Z,10Z,13Z,16Z,19Z)/24:1(15Z))	1
pos_2057	N5-Acetyl-N2-gamma-L-glutamyl-L-ornithine	1
pos_1857	DG(18:4(6Z,9Z,12Z,15Z)/22:2(13Z,16Z)/0:0)	1
pos_1475	1-Hydroxy-1-phenyl-3-octadecanone	1
pos_2196	Pectenotoxin 3	1
pos_1549	4-Methyl-2-pentyl-1,3-dioxolane	1
pos_818	Avocadene 1-acetate	1
pos_866	N-Oleoylethanolamine	1
pos_311	Cystophorene	1
pos_1633	Tetracosahexaenoic acid	1
pos_605	Trifolirhizin	1
pos_375	Isobutyrylmallotochromene	1
pos_2565	Phytosulfokine b	1
pos_84	GATIFLOXACIN	1
pos_2218	Bilirubin diglucuronide	1
pos_496	Rishitin	1
pos_1381	Araliasaponin III	1
pos_1347	1(10),11-Eremophiladiene-2,9-dione	1
pos_529	5-Aminopentanal	1
pos_2025	Nb-p-Coumaroyltryptamine	1
pos_840	DG(20:3(5Z,8Z,11Z)/22:6(4Z,7Z,10Z,13Z,16Z,19Z)/0:0)	1
pos_849	24-Oxo-1alpha,25-dihydroxyvitamin D3	1
pos_2622	4-(Hydroxymethyl)benzenediazonium(1+)	1
pos_367	Thr Asn Thr Asn	1
pos_2560	DG(18:1(11Z)/22:5(7Z,10Z,13Z,16Z,19Z)/0:0)	1
pos_2221	Matsutakic acid A	1
pos_1878	(±)-Rollipyrrole	1
pos_1908	Calendasaponin B	1
pos_1662	Linoleoyl ethanolamide	1
pos_2712	Capsianoside IV	1
pos_1143	PE(15:0/20:2(11Z,14Z))	1
pos_1	D-erythro-Dihydrosphingosine	1
pos_1433	3-Hydroxy-1-phenyl-1-hexadecanone	1
pos_1073	Neolinustatin	1
pos_1781	1-Caffeoyl-5-feruloylquinic acid	1
pos_2239	CDP-DG(16:0/22:6(4Z,7Z,10Z,13Z,16Z,19Z))	1
pos_2554	Melongoside O	1
pos_268	PYRITHYLDIONE	1
pos_1877	Albigenic acid	1
pos_1180	Ustiloxin B	1
pos_83	8Z,11Z,14Z-heptadecatrienoic acid	1
pos_1917	3'-Deaminofusarochromanone	1
pos_39	Choline	1
pos_2339	Catechin 3',5-diglucoside	1
pos_286	4-(2,6,6-Trimethylcyclohexa-1,3-dienyl)but-3-en-2-one	1
pos_1432	Goshonoside F3	1
pos_578	2-Methyl-2-cyclopenten-1-one	1
pos_488	3,4,5,6-Tetrahydrohippuric acid	1
pos_1376	Brassicoside	1
pos_659	Stearidonic acid	1
pos_644	Isomasticadienonalic acid	1
pos_1248	Cerebroside B	1
pos_1653	3,8-Dihydroxy-6-methoxy-7(11)-eremophilen-12,8-olide	1
pos_137	2,6,6-Trimethyl-2-cyclohexene-1,4-dione	1
pos_2820	1,3-Dipropyl-8-cyclopentylxanthine [DPCPX]	1
pos_568	2-Butyl-3-phenyl-2-propen-1-al	1
pos_58	Gln Val Asn	1
pos_2587	Lettucenin A	1
pos_2448	2-Methyl-1-methylthio-2-butene	1
pos_742	N-acetyl-5-methoxykynuramine	1
pos_1141	Isovalerylglutamic acid	1
pos_698	3-keto Fusidic acid	1
pos_555	Jasmolone	1
pos_340	Norchelerythrine	1
pos_736	2-Methylpropyl formate	1
pos_2388	Omega-Carboxy-trinor-leukotriene B4	1
pos_692	IV2Fuc-nLc4Cer	1
pos_108	RHOIFOLIN	1
pos_1270	PC(14:1(9Z)/22:5(4Z,7Z,10Z,13Z,16Z))	1
pos_177	Sorbaldehyde	1
