# Supplementary material for: Multi-omics analyses reveal that the gut microbiome and its metabolites promote milk fat synthesis in Zhongdian yak cows
Source: PeerJ journal article supplement (doi:10.7717/peerj.14444), 2022-12-02
Supplement: biomarker_Web_Report_.zip [file H_vs_L.KEGG.xls]

#KEGG_n	9	KEGG_N	231
#Pathway	ko_ID	Diff_Metabolites_in_Pathway	All_metabolites_in_Pathway	Diff_Mtabolites_in_All_pathways	All_Metabolites_in_All_pathways	Metabolite_id	KEGG_Orthology
ABC transporters	ko02010	1	23	9	231	pos_39	C00114
Metabolic pathways	ko01100	7	159	9	231	pos_39;pos_2850;pos_663;pos_1;pos_2218;pos_529;pos_1370	C00114+C02325+C06424+C00836+C05787+C12455+C01847
alpha-Linolenic acid metabolism	ko00592	2	12	9	231	pos_83;pos_659	C16344+C16300
Cholinergic synapse	ko04725	1	3	9	231	pos_39	C00114
Fatty acid biosynthesis	ko00061	1	5	9	231	pos_663	C06424
Choline metabolism in cancer	ko05231	1	9	9	231	pos_39	C00114
Sphingolipid signaling pathway	ko04071	1	4	9	231	pos_1	C00836
Glycine, serine and threonine metabolism	ko00260	1	5	9	231	pos_39	C00114
Bile secretion	ko04976	1	12	9	231	pos_39	C00114
Lysine degradation	ko00310	1	7	9	231	pos_529	C12455
Glycerophospholipid metabolism	ko00564	1	13	9	231	pos_39	C00114
Porphyrin and chlorophyll metabolism	ko00860	1	5	9	231	pos_2218	C05787
Riboflavin metabolism	ko00740	1	1	9	231	pos_1370	C01847
Sphingolipid metabolism	ko00600	1	3	9	231	pos_1	C00836
