# Supplementary material for: Multi-omics analyses reveal that the gut microbiome and its metabolites promote milk fat synthesis in Zhongdian yak cows
Source: PeerJ journal article supplement (doi:10.7717/peerj.14444), 2022-12-02
Supplement: biomarker_Web_Report_.zip [file H_vs_L_diff_heatmap_nonclustered_samples.xls]

#ID	Name	H5	H4	H2	H6	H1	H3	L1	L5	L4	L2	L6	L3
NA	Goshonoside F3	7.42032617588857e-05	7.0393814916351e-05	7.65688896979071e-05	7.12186968812788e-05	5.59293455279314e-05	8.25044088866702e-05	6.17093190887472e-05	7.04236711333495e-05	5.44749631189395e-05	6.05704270500826e-05	5.95658368497939e-05	6.50439455868172e-05
NA	PC(14:1(9Z)/22:5(4Z,7Z,10Z,13Z,16Z))	6.1357186610487e-06	2.08103996091174e-06	6.88064879033784e-06	1.77380669725318e-06	6.87083562982464e-06	1.18578102874268e-05	2.27158870131552e-06	7.85798908996056e-07	1.58358658921546e-06	2.39117913289514e-06	0	4.35514326331569e-06
NA	Glutamyl-Lysine	0.0110423999920611	0.00679009668278375	0.00645656766729617	0.00795290404372468	0.00824769522277654	0.0108089688380562	0.00528452113251467	0.00576137187116136	0.00728689010436488	0.00515252143144847	0.00599918616472132	0.00682219592238915
NA	Sinapyl alcohol	2.93402333035816e-06	4.24618997800066e-06	3.43483264302417e-06	3.22845288581625e-06	2.93895229296932e-06	1.65005767705157e-06	2.52576615315859e-06	1.88595495929847e-06	2.25276779062976e-06	2.07267745794393e-06	1.6094710083322e-06	1.99334726831587e-06
NA	Edulisin I	0.000233921772395635	0.000304810735446982	0.000261108258228178	0.000241912534329992	0.000293776266539317	0.000102898963993551	8.86960650881635e-05	0.000131180981887268	0.000133518097459212	0.000208691657446914	0.000138510136732917	9.46055752621127e-05
NA	Famciclovir	4.20809602478822e-05	7.88257821141631e-05	7.79301196029486e-05	5.68241468993315e-05	6.25272210181293e-05	2.39634942807885e-05	1.32926293037135e-05	3.71409500485301e-05	4.41060027706796e-05	4.37400872640401e-05	2.67037312642742e-05	8.54379418460404e-06
NA	N-acetyl-5-methoxykynuramine	1.6642613264265e-05	2.07909980478647e-05	1.8589651326806e-05	1.62005907049012e-05	1.62643856475737e-05	1.0782355748511e-05	1.11417806322752e-05	1.22014310825296e-05	1.4595352741914e-05	1.38443909185062e-05	1.26714265047982e-05	1.079001269186e-05
NA	Capsianoside IV	0.00239966783715559	0.0032660544839504	0.00267564377796986	0.00242457126650391	0.00215927681048513	0.00243532561413788	0.00177342837750843	0.00216475594622591	0.00189341800964783	0.00213195982153504	0.00222675373925636	0.00242878928105859
NA	D-erythro-Dihydrosphingosine	0.00016750424081482	0.000254417617725337	0.000280516099889959	0.000200086248543327	0.000143373613404701	0.000224718909490409	0.000130812981686961	0.000157863228276111	0.000127429588182838	0.000139869306485217	0.000141074891906182	0.000124289239886146
NA	Linoleoyl ethanolamide	1.01236618399633e-05	1.24195061970836e-05	1.1984695330253e-05	1.10536026872802e-05	1.04558333504073e-05	1.09375573644376e-05	7.87724213085164e-06	9.17628165015446e-06	1.02609217450509e-05	1.07733449820655e-05	8.79488281743722e-06	7.73941146716757e-06
NA	DG(18:1(11Z)/22:5(7Z,10Z,13Z,16Z,19Z)/0:0)	1.16357941017589e-06	1.94869876836947e-06	8.53022028763727e-06	4.29079676881982e-06	3.35700459685172e-06	3.18313477722567e-06	0	1.99472937528883e-06	1.59622090187457e-06	0	0	1.09662460070409e-06
NA	Isolinderanolide	0.000708515080854387	0.000858095258630156	0.00110541648391961	0.000600578363215533	0.000967462485582657	0.00107242445931698	0.000788641314976542	0.000646529558374018	0.000629645824067759	0.000635516823561436	0.000659991114355796	0.000630607256323466
NA	N-Oleoylethanolamine	7.13415733671289e-05	9.55386692036802e-05	0.000130956325831409	6.74589033685474e-05	0.000102814196232674	0.000118175052445121	8.91995288084702e-05	6.31495034349558e-05	5.58449205575878e-05	6.22681335639282e-05	6.99830976775714e-05	5.9759937705342e-05
NA	Calendasaponin B	3.46795220020815e-05	3.20705248359784e-05	4.15257327742404e-05	2.65541554270807e-05	6.62961648231401e-05	4.12751908370587e-05	2.94412644439757e-05	1.88076684602546e-05	2.38587833094869e-05	2.31711022761307e-05	1.52433673859452e-05	1.81368316413224e-05
NA	PS(DiMe(11,5)/DiMe(13,5))	7.85400181601917e-05	5.32899373656628e-05	0.000110663171587337	7.82204022482555e-05	0.000135497673892434	0.00010003151668548	5.45468381921281e-05	4.64403051174801e-05	4.8052170767097e-05	6.44341042307777e-05	4.77398796837856e-05	7.07693234307901e-05
NA	Cerebroside B	2.09961928551289e-06	1.07254822091939e-06	1.91119367320607e-06	5.61763743287234e-06	7.27937688743303e-06	2.80738716624481e-06	1.09353927396022e-06	9.35717321816451e-07	0	0	8.4742868203384e-07	2.08240165138295e-06
NA	3-Hydroxy-1-phenyl-1-hexadecanone	0.000351826523135804	0.000254614809597739	0.000235444025996873	0.000367281203785349	0.000518425994795781	0.000301407774482569	0.000233289164279591	0.000309627291370091	0.000142679032145728	0.000159529846376317	0.000248133412945093	0.000241269437658232
NA	Isobutyrylmallotochromene	8.6900281123637e-05	0.000136197273282615	0.000125720434885379	0.000136383312035498	0.000195677340198524	9.40998399727389e-05	4.88696830581599e-05	8.04176241587173e-05	8.59308028173874e-05	5.47712094406931e-05	8.30628216582262e-05	0.000128650303897588
NA	3,4,5,6-Tetrahydrohippuric acid	3.05201500534651e-05	4.49337430873169e-05	4.09865495504691e-05	2.64886035950766e-05	6.98920634425824e-05	1.49808863385266e-05	1.74165335741013e-05	1.85321853357624e-05	2.30889065246238e-05	1.62246274066655e-05	1.29083499541467e-05	1.54005902531664e-05
NA	GATIFLOXACIN	6.38969723660283e-05	7.57378118982191e-05	0.000115119789983944	8.39768884581726e-05	0.000182017368520405	2.06267576056499e-05	2.73129974765128e-05	2.1694430647646e-05	6.54968220420819e-05	1.02688430477963e-05	7.16620742177369e-06	1.33932084155007e-05
NA	(Z,Z)-2,9,16-Heptadecatriene-4,6-diyn-8-ol	1.01149832115804e-05	3.76702358034263e-06	6.25310223604237e-06	5.11569007523731e-06	2.64768517463062e-06	3.4404814179057e-07	3.30834818012272e-07	4.1644510230494e-07	6.07781045097487e-07	3.41886783988525e-07	7.31359577874189e-07	3.76551337480178e-07
NA	4-(Hydroxymethyl)benzenediazonium(1+)	0.000282023754933637	0.000171108038970938	0.000334610066031765	0.000232323787068686	0.000301122915944176	5.09358593701699e-05	0.000146576333712696	0.000110759982737507	0.000184742180379443	7.60022149223299e-05	7.21170875134866e-05	6.69713239542355e-05
NA	3,8-Dihydroxy-6-methoxy-7(11)-eremophilen-12,8-olide	8.88643537148372e-06	4.53849361562092e-06	8.57988856873519e-06	5.93706403160147e-06	6.06324947033425e-06	1.26511166039424e-06	2.15225514203341e-06	1.49648939819358e-06	5.84955415754121e-06	1.60317723886771e-06	1.19583604818397e-06	1.20357869491511e-06
NA	7-Chloro-3,4',5,6,8-pentamethoxyflavone	4.12308757833539e-05	1.74835049950224e-05	4.35368822175474e-05	2.40837821661211e-05	3.50411173562552e-05	3.25983293520926e-07	1.20898727267271e-06	5.93522047948137e-06	2.19966285201795e-05	6.98450245997044e-06	2.30131437801194e-06	3.63275017897762e-07
NA	3-carboxy-4-methyl-5-propyl-2-furanpropanoate	0.000628584383162663	0.000304212906614103	0.000652552452454275	0.000411832961233399	0.000578744580310164	3.61347431796016e-05	3.94080373704698e-05	9.65743642621704e-05	0.000313834577719133	3.91212298098121e-05	4.0204140868438e-05	3.9624726298035e-05
NA	Sorbic acid	6.3111508135066e-06	2.64767465405844e-06	6.0007016439007e-06	4.25095002201264e-06	5.8069857317188e-06	3.38439851025723e-07	4.76183283719477e-07	1.00734504411042e-06	3.49093648047599e-06	5.03961231750085e-07	6.41862472184432e-07	4.98726197099223e-07
NA	6-Methyl-3,5-heptadien-2-one	0.000154594245890527	7.36182320650965e-05	0.000152712851748616	0.000106074078167348	0.00015727986599281	9.02602190435668e-06	6.56725330852377e-06	2.62328037146796e-05	8.77134152610845e-05	1.20708137270274e-05	9.95783215804234e-06	1.09637230685815e-05
NA	2-Methyl-2-cyclopenten-1-one	5.23913205674296e-05	2.40572886170949e-05	5.14476343591422e-05	3.63520918933274e-05	5.17078771364461e-05	2.64599744654588e-06	1.95384253080134e-06	8.2105151227664e-06	2.83574841912859e-05	2.55969856939223e-06	2.82106061566809e-06	3.7919636745499e-06
NA	2-Methylpropyl formate	9.55484734785898e-05	5.85902738638851e-05	0.000101917000749561	7.95304484676048e-05	9.33700879949189e-05	8.04430295528371e-06	6.51235243010823e-06	2.40885191279982e-05	7.40526928333921e-05	5.70906927610043e-06	8.16954530371788e-06	1.1595345672377e-05
NA	Phytosulfokine b	1.31091222232293e-05	9.00809993142853e-06	1.28082555267511e-05	1.01549231861361e-05	1.21011420215864e-05	0	0	2.12273876301124e-06	8.84953248856816e-06	0	0	1.8192695533641e-07
NA	Salviaflaside	0.00105425588001819	0.000593033460751	0.000973770939158533	0.000695105137800081	0.000992764592237792	2.34873176818525e-05	1.74591784618121e-05	0.000142304531724802	0.000683988168007077	1.786934163129e-05	1.93499548715374e-05	4.16647037278124e-05
NA	1,5-Octadien-3-one	0.000119241974338063	7.12925741751359e-05	0.000116451307149837	8.96296971051631e-05	0.000119906615485683	8.84149593907544e-06	5.50319443792603e-06	2.60203497421662e-05	8.62031203040669e-05	5.9508560456319e-06	8.1738278484605e-06	1.18676738753736e-05
NA	2,6,6-Trimethyl-2-cyclohexene-1,4-dione	0.000179773753278698	0.000109162126041124	0.000177294662685662	0.000137010659799997	0.000173893928184645	2.24096864328154e-05	1.97511558758124e-05	5.0594031133571e-05	0.000131901885625438	2.41227576760009e-05	2.43181109419071e-05	2.83048422175909e-05
NA	Sorbaldehyde	9.63911449398946e-05	5.58567045964917e-05	9.40567269680116e-05	7.27452671784096e-05	9.29527433516892e-05	7.84459323925632e-06	6.11422266290188e-06	2.28107930156945e-05	6.93662648711207e-05	5.84347274634726e-06	8.20323888911842e-06	1.10735785570469e-05
NA	Brassicoside	9.71768486525661e-06	7.98012419853088e-06	1.16962725187996e-05	7.19593711026315e-06	1.0054481960694e-05	0	0	7.16181342852175e-07	6.89429874645566e-06	0	0	0
NA	1-Caffeoyl-5-feruloylquinic acid	2.86815025615071e-05	2.15489884073793e-05	3.29876639221123e-05	2.10782468048016e-05	2.9021360726673e-05	7.5777366337567e-07	3.46742107997454e-06	8.17103702515063e-06	2.43405496352548e-05	5.82606866402045e-06	2.63788816008932e-06	2.67110300241194e-06
NA	PE(15:0/20:2(11Z,14Z))	6.36832831399463e-06	1.71658318304358e-06	6.70664798489389e-06	5.25051210775874e-06	7.45195400458137e-06	1.85788846995226e-06	9.18290147686821e-07	5.13156736766791e-06	1.30459372443255e-06	2.1367799335147e-06	1.36535314825349e-06	1.34561322289143e-06
NA	PE(22:5(4Z,7Z,10Z,13Z,16Z)/dm18:0)	2.67611363850322e-06	1.24640828015713e-06	3.92383898305321e-06	3.55704313657996e-06	5.1285710602548e-06	0	9.50334006318637e-07	0	0	0	9.17865890860539e-07	7.97310652938733e-07
NA	Bilirubin diglucuronide	1.52214112274094e-05	1.52361398621242e-06	9.24526602173704e-06	6.01225476192585e-06	1.2398832645844e-05	0	0	0	2.7848740219841e-06	0	0	0
NA	Ustiloxin B	0.000376152762860401	0.000112274177783131	0.000320636273840527	0.000211077003869773	0.000326569621825361	3.22435747774862e-07	1.41789851109209e-06	1.23058559592231e-05	0.000134511448926682	8.73226451032093e-07	2.672021042301e-07	8.35321758639335e-07
NA	Ramontoside	0.000266394159727697	6.66342777296451e-05	0.000217729606293515	0.000129364256904878	0.000242644339159757	2.05332612217408e-07	2.85150101923268e-06	3.9964472938893e-06	8.26105194462058e-05	2.05633266207401e-06	2.92008604518797e-07	2.82703405727531e-06
NA	1,3-Dipropyl-8-cyclopentylxanthine [DPCPX]	7.98718974633845e-05	5.97267321080274e-05	7.38761043451011e-05	6.38922409585642e-05	0.000111576349447508	1.82938802125939e-05	1.82915840133383e-05	2.35011687175363e-05	5.54491861195574e-05	1.86523252585342e-05	1.89038472740544e-05	2.31349307678286e-05
NA	Gln Val Asn	9.29616098739696e-05	7.45264970293775e-05	0.000109645752526162	7.6248103928916e-05	0.000149380036394272	1.24523210446998e-05	3.05503657513902e-05	3.07704137044168e-05	8.7587345736383e-05	1.70274486456102e-05	1.44738441518101e-05	1.14235651718216e-05
NA	Trifolirhizin	0.000115697510289205	5.96786090692995e-05	0.000150167139763978	9.55602434386027e-05	0.000187985353090952	2.77189881191008e-06	3.34088765328241e-06	1.78207061470256e-05	9.75866835780976e-05	2.27846143645199e-06	2.94989121588585e-06	1.36235545961718e-05
NA	(R)-Laudanidine	0.000286487559230178	0.000125715761802576	0.000224995017531134	0.000210856228464749	0.000420899549046064	2.11460843023292e-05	2.08085554706771e-05	4.83642476357147e-05	0.000119117176752181	2.27918021040984e-05	2.17310713916936e-05	2.56210229887475e-05
NA	Rishitin	5.26087361127946e-05	1.99393218821838e-05	3.63992231095985e-05	4.020931612617e-05	9.59271293881556e-05	2.8440212379531e-06	1.30798496820286e-06	6.20527752725508e-06	2.91206373639248e-05	1.37009820625277e-06	1.74123443259143e-06	2.80351544625248e-06
NA	FMNH2	1.3822956366106e-05	2.74876998979499e-06	1.41158741298001e-05	6.66522024259159e-06	1.85471589702265e-05	0	1.8953720964621e-07	5.08894023222634e-07	4.52544860509124e-06	3.46808654564704e-07	2.7550334907704e-07	9.17553807195752e-08
NA	PYRITHYLDIONE	6.90906509893135e-05	2.1986203658583e-05	6.39763751329079e-05	4.20297773678383e-05	0.00011982766901343	3.18871000396651e-06	4.55988558354288e-06	6.83679418527155e-06	1.82894832277181e-05	4.31025476324088e-06	4.99413679820928e-06	3.09099463268671e-06
NA	Omega-Carboxy-trinor-leukotriene B4	7.58033909396618e-05	5.67611251367099e-05	6.68987874057057e-05	5.45547848160515e-05	5.63180481419547e-05	6.24494930929475e-05	8.83317074936292e-05	8.65664332553675e-05	9.54412918124529e-05	0.000147526780909741	0.000109232925816315	8.92508223399601e-05
NA	Cystophorene	9.01350582426328e-06	4.4945035132473e-06	5.39339756696086e-06	4.84755146680013e-06	4.73260994421713e-06	4.57158799423378e-06	5.46666092858629e-06	6.76454078752787e-06	1.11178732637353e-05	1.52956772434734e-05	1.05482999746714e-05	8.3419296581653e-06
NA	Tetracosahexaenoic acid	0.000213731043092909	0.000165046142573777	0.000183401989900968	0.000168610103711334	0.000159379367504349	0.000154698471403379	0.000193238291807224	0.000193225132662388	0.000225713467567169	0.000318394322657193	0.000234845069770126	0.000232211492262035
NA	3-Oxooctadecanoic acid	9.96527197762701e-05	7.68478885894957e-05	7.89418944507548e-05	6.5205099775442e-05	7.53995883283602e-05	7.30218372098261e-05	8.25813885034055e-05	9.88364589332852e-05	0.000115102788203717	0.000186815981350436	0.000132565861306094	0.000103503562631583
NA	DG(18:4(6Z,9Z,12Z,15Z)/22:2(13Z,16Z)/0:0)	0.000286548118717452	1.06989384326274e-05	1.91728127179022e-05	0.000106611725781386	0.000207241032433704	1.60481104108214e-05	9.7349183604498e-05	0.000269232889687937	0.00028077190391138	0.000440589993149029	0.000337675903058598	0.000241362338933146
NA	(±)-Rollipyrrole	6.40538748190744e-06	1.1630285569869e-06	2.64195719880272e-06	2.16521993632177e-06	2.79921133933176e-06	1.49592524057624e-06	1.20814007541974e-06	1.58349182974329e-05	1.09936800026234e-05	2.10830993248764e-05	1.06088306992744e-05	7.70444353794624e-06
NA	3-keto Fusidic acid	0.000869909947417332	0.000781198008155487	0.000813961323438916	0.00089155780015881	0.000991050547480695	0.000769010672484456	0.000791905141920287	0.00132928474183864	0.00114388790406267	0.00158084470483485	0.00133638894257461	0.00136988322696543
NA	3'-Deaminofusarochromanone	0.000129007367765583	0.000106436028235151	9.364225030884e-05	0.000119197334859798	0.000119273773592025	9.52876515081652e-05	9.38370821228119e-05	0.000154289162044842	0.000150717419275161	0.000199888085784674	0.000153731121093064	0.000145279763124455
NA	SWIETENINE	0.00112740535689989	0.000925945331740467	0.000803101187826185	0.00112551830644579	0.00114900308621982	0.0008574299951002	0.000904091260710648	0.00141470900428277	0.00134770149088008	0.00180374941634016	0.00131907217601089	0.00140859114426971
NA	PE(22:6(4Z,7Z,10Z,13Z,16Z,19Z)/24:1(15Z))	3.58098143223364e-05	7.07315417162826e-05	4.87096694516003e-05	5.31704747701709e-05	4.40548327089505e-05	5.33129361740034e-05	6.61846885796234e-05	9.73023897994007e-05	6.21163889855879e-05	0.000129902559714265	0.000105969454534642	6.49979019139092e-05
NA	N-arachidonoylglycinate	4.84866143431312e-06	5.87724486977586e-06	5.27837810689005e-06	3.90289099711463e-06	2.01990518871537e-06	4.33462836762712e-06	7.90830401737774e-06	1.02711284390286e-05	9.85687455618273e-06	1.23017882522485e-05	8.21921502245616e-06	9.73017249343252e-06
NA	24-Oxo-1alpha,25-dihydroxyvitamin D3	0.00563322002512106	0.00680019615160024	0.0059265042038135	0.00539566084616787	0.00564252252358959	0.00611577358430982	0.00683509475704201	0.00736855631143196	0.00737456378030664	0.00934771530679631	0.00766220717552571	0.00760723898602265
NA	6beta-hydroxybudesonide	1.37919495749052e-05	1.58814542573125e-05	2.03926340514541e-05	1.43411047097191e-05	1.32690845071985e-05	1.08062389123216e-05	1.72148863322547e-05	2.12788302416365e-05	2.60256002751565e-05	2.85954473590035e-05	2.07789572534062e-05	1.6478917485083e-05
NA	Permetin A	1.08806344507762e-06	8.88687809860171e-07	1.76019251121238e-06	1.01635341164324e-06	3.34582456441859e-06	5.38043283148596e-07	2.76889810024298e-06	9.90608485694238e-06	2.27011202466147e-05	2.17342958792564e-05	1.14213360102459e-05	0
NA	Melongoside O	2.88703141514821e-06	1.33047655697517e-06	3.07997062670546e-06	1.80360182017325e-06	2.68822581672191e-06	1.44278422192959e-06	3.37934566747709e-06	3.26088871288975e-06	4.18133554812681e-06	6.57422552541767e-06	3.14348888086015e-06	2.48113420115545e-06
NA	Isovalerylglutamic acid	2.03288102216096e-05	1.77626953626292e-05	2.5607171467383e-05	1.50831721446601e-05	1.72535810088484e-05	8.31919499750707e-06	3.6666681758369e-05	3.35311177847392e-05	2.53988822599635e-05	4.73858259215339e-05	3.1145888413144e-05	1.32588457165065e-05
NA	alpha-Micropteroxanthin B	0.000364811882437993	0.000359595157956941	0.000351243318524951	0.000326871486159312	0.000368100283686745	0.000311723578216857	0.00045558082275077	0.000453446053916211	0.000444978046984619	0.000619918454619391	0.000438848304314384	0.000326987530007893
NA	2-Methyl-3-(2-pentenyl)-2-cyclopenten-1-one	3.45079780121485e-05	3.8198469205698e-05	3.77794381751597e-05	3.62583770274909e-05	3.63811072416151e-05	3.25636457174487e-05	3.851614028093e-05	3.85132611496119e-05	4.01323976587732e-05	3.83516385775183e-05	3.8820388195475e-05	3.64893783176681e-05
NA	4-(2,6,6-Trimethylcyclohexa-1,3-dienyl)but-3-en-2-one	0.000226263214335516	0.000231908072866112	0.000260739605242808	0.000231656214243772	0.000223869503777332	0.000223623936807514	0.000252942355857194	0.000251825519588848	0.000282781261171758	0.000250450233844394	0.000249974214468431	0.0002388889438579
NA	Ganglioside GA2 (d18:1/16:0)	7.99604501454314e-05	9.96551733646186e-05	0.000155476740368967	8.16356293165536e-05	0.000117592607182848	0.000124430243566759	0.000199457001047959	0.000145031723297999	0.000139928231633722	0.00011260425675157	0.000141539632725705	0.000144527328613111
NA	N-Despropyl-rotigotine	1.01179920859605e-06	1.07369833522837e-06	9.72647091982189e-07	1.19858386841974e-06	1.13302883446215e-06	1.52436126276636e-06	1.83344726643403e-05	1.13950472584905e-05	7.48235544717182e-06	1.16409051919916e-05	6.1038881716978e-06	1.48854435387125e-06
NA	Ginsenoyne N	0.003703951013433	0.0043546032465507	0.00423234147582069	0.00403273216633599	0.00455336917297641	0.00378564900452259	0.00540457427028605	0.00485232555865995	0.00484703067662243	0.00484202130750251	0.00439865903996059	0.00442753570163052
NA	Matsutakic acid A	0.000201940087940583	0.000235405101099329	0.000233134208608594	0.000216823628662381	0.000242659901320921	0.000206720193916594	0.00027238371885424	0.000265439672753517	0.000272070812398608	0.000285105912362693	0.000245726830162415	0.000231674805601176
NA	RHOIFOLIN	9.23534477713109e-06	2.0370241796344e-06	1.82688113090293e-05	1.09351704987591e-05	3.78775372116092e-06	3.57014084103671e-05	1.71236608976507e-05	4.17430306845687e-05	3.84908284112322e-05	8.49582130333884e-05	6.2976908725647e-05	7.69590820373692e-05
NA	6,7-dihydro-12-epi-LTB4	5.18263345575681e-05	5.56622102735305e-05	6.61860494865881e-05	5.74295970930128e-05	5.23114122661673e-05	6.13334743385158e-05	4.62680251228542e-05	8.13568125371573e-05	9.04131185582185e-05	9.84123655554039e-05	8.71764070639232e-05	8.37076014029753e-05
NA	Nb-p-Coumaroyltryptamine	1.1034877348056e-05	8.78672976298007e-06	1.37123984691986e-05	1.01415950170239e-05	1.12427478181628e-05	2.50639890330059e-05	6.7879092587032e-06	2.23259017457921e-05	2.78406424707356e-05	2.72989025993846e-05	3.21154285119862e-05	2.73293814279885e-05
NA	(3b,6a,12b,17a,20S)-Dammar-24-ene-3,6,12,17,20-pentol 20-[glucosyl-(1->2)-[rhamnosyl-(1->6)]-glucoside] 6-xyloside	9.57506131970197e-06	7.98635256699231e-06	6.17683724826478e-06	7.8984520057108e-06	7.35298566895993e-06	1.16113123400317e-05	7.86520135364678e-06	1.24238178014197e-05	1.50682523960723e-05	1.62495361449432e-05	1.47308210407475e-05	1.38339070780034e-05
NA	N5-Acetyl-N2-gamma-L-glutamyl-L-ornithine	3.27381035799066e-05	2.45607539677717e-05	3.57418213349484e-05	3.92927062334747e-05	2.87823582460224e-05	3.27700821866356e-05	3.3445086941365e-05	3.85696711271216e-05	4.81189069811282e-05	4.82122720394676e-05	4.09024054913717e-05	4.33176542479318e-05
NA	Thyrotropin releasing hormone	4.48969499002613e-06	2.45501564951924e-06	5.04701545359071e-06	3.50657546396496e-06	3.53186567160188e-06	5.12188724210015e-06	4.55349934694708e-06	5.64773775873412e-06	5.94951286616722e-06	5.72494201785312e-06	5.48319817318222e-06	5.61722742569338e-06
NA	Pectenotoxin 3	2.18155619504515e-05	1.25738260038678e-05	1.79916144750811e-05	1.50300876139465e-05	1.33596983046455e-05	1.45715430456606e-05	2.35501092400871e-05	2.69186108559527e-05	3.14564743524474e-05	1.9475174880179e-05	2.44957197869696e-05	3.5921053755078e-05
NA	Thr Asn Thr Asn	0.000260805404975882	0.00020961996475486	0.000255449165180804	0.000233774257675022	0.000216097617504226	0.000184437181435312	0.000265373558087726	0.000281453948663418	0.000229051504061019	0.000271818036148036	0.000260038800660341	0.000307218494405299
NA	Avocadene 1-acetate	2.6293813054112e-05	1.83153903418727e-05	2.23190875477985e-05	2.19862742659369e-05	1.54324823277126e-05	1.78498786555006e-05	2.46724068803385e-05	2.49916228113165e-05	2.19012754888708e-05	2.51285978256046e-05	2.55559780826444e-05	2.77120968425034e-05
NA	IV2Fuc-nLc4Cer	9.95166805328634e-06	6.01434273972654e-06	9.11945774897101e-06	1.03479965469292e-05	8.81833752087605e-06	4.23148129084309e-06	9.46399646787797e-06	1.60331745476873e-05	1.25629335967814e-05	1.44900264312689e-05	1.89726938402228e-05	1.36372213968164e-05
NA	Albigenic acid	2.96926505206843e-05	3.75527428666188e-05	3.84090468112887e-05	3.22957082162594e-05	4.19735032777377e-05	2.19137536897679e-05	3.54110472094531e-05	4.73116385046316e-05	6.57971778770263e-05	6.11479702723905e-05	5.67899374111139e-05	6.00754296054173e-05
NA	Isomasticadienonalic acid	0.000261987855786794	0.000259169148353744	0.000311564398622452	0.000284025523660952	0.000344122137731848	0.000284996955134949	0.000350342831665443	0.000396844013026753	0.000420750311279888	0.000400894763734309	0.000388889466742849	0.000404107008488973
NA	Choline	0.000138778474589391	5.32014466010217e-05	6.82317648693005e-05	5.45711169400529e-05	6.6613822984998e-05	4.68878999231789e-05	7.3165985784274e-05	0.000102767951404759	0.000219023871879198	0.000142133806240331	0.000228914691663387	0.000305516516127399
NA	DG(20:3(5Z,8Z,11Z)/22:6(4Z,7Z,10Z,13Z,16Z,19Z)/0:0)	0.000646535397121394	0.000418345758336657	0.000521113807433651	0.000390644369507376	0.000371854884686684	0.000470635162790533	0.000459049920378506	0.000505268756219604	0.000963338498961197	0.000986370561627485	0.00116705103356387	0.00112196069131797
NA	3-(Acetyloxy)-2-hydroxypropyl octadecanoate	8.62690083313899e-05	9.23350286377286e-05	9.23945627305991e-05	8.55313491336415e-05	8.34568719483747e-05	7.52077992612186e-05	8.81521630564025e-05	0.000101094981640989	9.92771469784058e-05	9.38895574334716e-05	0.000103255978579377	0.000125463319465811
NA	Pro Ile Leu Ile	0.00556911675691724	0.00801961672800048	0.00633282176521621	0.00659965807494753	0.00699427692401941	0.00675468431022208	0.00624102113313941	0.00874545618890723	0.00730632563897749	0.00891936001060466	0.0100286944609159	0.0119955564809833
NA	Quinquenoside III	4.97797653238683e-06	3.6449387498287e-06	4.41150192560898e-06	5.72121314580859e-06	2.62968983836385e-06	5.63090614321353e-06	5.45775415226494e-06	8.55070703871328e-06	7.24801579382881e-06	6.67223761888877e-06	5.65853649207721e-06	5.15841637454096e-06
NA	Norchelerythrine	1.24616294460533e-05	1.78111673324469e-05	1.08011694625764e-05	1.46620134766884e-05	2.67274942059776e-06	2.69469706878023e-05	3.25493897258705e-05	8.16324112558009e-05	2.18809219421123e-05	2.60189936031034e-05	2.85088338395626e-05	3.74389114702975e-05
NA	CDP-DG(16:0/22:6(4Z,7Z,10Z,13Z,16Z,19Z))	1.64429695740997e-05	1.85296126499188e-05	1.82066138681808e-05	1.61972083420225e-05	5.45212184994042e-06	1.84277692530972e-05	1.94512799102411e-05	2.34547744232487e-05	2.73351384257198e-05	2.12539845509043e-05	2.67550951379954e-05	1.70754116550424e-05
NA	Lettucenin A	0.00020274511850803	0.00021206175454169	0.000115657337407928	0.000150834257136382	8.99753318480094e-05	0.000194040976161546	0.000257801848493885	0.000223440614646888	0.000238965176817526	0.000200881166944013	0.000226628374829862	0.000203841299739229
NA	2-Methyl-1-methylthio-2-butene	2.31940270672947e-06	7.01353572411076e-06	2.81812203614476e-06	6.37512888430624e-06	2.10566181780601e-06	2.64541593276773e-06	6.13637922698417e-06	7.03885312964125e-06	9.81371104127437e-06	5.42534175502752e-06	6.05845625924512e-06	5.09400111598504e-06
NA	1-Hydroxy-1-phenyl-3-octadecanone	0.000125492732283598	0.000166621446886194	9.80306290752893e-05	0.000155859884786584	0.000105164732454102	0.000121108135287998	0.000151906027425918	0.00015254499069377	0.000155001770446212	0.000183840474654909	0.000201857729324394	0.000147274719374718
NA	4-Methyl-2-pentyl-1,3-dioxolane	0.000492369989726271	0.000615208377537651	0.000367570032899753	0.000605351347258427	0.000367409891145014	0.000527167251586901	0.00063395215042419	0.000575665738729368	0.000634031674178458	0.0006787652795462	0.000754160362633074	0.000521891276911758
NA	Neolinustatin	8.65184137415296e-06	7.88622271234797e-06	9.85186204859414e-06	8.04562355504655e-06	5.96503890331222e-06	6.88259674573533e-06	1.27405048068724e-05	9.8469071217803e-06	8.4786020981128e-06	1.11270187582944e-05	9.08477593083803e-06	1.46742998177055e-05
NA	Catechin 3',5-diglucoside	4.50392061465578e-06	1.1675506468171e-05	1.1101901745821e-05	8.87924902355009e-06	3.36663435082313e-06	1.02972308996771e-05	2.22236098715327e-05	1.75038428368262e-05	9.09706219838129e-06	2.19901734759324e-05	6.98394512962993e-06	1.85099037683498e-05
NA	Myristic acid	1.29513039772099e-05	1.76437909442251e-05	1.32664465124293e-05	1.52016725454366e-05	1.4310497691325e-05	1.79509990813566e-05	1.77701415678675e-05	1.77189415746886e-05	1.59444122389141e-05	2.02035645639391e-05	1.96319659838073e-05	1.93326342918752e-05
NA	1-Acetoxy-2-hydroxy-16-heptadecen-4-one	0.000151575413079437	0.000255722475878777	0.000185180540263676	0.000214015643375558	0.000207613115783886	0.000240533712572556	0.000268864722093845	0.000267203344635357	0.000184649679281645	0.000280175496118886	0.000278484596259226	0.000313248453386198
NA	8Z,11Z,14Z-heptadecatrienoic acid	6.08211266368244e-05	9.97165066872565e-05	6.48127336591441e-05	8.84420071811391e-05	0.000109180432297386	0.000119142848218602	0.000119033449686916	0.000125166949184939	9.18186445404411e-05	0.000136803277041327	0.000133553408260513	0.000150647820531752
NA	1(10),11-Eremophiladiene-2,9-dione	5.46529717413635e-06	5.80958631703303e-06	5.38725000230506e-06	5.36196926011316e-06	4.24099807436897e-06	5.88934074340801e-06	5.73398984873798e-06	6.20198315186751e-06	5.95688276336644e-06	5.39266050009931e-06	6.90302407684911e-06	6.8049647913759e-06
NA	Araliasaponin III	3.15883599279883e-05	4.04423943027185e-05	3.63332145908761e-05	4.86669122471633e-05	2.49349552505218e-05	4.73268578129351e-05	4.95540982352512e-05	4.55691760025956e-05	4.9075064340246e-05	4.15491509500115e-05	5.44700190339456e-05	4.9763153662264e-05
NA	Capsianoside II	2.65858342634618e-05	3.27219931280479e-05	2.98400084409965e-05	3.97255469237579e-05	2.51709961583501e-05	3.67868619204118e-05	3.58159957218388e-05	3.69918935214519e-05	4.20850143521857e-05	3.58800184221811e-05	4.66174089580093e-05	4.83479952436867e-05
NA	Jasmolone	1.98181849127965e-05	2.84540769012029e-05	2.10681297640056e-05	2.46588841458642e-05	2.11505586656537e-05	3.07522727359741e-05	2.75778735503238e-05	3.12814534739904e-05	2.77020699590005e-05	2.6480720513762e-05	3.01887878699911e-05	3.7727886926487e-05
NA	2-Butyl-3-phenyl-2-propen-1-al	4.18706050138836e-06	6.14079959949648e-06	3.9998945085757e-06	4.3388882713076e-06	3.96649900950669e-06	6.32515563302387e-06	5.86413475857289e-06	7.19721488191482e-06	6.05132604814639e-06	5.56199549939458e-06	6.47614868526963e-06	8.87040069612297e-06
NA	5-Aminopentanal	1.28158077133298e-05	1.80480378755745e-05	1.51010737266287e-05	1.4635777320698e-05	1.14918674895642e-05	1.75181696797191e-05	1.56852530727645e-05	1.80747672969931e-05	1.58653021741188e-05	1.93788425786964e-05	1.94310263635561e-05	2.53674031350223e-05
NA	Stearidonic acid	1.23713590292549e-05	1.55587587260224e-05	1.52586066896035e-05	1.32086357406202e-05	1.13773937606671e-05	1.40714402639578e-05	1.41676100222133e-05	1.63811009868414e-05	1.60212715065971e-05	1.55471697304735e-05	1.67875201867441e-05	1.87447260724773e-05
