# Supplementary material for: Multi-omics analyses reveal that the gut microbiome and its metabolites promote milk fat synthesis in Zhongdian yak cows
Source: PeerJ journal article supplement (doi:10.7717/peerj.14444), 2022-12-02
Supplement: biomarker_Web_Report_.zip [file H_vs_L_metabolites_classification.xls]

classification	Number	IDs
Fatty Acyls	4	pos_1180;pos_2142;pos_659;pos_663
Organonitrogen compounds	4	pos_1;pos_1662;pos_39;pos_866
Glycerolipids	3	pos_1857;pos_2560;pos_840
Glycerophospholipids	3	pos_1143;pos_1270;pos_2158
Carboxylic acids and derivatives	2	pos_1720;pos_1927
Flavin nucleotides	1	pos_1370
Lignan glycosides	1	pos_2568
Organooxygen compounds	1	pos_529
Peptidomimetics	1	pos_963
Phenols	1	pos_2850
Sphingolipids	1	pos_1248
Tetrapyrroles and derivatives	1	pos_2218
