# Supplementary material for: Multi-omics analyses reveal that the gut microbiome and its metabolites promote milk fat synthesis in Zhongdian yak cows
Source: PeerJ journal article supplement (doi:10.7717/peerj.14444), 2022-12-02
Supplement: biomarker_Web_Report_.zip [file H_vs_L_pca_loadings.xls]

#ID	PC1	PC2	PC3
pos_1	0.000133507051840765	-0.00287313526387692	0.00271532217050327
pos_10	-0.794244947158474	0.0460827351937348	-0.231823718392242
pos_100	-0.00113044135043707	-0.00136980527849633	-0.00102043996721686
pos_1000	0.00403215486115401	0.0121372649628511	0.00055566104681434
pos_1001	0.000216796136728831	0.00122048307770303	-0.00186425965864743
pos_1002	-5.52518800661129e-05	-0.00011282864016085	-2.16804870939459e-06
pos_1003	0.000814376626167284	0.00167623558097453	6.58730937739881e-05
pos_1004	0.000220972395850798	0.00174034888220394	0.00509191022047967
pos_1005	0.000371941886305983	0.00054128481566292	0.000386333330761395
pos_1006	1.99981855055467e-05	-0.000147166400269908	0.00020505930122821
pos_1007	0.000400717778784286	8.12629058859194e-05	0.000659191088423508
pos_1008	0.000674973962713026	0.00357831618124748	-0.000145856019231667
pos_1009	0.000480248205307611	0.00179671856839456	-0.000232002160261762
pos_101	0.00028146387605353	-0.00159101410799268	0.00119524926450621
pos_1011	-1.58945577950893e-05	-8.2194284768378e-05	4.44907324631394e-05
pos_1012	-0.000354318553977343	0.000146289973682257	-0.00110555560956736
pos_1013	-0.00223606025916328	-0.00362353720260112	0.0031758783763556
pos_1014	1.23096997308255e-05	8.40723640094354e-05	2.58367837868952e-05
pos_1015	-0.000163841344891219	-0.000163652553679245	0.00150089533477879
pos_1016	-1.41668367404153e-05	1.7979823540869e-05	7.90368353147152e-05
pos_1017	0.00023149077555594	0.00310395565880024	0.002182744939579
pos_1018	0.000253857746247215	0.000967709032520945	-0.000221784579941846
pos_1019	0.000276102662954952	-0.00158310785550224	0.0010656295311733
pos_102	-0.000965455857760578	-0.0017146999537328	-0.00225353763005099
pos_1020	-8.18637384798299e-05	0.00016433366725174	0.000964033417768942
pos_1021	5.90708264640419e-05	-7.83294274179206e-05	-0.00024133828233096
pos_1022	3.66749416709077e-05	-4.5866107382759e-05	4.38084451929032e-05
pos_1023	0.00486761056482415	-0.0460760083293655	0.0543853026816577
pos_1024	-9.84493548134768e-05	0.000332080971760766	-0.00301725040820072
pos_1025	0.000224004725953214	-0.000295156963190937	9.05503487617925e-05
pos_1026	9.05757172539353e-05	0.000104357598030277	0.000379967320886292
pos_1027	-4.70302803877277e-05	-4.67539591399657e-05	3.73694420087363e-05
pos_1028	0.00139835654128336	-0.00379097559801548	0.000578874420693736
pos_1029	0.00630969539961753	0.0211842838740105	-0.00018481869965047
pos_103	0.00473767379368603	-0.00806087143236719	0.00022252354735093
pos_1030	8.88747942293512e-07	-0.000273513459593717	-0.000102620037369363
pos_1032	0.00437097568624847	-0.015269768843892	0.0358593831955585
pos_1033	-1.85559209210501e-05	-0.000110389618392935	0.000259384703452911
pos_1034	0.00402954990699948	-0.0142588042339856	-0.00560064813795072
pos_1035	5.9250591593574e-05	0.00043493096010488	-2.91963093427926e-05
pos_1036	0.000186019795757776	0.000238993098004075	0.000406235501147354
pos_1037	0.00062984356103513	9.48262126632991e-05	0.000789351345147744
pos_1038	0.00110342533984522	0.00502569710070401	-0.000810009948495152
pos_104	0.000389627806681713	-0.000503122918272027	0.00110405125517781
pos_1040	1.04796467549752e-05	-0.000154798707838975	-4.39907011817817e-05
pos_1041	-0.000211245967152024	-0.000943936355401949	-0.00264526648067392
pos_1042	1.85408111075411e-05	-0.000274379850572443	-0.000324665134775523
pos_1043	-9.44547028221654e-06	-0.000123434066881785	-1.3368924270516e-05
pos_1044	-2.91739555236826e-05	-0.000118338981467322	0.000104502185697312
pos_1045	0.000559232489264962	0.00183686759622587	0.000415186756874738
pos_1046	0.000430834048132256	0.0021163551962336	-0.000534814462000615
pos_1047	0.000351437075637731	-0.000221331245050077	-0.00120161745056189
pos_1048	3.9552788666411e-06	-2.57874515301056e-06	-1.31962627591966e-05
pos_1049	-0.000167519561102146	-0.00015796370485405	-0.000909588190369033
pos_1050	-1.99156965672201e-06	-0.000197626022265901	-0.000677641684868025
pos_1051	2.51499865756916e-05	0.000129575030700898	-1.39906980246439e-05
pos_1053	-0.000133503827777053	0.00189724955675699	-0.00709174765619191
pos_1054	-0.000175587211549629	-0.000132748583795218	0.00163838912482892
pos_1055	0.000841354143318503	-0.00109819439396948	0.00292525398341431
pos_1056	-1.23973663907525e-05	-3.70421073766141e-05	4.33918572320221e-05
pos_1057	0.000126157555769216	0.0007871435563481	-0.000172348155726327
pos_1058	-0.000351467962812878	-0.000415110502042803	-0.00149061376970857
pos_1059	1.74393276253753e-05	-6.74426906097726e-05	0.000111825810413409
pos_106	-0.00158257477856865	-0.000613919168378893	-0.000932402369491645
pos_1060	-0.000171800192389583	0.000379193467514568	8.24255381408327e-05
pos_1061	7.29662724007589e-05	-0.000136279368139597	0.000193059693430333
pos_1062	0.000260393439580543	-0.000787920131793804	0.00107741176279628
pos_1064	2.94158569304377e-06	-0.000227403418616069	-0.000217024805436658
pos_1065	0.00181887631403079	-0.00347216789560899	-0.00425045150234251
pos_1066	0.0045704171237504	0.000108890626119627	0.00255492302524067
pos_1067	0.000775459712329435	0.00216999971465406	0.000572879958664231
pos_1068	0.00069828418441676	-0.00432288094158456	-0.0030118598293047
pos_1069	-0.000157637937385827	0.000127792706699664	-0.000982352259226261
pos_107	0.00198127348891731	-0.00171716327301388	-0.00223057322340904
pos_1070	-0.00015536857669037	-0.000103723500796894	-7.55501789760337e-05
pos_1071	-8.29114484900303e-06	-0.000329696254579706	-0.000322728405886843
pos_1072	0.00019334672428537	0.000251629158164937	-6.40780195204678e-05
pos_1073	-5.40138875019761e-06	-8.38298480840414e-05	-9.00624220418632e-05
pos_1074	-0.000253950285568655	-6.75643942881613e-05	-0.00227814272122163
pos_1075	1.10518910463362e-05	-9.51241996204976e-05	-4.56786530861593e-05
pos_1077	0.0483942781928377	-0.108870065783613	-0.0195972513679942
pos_1078	0.00227956786989198	0.00747808030154484	0.000433694669280063
pos_1079	-5.73508385754557e-05	-0.000329638329575888	-0.000160685798369018
pos_108	0.000227590322301211	-0.000641905496204346	-0.00211313771939898
pos_1080	1.56106155862781e-05	0.00262544391146788	0.00228137138490801
pos_1081	-7.01531101867199e-05	-3.05964386577503e-05	-4.07866186443981e-05
pos_1082	3.12678169548542e-05	5.63456527566548e-05	8.89453947090484e-06
pos_1083	-0.00750135741039172	-0.034415634105409	-0.0230631443706161
pos_1084	-4.98027118489107e-05	-0.000163748703187852	-0.000157288419845462
pos_1085	1.10890315180249e-05	-0.000252233375386448	0.000148601431738831
pos_1086	-4.03360800593351e-05	-7.43980694612911e-05	-8.65961154630273e-06
pos_1087	-3.53421772803995e-05	-0.000919470880778579	0.00146954315062641
pos_1088	1.39507241422541e-05	-3.6284841013794e-05	-0.000131492318064574
pos_1089	0.000131760332123709	5.72106421195129e-05	1.90345685825923e-05
pos_109	-0.0011799572445999	-3.83529534085623e-05	-0.000383384258289025
pos_1090	0.000201174403050032	2.35219491255865e-05	0.000113774286177126
pos_1091	5.09626238738522e-05	-0.000260269157402194	0.000130223961744229
pos_1092	8.61757657924513e-05	-2.48955799583413e-05	-0.00026279638108495
pos_1093	9.42827701897237e-06	5.1982391725852e-05	-2.08792147472303e-05
pos_1094	-0.000109965285036446	-0.000736936376833695	0.000500994225532517
pos_1096	3.61342283896615e-05	-2.04002995306235e-05	0.000102732571514514
pos_1097	0.000219771280200359	-0.000683602468064098	0.000658657305561762
pos_1098	2.83241570289253e-05	-9.55485727639549e-05	4.37875281384864e-05
pos_1099	-0.000200378855838168	0.00216081946991676	0.00104258839472055
pos_110	3.34801324079384e-06	-0.000522026428127059	0.000385318090363011
pos_1100	-0.00361967181417819	0.0016362631032669	-0.000838913097316824
pos_1101	0.00084797448251859	0.00242410742999596	0.00553738579866832
pos_1102	2.63027202941978e-05	-0.000142052026291231	0.000184657165081476
pos_1103	0.000158039421747025	-0.0017564145924272	0.000854856591171235
pos_1104	0.000108518155375057	-0.000182262019660876	0.000364191914113681
pos_1105	0.0386244320101587	0.132782305144586	0.00496276460010561
pos_1106	-1.8309026634065e-05	6.86243475249433e-05	-6.01929430687438e-05
pos_1107	0.00142631256012625	0.00356563833613311	0.000183925507446633
pos_1108	-0.000650479975257001	-0.00112709082065693	-0.00273648347560506
pos_1109	0.00186857373384647	0.00920820568475974	-0.00145126883975437
pos_111	0.0105545819471267	-0.0110222019436193	-0.0174289340322228
pos_1110	0.00916427092618873	0.0383159613380163	-0.010818840088827
pos_1111	0.00386364728547482	-0.00522378439419962	-0.0308969665799634
pos_1112	0.000652458844666989	-0.00226525752390923	0.00377714744401407
pos_1113	-0.000203719469695703	2.78678705179371e-05	0.000141504785012648
pos_1114	9.54729036510965e-05	-0.000398552268134937	0.000488416573976074
pos_1115	0.0192904433156865	-0.020956388544215	0.104948263796291
pos_1116	0.00103615560281406	0.00311942084594078	-0.000370185432798447
pos_1117	9.04458014136281e-05	-0.000502076161306101	0.000288133975711374
pos_1118	1.16459586060769e-05	-0.00049140094319161	4.65578258639733e-05
pos_1119	8.77107611377848e-05	-0.000253701677844859	0.000229068544013165
pos_112	-0.000467022998623705	-0.00180501490546585	0.000685058894642664
pos_1120	5.18830504655443e-05	-0.000489243338210125	0.00031132372701908
pos_1122	0.000111061785682307	-0.000158636504905928	0.000200381869315597
pos_1123	2.20531971548912e-05	0.000113781825007508	7.6169320535638e-06
pos_1124	-0.00134329017250004	-0.00191364909797828	-0.00865310290991164
pos_1125	0.00782224508799942	-0.00085801636339987	0.0352582466034506
pos_1127	0.000800714880322886	-0.00543022962727441	-0.00629058825831565
pos_1128	1.53571776081154e-05	-9.37800275204191e-05	-0.000111943623388759
pos_1129	5.55587613461667e-05	-0.00014618170222683	-3.13063144554903e-05
pos_113	0.000372012218103688	-0.000553080591797049	0.000691718479495458
pos_1130	0.000117561787116876	8.8202672080969e-05	8.73841608188368e-05
pos_1131	0.000187256235079826	0.00103665722496538	-0.00100216474578687
pos_1132	0.000243546105456407	0.000560662734127017	0.000101203067816404
pos_1133	2.82444418110405e-05	1.42180853235319e-05	0.000467735429003996
pos_1135	0.000282552465775809	0.000511490925646518	0.000286576556195071
pos_1136	0.00125741140302341	-0.00126421945851548	-0.000329403511004821
pos_1137	0.000347803967748811	0.00256114916499227	-0.000463145347635095
pos_1138	0.000111958703338542	0.000732058333460646	-0.000140615864741238
pos_1139	0.000325115806112252	-0.000989813386018697	-0.00269726270901915
pos_114	8.82164806283539e-05	0.000499186472036603	-0.000764679109729847
pos_1140	0.000342109452100421	-0.000183650225412172	-0.000565100583635917
pos_1141	0.000118867483464233	-0.00037124140719043	-0.000781165894750508
pos_1142	-0.000397031668657697	3.63051754451015e-05	0.000541403932327856
pos_1143	4.74007872670483e-05	8.17456213276815e-05	8.9389490626501e-05
pos_1145	-0.00130364028299391	-0.00117463815262885	-0.000365716184355503
pos_1146	-8.15254836061507e-05	-0.00165534870727235	0.0010843446777939
pos_1147	-0.000208246003525242	0.00012644995913022	0.000499614686536643
pos_1148	0.000714139496548601	0.00350651703298715	-0.000882607239441574
pos_1149	0.000225845795140587	0.000105763163661003	0.000176299582225345
pos_115	0.00531339869498228	-0.0129143956838988	-0.0103411637693299
pos_1150	7.98203842719712e-05	-0.00046586233903657	-0.00329786124108965
pos_1151	-7.34651157778803e-05	-6.09969414622629e-05	6.74003172302481e-05
pos_1153	0.000203566587996548	0.000463520692929257	0.000106273703230047
pos_1155	0.000292385844147405	-0.00106877431858097	-0.000455773386363222
pos_1156	-2.72072145901673e-05	-2.16828835780126e-06	-3.79564796039846e-05
pos_1157	0.000664666752068925	-0.0040813785677755	0.0024129204990408
pos_1158	-0.000688165769496946	0.00184972293102098	0.0113172382897322
pos_1159	-6.18642597237902e-05	0.00992553941590448	0.040018222089048
pos_116	0.000218762401256292	-0.000144616108497823	-9.66675041082478e-06
pos_1160	0.0038905416624895	-0.000386097378746795	0.00607686295351028
pos_1161	0.00159399440271056	0.00543594942819438	-0.000364556922632682
pos_1162	2.83146652715054e-05	-0.000945007402841938	-0.000752000174338059
pos_1163	-0.000197465563384601	-0.000210494494244547	-3.84831812974361e-05
pos_1164	-1.00986748207378e-05	-2.4799712357395e-05	-0.000147139346707653
pos_1165	-1.81588882677909e-05	-0.00010565755376557	3.99881088391098e-05
pos_1166	-0.000177867479502683	-0.000164760355032783	0.000135897117310906
pos_1167	0.000166516908363274	-0.000560251802919291	0.000352929923748723
pos_1168	0.00305586587027956	0.00161822636320609	0.00916746782340886
pos_1169	-0.000826821150317868	0.000253913761205152	0.00184037034411177
pos_117	0.000568490600825461	-0.00419829875092226	0.00129240689799694
pos_1170	-0.000224771971587642	-0.00215455630883886	-0.00173955318461196
pos_1171	-1.56034793937087e-05	-3.97983859537803e-05	-8.98304741354422e-05
pos_1173	-1.58954205345675e-06	9.0957665758036e-06	1.11815799387865e-05
pos_1174	0.000252045047896567	9.69649424498322e-05	0.000559896985217582
pos_1176	-1.19616199939257e-05	-6.57984151358496e-05	-0.000148963035445013
pos_1177	2.18092837313036e-05	-0.000500895768384942	0.000735774386913248
pos_1178	2.80308500017701e-05	-0.000103203241077826	6.61433628477984e-05
pos_1179	0.000179678118804801	-0.000900171608209105	0.000986982011556132
pos_118	-0.000504917432461417	-0.00408806341163855	0.00022341857335831
pos_1180	0.00170000787981268	0.00379243904894481	0.00788215115761409
pos_1181	3.44402845674255e-06	-5.67292115400064e-05	7.1683489423513e-05
pos_1182	0.000110475700241576	-1.42839992398077e-05	0.000473837086262468
pos_1184	-1.66898750196382e-05	-0.000128142297091738	7.15355108136481e-05
pos_1185	6.29089537606076e-05	-0.000148380551827309	0.000156649038119886
pos_1186	-1.38076892350542e-05	-2.67686863129832e-05	0.000126339401339865
pos_1187	5.01834418023275e-05	-0.00134026348644449	-0.000350776941716479
pos_1188	9.25660800790552e-05	2.14138095344775e-05	2.62229168481948e-05
pos_1189	0.000269803695177277	-0.000405173996648112	0.000265871502579344
pos_119	0.000122492673535491	-0.00124362145019164	0.000531023445212609
pos_1190	-0.000438798378314418	-0.000878612409941877	0.000371966785861942
pos_1191	-0.000137646346940783	-0.000344054227681562	9.93332787009553e-05
pos_1192	-6.45859541525263e-05	-6.81137444059289e-05	-9.25011921098408e-05
pos_1193	3.19533715683265e-06	0.000278603221479049	-0.000244604841861791
pos_1194	0.000399720719661811	0.0019310223699531	-0.000360054289541424
pos_1195	0.000305892170725861	-0.000261987760676802	0.00117288740728759
pos_1196	0.0149018703653066	0.0668329508244646	-0.0193062609377391
pos_1197	0.0156902495820421	0.0075950178094137	0.0288022101308579
pos_1198	-0.00272232187082275	0.0035766199257619	0.0222411352581013
pos_1199	8.10950900163907e-05	0.000297623711740405	0.000130500213042287
pos_12	0.000378455802299697	-0.00158433639382628	0.00234815643641326
pos_120	0.00329483406991714	0.00770483083845969	0.00502777199107731
pos_1200	0.000811948619146472	-0.000598537255498248	0.000223454034065619
pos_1201	0.00015538157234874	0.000609649499169725	-0.000214096631799247
pos_1202	1.59982292746025e-05	-0.000399404203660907	0.000145107956494941
pos_1203	1.34344541023277e-05	-7.01508641026109e-05	0.000228926799640872
pos_1204	2.06259766753604e-05	-3.40699754540211e-05	3.54631720747562e-05
pos_1206	-3.67069305215807e-06	-0.000171448948154035	7.56659518341248e-05
pos_1207	0.157007127133097	0.566155889937508	0.00680961791194154
pos_1208	3.61422845384655e-05	0.000123042919550599	-4.5920767582714e-05
pos_1209	-1.53588557609792e-05	-0.000106515452824217	7.29026727907513e-05
pos_1210	-0.00785447728711094	-0.294590358955953	0.384716754268765
pos_1211	-0.000390678508968352	7.71261372811048e-05	0.00312043567496375
pos_1212	0.00293580345681831	-0.000720419234599852	-0.00277282352829037
pos_1213	0.000343622404540363	0.00155636743675317	-0.000299314194850498
pos_1214	0.00104792781375824	-0.0010734478785234	-0.000432944468441561
pos_1215	-1.87789027240727e-07	-0.000782704585575449	0.000528519006790557
pos_1216	-5.1645470897116e-05	-4.14116376806699e-05	0.000450353195412792
pos_1217	1.99504753899258e-05	-8.65450200068834e-05	8.05386244808965e-05
pos_1218	-0.0127018521478348	-0.0144310967799727	-0.0542204352995327
pos_1219	5.04735662309045e-05	-0.000138666630354642	4.18409469993425e-05
pos_122	0.0130150076923886	-0.027262334970028	-0.0462187894610168
pos_1220	0.000231510422054147	0.000416687698287529	0.000179971350331811
pos_1221	-0.000175797225760154	-0.000192028510848741	0.000273204300395643
pos_1224	-0.000669181449957821	-0.00144166258626227	0.000604793581279628
pos_1225	0.000203064181032526	6.06720387373101e-05	0.000346124772601287
pos_1226	0.00087434994138863	0.00399467545709205	-0.000610287752523887
pos_1227	4.36441972337863e-05	0.000245685667773526	-3.72429619550055e-05
pos_1229	0.00014713993908098	0.000137755100315675	-0.000407959402981084
pos_123	-0.000433125315291912	0.000728851281233298	-0.000414905303037541
pos_1230	-0.00422986915558041	-0.00038880008306934	-0.00691908427314642
pos_1231	-0.00046645010020957	-0.00426596109585705	0.00240081638038597
pos_1232	0.000323307771049383	0.000713652668703522	0.0042059312301343
pos_1233	1.80303630688786e-05	-0.000111203329962387	2.76614345092702e-05
pos_1234	0.000323507536535061	5.47922551985824e-05	-0.00107203587306468
pos_1235	0.000267194889125259	-0.000174244150832462	0.000186723653170684
pos_1236	-2.42989345051782e-06	-9.95208592609293e-06	-6.8598287922683e-06
pos_1237	0.00215999366219976	0.00558929811091481	-0.00212717028134198
pos_1238	0.000299897946529493	-0.000600232969305406	-0.000389759636671112
pos_1239	0.000606919118685482	0.0020678499883856	-0.000527360413118128
pos_124	-0.000923819131402845	-0.00180669085524538	0.00267660470993047
pos_1240	8.00885541732982e-05	-0.000543806229883566	6.83447266539382e-05
pos_1241	5.09308169879373e-05	5.96761798308723e-05	2.81370007217311e-05
pos_1242	0.00014182038499269	-0.000120545991116969	-0.00242115178648556
pos_1244	0.000172510393447709	-0.000363623656852706	0.000751902300792449
pos_1246	-3.95375306922987e-05	-0.000104456341751905	0.00027948825448315
pos_1247	3.91920150855938e-06	-0.000139648250935941	-0.000117080320020816
pos_1248	2.91975924690315e-05	0.000172880528551978	9.53720161415901e-05
pos_1249	-2.11008069236975e-05	-5.97653390114084e-05	-5.47242033662225e-05
pos_125	0.00198919711324353	0.00526896271113116	-0.00791282687125881
pos_1250	-3.27939972968967e-05	-6.01188668549505e-05	-0.000296316881948753
pos_1251	0.0598175417939629	-0.0423375436279496	0.147542380421415
pos_1252	-9.87251184334722e-05	-0.000212796446141407	-0.000181443912039367
pos_1253	0.000957437636002699	0.00236226123214609	0.00150768208856928
pos_1254	7.3295067436322e-05	-0.000142040163525038	8.04788065804198e-05
pos_1255	1.27903650248021e-05	0.000139615704590249	0.000111632466430099
pos_1256	0.000118369116192495	-0.000160850850516338	-1.99271334672506e-05
pos_1257	-0.00228666842216028	-0.00861419336876762	-0.000343912191107869
pos_126	-0.000405185585812708	-0.000127534336898805	-1.69578886938712e-05
pos_1260	6.93917827508762e-05	8.04752550523548e-05	8.13973335476491e-05
pos_1261	0.00017893174776407	0.000152832955752572	0.000269208649662001
pos_1264	6.77882993257167e-05	-8.74721787352972e-05	3.99099361520295e-05
pos_1265	0.0256003838062443	-0.135763111979368	0.178625876849038
pos_1266	0.000722314643340522	-0.00354523356009712	0.00577981218888331
pos_1267	1.83519504849048e-05	-1.39299606459585e-05	2.15880129842412e-05
pos_1268	0.00146299309592842	0.00816091669756855	-0.00123202136116945
pos_127	-0.00070300627297994	-0.000752084918067085	-0.000908687961383727
pos_1270	-9.48633989853289e-06	9.62984100388505e-05	0.000230426734703653
pos_1271	0.00279324076668343	-0.00910743839512738	-0.00107628600323713
pos_1272	0.00274605049336526	-0.00369446788703111	0.0118715323643987
pos_1273	-0.00017616851940002	-4.27430505571827e-05	-0.000111921527925634
pos_1274	0.00299899771499502	0.00385971457549386	-0.00542440461077775
pos_1275	4.24536549346159e-05	-0.000262886537214624	-0.000269824125558531
pos_1276	0.000601314974999932	0.000747895709900451	0.000690437989232705
pos_1277	0.00203800727732987	0.0175845328314333	-0.00943509620412793
pos_1278	-0.000365474447019328	-0.00402768948203963	-0.0055194028111003
pos_1279	0.000126775667412393	-2.78883639824935e-05	0.000220975568980304
pos_128	-0.000170514827899289	-0.132971821074205	-0.0947963732496976
pos_1282	-2.03120380694154e-05	-9.21653399405182e-05	4.91388079507093e-05
pos_1283	2.48240647549425e-05	-6.9206938731391e-05	6.75364709049461e-05
pos_1284	0.00232218246461105	0.00414501802165951	0.00189987727185692
pos_1285	9.13234900382364e-06	-1.38770273401595e-05	1.14228236507838e-06
pos_1286	0.000206609392070702	0.000718407276558812	-0.00016389449138157
pos_1287	6.31079535664256e-05	-0.000239718989783155	-0.000121112254016463
pos_1288	-0.00250813516834691	-0.00162733237740014	0.00123546401745124
pos_1289	-7.70400276093556e-05	0.00021568137846048	0.000134420729082083
pos_129	-0.00424425511598928	-0.00089901646169374	0.0206082718827773
pos_1290	2.55935749519803e-06	-3.62259818183845e-05	4.68136421055548e-05
pos_1291	0.000461162322104513	0.000652671877351001	-0.000465876274325913
pos_1292	-0.00349757507722842	-0.00598082324253396	0.0249813617668902
pos_1293	1.38186833659795e-05	2.41621484868882e-05	9.30752130333397e-06
pos_1295	0.000104016508464444	0.000212525719015871	0.000205851955848339
pos_1296	-0.000309454445687482	-0.000392330381858173	-0.000587088822580285
pos_1297	-0.00312159154145046	0.00199220167120458	0.0122487693821945
pos_1298	-8.97891259449706e-06	2.7345127851016e-07	-3.92174214041736e-06
pos_1299	-0.000923130161887935	0.000135713276832494	0.000940624505684827
pos_13	1.38037887048125e-05	-7.58288092048433e-06	-1.42507069509486e-05
pos_130	0.000436088762080206	-0.00112894073738559	0.00110714959892516
pos_1300	0.0019388774105042	0.00569961206693885	-0.00171204163354725
pos_1301	-2.43821984125831e-05	-0.000235834583885435	0.000238177499424616
pos_1303	9.4996578689985e-05	-0.000238756520056713	0.000158847685623296
pos_1304	-3.83734859680337e-05	-0.000435520477926605	0.000376275915545149
pos_1305	6.95546754091825e-05	-0.000139429207351768	0.000115816221382876
pos_1306	5.70507106495926e-05	-0.000215553477206318	0.000173835318956788
pos_1307	0.00665554088058182	0.0114575428647601	0.00578684791095504
pos_1308	0.000113838972183556	-4.44348669248128e-05	0.000340094506775736
pos_1309	2.4852015480821e-05	4.67991530933645e-05	-0.000290672594486718
pos_1310	-0.00364457603327339	0.00267274098900687	-0.000302994491654191
pos_1311	0.000208313823434797	0.000706924093404315	0.00045029795659968
pos_1312	7.38722848732564e-05	0.000394243905359357	-0.000116364245497191
pos_1313	-0.000182185995625641	-0.00132583888429953	0.000648497853496707
pos_1314	0.000377513446042828	-0.000179089688892287	0.00133779358895707
pos_1315	3.99588038285785e-05	-0.000182538717074713	5.99415273337331e-05
pos_1316	0.0364630270863292	0.135945876120106	8.32606156970267e-05
pos_1317	0.000482341231660345	-0.00104038179598823	-0.000826895932085844
pos_1318	-0.000216031803724959	0.000329512417217148	0.00179549852106092
pos_132	-7.45998229854521e-05	-0.000496829894833652	-0.00119219018928239
pos_1320	0.00356676892874676	0.00340286412193102	-0.0062255860400181
pos_1321	0.00791215549718901	-0.00781271252478965	0.0133578902114105
pos_1322	0.000237886490347221	0.00032664754054845	-3.94316046902976e-05
pos_1323	4.05588724012211e-05	-6.92004092395387e-05	-8.77108835085046e-05
pos_1325	0.00104898897279586	0.00201653838353027	0.00668080855992068
pos_1326	-0.00389573777553879	-0.00230910243465612	-0.00732242713009834
pos_1327	9.77633434099995e-05	0.000471061922067997	-2.40045208577772e-05
pos_1328	0.00119744091942029	0.00500547975727243	-0.00848475571416665
pos_1329	1.15493543448146e-05	-3.69525096041147e-05	0.000117664995279595
pos_133	2.47553026872935e-05	-0.000389178848475007	-0.00126840895528998
pos_1330	0.00215706028541263	0.00703008990387916	0.000205695031745217
pos_1332	5.23237389501633e-05	-0.00225440934580797	-0.0017279049184145
pos_1333	-0.000929554821008338	-0.00139239366812801	-0.000788397185629512
pos_1334	-0.00129445395085698	-0.0127925998977867	0.00112568185616982
pos_1336	6.20861027245489e-05	-0.000373337631212845	-3.35005870951213e-05
pos_1338	0.000129941516395472	-0.00028940575950366	0.000228025962448807
pos_1339	-0.000721139305217261	0.000320086940089767	0.000346117625738983
pos_134	0.00167113654999848	-0.00352376688592515	0.00775888971817567
pos_1341	0.0219107355126901	0.0952413821750015	-0.0343237277595387
pos_1343	6.19093158392232e-05	-0.000170372537079109	0.000115846915156433
pos_1344	0.00715618944991146	-0.0223781311869699	0.0079816097238699
pos_1345	0.000154862770924307	0.000559025873374564	-0.000628699307282615
pos_1347	-9.92667846999403e-06	-3.88341920410228e-05	-2.16477709805515e-05
pos_1348	8.13021645824741e-05	-0.000207496818740901	0.000244526722452123
pos_1349	2.45954746234178e-05	-0.000112731859069843	0.000165732729063599
pos_135	0.00119375904183284	-0.000963150338698683	-0.00791976875125964
pos_1350	0.000133048736630651	6.21924549962116e-06	-0.00245269173729815
pos_1351	0.000268659919551105	-0.000289926432313405	-0.000878166636839354
pos_1352	2.80545406927119e-06	-2.19492121502235e-05	2.23004506120515e-05
pos_1353	-0.000428116253690574	0.000188561341835988	1.91085042372438e-06
pos_1354	1.74310452313738e-05	-0.00046819619821635	-0.00057542155112694
pos_1355	-0.00226935009258497	-0.000532281912551314	-0.0010042065450377
pos_1356	0.000125249239689888	-0.000464600238561453	0.000580673208351097
pos_1358	2.92476800336353e-05	-0.000467359975151234	0.000330655650163177
pos_136	0.0430752080928042	0.056893616002738	0.113826813527012
pos_1360	0.000216672776833782	-0.000386353296810263	0.000124236941786024
pos_1361	0.000134470744462498	-0.00162970905255395	0.000769874001208989
pos_1362	5.41497283825519e-05	8.35420164530983e-05	4.89318529722504e-06
pos_1363	-3.47464557216304e-07	0.000148768015989018	0.000466091735253274
pos_1364	0.000362994883434566	0.000952160294016338	1.61842541216172e-07
pos_1365	0.00155440699565665	0.00523592987604261	-0.000290910694802249
pos_1366	-0.000215996862144258	-0.000758783337196712	-1.21342190456956e-05
pos_1367	1.62740254785094e-05	-5.95732512403578e-05	-2.13526643420794e-05
pos_1368	0.000281219642972189	0.000190064605810651	-0.000670390249416112
pos_1369	9.32651710068186e-05	-0.000118828716240252	0.000213537727704594
pos_137	0.000824283304474957	0.00115829439458472	0.00381548764428274
pos_1370	0.000137281292046534	0.000270885250064041	0.000353760394791797
pos_1371	3.54774484564737e-05	-5.10618836291893e-05	3.31234805682699e-06
pos_1372	3.82659702918406e-05	-0.000295162630645009	-0.000110884107307307
pos_1373	0.0147368572506808	0.0550653296011723	4.51238477902749e-06
pos_1374	-0.000443576670541242	-9.81084188353521e-05	-0.000351004232686482
pos_1375	0.00111623285566388	-0.00180994376228719	-0.00317645436110339
pos_1376	6.42862916656773e-05	3.46641147261425e-05	0.000275037521309978
pos_1379	-0.000140247546280243	0.000279266800153602	0.00257477909906755
pos_138	-0.00264969699506847	-0.00777525993721426	0.0205830063983926
pos_1380	4.19348568258781e-05	-0.000253508641565237	-0.000317421083892207
pos_1381	-0.000130516997624064	-0.000423935756713235	-0.00017147296117757
pos_1382	0.00030589839392057	-0.000381323280206569	0.000339654806503001
pos_1383	0.00966881264930743	0.0315891538152539	0.00476947885533082
pos_1385	-6.47293948377247e-05	-0.000150299466408044	-0.000223138123343517
pos_1386	-6.07021687892984e-05	-0.000205580776223617	0.000701531228630787
pos_1387	3.34846129310993e-05	-0.000108828003900877	-8.5215730227211e-05
pos_1388	-2.53690617906093e-05	-1.35364376890599e-05	6.51334096681932e-05
pos_1389	-5.41218686614762e-06	-8.83180312149523e-05	0.000168880579562663
pos_1390	0.00198418721650606	-0.0026868605652638	0.00460292842647563
pos_1391	-0.00137089789879621	-0.00237110482884898	0.000951257782423153
pos_1392	0.000197856865571138	-0.000754871398033553	7.60991693629162e-05
pos_1393	-0.000133754022775336	-0.000346210063048208	-0.000221961033463614
pos_1394	-0.00058577840191107	-0.00156709690185823	-0.000120135942584507
pos_1396	0.000126503972607951	-0.00100209180038196	0.000965167287810245
pos_1397	0.000359691336949452	-5.07839859430646e-05	-0.00197158752496828
pos_1398	7.41063227178635e-05	-0.00013227179767391	0.000401269910442557
pos_1399	0.000258794240765084	-0.000473983526547512	0.000333579392022748
pos_14	-3.26589127203795e-05	-3.2897015209843e-05	-6.76440988643168e-05
pos_140	0.00246729578570816	0.00376251836613151	-0.00980234864029692
pos_1400	-0.017326847898646	-0.16044353641166	0.173160173493032
pos_1401	0.00172134991355387	0.00909916801945926	-0.00114910127387344
pos_1402	0.000129195829840288	-0.00126650543224955	-0.000462556720862522
pos_1403	0.0257970827080546	0.0177492296348857	0.120863478780085
pos_1404	1.80713724675797e-05	9.41587061501909e-05	-7.14308983892801e-05
pos_1405	-3.42595182514736e-05	4.99739565372294e-05	-0.000111803123942671
pos_1406	0.00202642051203258	0.0106108792116942	-0.00151681013020984
pos_1407	-0.00150008062040736	-0.0018202786308386	8.59254073666818e-05
pos_1408	-0.000723908912940184	-0.00227505791828365	0.0026717508982643
pos_1409	5.06357520586035e-05	-0.000141024018858483	0.000150023211572394
pos_141	1.92685651745398e-05	-8.87304283231597e-05	2.29353784717408e-05
pos_1410	-1.9159505606414e-05	-0.000172073147524975	0.00101478596165541
pos_1411	0.000283030592845795	-0.00107604496674669	0.000322894204960451
pos_1412	-0.00124846619211178	0.00044106534295122	0.0024586780223291
pos_1413	-2.41150212858876e-05	-0.000229285877246445	0.000194095149519223
pos_1414	1.44819107350038e-05	-9.84881982156911e-05	3.70631080165014e-05
pos_1415	-6.9696640554926e-05	-8.86666079594993e-05	-2.17195648564922e-05
pos_1416	0.000168896612448992	-8.81818964996841e-05	0.000270687608859448
pos_1417	0.0196992839900486	0.0469077054858946	0.0232233098010484
pos_1419	2.91162733480251e-05	-1.82949577359759e-05	-0.000176951567023023
pos_142	0.000198863514882983	-0.00138500635809649	0.00124984792796251
pos_1421	-0.000103712197268401	-0.0234527589705281	0.0161524251636952
pos_1422	-3.56446513022809e-08	2.54506546735634e-05	8.23755802007482e-06
pos_1423	0.00173612648829018	0.00572079364245576	-0.00015609923784831
pos_1424	-0.000162062551785318	-0.000180948288688213	-0.000222307375941463
pos_1425	0.00416807462911383	0.0109782911872602	0.000849247228049826
pos_1426	5.51883231871243e-05	4.34228111080283e-05	9.58539950123849e-05
pos_1427	0.000211546576983841	-0.000703194893281347	0.00109076101242785
pos_1428	0.00151450763597453	-0.000945159971778003	-0.00315870368240634
pos_1429	-0.000152875410951651	-2.35464520984769e-05	-0.000134028050908414
pos_143	8.03702150580307e-05	-0.000521700272186043	0.000482847067694646
pos_1430	-0.000199441770156603	0.000268272200440663	-0.00125769665580934
pos_1431	-0.000142032699439894	0.000276339769588975	0.00097268687485501
pos_1432	-0.00016585288087159	-0.000326972391782014	0.000367739524894083
pos_1433	0.000651145176021151	0.00838790962606879	0.00307062895122011
pos_1434	0.00472519841072395	0.0083834045716521	0.0242671081292342
pos_1435	-8.1204951825098e-05	7.73997835919318e-05	0.00034179683466773
pos_1436	-0.00016141209091434	-0.00627455231495092	0.00777478854626303
pos_1437	0.0184671775222309	-0.0234401700332353	0.0443736492667063
pos_1438	0.00107550875887528	-0.00129976307152293	-0.000172090761571613
pos_1439	0.00110734362210444	-0.000780121494489708	0.00198953490395133
pos_144	7.55538487929918e-05	0.000122596385738753	-0.000221223049952763
pos_1440	2.15852742239697e-05	-0.000125097188741889	3.69190003506726e-05
pos_1441	0.00028251495871721	0.000897479533407597	0.00020542392901657
pos_1442	0.000339731437910741	0.000415619793037312	0.00320803554051885
pos_1443	-8.16814330615623e-05	-0.000132516711512977	-0.000906859178601717
pos_1444	8.04131369976288e-05	-0.000750368394340112	0.000305574804846093
pos_1445	0.0047701798071285	0.0202871048625323	-0.00971116941721228
pos_1446	0.0001187585540867	-9.20126891986064e-05	0.000611786881052078
pos_1447	0.00788986082300922	-0.00354173075915564	-0.0569637127054987
pos_1448	-0.000533467038079469	1.93275640659963e-05	-7.35089673555411e-06
pos_1449	0.00130849507062489	0.00128176446428486	0.00183007058181545
pos_145	2.24561639812151e-05	-0.00012735027500608	0.0002700370702425
pos_1451	-7.34215229913366e-05	2.77889455467311e-05	0.000421910993837686
pos_1452	6.04132703582239e-05	-0.000199888341876452	-6.56560559723222e-05
pos_1453	0.000162527570784602	0.000216728248512489	0.000109618934590156
pos_1455	0.0191293660341959	0.0813135979867393	-0.0246908989714032
pos_1457	6.40451045878707e-05	-0.000307977053032355	0.000343915050099322
pos_1459	0.000158635563345565	0.000220467106353381	0.000529030134814092
pos_146	0.000182854824056631	0.00199143016038523	0.00252566669175181
pos_1460	0.000254503437159405	7.77234975412648e-05	0.000157748774489162
pos_1461	3.70406608483293e-06	-3.6084554794612e-05	3.9694784646363e-05
pos_1462	0.000447154277738981	0.00144922083085928	0.00108141016773433
pos_1463	6.45645793111804e-05	-0.000509969582025559	0.000578531618434415
pos_1464	7.34681864401557e-07	2.43573093299761e-05	-9.34826632052595e-05
pos_1465	-0.000355454614033306	-0.00031145929327769	0.00255881004464342
pos_1466	-9.38970919551469e-05	0.00019841298978436	0.000878306429392103
pos_1467	1.67743212286945e-05	0.000100575344448	-0.000204176625858942
pos_1468	3.48914914162411e-05	0.000124872423344422	3.91732818965217e-06
pos_147	-0.00115709292558696	-0.000490919784488629	0.00298487919329432
pos_1470	0.00012039596244324	0.000360810772757775	7.67933817351288e-05
pos_1471	0.00015775075991444	0.000186903781469192	0.000220882626431524
pos_1472	8.98190207692625e-05	-0.00168789443882135	-0.00243011373177546
pos_1474	0.0012811128777373	-0.000412278221790207	0.00196540249829876
pos_1475	-0.000256784895168096	-0.00086854052014971	-0.00283384010598318
pos_1477	0.000192153548904081	-0.00010631387937242	0.000739046289245962
pos_1478	-0.0110098547663237	0.00623417680635069	0.00161431445793794
pos_1479	-2.30675208176956e-05	-3.8162009390956e-05	2.99103025874362e-05
pos_148	0.000139360936966414	-0.000564873287371889	-0.00120445518416278
pos_1480	1.04294637583523e-06	3.77657143902768e-05	9.16346288367961e-05
pos_1481	-7.75444586247653e-05	-0.000111253453894091	-0.0001032047682266
pos_1482	5.52289400811887e-05	-0.000169076249491334	-9.39870032421526e-05
pos_1483	-1.39104879744207e-05	-5.28458809154185e-06	-0.000101906426599944
pos_1485	0.00452111069488159	0.00574741341340187	0.00435554649723796
pos_1487	2.17110814329235e-05	-8.7345538819088e-05	7.9649639409375e-05
pos_1489	0.0046737633729062	-0.0267660142678528	0.00442788040539246
pos_149	0.000189571712859701	-0.000674741985348543	0.000640661241645128
pos_1490	-0.000466662275964119	-0.000315788542081595	0.000461306689282317
pos_1491	1.42523472351741e-05	9.60833614621276e-05	6.03417761737363e-06
pos_1492	-6.26073173288929e-05	-0.000377914114951396	-5.4960477458297e-05
pos_1493	5.18869082980498e-05	-0.000159754255141982	-0.00017109195708536
pos_1495	0.000196848099088109	-0.000351687763960839	-0.00142242020885786
pos_1497	-7.07802154361813e-06	0.000119354833574551	-9.15633596309191e-05
pos_1498	0.00723413692761758	0.0270668180173633	-0.00102641516731591
pos_1499	0.00102459602140172	-0.00116099533429512	0.000299987959526708
pos_15	0.00383773095842437	-0.00291220205217042	1.60682908601383e-06
pos_150	0.00061920042353373	-0.00806490644634409	-0.0109609176411667
pos_1500	0.00126267989534928	0.00646474191028657	-0.00104140151970766
pos_1501	-0.00142342336698132	0.0091455057218182	-0.00766780420434887
pos_1502	0.000340080499581085	-0.000983677086202694	0.000926466118457853
pos_1503	0.0069147795763512	0.0231029167744474	0.00100661818397878
pos_1504	3.57811477147438e-05	-0.000736196823394958	0.000150011381483956
pos_1505	0.00160839741756107	-0.000895030928898921	-0.0104982672809992
pos_1506	0.00333347026154417	0.0106319588701752	0.00020618423954503
pos_1507	0.00494024997997066	0.0153190144595189	0.00163575655048815
pos_1508	0.00293987100689989	0.00707855929339632	0.00352721103818622
pos_1509	4.23259926376753e-05	7.11604025598274e-05	8.52743463558015e-05
pos_151	-0.00146539770410956	-0.00438974827087597	-0.0151252402220673
pos_1510	0.001469509144422	-0.00328150655201738	0.00476362375432672
pos_1511	0.0017304884950893	0.0095506355598624	-0.00166436791615281
pos_1512	0.00320859122789357	0.0165576963769957	-0.00636940584837809
pos_1513	0.000702187562955076	-0.000144331434124196	0.000920155437735514
pos_1515	0.000169759603107585	9.52222926857028e-05	0.000244557389788728
pos_1517	4.08026024691008e-05	3.40984159134526e-05	5.39845768315865e-05
pos_1518	-2.19767963383282e-05	-9.22556484910608e-05	-6.00317365430556e-05
pos_152	0.000377130435955032	-0.00034288663051484	0.000996841480284479
pos_1521	0.000473061720744369	0.00725028239667784	-0.00406615342377555
pos_1522	6.81782857586287e-05	0.000464680071824528	1.11283599747108e-05
pos_1523	0.000578412015633496	0.00101930073215563	0.0024953468068414
pos_1524	-0.000206181170155242	-0.000136783077921112	0.000134192929140601
pos_1525	4.57590643506307e-05	3.08573862460293e-06	-0.00013657195185614
pos_1526	0.0111308724100238	0.0471139699453529	-0.0137164608955441
pos_1527	-0.00272699964712644	-0.00511646172978015	1.2247407707056e-05
pos_153	0.0194711167747628	-0.00412135996096551	-0.00547057430461732
pos_1532	-3.23443943708636e-05	6.97264007763254e-05	0.000240436676645731
pos_1533	0.00204896915879636	0.00398230681065451	0.0042457506339819
pos_1534	3.97331631125007e-05	-8.86104307626748e-05	-7.61979023182498e-05
pos_1536	2.09025958708856e-05	-0.000504150524230261	-0.00181395638923774
pos_1537	0.000291438083770116	-0.0002032637068142	-0.00118089028584362
pos_1539	1.11411241617853e-05	-8.89973502866862e-05	0.000102630263000599
pos_154	-0.000370462196826742	-0.000358261846309331	0.000224377243669077
pos_1541	0.000530280464478446	-0.00255589737453409	0.00262192561054546
pos_1542	-0.0213469403563772	-0.00362435914855784	-0.0118823896215792
pos_1543	0.00138903265503828	0.00396585998393106	0.00136885312845636
pos_1544	-0.000485089001938822	-0.00151972608856998	0.000275561444367424
pos_1545	-3.00884420211123e-05	-5.76792188414052e-05	0.000277661081987072
pos_1546	-2.08471001543061e-05	0.00012833652877866	0.000109019025308836
pos_1547	-3.76002110322327e-06	-0.000116120917792854	6.70002429278787e-05
pos_1548	-6.0388607836687e-05	-2.43052517177297e-05	-3.3883275858512e-05
pos_1549	-0.00204736594122285	-0.00375314943297813	-0.00867221414777521
pos_155	-6.38047135823838e-05	-0.00212121672768436	-0.000840173513199277
pos_1550	5.30464218933807e-05	-0.000327684740615013	3.09643386931383e-05
pos_1551	1.96510463669079e-05	0.000126685324596696	-8.15238201867082e-06
pos_1552	-0.0010840639585112	0.000604861580065954	0.000546923014149551
pos_1553	1.81246810495572e-05	-0.000119177152693973	0.000185275507493496
pos_1554	-0.000253518996927532	0.000363942743259555	0.00128319237337276
pos_1556	-0.000201891200930951	-0.000492281003598071	0.000134713555468068
pos_1557	-1.77134513857852e-05	4.3182980189431e-05	8.45361803374545e-06
pos_1559	9.36003408914567e-05	-0.000358406997576833	0.000999401967852292
pos_156	-2.51729197288215e-06	-4.4475738240721e-05	-4.34426931781772e-05
pos_1561	2.13172190164958e-05	-9.62223052502224e-06	0.000252537764918311
pos_1562	-2.74001440507829e-05	-0.000561737104798664	0.000616694964782847
pos_1563	-7.29969059967506e-05	4.099667600262e-05	0.000202430542958952
pos_1565	0.00114426830434456	-0.0024404004145844	0.00282740352642158
pos_1566	-0.000216938526492544	-0.00050110368860475	-0.00165902557471384
pos_1567	0.000410303006166688	0.00234337272278955	-0.000461663485549271
pos_1568	-0.000760933918214282	0.000221185042580773	0.000647111860420396
pos_1569	0.0189150729562533	0.0825668048470547	-0.025493796513518
pos_157	-0.00314613638495419	2.75687919404719e-05	-0.000710940207102441
pos_1570	0.00032721027069641	-0.00100970607009294	0.00103716673448697
pos_1572	0.0021839015530323	0.00728986027170764	0.00598306838990974
pos_1573	5.73242167102049e-06	-3.48388617464653e-05	-4.88904122638692e-05
pos_1574	1.29020010810821e-06	-0.00152308507049189	0.00228996755554117
pos_1575	-6.70086958952735e-05	-0.000150137977074794	-0.000159683045932873
pos_1576	1.62498184777012e-05	-0.00052387527810493	-0.000235120624705702
pos_1577	9.88566513902952e-05	-0.000241456304917646	-0.000345232272101531
pos_1578	-2.12465316436322e-05	-9.37993474248945e-05	0.000170253994971499
pos_1579	0.00118570549180357	0.0041186153491796	-0.000363661175015284
pos_1580	-1.69515758577581e-06	-3.22137631036936e-05	0.000123488296060496
pos_1581	-0.000317758668818582	-0.000395163581367473	-0.000630623200828548
pos_1583	0.000448426962542139	0.00203007133388381	-0.000147687597488739
pos_1584	-3.31249264281808e-05	-5.63298819503539e-05	-1.30331794447245e-05
pos_1585	0.000165411093601578	-0.000503792629496048	0.000383357296617753
pos_1586	-8.27842385693385e-06	8.85350419532074e-05	-5.57411373626508e-05
pos_1587	-0.064811335349616	-0.065897878424158	-0.00135178615364466
pos_1588	0.00141027858696926	-0.00693218450158915	0.00912220889988697
pos_159	-8.45063044177568e-05	0.000966240248109025	-0.0021666586741479
pos_1590	0.000281476348342738	0.000860750533915926	-0.000255465649315423
pos_1592	0.000338018048697555	0.000162970200698175	0.000538087104348033
pos_1593	0.0141833307343364	0.0418638665386857	0.00795218094947933
pos_1594	-1.7929870068735e-05	-5.79388700659963e-05	-0.000180106706924931
pos_1595	0.000145575272778212	-0.000407831176249466	4.44278102879094e-05
pos_1597	0.000116896121867723	0.000460390054315406	5.34048316374379e-05
pos_1598	2.29210082549927e-06	-0.00011972280794492	6.80189904272473e-05
pos_16	0.00060975604412958	-0.000863062934333755	0.000796866783743303
pos_160	-9.02602220962196e-07	0.000303424635418318	2.34320823878689e-05
pos_1600	-0.00505060363053788	-0.0111016606168789	-0.00659301109171659
pos_1601	4.71509109332861e-05	-0.00012056026160006	9.51439654754445e-05
pos_1602	-0.00204755806651492	-0.000742625236287108	-0.00950221532965415
pos_1603	3.80789764896359e-05	1.97322221528674e-05	-8.60407780670959e-05
pos_1604	0.000730535710201134	0.00192499369072634	0.000139884759220602
pos_1606	8.32148655265729e-05	0.000150420967621864	9.98021390824602e-05
pos_1607	0.000183428508263875	0.000575569762790192	1.354694332396e-05
pos_1608	0.000105375533599496	-0.000373042752358404	0.000422661170865581
pos_161	0.000119263131028515	-0.000192384028073424	-0.00023315965791461
pos_1611	7.0114645779441e-05	0.000200868813558598	3.91005530931578e-05
pos_1613	0.000614552586970735	-0.000310795158892653	0.0011980082658616
pos_1615	2.57938767191818e-05	-0.00024680030178219	0.000316364234281697
pos_1616	-0.00246800368210815	-0.00255804649897797	0.00128742539202689
pos_1617	6.18306415894113e-05	-6.11300234901039e-05	6.80358997536633e-05
pos_1618	4.67614886714083e-06	-1.71738584639641e-05	2.86647620073555e-05
pos_1619	2.0475605563059e-05	0.000131311710793764	-5.89643316144002e-05
pos_1621	0.000373631568792962	0.00135048290052312	-0.000525332578144122
pos_1622	0.000157911160530343	-0.00022888881827522	0.000728625461086422
pos_1623	0.000431700102740916	0.000104424088106347	0.000611518571296214
pos_1624	0.00052627571661012	0.00106429247963099	0.000197213666944416
pos_1625	-9.70762160204057e-06	-0.000272838611382759	0.000393524699546066
pos_1626	0.000188236253161892	-0.000367098612187019	-4.98543023937276e-05
pos_1628	1.05312001304087e-05	0.000117496785239678	-0.000108421053713217
pos_1629	0.00023425628350438	-0.000922708485507649	0.000900677537687258
pos_163	-0.000232237358249187	0.000862925467865409	0.00276307062994184
pos_1630	0.00228376831193689	0.00161919818658878	0.00355899177273548
pos_1631	0.00013158792644317	2.4816054461119e-05	0.000241465255410281
pos_1632	0.0682102752817462	0.206428490871807	0.0265230305751784
pos_1633	0.000271164925237181	-0.00101813653604128	-0.00414846957776276
pos_1634	0.000145193322924965	0.00203328679594172	0.000706405543913923
pos_1635	0.000333473382708313	-0.000149429790358131	-0.001102125794818
pos_1636	0.0004427710831437	-0.00042710744065853	0.000355110082949362
pos_1637	0.000924068246200244	-0.00467556808962075	0.000776593583315873
pos_1638	3.43299248776999e-05	-3.59687105078883e-05	0.000183067500206725
pos_1639	-1.11798171453922e-05	-9.76216063438752e-06	1.09013564018083e-05
pos_164	0.000522487167913533	-0.000618615923853161	-0.00061838072514774
pos_1640	-0.000629206430292367	-0.00108262767235981	0.00112644775945537
pos_1641	0.00249612612358966	0.00954342869742038	-0.00593784934188104
pos_1642	0.00015254465899325	-0.0014632176220154	0.00105377302445139
pos_1643	0.00290910046901567	0.00156783951566181	-0.0259988524987987
pos_1644	4.54806199442634e-05	0.000347679443893735	-0.000509915172308791
pos_1645	0.000584914225969023	-0.000937530619362503	-0.00563250554531161
pos_1646	0.000495762601692589	0.00202812028503559	-0.000340648052481796
pos_1647	4.19785245817026e-05	0.000227959426484715	-3.73398930157112e-05
pos_1648	0.000437178421469144	0.00128744277190763	-0.000309755893581357
pos_165	0.00101467959544192	0.00269131728129229	0.000613304267103453
pos_1650	6.61192493240367e-05	-0.000282227981840417	0.000122743053500866
pos_1651	4.82672044336968e-07	-4.91731578689054e-05	6.53173223432147e-05
pos_1652	-0.00029197294766784	-0.00111308588297179	-0.00120542643748198
pos_1653	1.97088953799494e-05	3.51288935473497e-06	0.000171981800308226
pos_1654	7.58032073739553e-07	-0.000104518434399654	7.81770105993389e-05
pos_1655	0.000177416437885849	-0.000265425140457498	0.000249246755945487
pos_1656	-7.77522782245765e-05	-0.000153608696088325	-0.000759178658510561
pos_1657	0.00134532950205935	0.0040481998167265	0.000181627108882283
pos_1658	0.00025371904519402	0.000485751810770335	0.000347744449091177
pos_1659	-7.3849033278287e-05	-3.90616772994801e-05	0.000143095127654461
pos_166	0.00568713106551211	0.00214684003346384	-0.00336704494203024
pos_1660	-0.000835622308138616	6.92773468040623e-05	-0.000249908422871212
pos_1661	9.16503868340653e-05	0.00049855883312698	2.1301276743412e-05
pos_1662	1.12286908793633e-05	-3.71576098325534e-05	3.50839683863445e-05
pos_1663	-3.83275214907849e-05	-0.000788418678739155	-7.88094736532997e-05
pos_1664	-0.00232477917948621	-0.00195020922416126	-0.00106611668855656
pos_1666	-5.53690513635193e-07	-0.000239395147670038	-0.000261043290927305
pos_1667	0.000179724473856058	-0.000892969030552509	0.000375988054251778
pos_1668	-0.000196353349494	0.000518501888684915	0.00164943569508558
pos_1669	-6.81587964029711e-06	-0.00019855225361595	0.00025829856703225
pos_1670	-4.80724596688842e-05	-8.57420472761262e-05	-0.000199774007030103
pos_1672	0.00110690973505829	0.00608700655553143	-0.000764693846847316
pos_1674	3.54228156419364e-05	-6.01426913303281e-05	8.85607441878366e-06
pos_1675	1.20425565301094e-06	-1.28714495534883e-05	2.80189025073671e-05
pos_1676	0.00512869625148905	-0.00148089670398995	-0.0144146729203918
pos_1677	0.00222377363479262	0.00345409756072327	0.00420962566411482
pos_1678	-0.0109650108223777	0.0163385746670528	0.0174109502977008
pos_1679	2.21249573983068e-05	-0.000721702219511931	0.000860393244401816
pos_168	0.000289144616798448	-0.00107778243978001	0.00066687944169886
pos_1680	0.00019768785509376	0.000720607300848163	-0.000160576076678081
pos_1682	6.61493131251934e-05	0.000322732552428002	4.82456151556216e-05
pos_1683	-2.30435624255963e-06	-1.42211630847447e-05	3.5226277148683e-06
pos_1684	0.000711304237422455	0.0024268559618727	8.45109144360576e-05
pos_1686	3.35294035349447e-07	7.6422252389082e-06	5.48607724748774e-05
pos_1687	0.00163347395465709	0.00855614611609331	-0.00125143003190842
pos_1688	-6.36168800005833e-06	-2.48040433734013e-05	3.57531917053909e-05
pos_1689	0.000842240455000575	0.00151200419577963	0.00222031241408312
pos_169	0.000590970959828652	0.000965496309920574	0.0028177918562502
pos_1691	-0.000399276790009161	-0.000341895299378195	-4.05942751669131e-05
pos_1692	0.00158734895622042	-0.00317585919235899	0.00202775740652892
pos_1693	0.000193047693887781	-0.000811786346814461	2.38674423043687e-06
pos_1694	-7.21589830016289e-05	-6.15129868452025e-05	0.00014391035983815
pos_1695	0.000182357171687926	-9.87342185459187e-05	4.38961912245564e-05
pos_1696	-1.66067924263125e-05	1.56807962720019e-05	4.6944685836244e-05
pos_1697	-7.01854393613883e-05	0.000256805669925277	0.00200807956755692
pos_1699	1.42493199999044e-05	-2.81371047431681e-05	7.72202967186289e-06
pos_170	1.90290386438156e-05	-0.000173432258500997	0.000295952510271708
pos_1700	-1.2093843464377e-05	0.00019187750578402	0.000146195167642609
pos_1702	-0.00338772041423793	-0.00151611657189246	0.00698135986255724
pos_1703	0.00194636338544278	-0.00215401050822938	0.00223701926356781
pos_1705	0.000217110204106954	-0.000253144452527874	-9.00565071207226e-05
pos_1706	2.46717274000702e-06	0.00022807483330249	-7.75961889649793e-06
pos_1707	6.41199678609747e-05	0.000377289123385689	-6.90386934491879e-05
pos_1709	0.000124214032882351	0.000264728824478042	0.000292691597385953
pos_171	0.000900597269165071	0.00144164262937139	0.00348020000486198
pos_1711	0.00174371062927665	-0.00301180412645463	0.00351448381515286
pos_1713	5.61275008920771e-05	-3.64489138778861e-05	-4.00005161615825e-05
pos_1714	0.000120277103942739	-0.000200369597788958	0.00043667608850851
pos_1715	8.91583371129885e-05	0.000201196235500627	-0.000151531256873295
pos_1716	0.0002008665922939	9.52048312386486e-05	0.000108751562817936
pos_1717	-4.21774244622602e-05	5.56460413515735e-05	-0.000308848055814778
pos_1718	0.000765768844644958	-0.001686127568324	0.00159350783068254
pos_1719	9.37818683585744e-05	-5.71385313755462e-05	5.49035958926718e-05
pos_172	-1.29826251729393e-06	-1.59918827260007e-05	3.8201467462e-05
pos_1720	-3.6180336274888e-06	-0.000139934847063103	-0.00023212307008506
pos_1721	1.62041567228021e-05	5.46100257114978e-06	-9.81291810917987e-06
pos_1722	0.00411326179621629	-0.0118946800061822	0.014760239090575
pos_1723	0.000571172368458553	-0.00459826651438923	0.00502343065120569
pos_1725	8.35744729977671e-06	2.28193820945833e-05	-9.79098030893084e-05
pos_1727	-0.000747920576102435	-0.00107245262449531	-0.00032974138134653
pos_1728	0.000160252218178764	-0.000330435168490742	0.000385390388566453
pos_1729	0.00189635883301496	0.010737479379588	-0.000790405975399768
pos_173	-0.000698881388401318	0.000353309291309689	-0.000896082496360916
pos_1730	0.00115591068614743	0.000472369782031293	0.00190123248911332
pos_1731	9.35802267415967e-06	7.73946130770335e-06	2.95485512421878e-05
pos_1732	0.000415168876158506	-0.000794219749342836	0.000754411052631195
pos_1733	8.98757438516692e-05	-0.000968300501022143	0.000508486163700766
pos_1734	-0.00128041520617441	0.00045517124044526	0.00747675357416677
pos_1736	0.000241857172315209	8.20552304867093e-05	0.000317439513645525
pos_1737	-0.000626199031168721	-0.000905045096806356	0.000870108309236246
pos_1738	-0.0011299182499474	-0.00142497872537195	-0.00117500379770306
pos_174	-0.00211790898321659	-5.1317907422068e-05	-0.00028451828866579
pos_1740	-0.000859381549807704	-0.000785791502547928	-0.00357500697178294
pos_1741	9.26790402921754e-05	9.68334571709964e-06	0.000156117002475483
pos_1742	8.54130313802444e-05	0.000480275361289629	3.42691639440848e-05
pos_1743	0.0015341472282841	0.00808984209131241	-0.00133666561114936
pos_1744	5.22236717169764e-05	7.41633222926308e-05	2.49472776160788e-05
pos_1745	-1.30873291975874e-05	-0.000208551620082767	0.000128790136566874
pos_1746	9.00614006736584e-05	0.000102636130438785	0.000219947641423562
pos_1748	-0.00801682137816094	-0.015210737381815	-0.00938178605779542
pos_175	-0.00163867382329745	-0.000282068758408321	0.00221744391116751
pos_1750	-8.40422549344081e-05	-0.000434632123740477	-0.000184400052428788
pos_1751	0.000859255060227613	-0.000282870615338645	-0.00067571938393147
pos_1752	-0.00083177049823549	-0.000362529050827743	-0.00256609681153445
pos_1753	-0.000182633077452753	-0.000207468767416733	-3.90669394536887e-05
pos_1754	1.48932829500404e-05	-7.99688997657064e-05	-1.40750887695379e-05
pos_1756	-2.73374562167184e-05	-0.000544192553994919	0.000513964243360794
pos_1757	-5.11805688377705e-05	-0.00104931130090743	-0.00168004794319179
pos_1759	0.00050753889335452	0.0027868028919216	-0.00061976014266197
pos_176	0.000744497736508757	-0.000426445530096701	-0.00225664823122817
pos_1760	0.000501994671466675	0.00239217352796947	-0.000241193849261359
pos_1762	-1.65268522299326e-05	0.000119612819161226	-9.21249060291255e-05
pos_1763	2.87812654930984e-05	6.22342458072365e-05	-5.18438726581763e-05
pos_1764	-0.000100899247487591	-0.000263188737296075	-0.000177050834868281
pos_1765	-0.00843993393575346	-0.00463776513503499	-0.0171929715367041
pos_1766	-0.0394582657591241	0.00179572990865412	0.00983443731364463
pos_1767	0.000722829146961555	0.00443117659715762	-0.000746458118716808
pos_177	0.000448832745595979	0.000684750326089254	0.00221964869226255
pos_1770	-6.61366530211885e-05	-0.000112115260122786	-7.58379236114867e-05
pos_1773	-1.25152381498872e-05	-1.77855299544324e-05	0.000266426245109766
pos_1774	2.59617380416401e-06	-4.8682910554051e-05	7.25942391068645e-05
pos_1777	0.000366139403797706	0.00220517529593505	-0.000500381904818157
pos_1778	-3.47693529719672e-05	-0.000128077856406623	-0.000262189286042278
pos_1779	0.000170611049549141	-0.000279254272381119	0.000288224547886272
pos_178	-0.00198662066967708	0.00206830376991603	0.0165339371605324
pos_1781	0.000179538952810784	8.2921345030976e-05	0.000636959622842185
pos_1782	9.59861643661958e-05	0.000419215839067607	-0.000123370181291646
pos_1783	0.00138548386218567	0.00623240800549022	-0.000373587481225692
pos_1787	0.00405641584718574	0.0105639786264333	0.00153243013032015
pos_1788	0.0132785534823408	0.0511178319256149	-0.006054161395609
pos_1789	0.00866602187761603	0.0303194121601689	-0.00495872714095858
pos_179	-8.08851751075423e-05	0.00027303498762063	8.06110103151897e-06
pos_1790	0.000108844803084332	0.000181150001090389	8.35620501479664e-05
pos_1791	0.000547280443501751	0.00323851292566359	-4.2594823518892e-05
pos_1792	-1.70665513268535e-05	-1.13819002784672e-05	4.00080434794385e-05
pos_1793	5.28986074835645e-05	0.000260675407138153	-0.000135689621750227
pos_1794	0.00292400577273449	-0.00680840453610955	0.00954006525187025
pos_1795	0.00166550694159529	0.00501813056130567	0.000292294967766441
pos_1796	-0.00280034493160759	0.0312150223795191	-0.0139564727659663
pos_1797	0.000139008446006747	0.000262883658047971	-0.000135006784927449
pos_1798	-1.74309312020922e-05	-6.29669356891689e-05	6.19154698518921e-05
pos_1799	-1.82858331931746e-05	-7.16159483952282e-05	0.000140636208233459
pos_18	6.37831852775535e-05	0.000286541934322298	-0.000235669486544394
pos_180	-0.000142312199195767	-0.00144385955438233	0.00113627608621955
pos_1800	0.000292500916608562	-0.00065925538398345	0.00102451132789348
pos_1801	9.24665209241367e-06	-3.45350699224887e-05	3.91044223670598e-05
pos_1802	0.000127554251329915	-0.000257441186241008	-0.000121333872080198
pos_1803	-8.44414454977806e-05	6.46042537722051e-05	0.00110564458893162
pos_1805	0.000424343365214458	-0.00104686760623131	-0.000697294193194485
pos_1806	0.00153991306218279	0.00477032970992263	0.000775960750445409
pos_1808	0.00103997687890929	0.00543206264868142	-0.000762250410320554
pos_1809	-0.000106362438964327	-0.000425028369712668	0.000488628635412351
pos_181	-2.01827060861063e-05	-0.000185426058303109	0.00066121845735601
pos_1810	-0.0001661764956897	-3.02951130742452e-05	-0.000172322640386527
pos_1811	6.70031613361158e-05	-0.000162507922382849	0.000178062390691278
pos_1812	0.000361976709077097	0.000312813266022642	0.000762921433972941
pos_1813	5.2017909879405e-07	-0.000758068990737954	-0.00212962480487816
pos_1814	7.4375663648244e-05	6.52265227722447e-05	0.000151983083865977
pos_1815	-0.00049935512479679	0.000554931289216735	-0.00172287077347601
pos_1817	-1.07397628713489e-05	-0.00019208899820043	-0.000200823846590367
pos_1819	-0.000477400397200798	-0.000123346179740213	0.000523578523604483
pos_1820	0.00142507102816591	0.000999730740388829	3.3678477518663e-05
pos_1821	0.000296545827896572	-8.1229863261192e-05	0.00129388167304471
pos_1822	-0.0022662994488978	0.000660347031315426	-0.000336176452476994
pos_1823	9.72302257615375e-05	-0.000350163956536754	-0.000466265270590185
pos_1826	0.00162155258161843	0.00417053604621035	0.00143226154114366
pos_1829	9.55155971093582e-06	-0.000273431637539054	-0.000146676402790782
pos_183	9.45470861465431e-05	-0.000364533939876515	-0.000322271844978401
pos_1830	-0.00472384945082259	-0.0106174043956177	-0.0235961166015055
pos_1831	8.91611176463328e-06	-4.35678586564112e-05	3.37413505613259e-05
pos_1832	0.00192596382569478	0.0101423731720263	-0.00167329263151561
pos_1833	0.000337088512559981	0.000487984407024138	0.000538474094796126
pos_1834	-1.89135448407645e-05	-1.26364812642575e-05	9.82220166840406e-05
pos_1835	-0.000246972308973568	-0.000109149722061512	-4.69335703073918e-05
pos_1836	-0.000954507113846768	-0.00166282723347591	-0.000950919781868587
pos_1837	-2.18635118657036e-05	-8.99131557357529e-05	6.6183038805909e-05
pos_1838	0.00092219058733958	0.00273981122197307	0.000621793257322781
pos_1840	-1.34534905717272e-06	5.40368467201419e-05	2.46461329305728e-05
pos_1842	0.000211005831311456	0.00039340365296241	0.000170662566876087
pos_1843	0.00018814825055865	0.000954085911025722	-0.000185928653848532
pos_1844	-0.000783101932599498	-8.03357325106703e-05	0.00494229164669082
pos_1846	-2.5281732973813e-06	-3.54652900831403e-05	-9.34311340009476e-06
pos_1847	-1.24523222403529e-05	-4.53949996876835e-05	4.91518465811349e-05
pos_1848	0.00162532008914962	0.00587691615118362	-0.00174417717021752
pos_1849	-0.000532364754638384	-0.000300985445826748	0.000345175628138641
pos_185	0.00288276089059243	0.00868662410646012	-0.0044231237797294
pos_1850	1.58000774207333e-05	-2.99868376242648e-05	-7.49966650967522e-05
pos_1851	-1.21556131380899e-06	-0.00038722434685033	0.000323379085436064
pos_1852	-0.000570670480423914	-0.00238882970647718	0.00433953410886796
pos_1853	7.75034185050664e-05	-3.01513406679687e-05	0.000547498105166559
pos_1855	-0.00159057159400973	0.000273575956430452	0.000324724479578667
pos_1856	0.00103963246257891	-0.00025254807781267	1.23331491420804e-05
pos_1857	0.00101909768277503	0.00306869330330851	-0.0122323207882147
pos_1859	0.00202107039178217	0.010444834074141	-0.00187515476102773
pos_186	0.000347451914681644	-0.0018276518032662	0.00162934473874282
pos_1860	2.20773534550925e-05	-8.42805024191057e-05	9.82225225869355e-05
pos_1861	0.000232242607146628	0.000177193270645669	0.000242278239993936
pos_1862	0.000598047026183965	0.00212551618247793	-0.000499939585225958
pos_1863	-0.000131332833669579	-9.79712444135266e-05	0.00104129498863045
pos_1864	0.00153800766217309	0.00475729670328303	-0.000176413854931758
pos_1865	-0.00203587316699382	0.000694134941314977	-0.000539048584264685
pos_1866	0.000171013214795821	0.000802582680682244	0.000273603485806185
pos_1868	0.00120624399575083	0.00152791461687659	0.00238040487494642
pos_187	0.000133203388535901	0.000599589941272763	0.000990529081925739
pos_1872	-3.21370023682488e-05	-0.000487275616732302	0.000675159491012955
pos_1873	0.000224002477611302	0.000655503152054299	0.00072595309736821
pos_1874	0.000232503129731502	0.000272688011758538	-0.000144440034518468
pos_1875	0.00152212594209641	0.00744548145986791	-0.000484398742260486
pos_1876	7.32061794215526e-06	0.00010622410618524	8.18646262943845e-05
pos_1877	0.000298093921813038	-0.000192987865788376	-0.000858404553067403
pos_1878	5.40583430593089e-05	-9.73760632488779e-05	-0.000576452252082454
pos_1879	-7.41056794883449e-06	-0.000329776658058869	5.31801969171998e-05
pos_188	-0.000519884278314614	-0.000852600223018593	0.00039604825813634
pos_1880	-0.000768800611131446	-0.00184927712987964	3.08038550785782e-05
pos_1881	0.0241054589794935	-0.126728848802477	0.093186477423804
pos_1882	-0.000444359659630762	0.00353156278984422	0.00767301580013761
pos_1883	7.10971616573931e-06	-1.26509090902569e-05	3.78533577406067e-05
pos_1884	0.000636666004715474	0.00356959218450633	-0.000483662070933844
pos_1885	1.75114579605263e-05	-7.51385287622051e-05	-5.46929292223397e-05
pos_1887	0.000370013432083457	-0.000728604084793412	-0.000772383858409723
pos_1888	-4.7634523316096e-05	-0.000534068963095543	0.000415146502579928
pos_1889	8.25708192486721e-05	-0.00125425208023906	0.000834594761662025
pos_189	0.000953104573742502	-0.00235096963699894	0.00472007970126358
pos_1891	0.00133099309218215	0.00450378747151909	-0.000372705162584293
pos_1892	-0.000143933488086524	3.24540315852081e-06	-0.00077162488779598
pos_1893	2.6035123545992e-05	-0.000108354421068575	0.000183617339269761
pos_1894	0.0046535140294066	-0.00860937019211283	0.0202522289957024
pos_1895	-1.7645944689579e-05	-2.3651269983386e-05	1.2695623296053e-05
pos_1896	0.000177076226810867	-0.000229628565760662	0.000381269226335054
pos_1897	-0.000647057827507116	-0.00134125244561725	-0.00191124319444709
pos_1898	-0.000880647377065137	-0.000575745197198147	-0.000205716659961249
pos_1899	-4.51390059232445e-05	3.67015032381351e-05	0.000170710828552407
pos_19	0.000466487186658313	0.00171957562473596	0.00103230606641051
pos_190	0.000831688033993461	0.00423981296963282	0.000553469648905241
pos_1900	0.000323861243200677	-0.000808110814115809	0.000237109230475419
pos_1901	0.000197716864127986	-0.000416221895242758	0.000102336062844072
pos_1902	1.54938232365139e-05	2.33260214709109e-05	-1.21963298432116e-05
pos_1903	1.71554040010391e-05	0.000222588255396847	-0.000123282181085842
pos_1904	7.64598861160034e-05	1.38051029328829e-05	3.38268098760307e-05
pos_1905	3.15253736162449e-05	0.00416132608227966	-0.000517316769478646
pos_1907	0.000466220982680209	0.0023755433177093	-0.000559647756212545
pos_1908	0.00021652871977336	0.000852820888161575	0.000882299965643134
pos_191	-0.0143974289839896	-0.0135341209576201	-0.00601738093796716
pos_1912	0.00139613672263156	0.00805962088708209	-0.00123238054560476
pos_1913	0.00015592890134978	0.000870161258675945	-0.000403405434317664
pos_1915	0.000335420613351862	0.00139042340824441	7.0420593645816e-05
pos_1917	0.000279353774838187	7.44641819060305e-05	-0.00315760091865716
pos_1918	1.04523805716535e-06	8.03824811796137e-06	-7.09274628296587e-05
pos_192	-0.000249549374443107	-0.000401431613925339	4.98858452264109e-05
pos_1920	-3.50971473954381e-05	0.000154937677587225	0.00022567109356586
pos_1921	0.000122555932335755	-0.000237630417852177	-2.21558236045692e-05
pos_1922	0.00011380939801616	9.58004182072893e-06	0.000217220469924206
pos_1923	0.00764105159067136	0.0262378542758362	-0.00661371415001753
pos_1924	-3.52566891116113e-05	-0.000341998097273651	1.54547363751813e-05
pos_1926	-0.00450106914729279	-0.00309914883681262	0.00683849890749522
pos_1927	-0.0442694985440119	0.085146765728115	0.103551804508304
pos_1928	-0.0019462418273963	-0.00523735394858019	-0.00501106635202913
pos_1929	0.000157227842487833	-0.000950746884832206	0.00132577671349763
pos_193	-1.77571199236213e-05	-0.000135746799598137	2.55446038436158e-05
pos_1930	0.000158987597658083	0.00102563331924567	-1.13632080190676e-05
pos_1931	-1.52676459014646e-05	-9.6945579231776e-05	-5.48253846646729e-06
pos_1934	0.000299788975606575	-0.00230660906423196	0.00236003445046519
pos_1936	-0.000584744899137913	-0.0033439813355891	0.00479617161209296
pos_1937	-3.09482947932012e-05	1.43704265110128e-05	3.05116658391474e-05
pos_194	-0.00027132383790937	0.000395740812107374	0.00113752869068175
pos_1940	-0.000365227659710303	-0.000340843361132478	9.61871255043118e-05
pos_1941	3.34484437964248e-05	0.000160608912180245	-4.38624460337136e-05
pos_1943	0.000359811921774098	4.35279949850804e-05	0.000485721150869509
pos_1944	7.84980251784815e-05	0.000136406122349182	-5.22032406801913e-05
pos_1946	1.44001121325275e-05	-9.31618581101885e-05	-0.000484777234604342
pos_1947	-0.0036059216552637	0.000236246102753603	0.000275073888458499
pos_1949	-0.000137255617220777	-0.000248740147253577	-0.000265184751429244
pos_195	0.000195171166939632	-0.00142669506030519	0.000448520146223299
pos_1950	-4.5698669767412e-05	5.18814935409907e-06	9.21376259822425e-05
pos_1952	0.000586984014337326	0.00326799632628567	-0.000137100940010097
pos_1953	0.00130080865163681	0.00687562825755682	-0.00121035608662025
pos_1955	-4.49191335828175e-05	-5.6617380323981e-05	-0.000408228862206182
pos_1956	7.71840145821694e-05	0.000163277445443776	9.6111545023424e-05
pos_1957	-0.000514134884290194	-0.000412938292269717	7.63643021556595e-05
pos_1958	6.85660075860847e-05	4.89187927355345e-05	0.000358948232759691
pos_1959	-2.20254937659325e-05	-6.37276128923282e-05	6.40381755668535e-05
pos_196	-0.000406824844482127	-0.0016389895887389	0.00167133009873375
pos_1960	-0.0025334620632252	-0.0194517776164076	0.00510457060285444
pos_1961	-1.0102064160602e-05	-7.51738596492797e-05	-7.00450071440422e-05
pos_1963	-0.000578057246901911	-9.34972662764541e-05	0.000715580922654951
pos_1964	0.000638549294021929	-0.000752515850507446	0.000747181780768115
pos_1965	0.000238400651122102	0.000813780606094432	0.000147056287375578
pos_1966	0.000127791342702422	-0.00021456917938772	0.00307172336153857
pos_1967	3.76155541528872e-06	0.000101334629573699	-0.000210672109068046
pos_1968	0.000925501536051546	0.00468155071049494	-0.000988884646153979
pos_1969	0.00128147579061284	-0.000725066240941193	0.00168554524409626
pos_197	0.00185081940326687	-0.00563181129753379	-0.00953591888658023
pos_1970	0.000274893170326459	-0.000191536191025584	0.000107560303358121
pos_1971	8.57132994912026e-05	-0.000366622622253221	0.000417183210743758
pos_1972	0.000879768232449212	-0.00371071026911551	0.00395054833928875
pos_1973	-0.00330279441832374	-0.0026253027735404	0.0149904014778463
pos_1975	-6.67454078166818e-05	-5.03190612424936e-05	8.88416468812517e-05
pos_1977	0.000650414264859005	-0.00255707648574878	0.00248809605711723
pos_1978	0.00603257059480041	0.00190882122502887	-0.00992451179433876
pos_1979	-0.00253468711644958	0.000240595792720518	0.00346743172534715
pos_198	0.00109478690812124	-0.00223417689312529	-0.0016093863146039
pos_1980	2.30598234172791e-05	-3.09393093921056e-05	0.000177418258978068
pos_1981	-1.6697087066686e-05	-0.000246074467507978	1.48167643656801e-05
pos_1982	0.000140216693814038	0.000388809257236212	-0.000105205475419093
pos_1983	8.78862779618289e-05	-1.4911102028898e-05	-0.000142705809689942
pos_1984	0.00316923038824617	-0.0125193397653964	-0.0741452365563073
pos_1985	0.000185293839684923	-0.00110760000645544	0.000638214055339927
pos_1986	0.00086881391275602	-0.00133371502808192	-0.00271122322426703
pos_1988	-0.00322025995846197	-0.00306422260803894	-0.00326453451189681
pos_1989	2.49848358110791e-05	-0.000196937769532977	0.000142567302171342
pos_199	0.000452877046068529	-0.00153379727215316	0.000108412477207127
pos_1990	0.0012171151785546	-0.00365271227793198	-0.00173303166616383
pos_1992	-5.42023706404713e-05	-0.00181577394785838	-0.005057792958097
pos_1993	0.00321627878844558	-9.67324817433003e-05	0.0282016929739293
pos_1997	-0.00107840049640601	0.000702530889480633	-0.000996670663496869
pos_1998	0.00132107065491963	0.00152423295892743	-0.00283745242327418
pos_1999	-3.84522618695496e-05	-8.34386049324566e-05	-0.000228267190857558
pos_2	0.0012617081661178	0.00433059511404898	-0.00253470873028985
pos_20	0.000166953241273677	0.000153730341092734	6.9895804202573e-05
pos_200	-1.15011722378882e-06	-0.000306705098069439	0.000144909848455051
pos_2000	0.000523343181541016	0.00246205523074707	-0.000369941054566583
pos_2002	-6.89915960258563e-05	-8.70475202585752e-05	7.20587567359575e-05
pos_2003	0.00191856568475767	-0.00134327596126549	0.000670044342248587
pos_2004	-0.000273235724045469	-0.000579492130632488	0.000338604626384417
pos_2005	6.29506786155157e-05	0.000188393453162476	-0.000151408457548459
pos_2006	0.000357000114810911	0.00169474531947517	-0.000267046374618457
pos_2008	0.00034641543243457	-0.00163584137446627	0.00201655212296751
pos_201	1.07641894970423e-05	-7.35501984473689e-06	1.5017929708799e-06
pos_2010	0.00137035801401814	0.00314471806813395	0.000339194525118817
pos_2012	7.16751881478878e-05	-0.000161057556418845	0.000137773716476048
pos_2013	3.7731350583781e-05	-2.24428308863833e-05	3.87250750120503e-05
pos_2014	0.00107315423588028	0.00129169302446917	0.000652972502767718
pos_2015	0.000445627360636767	0.000276473528914297	0.00065259540792437
pos_2019	-4.34909312546083e-05	6.24060907969572e-05	-8.33646816981265e-05
pos_202	0.00866266438661941	0.0270828858179421	0.00490904988893505
pos_2020	3.54490985370633e-05	-5.01049897849144e-05	-0.000100523840612002
pos_2021	2.7447486857146e-05	-0.000277379211774843	0.000161933117815164
pos_2022	-0.00824691954843631	-0.00899142178103499	0.00992271068536161
pos_2023	-7.35956185458995e-05	-0.000412635697730482	0.000215796893001948
pos_2025	7.02809646673984e-05	-0.000186551378675082	-0.00040626816866993
pos_2026	-1.18393773434521e-08	-0.000535156354831001	5.77865797841573e-05
pos_2027	-1.1303032876995e-05	-3.89554313366474e-05	-0.000252752325494447
pos_2028	5.05136014004273e-05	0.000761713585281408	-4.8257389421303e-05
pos_2029	-0.000135536592398645	4.59191207143076e-05	-0.00017622003705377
pos_203	0.00138299766179088	0.000567406939197327	-0.00580618709111637
pos_2030	3.20201914072735e-05	7.46565989599342e-05	-1.08405695453725e-05
pos_2031	0.000655681613152785	5.52163665354938e-05	0.000920877358732436
pos_2033	0.00244570963287368	-0.000131771659554802	-0.0159603977069945
pos_2034	1.94286554644401e-05	-0.000252514622330058	2.4586086505456e-05
pos_2035	0.000150752154597163	0.000151013909300226	0.000222412551391835
pos_2037	0.000165100099160262	0.000318817119443693	-0.000129545512523726
pos_2039	7.51081350349331e-05	-0.000595665653336745	0.000447890225819094
pos_204	-1.67275509087936e-05	-6.12551912865663e-05	1.92631193667579e-05
pos_2040	-0.000340008849690889	-0.000313723484354837	-0.000447651347600465
pos_2041	-0.000640602495263079	0.000131135224954565	-0.000472597400960485
pos_2042	0.000654283990361174	0.00359313290379038	-0.000504441819504698
pos_2043	-2.18039981451745e-05	-0.000505449057584578	0.000184868544504907
pos_2044	0.0003044076725431	-0.00053165983998278	0.000222165483324225
pos_2047	0.0015441671582228	-0.0048009784161765	-0.0011392695667109
pos_2048	0.00114350686777925	0.00298524878225901	0.00129958357032759
pos_2049	2.49417567901153e-05	-9.83257004523054e-05	0.000165852816107432
pos_205	9.68767487588148e-06	-0.000373402080628072	0.000410793110287523
pos_2050	0.000268535021895684	-4.04241491370276e-05	2.28483125104757e-05
pos_2051	-0.000495441607337054	0.000153867346265854	0.000437270695665782
pos_2053	0.00109198468847735	-0.00125637104327137	0.000562818701145647
pos_2054	-0.000152246736040722	-2.8716824780594e-05	0.000243924681855848
pos_2056	3.65248526078779e-05	-0.000165825695628776	-0.000249454375698841
pos_2057	6.16712474932661e-05	-0.000194705598130495	-0.000330897068402899
pos_2058	-0.0003821900176169	-0.000882701132169294	-0.000957960290275288
pos_2059	-0.000104005814027029	-4.25395467600271e-05	-0.000175072002219774
pos_206	9.08319022152808e-06	-9.06094935151245e-05	0.000239166853815391
pos_2060	4.11254787226393e-05	-0.00013173601726181	-0.000358882540592264
pos_2061	3.18515511944149e-05	0.000161473056721287	-8.54874954405576e-05
pos_2062	0.000833806265519874	-0.00176931636662651	-0.000164770482375756
pos_2063	0.00043761645077699	0.00129977401637566	-0.000163056442731338
pos_2064	0.00109588771691978	0.00642602110649215	-0.00134513951063883
pos_2066	7.01575082022759e-05	-0.00106149927512191	0.000712597555771222
pos_2067	0.000850683166886948	0.00368541725296248	-0.000502408490635219
pos_2068	0.00107724018497549	-0.00304571161385431	-0.000433042699448647
pos_2069	-1.13563987103023e-05	-0.000521303594821133	0.00121600444443019
pos_207	0.00459769011619474	0.00745425067992491	0.0126175966433568
pos_2072	0.000606319814400067	0.00152797270869207	1.24091058579156e-05
pos_2073	0.000523321806550997	0.00266557419674943	-0.00066713919198394
pos_2074	0.0156312611048133	0.0725918005024347	-0.0230542217325598
pos_2076	0.000237232951635355	-0.00169024910484422	0.00282799513720067
pos_2077	0.000145892418827458	-0.000459895388566066	0.00059216667443565
pos_208	0.000303255731424638	-0.00105570032343256	-0.000773987811874933
pos_2080	-2.24645996413138e-05	0.000157521967461794	-0.000146839672346859
pos_2081	5.27192408681043e-05	0.000169295585854154	7.29485872112707e-05
pos_2084	-0.000421048735375711	0.000174668115668799	3.75559058641562e-06
pos_2085	0.000453487203539499	0.00164638213166009	-0.000539979191613563
pos_2086	2.38810122617765e-07	-0.000135024197348534	0.000140813521224971
pos_2087	-1.91673130290936e-05	6.06779556764142e-05	2.24523413154257e-05
pos_2088	0.0228645511138064	0.1031644305753	-0.032712131410637
pos_209	-4.91809446210497e-05	0.000479931400986374	0.000362925149535286
pos_2093	-0.00230511723117459	-0.0145146337949462	0.00697800428650933
pos_2096	-6.58022268721576e-06	-6.00921145161929e-05	1.64572726605443e-05
pos_2097	0.000215162904923079	0.000790184851212005	7.03680461106185e-06
pos_2098	-1.29838756499212e-05	-0.000347013660434557	0.000201388041530306
pos_2099	-0.00013748537055525	0.000527834304250329	0.000167068897682672
pos_21	0.00381569922378522	0.0121309056775576	-0.000130466954570083
pos_210	0.000104568351328044	-0.000540004660548324	0.000540140135670504
pos_2104	0.00202065438583876	0.0062371223546796	0.00165668020738012
pos_2105	-2.01812972491135e-05	-4.16197315890156e-05	2.9519380354066e-05
pos_2107	-1.28101263571983e-05	-5.21848225652277e-05	-9.82056916239535e-07
pos_2108	6.9942940825123e-06	-0.000128594829234818	6.94640012404525e-05
pos_2109	0.000456646148850433	0.000200068547430574	-0.00023987721556664
pos_211	0.000460274484687671	0.00165643369217391	0.00138830697989004
pos_2112	1.54502291820298e-05	0.000211355879020872	0.000127652165068089
pos_2113	-5.90993410429077e-06	-0.000368844437488057	0.000235038421251521
pos_2116	-4.60219213405155e-05	-7.40983697415736e-05	-0.000167041160028417
pos_2117	-0.000547903721386571	-0.00076374946429249	0.00139807557287782
pos_2118	0.000864415413930401	0.000269403870064682	0.00239012705344197
pos_2119	-0.000753769862752919	0.00078762296288344	0.000394874716721139
pos_212	-7.43391877659834e-05	-0.000225438753146995	-0.000306099718363822
pos_2120	3.62530921913298e-05	-6.32248433827756e-05	4.17230743324035e-05
pos_2122	0.000273754006848206	-0.000642613820803439	-0.00116735058064157
pos_2124	0.000258372028423462	0.000929010879910962	-0.000355283076902614
pos_2126	-4.16725107834426e-05	1.72734577355676e-05	0.000213702833055077
pos_2127	-0.000578948452282549	0.000135427197855124	0.00472525462854682
pos_2128	2.75346123119162e-05	-0.000215615233142307	1.43632647038167e-05
pos_2129	0.000495376410689994	0.000106091902167745	-0.000465380183787806
pos_213	3.5585663824645e-05	-0.000170463248092001	-1.52347794894175e-05
pos_2130	-0.000273869094769561	-6.38553682561457e-05	-0.000137260332742744
pos_2131	1.30386363951346e-05	-0.000313665311916337	0.000493411511702524
pos_2132	-0.000150645882506908	-0.000441802467592563	0.000845924686407158
pos_2134	0.000120952318507056	0.000143659734001042	0.000147342288651429
pos_2135	6.21033204793253e-05	-6.29426937365546e-05	6.58832916223884e-05
pos_2136	0.0040157329834882	0.00806833288592519	0.00340313919553629
pos_2137	2.43387853691395e-05	-0.000138940278387977	-5.71183948240719e-05
pos_2138	-0.000171235220168057	-0.00152818768484131	0.00316670629814836
pos_2139	6.44505186116825e-05	0.000102766052568948	8.78661174764473e-05
pos_214	-3.60257213769839e-05	-0.000419815282996931	0.00243298595731128
pos_2140	0.0181603459555202	0.0699429832478035	-0.000660500638089085
pos_2141	8.3057146982202e-05	-0.000644528659742588	0.000820955625522639
pos_2142	0.00341760966242007	0.00381677235819319	0.014285467066921
pos_2143	-8.77119331983919e-07	-8.65440365277839e-05	0.000202074739906499
pos_2147	8.54674726065498e-05	-0.000277630981699566	0.000431923848518851
pos_2149	0.000137369027831917	-0.000389339031737174	-0.000336922351946535
pos_215	0.000134370925986787	-0.00433595665564139	0.00161700593151202
pos_2150	2.06085752218385e-05	0.00010671290923753	5.63827033665781e-06
pos_2151	8.21172866530149e-05	-3.74452051824218e-06	0.000186236540530315
pos_2152	9.69777890362901e-05	9.38295819954609e-05	0.000266986482058905
pos_2154	-0.000156205113817007	-9.2455937472318e-05	0.000148231713927834
pos_2155	-4.79837198201705e-06	3.5276307475203e-05	-3.02542214986576e-05
pos_2157	-3.90846019951953e-06	-2.97230635896687e-06	2.87467119331758e-05
pos_2158	0.000247921940540362	-0.000917493439767964	-0.0027963275975157
pos_2159	-2.18756083453554e-05	-0.000140963284820709	0.00085108224696524
pos_216	0.000204566563157519	-0.00163913461311554	-0.000192241382184291
pos_2162	1.64376815191714e-06	9.540307533018e-05	-0.000824809887854262
pos_2163	-9.42126076463955e-05	-0.000965440238193694	0.00017472635561264
pos_2164	0.00012711351920174	-0.000418375401235178	-0.000224175870412404
pos_2165	-5.93862761769645e-05	-0.000896410110860695	-0.00117049645523867
pos_2166	0.000186165948586939	-0.000188454620487748	6.58905137320693e-05
pos_2167	-1.86134400149636e-05	-8.17087790593428e-05	0.000111063506202134
pos_2168	0.000162462868088061	0.000308384832174153	0.000132609241203765
pos_2169	0.000607082764329319	-0.00571240884966628	0.00755769740940185
pos_217	2.41585280795578e-06	-4.01562691786017e-05	3.60604958225849e-05
pos_2172	7.91050946043019e-05	0.000265442614559929	0.000228326427112882
pos_2173	0.00245060433454685	0.00976765203003105	-0.00326412176787116
pos_2174	-1.77759508402917e-05	-0.000264931650943243	0.000328324765195182
pos_2175	-0.000295349829560925	0.000157129845315175	-1.07635796530185e-05
pos_2176	-0.0120071882173438	-0.00617697332097805	-0.00154212396686748
pos_2177	0.00663392714350831	-0.0267852906740997	0.0262506507855981
pos_2179	2.92730646565851e-06	-0.000166422321099755	0.000147487365727186
pos_218	-0.000200469869359449	-0.00056878645078707	-0.000185819553301937
pos_2180	-0.000810413980571015	-0.000483050283432678	-0.000282183492682141
pos_2181	-5.98264226502308e-05	7.36968090749721e-06	-2.52240375222454e-06
pos_2182	0.000420881668197315	-0.000421775344462025	0.000311242123448499
pos_2183	-2.3749164742968e-05	0.000142686655418544	-0.000568795900466296
pos_2184	-1.04646884248193e-05	-0.000233493905107039	0.000386553404147926
pos_2185	4.36753365057262e-05	-0.000107152802390427	0.000500392428343495
pos_2186	0.00152568857769831	0.0048784416717104	0.00029539057364907
pos_2187	-3.54765562632439e-05	7.41807559732568e-06	-3.57084585842517e-05
pos_2189	0.00734840056559075	-0.038846932476422	0.0459836593772237
pos_219	-2.67746980571987e-05	0.000466888715172765	0.000946088423892707
pos_2190	-1.68561953205039e-06	-5.2242054601575e-05	4.12524318920669e-06
pos_2191	0.00208085880820103	0.00440523950583148	0.00375956760633882
pos_2192	0.000642647278814171	0.00142671915616418	0.00171395719581292
pos_2194	-0.00401184733647637	-0.00227118935385185	-0.00177792552123756
pos_2195	4.17693559412646e-05	0.000157414414084804	6.81187942882198e-05
pos_2196	-2.77895336685599e-05	-0.000125705218867999	-0.000129867998603873
pos_2199	4.92001305408944e-05	0.000196460958787338	4.51645185370902e-05
pos_22	-0.0188039125365679	-0.00353654116210794	-0.0588966900137576
pos_220	-0.000618891170396445	0.00053947073905305	0.00379556424764662
pos_2201	9.26648220013526e-05	-6.0504441436174e-05	0.00032030530715954
pos_2202	-7.80946874557324e-06	-2.07802082368667e-05	-5.61414960475783e-05
pos_2203	0.000128318429217927	-0.000814218957166788	0.000455805261696148
pos_2204	-8.82810969509219e-05	-0.00010819499149825	0.000121102593838701
pos_2205	0.000158823821088719	-0.000710370018875895	0.00175675579151428
pos_2206	-0.00258197497976257	-0.0498308720873322	0.0222515653844955
pos_2207	2.17949201781132e-05	0.000109787024765756	0.000174935863137007
pos_221	-0.00016470970065199	-4.42852213838546e-05	-5.94571726485281e-05
pos_2212	2.90451223521082e-05	0.0001156482744259	-0.000117007919644139
pos_2214	-0.000161409864728891	-0.000152900232000532	-0.000309370886498508
pos_2216	-0.000770960413955453	0.000236944814979698	0.000656791794925044
pos_2217	0.000243395790827309	0.000150789160564922	0.000822619777167659
pos_2218	4.69454171942927e-05	0.000224887188240865	0.000243871161859009
pos_2219	0.00110674914361453	0.00508788316756163	-0.00148668368985891
pos_222	-2.54827582643723e-05	-3.41142525849067e-05	-0.000110155769606235
pos_2221	0.000415864286748947	-0.000396912085145204	-0.0013720992272887
pos_2222	0.000540631385537195	-0.00205577355251843	0.00220612271127176
pos_2224	0.000642174740645852	-0.000326080117679567	-0.00103257378929299
pos_2225	0.000912569959323627	0.00336755801186953	0.000858732391186684
pos_2226	0.000279983729886804	-0.00062929524175759	-0.00322927723250954
pos_2227	0.000148920690949246	-0.00016623175093707	1.45990018837331e-05
pos_2228	-1.8863235166149e-05	-0.000162059395594035	0.000119715163951775
pos_2229	1.26677871680549e-05	-2.07015554203434e-05	-3.38287862020121e-05
pos_223	0.000422111644524641	0.00282189202488004	-0.000433868021614239
pos_2230	0.00381911599946417	-0.00263207294995724	-0.015844419736478
pos_2231	-4.77844614880943e-05	-1.55292565924053e-05	-6.9623666261527e-05
pos_2232	0.000495013116938287	6.89697946213533e-05	0.000576655816761848
pos_2233	0.000260667991200433	-0.00304007013500422	-0.0096865889678754
pos_2234	5.03344190973238e-05	8.48331419564446e-05	-0.000106294285934156
pos_2235	0.000103248095363042	-0.0001315962280085	0.000117990527124548
pos_2236	0.0014599282887086	0.00726815943343975	-0.000944465128351331
pos_2237	9.51693952229044e-05	3.72626909233018e-05	0.000142244086781079
pos_2239	-6.36505384827602e-05	-0.00043668736629759	-0.000181755965668209
pos_224	0.00283805724979414	-0.0107245075594035	-0.0683748894135115
pos_2240	7.25335176055675e-05	-2.93966472899588e-05	0.000136411622934144
pos_2241	0.000102218027542643	0.000181834703303519	8.89998747960808e-05
pos_2244	0.000135240709751196	-5.48046808096066e-05	-0.000211862494634516
pos_2245	0.00031913664497385	0.000272308105236057	0.000281128976734964
pos_2246	9.51827412597707e-07	-0.000102322049980863	9.29355092915392e-05
pos_2247	0.000412952271375715	0.000772690269637859	0.000496419220330627
pos_2248	-0.000147356409166858	1.61564454284108e-05	0.000297796743088903
pos_225	-0.000317278707152776	0.000658336112007894	0.00277147457092856
pos_2250	3.98854412514988e-05	0.00021231477961409	-1.68367102505971e-05
pos_2252	0.000166483856380738	-0.000801612431237329	0.00102639670145575
pos_2255	-9.02854837520314e-05	2.03400363942161e-05	-3.33932163423277e-06
pos_2257	1.17160353089313e-05	-0.00158802488394062	-0.00122158230187232
pos_2258	0.000220577066097345	-1.27083237994409e-05	-0.000294094204245528
pos_2259	1.56444687572419e-06	0.000113246573409489	1.83460538927327e-05
pos_226	-0.00196303142102453	0.0375801688717194	-0.0116026582891863
pos_2261	8.9818032115189e-05	-0.000200142670074739	0.000373138091072429
pos_2262	-7.93633934944806e-06	-1.5984660615135e-05	3.06652879161948e-05
pos_2263	-0.00129457536430237	-1.0445898433304e-05	0.00865572735435581
pos_2264	5.11523779673881e-05	0.000133926663330875	6.2822925100971e-05
pos_2265	0.000977886547582622	0.00521480722625399	-0.000612490791141467
pos_2266	0.000321238282507345	0.00151241365068449	-0.000207366569730459
pos_2268	0.00181287493075189	0.00364562281544369	-0.00139858280784885
pos_227	0.000283652691802079	-0.000329032337833671	0.000718641471278802
pos_2270	0.000361153011229107	-0.00340261361575026	0.000493937471772441
pos_2272	-3.00216409367644e-05	5.42950096140165e-05	-6.54202640449407e-05
pos_2273	0.00163824805320204	0.00212008566642019	0.00193286511550878
pos_2274	0.000140319410995389	0.000300163976039682	0.000387885509579396
pos_2277	-0.000189341347985802	-0.00138484196338387	0.00081599008910712
pos_2278	0.00295309652258366	-0.00714177211243361	0.0146011864520606
pos_2279	-6.59685560812231e-05	-0.000152823014974284	0.000472680917738899
pos_228	-0.000260552360638324	6.13872861707348e-05	0.000148093723052033
pos_2280	0.000134941005010033	-0.000330007388107488	-0.00055421751042911
pos_2281	0.00159231066501517	0.00871110539260297	-0.0010928418316569
pos_2282	9.18146935257133e-05	-0.000251991903177753	0.000260631263786215
pos_2283	8.29173322786831e-05	0.000219005674645117	-1.20241772422456e-05
pos_2285	0.000216849387943106	0.000622829284313695	-0.000236662344133076
pos_2286	-4.06315646174718e-05	-0.000245221634671992	0.000191298484093556
pos_2288	0.00213116450318947	0.00738152467714405	-0.00029466731684086
pos_229	-6.23826924894527e-05	-0.00014158164929202	8.3661677476759e-06
pos_2292	0.00297119401114181	-0.00166596672925353	-0.0168296855408077
pos_2293	-0.000111923725604511	-4.06352048197636e-05	0.000292407950748842
pos_2296	0.000142219686017729	0.000134016399495879	0.000125884605380627
pos_2297	0.000798851628442741	0.00328723992001545	-0.000426022938684729
pos_2298	-0.000757856468840255	0.000919705060447402	0.00311863498173821
pos_2299	-3.0412629752366e-05	-0.000376651292215301	0.000347039908807545
pos_23	-0.0034140644108801	-0.00709945379590137	-0.000304369233623751
pos_230	4.36863038000252e-05	-0.000820113398964864	0.00108316159287501
pos_2300	4.56057340220655e-05	0.000127373371443981	-1.34483147276403e-05
pos_2301	0.00214783200279887	0.0119111376078347	-0.00179538809387561
pos_2302	0.00353585349829216	-0.0115558338509898	0.00498116475049116
pos_2305	-0.000140018682826041	-0.00107501038306835	-0.000150170042230472
pos_2307	5.65686721863628e-05	5.28241830018841e-05	0.000191138064028337
pos_2308	6.4980516605751e-07	-4.87580510967404e-05	6.36054791124455e-05
pos_231	-0.00124616104039924	0.000405656769147909	0.00790929567900535
pos_2310	-3.90464860174353e-05	3.93891761709916e-05	-6.32181261965835e-06
pos_2311	0.00131607631892052	0.00643925912488908	-0.00132135508751348
pos_2313	-0.000221173158412702	-0.000690519589471054	0.0009006116435893
pos_2314	0.00482332847702533	0.0156787339408324	-0.00326195627670746
pos_2316	0.00100651854512282	-0.00246342183293574	-0.00188027107917546
pos_2317	-6.91802198759428e-05	-0.000640567477943305	0.000801877075395763
pos_2318	-0.00322297909686407	0.00168185333748164	0.00258759280213437
pos_232	-0.00034045416148925	-0.00116765289151109	0.000442507295306575
pos_2320	0.00140656095707978	0.00165500126969597	0.0023636728781882
pos_2321	-1.87782603421623e-05	-0.000301794443716049	0.000219868571028995
pos_2322	0.000141613320859684	-0.000583292043970793	0.000932177235503741
pos_2323	0.000221815726905523	0.000783715774788817	-0.000158565063716
pos_2326	0.000176781047712713	0.00276199237771657	0.00235328980274372
pos_2327	0.000654954381976307	-0.0013161851547624	-0.00721102331902914
pos_2328	2.87079554765616e-05	0.000116309979583736	-7.73110265900261e-05
pos_2329	0.000274880819816404	0.000501654268469079	0.00055708932747772
pos_233	0.000167076305221771	-0.00110765266631334	0.00119155900619897
pos_2330	0.000526850744804858	0.00298793175336073	-0.00053323443717848
pos_2332	0.000110704773479868	-0.000216473194981955	-0.000439140477730225
pos_2334	0.000313118377097128	-0.000185228427730728	0.000246452781354933
pos_2337	7.30696333258159e-05	-0.000806500342049041	0.0017066719016977
pos_2338	-0.000845664482247087	0.000119381126735146	0.000320257747248979
pos_2339	-3.49763096102088e-05	-0.000234121988354094	-0.000307251899956483
pos_234	0.000567537250991875	-0.00130467492241087	0.000512641560615944
pos_2340	0.000203684083569034	0.000249560025552232	2.92935198478785e-05
pos_2341	-0.00342420705214165	-0.0109390849601394	0.0110902627051045
pos_2342	5.47039974126759e-05	0.000277230057967973	-0.000463356380698722
pos_2345	8.04227210241828e-05	-0.000125223500667385	0.000130025652964916
pos_2348	2.08854895825864e-05	-0.000352926706061303	2.64605516918971e-05
pos_2349	-0.000996748393676603	0.000403124955188374	0.000563016542833455
pos_235	0.000731176800604975	-0.00380441003293276	0.0020818374873429
pos_2351	0.00141669059508266	0.0079179141057859	-0.000932552503322857
pos_2352	-0.000903249833671528	0.000446515365667176	-2.15807903510989e-05
pos_2353	0.000219178899767965	-0.000287660216725352	0.000387856837873679
pos_2354	-4.58004059470855e-05	-0.000256883177285756	0.000232636261111541
pos_2356	0.000208280061723792	0.00101994041562669	9.47522939263905e-06
pos_2358	0.000296992960394378	0.00126699369788688	-0.000170592792675943
pos_2360	1.04750986301215e-05	-0.000117040401374822	0.000172292517731111
pos_2361	6.64789583364033e-05	-0.000362320800291248	-0.000127657016345705
pos_2362	1.42254888847701e-05	7.52292876671829e-05	-5.83587840428804e-05
pos_2363	0.00021693462769228	-0.00207280649127959	0.000816953146890263
pos_2364	0.00168229581894879	-0.000716780218068984	0.00277918667514923
pos_2365	-0.013416570533857	-0.0119045280901398	-0.0751652436489345
pos_2366	0.000202455713500781	-0.000372513345486076	0.000336328798991183
pos_2367	0.00470079012057598	0.0140132935059458	0.002089443438577
pos_2368	0.00104129516693379	0.00599528975435641	-0.00125327563095763
pos_2369	0.00214845839947767	0.011030184892364	-0.00161116682532054
pos_2370	-0.00010605630558075	-0.00123850086941948	0.00145034746628089
pos_2372	4.41725286886738e-05	-0.000442290207827414	1.87602931934808e-05
pos_2373	-0.000726709037180784	-0.000961318915675477	-0.00428152176803886
pos_2375	0.000218247672713807	-8.68444578386666e-05	0.000114283142266169
pos_2376	0.00028186136093632	-0.000266249749532589	0.000577646320654879
pos_2377	-5.39670010793712e-05	-0.000316488164640996	-0.000252511926111417
pos_2378	0.0234726379388489	0.0852461627379967	-0.00139111943625505
pos_2379	-0.000110903964515525	-0.00052709732332146	0.000466152351003726
pos_238	-0.000336617952883307	-0.000860202764850171	-0.000721098522087142
pos_2380	-0.00266290794942508	-0.00569726887770107	-0.00340535145879595
pos_2382	-4.20966874180927e-06	0.000939878345363776	0.00015066853190872
pos_2383	0.00571308592671729	0.0146142425111826	0.00285054462582851
pos_2384	-0.000103803469234958	-0.000356084171581545	0.000583185372575859
pos_2385	0.000598833404013801	-0.000388616517164516	0.000672748231004801
pos_2387	2.4610836940325e-05	2.02117506772876e-05	8.78357502613004e-06
pos_2388	0.000152249421243744	-0.000664837768439846	-0.00238062678559322
pos_2389	-0.000325023262852751	0.000369000726675227	0.00202042324644748
pos_239	-0.0303474557464064	0.00067083398106624	-0.00775180859074117
pos_2392	0.00333279817328488	-0.00334908475806702	0.000515423817917547
pos_2394	0.000105111234486943	0.000625541937702876	0.00025444835597432
pos_2395	-8.53653539216268e-05	3.64772352183165e-05	0.000125778919578484
pos_2396	-7.7874291406504e-05	-0.000170504814324639	0.000258347121426848
pos_2397	0.00110440760450796	0.00421354731367549	-0.000913085946776678
pos_2398	0.00176021964816338	0.00812540661891431	-0.00251168189378398
pos_24	-3.82568000965945e-06	-0.000332581729290048	-0.000213226926048939
pos_240	5.87198795780237e-05	0.000193465203439183	3.09964560212394e-06
pos_2405	0.00149545169259478	0.00796233237024807	-0.000928014034221253
pos_2406	0.00044688602327606	0.0012928590996741	-1.99623219101024e-05
pos_2407	5.2278030310384e-05	-3.56673596394053e-05	-0.000234729416189248
pos_2409	1.66790777276385e-05	7.14533129048898e-05	-0.000113907521283646
pos_241	-0.000839589111375991	4.62682094758502e-06	-0.000645855260898098
pos_2410	7.73933956610944e-05	-0.000633984565116286	0.000451383350377664
pos_2411	7.47359758106012e-05	-0.000272497280392121	7.98130597564934e-05
pos_2412	0.000295675256421956	0.001888863036682	-0.00033825294677136
pos_2413	5.13752835516124e-06	-1.30515216501011e-05	3.77829002671722e-06
pos_2414	1.43180408307241e-05	-9.12229513749075e-05	8.35602957596017e-05
pos_2415	3.94424675360089e-05	6.94864157535633e-05	7.05144787206834e-07
pos_2416	2.16844455805689e-05	0.000159654201096378	-5.63839184259083e-05
pos_2417	0.00553536152110472	0.0154229630030116	0.0025864904863817
pos_2419	0.00345727776691882	-0.00977783437569581	0.00118551167520834
pos_242	0.000408470798936267	-0.00115389728141295	0.00143114306362801
pos_2420	0.000154073616760664	-0.000384900954982243	-0.00213287407077753
pos_2422	9.67243321566953e-05	0.000219723935358165	2.20672822072282e-05
pos_2423	0.000538136309587058	-0.00337672189833307	-0.00063725751991472
pos_2424	0.0006440755363714	0.00146395738764163	0.00170570846853311
pos_2425	-1.46472829032753e-06	8.10500046615887e-06	6.95233766605999e-06
pos_2426	0.00112990468322641	0.0016071460594256	0.00101342406071303
pos_2427	-8.52179902925016e-05	0.000189819968944577	-0.000475150229498248
pos_2428	-8.04421761164837e-07	0.000456590722974774	0.00430614885256131
pos_2429	0.000333455263584857	0.000628809332157023	-0.000670474043859136
pos_243	-0.00435129097153584	-0.0043605726018261	0.000293645301876917
pos_2430	0.0033860450628245	0.00514229184162345	0.00574924969373175
pos_2431	-0.000489746673309714	-0.000282267087359288	0.000523533053307129
pos_2432	0.0014009757884872	0.00642060134925205	-0.00208126165882395
pos_2433	2.49389016736105e-06	-6.29566686938469e-05	4.97845095974478e-05
pos_2434	2.14059028749179e-05	-0.000446957674387258	0.000708676155337701
pos_2435	1.44669786571391e-05	-0.000110962796478254	3.88997675349463e-05
pos_2436	9.41782055291107e-05	-0.000219907876959132	0.000215370836474559
pos_2437	0.00387520683836238	0.0146138192532607	-0.00552230141204263
pos_2438	0.00216173562429805	-0.0277372022931834	0.02525196434713
pos_2439	5.67307712569427e-05	-0.000381391449777902	0.00074677823671519
pos_2443	0.000183680786463335	0.000448218348914325	-0.000405324258764448
pos_2444	0.000876916500701955	0.00125958776266229	0.00301334154123677
pos_2445	0.000163375283571555	-6.28911842175813e-05	-4.66743711115093e-05
pos_2447	5.91420101269756e-05	-2.59712165718693e-05	-0.000793434225102734
pos_2448	-1.97330018074487e-05	-8.93872204043126e-05	-7.30116844127749e-05
pos_245	-0.0104137995181492	-0.00627455485148657	-0.0171967147163763
pos_2450	0.000398216496834219	-0.00171984249874943	-0.000507532504059084
pos_2451	8.70620129308284e-05	0.000215921989493665	0.000173884637110814
pos_2452	0.000366735720353808	0.00141119910649999	0.000531544379574535
pos_2454	0.00341083622104481	-0.00249030668347142	-0.00156194576363929
pos_2455	0.000968724011013309	0.00288370584952663	-0.000699397352931645
pos_2458	-0.000102568373880841	-0.000251740933431255	-0.000149985949049941
pos_2459	0.00122879997396087	0.00383936282126706	0.000555309951339416
pos_246	0.000786328874983992	0.00495792433009104	0.00754346863316023
pos_2461	0.000386789892139666	0.000656465388341963	0.000241160970787692
pos_2463	7.89892971800856e-06	-0.000123942855076711	7.30324377996482e-05
pos_2464	0.00099150400429305	-0.0014039999629217	0.00377312369734476
pos_2465	0.000188801944183822	-0.000517057139690247	0.000510208745996342
pos_2466	-0.000139460277028592	-6.25439577353652e-05	-0.00044884036873682
pos_2469	0.000804129258891844	0.00406146041415868	-0.000739655790795602
pos_247	-0.0023373236108321	-0.00308363167253993	-0.0127771759077989
pos_2470	1.86841568698493e-05	6.05104862055723e-05	-1.60949449145894e-05
pos_2473	0.000575982933685293	-0.00142788434108285	0.00215684425934634
pos_2474	-0.000282978566625978	1.77148394867085e-05	-0.000114037183370281
pos_2477	0.000593938177214439	0.00292538430818522	-0.000561776699448987
pos_2478	8.76560320996205e-05	0.00063514318442816	-8.74093843689586e-05
pos_2479	-1.1471803752099e-05	-5.82787338438362e-05	-1.94261691634624e-05
pos_248	0.0111088569848864	-0.146114729362902	0.0429697590635919
pos_2480	0.000147973119706562	0.000376564742499745	0.000101752600272423
pos_2481	0.000162607954276554	-0.000135818288809952	-0.000421152043353683
pos_2482	5.90344519003799e-06	-3.37715336344034e-05	-2.05818386413228e-05
pos_2483	0.000185612753769036	-0.0012978481547343	0.000369679002324748
pos_2484	-0.000830467447380206	-0.00010494304675158	0.000969252521603748
pos_2485	0.000161300517785505	0.000605569030700229	-0.000345695432989938
pos_2487	-0.000385444843991422	0.000291422742449872	-1.80961151991469e-05
pos_2489	-0.000506228180195182	3.70748194175863e-06	0.00214223190620701
pos_249	0.000524569544420046	0.00172114402284407	-8.30586109119008e-05
pos_2491	0.000201831295708866	0.000284243880935115	0.0001986806407916
pos_2492	-7.89839604564794e-07	3.43865123049486e-05	3.08412692253872e-05
pos_2493	8.8382294399696e-05	-0.000166341315830351	-0.000168096132285481
pos_2494	3.36043929969509e-05	0.000128092786290781	1.73222576942787e-05
pos_2495	-6.2983009837775e-05	-0.000244616952860603	0.000230569334175497
pos_2497	-0.00024441823408516	6.16214758804571e-06	0.000322849526669506
pos_2498	0.000401263791356674	-0.00287439364605097	0.00215250665568847
pos_2499	0.000488881001599956	-0.00193080161797009	0.00171676337131702
pos_25	0.00112285085916622	0.000186501270771455	0.00245427672904017
pos_250	0.00158089224513474	-0.00109617405340721	0.00159796122993852
pos_2506	0.00109287098916769	0.00229683099050639	0.000313954787728047
pos_2507	-3.12888356227008e-05	-0.00014231677657935	-0.000911463729862138
pos_2509	-8.913205850172e-05	-5.08076638148597e-05	9.73569448531113e-05
pos_251	0.000996437236224438	-0.00255755127417685	0.00331269869102823
pos_2510	2.91086750245031e-05	-3.71714125092084e-05	2.67549288568252e-05
pos_2511	0.0012675176030893	-0.00653182775019759	0.00621292675418516
pos_2512	0.000105769625249883	-0.00168957796167281	0.0017715499215466
pos_2513	-0.000195910326363281	8.68098919700293e-05	0.00153195549230923
pos_2514	-0.0241179806899575	-0.0586068873889993	0.0129898388541926
pos_2515	0.000191301660783949	-0.000797284853156841	-0.000885318270244877
pos_2516	0.000536248999083144	0.000775130513422613	0.000632135869612694
pos_2517	0.00149927425325781	-0.00362490087711285	0.00154692887806205
pos_2518	-0.000367692610104305	0.00023272551947765	2.11933874918057e-05
pos_2519	3.92246470451926e-05	-0.000158969200311758	6.48217148556175e-05
pos_252	0.00122056518545463	-0.00305043209266072	0.0011257953629165
pos_2520	0.000338134791351324	4.71848428087632e-05	0.000404487535865644
pos_2521	-0.000239389684119448	0.000247218144686923	0.000288021356038423
pos_2524	-2.39720408432159e-06	0.000158692309762987	0.000100589832815408
pos_2525	2.33169187572857e-05	-3.67978961831362e-05	-2.94667072402243e-05
pos_2526	-0.000272664830763768	1.75403019388021e-05	0.000728636141862536
pos_2527	8.67726569623495e-05	-0.000199662769341308	0.000428200771191199
pos_2528	0.000537466094505804	-0.000891336976187432	0.000477229427989501
pos_253	-0.000689926237921628	0.00104201057774792	0.0027695004641419
pos_2530	0.000114934090726801	-1.40422848709442e-05	5.39962192944452e-05
pos_2531	-0.000353864298201343	0.000219926233394333	0.00110735141383562
pos_2532	-1.4000325572127e-05	-0.000151791380200891	0.000426673733520562
pos_2534	0.000350541587463015	-0.00132181084782711	0.000219383989353433
pos_2535	-0.000113536557220356	0.000198524593100992	6.64254795120868e-05
pos_2536	1.78634629863103e-05	1.72805780468663e-05	3.73531960858991e-06
pos_2538	8.81988594618712e-06	-0.000299425288322618	0.000865360264799169
pos_2539	-1.53179967158433e-05	0.000308201428596604	0.000520928843473211
pos_254	-0.00100859954191802	-0.000335655453004148	0.00017462671025941
pos_2541	-8.58032190069015e-06	-0.000215841356973213	5.04449037772206e-05
pos_2542	-0.000266641093678458	1.20511670641265e-05	0.000317069028319607
pos_2543	0.00221862270396418	0.00298653527842818	0.00107680671573255
pos_2544	0.000538766211837969	0.00299987190525974	-0.000630669289078278
pos_2545	8.717732161706e-05	-0.00101276464063764	0.00038280019401211
pos_2546	0.000185067077576439	-0.000455406968628165	-1.88814121341318e-05
pos_2548	2.56435821840373e-05	-7.65646419865348e-05	0.000142653467835398
pos_2549	-0.00063490177140509	-0.0055556618546621	-0.000211526181851123
pos_255	-2.20436182839874e-05	0.000446645690613578	-0.00292617654906833
pos_2552	3.07753812200103e-05	-0.000114229208428334	-0.000236455065495598
pos_2553	0.000816544235742137	0.00183506964128282	0.00184159630281289
pos_2554	2.03419423886734e-05	-1.85390001810657e-05	-9.18256124996344e-05
pos_2555	8.11113333485035e-06	0.000140877899749364	8.45263214382268e-07
pos_2556	-0.000806486694263812	0.000366102692199798	0.00678335379997903
pos_2557	0.0537016574672477	-0.0310225082548112	0.0389524533445266
pos_2559	0.00215020757732773	0.00415507382482706	0.000137223219532069
pos_256	-1.35096048710384e-05	1.13785317254137e-05	-0.00011627995401608
pos_2560	5.58970404808455e-05	-6.73683902915942e-05	0.000193198254897524
pos_2561	0.00029669917213252	2.93286834858571e-05	0.000543450158466956
pos_2562	0.000146570601251418	0.000744235315888443	4.44755687421392e-05
pos_2563	0.000125445728986481	0.000482435314526644	5.11852429770218e-06
pos_2564	0.000136349341970243	0.00102555650891624	-0.00018645351973002
pos_2565	5.64988216399696e-05	7.56972736799357e-05	0.000313053089530309
pos_2566	8.45302857928056e-05	0.000305566208535202	-0.00011257576666824
pos_2567	1.09342513601556e-05	-0.000341353536554422	-0.000508006240071432
pos_2568	0.00128585806599539	0.0032425508007582	0.00539575440670642
pos_257	-0.000320189870651537	-0.000284974870436678	-0.000188619043762222
pos_2571	0.000938954287007009	0.00485445000057761	-0.00111284170496864
pos_2572	-6.67720350098131e-06	-5.29864636729669e-05	-0.000161801822316811
pos_2573	0.000490105229519913	-0.000746993996240357	-0.0021412657670691
pos_2575	-0.00011759997530595	-1.58229741563461e-06	-0.00025938253355267
pos_2576	-0.000180710329352399	-0.00163970408385121	-0.00134325344854333
pos_2577	5.71195296893736e-05	-0.000464766353332607	-8.64751158737649e-05
pos_2578	-8.69209669604259e-05	-2.13632095755385e-05	0.00013858002708162
pos_2579	-0.000106559891175737	-0.000104468260555485	-0.000152254057064677
pos_258	0.000127744139720843	-0.000402946682203254	0.000277821958915271
pos_2580	0.00505230342838186	0.00288040706597657	0.00623743623053401
pos_2581	9.77940618488229e-06	-4.71236585952769e-06	-3.94626095935105e-06
pos_2582	0.000103026801032685	0.000444205560353562	-9.0280825584446e-05
pos_2583	0.000127314312039701	-0.000322603357337145	0.000530260789143522
pos_2584	0.00115749292526837	-0.0011178720949316	0.000506808118334883
pos_2585	0.000743557809786874	0.00236590392666975	-0.000135827138797116
pos_2587	-0.00164518318146557	-0.00176204460508162	-0.00203843800072337
pos_2588	0.000257415443831718	-0.00178618442829638	-0.000941260015156732
pos_2589	0.000371036151194971	0.00211701490925942	-0.000150642116415501
pos_259	0.00011125275657213	-0.000254404350578655	-0.000326648258096346
pos_2590	0.000322908087918295	0.00167134083162968	-1.86420778177232e-05
pos_2591	6.10570698353169e-05	0.000393154202599176	-0.000183662927607939
pos_2592	-5.31357837783107e-05	-0.00016880684793678	-3.83144015406236e-05
pos_2593	4.2964444810927e-05	-6.08123457699278e-05	0.000137556251554683
pos_2594	0.000471729049013504	-0.000854622124492943	0.00177435669388929
pos_2595	-0.000469807372168471	-0.0148487899619921	0.010775656231665
pos_2596	-0.000116263834006272	-0.000278159214013633	-0.000190834279889225
pos_2597	0.000195199803446512	0.000671171960462819	2.96415915496568e-05
pos_2598	5.54801202594716e-05	0.000250720688161069	7.3378877055186e-05
pos_2599	-0.000105273209350017	-0.000198904858657377	0.000543334114054383
pos_26	-8.65933027092442e-05	-0.000924478493408535	-0.000348757223491316
pos_260	-7.2081073392867e-05	-0.00197424564540817	0.0026234924513787
pos_2601	2.4377489562902e-06	-0.000269422114728511	0.000214281755655383
pos_2602	1.63079547125877e-05	0.000122611082662578	-7.1283282531551e-05
pos_2603	0.000550958906662499	0.000136370224346919	0.000511490200623498
pos_2604	0.000211133557304767	-0.00042103412982123	-0.000396229864953749
pos_2605	0.000753236230150446	-0.00172323532971299	0.00227262816420124
pos_2606	-7.82760891730679e-05	-4.30537486707775e-05	-6.48224271905989e-05
pos_2607	0.00275000990624969	0.0058025211690563	0.00569819488810978
pos_2608	4.41166884674332e-05	-0.000153133003385182	0.000376328362136702
pos_2609	-6.43919857698309e-05	-0.000145860070077031	-0.000271538357373114
pos_261	0.000199545322099335	-0.00101977983674545	0.00113789689423377
pos_2611	4.5584612777698e-05	-0.00015141164759547	-5.48823987903896e-05
pos_2612	7.28669180297529e-06	-7.35075892742802e-05	0.000112709539705153
pos_2613	-0.000381610438097554	-0.010457969052844	0.00569010699582588
pos_2614	1.05728290217927e-05	9.72500317644837e-06	-2.6155246798033e-05
pos_2615	-0.00137651379363643	-0.0027633077423392	0.0019514332537562
pos_2616	0.000527842411357225	0.000845253534149241	0.000260085594204567
pos_2617	1.64860413269418e-05	-0.000250931955649918	0.000413925218064084
pos_2618	-0.000208077337644598	0.000252490449382504	0.00242333560852602
pos_262	-3.32816266168947e-05	-6.43599998433964e-05	0.000238655540538077
pos_2622	0.00159111298548848	0.00140849243899455	0.00612143108770053
pos_2623	-0.000151944259351689	-0.000301740943145062	0.000551372997289968
pos_2624	1.39414330087527e-05	-0.00022889475281378	-0.000515875955876102
pos_2625	0.000136355739866933	0.000161658247317493	0.000365841370086361
pos_2626	-0.000182933852187179	-0.00050870521109094	-0.00039842636090384
pos_2628	-0.00414711786847122	-0.0129244749021525	-0.00264889293147939
pos_2629	0.000197710696688922	-0.000427492317445797	-0.00094766250716724
pos_2630	1.24779709408415e-05	-4.81296343932444e-05	8.16765902669766e-05
pos_2631	0.000103311899235335	-0.000300166425275163	-0.000353129138028597
pos_2632	0.00108326811481163	0.00378330664354313	0.0052278653296218
pos_2634	-0.000399485045966513	0.000221463760329809	0.0023197494610972
pos_2635	-0.00117157962506943	-0.00350200571279101	0.00329144153102265
pos_2637	0.00144580876709185	0.00730946990984498	-0.00124977962875503
pos_2638	-0.000417221872227958	-0.000457559153088757	-0.0027946108496201
pos_2639	-4.42174724359463e-05	-0.000339124788174635	0.000130392977201164
pos_264	0.000933013894280217	-0.0019692209062844	-0.000888349362985886
pos_2640	-0.000513572267370533	0.000193250434508781	0.00109167335243467
pos_2641	-0.000339708264466715	-0.000516476264888159	1.85547367827678e-05
pos_2645	-9.20779273533418e-05	-0.000228517653707291	-0.000152266127884438
pos_2646	5.41611695012599e-05	-0.000148062664285522	-0.000237522982549289
pos_2647	0.000152193086103968	0.000906416688883575	-0.000192439334993047
pos_2648	0.000528111545567662	0.00239536691316817	-0.000466853662746108
pos_2649	-0.000139330848067471	2.61364982589588e-05	7.56388551358895e-05
pos_265	-2.1595779256222e-06	-0.000207931257386438	0.000142452351382343
pos_2650	0.00360599552461603	-0.00572038823472997	-0.00422067449193631
pos_2651	0.00258426900938608	0.0138153683471038	-0.00389067640004493
pos_2653	-7.60776127739049e-05	0.000306665635031159	0.000543745737741615
pos_2655	0.000779372211395386	0.001862823978537	-0.00185057446038011
pos_2656	1.93757484358563e-05	-0.00029746907098325	0.000144086446722238
pos_2658	0.000734060829038903	-0.0035540865563424	0.00456437004961441
pos_2659	1.18962760263021e-05	-4.34421376011071e-05	6.04613840277416e-05
pos_266	-0.00035162953222678	-7.52518940735801e-05	-4.14285726147546e-05
pos_2660	0.00229369820211973	-0.000525869340751049	0.0140325943371262
pos_2661	0.0017036001874085	-0.00233911301057637	0.0017069177161266
pos_2664	0.000272193908224271	0.000239162855646199	0.000319052657881915
pos_2666	2.68244770741718e-05	-0.000385858086486686	8.69219388695329e-05
pos_2668	3.95632127445375e-05	5.11996370223166e-05	7.61692001242721e-05
pos_267	-3.4621999586089e-05	-0.000399513477918782	0.000214404082452244
pos_2670	0.00263672981263966	0.0152160366038124	-0.0026758000956296
pos_2672	0.000232493769283385	-5.7691491920573e-05	-0.0225992392231033
pos_2675	7.98117319697975e-06	4.2953988967517e-05	-2.27230599053591e-05
pos_2678	-1.52854051257111e-05	-3.38337498891147e-05	2.90022492052661e-05
pos_2679	-1.4994441797392e-05	2.91595310081052e-05	-0.000116546351622957
pos_268	0.000792897874222081	0.00212333329689654	0.00167914582601716
pos_2680	6.40469991191628e-06	-8.27739713729011e-05	-0.000552647775922654
pos_2681	5.88093194030722e-05	-0.000328893290714438	-9.93201111695358e-05
pos_2682	0.0011042185783945	0.00287737556662449	2.63295034293978e-05
pos_2683	0.000767601363752829	0.00136768912561733	0.000822697400338517
pos_2684	-5.65985053112601e-05	-0.00021194575098071	5.5910242026596e-05
pos_2687	0.0037349776480509	-0.0348554341404085	0.0400975246842063
pos_2688	-0.00034232802283797	-0.00044694448776714	-0.000577890129380199
pos_2689	-0.00088010409344535	-0.00110810104927306	-0.00507400798351782
pos_2691	-0.000277817809920804	-0.000419454857737071	-0.000106515662213324
pos_2693	0.000552243598170174	0.00234608621407529	-0.000445593453297609
pos_2695	0.00321168428036235	-0.00842800316486209	0.00702172190014894
pos_2696	3.85563530802013e-06	-9.85110918519856e-05	-3.50205479986677e-05
pos_2697	0.000710271884840354	0.000965963852653437	0.00107697637170406
pos_27	-0.0100557197138668	-0.0143135059789235	0.00773789299448739
pos_270	-0.000507060207921838	-7.24679426649053e-05	0.00272438240505595
pos_2700	0.000168580262522706	-0.000290819974963588	0.000310581462274501
pos_2703	0.000110066896691963	0.000536406013202451	-7.77366988105147e-05
pos_2706	-0.00289864282904379	-0.00850240310402584	0.0026798739744909
pos_2708	0.000203677192273677	-0.000342510487660751	0.000289669669427485
pos_2709	3.99103129457619e-05	0.000224904684264747	-0.000328656622413728
pos_271	0.00140732609487046	0.00201675558215561	0.0108005786735094
pos_2710	-6.71266546630624e-05	-6.21429820053563e-05	7.25092883490917e-06
pos_2711	3.2978260517853e-06	-6.57407631984225e-05	-2.68947944131323e-05
pos_2712	-0.000555019520784371	-0.0136502782816231	0.00197333686571783
pos_2713	5.28503158202825e-05	-0.000154312759184128	-4.66145893784252e-05
pos_2714	6.09093091371738e-06	-0.000200611268911478	0.000148876240133407
pos_2715	0.000210539018459409	0.000935063519246267	-0.000132962771910339
pos_2716	0.0030383140172775	0.00558887761715614	0.00116931982075742
pos_2717	5.58285837248751e-05	0.000177737403815954	-4.34271895139197e-05
pos_2718	0.000142490819359568	0.000215297548434666	0.000183025969145686
pos_2719	0.00283395464077155	0.0151186863135853	-0.00252040732861225
pos_272	-0.000174525323274368	-0.000518353118403822	-0.000179742798447175
pos_2720	0.000625954136312021	-9.15037617831267e-05	-0.00226321991479545
pos_2721	1.69548787133693e-05	-2.45477206285706e-05	7.73269435355982e-05
pos_2722	0.000102011157579116	-0.000335126385755467	0.000375134020697776
pos_2723	-6.20776615130671e-05	-5.20630307301686e-05	-6.28312977608328e-05
pos_2724	-0.00164113269295925	-0.00378535049399976	-0.00628733426886743
pos_2725	-7.22907174338198e-06	0.000167153743215864	-4.16336142533799e-05
pos_2726	3.15312640773466e-05	4.90016969315936e-05	0.000133662235153175
pos_2727	-5.95906862416137e-05	-7.52925662204834e-05	0.000163614347844492
pos_2728	0.003890011677953	0.01143157592429	0.00100189731398898
pos_2729	0.00015822530904962	-0.00116721187346518	-0.000204043450111414
pos_273	0.000399837488387239	-0.000846962864650124	-0.00148782140843222
pos_2730	-5.21019169626871e-05	-0.000108800025936018	0.000451128514794863
pos_2731	-2.07424768535759e-05	-3.29088854210427e-05	-6.1949991041543e-05
pos_2732	-1.20987234348093e-06	-1.43675530023772e-05	1.15745640658526e-05
pos_2734	2.26912781295179e-05	-0.000279689417001872	0.000382243108925324
pos_2735	-0.000108700902126938	-0.00160842899020223	-0.00242848461337823
pos_2736	-0.00857323507182209	-0.0050536459244031	-0.000248844312731545
pos_2737	8.94092721815178e-06	-0.000278201201701118	0.000249841631335193
pos_2738	-1.26645604305307e-05	4.33691761314294e-05	0.000245322840798207
pos_2739	9.46106950477336e-07	-7.31053194775429e-05	3.07680668178151e-05
pos_2740	0.000343653257298258	-0.00212392430250454	-0.00148714564847122
pos_2741	0.000159485860561864	-0.000371927565138203	-0.000129146081825579
pos_2742	0.000260813425188406	-0.000524756724882322	0.000142084623090317
pos_2743	0.000149614602289888	0.000175463289205946	4.1441667880384e-05
pos_2744	0.000107226957609276	-0.000513488725182643	0.000148681028593322
pos_2745	6.92642389013468e-05	-0.000276050249726007	9.93029549017683e-05
pos_2747	2.97329168443875e-05	-7.39562377183433e-05	6.77865046224017e-05
pos_2748	0.000962286094026081	0.00339061760563997	0.000192624396668112
pos_275	-1.5011415058568e-05	-8.7276097315728e-05	0.000119638600648226
pos_2752	0.000118791256711014	0.000518018807637214	-0.00010828034622712
pos_2753	0.000156509795615506	-0.000633366109432603	0.00115349538917091
pos_2755	0.000473114348369242	0.000820626769069777	-0.0027692181396459
pos_2757	1.74279812909571e-05	-0.000156546894570097	0.000276751531560106
pos_2758	0.00263439132798564	0.00856161667616552	0.000674388373593706
pos_2759	-1.03081742247168e-05	-0.00026191961382776	-9.90940748336622e-05
pos_276	3.9591208309206e-05	-0.000261772995761125	0.000398219555292106
pos_2760	0.000564744692026428	0.000530422709120384	0.000627589500820724
pos_2761	0.000858253460079578	-0.00078702829904466	-0.00738917692512727
pos_2762	-5.66218173229289e-05	-0.000438391548731175	0.000258056452983952
pos_2766	-1.04258167889393e-05	-3.76650916192153e-05	1.39911556688155e-05
pos_2768	0.000224618991535097	0.00155079262007407	-0.000224906433291328
pos_2769	-3.82944461962717e-05	0.000107111516226715	7.23609425679489e-05
pos_277	0.000248898826534015	-0.000250227555132245	0.000232852958519682
pos_2771	-0.00400236721360626	-0.00451282672722743	-0.00140314101819733
pos_2775	-0.000480968911537337	-0.00468433488356594	0.0022428667941242
pos_2776	-0.00161961611569677	-6.38640395633885e-05	0.00066297775549746
pos_2779	0.000158785916962671	-9.0713988500336e-05	3.47870994047916e-05
pos_278	0.000138346192494612	-1.39659266694608e-05	0.000851556745343313
pos_2780	8.31977077442007e-06	-7.0601015693343e-05	9.2075730084782e-05
pos_2782	-2.2747178686649e-05	-5.47341644840192e-05	-7.02250527078851e-06
pos_2784	0.00118906590660076	-0.0059787593738205	-0.00987115104343182
pos_2785	3.43867618406566e-05	3.08551805132663e-05	-0.000321509724822152
pos_2787	0.000586956801591508	0.00223908280538021	-0.000635430753488041
pos_2788	-3.4234301740339e-05	-0.000210720604854645	3.26089533309258e-05
pos_2789	1.53537500977952e-05	-8.49702732155986e-05	5.68499767841947e-05
pos_279	0.00264764101003684	0.00406240447549379	-0.0281039037071292
pos_2791	1.86776652557185e-05	-7.43058258908526e-05	3.48339516464942e-05
pos_2792	-3.48118489375128e-05	-0.000142730463029323	8.38578731255359e-05
pos_2793	3.59634617811501e-05	0.000114792456882755	-0.000156250831497233
pos_2794	0.000148002443248532	0.000336892353584288	0.00027982632256031
pos_2795	4.8169214713103e-05	-2.38769044232845e-05	-0.000101942631623858
pos_2796	-2.79940988206143e-05	-0.000138620139638187	2.19758327358742e-05
pos_2797	0.00144814158921798	0.00411139617065568	-0.00011439693451502
pos_2799	0.0009801015684181	-0.0113766896505302	0.0145360172690087
pos_28	0.000471884455575047	-0.00161687785352591	0.00122507008250536
pos_280	-0.000380037194050864	1.43212695186231e-05	0.000382279361694645
pos_2800	-8.04105361784871e-05	-0.000352791427510197	0.000186152660522267
pos_2801	0.00109360176321002	0.00128904341743201	-0.00582786602204193
pos_2802	-5.45697549846792e-05	-0.000107983638124562	0.00111100133394905
pos_2803	0.000958610866428087	0.00442335142154848	0.000137261356964988
pos_2805	0.000200143766795794	0.00109378955719084	-0.000273095115272161
pos_2806	0.000961337987212655	0.00498893760359214	-0.00089359965436292
pos_2809	-3.81691852416983e-05	-0.000378212844641891	0.000263650482374117
pos_281	6.11445386920302e-06	-0.000101320455940652	0.000124179298760685
pos_2810	7.49425070660795e-05	7.54081895114962e-05	-2.11421867702937e-05
pos_2811	0.000199789750304884	0.000645918687043988	-0.000125863745936417
pos_2812	-0.000582112155874409	0.000103767574291728	0.000431284452343384
pos_2813	-1.25907561005606e-05	-0.000203989841250762	0.000146634426811166
pos_2814	0.000119461462978813	0.00037244041469482	-0.000378750692025864
pos_2815	0.000160026270507792	0.000214661001556187	-0.00087821705019415
pos_2816	-7.47725990907677e-05	-5.74006519231828e-05	-1.5023485642893e-06
pos_2817	-8.27933011400392e-05	-0.000323895221523272	0.000597046248782688
pos_2818	0.00700636021002877	-0.00950989620015893	-0.00778581216491812
pos_2819	3.91118101487431e-05	2.09060739923349e-06	-4.71715299357981e-05
pos_282	0.000150033735472879	-0.000425759218620144	0.00035332020518284
pos_2820	0.00051918059310895	0.00140497475713548	0.00155816664012484
pos_2821	0.00265577174050779	0.0105929412890023	-0.00278575959715125
pos_2822	1.37863997060728e-05	-0.000128211230520973	0.000164282326983297
pos_2823	-0.000123964666798179	0.000120489894285308	0.000638629119400622
pos_2824	5.16366588668562e-05	-2.10466611754192e-06	-0.00032227684498117
pos_2825	-0.000186684345041148	-0.000446282180826914	0.000453721074703218
pos_2826	-0.000651840350370727	-0.00248467352383226	0.00191349524708852
pos_2827	6.63540332585251e-05	-4.86320524468667e-05	2.8232511044185e-05
pos_2829	-0.00320435146112852	0.00475488506256793	0.0312880530963783
pos_283	-3.79017412734476e-05	-0.000101869253252209	-5.31940576566365e-06
pos_2830	-1.23590964804392e-05	7.83831737189883e-05	8.27315805712174e-05
pos_2831	0.000466690488195293	-0.00190264810266704	-0.012578565410617
pos_2832	7.67669862322918e-06	-1.76663568933082e-05	-4.45581244347506e-05
pos_2833	1.97599350964121e-05	-6.48086371165362e-06	1.5659513476623e-05
pos_2834	0.00268121310288746	0.00842233506475651	0.000540006884345216
pos_2836	0.00346296369129626	0.0141135049003518	-0.00568352777052749
pos_2837	-1.31985191537304e-05	-0.000310901811259389	-0.000102723153845349
pos_2838	-0.00705535973362153	-0.00890749914162806	-0.0208543719453239
pos_2839	2.65540604903805e-05	-0.000304580767474279	0.000320000488405854
pos_284	-0.000139431894056244	-0.00110904190386472	0.000181612954735025
pos_2841	0.000471640571645419	-0.000400823887701526	0.000483895784213739
pos_2842	-0.00854703415103206	-0.0131162408168905	0.00832822947793959
pos_2843	4.48823984647508e-05	-0.000171094921951209	0.000465228119990541
pos_2844	-2.82161702435933e-05	-0.000671119314937874	-0.000333366556988513
pos_2846	0.00123008078967378	0.00247726871829741	0.000967676179345115
pos_2847	3.10582058042895e-05	-7.58354892306394e-05	0.000105735506104241
pos_2848	0.00222517750550785	-0.00495778858230487	-0.00463591312454964
pos_2849	0.000130471565248022	0.000371442263050293	4.53413757013446e-06
pos_285	-0.000868228541520698	-0.00315694352697453	-0.00133063779970283
pos_2850	2.54848084676907e-06	-9.11631296215193e-06	2.4081517577553e-05
pos_2851	0.000806267992348966	0.00383927672208779	-0.000358203949689627
pos_2853	-0.116883437929501	-0.0854465367139718	-0.283588112264523
pos_2854	-0.00012747578044963	-0.000410924784265147	0.00048581687444363
pos_286	0.000230183645190101	-0.0010900654304456	6.58773276987229e-05
pos_287	-0.0032824593937329	-0.00648039534900321	-0.0155189188820098
pos_288	0.000118450353895701	2.47978542767773e-05	8.93949281216505e-05
pos_289	-0.00493833578415973	-0.0109491225957926	-0.0124625099388489
pos_29	8.31120539830794e-05	-0.000571134795938315	0.000832696413082357
pos_290	-0.000536740772675223	0.00467509836532956	0.00735044047876778
pos_291	0.000290985987297932	-0.000653446254719196	0.000581106318280062
pos_293	-5.61432434652728e-06	1.2391116491235e-05	-4.15512119836725e-05
pos_294	0.00093206546408606	0.00037883079613273	0.00136605765090561
pos_295	0.00260282694649421	-0.00345062616774734	-0.0237306861663607
pos_296	-4.46799697993006e-06	5.2959357980491e-05	3.17991399104199e-05
pos_297	0.000382288795978021	-0.000143955244713356	0.00332249384134389
pos_298	-3.5239751987003e-05	-0.00012502008032865	0.000391861053991422
pos_299	0.000135477491737031	-0.000253672483403435	0.000495090053170804
pos_3	-0.0155792759950397	0.00630679028708728	-0.00643733247244496
pos_30	-0.0815406561697922	-0.0425992118594984	-0.145519308805178
pos_300	-0.000969187642117772	-0.00320163335047217	-0.00847632671862082
pos_301	0.000206293049250124	-0.00157633662732565	-0.000333257823393776
pos_302	-0.000614213599199108	-0.000222073838286532	0.0031253143740546
pos_303	5.90467398512519e-05	-8.83203690256218e-06	-0.000347424215797267
pos_304	5.88932973117552e-05	-0.000238808084348201	0.000258606022679268
pos_305	-0.000113020795559707	7.83850014893127e-05	0.000753812510055516
pos_306	0.0951040332359637	-0.223022837254017	-0.275222790273496
pos_307	-1.53165049011214e-07	4.80757220122568e-05	-7.99883712654897e-05
pos_308	-0.000371344220412221	-0.000395044881218798	-0.00123087737315848
pos_309	0.00366172812751299	0.0101491404919348	-0.000764194367265247
pos_31	0.0234425766061523	-0.0422115494553063	-0.258601330927754
pos_310	4.78654884574043e-07	8.25663060170744e-05	-3.17381734529121e-05
pos_311	1.4373892786027e-05	-5.68273456332948e-05	-0.000281253332236477
pos_312	4.02009807619313e-05	-1.70887472593423e-05	-0.000298591406410007
pos_313	-0.000167817386059575	-0.018451623206853	-0.00291008838730283
pos_314	-0.000158438605087976	-0.000158677634603091	-0.00021525531314577
pos_315	-0.000858860772100868	-8.49027290191945e-06	-0.000251043089151545
pos_316	0.00055221279486575	0.000457038811941136	0.00204915431847173
pos_317	7.87058860417618e-05	-0.000150971075391299	6.33043945024912e-05
pos_318	4.871152481321e-05	0.000115218191771556	-0.000200961498231953
pos_319	0.000285875406238157	-0.000584257856086788	-0.00164488041260375
pos_32	0.000195703145795507	0.000653494054201213	0.000493879718384101
pos_320	4.24519255301109e-06	-0.000383788234007626	-3.49078485256938e-05
pos_321	0.0218866442934511	-0.016984465142132	-0.127481382414445
pos_322	0.0444107841008423	-0.105442313522384	-0.0636542342811877
pos_323	0.000115506210021734	6.06169767620321e-05	-1.82618073863083e-05
pos_324	-6.84675638695509e-05	-0.000180342747421583	-0.000210688171425607
pos_325	-7.50444023075428e-05	-0.000802174758057725	-0.00049283970865326
pos_326	-2.23952320142466e-05	7.95933976001721e-06	1.63086540420015e-05
pos_327	-0.000282641026333942	-0.000624787321789915	-0.00140339244294247
pos_328	0.00254951312289867	-0.00226491955759933	0.00351953158407423
pos_329	0.00104491091410754	0.00316709873977839	0.00161677148870454
pos_33	0.000222077392799138	-0.00229467914872635	0.000116941025599296
pos_330	0.000143963592062452	-0.000384103594733114	0.000424014281243617
pos_331	0.00110450138856006	0.0024096639896486	0.000580591013728091
pos_332	5.09637032119091e-05	-9.18802010797613e-05	-0.000185707420041906
pos_333	0.0311789174646817	0.135432657187576	0.0032846893242773
pos_334	-4.83782700138346e-06	-1.32292160036727e-05	-9.235628618407e-06
pos_335	0.000123558714777089	-8.1064907426174e-05	0.000203890462590496
pos_336	0.00314126876399719	0.0103351292801078	0.00270238884191175
pos_337	-0.000456141457367156	0.000273956544906726	-0.000158628488494342
pos_338	-0.00343254303686193	-0.00460100386911306	-0.000300632882430054
pos_339	-6.32682202911296e-05	-7.3627936668186e-05	-1.18382423349651e-05
pos_34	1.50784396725047e-05	-0.000137992370066047	0.000119574830720606
pos_340	-0.000199639242659858	-0.00046380762534185	-0.000720217066622048
pos_341	0.00113235877402378	0.00348937586520165	0.000380115131811969
pos_343	0.0135345497751184	0.0241937258177922	0.021402723086232
pos_344	5.59024752392143e-05	-0.00064752034718718	0.000438726177872683
pos_345	0.000161667246020279	-0.00118462746714587	-0.000426426521501277
pos_346	0.00260680118220325	-0.0478603229097168	0.0409071840323042
pos_347	8.59151897592991e-05	-0.00325356301853154	0.00181988337959876
pos_348	2.48926711812739e-05	0.000110568903137324	-8.36001584937357e-05
pos_349	-0.000446265261751724	-0.00131607689679997	-0.00136393498400357
pos_35	-0.0242691291308817	-0.0148704040780429	-0.046099121826363
pos_350	-0.000192320303209876	-0.00652572613725558	0.00307202893128755
pos_351	0.000730915433436478	-0.00192890085749774	0.00253775812171934
pos_352	-0.0160666291802292	0.0157790883736678	-0.0798444032800219
pos_353	-3.99683293251891e-05	6.53795788784166e-06	0.000805632883419692
pos_354	0.000791859630212236	-0.00160101899072081	-0.000382819940972396
pos_355	6.41850389198375e-05	-0.00016194538249217	-0.000844428980212016
pos_356	-0.00527693588332024	-0.00786079824835212	0.00272350935070546
pos_357	-0.000327322811774377	0.00200722140806009	0.0046116203848041
pos_359	0.00538420011678459	-0.0175982832504856	0.00246829566059114
pos_36	1.81082620175033e-06	-2.51333907058778e-06	-9.11077340717529e-06
pos_360	0.000238132689344246	-0.00579733461140633	-0.00117826020368458
pos_361	4.16449111063915e-05	7.5860988767956e-05	0.000156738406613957
pos_362	0.0184025605641508	0.0269917329938188	0.0659797458377252
pos_363	0.000286505779686304	-0.00109759222727278	0.00123840593671484
pos_364	0.000577674661965036	-0.00124082114689826	-0.00122056363895068
pos_365	-0.00025153135025358	-0.00044579114841332	-0.000544403807596921
pos_366	0.000173722172443948	-0.000451634237405323	4.78783117664217e-05
pos_367	0.000241339798460455	-0.00076206195536096	-0.00186725471197816
pos_368	6.05038224428121e-05	-0.0027655628872591	0.0119483724344599
pos_369	5.03636766043448e-05	-0.00013540493239924	-0.000206784331248288
pos_37	0.000238760730874792	0.00285824509995523	-0.000737326875769892
pos_370	0.000532018413830808	0.000303602490673326	-0.00321844291142872
pos_371	-0.0010223266990853	0.000473324735861316	0.00408691604514589
pos_372	-6.38809329578641e-05	0.000121894898649328	0.000238003347827052
pos_373	0.00255963671193187	-0.00296634058134415	0.0132941454895478
pos_374	-0.00771857539375774	0.0024859857192606	-0.0053437152981796
pos_375	0.000972660047682	0.00207020067515325	0.00171811587825879
pos_376	0.000516620735018103	0.00253179226570235	-0.00379349593276663
pos_377	-0.000124307998623028	-0.000419835795916434	0.000751465111450556
pos_378	0.000956197088014301	-0.00358041225981427	-0.00265212276511412
pos_379	0.00969618200972967	0.00158926168945406	0.00787531933414782
pos_38	0.0101128571678261	-0.0321956063168672	-0.0689108942765625
pos_380	-0.00178200913991641	-6.41273859358049e-05	0.00434331326751858
pos_381	-1.8853619218335e-05	-0.000122457246715742	7.56302801679178e-06
pos_382	0.000302128942542746	7.42890597812215e-05	-3.57577530262773e-05
pos_383	-0.000898170385137338	0.000360309415416774	0.00161815333799671
pos_384	-1.23753583118986e-05	-0.000235317015190336	-1.72132760633563e-05
pos_385	0.000887616556104598	-0.000574991533020283	0.00133084649942664
pos_386	-0.00630991073976848	0.0873563221416467	-0.0276112829130676
pos_387	-4.19929171766712e-05	-7.87597805416644e-05	-0.000217408292546311
pos_388	-0.00197448812971117	-0.0161629234148142	0.00283901798418914
pos_389	-0.000154144120819126	-0.000898732031684762	0.000678417620138294
pos_39	0.000307786128476874	-0.000571550685136189	-0.00355298950191496
pos_390	-0.000172310289360255	-0.00494775563905328	0.00550986560939514
pos_391	3.68812156394843e-06	0.00011251896921765	0.00014396730294802
pos_392	-0.0321047335551318	-0.108333005955251	0.00485029199557961
pos_393	-1.46488758346042e-05	-0.000222128077995327	3.64102676816734e-05
pos_394	1.87722534020367e-05	-0.000141496702285829	5.46944534649518e-05
pos_395	2.26348742156334e-05	4.35324159882594e-05	8.40955377309999e-06
pos_396	0.000862411033049731	0.00358276629168468	-0.00229134186531654
pos_397	-0.0250461378035831	-0.119543284056974	0.0282483864694599
pos_398	0.0885931621899335	-0.175884973815427	0.0659832809463028
pos_4	0.000228675340141242	-0.00125003645392239	-0.000827788951188049
pos_40	-0.00150160148615256	-0.00208765472568637	0.0012211013864454
pos_401	-0.000141321931517756	-4.73825669264233e-05	-2.63547068309492e-05
pos_402	-0.000323219843150805	-0.0008062080754513	-0.00249416651780169
pos_403	-0.0190619662416579	0.013355426556451	-0.00178650206228094
pos_404	0.000585023483822967	2.71354683474583e-05	0.000940128304711169
pos_405	7.86978556546385e-05	3.93393385161946e-05	0.000186145422730427
pos_406	-0.000199502438924599	0.000530343360097479	0.00194594748564733
pos_407	-2.35511546048787e-05	-0.000119269582640345	9.41041056181739e-05
pos_408	0.000243184259382143	0.000495881511356187	-0.000325153461424656
pos_41	-8.77926590863717e-05	-0.00123956015219146	-0.000897489339592859
pos_410	-0.00279478526942615	-0.0204422965411222	0.0157639338865067
pos_412	9.47605707549536e-06	-3.22721994836941e-05	2.82259316368046e-06
pos_413	-0.00278216383448891	-0.00529624770845909	0.00162479189810726
pos_414	4.89619736288774e-05	-0.000173784662210147	-6.88821436938186e-05
pos_415	-2.08395853528953e-05	3.0157533370193e-05	3.07896453411097e-05
pos_416	0.00221180143809218	-0.00514160086158875	-0.0103405347785127
pos_417	0.000177858435739147	7.54176035248296e-05	0.000886138610489622
pos_418	-0.00259572324981658	-0.00487988523648404	-0.00516836948944765
pos_419	0.000647586277458055	-0.00076176048951747	0.00135713965067215
pos_42	-0.000956478459446198	-0.000957619712316447	-0.000936355559403229
pos_420	-0.000160577564799027	-9.53652446358748e-05	0.000206661655807816
pos_421	3.06511302571054e-06	-1.99478393837136e-05	7.34959669702193e-05
pos_422	4.23861541803949e-05	-3.92459058227668e-05	0.000249861803304986
pos_423	0.000477665141139486	0.000304921337996066	0.000418759535380726
pos_424	0.000137193661531321	-0.000130342001787631	-7.74230676598447e-05
pos_425	0.00177318805415568	-0.0071093290627039	0.00778889408060837
pos_426	0.000107545463696594	-0.000575617120089096	0.000543856195539772
pos_427	4.0599379576785e-05	-0.000100676803348397	-1.41088600467993e-05
pos_428	5.35428022687814e-05	-0.000145919845911397	0.000307175687017125
pos_429	0.000127680773241979	6.23332706654457e-05	-0.000213296081780458
pos_43	5.88533809990705e-05	-6.61839652360058e-05	-0.000222954999477568
pos_431	-8.52628319905416e-05	1.09149330819021e-05	-2.80082486951243e-05
pos_432	0.00249563141635146	-0.00700488748195556	0.00361729093028203
pos_433	-3.41509008227675e-05	-0.00031947755307217	0.000549382119147897
pos_434	0.000263081968209032	0.000881686730717969	0.000455976791318257
pos_436	2.13430261706751e-05	-9.4811875459493e-05	0.000106012268872972
pos_437	1.21817004025433e-05	-0.000166573468618991	-6.30626834558035e-05
pos_438	0.000198895319785574	-0.000271338184327296	-0.000162168940867109
pos_439	0.000270333763274572	-0.00145414309306164	0.000954303466342893
pos_44	-0.00229466448559203	-0.0250958868061683	-0.0301532211952396
pos_441	0.000117479336314354	0.000329647436920071	0.000230414115061226
pos_442	0.000350193522758257	-0.00193528799657713	0.00211868975010123
pos_443	0.000399772112778622	-0.000151046192033611	0.000366846884500576
pos_444	2.02414040091516e-05	-0.000539579310796829	0.000706066592857642
pos_445	0.00136865472481892	0.00310247797804426	0.000284649573743249
pos_446	0.00378354360008989	-0.00219457921484443	0.0106483557894968
pos_447	0.000121239962398938	0.000412007150849613	0.000361128838805914
pos_448	-0.00214242030083186	-0.0282015198554816	0.0053416006453328
pos_449	0.00262847016379879	-0.0407909608101732	0.0224403437303209
pos_45	0.00101587018160403	-0.0182242127338318	-0.0120916821702643
pos_450	-0.0010013771683801	0.00135468585736785	0.0111444079772512
pos_451	-4.16364304946439e-05	-0.000753668577857518	0.000597291775594635
pos_452	1.6709363706609e-06	-0.000114222981859731	0.000155155438588242
pos_453	0.00290983761290634	-0.00549208873293672	0.00195899146291458
pos_454	-0.000836198681490596	0.0025560961130664	0.00943534421447759
pos_455	-0.000703353992230375	-0.01010259881628	-0.00442566554635055
pos_456	-0.000457894063894897	3.92539886829868e-05	0.000713669337143597
pos_457	0.000388747802264451	-0.00195453251165747	0.00248927359953044
pos_458	9.42968817053551e-05	-0.000136337407337268	0.00027391470050433
pos_459	1.2142874695719e-05	-4.13337366144011e-05	3.13524612302531e-05
pos_46	-3.72150349941926e-06	-6.13603428681128e-05	3.71721543372608e-05
pos_460	-2.54661609924815e-05	-0.000222994960265518	-0.00041081805737745
pos_461	0.000598985736153931	-0.0023587833725995	0.000567427267734595
pos_462	9.32252694203067e-05	2.57740054225461e-05	-0.00122992066266168
pos_463	0.00262113137732025	-0.00431021444882579	0.00457314053634909
pos_464	-4.16612574031563e-05	8.10312846626085e-06	-3.94168504937094e-05
pos_465	2.86034180022644e-05	-0.000506163211664136	-6.52011083627958e-05
pos_466	0.000150853624115071	-0.000858764204335525	-1.62984739185458e-05
pos_467	0.025144498066589	-0.0437766719180728	0.0327432004839141
pos_468	8.72917601752461e-05	-0.000218573637401702	0.000274043834790591
pos_469	0.000908075283988839	-0.00155974003547932	0.00134045398902375
pos_47	-0.00358011952120732	0.00131951508271009	0.0193366271629978
pos_470	5.32209348146595e-05	-0.0003371364023249	0.000146230203110392
pos_471	0.000181780011937991	0.000181896185632694	-0.00593145288632658
pos_472	0.000389362502531698	-0.00077457961322258	0.000976474682509233
pos_473	-5.0109967636654e-05	-5.8178819005821e-05	-0.000305829731240843
pos_474	-9.14206640431764e-07	-0.000801038951016083	-0.00137017495125853
pos_475	0.00359557978193953	0.00449986906440732	-0.0160895153302483
pos_476	5.66108777870831e-05	-4.53305892628248e-05	8.38291659381737e-05
pos_477	-3.14111196572234e-06	-0.000126878824116607	5.06603845058847e-05
pos_478	0.000227622044453997	-0.000180126781664869	0.000280998791229455
pos_479	6.51666030305186e-05	-0.000377507608918841	2.89184663782796e-05
pos_48	-5.83822662854001e-05	-0.000160009406112622	0.000244726114999124
pos_480	-5.21658346652491e-05	-0.000261320209823381	0.000166432135290877
pos_481	7.52547649660213e-05	0.000247294973324662	9.16444243802307e-06
pos_482	0.000126990113803441	-4.97406117644257e-05	-0.000310586771620722
pos_483	-0.000311753666369848	-0.000123640052866625	-0.00023520837180897
pos_484	-4.17838281254238e-05	-0.000571620320395469	-0.00134744315993464
pos_485	-1.37823250725858e-05	1.67560725459404e-05	-0.000221291540517368
pos_486	1.2535110227291e-05	-0.000454680768650027	0.000202750008313684
pos_487	2.10146987434404e-05	-0.000110178732378203	-0.000154512819272215
pos_488	0.000394071176856608	0.000810260265941249	0.000660730403734771
pos_489	0.00357060369353411	0.00289072374056208	0.00431770258543836
pos_49	0.00252638856156057	0.00682706889681622	0.00216197409177892
pos_490	-0.00143918155261036	0.00110415014957471	-0.00169118904246794
pos_491	0.00013092187758244	-0.000444850436335928	-7.32743535457169e-05
pos_492	0.000113606356919144	-0.00127609999079149	0.0013727845357498
pos_493	-1.52256892320106e-05	-5.36614839236188e-05	3.3953865810174e-05
pos_494	-1.01127872863648e-05	-9.87857010815046e-05	-6.40158413215389e-05
pos_495	3.1911754881042e-05	-0.000258626340162796	-9.22347022303244e-05
pos_496	0.000507644788939975	0.00192648860334571	0.00129010406833759
pos_497	-0.000502845739966605	-0.000366389920576397	-0.00264458216918753
pos_498	5.44044311811068e-05	0.000324192885693063	-0.000251309631980346
pos_499	-0.000225782428738194	-0.00131925404703464	-0.00221966346311276
pos_5	8.06504501861241e-06	-0.000140873452903739	0.000179351161511989
pos_50	-0.00023664506677779	0.00103440280470848	0.00104433872211142
pos_500	0.0015071304119456	0.00343048592946599	0.000297381352011552
pos_501	0.000626993359334583	-0.0007764565883949	0.000242287504137652
pos_502	2.97415691627473e-05	-3.47661171860321e-05	-2.05993510844537e-05
pos_503	-0.000108360382895577	-5.55329274815647e-05	-4.59846497242145e-05
pos_504	0.00058871373025018	0.000618734706771906	-0.000485479098171858
pos_505	0.00751559679620494	-0.00484460163896733	-0.0438675580434525
pos_506	-8.19395880061103e-05	-0.00142313656514275	-0.000372849688031145
pos_507	0.000112721809070858	-0.000278438358685627	0.000369448518608264
pos_508	4.71918171965992e-05	-0.000110374663962597	5.35334020028128e-06
pos_509	2.19737088374027e-05	-8.19142293584944e-05	-9.12395745780187e-06
pos_51	-0.000675655498536453	-8.35282411604145e-05	-0.000405634927435379
pos_510	0.00550667880212512	-0.00879681132997375	-0.0187755514846117
pos_511	0.000942101282957463	0.000276815553856486	0.000997172300515109
pos_512	0.000161661691482822	-0.00032852165619413	0.00039032377968764
pos_513	-0.000556790591779804	-0.00041360690637951	8.79296327414553e-05
pos_514	-0.00103156310308995	-0.00182860333610272	-0.00268140295175232
pos_515	9.14928682800401e-05	-0.000241574445579739	1.22291052419524e-05
pos_516	-0.000146548835808737	9.44263020151435e-05	0.00011441313234603
pos_517	0.0007278638572221	0.00263210234057212	-0.000756102880629627
pos_518	-4.34398499800211e-05	0.000233063394889709	5.21067573020366e-05
pos_519	-1.81458738507553e-05	4.86464834883275e-05	-4.96945549830738e-05
pos_52	-0.00071855867550595	-0.00273231409168737	-0.00539034418035468
pos_520	-0.00429787623544876	0.000337930139033742	0.00224747354003553
pos_521	2.61272121889436e-05	-0.000282554672048777	0.000215387146378522
pos_522	-0.000238192940906621	-0.000187682682800267	0.00024671312183574
pos_523	0.000242647762172167	-0.00108035789846169	-0.0027103229828902
pos_524	5.05136959426946e-05	-0.000118117043442432	-0.000201747077870882
pos_525	-0.000292360779115702	-0.000433052633900808	-0.00120242943231309
pos_526	2.77156701167703e-05	-4.35169015068298e-05	8.88825710026574e-05
pos_527	0.000797654390021209	0.00346388037193245	-0.000359849756379448
pos_528	-5.45084844054705e-05	-0.000172229766812593	-0.000585521530121681
pos_529	-7.66549243084498e-06	-0.000136913161332447	-0.000200943731618419
pos_53	4.55377794051672e-05	9.97769491470267e-05	4.17134382032511e-05
pos_530	1.9561257199415e-05	0.000117804633726427	-0.000318431311702657
pos_531	-5.48613308350058e-05	2.74332455830665e-06	0.000447957991995858
pos_532	0.000250573778210782	0.00113700747492921	-0.00931311617632904
pos_533	-4.98181247167904e-05	-4.49990382761257e-05	0.000167828947450436
pos_534	0.000495579597860694	-0.000916057988190318	-7.11147883405385e-05
pos_535	0.000389762872039084	-0.000808139230459974	0.000713915079135241
pos_536	9.14822664381551e-05	-5.7695095271024e-05	-2.91070051231346e-05
pos_537	0.000234782221573942	0.000519935230483466	7.86464872182711e-05
pos_538	1.4267288382427e-05	-0.000124164105233785	-7.41436498998534e-05
pos_539	-0.00302868218417088	0.000756170670989589	0.00110765825570396
pos_54	0.00024221754000429	-0.000684221794996041	-0.000175134281955562
pos_540	-9.43450649772561e-05	-0.000138926938091033	0.00026320272048319
pos_541	-1.53362625542543e-05	-0.000130684723272366	-0.000356783986514796
pos_542	5.84171476009782e-05	0.000128270269583816	0.000105199313469964
pos_543	-0.000301545618364234	-0.000428602420403882	0.000729103545414891
pos_544	4.11848286332726e-05	-4.70525182795938e-05	4.16549960222046e-05
pos_545	0.000330743315235126	0.00181106264422853	-0.000285047900848888
pos_546	0.00412625368359849	0.00383854636241262	-0.0151374592119672
pos_547	0.0153774583359291	-0.0610480762149954	0.0314071844771147
pos_548	0.000128159147959572	-0.000584734175033241	0.000567813538759005
pos_549	0.0112368354814705	0.0362888502147842	-0.00384419488326831
pos_55	-1.07052665909089e-05	-0.000179830302636662	-4.20281065678224e-05
pos_550	-0.00398596345827588	-0.00295155695188535	0.00937451380371143
pos_551	0.000538995720464903	0.00241074839479532	-0.000364789674544826
pos_552	-8.24399421399497e-05	3.44410301702583e-05	-0.00010074451633256
pos_553	-0.000489344699994008	0.000470188304367024	0.000523818754724334
pos_554	9.17161683798232e-05	-0.000934513013809909	0.00150919968526442
pos_555	-5.33822013906308e-05	-8.82864223321962e-05	-0.000167985646508038
pos_556	-0.000566324175402452	-3.26258103169814e-05	0.00356669784149991
pos_557	-5.86668368832094e-05	-0.000160738061843333	-0.000143107969131165
pos_558	-0.00345626262048076	-0.00714162319498973	-0.00356152328766519
pos_559	-3.47260885968763e-05	-3.15216294687203e-05	7.12761106316858e-05
pos_56	-0.000563633101771847	-0.000999069268809764	0.00137853622513677
pos_560	3.44870756384326e-05	-0.000490900666968506	-0.00104459837106151
pos_561	1.45172525403725e-05	-2.18841689455335e-05	-4.45588683327133e-05
pos_562	0.000942547231874237	-0.00133229881009623	-0.00118465009744453
pos_563	-0.000380826095995432	9.19258201318955e-05	-6.74609547717198e-05
pos_564	4.87133595912372e-05	9.68965980586673e-05	-2.44415209686399e-05
pos_565	-9.42678421093259e-05	-1.07324465121559e-05	0.000281014101785443
pos_566	8.68223517274173e-05	5.46266626525094e-05	-0.000345334625495995
pos_567	-8.66395204807723e-05	-0.000810414782223389	0.000270421431846798
pos_568	-1.68750280403952e-05	-2.66881908438748e-05	-5.49421357305271e-05
pos_569	2.72704212591546e-05	-6.02707858800331e-05	-0.000322668837219508
pos_57	-0.00455466149240889	0.0021385753425511	0.00123614054120409
pos_570	-0.000390320279906454	-0.000337636801869328	0.000949307811408418
pos_571	3.57413764082818e-05	-6.81631194236812e-05	-3.13731293600937e-05
pos_572	-0.00176098336243788	0.016715740047018	0.0207719337783009
pos_573	5.79005556576441e-05	0.000118784279835131	9.02927764336582e-05
pos_574	-0.00174924654423749	0.00104390292249025	0.00960342212855856
pos_575	3.70372889812682e-05	-0.000141050354901272	0.000353763614261461
pos_576	-4.82814609824486e-05	8.54200465988827e-05	4.32779768896641e-05
pos_577	-0.000169028570469611	-0.000468203493202312	-0.000811307922644064
pos_578	0.000291642960233636	0.000471861244528227	0.00119992899632681
pos_579	-0.0360796479505093	0.00860630078415082	-0.00429364784888889
pos_58	0.000875232540062805	0.00159270488441049	0.00265060407858527
pos_580	-5.91619990936579e-05	-4.28587646859098e-05	-2.08893756696427e-05
pos_581	-6.291853557011e-05	-3.42241733491215e-05	-0.000381239088037361
pos_582	-0.00082056408742774	-0.00219892937509371	-0.00453412527451408
pos_583	-0.00122862667642341	-0.004022426785593	-0.0115872857403616
pos_584	-0.000250546536905817	-0.00110962130549399	-0.0065111175581946
pos_585	-0.0093318159052191	-0.00596767173689678	0.00828732519566534
pos_586	-0.000111668702603136	8.14621841947144e-05	0.000257074480881869
pos_587	1.81534222330814e-05	-0.00184417660361435	0.000538559207980129
pos_588	0.000710862800676876	-0.0019741311967793	-0.00758690509696466
pos_589	-6.66646775610633e-05	-0.00016119999076317	-0.000298043795357695
pos_59	0.0381271585328026	-0.0576567862134094	-0.155746287158516
pos_590	5.92324057807881e-05	-0.000198252572196623	0.000244127765294105
pos_591	0.0083928335178771	0.00964076047543899	0.0116611630261649
pos_592	0.00171804553728291	0.00499753714897885	-0.00123693417265658
pos_593	0.000697724393208619	-0.00101533521167307	-0.00519326380830131
pos_594	-8.08061926175929e-05	-0.000112495942019151	-0.000404816303614587
pos_595	-0.000313185954298093	-0.000463675527016378	0.000137069271575483
pos_596	0.000748413381972385	0.00208743552784953	-0.00394487181536069
pos_597	0.00300146631618729	-0.0175293054778164	0.0252623472041719
pos_598	0.00912553105974179	-0.0806367333336855	-0.0377868204555076
pos_599	3.59838803994343e-05	-0.000664848162898031	0.000254245852700973
pos_6	-0.496488787868194	0.160838276559542	0.420865175460016
pos_60	0.000934913329943332	-0.00197274789200959	0.000722573145529578
pos_600	-1.98133824739226e-05	-0.000117828003310157	-9.81491205224666e-05
pos_601	-3.38331166103906e-05	-2.23727622792298e-05	-0.000114251360030843
pos_602	2.83829469003262e-05	0.000144882099784978	-1.9080984123142e-05
pos_603	2.78330845860403e-05	-3.07292672876619e-05	-2.73510119141843e-05
pos_604	0.000211892451963583	0.000400002788348035	-0.00158167918379117
pos_605	0.0014365785191917	0.00218496386211379	0.00400218127096559
pos_606	0.000626889388051351	-0.0011544156240447	-0.00113009032364885
pos_607	-7.61567592850136e-05	2.86240726315025e-05	0.000461986570289979
pos_608	-1.84243011368529e-05	0.000114053796196641	0.000399385349361501
[truncated: 401 more rows]
