# Supplementary material for: Multi-omics analyses reveal that the gut microbiome and its metabolites promote milk fat synthesis in Zhongdian yak cows
Source: PeerJ journal article supplement (doi:10.7717/peerj.14444), 2022-12-02
Supplement: biomarker_Web_Report_.zip [file meta_hmdb_anno_categroy.xls]

SuperClass	HMDB_taxonomy	Metabolites_nums	Metabolites
Alkaloids and derivatives	Aporphines	3	pos_1566 pos_1650 pos_1447
Alkaloids and derivatives	Morphinans	1	pos_1447
Alkaloids and derivatives	Phthalide isoquinolines	2	pos_1566 pos_1447
Benzenoids	Benzene and substituted derivatives	18	pos_1874 pos_2710 pos_1427 pos_1138 pos_2788 pos_363 pos_2827 pos_41 pos_492 pos_368 pos_22 pos_2536 pos_1750 pos_2385 pos_2048 pos_1622 pos_112 pos_159
Benzenoids	Phenol ethers	27	pos_2710 pos_22 pos_2314 pos_2826 pos_2827 pos_1254 pos_368 pos_982 pos_2536 pos_492 pos_2048 pos_1427 pos_1138 pos_786 pos_1398 pos_2385 pos_1874 pos_36 pos_1392 pos_2788 pos_363 pos_2850 pos_41 pos_1750 pos_1622 pos_112 pos_159
Benzenoids	Phenols	25	pos_2710 pos_22 pos_2314 pos_2826 pos_2827 pos_1254 pos_368 pos_2536 pos_492 pos_2048 pos_1427 pos_1138 pos_786 pos_2385 pos_1874 pos_36 pos_1392 pos_2788 pos_363 pos_2850 pos_41 pos_1750 pos_1622 pos_112 pos_159
Homogeneous non-metal compounds	Non-metal oxoanionic compounds	1	pos_2612
Hydrocarbons	Unsaturated hydrocarbons	2	pos_2474 pos_296
Lignans, neolignans and related compounds	Flavonolignans	1	pos_1388
Lignans, neolignans and related compounds	Lignan glycosides	2	pos_2568 pos_1388
Lipids and lipid-like molecules	Fatty Acyls	119	pos_1492 pos_1965 pos_1252 pos_1510 pos_2382 pos_1711 pos_1005 pos_827 pos_560 pos_250 pos_627 pos_2292 pos_1131 pos_664 pos_2277 pos_2744 pos_800 pos_2560 pos_1998 pos_1493 pos_1201 pos_1570 pos_2760 pos_577 pos_2356 pos_1717 pos_1442 pos_2759 pos_37 pos_2480 pos_2484 pos_809 pos_779 pos_2800 pos_2578 pos_2169 pos_2819 pos_522 pos_2679 pos_1041 pos_1271 pos_796 pos_1426 pos_1180 pos_2351 pos_284…
Lipids and lipid-like molecules	Glycerolipids	57	pos_1492 pos_2480 pos_2000 pos_2484 pos_2557 pos_840 pos_2800 pos_1026 pos_2578 pos_1510 pos_1565 pos_1711 pos_2382 pos_2262 pos_527 pos_1147 pos_2224 pos_827 pos_2679 pos_1041 pos_2579 pos_2561 pos_1159 pos_1857 pos_796 pos_1426 pos_2292 pos_1131 pos_2351 pos_664 pos_1966 pos_800 pos_2695 pos_2419 pos_1307 pos_2560 pos_701 pos_1616 pos_2154 pos_2369 pos_1421 pos_1004 pos_1790 pos_1493 pos_1201 p…
Lipids and lipid-like molecules	Glycerophospholipids	212	pos_1492 pos_1339 pos_1891 pos_1965 pos_1593 pos_1252 pos_1510 pos_2382 pos_1711 pos_1684 pos_1005 pos_2195 pos_827 pos_560 pos_250 pos_627 pos_2769 pos_2458 pos_2292 pos_1247 pos_1131 pos_664 pos_2277 pos_2229 pos_2615 pos_2743 pos_1470 pos_705 pos_2744 pos_800 pos_1498 pos_2703 pos_1865 pos_2560 pos_1926 pos_1018 pos_1125 pos_1998 pos_1493 pos_1201 pos_1570 pos_2760 pos_2219 pos_2613 pos_577 po…
Lipids and lipid-like molecules	Prenol lipids	263	pos_1492 pos_1339 pos_1891 pos_1965 pos_1593 pos_1252 pos_1510 pos_2382 pos_1711 pos_1684 pos_1005 pos_2195 pos_827 pos_560 pos_250 pos_627 pos_598 pos_1521 pos_2769 pos_301 pos_2458 pos_1445 pos_467 pos_2292 pos_1247 pos_1131 pos_664 pos_2277 pos_2229 pos_2615 pos_2743 pos_1470 pos_2853 pos_705 pos_2744 pos_800 pos_1498 pos_2703 pos_1865 pos_2560 pos_1926 pos_1018 pos_1125 pos_1998 pos_1493 pos_…
Lipids and lipid-like molecules	Sphingolipids	299	pos_1492 pos_1339 pos_1891 pos_1965 pos_2481 pos_1593 pos_1252 pos_1510 pos_3 pos_2382 pos_1711 pos_1684 pos_1005 pos_2195 pos_827 pos_560 pos_250 pos_627 pos_598 pos_1521 pos_2769 pos_301 pos_2458 pos_574 pos_1445 pos_1204 pos_467 pos_2292 pos_1247 pos_1131 pos_664 pos_2277 pos_2229 pos_2615 pos_2743 pos_1470 pos_2853 pos_705 pos_2744 pos_800 pos_1498 pos_2703 pos_1865 pos_2560 pos_1926 pos_1018…
Lipids and lipid-like molecules	Steroids and steroid derivatives	294	pos_1492 pos_1339 pos_1891 pos_1965 pos_2481 pos_1593 pos_1252 pos_1510 pos_3 pos_2382 pos_1711 pos_1684 pos_1005 pos_2195 pos_827 pos_560 pos_250 pos_627 pos_598 pos_1521 pos_2769 pos_301 pos_2458 pos_574 pos_1445 pos_1204 pos_467 pos_2292 pos_1247 pos_1131 pos_664 pos_2277 pos_2229 pos_2615 pos_2743 pos_1470 pos_2853 pos_705 pos_2744 pos_800 pos_1498 pos_2703 pos_1865 pos_2560 pos_1926 pos_1018…
Nucleosides, nucleotides, and analogues	5')-dinucleotides	8	pos_545 pos_531 pos_2182 pos_1429 pos_2409 pos_2601 pos_1025 pos_2792
Nucleosides, nucleotides, and analogues	Purine nucleosides	1	pos_1025
Nucleosides, nucleotides, and analogues	Purine nucleotides	9	pos_545 pos_531 pos_2182 pos_1429 pos_2409 pos_2601 pos_1025 pos_2792 pos_602
Nucleosides, nucleotides, and analogues	Pyrimidine nucleosides	5	pos_531 pos_2182 pos_1429 pos_1025 pos_2792
Nucleosides, nucleotides, and analogues	Pyrimidine nucleotides	6	pos_531 pos_2182 pos_1429 pos_2409 pos_1025 pos_2792
Organic Polymers	Polypeptides	1	pos_2323
Organic acids and derivatives	Carboximidic acids and derivatives	87	pos_782 pos_2624 pos_2487 pos_807 pos_759 pos_770 pos_2 pos_733 pos_615 pos_2310 pos_2118 pos_709 pos_671 pos_1674 pos_650 pos_251 pos_1439 pos_767 pos_1267 pos_2506 pos_1092 pos_2004 pos_1675 pos_1696 pos_674 pos_1573 pos_2813 pos_2447 pos_2816 pos_1972 pos_829 pos_766 pos_1720 pos_1896 pos_717 pos_814 pos_462 pos_1160 pos_1924 pos_1518 pos_1416 pos_1323 pos_535 pos_1369 pos_592 pos_2658 pos_119…
Organic acids and derivatives	Carboxylic acids and derivatives	77	pos_2624 pos_807 pos_759 pos_770 pos_2 pos_733 pos_615 pos_2310 pos_2118 pos_709 pos_671 pos_1674 pos_650 pos_251 pos_1439 pos_767 pos_1267 pos_2506 pos_1092 pos_2004 pos_1675 pos_1696 pos_1573 pos_2813 pos_2447 pos_2816 pos_1972 pos_829 pos_766 pos_1720 pos_1896 pos_814 pos_462 pos_1160 pos_1924 pos_1518 pos_1416 pos_1323 pos_535 pos_1369 pos_592 pos_1195 pos_2687 pos_1927 pos_2716 pos_2136 pos_…
Organic acids and derivatives	Hydroxy acids and derivatives	85	pos_782 pos_2624 pos_2487 pos_807 pos_759 pos_770 pos_2 pos_733 pos_615 pos_2310 pos_2118 pos_709 pos_671 pos_1674 pos_650 pos_251 pos_1439 pos_767 pos_1267 pos_2506 pos_1092 pos_2004 pos_1675 pos_1696 pos_674 pos_1573 pos_2813 pos_2447 pos_2816 pos_1972 pos_829 pos_766 pos_1720 pos_1896 pos_717 pos_814 pos_462 pos_1160 pos_1924 pos_1518 pos_1416 pos_1323 pos_535 pos_1369 pos_592 pos_1195 pos_268…
Organic acids and derivatives	Keto acids and derivatives	3	pos_1027 pos_1195 pos_2687
Organic acids and derivatives	Organic phosphoric acids and derivatives	86	pos_782 pos_2624 pos_2487 pos_807 pos_759 pos_770 pos_2 pos_733 pos_615 pos_2310 pos_2118 pos_709 pos_671 pos_1674 pos_650 pos_251 pos_1439 pos_767 pos_1267 pos_2506 pos_1092 pos_2004 pos_1675 pos_1696 pos_674 pos_1573 pos_2813 pos_2447 pos_2816 pos_1972 pos_829 pos_766 pos_1720 pos_1896 pos_717 pos_814 pos_462 pos_1160 pos_1924 pos_1518 pos_1416 pos_1323 pos_535 pos_1369 pos_592 pos_2658 pos_119…
Organic acids and derivatives	Organic sulfuric acids and derivatives	82	pos_782 pos_2624 pos_2487 pos_807 pos_759 pos_770 pos_2 pos_733 pos_615 pos_2310 pos_2118 pos_709 pos_671 pos_1674 pos_650 pos_251 pos_1439 pos_767 pos_1267 pos_2506 pos_1092 pos_2004 pos_1675 pos_1696 pos_1573 pos_2813 pos_2447 pos_2816 pos_1972 pos_829 pos_766 pos_1720 pos_1896 pos_814 pos_462 pos_1160 pos_1924 pos_1518 pos_1416 pos_1323 pos_535 pos_1369 pos_592 pos_1195 pos_2687 pos_1927 pos_2…
Organic acids and derivatives	Peptidomimetics	80	pos_2624 pos_807 pos_759 pos_770 pos_2 pos_733 pos_615 pos_2310 pos_2118 pos_709 pos_671 pos_1674 pos_650 pos_251 pos_1439 pos_767 pos_1267 pos_2506 pos_1092 pos_2004 pos_1675 pos_1696 pos_1573 pos_2813 pos_2447 pos_2816 pos_1972 pos_829 pos_766 pos_1720 pos_1896 pos_814 pos_462 pos_1160 pos_1924 pos_1518 pos_1416 pos_1323 pos_535 pos_1369 pos_592 pos_1195 pos_2687 pos_1927 pos_2716 pos_2136 pos_…
Organic nitrogen compounds	Organonitrogen compounds	16	pos_1699 pos_1713 pos_514 pos_1438 pos_1662 pos_2541 pos_813 pos_884 pos_1001 pos_866 pos_1275 pos_2730 pos_1 pos_879 pos_300 pos_2204
Organic oxygen compounds	Organooxygen compounds	38	pos_816 pos_543 pos_1241 pos_1444 pos_976 pos_593 pos_1431 pos_2258 pos_2087 pos_21 pos_1608 pos_638 pos_2116 pos_542 pos_799 pos_1440 pos_2785 pos_1285 pos_752 pos_2731 pos_2379 pos_2656 pos_863 pos_1009 pos_472 pos_2531 pos_1902 pos_1129 pos_477 pos_2013 pos_634 pos_2649 pos_2590 pos_77 pos_2363 pos_1842 pos_1525 pos_19
Organohalogen compounds	Alkyl halides	1	pos_154
Organoheterocyclic compounds	Azaphilones	20	pos_1729 pos_2720 pos_1286 pos_1986 pos_1153 pos_1588 pos_2162 pos_172 pos_597 pos_764 pos_431 pos_2096 pos_1541 pos_564 pos_152 pos_1740 pos_2028 pos_2218 pos_118 pos_1569
Organoheterocyclic compounds	Azepines	29	pos_1729 pos_2720 pos_2322 pos_1286 pos_1986 pos_1153 pos_1588 pos_2545 pos_298 pos_2162 pos_172 pos_597 pos_764 pos_2205 pos_2539 pos_431 pos_2096 pos_2316 pos_2635 pos_1541 pos_564 pos_152 pos_1740 pos_625 pos_2028 pos_2218 pos_2364 pos_118 pos_1569
Organoheterocyclic compounds	Azoles	32	pos_1729 pos_2720 pos_2322 pos_1286 pos_1986 pos_1153 pos_1588 pos_2545 pos_298 pos_2162 pos_172 pos_597 pos_764 pos_481 pos_2205 pos_2539 pos_431 pos_2096 pos_2316 pos_2635 pos_1541 pos_564 pos_152 pos_1740 pos_625 pos_2028 pos_590 pos_2218 pos_2364 pos_118 pos_1569 pos_61
Organoheterocyclic compounds	Benzimidazoles	36	pos_1729 pos_2720 pos_2322 pos_1286 pos_1986 pos_1153 pos_1588 pos_2545 pos_298 pos_2162 pos_172 pos_929 pos_668 pos_597 pos_683 pos_764 pos_676 pos_481 pos_2205 pos_2539 pos_431 pos_2096 pos_2316 pos_2635 pos_1541 pos_564 pos_152 pos_1740 pos_625 pos_2028 pos_590 pos_2218 pos_2364 pos_118 pos_1569 pos_61
Organoheterocyclic compounds	Benzodioxanes	13	pos_2720 pos_597 pos_2028 pos_1286 pos_152 pos_2218 pos_1153 pos_1541 pos_118 pos_1569 pos_1588 pos_564 pos_764
Organoheterocyclic compounds	Benzodioxoles	38	pos_1729 pos_2720 pos_2322 pos_1286 pos_69 pos_1986 pos_1153 pos_761 pos_1588 pos_2545 pos_298 pos_2162 pos_172 pos_929 pos_668 pos_597 pos_683 pos_764 pos_676 pos_481 pos_2205 pos_2539 pos_431 pos_2096 pos_2316 pos_2635 pos_1541 pos_564 pos_152 pos_1740 pos_625 pos_2028 pos_590 pos_2218 pos_2364 pos_118 pos_1569 pos_61
Organoheterocyclic compounds	Benzopyrans	28	pos_1729 pos_2720 pos_2322 pos_1286 pos_1986 pos_1153 pos_1588 pos_2545 pos_298 pos_2162 pos_172 pos_597 pos_764 pos_2205 pos_2539 pos_431 pos_2096 pos_2316 pos_1541 pos_564 pos_152 pos_1740 pos_625 pos_2028 pos_2218 pos_2364 pos_118 pos_1569
Organoheterocyclic compounds	Diazinanes	16	pos_1729 pos_2720 pos_597 pos_2028 pos_1286 pos_152 pos_431 pos_2218 pos_1153 pos_1541 pos_118 pos_1569 pos_1588 pos_564 pos_764 pos_172
Organoheterocyclic compounds	Diazines	18	pos_1729 pos_2720 pos_2162 pos_597 pos_2028 pos_1286 pos_152 pos_431 pos_2218 pos_1153 pos_1541 pos_118 pos_1569 pos_1588 pos_564 pos_764 pos_1740 pos_172
Organoheterocyclic compounds	Furans	25	pos_1729 pos_2720 pos_2322 pos_1286 pos_1986 pos_1153 pos_1588 pos_2545 pos_2162 pos_172 pos_597 pos_764 pos_2205 pos_431 pos_2096 pos_2316 pos_1541 pos_564 pos_152 pos_1740 pos_625 pos_2028 pos_2218 pos_118 pos_1569
Organoheterocyclic compounds	Furofurans	31	pos_1729 pos_2720 pos_2322 pos_1286 pos_1986 pos_1153 pos_1588 pos_2545 pos_298 pos_2162 pos_172 pos_597 pos_764 pos_481 pos_2205 pos_2539 pos_431 pos_2096 pos_2316 pos_2635 pos_1541 pos_564 pos_152 pos_1740 pos_625 pos_2028 pos_590 pos_2218 pos_2364 pos_118 pos_1569
Organoheterocyclic compounds	Imidazopyrimidines	12	pos_2720 pos_597 pos_2028 pos_1286 pos_152 pos_2218 pos_1153 pos_1541 pos_118 pos_1569 pos_564 pos_764
Organoheterocyclic compounds	Indoles and derivatives	4	pos_1153 pos_1541 pos_764 pos_118
Organoheterocyclic compounds	Lactones	37	pos_1729 pos_2720 pos_2322 pos_1286 pos_69 pos_1986 pos_1153 pos_1588 pos_2545 pos_298 pos_2162 pos_172 pos_929 pos_668 pos_597 pos_683 pos_764 pos_676 pos_481 pos_2205 pos_2539 pos_431 pos_2096 pos_2316 pos_2635 pos_1541 pos_564 pos_152 pos_1740 pos_625 pos_2028 pos_590 pos_2218 pos_2364 pos_118 pos_1569 pos_61
Organoheterocyclic compounds	Naphthopyrans	24	pos_1729 pos_2720 pos_1286 pos_1986 pos_1153 pos_1588 pos_2545 pos_2162 pos_172 pos_597 pos_764 pos_2205 pos_431 pos_2096 pos_2316 pos_1541 pos_564 pos_152 pos_1740 pos_625 pos_2028 pos_2218 pos_118 pos_1569
Organoheterocyclic compounds	Piperidines	34	pos_1729 pos_2720 pos_2322 pos_1286 pos_1986 pos_1153 pos_1588 pos_2545 pos_298 pos_2162 pos_172 pos_929 pos_668 pos_597 pos_764 pos_481 pos_2205 pos_2539 pos_431 pos_2096 pos_2316 pos_2635 pos_1541 pos_564 pos_152 pos_1740 pos_625 pos_2028 pos_590 pos_2218 pos_2364 pos_118 pos_1569 pos_61
Organoheterocyclic compounds	Pteridines and derivatives	19	pos_1729 pos_2720 pos_1286 pos_1986 pos_1153 pos_1588 pos_2162 pos_172 pos_597 pos_764 pos_431 pos_1541 pos_564 pos_152 pos_1740 pos_2028 pos_2218 pos_118 pos_1569
Organoheterocyclic compounds	Pyrans	26	pos_1729 pos_2720 pos_2322 pos_1286 pos_1986 pos_1153 pos_1588 pos_2545 pos_2162 pos_172 pos_597 pos_764 pos_2205 pos_431 pos_2096 pos_2316 pos_1541 pos_564 pos_152 pos_1740 pos_625 pos_2028 pos_2218 pos_2364 pos_118 pos_1569
Organoheterocyclic compounds	Pyridines and derivatives	22	pos_1729 pos_2720 pos_1286 pos_1986 pos_1153 pos_1588 pos_2545 pos_2162 pos_172 pos_597 pos_764 pos_2205 pos_431 pos_2096 pos_1541 pos_564 pos_152 pos_1740 pos_2028 pos_2218 pos_118 pos_1569
Organoheterocyclic compounds	Pyrrolidines	14	pos_2720 pos_597 pos_2028 pos_1286 pos_152 pos_2218 pos_1153 pos_1541 pos_118 pos_1569 pos_1588 pos_564 pos_764 pos_172
Organoheterocyclic compounds	Quinolines and derivatives	35	pos_1729 pos_2720 pos_2322 pos_1286 pos_1986 pos_1153 pos_1588 pos_2545 pos_298 pos_2162 pos_172 pos_929 pos_668 pos_597 pos_764 pos_676 pos_481 pos_2205 pos_2539 pos_431 pos_2096 pos_2316 pos_2635 pos_1541 pos_564 pos_152 pos_1740 pos_625 pos_2028 pos_590 pos_2218 pos_2364 pos_118 pos_1569 pos_61
Organoheterocyclic compounds	Tetrahydrofurans	30	pos_1729 pos_2720 pos_2322 pos_1286 pos_1986 pos_1153 pos_1588 pos_2545 pos_298 pos_2162 pos_172 pos_597 pos_764 pos_481 pos_2205 pos_2539 pos_431 pos_2096 pos_2316 pos_2635 pos_1541 pos_564 pos_152 pos_1740 pos_625 pos_2028 pos_2218 pos_2364 pos_118 pos_1569
Organoheterocyclic compounds	Tetrahydroisoquinolines	1	pos_1153
Organoheterocyclic compounds	Tetrapyrroles and derivatives	8	pos_2720 pos_1286 pos_152 pos_2218 pos_1153 pos_1541 pos_118 pos_764
Organosulfur compounds	Thioethers	2	pos_537 pos_325
Phenylpropanoids and polyketides	3,4-dihydrocoumarins	17	pos_149 pos_936 pos_387 pos_16 pos_2670 pos_2279 pos_1193 pos_2493 pos_1687 pos_1763 pos_1831 pos_1289 pos_1500 pos_203 pos_276 pos_173 pos_117
Phenylpropanoids and polyketides	Alpha-methyldeoxybenzoin flavonoids	20	pos_149 pos_1193 pos_203 pos_1289 pos_656 pos_936 pos_16 pos_173 pos_2670 pos_1763 pos_1500 pos_2493 pos_387 pos_648 pos_2830 pos_1687 pos_117 pos_2279 pos_276 pos_1831
Phenylpropanoids and polyketides	Cinnamaldehydes	19	pos_149 pos_1193 pos_203 pos_1289 pos_936 pos_16 pos_173 pos_2670 pos_1763 pos_1500 pos_2493 pos_387 pos_648 pos_2830 pos_1687 pos_117 pos_2279 pos_276 pos_1831
Phenylpropanoids and polyketides	Cinnamic acids and derivatives	9	pos_149 pos_387 pos_16 pos_1193 pos_2493 pos_1687 pos_1289 pos_1500 pos_117
Phenylpropanoids and polyketides	Coumarins and derivatives	7	pos_149 pos_387 pos_1193 pos_2493 pos_1289 pos_1500 pos_117
Phenylpropanoids and polyketides	Flavonoids	14	pos_149 pos_936 pos_387 pos_16 pos_1193 pos_2493 pos_1687 pos_1763 pos_1831 pos_1289 pos_1500 pos_203 pos_173 pos_117
Phenylpropanoids and polyketides	Isoflavonoids	3	pos_1289 pos_1193 pos_117
Phenylpropanoids and polyketides	Linear 1,3-diarylpropanoids	1	pos_117
Phenylpropanoids and polyketides	Macrolactams	16	pos_149 pos_936 pos_387 pos_16 pos_2670 pos_2279 pos_1193 pos_2493 pos_1687 pos_1763 pos_1831 pos_1289 pos_1500 pos_203 pos_173 pos_117
Phenylpropanoids and polyketides	Macrolides and analogues	18	pos_149 pos_936 pos_387 pos_16 pos_2670 pos_2279 pos_1193 pos_2493 pos_1687 pos_1763 pos_1831 pos_1289 pos_1500 pos_203 pos_276 pos_2830 pos_173 pos_117
Phenylpropanoids and polyketides	Phenylpropanoic acids	15	pos_149 pos_936 pos_387 pos_16 pos_2279 pos_1193 pos_2493 pos_1687 pos_1763 pos_1831 pos_1289 pos_1500 pos_203 pos_173 pos_117
Phenylpropanoids and polyketides	Stilbenes	4	pos_1289 pos_1193 pos_149 pos_117
Phenylpropanoids and polyketides	oids	10	pos_149 pos_387 pos_16 pos_1193 pos_2493 pos_1687 pos_1289 pos_1500 pos_173 pos_117
