# Supplementary material for: Multi-omics analyses reveal that the gut microbiome and its metabolites promote milk fat synthesis in Zhongdian yak cows
Source: PeerJ journal article supplement (doi:10.7717/peerj.14444), 2022-12-02
Supplement: biomarker_Web_Report_.zip [file meta_kegg_anno.xls]

#ID	name	KEGG_annotation	KEGG_pathway_annotation
pos_1	d-erythro-dihydrosphingosine	C00836	Sphingolipid metabolism(ko00600);;Sphingolipid signaling pathway(ko04071);;Metabolic pathways(ko01100)
pos_10	deoxycholic acid	C04483	Bile secretion(ko04976)
pos_1005	bovinic acid	C04056	Linoleic acid metabolism(ko00591)
pos_1007	pe(14:0/22:4(7z,10z,13z,16z))	C00350	Kaposi sarcoma-associated herpesvirus infection(ko05167);;Glycerophospholipid metabolism(ko00564);;Autophagy - animal(ko04140);;Glycosylphosphatidylinositol (GPI)-anchor biosynthesis(ko00563);;Pathogenic Escherichia coli infection(ko05130);;Retrograde endocannabinoid signaling(ko04723);;Metabolic pathways(ko01100);;Autophagy - other(ko04136)
pos_101	8z,11z,14z-heptadecatrienal	C16343	alpha-Linolenic acid metabolism(ko00592)
pos_1018	pc(22:2(13z,16z)/22:5(7z,10z,13z,16z,19z))	C00157	Retrograde endocannabinoid signaling(ko04723);;Choline metabolism in cancer(ko05231);;alpha-Linolenic acid metabolism(ko00592);;Metabolic pathways(ko01100);;Glycerophospholipid metabolism(ko00564);;Linoleic acid metabolism(ko00591);;Arachidonic acid metabolism(ko00590)
pos_1019	20-hydroxy-leukotriene b4	C04853	Arachidonic acid metabolism(ko00590)
pos_1022	nicotinate d-ribonucleoside	C05841	Metabolic pathways(ko01100);;Nicotinate and nicotinamide metabolism(ko00760)
pos_1025	deoxyadenosine	C00212	Purine metabolism(ko00230);;Metabolic pathways(ko01100);;Alcoholism(ko05034);;Parkinson disease(ko05012);;Regulation of lipolysis in adipocytes(ko04923);;Neuroactive ligand-receptor interaction(ko04080);;cGMP-PKG signaling pathway(ko04022);;Renin secretion(ko04924);;Sphingolipid signaling pathway(ko04071);;cAMP signaling pathway(ko04024);;ABC transporters(ko02010);;Morphine addiction(ko05032);;Va…
pos_1027	2-oxoarginine	C03771	Metabolic pathways(ko01100);;Arginine and proline metabolism(ko00330);;D-Arginine and D-ornithine metabolism(ko00472)
pos_1044	l-leucine	C00123	Central carbon metabolism in cancer(ko05230);;Shigellosis(ko05131);;mTOR signaling pathway(ko04150);;Biosynthesis of amino acids(ko01230);;Protein digestion and absorption(ko04974);;Metabolic pathways(ko01100);;2-Oxocarboxylic acid metabolism(ko01210);;Valine, leucine and isoleucine degradation(ko00280);;ABC transporters(ko02010);;Aminoacyl-tRNA biosynthesis(ko00970);;Mineral absorption(ko04978);…
pos_1048	l-threonine	C00188	Glycine, serine and threonine metabolism(ko00260);;Valine, leucine and isoleucine biosynthesis(ko00290);;Mineral absorption(ko04978);;ABC transporters(ko02010);;Porphyrin and chlorophyll metabolism(ko00860);;Aminoacyl-tRNA biosynthesis(ko00970);;Protein digestion and absorption(ko04974);;Metabolic pathways(ko01100);;Biosynthesis of amino acids(ko01230);;Monobactam biosynthesis(ko00261)
pos_1050	brassinolide	C08814	Metabolic pathways(ko01100)
pos_1054	farnesylcysteine	C19691	Terpenoid backbone biosynthesis(ko00900)
pos_1087	galactosylglycerol	C05401	Glycerolipid metabolism(ko00561);;Galactose metabolism(ko00052)
pos_1110	6-keto-prostaglandin f1a	C05961	Metabolic pathways(ko01100);;Arachidonic acid metabolism(ko00590)
pos_112	hyacinthin	C00601	Phenylalanine metabolism(ko00360);;Metabolic pathways(ko01100)
pos_1129	octanoylglucuronide	C03033	Bile secretion(ko04976);;Pentose and glucuronate interconversions(ko00040);;Metabolic pathways(ko01100)
pos_1148	corticosterone	C02140	Steroid hormone biosynthesis(ko00140);;Regulation of lipolysis in adipocytes(ko04923);;Aldosterone synthesis and secretion(ko04925);;Prion disease(ko05020);;Metabolic pathways(ko01100)
pos_1165	estradiol	C00951	Endocrine resistance(ko01522);;GnRH secretion(ko04929);;Steroid hormone biosynthesis(ko00140);;Breast cancer(ko05224);;Endocrine and other factor-regulated calcium reabsorption(ko04961);;Estrogen signaling pathway(ko04915);;Prostate cancer(ko05215);;Thermogenesis(ko04714);;Metabolic pathways(ko01100);;Prolactin signaling pathway(ko04917);;Ovarian steroidogenesis(ko04913);;Pathways in cancer(ko052…
pos_1169	testosterone	C00535	Steroid hormone biosynthesis(ko00140);;Ovarian steroidogenesis(ko04913);;Pathways in cancer(ko05200);;Prostate cancer(ko05215);;Endocrine resistance(ko01522);;GnRH secretion(ko04929);;Metabolic pathways(ko01100)
pos_1181	4-chlorocatechol	C02375	Metabolic pathways(ko01100)
pos_1195	3-succinoylpyridine	C19569	Chemical carcinogenesis(ko05204);;Metabolism of xenobiotics by cytochrome P450(ko00980);;Nicotinate and nicotinamide metabolism(ko00760);;Metabolic pathways(ko01100)
pos_12	hypoxanthine	C00262	Purine metabolism(ko00230);;Metabolic pathways(ko01100)
pos_1204	androsterone	C00523	Steroid hormone biosynthesis(ko00140)
pos_1241	acarbose	C06802	Metabolic pathways(ko01100)
pos_1252	docosahexaenoic acid	C06429	Biosynthesis of unsaturated fatty acids(ko01040)
pos_126	4-coumaroylshikimate	C02947	Metabolic pathways(ko01100)
pos_1260	vitamin a2	C21797	Retinol metabolism(ko00830)
pos_1264	1-methylhistidine	C01152	Metabolic pathways(ko01100);;Histidine metabolism(ko00340)
pos_1267	l-histidine	C00135	Histidine metabolism(ko00340);;beta-Alanine metabolism(ko00410);;Aminoacyl-tRNA biosynthesis(ko00970);;ABC transporters(ko02010);;Metabolic pathways(ko01100);;Protein digestion and absorption(ko04974);;Biosynthesis of amino acids(ko01230);;Central carbon metabolism in cancer(ko05230)
pos_1275	l-histidinol	C00860	Histidine metabolism(ko00340);;Metabolic pathways(ko01100);;Biosynthesis of amino acids(ko01230)
pos_1282	dolichyl diphosphate	C00621	N-Glycan biosynthesis(ko00510);;Metabolic pathways(ko01100)
pos_1286	l-urobilinogen	C05789	Porphyrin and chlorophyll metabolism(ko00860)
pos_13	guanosine	C00387	Metabolic pathways(ko01100);;Purine metabolism(ko00230);;ABC transporters(ko02010)
pos_1315	isopropylmaleate	C02631	2-Oxocarboxylic acid metabolism(ko01210);;Valine, leucine and isoleucine biosynthesis(ko00290)
pos_1355	stearic acid	C01530	Phototransduction - fly(ko04745);;Biosynthesis of unsaturated fatty acids(ko01040);;Fatty acid biosynthesis(ko00061)
pos_1362	sparfloxacin	C07662	ABC transporters(ko02010)
pos_1370	fmnh2	C01847	Metabolic pathways(ko01100);;Riboflavin metabolism(ko00740)
pos_1383	3-hexaprenyl-4-hydroxybenzoic acid	C13425	Ubiquinone and other terpenoid-quinone biosynthesis(ko00130)
pos_14	decanoic acid	C01571	Metabolic pathways(ko01100);;Fatty acid biosynthesis(ko00061)
pos_1407	21-deoxycortisol	C05497	Steroid hormone biosynthesis(ko00140)
pos_1422	ciprofloxacin	C05349	ABC transporters(ko02010)
pos_1430	pc(20:4(5z,8z,11z,14z)/18:0)	C00157	Arachidonic acid metabolism(ko00590);;Linoleic acid metabolism(ko00591);;Glycerophospholipid metabolism(ko00564);;Metabolic pathways(ko01100);;alpha-Linolenic acid metabolism(ko00592);;Choline metabolism in cancer(ko05231);;Retrograde endocannabinoid signaling(ko04723)
pos_1442	dg(16:0/18:1(11z)/0:0)	C00165	Th17 cell differentiation(ko04659);;Regulation of lipolysis in adipocytes(ko04923);;Thyroid hormone signaling pathway(ko04919);;Axon regeneration(ko04361);;Th1 and Th2 cell differentiation(ko04658);;Relaxin signaling pathway(ko04926);;Gastric acid secretion(ko04971);;Insulin resistance(ko04931);;Pathways in cancer(ko05200);;Neurotrophin signaling pathway(ko04722);;Phospholipase D signaling pathwa…
pos_15	guanine	C00242	Purine metabolism(ko00230);;Metabolic pathways(ko01100)
pos_1517	dethiobiotin	C01909	Metabolic pathways(ko01100);;Biotin metabolism(ko00780)
pos_152	biliverdin ix	C00500	Porphyrin and chlorophyll metabolism(ko00860);;Metabolic pathways(ko01100)
pos_1539	alpha-fluoro-beta-ureidopropionic acid	C16631	Drug metabolism - other enzymes(ko00983)
pos_1541	tryptophanol	C00955	Tryptophan metabolism(ko00380)
pos_1569	propoxyphene	C07481	Caffeine metabolism(ko00232);;Metabolic pathways(ko01100)
pos_1573	nicotinuric acid	C05380	Nicotinate and nicotinamide metabolism(ko00760)
pos_16	rosmarinic acid	C01850	Metabolic pathways(ko01100);;Tyrosine metabolism(ko00350)
pos_1607	naringenin	C00509	Metabolic pathways(ko01100)
pos_161	17-hydroxylinolenic acid	C16346	alpha-Linolenic acid metabolism(ko00592)
pos_1619	lysopc(20:0)	C04230	Glycerophospholipid metabolism(ko00564);;Choline metabolism in cancer(ko05231)
pos_1652	(7z,10z,13z,16z)-docosatetraenoate	C16527	Biosynthesis of unsaturated fatty acids(ko01040);;Ferroptosis(ko04216)
pos_1674	(3s)-3,6-diaminohexanoate	C01142	Lysine degradation(ko00310);;Metabolic pathways(ko01100)
pos_1675	3-sulfinato-l-alaninate	C00606	Cysteine and methionine metabolism(ko00270);;Taurine and hypotaurine metabolism(ko00430);;Metabolic pathways(ko01100)
pos_1697	moxifloxacin	C07663	ABC transporters(ko02010)
pos_1705	11,14,17-eicosatrienoic acid	C16522	Biosynthesis of unsaturated fatty acids(ko01040)
pos_1709	sm(d18:1/18:1(11z))	C00550	Metabolic pathways(ko01100);;Sphingolipid signaling pathway(ko04071);;Sphingolipid metabolism(ko00600);;Necroptosis(ko04217)
pos_1714	arachidonic acid	C00219	Ferroptosis(ko04216);;Inflammatory mediator regulation of TRP channels(ko04750);;Linoleic acid metabolism(ko00591);;Ovarian steroidogenesis(ko04913);;Retrograde endocannabinoid signaling(ko04723);;Platelet activation(ko04611);;Fc gamma R-mediated phagocytosis(ko04666);;Arachidonic acid metabolism(ko00590);;Amoebiasis(ko05146);;Necroptosis(ko04217);;Phototransduction - fly(ko04745);;Leishmaniasis(…
pos_1717	2-isopropylmalic acid	C02504	2-Oxocarboxylic acid metabolism(ko01210);;Biosynthesis of amino acids(ko01230);;Pyruvate metabolism(ko00620);;Metabolic pathways(ko01100);;Valine, leucine and isoleucine biosynthesis(ko00290)
pos_1740	thiamine monophosphate	C01081	Thiamine metabolism(ko00730);;Metabolic pathways(ko01100)
pos_1745	cysteamine	C01678	Metabolic pathways(ko01100);;Taurine and hypotaurine metabolism(ko00430)
pos_1746	streptomycin	C00413	Metabolic pathways(ko01100)
pos_1752	alpha-tocotrienol	C14153	Ubiquinone and other terpenoid-quinone biosynthesis(ko00130);;Metabolic pathways(ko01100)
pos_1783	farnesyl pyrophosphate	C00448	Metabolic pathways(ko01100);;Steroid biosynthesis(ko00100);;Terpenoid backbone biosynthesis(ko00900);;Insect hormone biosynthesis(ko00981)
pos_18	l-homocystine	C01817	Cysteine and methionine metabolism(ko00270)
pos_1806	pc(22:5(4z,7z,10z,13z,16z)/24:1(15z))	C00157	Glycerophospholipid metabolism(ko00564);;Metabolic pathways(ko01100);;alpha-Linolenic acid metabolism(ko00592);;Choline metabolism in cancer(ko05231);;Retrograde endocannabinoid signaling(ko04723);;Arachidonic acid metabolism(ko00590);;Linoleic acid metabolism(ko00591)
pos_181	1-nitronaphthalene	C14040	Metabolism of xenobiotics by cytochrome P450(ko00980)
pos_1810	deoxyadenosine monophosphate	C00360	Metabolic pathways(ko01100);;Purine metabolism(ko00230)
pos_1817	3,4-dihydroxymandelic acid	C05580	Metabolic pathways(ko01100);;Tyrosine metabolism(ko00350)
pos_1833	pc(22:5(4z,7z,10z,13z,16z)/22:6(4z,7z,10z,13z,16z,19z))	C00157	Linoleic acid metabolism(ko00591);;Arachidonic acid metabolism(ko00590);;Metabolic pathways(ko01100);;Glycerophospholipid metabolism(ko00564);;Retrograde endocannabinoid signaling(ko04723);;Choline metabolism in cancer(ko05231);;alpha-Linolenic acid metabolism(ko00592)
pos_1835	calcidiol	C01561	Parathyroid hormone synthesis, secretion and action(ko04928);;Metabolic pathways(ko01100);;Steroid biosynthesis(ko00100);;Tuberculosis(ko05152)
pos_1844	vitamin k1	C02059	Ubiquinone and other terpenoid-quinone biosynthesis(ko00130);;Metabolic pathways(ko01100);;Vitamin digestion and absorption(ko04977)
pos_1860	dgdp	C00361	Purine metabolism(ko00230);;Metabolic pathways(ko01100)
pos_1898	ps(18:0/20:0)	C02737	Amoebiasis(ko05146);;Leishmaniasis(ko05140);;Glycine, serine and threonine metabolism(ko00260);;Metabolic pathways(ko01100);;Systemic lupus erythematosus(ko05322);;Glycerophospholipid metabolism(ko00564)
pos_1899	ergothioneine	C05570	Metabolic pathways(ko01100);;Histidine metabolism(ko00340)
pos_19	cellobiose	C00185	Starch and sucrose metabolism(ko00500);;Metabolic pathways(ko01100);;ABC transporters(ko02010)
pos_1904	linoleic acid	C01595	Biosynthesis of unsaturated fatty acids(ko01040);;Metabolic pathways(ko01100);;Linoleic acid metabolism(ko00591)
pos_1955	hippuric acid	C01586	Metabolic pathways(ko01100);;Phenylalanine metabolism(ko00360)
pos_1980	9(s)-hpode	C14827	Linoleic acid metabolism(ko00591);;Metabolic pathways(ko01100)
pos_1982	prostaglandin e2	C00584	Inflammatory mediator regulation of TRP channels(ko04750);;Leishmaniasis(ko05140);;Regulation of lipolysis in adipocytes(ko04923);;Neuroactive ligand-receptor interaction(ko04080);;cAMP signaling pathway(ko04024);;Arachidonic acid metabolism(ko00590);;Amoebiasis(ko05146);;Rheumatoid arthritis(ko05323);;Bile secretion(ko04976);;C-type lectin receptor signaling pathway(ko04625);;Metabolic pathways(…
pos_1986	dihydrobiopterin	C02953	Folate biosynthesis(ko00790);;Metabolic pathways(ko01100)
pos_2	betaine	C00719	ABC transporters(ko02010);;Metabolic pathways(ko01100);;Glycine, serine and threonine metabolism(ko00260)
pos_2008	2,2-dichloro-1,1-ethanediol	C14860	Metabolism of xenobiotics by cytochrome P450(ko00980)
pos_2048	phenylacetaldehyde	C00601	Phenylalanine metabolism(ko00360);;Metabolic pathways(ko01100)
pos_2054	desmosterol	C01802	Metabolic pathways(ko01100);;Steroid biosynthesis(ko00100)
pos_2062	piperidine	C01746	Protein digestion and absorption(ko04974)
pos_2072	2-hydroxyestradiol	C05301	Steroid hormone biosynthesis(ko00140);;Ovarian steroidogenesis(ko04913)
pos_2105	glycine	C00037	Phosphonate and phosphinate metabolism(ko00440);;Primary bile acid biosynthesis(ko00120);;Lysine degradation(ko00310);;Biosynthesis of amino acids(ko01230);;Metabolic pathways(ko01100);;Glyoxylate and dicarboxylate metabolism(ko00630);;Thiamine metabolism(ko00730);;Mineral absorption(ko04978);;Central carbon metabolism in cancer(ko05230);;Purine metabolism(ko00230);;Protein digestion and absorpti…
pos_212	cytidine	C00475	Metabolic pathways(ko01100);;Pyrimidine metabolism(ko00240);;ABC transporters(ko02010)
pos_2135	aldosterone 18-glucuronide	C03033	Bile secretion(ko04976)
pos_2166	prostaglandin a2	C05953	Metabolic pathways(ko01100);;Serotonergic synapse(ko04726);;Arachidonic acid metabolism(ko00590)
pos_2191	glycinexylidide	C16569	Drug metabolism - cytochrome P450(ko00982)
pos_220	retinaldehyde	C00376	Retinol metabolism(ko00830);;Phototransduction(ko04744);;Metabolic pathways(ko01100);;Vitamin digestion and absorption(ko04977)
pos_2204	diethanolamine	C06772	Glycerophospholipid metabolism(ko00564)
pos_2218	bilirubin diglucuronide	C05787	Metabolic pathways(ko01100);;Porphyrin and chlorophyll metabolism(ko00860)
pos_2263	lysopc(20:2(11z,14z))	C04230	Glycerophospholipid metabolism(ko00564);;Choline metabolism in cancer(ko05231)
pos_2274	n-acetylornithine	C00437	Arginine biosynthesis(ko00220);;Metabolic pathways(ko01100);;Biosynthesis of amino acids(ko01230);;2-Oxocarboxylic acid metabolism(ko01210)
pos_2279	hydrocinnamic acid	C05629	Metabolic pathways(ko01100);;Phenylalanine metabolism(ko00360)
pos_2283	citalopram aldehyde	C16612	Drug metabolism - cytochrome P450(ko00982)
pos_2328	guanosine 3'-diphosphate 5'-triphosphate	C04494	Purine metabolism(ko00230);;Metabolic pathways(ko01100)
pos_2330	7,8-dihydro-7-hydroxy-8-s-glutathionyl-benzo[a]pyrene	C14856	Chemical carcinogenesis(ko05204);;Metabolism of xenobiotics by cytochrome P450(ko00980)
pos_2406	p1,p4-bis(5'-uridyl) tetraphosphate	C06198	Metabolic pathways(ko01100);;Pyrimidine metabolism(ko00240)
pos_2409	cdp-glucose	C00501	Amino sugar and nucleotide sugar metabolism(ko00520);;Metabolic pathways(ko01100);;Starch and sucrose metabolism(ko00500)
pos_2413	5-hydroxyindoleacetaldehyde	C05634	Metabolic pathways(ko01100);;Tryptophan metabolism(ko00380)
pos_2433	2-methylpropyl glucosinolate	C17256	2-Oxocarboxylic acid metabolism(ko01210)
pos_2463	5-(3-pyridyl)-2-hydroxytetrahydrofuran	C19578	Metabolism of xenobiotics by cytochrome P450(ko00980);;Chemical carcinogenesis(ko05204)
pos_2465	2-propyl-2,4-pentadienoic acid	C16656	Drug metabolism - cytochrome P450(ko00982)
pos_2466	delta-tocopherol	C14151	Ubiquinone and other terpenoid-quinone biosynthesis(ko00130);;Metabolic pathways(ko01100)
pos_2493	aflatoxin b2	C16753	Metabolic pathways(ko01100)
pos_2509	1-nitro-5-hydroxy-6-glutathionyl-5,6-dihydronaphthalene	C14805	Metabolism of xenobiotics by cytochrome P450(ko00980)
pos_252	pseudaminic acid	C20082	Amino sugar and nucleotide sugar metabolism(ko00520);;Metabolic pathways(ko01100)
pos_2541	histidinal	C01929	Metabolic pathways(ko01100);;Histidine metabolism(ko00340)
pos_2548	n-methylserotonin	C06212	Tryptophan metabolism(ko00380)
pos_2567	carbamazepine	C06868	Drug metabolism - cytochrome P450(ko00982)
pos_2572	phenylacetic acid	C07086	Phenylalanine metabolism(ko00360);;Metabolic pathways(ko01100)
pos_2575	paromomycin	C00832	Neomycin, kanamycin and gentamicin biosynthesis(ko00524)
pos_2599	n-acetylglutamic acid	C00624	Metabolic pathways(ko01100);;Arginine biosynthesis(ko00220);;2-Oxocarboxylic acid metabolism(ko01210);;Biosynthesis of amino acids(ko01230)
pos_2601	nad	C00003	Thiamine metabolism(ko00730);;Thermogenesis(ko04714);;Aldosterone synthesis and secretion(ko04925);;Calcium signaling pathway(ko04020);;Metabolic pathways(ko01100);;Longevity regulating pathway(ko04211);;Drug metabolism - other enzymes(ko00983);;Nicotinate and nicotinamide metabolism(ko00760);;Vitamin digestion and absorption(ko04977);;AMPK signaling pathway(ko04152);;Longevity regulating pathway…
pos_2612	thiosulfate	C00320	Metabolic pathways(ko01100);;ABC transporters(ko02010);;Sulfur metabolism(ko00920)
pos_2634	6-[2,3-dihydroxy-1-(hydroxymethyl)propyl]-1,2-dihydro-7-hydroxy-9-methoxy-cyclopenta[c][1]benzopyran-3,4-dione	C19590	Metabolism of xenobiotics by cytochrome P450(ko00980)
pos_2649	chondroitin 4-sulfate	C00634	Malaria(ko05144);;Glycosaminoglycan degradation(ko00531);;Metabolic pathways(ko01100)
pos_267	m-xylene	C07208	Metabolic pathways(ko01100)
pos_2687	4-fumarylacetoacetic acid	C01061	Tyrosine metabolism(ko00350);;Metabolic pathways(ko01100)
pos_2717	dadp	C00206	Metabolic pathways(ko01100);;Purine metabolism(ko00230)
pos_272	geranylhydroquinone	C10793	Ubiquinone and other terpenoid-quinone biosynthesis(ko00130)
pos_2727	opc4-coa	C16335	Metabolic pathways(ko01100);;alpha-Linolenic acid metabolism(ko00592)
pos_2730	histamine	C00388	Fc epsilon RI signaling pathway(ko04664);;Gastric acid secretion(ko04971);;Histidine metabolism(ko00340);;Neuroactive ligand-receptor interaction(ko04080);;Asthma(ko05310);;Inflammatory mediator regulation of TRP channels(ko04750);;Synaptic vesicle cycle(ko04721);;Protein digestion and absorption(ko04974);;Metabolic pathways(ko01100)
pos_2731	2-dehydro-d-gluconate	C06473	Metabolic pathways(ko01100);;Pentose phosphate pathway(ko00030)
pos_2734	l-histidinol phosphate	C01100	Metabolic pathways(ko01100);;Histidine metabolism(ko00340);;Biosynthesis of amino acids(ko01230)
pos_2736	3-deoxy-d-manno-octulosonate 8-phosphate	C04478	Metabolic pathways(ko01100)
pos_2744	l-palmitoylcarnitine	C02990	Fatty acid degradation(ko00071);;Fatty acid metabolism(ko01212)
pos_2759	l-acetylcarnitine	C02571	Insulin resistance(ko04931)
pos_2768	n-(5-phospho-d-ribosyl)anthranilate	C04302	Biosynthesis of amino acids(ko01230);;Metabolic pathways(ko01100);;Phenylalanine, tyrosine and tryptophan biosynthesis(ko00400)
pos_2769	pc(16:1(9z)/0:0)	C04230	Glycerophospholipid metabolism(ko00564);;Choline metabolism in cancer(ko05231)
pos_2785	raffinose	C00492	ABC transporters(ko02010);;Galactose metabolism(ko00052);;Metabolic pathways(ko01100)
pos_2788	2-phenylethanol	C05853	Phenylalanine metabolism(ko00360)
pos_2792	2'-deoxycytidine	C00881	Metabolic pathways(ko01100);;Pyrimidine metabolism(ko00240);;ABC transporters(ko02010)
pos_2802	ubiquinone q1	C00399	Metabolic pathways(ko01100);;Ubiquinone and other terpenoid-quinone biosynthesis(ko00130);;Oxidative phosphorylation(ko00190)
pos_2805	udp-n-acetylmuramoyl-l-alanyl-d-gamma-glutamyl-meso-2,6-diaminopimelate	C04877	Metabolic pathways(ko01100);;Lysine biosynthesis(ko00300)
pos_2812	stearidonic acid	C16300	alpha-Linolenic acid metabolism(ko00592)
pos_2843	d-dethiobiotin	C01909	Biotin metabolism(ko00780);;Metabolic pathways(ko01100)
pos_2844	6-aminocaproic acid	C02378	Metabolic pathways(ko01100)
pos_2850	sinapyl alcohol	C02325	Metabolic pathways(ko01100)
pos_2853	alpha-tocotrienol	C14153	Ubiquinone and other terpenoid-quinone biosynthesis(ko00130);;Metabolic pathways(ko01100)
pos_2854	fexofenadine	C06999	Bile secretion(ko04976)
pos_3	cholic acid	C00695	Primary bile acid biosynthesis(ko00120);;Bile secretion(ko04976);;Metabolic pathways(ko01100)
pos_326	1-naphthol	C11714	Metabolism of xenobiotics by cytochrome P450(ko00980)
pos_331	pe(22:2(13z,16z)/18:4(6z,9z,12z,15z))	C00350	Autophagy - animal(ko04140);;Glycerophospholipid metabolism(ko00564);;Kaposi sarcoma-associated herpesvirus infection(ko05167);;Autophagy - other(ko04136);;Retrograde endocannabinoid signaling(ko04723);;Pathogenic Escherichia coli infection(ko05130);;Glycosylphosphatidylinositol (GPI)-anchor biosynthesis(ko00563);;Metabolic pathways(ko01100)
pos_34	p-cymene	C06575	Metabolic pathways(ko01100)
pos_36	phenol	C00146	Tyrosine metabolism(ko00350);;Metabolic pathways(ko01100);;Protein digestion and absorption(ko04974)
pos_362	capsaicin	C06866	Metabolic pathways(ko01100);;Inflammatory mediator regulation of TRP channels(ko04750)
pos_388	demethylphylloquinone	C13309	Metabolic pathways(ko01100);;Ubiquinone and other terpenoid-quinone biosynthesis(ko00130)
pos_39	choline	C00114	Bile secretion(ko04976);;ABC transporters(ko02010);;Metabolic pathways(ko01100);;Glycerophospholipid metabolism(ko00564);;Choline metabolism in cancer(ko05231);;Cholinergic synapse(ko04725);;Glycine, serine and threonine metabolism(ko00260)
pos_395	s-[2-(n7-guanyl)ethyl]-n-acetyl-l-cysteine	C14877	Metabolism of xenobiotics by cytochrome P450(ko00980)
pos_4	l-proline	C00148	Aminoacyl-tRNA biosynthesis(ko00970);;ABC transporters(ko02010);;Mineral absorption(ko04978);;Arginine and proline metabolism(ko00330);;Central carbon metabolism in cancer(ko05230);;Biosynthesis of amino acids(ko01230);;Metabolic pathways(ko01100);;Protein digestion and absorption(ko04974)
pos_404	9(s)-hete	C14779	Arachidonic acid metabolism(ko00590)
pos_431	ppa	C00254	Biosynthesis of amino acids(ko01230);;Phosphonate and phosphinate metabolism(ko00440);;Phenylalanine, tyrosine and tryptophan biosynthesis(ko00400);;Metabolic pathways(ko01100)
pos_457	2-oxosuberate	C16589	Metabolic pathways(ko01100);;2-Oxocarboxylic acid metabolism(ko01210)
pos_463	jasmonic acid	C08491	Metabolic pathways(ko01100);;alpha-Linolenic acid metabolism(ko00592)
pos_474	(3s,6e)-nerolidol	C09704	Metabolic pathways(ko01100)
pos_477	n-glycolylneuraminic acid	C03410	Amino sugar and nucleotide sugar metabolism(ko00520)
pos_478	caprylic acid	C06423	Lipoic acid metabolism(ko00785);;Fatty acid biosynthesis(ko00061);;Metabolic pathways(ko01100)
pos_486	biochanin a	C00814	Metabolic pathways(ko01100)
pos_492	phthalic acid	C01606	Metabolic pathways(ko01100);;ABC transporters(ko02010)
pos_499	oleic acid	C00712	Biosynthesis of unsaturated fatty acids(ko01040);;Longevity regulating pathway - worm(ko04212);;Fatty acid biosynthesis(ko00061)
pos_5	citric acid	C00158	Biosynthesis of amino acids(ko01230);;Central carbon metabolism in cancer(ko05230);;Taste transduction(ko04742);;Metabolic pathways(ko01100);;Alanine, aspartate and glutamate metabolism(ko00250);;Glyoxylate and dicarboxylate metabolism(ko00630);;Carbon metabolism(ko01200);;2-Oxocarboxylic acid metabolism(ko01210);;Glucagon signaling pathway(ko04922);;Citrate cycle (TCA cycle)(ko00020)
pos_507	androstanedione	C00674	Steroid hormone biosynthesis(ko00140)
pos_52	palmitoyl glucuronide	C03033	Bile secretion(ko04976);;Pentose and glucuronate interconversions(ko00040);;Metabolic pathways(ko01100)
pos_522	dihomo-linoleate (20:2n6)	C16525	Biosynthesis of unsaturated fatty acids(ko01040)
pos_529	5-aminopentanal	C12455	Lysine degradation(ko00310);;Metabolic pathways(ko01100)
pos_53	toluene	C01455	Metabolic pathways(ko01100)
pos_545	nadph	C00006	Aldosterone synthesis and secretion(ko04925);;Metabolic pathways(ko01100);;Thyroid hormone synthesis(ko04918);;Glutathione metabolism(ko00480);;Drug metabolism - other enzymes(ko00983);;Nicotinate and nicotinamide metabolism(ko00760)
pos_556	5-hydroxylysine	C16741	Metabolic pathways(ko01100);;Lysine degradation(ko00310)
pos_560	dodecanedioic acid	C16308	alpha-Linolenic acid metabolism(ko00592)
pos_564	5-hydroxyisourate	C11821	Metabolic pathways(ko01100);;Purine metabolism(ko00230)
pos_57	7-dehydrocholesterol	C05443	Rheumatoid arthritis(ko05323);;Insect hormone biosynthesis(ko00981);;Vitamin digestion and absorption(ko04977);;Steroid biosynthesis(ko00100);;Metabolic pathways(ko01100)
pos_577	prostaglandin j2	C05957	Metabolic pathways(ko01100);;Serotonergic synapse(ko04726);;Arachidonic acid metabolism(ko00590)
pos_597	heteroxanthin	C16353	Metabolic pathways(ko01100);;Caffeine metabolism(ko00232)
pos_602	2'-deoxyinosine triphosphate	C01345	Purine metabolism(ko00230)
pos_606	6-deoxocastasterone	C15802	Metabolic pathways(ko01100)
pos_607	11-dehydro-thromboxane b2	C05964	Serotonergic synapse(ko04726);;Arachidonic acid metabolism(ko00590);;Metabolic pathways(ko01100)
pos_61	5-aminoimidazole	C05239	Metabolic pathways(ko01100);;Purine metabolism(ko00230)
pos_614	fumaric acid	C00122	Citrate cycle (TCA cycle)(ko00020);;Arginine biosynthesis(ko00220);;Butanoate metabolism(ko00650);;Glucagon signaling pathway(ko04922);;Tyrosine metabolism(ko00350);;Renal cell carcinoma(ko05211);;Oxidative phosphorylation(ko00190);;Pyruvate metabolism(ko00620);;Carbon metabolism(ko01200);;Alanine, aspartate and glutamate metabolism(ko00250);;Metabolic pathways(ko01100);;Phenylalanine metabolism(…
pos_639	4-hydroxybenzoic acid	C00156	Ubiquinone and other terpenoid-quinone biosynthesis(ko00130);;Folate biosynthesis(ko00790);;Metabolic pathways(ko01100)
pos_65	o-xylene	C07212	Metabolic pathways(ko01100)
pos_650	4-hydroxyproline	C01157	ABC transporters(ko02010);;Arginine and proline metabolism(ko00330);;Metabolic pathways(ko01100)
pos_659	stearidonic acid	C16300	alpha-Linolenic acid metabolism(ko00592)
pos_662	all-trans-retinoic acid	C00777	Metabolic pathways(ko01100);;Pathways in cancer(ko05200);;Non-small cell lung cancer(ko05223);;Th17 cell differentiation(ko04659);;Gastric cancer(ko05226);;Retinol metabolism(ko00830);;Intestinal immune network for IgA production(ko04672);;Small cell lung cancer(ko05222)
pos_663	myristic acid	C06424	Metabolic pathways(ko01100);;Fatty acid biosynthesis(ko00061)
pos_671	l-methionine	C00073	Protein digestion and absorption(ko04974);;Metabolic pathways(ko01100);;Central carbon metabolism in cancer(ko05230);;Biosynthesis of amino acids(ko01230);;Mineral absorption(ko04978);;Antifolate resistance(ko01523);;2-Oxocarboxylic acid metabolism(ko01210);;Cysteine and methionine metabolism(ko00270);;Aminoacyl-tRNA biosynthesis(ko00970)
pos_683	linamarin	C01594	Metabolic pathways(ko01100)
pos_695	gamma-linolenic acid	C06426	Linoleic acid metabolism(ko00591);;Metabolic pathways(ko01100);;Biosynthesis of unsaturated fatty acids(ko01040)
pos_709	5-aminopentanoic acid	C00431	Lysine degradation(ko00310);;Arginine and proline metabolism(ko00330);;Metabolic pathways(ko01100)
pos_717	2-hydroxybutyric acid	C05984	Propanoate metabolism(ko00640)
pos_722	eicosenoic acid	C16526	Biosynthesis of unsaturated fatty acids(ko01040)
pos_723	leukotriene a4	C00909	Arachidonic acid metabolism(ko00590);;Serotonergic synapse(ko04726);;Metabolic pathways(ko01100)
pos_730	ce(22:6(4z,7z,10z,13z,16z,19z))	C02530	Fat digestion and absorption(ko04975);;Ovarian steroidogenesis(ko04913);;Bile secretion(ko04976);;Cholesterol metabolism(ko04979);;Steroid biosynthesis(ko00100);;Vitamin digestion and absorption(ko04977)
pos_735	abietinol	C11882	Metabolic pathways(ko01100)
pos_743	crustecdysone	C02633	Insect hormone biosynthesis(ko00981)
pos_75	(r)-4-phosphopantoate	C18911	Metabolic pathways(ko01100);;Pantothenate and CoA biosynthesis(ko00770)
pos_752	3-methoxy-4-hydroxyphenylglycol glucuronide	C03033	Pentose and glucuronate interconversions(ko00040);;Bile secretion(ko04976);;Metabolic pathways(ko01100)
pos_754	biocytin	C05552	Vitamin digestion and absorption(ko04977);;Biotin metabolism(ko00780);;Metabolic pathways(ko01100)
pos_759	5-l-glutamyl-l-alanine	C03740	Glutathione metabolism(ko00480);;Metabolic pathways(ko01100)
pos_766	l-arginine	C00062	Amoebiasis(ko05146);;Aminoacyl-tRNA biosynthesis(ko00970);;ABC transporters(ko02010);;Arginine and proline metabolism(ko00330);;Chagas disease(ko05142);;D-Arginine and D-ornithine metabolism(ko00472);;Arginine biosynthesis(ko00220);;Central carbon metabolism in cancer(ko05230);;Monobactam biosynthesis(ko00261);;mTOR signaling pathway(ko04150);;Biosynthesis of amino acids(ko01230);;Amyotrophic lat…
pos_784	4-imidazolone-5-propionic acid	C03680	Metabolic pathways(ko01100);;Histidine metabolism(ko00340)
pos_805	capric acid	C01571	Metabolic pathways(ko01100)
pos_806	norfloxacin	C06687	ABC transporters(ko02010)
pos_809	hexadecanedioic acid	C19615	Metabolic pathways(ko01100)
pos_813	phytosphingosine	C12144	Sphingolipid metabolism(ko00600);;Metabolic pathways(ko01100)
pos_816	imidazoleacetic acid ribotide	C04437	Histidine metabolism(ko00340)
pos_819	endomorphin-2	C15891	Neuroactive ligand-receptor interaction(ko04080)
pos_83	8z,11z,14z-heptadecatrienoic acid	C16344	alpha-Linolenic acid metabolism(ko00592)
pos_835	3-dehydroxycarnitine	C01181	Lysine degradation(ko00310);;ABC transporters(ko02010);;Metabolic pathways(ko01100)
pos_856	n-ethyl trans-2-cis-6-nonadienamide	C06551	Metabolic pathways(ko01100)
pos_862	l-lysine	C00047	2-Oxocarboxylic acid metabolism(ko01210);;ABC transporters(ko02010);;Aminoacyl-tRNA biosynthesis(ko00970);;Lysine degradation(ko00310);;Lysine biosynthesis(ko00300);;Biosynthesis of amino acids(ko01230);;Protein digestion and absorption(ko04974);;Metabolic pathways(ko01100);;Biotin metabolism(ko00780)
pos_869	benzene	C01407	Metabolic pathways(ko01100)
pos_871	chenodeoxycholic acid glycine conjugate	C05466	Cholesterol metabolism(ko04979)
pos_879	acetylcholine	C01996	Taste transduction(ko04742);;Pancreatic secretion(ko04972);;Regulation of actin cytoskeleton(ko04810);;Synaptic vesicle cycle(ko04721);;Cholinergic synapse(ko04725);;Salivary secretion(ko04970);;Nicotine addiction(ko05033);;Bile secretion(ko04976);;Gastric acid secretion(ko04971);;Insulin secretion(ko04911);;Neuroactive ligand-receptor interaction(ko04080);;Glycerophospholipid metabolism(ko00564)…
pos_884	anandamide	C11695	Inflammatory mediator regulation of TRP channels(ko04750);;Thermogenesis(ko04714);;Retrograde endocannabinoid signaling(ko04723);;Neuroactive ligand-receptor interaction(ko04080);;Axon regeneration(ko04361)
pos_9	retinoic acid	C00777	Metabolic pathways(ko01100);;Pathways in cancer(ko05200);;PPAR signaling pathway(ko03320);;Non-small cell lung cancer(ko05223);;Th17 cell differentiation(ko04659);;Adipocytokine signaling pathway(ko04920);;Gastric cancer(ko05226);;Intestinal immune network for IgA production(ko04672);;Retinol metabolism(ko00830);;Small cell lung cancer(ko05222)
pos_911	4-pyridoxic acid	C00847	Metabolic pathways(ko01100);;Vitamin B6 metabolism(ko00750)
pos_913	spermine	C00750	beta-Alanine metabolism(ko00410);;Arginine and proline metabolism(ko00330);;Metabolic pathways(ko01100);;Glutathione metabolism(ko00480);;Pantothenate and CoA biosynthesis(ko00770);;Bile secretion(ko04976)
pos_919	4-hydroxyandrostenedione glucuronide	C11455	Metabolic pathways(ko01100);;Steroid biosynthesis(ko00100)
pos_92	adenine	C00147	Purine metabolism(ko00230);;Metabolic pathways(ko01100)
pos_975	carnosine	C00386	Metabolic pathways(ko01100);;beta-Alanine metabolism(ko00410);;Histidine metabolism(ko00340)
pos_980	n-carbamoylputrescine	C00436	Metabolic pathways(ko01100);;Arginine and proline metabolism(ko00330)
