# Supplementary material for: Multi-omics analyses reveal that the gut microbiome and its metabolites promote milk fat synthesis in Zhongdian yak cows
Source: PeerJ journal article supplement (doi:10.7717/peerj.14444), 2022-12-02
Supplement: biomarker_Web_Report_.zip [file meta_kegg_anno_categroy.xls]

KO_Pathway_Level1	KO_Pathway_Level2	Meta_Num	Metabolites
Aging	04211 Longevity regulating pathway	1	pos_2601
Aging	04212 Longevity regulating pathway - worm	2	pos_2601 pos_499
Aging	04213 Longevity regulating pathway - multiple species	2	pos_2601 pos_499
Amino acid metabolism	00220 Arginine biosynthesis	23	pos_5 pos_1675 pos_1048 pos_2 pos_862 pos_39 pos_2805 pos_614 pos_1898 pos_2274 pos_835 pos_766 pos_709 pos_1044 pos_1315 pos_671 pos_1674 pos_556 pos_1717 pos_2105 pos_2599 pos_529 pos_18
Amino acid metabolism	00250 Alanine, aspartate and glutamate metabolism	2	pos_5 pos_614
Amino acid metabolism	00260 Glycine, serine and threonine metabolism	7	pos_2 pos_2105 pos_5 pos_39 pos_614 pos_1898 pos_1048
Amino acid metabolism	00270 Cysteine and methionine metabolism	10	pos_2 pos_2105 pos_5 pos_39 pos_1675 pos_18 pos_671 pos_614 pos_1898 pos_1048
Amino acid metabolism	00280 Valine, leucine and isoleucine degradation	11	pos_2 pos_2105 pos_5 pos_39 pos_1044 pos_1675 pos_18 pos_671 pos_614 pos_1898 pos_1048
Amino acid metabolism	00290 Valine, leucine and isoleucine biosynthesis	13	pos_2 pos_1717 pos_2105 pos_5 pos_39 pos_1044 pos_1315 pos_1675 pos_18 pos_671 pos_614 pos_1898 pos_1048
Amino acid metabolism	00300 Lysine biosynthesis	15	pos_2 pos_1717 pos_862 pos_2105 pos_5 pos_39 pos_2805 pos_1044 pos_1315 pos_1675 pos_18 pos_671 pos_614 pos_1898 pos_1048
Amino acid metabolism	00310 Lysine degradation	20	pos_5 pos_1675 pos_1048 pos_2 pos_862 pos_39 pos_2805 pos_614 pos_1898 pos_835 pos_709 pos_1044 pos_1315 pos_671 pos_1674 pos_556 pos_1717 pos_2105 pos_529 pos_18
Amino acid metabolism	00330 Arginine and proline metabolism	28	pos_5 pos_913 pos_1675 pos_1048 pos_2 pos_862 pos_39 pos_2805 pos_614 pos_1898 pos_2274 pos_835 pos_766 pos_1027 pos_709 pos_1044 pos_4 pos_1315 pos_671 pos_1674 pos_650 pos_556 pos_1717 pos_980 pos_2105 pos_2599 pos_529 pos_18
Amino acid metabolism	00340 Histidine metabolism	38	pos_816 pos_1267 pos_5 pos_913 pos_1675 pos_2730 pos_1899 pos_1048 pos_2 pos_862 pos_39 pos_2805 pos_975 pos_1264 pos_2541 pos_614 pos_1898 pos_2274 pos_835 pos_766 pos_1027 pos_709 pos_2734 pos_1044 pos_4 pos_1315 pos_671 pos_1674 pos_650 pos_556 pos_1717 pos_980 pos_2105 pos_784 pos_2599 pos_529 pos_18 pos_1275
Amino acid metabolism	00350 Tyrosine metabolism	42	pos_816 pos_1267 pos_5 pos_913 pos_1675 pos_2730 pos_1899 pos_1048 pos_2 pos_862 pos_2687 pos_16 pos_39 pos_2805 pos_975 pos_1817 pos_1264 pos_2541 pos_614 pos_1898 pos_2274 pos_835 pos_766 pos_1027 pos_709 pos_2734 pos_1044 pos_4 pos_1315 pos_671 pos_1674 pos_650 pos_556 pos_36 pos_1717 pos_980 pos_2105 pos_784 pos_2599 pos_529 pos_18 pos_1275
Amino acid metabolism	00360 Phenylalanine metabolism	48	pos_2572 pos_816 pos_1267 pos_5 pos_913 pos_1675 pos_2730 pos_1899 pos_1048 pos_2 pos_862 pos_2687 pos_16 pos_39 pos_2805 pos_975 pos_1817 pos_1264 pos_2541 pos_2048 pos_614 pos_1898 pos_2274 pos_835 pos_766 pos_1027 pos_709 pos_2734 pos_1044 pos_4 pos_1315 pos_671 pos_1674 pos_650 pos_556 pos_36 pos_1717 pos_980 pos_2105 pos_784 pos_2599 pos_529 pos_2788 pos_2279 pos_18 pos_1275 pos_1955 pos_112
Amino acid metabolism	00380 Tryptophan metabolism	51	pos_2572 pos_816 pos_1267 pos_5 pos_913 pos_1675 pos_2730 pos_1899 pos_1048 pos_2 pos_862 pos_2687 pos_16 pos_39 pos_2805 pos_975 pos_1817 pos_1264 pos_2541 pos_2048 pos_2413 pos_614 pos_1898 pos_2274 pos_835 pos_766 pos_1027 pos_709 pos_2734 pos_1044 pos_4 pos_1541 pos_1315 pos_671 pos_1674 pos_650 pos_556 pos_36 pos_1717 pos_980 pos_2105 pos_784 pos_2599 pos_529 pos_2788 pos_2279 pos_2548 pos_1…
Amino acid metabolism	00400 Phenylalanine, tyrosine and tryptophan biosynthesis	53	pos_2572 pos_816 pos_1267 pos_5 pos_913 pos_1675 pos_2730 pos_2768 pos_1899 pos_1048 pos_2 pos_862 pos_2687 pos_16 pos_39 pos_2805 pos_975 pos_1817 pos_1264 pos_2541 pos_2048 pos_2413 pos_614 pos_1898 pos_2274 pos_835 pos_766 pos_1027 pos_709 pos_2734 pos_431 pos_1044 pos_4 pos_1541 pos_1315 pos_671 pos_1674 pos_650 pos_556 pos_36 pos_1717 pos_980 pos_2105 pos_784 pos_2599 pos_529 pos_2788 pos_22…
Biosynthesis of other secondary metabolites	00232 Caffeine metabolism	2	pos_597 pos_1569
Biosynthesis of other secondary metabolites	00254 Aflatoxin biosynthesis	5	pos_766 pos_2575 pos_1569 pos_597 pos_1048
Biosynthesis of other secondary metabolites	00261 Monobactam biosynthesis	4	pos_597 pos_1569 pos_766 pos_1048
Biosynthesis of other secondary metabolites	00311 Penicillin and cephalosporin biosynthesis	2	pos_597 pos_1569
Biosynthesis of other secondary metabolites	00331 Clavulanic acid biosynthesis	4	pos_597 pos_1569 pos_766 pos_1048
Biosynthesis of other secondary metabolites	00332 Carbapenem biosynthesis	2	pos_597 pos_1569
Biosynthesis of other secondary metabolites	00333 Prodigiosin biosynthesis	5	pos_766 pos_2575 pos_1569 pos_597 pos_1048
Biosynthesis of other secondary metabolites	00401 Novobiocin biosynthesis	5	pos_766 pos_2575 pos_1569 pos_597 pos_1048
Biosynthesis of other secondary metabolites	00402 Benzoxazinoid biosynthesis	2	pos_597 pos_1569
Biosynthesis of other secondary metabolites	00404 Staurosporine biosynthesis	5	pos_766 pos_2575 pos_1569 pos_597 pos_1048
Biosynthesis of other secondary metabolites	00405 Phenazine biosynthesis	5	pos_766 pos_2575 pos_1569 pos_597 pos_1048
Biosynthesis of other secondary metabolites	00521 Streptomycin biosynthesis	4	pos_597 pos_1569 pos_766 pos_1048
Biosynthesis of other secondary metabolites	00524 Neomycin, kanamycin and gentamicin biosynthesis	5	pos_766 pos_2575 pos_1569 pos_597 pos_1048
Biosynthesis of other secondary metabolites	00525 Acarbose and validamycin biosynthesis	5	pos_766 pos_2575 pos_1569 pos_597 pos_1048
Biosynthesis of other secondary metabolites	00965 Betalain biosynthesis	2	pos_597 pos_1569
Biosynthesis of other secondary metabolites	00966 Glucosinolate biosynthesis	2	pos_597 pos_1569
Biosynthesis of other secondary metabolites	00997 Biosynthesis of various secondary metabolites - part 3	5	pos_766 pos_2575 pos_1569 pos_597 pos_1048
Biosynthesis of other secondary metabolites	00998 Biosynthesis of various secondary metabolites - part 2	5	pos_766 pos_2575 pos_1569 pos_597 pos_1048
Biosynthesis of other secondary metabolites	00999 Biosynthesis of various secondary metabolites - part 1	5	pos_766 pos_2575 pos_1569 pos_597 pos_1048
Cancer: overview	05200 Pathways in cancer	7	pos_1442 pos_662 pos_1982 pos_1165 pos_1169 pos_9 pos_614
Cancer: overview	05202 Transcriptional misregulation in cancer	7	pos_1442 pos_662 pos_1982 pos_1165 pos_1169 pos_9 pos_614
Cancer: overview	05203 Viral carcinogenesis	7	pos_1442 pos_662 pos_1982 pos_1165 pos_1169 pos_9 pos_614
Cancer: overview	05204 Chemical carcinogenesis - DNA adducts	7	pos_1442 pos_662 pos_1982 pos_1165 pos_1169 pos_9 pos_614
Cancer: overview	05205 Proteoglycans in cancer	7	pos_1442 pos_662 pos_1982 pos_1165 pos_1169 pos_9 pos_614
Cancer: overview	05206 MicroRNAs in cancer	7	pos_1442 pos_662 pos_1982 pos_1165 pos_1169 pos_9 pos_614
Cancer: overview	05207 Chemical carcinogenesis - receptor activation	7	pos_1442 pos_662 pos_1982 pos_1165 pos_1169 pos_9 pos_614
Cancer: overview	05230 Central carbon metabolism in cancer	14	pos_766 pos_2105 pos_1267 pos_1442 pos_5 pos_662 pos_1982 pos_1044 pos_4 pos_1165 pos_1169 pos_9 pos_671 pos_614
Cancer: overview	05231 Choline metabolism in cancer	22	pos_1267 pos_5 pos_1169 pos_39 pos_1982 pos_1833 pos_2769 pos_1806 pos_614 pos_766 pos_1044 pos_1430 pos_4 pos_9 pos_671 pos_1018 pos_2263 pos_2105 pos_1442 pos_662 pos_1165 pos_1619
Cancer: overview	05235 PD-L1 expression and PD-1 checkpoint pathway in cancer	22	pos_1267 pos_5 pos_1169 pos_39 pos_1982 pos_1833 pos_2769 pos_1806 pos_614 pos_766 pos_1044 pos_1430 pos_4 pos_9 pos_671 pos_1018 pos_2263 pos_2105 pos_1442 pos_662 pos_1165 pos_1619
Cancer: specific types	05211 Renal cell carcinoma	4	pos_1442 pos_662 pos_9 pos_614
Cancer: specific types	05213 Endometrial cancer	6	pos_1442 pos_662 pos_1165 pos_9 pos_1169 pos_614
Cancer: specific types	05214 Glioma	3	pos_1442 pos_662 pos_9
Cancer: specific types	05215 Prostate cancer	6	pos_1442 pos_662 pos_1165 pos_9 pos_1169 pos_614
Cancer: specific types	05216 Thyroid cancer	3	pos_1442 pos_662 pos_9
Cancer: specific types	05217 Basal cell carcinoma	3	pos_1442 pos_662 pos_9
Cancer: specific types	05218 Melanoma	3	pos_1442 pos_662 pos_9
Cancer: specific types	05219 Bladder cancer	4	pos_1442 pos_662 pos_9 pos_614
Cancer: specific types	05220 Chronic myeloid leukemia	3	pos_1442 pos_662 pos_9
Cancer: specific types	05221 Acute myeloid leukemia	3	pos_1442 pos_662 pos_9
Cancer: specific types	05222 Small cell lung cancer	6	pos_1442 pos_662 pos_1165 pos_9 pos_1169 pos_614
Cancer: specific types	05223 Non-small cell lung cancer	6	pos_1442 pos_662 pos_1165 pos_9 pos_1169 pos_614
Cancer: specific types	05224 Breast cancer	6	pos_1442 pos_662 pos_1165 pos_9 pos_1169 pos_614
Cancer: specific types	05225 Hepatocellular carcinoma	1	pos_1442
Cancer: specific types	05226 Gastric cancer	3	pos_1442 pos_662 pos_9
Carbohydrate metabolism	00020 Citrate cycle (TCA cycle)	2	pos_5 pos_614
Carbohydrate metabolism	00030 Pentose phosphate pathway	3	pos_5 pos_2731 pos_614
Carbohydrate metabolism	00040 Pentose and glucuronate interconversions	6	pos_5 pos_752 pos_2731 pos_52 pos_1129 pos_614
Carbohydrate metabolism	00051 Fructose and mannose metabolism	6	pos_5 pos_752 pos_2731 pos_52 pos_1129 pos_614
Carbohydrate metabolism	00052 Galactose metabolism	8	pos_5 pos_2785 pos_752 pos_2731 pos_52 pos_1129 pos_1087 pos_614
Carbohydrate metabolism	00053 Ascorbate and aldarate metabolism	8	pos_5 pos_2785 pos_752 pos_2731 pos_52 pos_1129 pos_1087 pos_614
Carbohydrate metabolism	00500 Starch and sucrose metabolism	10	pos_5 pos_2785 pos_2409 pos_752 pos_2731 pos_52 pos_1129 pos_1087 pos_19 pos_614
Carbohydrate metabolism	00520 Amino sugar and nucleotide sugar metabolism	12	pos_252 pos_5 pos_2785 pos_2409 pos_477 pos_752 pos_2731 pos_52 pos_1129 pos_1087 pos_19 pos_614
Carbohydrate metabolism	00562 Inositol phosphate metabolism	15	pos_1717 pos_2105 pos_252 pos_5 pos_2785 pos_2409 pos_477 pos_752 pos_2731 pos_52 pos_1129 pos_1087 pos_19 pos_614 pos_717
Carbohydrate metabolism	00620 Pyruvate metabolism	13	pos_1717 pos_252 pos_5 pos_2785 pos_2409 pos_477 pos_752 pos_2731 pos_52 pos_1129 pos_1087 pos_19 pos_614
Carbohydrate metabolism	00630 Glyoxylate and dicarboxylate metabolism	14	pos_1717 pos_2105 pos_252 pos_5 pos_2785 pos_2409 pos_477 pos_752 pos_2731 pos_52 pos_1129 pos_1087 pos_19 pos_614
Carbohydrate metabolism	00640 Propanoate metabolism	15	pos_1717 pos_2105 pos_252 pos_5 pos_2785 pos_2409 pos_477 pos_752 pos_2731 pos_52 pos_1129 pos_1087 pos_19 pos_614 pos_717
Carbohydrate metabolism	00650 Butanoate metabolism	15	pos_1717 pos_2105 pos_252 pos_5 pos_2785 pos_2409 pos_477 pos_752 pos_2731 pos_52 pos_1129 pos_1087 pos_19 pos_614 pos_717
Carbohydrate metabolism	00660 C5-Branched dibasic acid metabolism	15	pos_1717 pos_2105 pos_252 pos_5 pos_2785 pos_2409 pos_477 pos_752 pos_2731 pos_52 pos_1129 pos_1087 pos_19 pos_614 pos_717
Cell growth and death	04115 p53 signaling pathway	3	pos_1652 pos_1709 pos_1714
Cell growth and death	04216 Ferroptosis	2	pos_1652 pos_1714
Cell growth and death	04217 Necroptosis	3	pos_1652 pos_1709 pos_1714
Cell growth and death	04218 Cellular senescence	3	pos_1652 pos_1709 pos_1714
Cell motility	04810 Regulation of actin cytoskeleton	1	pos_879
Cellular community - eukaryotes	04540 Gap junction	1	pos_1442
Cellular community - eukaryotes	04550 Signaling pathways regulating pluripotency of stem cells	1	pos_1442
Circulatory system	04261 Adrenergic signaling in cardiomyocytes	1	pos_1442
Circulatory system	04270 Vascular smooth muscle contraction	3	pos_1442 pos_1025 pos_1714
Development and regeneration	04361 Axon regeneration	2	pos_1442 pos_884
Development and regeneration	04380 Osteoclast differentiation	2	pos_1442 pos_884
Digestive system	04970 Salivary secretion	2	pos_1442 pos_879
Digestive system	04971 Gastric acid secretion	3	pos_1442 pos_879 pos_2730
Digestive system	04972 Pancreatic secretion	3	pos_1442 pos_879 pos_2730
Digestive system	04973 Carbohydrate digestion and absorption	14	pos_2854 pos_2135 pos_10 pos_1442 pos_913 pos_39 pos_1982 pos_730 pos_752 pos_52 pos_1129 pos_3 pos_2730 pos_879
Digestive system	04974 Protein digestion and absorption	24	pos_10 pos_1267 pos_913 pos_52 pos_3 pos_2730 pos_879 pos_1048 pos_2854 pos_2135 pos_862 pos_39 pos_1982 pos_752 pos_766 pos_2062 pos_730 pos_1044 pos_4 pos_1129 pos_671 pos_36 pos_2105 pos_1442
Digestive system	04975 Fat digestion and absorption	24	pos_10 pos_1267 pos_913 pos_52 pos_3 pos_2730 pos_879 pos_1048 pos_2854 pos_2135 pos_862 pos_39 pos_1982 pos_752 pos_766 pos_2062 pos_730 pos_1044 pos_4 pos_1129 pos_671 pos_36 pos_2105 pos_1442
Digestive system	04976 Bile secretion	14	pos_2854 pos_2135 pos_10 pos_1442 pos_913 pos_39 pos_1982 pos_730 pos_752 pos_52 pos_1129 pos_3 pos_2730 pos_879
Digestive system	04977 Vitamin digestion and absorption	30	pos_10 pos_1267 pos_913 pos_52 pos_871 pos_3 pos_2601 pos_2730 pos_879 pos_1048 pos_2854 pos_2135 pos_862 pos_39 pos_1982 pos_752 pos_766 pos_2062 pos_730 pos_1044 pos_4 pos_1129 pos_1844 pos_671 pos_57 pos_220 pos_36 pos_2105 pos_1442 pos_754
Digestive system	04978 Mineral absorption	30	pos_10 pos_1267 pos_913 pos_52 pos_871 pos_3 pos_2601 pos_2730 pos_879 pos_1048 pos_2854 pos_2135 pos_862 pos_39 pos_1982 pos_752 pos_766 pos_2062 pos_730 pos_1044 pos_4 pos_1129 pos_1844 pos_671 pos_57 pos_220 pos_36 pos_2105 pos_1442 pos_754
Digestive system	04979 Cholesterol metabolism	25	pos_10 pos_1267 pos_913 pos_52 pos_871 pos_3 pos_2730 pos_879 pos_1048 pos_2854 pos_2135 pos_862 pos_39 pos_1982 pos_752 pos_766 pos_2062 pos_730 pos_1044 pos_4 pos_1129 pos_671 pos_36 pos_2105 pos_1442
Drug resistance: antineoplastic	01521 EGFR tyrosine kinase inhibitor resistance	1	pos_1442
Drug resistance: antineoplastic	01522 Endocrine resistance	4	pos_1442 pos_1165 pos_1169 pos_671
Drug resistance: antineoplastic	01523 Antifolate resistance	2	pos_1442 pos_671
Drug resistance: antineoplastic	01524 Platinum drug resistance	1	pos_1442
Endocrine and metabolic disease	04931 Insulin resistance	2	pos_1442 pos_2759
Endocrine and metabolic disease	04933 AGE-RAGE signaling pathway in diabetic complications	2	pos_1442 pos_2759
Endocrine and metabolic disease	04934 Cushing syndrome	2	pos_1442 pos_2759
Endocrine system	03320 PPAR signaling pathway	9	pos_1148 pos_1442 pos_5 pos_1982 pos_1025 pos_9 pos_879 pos_614 pos_1714
Endocrine system	04614 Renin-angiotensin system	15	pos_545 pos_1148 pos_1835 pos_1442 pos_5 pos_2072 pos_1982 pos_730 pos_1165 pos_1025 pos_9 pos_1169 pos_879 pos_614 pos_1714
Endocrine system	04910 Insulin signaling pathway	2	pos_1442 pos_879
Endocrine system	04911 Insulin secretion	2	pos_1442 pos_879
Endocrine system	04912 GnRH signaling pathway	11	pos_1148 pos_1442 pos_5 pos_1982 pos_1165 pos_1025 pos_9 pos_1169 pos_879 pos_614 pos_1714
Endocrine system	04913 Ovarian steroidogenesis	13	pos_1148 pos_1442 pos_5 pos_2072 pos_1982 pos_730 pos_1165 pos_1025 pos_9 pos_1169 pos_879 pos_614 pos_1714
Endocrine system	04914 Progesterone-mediated oocyte maturation	13	pos_1148 pos_1442 pos_5 pos_2072 pos_1982 pos_730 pos_1165 pos_1025 pos_9 pos_1169 pos_879 pos_614 pos_1714
Endocrine system	04915 Estrogen signaling pathway	13	pos_1148 pos_1442 pos_5 pos_2072 pos_1982 pos_730 pos_1165 pos_1025 pos_9 pos_1169 pos_879 pos_614 pos_1714
Endocrine system	04916 Melanogenesis	15	pos_545 pos_1148 pos_1835 pos_1442 pos_5 pos_2072 pos_1982 pos_730 pos_1165 pos_1025 pos_9 pos_1169 pos_879 pos_614 pos_1714
Endocrine system	04917 Prolactin signaling pathway	13	pos_1148 pos_1442 pos_5 pos_2072 pos_1982 pos_730 pos_1165 pos_1025 pos_9 pos_1169 pos_879 pos_614 pos_1714
Endocrine system	04918 Thyroid hormone synthesis	14	pos_545 pos_1148 pos_1442 pos_5 pos_2072 pos_1982 pos_730 pos_1165 pos_1025 pos_9 pos_1169 pos_879 pos_614 pos_1714
Endocrine system	04919 Thyroid hormone signaling pathway	14	pos_545 pos_1148 pos_1442 pos_5 pos_2072 pos_1982 pos_730 pos_1165 pos_1025 pos_9 pos_1169 pos_879 pos_614 pos_1714
Endocrine system	04920 Adipocytokine signaling pathway	9	pos_1148 pos_1442 pos_5 pos_1982 pos_1025 pos_9 pos_879 pos_614 pos_1714
Endocrine system	04921 Oxytocin signaling pathway	13	pos_1148 pos_1442 pos_5 pos_2072 pos_1982 pos_730 pos_1165 pos_1025 pos_9 pos_1169 pos_879 pos_614 pos_1714
Endocrine system	04922 Glucagon signaling pathway	4	pos_1442 pos_5 pos_879 pos_614
Endocrine system	04923 Regulation of lipolysis in adipocytes	8	pos_1148 pos_1442 pos_5 pos_1982 pos_1025 pos_879 pos_614 pos_1714
Endocrine system	04924 Renin secretion	15	pos_545 pos_1148 pos_1835 pos_1442 pos_5 pos_2072 pos_1982 pos_730 pos_1165 pos_1025 pos_9 pos_1169 pos_879 pos_614 pos_1714
Endocrine system	04925 Aldosterone synthesis and secretion	16	pos_545 pos_1148 pos_1835 pos_1442 pos_5 pos_2072 pos_1982 pos_730 pos_1165 pos_2601 pos_1025 pos_9 pos_1169 pos_879 pos_614 pos_1714
Endocrine system	04926 Relaxin signaling pathway	13	pos_1148 pos_1442 pos_5 pos_2072 pos_1982 pos_730 pos_1165 pos_1025 pos_9 pos_1169 pos_879 pos_614 pos_1714
Endocrine system	04927 Cortisol synthesis and secretion	16	pos_545 pos_1148 pos_1835 pos_1442 pos_5 pos_2072 pos_1982 pos_730 pos_1165 pos_2601 pos_1025 pos_9 pos_1169 pos_879 pos_614 pos_1714
Endocrine system	04928 Parathyroid hormone synthesis, secretion and action	15	pos_545 pos_1148 pos_1835 pos_1442 pos_5 pos_2072 pos_1982 pos_730 pos_1165 pos_1025 pos_9 pos_1169 pos_879 pos_614 pos_1714
Endocrine system	04929 GnRH secretion	11	pos_1148 pos_1442 pos_5 pos_1982 pos_1165 pos_1025 pos_9 pos_1169 pos_879 pos_614 pos_1714
Endocrine system	04935 Growth hormone synthesis, secretion and action	13	pos_1148 pos_1442 pos_5 pos_2072 pos_1982 pos_730 pos_1165 pos_1025 pos_9 pos_1169 pos_879 pos_614 pos_1714
Energy metabolism	00190 Oxidative phosphorylation	3	pos_2601 pos_2802 pos_614
Energy metabolism	00195 Photosynthesis	3	pos_2601 pos_2802 pos_614
Energy metabolism	00196 Photosynthesis - antenna proteins	3	pos_2601 pos_2802 pos_614
Energy metabolism	00680 Methane metabolism	3	pos_2601 pos_2802 pos_614
Energy metabolism	00710 Carbon fixation in photosynthetic organisms	3	pos_2601 pos_2802 pos_614
Energy metabolism	00720 Carbon fixation pathways in prokaryotes	3	pos_2601 pos_2802 pos_614
Energy metabolism	00910 Nitrogen metabolism	3	pos_2601 pos_2802 pos_614
Energy metabolism	00920 Sulfur metabolism	4	pos_2601 pos_2802 pos_614 pos_2612
Environmental adaptation	04626 Plant-pathogen interaction	4	pos_1442 pos_1165 pos_2601 pos_884
Environmental adaptation	04711 Circadian rhythm - fly	1	pos_1442
Environmental adaptation	04712 Circadian rhythm - plant	1	pos_1442
Environmental adaptation	04713 Circadian entrainment	1	pos_1442
Environmental adaptation	04714 Thermogenesis	4	pos_1442 pos_1165 pos_2601 pos_884
Excretory system	04961 Endocrine and other factor-regulated calcium reabsorption	2	pos_1442 pos_1165
Excretory system	04964 Proximal tubule bicarbonate reclamation	2	pos_1442 pos_1165
Excretory system	04966 Collecting duct acid secretion	2	pos_1442 pos_1165
Global and overview maps	01100 Metabolic pathways	159	pos_735 pos_2328 pos_2601 pos_3 pos_759 pos_663 pos_1899 pos_2 pos_486 pos_862 pos_2805 pos_1982 pos_1746 pos_2493 pos_2853 pos_709 pos_1044 pos_671 pos_1018 pos_1674 pos_564 pos_650 pos_1740 pos_577 pos_36 pos_1717 pos_1007 pos_1607 pos_639 pos_463 pos_2279 pos_13 pos_1165 pos_212 pos_1148 pos_809 pos_1267 pos_913 pos_1241 pos_856 pos_1675 pos_1050 pos_2730 pos_2768 pos_388 pos_2802 pos_1783 pos…
Global and overview maps	01110 Biosynthesis of secondary metabolites	159	pos_735 pos_2328 pos_2601 pos_3 pos_759 pos_663 pos_1899 pos_2 pos_486 pos_862 pos_2805 pos_1982 pos_1746 pos_2493 pos_2853 pos_709 pos_1044 pos_671 pos_1018 pos_1674 pos_564 pos_650 pos_1740 pos_577 pos_36 pos_1717 pos_1007 pos_1607 pos_639 pos_463 pos_2279 pos_13 pos_1165 pos_212 pos_1148 pos_809 pos_1267 pos_913 pos_1241 pos_856 pos_1675 pos_1050 pos_2730 pos_2768 pos_388 pos_2802 pos_1783 pos…
Global and overview maps	01120 Microbial metabolism in diverse environments	159	pos_735 pos_2328 pos_2601 pos_3 pos_759 pos_663 pos_1899 pos_2 pos_486 pos_862 pos_2805 pos_1982 pos_1746 pos_2493 pos_2853 pos_709 pos_1044 pos_671 pos_1018 pos_1674 pos_564 pos_650 pos_1740 pos_577 pos_36 pos_1717 pos_1007 pos_1607 pos_639 pos_463 pos_2279 pos_13 pos_1165 pos_212 pos_1148 pos_809 pos_1267 pos_913 pos_1241 pos_856 pos_1675 pos_1050 pos_2730 pos_2768 pos_388 pos_2802 pos_1783 pos…
Global and overview maps	01200 Carbon metabolism	159	pos_735 pos_2328 pos_2601 pos_3 pos_759 pos_663 pos_1899 pos_2 pos_486 pos_862 pos_2805 pos_1982 pos_1746 pos_2493 pos_2853 pos_709 pos_1044 pos_671 pos_1018 pos_1674 pos_564 pos_650 pos_1740 pos_577 pos_36 pos_1717 pos_1007 pos_1607 pos_639 pos_463 pos_2279 pos_13 pos_1165 pos_212 pos_1148 pos_809 pos_1267 pos_913 pos_1241 pos_856 pos_1675 pos_1050 pos_2730 pos_2768 pos_388 pos_2802 pos_1783 pos…
Global and overview maps	01210 2-Oxocarboxylic acid metabolism	161	pos_735 pos_2328 pos_2601 pos_3 pos_759 pos_663 pos_1899 pos_2 pos_486 pos_862 pos_2433 pos_2805 pos_1982 pos_1746 pos_2493 pos_2853 pos_709 pos_1044 pos_671 pos_1018 pos_1674 pos_564 pos_650 pos_1740 pos_577 pos_36 pos_1717 pos_1007 pos_1607 pos_639 pos_463 pos_2279 pos_13 pos_1165 pos_212 pos_1148 pos_809 pos_1267 pos_913 pos_1241 pos_856 pos_1675 pos_1050 pos_2730 pos_2768 pos_388 pos_2802 pos…
Global and overview maps	01212 Fatty acid metabolism	162	pos_735 pos_2328 pos_2601 pos_3 pos_759 pos_663 pos_1899 pos_2 pos_486 pos_862 pos_2433 pos_2805 pos_1982 pos_1746 pos_2493 pos_2853 pos_2744 pos_709 pos_1044 pos_671 pos_1018 pos_1674 pos_564 pos_650 pos_1740 pos_577 pos_36 pos_1717 pos_1007 pos_1607 pos_639 pos_463 pos_2279 pos_13 pos_1165 pos_212 pos_1148 pos_809 pos_1267 pos_913 pos_1241 pos_856 pos_1675 pos_1050 pos_2730 pos_2768 pos_388 pos…
Global and overview maps	01220 Degradation of aromatic compounds	162	pos_735 pos_2328 pos_2601 pos_3 pos_759 pos_663 pos_1899 pos_2 pos_486 pos_862 pos_2433 pos_2805 pos_1982 pos_1746 pos_2493 pos_2853 pos_2744 pos_709 pos_1044 pos_671 pos_1018 pos_1674 pos_564 pos_650 pos_1740 pos_577 pos_36 pos_1717 pos_1007 pos_1607 pos_639 pos_463 pos_2279 pos_13 pos_1165 pos_212 pos_1148 pos_809 pos_1267 pos_913 pos_1241 pos_856 pos_1675 pos_1050 pos_2730 pos_2768 pos_388 pos…
Global and overview maps	01230 Biosynthesis of amino acids	162	pos_735 pos_2328 pos_2601 pos_3 pos_759 pos_663 pos_1899 pos_2 pos_486 pos_862 pos_2433 pos_2805 pos_1982 pos_1746 pos_2493 pos_2853 pos_2744 pos_709 pos_1044 pos_671 pos_1018 pos_1674 pos_564 pos_650 pos_1740 pos_577 pos_36 pos_1717 pos_1007 pos_1607 pos_639 pos_463 pos_2279 pos_13 pos_1165 pos_212 pos_1148 pos_809 pos_1267 pos_913 pos_1241 pos_856 pos_1675 pos_1050 pos_2730 pos_2768 pos_388 pos…
Global and overview maps	01240 Biosynthesis of cofactors	162	pos_735 pos_2328 pos_2601 pos_3 pos_759 pos_663 pos_1899 pos_2 pos_486 pos_862 pos_2433 pos_2805 pos_1982 pos_1746 pos_2493 pos_2853 pos_2744 pos_709 pos_1044 pos_671 pos_1018 pos_1674 pos_564 pos_650 pos_1740 pos_577 pos_36 pos_1717 pos_1007 pos_1607 pos_639 pos_463 pos_2279 pos_13 pos_1165 pos_212 pos_1148 pos_809 pos_1267 pos_913 pos_1241 pos_856 pos_1675 pos_1050 pos_2730 pos_2768 pos_388 pos…
Glycan biosynthesis and metabolism	00510 N-Glycan biosynthesis	1	pos_1282
Glycan biosynthesis and metabolism	00511 Other glycan degradation	4	pos_1282 pos_1007 pos_331 pos_2649
Glycan biosynthesis and metabolism	00512 Mucin type O-glycan biosynthesis	1	pos_1282
Glycan biosynthesis and metabolism	00513 Various types of N-glycan biosynthesis	1	pos_1282
Glycan biosynthesis and metabolism	00514 Other types of O-glycan biosynthesis	1	pos_1282
Glycan biosynthesis and metabolism	00515 Mannose type O-glycan biosynthesis	1	pos_1282
Glycan biosynthesis and metabolism	00531 Glycosaminoglycan degradation	2	pos_1282 pos_2649
Glycan biosynthesis and metabolism	00532 Glycosaminoglycan biosynthesis - chondroitin sulfate / dermatan sulfate	1	pos_1282
Glycan biosynthesis and metabolism	00533 Glycosaminoglycan biosynthesis - keratan sulfate	1	pos_1282
Glycan biosynthesis and metabolism	00534 Glycosaminoglycan biosynthesis - heparan sulfate / heparin	1	pos_1282
Glycan biosynthesis and metabolism	00540 Lipopolysaccharide biosynthesis	4	pos_1282 pos_1007 pos_331 pos_2649
Glycan biosynthesis and metabolism	00541 O-Antigen nucleotide sugar biosynthesis	4	pos_1282 pos_1007 pos_331 pos_2649
Glycan biosynthesis and metabolism	00542 O-Antigen repeat unit biosynthesis	4	pos_1282 pos_1007 pos_331 pos_2649
Glycan biosynthesis and metabolism	00550 Peptidoglycan biosynthesis	4	pos_1282 pos_1007 pos_331 pos_2649
Glycan biosynthesis and metabolism	00563 Glycosylphosphatidylinositol (GPI)-anchor biosynthesis	4	pos_1282 pos_1007 pos_331 pos_2649
Glycan biosynthesis and metabolism	00571 Lipoarabinomannan (LAM) biosynthesis	4	pos_1282 pos_1007 pos_331 pos_2649
Glycan biosynthesis and metabolism	00572 Arabinogalactan biosynthesis - Mycobacterium	4	pos_1282 pos_1007 pos_331 pos_2649
Glycan biosynthesis and metabolism	00601 Glycosphingolipid biosynthesis - lacto and neolacto series	4	pos_1282 pos_1007 pos_331 pos_2649
Glycan biosynthesis and metabolism	00603 Glycosphingolipid biosynthesis - globo and isoglobo series	4	pos_1282 pos_1007 pos_331 pos_2649
Glycan biosynthesis and metabolism	00604 Glycosphingolipid biosynthesis - ganglio series	4	pos_1282 pos_1007 pos_331 pos_2649
Immune disease	05310 Asthma	1	pos_2730
Immune disease	05320 Autoimmune thyroid disease	4	pos_2730 pos_57 pos_1982 pos_1898
Immune disease	05321 Inflammatory bowel disease	4	pos_2730 pos_57 pos_1982 pos_1898
Immune disease	05322 Systemic lupus erythematosus	2	pos_2730 pos_1898
Immune disease	05323 Rheumatoid arthritis	4	pos_2730 pos_57 pos_1982 pos_1898
Immune disease	05330 Allograft rejection	4	pos_2730 pos_57 pos_1982 pos_1898
Immune disease	05332 Graft-versus-host disease	4	pos_2730 pos_57 pos_1982 pos_1898
Immune disease	05340 Primary immunodeficiency	4	pos_2730 pos_57 pos_1982 pos_1898
Immune system	04062 Chemokine signaling pathway	6	pos_1442 pos_662 pos_1982 pos_9 pos_2730 pos_1714
Immune system	04611 Platelet activation	2	pos_1442 pos_1714
Immune system	04612 Antigen processing and presentation	3	pos_1442 pos_1982 pos_1714
Immune system	04613 Neutrophil extracellular trap formation	2	pos_1442 pos_1714
Immune system	04620 Toll-like receptor signaling pathway	2	pos_1442 pos_1714
Immune system	04621 NOD-like receptor signaling pathway	2	pos_1442 pos_1714
Immune system	04622 RIG-I-like receptor signaling pathway	2	pos_1442 pos_1714
Immune system	04623 Cytosolic DNA-sensing pathway	2	pos_1442 pos_1714
Immune system	04624 Toll and Imd signaling pathway	2	pos_1442 pos_1714
Immune system	04625 C-type lectin receptor signaling pathway	3	pos_1442 pos_1982 pos_1714
Immune system	04650 Natural killer cell mediated cytotoxicity	3	pos_1442 pos_1982 pos_1714
Immune system	04657 IL-17 signaling pathway	5	pos_1442 pos_662 pos_1982 pos_9 pos_1714
Immune system	04658 Th1 and Th2 cell differentiation	3	pos_1442 pos_1982 pos_1714
Immune system	04659 Th17 cell differentiation	5	pos_1442 pos_662 pos_1982 pos_9 pos_1714
Immune system	04660 T cell receptor signaling pathway	3	pos_1442 pos_1982 pos_1714
Immune system	04662 B cell receptor signaling pathway	5	pos_1442 pos_662 pos_1982 pos_9 pos_1714
Immune system	04664 Fc epsilon RI signaling pathway	6	pos_1442 pos_662 pos_1982 pos_9 pos_2730 pos_1714
Immune system	04666 Fc gamma R-mediated phagocytosis	6	pos_1442 pos_662 pos_1982 pos_9 pos_2730 pos_1714
Immune system	04670 Leukocyte transendothelial migration	6	pos_1442 pos_662 pos_1982 pos_9 pos_2730 pos_1714
Immune system	04672 Intestinal immune network for IgA production	6	pos_1442 pos_662 pos_1982 pos_9 pos_2730 pos_1714
Infectious disease: bacterial	05100 Bacterial invasion of epithelial cells	5	pos_1835 pos_1007 pos_1442 pos_1044 pos_331
Infectious disease: bacterial	05110 Vibrio cholerae infection	1	pos_1442
Infectious disease: bacterial	05120 Epithelial cell signaling in Helicobacter pylori infection	1	pos_1442
Infectious disease: bacterial	05130 Pathogenic Escherichia coli infection	3	pos_1442 pos_1007 pos_331
Infectious disease: bacterial	05131 Shigellosis	4	pos_1442 pos_1007 pos_1044 pos_331
Infectious disease: bacterial	05132 Salmonella infection	3	pos_1442 pos_1007 pos_331
Infectious disease: bacterial	05133 Pertussis	4	pos_1442 pos_1007 pos_1044 pos_331
Infectious disease: bacterial	05134 Legionellosis	4	pos_1442 pos_1007 pos_1044 pos_331
Infectious disease: bacterial	05135 Yersinia infection	4	pos_1442 pos_1007 pos_1044 pos_331
Infectious disease: bacterial	05150 Staphylococcus aureus infection	4	pos_1442 pos_1007 pos_1044 pos_331
Infectious disease: bacterial	05152 Tuberculosis	5	pos_1835 pos_1007 pos_1442 pos_1044 pos_331
Infectious disease: parasitic	05140 Leishmaniasis	6	pos_766 pos_2649 pos_1442 pos_1714 pos_1982 pos_1898
Infectious disease: parasitic	05142 Chagas disease	6	pos_766 pos_2649 pos_1442 pos_1714 pos_1982 pos_1898
Infectious disease: parasitic	05143 African trypanosomiasis	6	pos_766 pos_2649 pos_1442 pos_1714 pos_1982 pos_1898
Infectious disease: parasitic	05144 Malaria	6	pos_766 pos_2649 pos_1442 pos_1714 pos_1982 pos_1898
Infectious disease: parasitic	05145 Toxoplasmosis	6	pos_766 pos_2649 pos_1442 pos_1714 pos_1982 pos_1898
Infectious disease: parasitic	05146 Amoebiasis	5	pos_766 pos_1442 pos_1714 pos_1982 pos_1898
Infectious disease: viral	05160 Hepatitis C	1	pos_1442
Infectious disease: viral	05161 Hepatitis B	1	pos_1442
Infectious disease: viral	05162 Measles	1	pos_1442
Infectious disease: viral	05163 Human cytomegalovirus infection	2	pos_1442 pos_1982
Infectious disease: viral	05164 Influenza A	1	pos_1442
Infectious disease: viral	05165 Human papillomavirus infection	4	pos_1442 pos_1982 pos_1007 pos_331
Infectious disease: viral	05167 Kaposi sarcoma-associated herpesvirus infection	4	pos_1442 pos_1982 pos_1007 pos_331
Infectious disease: viral	05168 Herpes simplex virus 1 infection	1	pos_1442
Infectious disease: viral	05169 Epstein-Barr virus infection	4	pos_1442 pos_1982 pos_1007 pos_331
Infectious disease: viral	05170 Human immunodeficiency virus 1 infection	1	pos_1442
Infectious disease: viral	05171 Coronavirus disease - COVID-19	1	pos_1442
Lipid metabolism	00061 Fatty acid biosynthesis	5	pos_14 pos_499 pos_478 pos_1355 pos_663
Lipid metabolism	00062 Fatty acid elongation	5	pos_14 pos_499 pos_478 pos_1355 pos_663
Lipid metabolism	00071 Fatty acid degradation	6	pos_14 pos_2744 pos_499 pos_478 pos_1355 pos_663
Lipid metabolism	00072 Synthesis and degradation of ketone bodies	6	pos_14 pos_2744 pos_499 pos_478 pos_1355 pos_663
Lipid metabolism	00073 Cutin, suberine and wax biosynthesis	6	pos_14 pos_2744 pos_499 pos_478 pos_1355 pos_663
Lipid metabolism	00100 Steroid biosynthesis	12	pos_919 pos_1835 pos_14 pos_1783 pos_2744 pos_2054 pos_730 pos_499 pos_478 pos_1355 pos_663 pos_57
Lipid metabolism	00120 Primary bile acid biosynthesis	14	pos_919 pos_1835 pos_14 pos_1783 pos_2744 pos_2105 pos_2054 pos_730 pos_499 pos_3 pos_478 pos_1355 pos_663 pos_57
Lipid metabolism	00121 Secondary bile acid biosynthesis	14	pos_919 pos_1835 pos_14 pos_1783 pos_2744 pos_2105 pos_2054 pos_730 pos_499 pos_3 pos_478 pos_1355 pos_663 pos_57
Lipid metabolism	00140 Steroid hormone biosynthesis	21	pos_1148 pos_3 pos_1169 pos_1407 pos_1783 pos_663 pos_919 pos_14 pos_2072 pos_1204 pos_478 pos_1835 pos_2744 pos_2054 pos_730 pos_499 pos_507 pos_1355 pos_57 pos_2105 pos_1165
Lipid metabolism	00561 Glycerolipid metabolism	22	pos_1148 pos_3 pos_1169 pos_1407 pos_1783 pos_663 pos_919 pos_14 pos_2072 pos_1204 pos_478 pos_1835 pos_2744 pos_2054 pos_730 pos_499 pos_1087 pos_507 pos_1355 pos_57 pos_2105 pos_1165
Lipid metabolism	00564 Glycerophospholipid metabolism	35	pos_1148 pos_3 pos_1169 pos_879 pos_1407 pos_1783 pos_663 pos_2204 pos_919 pos_14 pos_2072 pos_1833 pos_39 pos_2769 pos_331 pos_1806 pos_1204 pos_478 pos_1898 pos_1835 pos_2744 pos_2054 pos_730 pos_499 pos_1430 pos_1018 pos_1087 pos_507 pos_2263 pos_1355 pos_57 pos_2105 pos_1007 pos_1165 pos_1619
Lipid metabolism	00565 Ether lipid metabolism	35	pos_1148 pos_3 pos_1169 pos_879 pos_1407 pos_1783 pos_663 pos_2204 pos_919 pos_14 pos_2072 pos_1833 pos_39 pos_2769 pos_331 pos_1806 pos_1204 pos_478 pos_1898 pos_1835 pos_2744 pos_2054 pos_730 pos_499 pos_1430 pos_1018 pos_1087 pos_507 pos_2263 pos_1355 pos_57 pos_2105 pos_1007 pos_1165 pos_1619
Lipid metabolism	00590 Arachidonic acid metabolism	47	pos_1148 pos_3 pos_1169 pos_404 pos_879 pos_1407 pos_1783 pos_663 pos_2204 pos_919 pos_1714 pos_723 pos_14 pos_1110 pos_2072 pos_1833 pos_39 pos_1982 pos_2769 pos_331 pos_1806 pos_1204 pos_478 pos_607 pos_1898 pos_1835 pos_2744 pos_2054 pos_730 pos_499 pos_1430 pos_1709 pos_1018 pos_1087 pos_507 pos_2263 pos_1355 pos_57 pos_1 pos_577 pos_1019 pos_2105 pos_1007 pos_2166 pos_1165 pos_1619 pos_813
Lipid metabolism	00591 Linoleic acid metabolism	51	pos_1148 pos_3 pos_1169 pos_404 pos_879 pos_1407 pos_1783 pos_663 pos_2204 pos_919 pos_1714 pos_723 pos_1005 pos_14 pos_1110 pos_2072 pos_1833 pos_39 pos_1982 pos_2769 pos_695 pos_331 pos_1806 pos_1204 pos_478 pos_607 pos_1898 pos_1835 pos_2744 pos_1904 pos_2054 pos_730 pos_499 pos_1430 pos_1709 pos_1018 pos_1087 pos_507 pos_2263 pos_1355 pos_57 pos_1 pos_577 pos_1019 pos_2105 pos_1007 pos_2166 p…
Lipid metabolism	00592 alpha-Linolenic acid metabolism	59	pos_1148 pos_659 pos_161 pos_3 pos_1169 pos_404 pos_879 pos_1407 pos_1783 pos_663 pos_2204 pos_919 pos_1714 pos_723 pos_1005 pos_14 pos_1110 pos_560 pos_2072 pos_1833 pos_39 pos_1982 pos_2769 pos_695 pos_331 pos_1806 pos_2812 pos_1204 pos_478 pos_607 pos_1898 pos_1835 pos_2744 pos_1904 pos_2054 pos_730 pos_499 pos_1430 pos_1709 pos_101 pos_1018 pos_1087 pos_507 pos_2263 pos_1355 pos_57 pos_1 pos_…
Lipid metabolism	00600 Sphingolipid metabolism	38	pos_1148 pos_3 pos_1169 pos_879 pos_1407 pos_1783 pos_663 pos_2204 pos_919 pos_14 pos_2072 pos_1833 pos_39 pos_2769 pos_331 pos_1806 pos_1204 pos_478 pos_1898 pos_1835 pos_2744 pos_2054 pos_730 pos_499 pos_1430 pos_1709 pos_1018 pos_1087 pos_507 pos_2263 pos_1355 pos_57 pos_1 pos_2105 pos_1007 pos_1165 pos_1619 pos_813
Lipid metabolism	01040 Biosynthesis of unsaturated fatty acids	64	pos_1148 pos_659 pos_161 pos_1252 pos_3 pos_1169 pos_404 pos_879 pos_1407 pos_1783 pos_663 pos_2204 pos_919 pos_1714 pos_723 pos_1005 pos_522 pos_14 pos_1110 pos_560 pos_2072 pos_1833 pos_39 pos_1982 pos_2769 pos_695 pos_331 pos_1806 pos_2812 pos_1204 pos_478 pos_607 pos_1898 pos_1835 pos_2744 pos_1904 pos_1705 pos_2054 pos_730 pos_499 pos_1430 pos_1709 pos_101 pos_1018 pos_1087 pos_507 pos_2263 …
Membrane transport	02010 ABC transporters	23	pos_1267 pos_806 pos_1048 pos_2 pos_862 pos_2785 pos_39 pos_1697 pos_492 pos_1422 pos_766 pos_835 pos_1044 pos_4 pos_1362 pos_1025 pos_650 pos_2105 pos_13 pos_2612 pos_212 pos_2792 pos_19
Membrane transport	02060 Phosphotransferase system (PTS)	23	pos_1267 pos_806 pos_1048 pos_2 pos_862 pos_2785 pos_39 pos_1697 pos_492 pos_1422 pos_766 pos_835 pos_1044 pos_4 pos_1362 pos_1025 pos_650 pos_2105 pos_13 pos_2612 pos_212 pos_2792 pos_19
Membrane transport	03070 Bacterial secretion system	23	pos_1267 pos_806 pos_1048 pos_2 pos_862 pos_2785 pos_39 pos_1697 pos_492 pos_1422 pos_766 pos_835 pos_1044 pos_4 pos_1362 pos_1025 pos_650 pos_2105 pos_13 pos_2612 pos_212 pos_2792 pos_19
Metabolism of cofactors and vitamins	00130 Ubiquinone and other terpenoid-quinone biosynthesis	35	pos_1752 pos_1286 pos_913 pos_1986 pos_2601 pos_388 pos_2802 pos_1048 pos_1573 pos_545 pos_862 pos_2466 pos_1195 pos_75 pos_1260 pos_478 pos_614 pos_2853 pos_1370 pos_2843 pos_9 pos_1844 pos_1383 pos_152 pos_1740 pos_220 pos_2105 pos_639 pos_662 pos_1022 pos_1517 pos_2218 pos_754 pos_911 pos_272
Metabolism of cofactors and vitamins	00670 One carbon pool by folate	19	pos_913 pos_1986 pos_2601 pos_1573 pos_545 pos_862 pos_1195 pos_75 pos_478 pos_614 pos_1370 pos_2843 pos_1740 pos_2105 pos_639 pos_1022 pos_1517 pos_754 pos_911
Metabolism of cofactors and vitamins	00730 Thiamine metabolism	3	pos_2601 pos_1740 pos_2105
Metabolism of cofactors and vitamins	00740 Riboflavin metabolism	4	pos_2601 pos_1370 pos_1740 pos_2105
Metabolism of cofactors and vitamins	00750 Vitamin B6 metabolism	5	pos_2105 pos_1370 pos_2601 pos_911 pos_1740
Metabolism of cofactors and vitamins	00760 Nicotinate and nicotinamide metabolism	10	pos_1573 pos_545 pos_1195 pos_2105 pos_1370 pos_1022 pos_2601 pos_911 pos_1740 pos_614
Metabolism of cofactors and vitamins	00770 Pantothenate and CoA biosynthesis	12	pos_1573 pos_545 pos_1195 pos_2105 pos_913 pos_1370 pos_75 pos_1022 pos_2601 pos_911 pos_1740 pos_614
Metabolism of cofactors and vitamins	00780 Biotin metabolism	16	pos_1573 pos_545 pos_862 pos_1195 pos_2105 pos_913 pos_1370 pos_75 pos_1022 pos_1517 pos_2843 pos_2601 pos_754 pos_911 pos_1740 pos_614
Metabolism of cofactors and vitamins	00785 Lipoic acid metabolism	17	pos_1573 pos_545 pos_862 pos_1195 pos_2105 pos_913 pos_1370 pos_75 pos_1022 pos_1517 pos_2843 pos_2601 pos_754 pos_478 pos_911 pos_1740 pos_614
Metabolism of cofactors and vitamins	00790 Folate biosynthesis	19	pos_913 pos_1986 pos_2601 pos_1573 pos_545 pos_862 pos_1195 pos_75 pos_478 pos_614 pos_1370 pos_2843 pos_1740 pos_2105 pos_639 pos_1022 pos_1517 pos_754 pos_911
Metabolism of cofactors and vitamins	00830 Retinol metabolism	23	pos_913 pos_1986 pos_2601 pos_1573 pos_545 pos_862 pos_1195 pos_75 pos_1260 pos_478 pos_614 pos_1370 pos_2843 pos_9 pos_1740 pos_220 pos_2105 pos_639 pos_662 pos_1022 pos_1517 pos_754 pos_911
Metabolism of cofactors and vitamins	00860 Porphyrin and chlorophyll metabolism	27	pos_1286 pos_913 pos_1986 pos_2601 pos_1048 pos_1573 pos_545 pos_862 pos_1195 pos_75 pos_1260 pos_478 pos_614 pos_1370 pos_2843 pos_9 pos_152 pos_1740 pos_220 pos_2105 pos_639 pos_662 pos_1022 pos_1517 pos_2218 pos_754 pos_911
Metabolism of other amino acids	00410 beta-Alanine metabolism	3	pos_913 pos_975 pos_1267
Metabolism of other amino acids	00430 Taurine and hypotaurine metabolism	5	pos_1267 pos_913 pos_975 pos_1675 pos_1745
Metabolism of other amino acids	00440 Phosphonate and phosphinate metabolism	7	pos_2105 pos_1267 pos_913 pos_975 pos_431 pos_1675 pos_1745
Metabolism of other amino acids	00450 Selenocompound metabolism	7	pos_2105 pos_1267 pos_913 pos_975 pos_431 pos_1675 pos_1745
Metabolism of other amino acids	00460 Cyanoamino acid metabolism	7	pos_2105 pos_1267 pos_913 pos_975 pos_431 pos_1675 pos_1745
Metabolism of other amino acids	00471 D-Glutamine and D-glutamate metabolism	7	pos_2105 pos_1267 pos_913 pos_975 pos_431 pos_1675 pos_1745
Metabolism of other amino acids	00472 D-Arginine and D-ornithine metabolism	9	pos_766 pos_2105 pos_1267 pos_1027 pos_913 pos_975 pos_431 pos_1675 pos_1745
Metabolism of other amino acids	00473 D-Alanine metabolism	9	pos_766 pos_2105 pos_1267 pos_1027 pos_913 pos_975 pos_431 pos_1675 pos_1745
Metabolism of other amino acids	00480 Glutathione metabolism	11	pos_545 pos_766 pos_2105 pos_1267 pos_1027 pos_913 pos_975 pos_431 pos_1675 pos_759 pos_1745
Metabolism of terpenoids and polyketides	00253 Tetracycline biosynthesis	4	pos_743 pos_57 pos_1783 pos_1054
Metabolism of terpenoids and polyketides	00281 Geraniol degradation	4	pos_743 pos_57 pos_1783 pos_1054
Metabolism of terpenoids and polyketides	00522 Biosynthesis of 12-, 14- and 16-membered macrolides	4	pos_743 pos_57 pos_1783 pos_1054
Metabolism of terpenoids and polyketides	00523 Polyketide sugar unit biosynthesis	4	pos_743 pos_57 pos_1783 pos_1054
Metabolism of terpenoids and polyketides	00900 Terpenoid backbone biosynthesis	2	pos_1783 pos_1054
Metabolism of terpenoids and polyketides	00902 Monoterpenoid biosynthesis	2	pos_1783 pos_1054
Metabolism of terpenoids and polyketides	00903 Limonene and pinene degradation	4	pos_743 pos_57 pos_1783 pos_1054
Metabolism of terpenoids and polyketides	00904 Diterpenoid biosynthesis	2	pos_1783 pos_1054
Metabolism of terpenoids and polyketides	00905 Brassinosteroid biosynthesis	2	pos_1783 pos_1054
Metabolism of terpenoids and polyketides	00906 Carotenoid biosynthesis	2	pos_1783 pos_1054
Metabolism of terpenoids and polyketides	00908 Zeatin biosynthesis	4	pos_743 pos_57 pos_1783 pos_1054
Metabolism of terpenoids and polyketides	00909 Sesquiterpenoid and triterpenoid biosynthesis	2	pos_1783 pos_1054
Metabolism of terpenoids and polyketides	00981 Insect hormone biosynthesis	4	pos_743 pos_57 pos_1783 pos_1054
Metabolism of terpenoids and polyketides	01051 Biosynthesis of ansamycins	4	pos_743 pos_57 pos_1783 pos_1054
Metabolism of terpenoids and polyketides	01052 Type I polyketide structures	4	pos_743 pos_57 pos_1783 pos_1054
Metabolism of terpenoids and polyketides	01053 Biosynthesis of siderophore group nonribosomal peptides	4	pos_743 pos_57 pos_1783 pos_1054
Metabolism of terpenoids and polyketides	01054 Nonribosomal peptide structures	4	pos_743 pos_57 pos_1783 pos_1054
Metabolism of terpenoids and polyketides	01055 Biosynthesis of vancomycin group antibiotics	4	pos_743 pos_57 pos_1783 pos_1054
Metabolism of terpenoids and polyketides	01056 Biosynthesis of type II polyketide backbone	4	pos_743 pos_57 pos_1783 pos_1054
Metabolism of terpenoids and polyketides	01057 Biosynthesis of type II polyketide products	4	pos_743 pos_57 pos_1783 pos_1054
Metabolism of terpenoids and polyketides	01059 Biosynthesis of enediyne antibiotics	4	pos_743 pos_57 pos_1783 pos_1054
Nervous system	04720 Long-term potentiation	9	pos_577 pos_723 pos_2166 pos_1442 pos_39 pos_1982 pos_879 pos_607 pos_1714
Nervous system	04721 Synaptic vesicle cycle	18	pos_577 pos_723 pos_2166 pos_1007 pos_2105 pos_1442 pos_39 pos_1982 pos_1833 pos_331 pos_1430 pos_2730 pos_884 pos_1018 pos_1806 pos_879 pos_607 pos_1714
Nervous system	04722 Neurotrophin signaling pathway	18	pos_577 pos_723 pos_2166 pos_1007 pos_2105 pos_1442 pos_39 pos_1982 pos_1833 pos_331 pos_1430 pos_2730 pos_884 pos_1018 pos_1806 pos_879 pos_607 pos_1714
Nervous system	04723 Retrograde endocannabinoid signaling	16	pos_577 pos_723 pos_2166 pos_1007 pos_1442 pos_39 pos_1982 pos_1833 pos_331 pos_1430 pos_884 pos_1018 pos_1806 pos_879 pos_607 pos_1714
Nervous system	04724 Glutamatergic synapse	1	pos_1442
Nervous system	04725 Cholinergic synapse	3	pos_1442 pos_879 pos_39
Nervous system	04726 Serotonergic synapse	9	pos_577 pos_723 pos_2166 pos_1442 pos_39 pos_1982 pos_879 pos_607 pos_1714
Nervous system	04727 GABAergic synapse	1	pos_1442
Nervous system	04728 Dopaminergic synapse	3	pos_1442 pos_879 pos_39
Nervous system	04730 Long-term depression	9	pos_577 pos_723 pos_2166 pos_1442 pos_39 pos_1982 pos_879 pos_607 pos_1714
Neurodegenerative disease	05012 Parkinson disease	2	pos_1442 pos_1025
Neurodegenerative disease	05014 Amyotrophic lateral sclerosis	3	pos_1442 pos_766 pos_1025
Neurodegenerative disease	05016 Huntington disease	3	pos_1442 pos_766 pos_1025
Neurodegenerative disease	05017 Spinocerebellar ataxia	3	pos_1442 pos_766 pos_1025
Neurodegenerative disease	05020 Prion disease	4	pos_1442 pos_766 pos_1025 pos_1148
Neurodegenerative disease	05022 Pathways of neurodegeneration - multiple diseases	4	pos_1442 pos_766 pos_1025 pos_1148
Nucleotide metabolism	00230 Purine metabolism	13	pos_2717 pos_12 pos_2105 pos_2328 pos_15 pos_13 pos_1860 pos_1025 pos_92 pos_1810 pos_564 pos_61 pos_602
Nucleotide metabolism	00240 Pyrimidine metabolism	16	pos_2717 pos_2406 pos_12 pos_2105 pos_2328 pos_15 pos_13 pos_1860 pos_1025 pos_92 pos_1810 pos_564 pos_61 pos_212 pos_2792 pos_602
Sensory system	04740 Olfactory transduction	4	pos_1442 pos_1355 pos_220 pos_1714
Sensory system	04742 Taste transduction	6	pos_1442 pos_5 pos_879 pos_1355 pos_220 pos_1714
Sensory system	04744 Phototransduction	1	pos_220
Sensory system	04745 Phototransduction - fly	4	pos_1442 pos_1355 pos_220 pos_1714
Sensory system	04750 Inflammatory mediator regulation of TRP channels	10	pos_1442 pos_5 pos_1982 pos_884 pos_362 pos_2730 pos_879 pos_1355 pos_220 pos_1714
Signal transduction	04010 MAPK signaling pathway	1	pos_1442
Signal transduction	04011 MAPK signaling pathway - yeast	1	pos_1442
Signal transduction	04012 ErbB signaling pathway	1	pos_1442
Signal transduction	04013 MAPK signaling pathway - fly	1	pos_1442
Signal transduction	04014 Ras signaling pathway	1	pos_1442
Signal transduction	04015 Rap1 signaling pathway	1	pos_1442
Signal transduction	04016 MAPK signaling pathway - plant	1	pos_1442
Signal transduction	04020 Calcium signaling pathway	2	pos_1442 pos_2601
Signal transduction	04022 cGMP-PKG signaling pathway	7	pos_1442 pos_1982 pos_2601 pos_1709 pos_1025 pos_1 pos_879
Signal transduction	04024 cAMP signaling pathway	7	pos_1442 pos_1982 pos_2601 pos_1709 pos_1025 pos_1 pos_879
Signal transduction	04064 NF-kappa B signaling pathway	1	pos_1442
Signal transduction	04066 HIF-1 signaling pathway	1	pos_1442
Signal transduction	04068 FoxO signaling pathway	1	pos_1442
Signal transduction	04070 Phosphatidylinositol signaling system	2	pos_1442 pos_2601
Signal transduction	04071 Sphingolipid signaling pathway	5	pos_1442 pos_2601 pos_1709 pos_1025 pos_1
Signal transduction	04072 Phospholipase D signaling pathway	2	pos_1442 pos_2601
Signal transduction	04075 Plant hormone signal transduction	9	pos_766 pos_1442 pos_1982 pos_1044 pos_2601 pos_1709 pos_1025 pos_1 pos_879
Signal transduction	04150 mTOR signaling pathway	9	pos_766 pos_1442 pos_1982 pos_1044 pos_2601 pos_1709 pos_1025 pos_1 pos_879
Signal transduction	04151 PI3K-Akt signaling pathway	7	pos_1442 pos_1982 pos_2601 pos_1709 pos_1025 pos_1 pos_879
Signal transduction	04152 AMPK signaling pathway	7	pos_1442 pos_1982 pos_2601 pos_1709 pos_1025 pos_1 pos_879
Signal transduction	04310 Wnt signaling pathway	1	pos_1442
Signal transduction	04330 Notch signaling pathway	1	pos_1442
Signal transduction	04340 Hedgehog signaling pathway	1	pos_1442
Signal transduction	04341 Hedgehog signaling pathway - fly	1	pos_1442
Signal transduction	04350 TGF-beta signaling pathway	1	pos_1442
Signal transduction	04370 VEGF signaling pathway	1	pos_1442
Signal transduction	04371 Apelin signaling pathway	1	pos_1442
Signal transduction	04390 Hippo signaling pathway	1	pos_1442
Signal transduction	04391 Hippo signaling pathway - fly	1	pos_1442
Signal transduction	04392 Hippo signaling pathway - multiple species	1	pos_1442
Signal transduction	04630 JAK-STAT signaling pathway	1	pos_1442
Signal transduction	04668 TNF signaling pathway	1	pos_1442
Signaling molecules and interaction	04060 Cytokine-cytokine receptor interaction	7	pos_2105 pos_819 pos_1982 pos_884 pos_1025 pos_2730 pos_879
Signaling molecules and interaction	04061 Viral protein interaction with cytokine and cytokine receptor	7	pos_2105 pos_819 pos_1982 pos_884 pos_1025 pos_2730 pos_879
Signaling molecules and interaction	04080 Neuroactive ligand-receptor interaction	7	pos_2105 pos_819 pos_1982 pos_884 pos_1025 pos_2730 pos_879
Signaling molecules and interaction	04512 ECM-receptor interaction	7	pos_2105 pos_819 pos_1982 pos_884 pos_1025 pos_2730 pos_879
Signaling molecules and interaction	04514 Cell adhesion molecules	7	pos_2105 pos_819 pos_1982 pos_884 pos_1025 pos_2730 pos_879
Substance dependence	05032 Morphine addiction	1	pos_1025
Substance dependence	05033 Nicotine addiction	2	pos_879 pos_1025
Substance dependence	05034 Alcoholism	2	pos_879 pos_1025
Translation	00970 Aminoacyl-tRNA biosynthesis	8	pos_862 pos_766 pos_2105 pos_1267 pos_1044 pos_4 pos_671 pos_1048
Translation	03008 Ribosome biogenesis in eukaryotes	8	pos_862 pos_766 pos_2105 pos_1267 pos_1044 pos_4 pos_671 pos_1048
Translation	03013 RNA transport	8	pos_862 pos_766 pos_2105 pos_1267 pos_1044 pos_4 pos_671 pos_1048
Translation	03015 mRNA surveillance pathway	8	pos_862 pos_766 pos_2105 pos_1267 pos_1044 pos_4 pos_671 pos_1048
Transport and catabolism	04136 Autophagy - other	2	pos_1007 pos_331
Transport and catabolism	04137 Mitophagy - animal	2	pos_1007 pos_331
Transport and catabolism	04138 Autophagy - yeast	2	pos_1007 pos_331
Transport and catabolism	04139 Mitophagy - yeast	2	pos_1007 pos_331
Transport and catabolism	04140 Autophagy - animal	2	pos_1007 pos_331
Xenobiotics biodegradation and metabolism	00980 Metabolism of xenobiotics by cytochrome P450	9	pos_2008 pos_1195 pos_2634 pos_2463 pos_2330 pos_2509 pos_181 pos_395 pos_326
Xenobiotics biodegradation and metabolism	00982 Drug metabolism - cytochrome P450	13	pos_2008 pos_2191 pos_1195 pos_2634 pos_2465 pos_2463 pos_2283 pos_2330 pos_2567 pos_2509 pos_181 pos_395 pos_326
Xenobiotics biodegradation and metabolism	00983 Drug metabolism - other enzymes	16	pos_2008 pos_545 pos_2191 pos_1195 pos_2634 pos_2465 pos_2463 pos_2283 pos_2330 pos_2567 pos_1539 pos_2601 pos_2509 pos_181 pos_395 pos_326
