# Supplementary material for: Multi-omics analyses reveal that the gut microbiome and its metabolites promote milk fat synthesis in Zhongdian yak cows
Source: PeerJ journal article supplement (doi:10.7717/peerj.14444), 2022-12-02
Supplement: biomarker_Web_Report_.zip [file meta_lipidmaps_anno.xls]

#ID	Name	LM_ID	NAME	SYSTEMATIC_NAME	SYNONYMS	CATEGORY	MAIN_CLASS	SUB_CLASS	ABBREVIATION
pos_10	Deoxycholic acid	LMST04010040	Deoxycholic acid	3alpha,12alpha-Dihydroxy-5beta-cholan-24-oic Acid	-	Sterol Lipids [ST]	Bile acids and derivatives [ST04]	C24 bile acids, alcohols, and derivatives [ST0401]	ST 24:1;O4
pos_100	Dihydroscoparin	LMPK12140433	Dihydroscoparin	-	-	Polyketides [PK]	Flavonoids [PK12]	Flavanones [PK1214]	-
pos_1003	Testolactone	LMST02020084	testolactone	3-oxo-13,17-secoandrosta-1,4-dieno-17,13alpha-lactone	(4aS,4bR,10aR,10bS,12aS)-10a,12a-dimethyl-3,4,4a,5,6,10a,10b,11,12,12a-decahydro-2H-naphtho[2,1-f]chromene-2,8(4bH)-dione; 1,2-didehydrotestololactone; 1-dehydrotestololactone; 13-hydroxy-3-oxo-13,17-secoandrosta-1,4-dien-17-oic acid delta-lactone; D-homo-17a-oxaandrosta-1,4-diene-3,17-dione; Delta(1)-testololactone; Teslac; Testolactone	Sterol Lipids [ST]	Steroids [ST02]	C19 steroids (androgens) and derivatives [ST0202]	ST 19:4;O3
pos_1005	Bovinic acid	LMFA01030118	Rumenic acid	9Z,11E-octadecadienoic acid	cis-9, trans-11-octadecadienoic acid; bovinic acid; C18:2n-7,9	Fatty Acyls [FA]	Fatty Acids and Conjugates [FA01]	Unsaturated fatty acids [FA0103]	FA 18:2
pos_1007	PE(14:0/22:4(7Z,10Z,13Z,16Z))	LMGP02010421	PE(14:0/22:4(7Z,10Z,13Z,16Z))	1-tetradecanoyl-2-(7Z,10Z,13Z,16Z-docosatetraenoyl)-glycero-3-phosphoethanolamine	PE(36:4); PE(14:0_22:4)	Glycerophospholipids [GP]	Glycerophosphoethanolamines [GP02]	Diacylglycerophosphoethanolamines [GP0201]	PE 36:4
pos_101	8Z,11Z,14Z-heptadecatrienal	LMFA06000111	8Z,11Z,14Z-heptadecatrienal	8Z,11Z,14Z-heptadecatrienal	-	Fatty Acyls [FA]	Fatty aldehydes [FA06]	-	FAL 17:3
pos_1017	PE(15:0/18:4(6Z,9Z,12Z,15Z))	LMGP02010461	PE(15:0/18:4(6Z,9Z,12Z,15Z))	1-pentadecanoyl-2-(6Z,9Z,12Z,15Z-octadecatetraenoyl)-glycero-3-phosphoethanolamine	PE(33:4); PE(15:0_18:4)	Glycerophospholipids [GP]	Glycerophosphoethanolamines [GP02]	Diacylglycerophosphoethanolamines [GP0201]	PE 33:4
pos_1030	2-Hydroxymyristic acid	LMFA01050484	2-Hydroxymyristic acid	2-hydroxytetradecanoic acid	-	Fatty Acyls [FA]	Fatty Acids and Conjugates [FA01]	Hydroxy fatty acids [FA0105]	FA 14:0;O
pos_1033	Xanthomicrol	LMPK12111447	Xanthomicrol	-	-	Polyketides [PK]	Flavonoids [PK12]	Flavones and Flavonols [PK1211]	-
pos_1038	Tacrolimus	LMPK04000003	Tacrolimus	-	-	Polyketides [PK]	Macrolides and lactone polyketides [PK04]	-	-
pos_1050	Brassinolide	LMST01140001	Brassinolide	2alpha,3alpha,22R,23R-tetrahydroxy-6,7-seco-5-campestano-6,7-lactone	2alpha-3alpha,22R,23R-tetrahydroxy-24-methyl-6,7-s-5alpha-cholestano-6,7-lactone	Sterol Lipids [ST]	Sterols [ST01]	Brassinolides and derivatives [ST0114]	ST 28:1;O6
pos_1055	7alpha,12alpha,26-trihydroxycholest-4-en-3-one	LMST04030158	7alpha,12alpha,26-trihydroxycholest-4-en-3-one	7alpha,12alpha,26-trihydroxycholest-4-en-3-one	4-cholesten-7alpha,12alpha,26-triol-3-one	Sterol Lipids [ST]	Bile acids and derivatives [ST04]	C27 bile acids, alcohols, and derivatives [ST0403]	ST 27:2;O4
pos_106	(+)-4-Isocedren-15-al	LMPR0103690004	(+)-4-Isocedren-15-al	-	-	Prenol Lipids [PR]	Isoprenoids [PR01]	C15 isoprenoids (sesquiterpenes) [PR0103]	-
pos_1067	PE(22:0/24:1(15Z))	LMGP02010292	PE(22:0/24:1(15Z))	1-docosanoyl-2-(15Z-tetracosenoyl)-sn-glycero-3-phosphoethanolamine	15-Tetracosenoic acid, 1-[[[(2-aminoethoxy)hydroxyphosphinyl]oxy]methyl]-2-[(1-oxodocosyl)oxy]ethyl ester, [R-(Z)]- (9CI); PE(22:0/24:1); PE(46:1); PE(22:0_24:1)	Glycerophospholipids [GP]	Glycerophosphoethanolamines [GP02]	Diacylglycerophosphoethanolamines [GP0201]	PE 46:1
pos_107	Isomonospermoside	LMPK12140066	Isomonospermoside	-	-	Polyketides [PK]	Flavonoids [PK12]	Flavanones [PK1214]	-
pos_1077	Flavoxanthin	LMPR01070271	Flavoxanthin	-	-	Prenol Lipids [PR]	Isoprenoids [PR01]	C40 isoprenoids (tetraterpenes) [PR0107]	-
pos_1079	Cer(d18:1/14:0)	LMSP02010001	Cer(d18:1/14:0)	N-(tetradecanoyl)-sphing-4-enine	C14 Cer; N-(tetradecanoyl)-ceramide; N-(myristoyl)-ceramide; Cer[NS]	Sphingolipids [SP]	Ceramides [SP02]	N-acylsphingosines (ceramides) [SP0201]	Cer 32:1;O2
pos_1096	20-oxo-leukotriene B4	LMFA03020064	20-oxo-leukotriene B4	(5S,6Z,8E,10E,12R,14Z)-5,12-dihydroxy-20-oxoicosa-6,8,10,14-tetraenoic acid	-	Fatty Acyls [FA]	Eicosanoids [FA03]	Leukotrienes [FA0302]	FA 20:5;O3
pos_110	4,6-heptadienal	LMFA06000025	4,6-heptadienal	4,6-heptadienal	-	Fatty Acyls [FA]	Fatty aldehydes [FA06]	-	FAL 7:2
pos_1101	Licorice glycoside D1	LMPK12140028	Licorice glycoside D1	(2R)-7,4'-Dihydroxyflavanone 4'-[4-p-coumaroylapiosyl-(1->2)-glucoside]	-	Polyketides [PK]	Flavonoids [PK12]	Flavanones [PK1214]	-
pos_1104	Doxycycline	LMPK07000001	Doxycycline	-	-	Polyketides [PK]	Linear tetracyclines [PK07]	-	-
pos_1109	Digitoxin	LMST01120018	digitoxin	3beta-[2,6-dideoxy-beta-D-ribo-hexopyranosyl-(1-4)-2,6-dideoxy-beta-D-ribo-hexopyranosyl-(1-4)-2,6-dideoxy-beta-D-ribo-hexopyranosyloxy]-14-hydroxy-5beta-card-20(22)-enolide	Crystodigin (TN); Digitoxin; Digitoxoside	Sterol Lipids [ST]	Sterols [ST01]	Cardanolides and derivatives [ST0112]	-
pos_111	PE(16:0/0:0)	LMGP02050002	PE(16:0/0:0)	1-hexadecanoyl-sn-glycero-3-phosphoethanolamine	LPE(16:0/0:0); 16:0 LYSO-PE; 1-palmitoyl-phosphatidylethenolamine; Hexadecanoic acid, 3-[[(2-aminoethoxy)hydroxyphosphinyl]oxy]-2-hydroxypropyl ester, (R)-; 1-Palmitoyl-sn-glycerol-3-L-alpha-phosphorylethanolamine; 1-Palmitoyl-sn-glycerophosphatidylethanolamine; LPE(16:0); LPE(16:0)	Glycerophospholipids [GP]	Glycerophosphoethanolamines [GP02]	Monoacylglycerophosphoethanolamines [GP0205]	LPE 16:0
pos_1114	N-Docosahexaenoyl phenylalanine	LMFA08020094	N-docosahexaenoyl phenylalanine	N-(4Z,7Z,10Z,12E,16Z,19Z-docosahexaenoyl)-phenylalanine	-	Fatty Acyls [FA]	Fatty amides [FA08]	N-acyl amines [FA0802]	NA 31:11;O2
pos_112	Hyacinthin	LMPK12010139	Hyacinthin	Cyanidin 3-(6-O-p-coumarylglucoside)	-	Polyketides [PK]	Flavonoids [PK12]	Anthocyanidins [PK1201]	-
pos_1124	Butenylcarnitine	LMFA07070053	Butenylcarnitine	(3S)-3-[(2E)-but-2-enoyloxy]-4-(trimethylazaniumyl)butanoate	-	Fatty Acyls [FA]	Fatty esters [FA07]	Fatty acyl carnitines [FA0707]	CAR 4:1
pos_1125	PS(18:1(9Z)/18:2(9Z,12Z))	LMGP03010958	PS(18:1(9Z)/18:2(9Z,12Z))	1-(9Z-octadecenoyl)-2-(9Z,12Z-octadecadienoyl)-glycero-3-phosphoserine	PS(36:3); PS(18:1_18:2)	Glycerophospholipids [GP]	Glycerophosphoserines [GP03]	Diacylglycerophosphoserines [GP0301]	PS 36:3
pos_114	1-Hydroxy-2-(beta-D-glucosyloxy)-9,10-anthraquinone	LMFA13010061	1-hydroxy-2-(beta-D-glucosyloxy)-9,10-anthraquinone	1-hydroxy-2-(beta-D-glucopyranosyloxy)-9,10-anthraquinone	1,2-dihydroxy-9,10-anthraquinone 2-O-beta-D-glucopyranoside;1-hydroxy-2-(beta-D-glucosyloxy)-9,10-anthraquinone;1-hydroxy-9,10-dioxo-9,10-dihydroanthracen-2-yl beta-D-glucopyranoside;2-(beta-D-glucopyranosyloxy)-1-hydroxy-9,10-anthracenedione;2-alizarin-beta-D-glucoside;alizarin-2-beta-D-glucopyranoside	Fatty Acyls [FA]	Fatty acyl glycosides [FA13]	Fatty acyl glycosides of mono- and disaccharides [FA1301]	-
pos_1143	PE(15:0/20:2(11Z,14Z))	LMGP02010465	PE(15:0/20:2(11Z,14Z))	1-pentadecanoyl-2-(11Z,14Z-eicosadienoyl)-glycero-3-phosphoethanolamine	PE(35:2); PE(15:0_20:2)	Glycerophospholipids [GP]	Glycerophosphoethanolamines [GP02]	Diacylglycerophosphoethanolamines [GP0201]	PE 35:2
pos_1146	Norethindrone	LMST02030097	Norethindrone	17alpha-hydroxy-19-norpregn-4-en-20-yn-3-one	-	Sterol Lipids [ST]	Steroids [ST02]	C21 steroids (gluco/mineralocorticoids, progestogins) and derivatives [ST0203]	ST 20:4;O2
pos_1148	Corticosterone	LMST02030186	corticosterone	11beta,21-dihydroxypregn-4-ene-3,20-dione	(11beta)-11,21-dihydroxypregn-4-ene-3,20-dione; 11beta,21-Dihydroxy-4-pregnene-3,20-dione; 11beta,21-dihydroxyprogesterone; 17-deoxycortisol; CORTICOSTERONE; Corticosterone; Kendall's compound B; Reichstein's substance H; corticosterone	Sterol Lipids [ST]	Steroids [ST02]	C21 steroids (gluco/mineralocorticoids, progestogins) and derivatives [ST0203]	ST 21:3;O4
pos_115	PA(P-16:0/14:0)	LMGP10030003	PA(P-16:0/14:0)	1-(1Z-hexadecenyl)-2-tetradecanoyl-glycero-3-phosphate	PA(P-30:0); PA(P-16:0/14:0)	Glycerophospholipids [GP]	Glycerophosphates [GP10]	1-(1Z-alkenyl),2-acylglycerophosphates [GP1003]	PA O-30:1
pos_1150	1-Acetoxy-2-hydroxy-16-heptadecen-4-one	LMFA05000594	1-Acetoxy-2-hydroxy-16-heptadecen-4-one	2-hydroxy-4-oxoheptadec-16-en-1-yl acetate	-	Fatty Acyls [FA]	Fatty alcohols [FA05]	-	FOH 19:3;O3
pos_1155	5b-Cholestane-3a,7a,12a,23S,25-pentol	LMST01010241	-	5b-Cholestane-3a,7a,12a,23S,25-pentol	-	Sterol Lipids [ST]	Sterols [ST01]	Cholesterol and derivatives [ST0101]	ST 27:0;O5
pos_1158	Withanolide A	LMST01160019	Withanolide A	15-[1-(4,5-dimethyl-6-oxo-3,6-dihydro-2H-pyran-2-yl)-1-hydroxyethyl]-5-hydroxy-10,14-dimethyl-3-oxapentacyclo[9.7.0.0^{2,4}.0^{5,10}.0^{14,18}]octadec-7-en-9-one	-	Sterol Lipids [ST]	Sterols [ST01]	Withanolides and derivatives [ST0116]	ST 28:6;O6
pos_116	Isobutyl 2-furanpropionate	LMFA07010915	Isobutyl 2-furanpropionate	2-methylpropyl 3-(furan-2-yl)propanoate	-	Fatty Acyls [FA]	Fatty esters [FA07]	Wax monoesters [FA0701]	WE 11:3;O
pos_1161	PS(18:0/18:3(9Z,12Z,15Z))	LMGP03010316	PS(18:0/18:3(9Z,12Z,15Z))	1-octadecanoyl-2-(9Z,12Z,15Z-octadecatrienoyl)-glycero-3-phosphoserine	PS(36:3); PS(18:0_18:3)	Glycerophospholipids [GP]	Glycerophosphoserines [GP03]	Diacylglycerophosphoserines [GP0301]	PS 36:3
pos_1168	PA(16:0/18:2(9Z,12Z))	LMGP10010023	PA(16:0/18:2(9Z,12Z))	1-hexadecanoyl-2-(9Z,12Z-octadecadienoyl)-sn-glycero-3-phosphate	9,12-Octadecadienoic acid (Z,Z)-, 1-[[(1-oxohexadecyl)oxy]methyl]-2-(phosphonooxy)ethyl ester, (R)-; 1-Palmitoyl-2-linoleoyl-sn-glycero-3-phosphate; PA(16:0/18:2); PA(34:2); PA(16:0_18:2)	Glycerophospholipids [GP]	Glycerophosphates [GP10]	Diacylglycerophosphates [GP1001]	PA 34:2
pos_1169	Testosterone	LMST02020002	Testosterone	17beta-hydroxyandrost-4-en-3-one	-	Sterol Lipids [ST]	Steroids [ST02]	C19 steroids (androgens) and derivatives [ST0202]	ST 19:2;O2
pos_117	4'-METHOXYCHALCONE	LMPK12120188	-	4'-Methoxychalcone	-	Polyketides [PK]	Flavonoids [PK12]	Chalcones and dihydrochalcones [PK1212]	-
pos_1170	27-Nor-5b-cholestane-3a,7a,12a,24,25-pentol	LMST01010213	27-Nor-cholestane-pentol	27-Nor-5b-cholestane-3a,7a,12a,24,25-pentol	-	Sterol Lipids [ST]	Sterols [ST01]	Cholesterol and derivatives [ST0101]	ST 26:0;O5
pos_1173	Hypusine	LMFA01050514	Hypusine	(2S)-2-amino-6-{[(2S)-4-amino-2-hydroxybutyl]amino}hexanoic acid	-	Fatty Acyls [FA]	Fatty Acids and Conjugates [FA01]	Hydroxy fatty acids [FA0105]	-
pos_1190	Isopersin	LMFA05000670	Isopersin	(12Z,15Z)-1-hydroxy-4-oxohenicosa-12,15-dien-2-yl acetate	-	Fatty Acyls [FA]	Fatty alcohols [FA05]	-	FOH 23:4;O3
pos_1191	4alpha-Carboxy-5alpha-cholesta-8-en-3beta-ol	LMST01010228	-	4alpha-carboxy-5alpha-cholesta-8-en-3beta-ol	-	Sterol Lipids [ST]	Sterols [ST01]	Cholesterol and derivatives [ST0101]	ST 28:2;O3
pos_1193	Glabrene	LMPK12080060	Glabrene	-	-	Polyketides [PK]	Flavonoids [PK12]	Isoflavans [PK1208]	-
pos_1204	Androsterone	LMST02020001	Androsterone	3alpha-hydroxy-5alpha-androstan-17-one	Androsterone	Sterol Lipids [ST]	Steroids [ST02]	C19 steroids (androgens) and derivatives [ST0202]	ST 19:1;O2
pos_1207	PC(18:4(6Z,9Z,12Z,15Z)/22:6(4Z,7Z,10Z,13Z,16Z,19Z))	LMGP01011730	PC(18:4(6Z,9Z,12Z,15Z)/22:6(4Z,7Z,10Z,13Z,16Z,19Z))	1-(6Z,9Z,12Z,15Z-octadecatetraenoyl)-2-(4Z,7Z,10Z,13Z,16Z,19Z-docosahexaenoyl)-glycero-3-phosphocholine	PC(40:10); PC(18:4_22:6)	Glycerophospholipids [GP]	Glycerophosphocholines [GP01]	Diacylglycerophosphocholines [GP0101]	PC 40:10
pos_1218	Cholesta-4,6-dien-3-one	LMST01010059	4,6-cholestadienone	cholesta-4,6-dien-3-one	-	Sterol Lipids [ST]	Sterols [ST01]	Cholesterol and derivatives [ST0101]	ST 27:3;O
pos_1219	2,4,7-Decatrienoic acid	LMFA01030962	2,4,7-Decatrienoic acid	(2E,4E,7E)-deca-2,4,7-trienoic acid	-	Fatty Acyls [FA]	Fatty Acids and Conjugates [FA01]	Unsaturated fatty acids [FA0103]	FA 10:3
pos_1234	Varanic acid	LMST04030067	Varanic acid	3alpha,7alpha,12alpha,24-Tetrahydroxy-5beta-cholestan-26-oic acid	-	Sterol Lipids [ST]	Bile acids and derivatives [ST04]	C27 bile acids, alcohols, and derivatives [ST0403]	ST 27:1;O6
pos_1248	Cerebroside B	LMSP05010133	Cerebroside B	N-(2-hydroxy-hexadecanoyl)-1-beta-glucosyl-9-methyl-sphinga-4E,8E-dienine	-	Sphingolipids [SP]	Neutral glycosphingolipids [SP05]	Simple Glc series [SP0501]	HexCer 35:2;O3
pos_1252	Docosahexaenoic acid	LMFA01031176	-	5Z,8Z,11Z,14Z,17Z,20Z-docosahexaenoic acid	Docosahexaenoic acid; C22:6n-2,5,8,11,14,17;Docosahexaenoate;5Z,8Z,11Z,14Z,17Z,20Z-docosahexaenoate	Fatty Acyls [FA]	Fatty Acids and Conjugates [FA01]	Unsaturated fatty acids [FA0103]	FA 22:6
pos_1253	Prostaglandin H1	LMFA03010044	PGH1	9S,11R-epidioxy-15S-hydroxy-13E-prostaenoic acid	Prostaglandin H1	Fatty Acyls [FA]	Eicosanoids [FA03]	Prostaglandins [FA0301]	FA 20:3;O3
pos_1256	Dehydrophytosphingosine	LMSP01030002	Dehydrophytosphingosine	4R-hydroxysphing-8E-enine	4-hydroxy-8-sphingenine	Sphingolipids [SP]	Sphingoid bases [SP01]	4-Hydroxysphinganines (Phytosphingosines) [SP0103]	SPB 18:1;O3
pos_1257	PE(20:1(11Z)/22:6(4Z,7Z,10Z,13Z,16Z,19Z))	LMGP02010870	PE(20:1(11Z)/22:6(4Z,7Z,10Z,13Z,16Z,19Z))	1-(11Z-eicosenoyl)-2-(4Z,7Z,10Z,13Z,16Z,19Z-docosahexaenoyl)-glycero-3-phosphoethanolamine	PE(42:7); PE(20:1_22:6)	Glycerophospholipids [GP]	Glycerophosphoethanolamines [GP02]	Diacylglycerophosphoethanolamines [GP0201]	PE 42:7
pos_1265	11-Keto-beta-boswellic acid	LMPR0106180008	11-Keto-beta-boswellic acid	(4R)-3alpha-hydroxy-11-oxo-urs-12-en-23-oic acid	-	Prenol Lipids [PR]	Isoprenoids [PR01]	C30 isoprenoids (triterpenes) [PR0106]	-
pos_1270	PC(14:1(9Z)/22:5(4Z,7Z,10Z,13Z,16Z))	LMGP01012134	PC(14:1(9Z)/22:5(4Z,7Z,10Z,13Z,16Z))	1-(9Z-tetradecenoyl)-2-(4Z,7Z,10Z,13Z,16Z-docosapentaenoyl)-sn-glycero-3-phosphocholine	PC(36:6); PC(14:1_22:5)	Glycerophospholipids [GP]	Glycerophosphocholines [GP01]	Diacylglycerophosphocholines [GP0101]	PC 36:6
pos_1282	Dolichyl diphosphate	LMPR03090023	dolichyl diphosphate	alpha-(3-methylbut-2-en-1-yl)-omega-(4-{[hydroxy(phosphonooxy)phosphoryl]oxy}-2-methylbutyl)poly[(2E)-2-methylbut-2-ene-1,4-diyl]	Dolichol diphosphate; Dolichol pyrophosphate; Dolichyl diphosphate; Dolichyl pyrophosphate	Prenol Lipids [PR]	Polyprenols [PR03]	Dolichol diphosphates [PR0309]	-
pos_1289	Licorisoflavan A	LMPK12080046	7-O-Methyllicoricidin	(+)-2',4'-Dihydroxy-5,7-dimethoxy-6,3'-diprenylisoflavan	Licorisoflavan A	Polyketides [PK]	Flavonoids [PK12]	Isoflavans [PK1208]	-
pos_129	Gibberellin A24	LMPR0104170018	Gibberellin A24	-	-	Prenol Lipids [PR]	Isoprenoids [PR01]	C20 isoprenoids (diterpenes) [PR0104]	-
pos_1291	3-Methyl-5-pentyl-2-furanundecanoic acid	LMFA01150013	11-(3-methyl-5-pentylfuran-2-yl)-undecanoic acid	11-(5-pentyl-3-methylfuran-2-yl)-undecanoic acid	11M5; MeF(11,5); 3-methyl-5-pentyl-2-furanundecanoic acid	Fatty Acyls [FA]	Fatty Acids and Conjugates [FA01]	Heterocyclic fatty acids [FA0115]	FA 21:3;O
pos_1295	PE(20:3(8Z,11Z,14Z)/22:0)	LMGP02010928	PE(20:3(8Z,11Z,14Z)/22:0)	1-(8Z,11Z,14Z-eicosatrienoyl)-2-docosanoyl-glycero-3-phosphoethanolamine	PE(42:3); PE(20:3_22:0)	Glycerophospholipids [GP]	Glycerophosphoethanolamines [GP02]	Diacylglycerophosphoethanolamines [GP0201]	PE 42:3
pos_130	Lecanoric acid	LMPK13080001	Lecanoric acid	-	-	Polyketides [PK]	Aromatic polyketides [PK13]	Depsides and depsidones [PK1308]	-
pos_1301	PS(14:1(9Z)/18:2(9Z,12Z))	LMGP03010121	PS(14:1(9Z)/18:2(9Z,12Z))	1-(9Z-tetradecenoyl)-2-(9Z,12Z-octadecadienoyl)-glycero-3-phosphoserine	PS(32:3); PS(14:1_18:2)	Glycerophospholipids [GP]	Glycerophosphoserines [GP03]	Diacylglycerophosphoserines [GP0301]	PS 32:3
pos_1311	1-Deoxy-D-glucitol	LMFA05000598	1-Deoxy-D-glucitol	hexane-1,2,3,4,5-pentol	-	Fatty Acyls [FA]	Fatty alcohols [FA05]	-	FOH 6:0;O4
pos_1312	8-Hydroxyluteolin 4'-methyl ether 8-glucuronide	LMPK12111385	8-Hydroxyluteolin 4'-methyl ether 8-glucuronide	-	-	Polyketides [PK]	Flavonoids [PK12]	Flavones and Flavonols [PK1211]	-
pos_1314	Panaxydol	LMFA05000028	Panaxydol	9,10-epoxy-1-heptadecen-4,6-diyn-3-ol	9,10-epoxy-heptadeca-1-en-4,6-diyn-3-ol	Fatty Acyls [FA]	Fatty alcohols [FA05]	-	FOH 17:6;O
pos_1334	1,24-Tetracosanediol	LMFA05000580	1,24-Tetracosanediol	tetracosane-1,24-diol	-	Fatty Acyls [FA]	Fatty alcohols [FA05]	-	FOH 24:0;O
pos_1339	PE(18:3(6Z,9Z,12Z)/20:5(5Z,8Z,11Z,14Z,17Z))	LMGP02010703	PE(18:3(6Z,9Z,12Z)/20:5(5Z,8Z,11Z,14Z,17Z))	1-(6Z,9Z,12Z-octadecatrienoyl)-2-(5Z,8Z,11Z,14Z,17Z-eicosapentaenoyl)-glycero-3-phosphoethanolamine	PE(38:8); PE(18:3_20:5)	Glycerophospholipids [GP]	Glycerophosphoethanolamines [GP02]	Diacylglycerophosphoethanolamines [GP0201]	PE 38:8
pos_1355	Stearic acid	LMFA01010018	Stearic acid	octadecanoic acid	Cetylacetic acid; Stearate; n-Octadecanoic acid; Octadecanoate; C18:0; Lactaric acid; Talgic acid; Bassinic acid; Stearophanic acid	Fatty Acyls [FA]	Fatty Acids and Conjugates [FA01]	Straight chain fatty acids [FA0101]	FA 18:0
pos_1383	3-Hexaprenyl-4-hydroxybenzoic acid	LMPR02010045	-	3-Hexaprenyl-4-hydroxybenzoic acid	-	Prenol Lipids [PR]	Quinones and hydroquinones [PR02]	Ubiquinones [PR0201]	-
pos_14	Decanoic acid	LMFA01010010	Capric acid	Decanoic acid	C10:0; Caprinic acid; Decoic acid; Decylic acid	Fatty Acyls [FA]	Fatty Acids and Conjugates [FA01]	Straight chain fatty acids [FA0101]	FA 10:0
pos_1406	Patuletin 3-gentiobioside	LMPK12112893	Patuletin 3-gentiobioside	-	-	Polyketides [PK]	Flavonoids [PK12]	Flavones and Flavonols [PK1211]	-
pos_1407	21-Deoxycortisol	LMST02030195	21-Deoxycortisol	11beta,17alpha-dihydroxypregn-4-ene-3,20-dione	-	Sterol Lipids [ST]	Steroids [ST02]	C21 steroids (gluco/mineralocorticoids, progestogins) and derivatives [ST0203]	ST 21:3;O4
pos_142	Kazinol E	LMPK12020237	Kazinol E	-	-	Polyketides [PK]	Flavonoids [PK12]	Flavans, Flavanols and Leucoanthocyanidins [PK1202]	-
pos_1423	PI(16:0/20:2(11Z,14Z))	LMGP06010165	PI(16:0/20:2(11Z,14Z))	1-hexadecanoyl-2-(11Z,14Z-eicosadienoyl)-glycero-3-phospho-(1'-myo-inositol)	PI(36:2); PI(16:0_20:2)	Glycerophospholipids [GP]	Glycerophosphoinositols [GP06]	Diacylglycerophosphoinositols [GP0601]	PI 36:2
pos_1430	PC(20:4(5Z,8Z,11Z,14Z)/18:0)	LMGP01011907	PC(20:4(5Z,8Z,11Z,14Z)/18:0)	1-(5Z,8Z,11Z,14Z-eicosatetraenoyl)-2-octadecanoyl-glycero-3-phosphocholine	PC(38:4); PC(18:0_20:4)	Glycerophospholipids [GP]	Glycerophosphocholines [GP01]	Diacylglycerophosphocholines [GP0101]	PC 38:4
pos_1442	DG(16:0/18:1(11Z)/0:0)	LMGL02010307	DG(16:0/18:1(11Z)/0:0)	1-hexadecanoyl-2-(11Z-octadecenoyl)-sn-glycerol	DG(16:0/18:1/0:0)	Glycerolipids [GL]	Diradylglycerols [GL02]	Diacylglycerols [GL0201]	DG 34:1
pos_1447	3-alpha-Androstanediol glucuronide	LMST05010039	3-alpha-androstanediol glucuronide	-	-	Sterol Lipids [ST]	Steroid conjugates [ST05]	Glucuronides [ST0501]	ST 19:0;O2;GlcA
pos_1467	Cholic acid glucuronide	LMST05010044	Cholic acid glucuronide	3alpha-[(beta-D-Glucopyranuronosyl)oxy]-7alpha,12alpha-dihydroxy-5beta-cholanoic acid	-	Sterol Lipids [ST]	Steroid conjugates [ST05]	Glucuronides [ST0501]	ST 24:1;O5;GlcA
pos_147	Dehydroabietic acid	LMPR0104050005	Dehydroabietic acid	-	-	Prenol Lipids [PR]	Isoprenoids [PR01]	C20 isoprenoids (diterpenes) [PR0104]	-
pos_1477	Resolvin D5	LMFA04030003	Resolvin D5	7S,17S-dihydroxy-4Z,8E,10Z,13Z,15E,19Z-docosahexaenoic acid	-	Fatty Acyls [FA]	Docosanoids [FA04]	Resolvin Ds [FA0403]	FA 22:6;O2
pos_148	Manumycin A	LMFA08020185	manumycin	(2E,4E,6R)-N-[(1S,5S,6R)-5-hydroxy-5-[(1E,3E,5E)-7-[(2-hydroxy-5-oxo-cyclopenten-1-yl)amino]-7-oxo-hepta-1,3,5-trienyl]-2-oxo-7-oxabicyclo[4.1.0]hept-3-en-3-yl]-2,4,6-trimethyl-deca-2,4-dienamide	Manumycin A; Ucfi-C; AC1O5PHE	Fatty Acyls [FA]	Fatty amides [FA08]	N-acyl amines [FA0802]	-
pos_1480	Mesterolone	LMST02020107	Mesterolone	-	-	Sterol Lipids [ST]	Steroids [ST02]	C19 steroids (androgens) and derivatives [ST0202]	ST 20:1;O2
pos_1489	Docosanamide	LMFA08010020	Docosanamide	docosanamide	-	Fatty Acyls [FA]	Fatty amides [FA08]	Primary amides [FA0801]	-
pos_1490	Tetrahydropersin	LMFA05000700	Tetrahydropersin	2-hydroxy-4-oxohenicosyl acetate	-	Fatty Acyls [FA]	Fatty alcohols [FA05]	-	FOH 23:2;O3
pos_1499	Flavone	LMPK12110097	Flavone	-	-	Polyketides [PK]	Flavonoids [PK12]	Flavones and Flavonols [PK1211]	-
pos_1503	PE(22:2(13Z,16Z)/22:6(4Z,7Z,10Z,13Z,16Z,19Z))	LMGP02011101	PE(22:2(13Z,16Z)/22:6(4Z,7Z,10Z,13Z,16Z,19Z))	1-(13Z,16Z-docosadienoyl)-2-(4Z,7Z,10Z,13Z,16Z,19Z-docosahexaenoyl)-glycero-3-phosphoethanolamine	PE(44:8); PE(22:2_22:6)	Glycerophospholipids [GP]	Glycerophosphoethanolamines [GP02]	Diacylglycerophosphoethanolamines [GP0201]	PE 44:8
pos_151	Moronic acid	LMPR0106150002	Moronic acid	3-oxoolean-18-en-28-oic acid	-	Prenol Lipids [PR]	Isoprenoids [PR01]	C30 isoprenoids (triterpenes) [PR0106]	-
pos_153	Ursolic acid	LMPR0106180007	ursolic acid	3beta-hydroxyurs-12-en-28-oic acid	(3beta)-3-hydroxyurs-12-en-28-oic acid; Ursolic acid; malol; prunol; urson	Prenol Lipids [PR]	Isoprenoids [PR01]	C30 isoprenoids (triterpenes) [PR0106]	-
pos_1554	2-Hydroxylauroylcarnitine	LMFA07070032	2-Hydroxylauroylcarnitine	3-[(2-hydroxydodecanoyl)oxy]-4-(trimethylazaniumyl)butanoate	-	Fatty Acyls [FA]	Fatty esters [FA07]	Fatty acyl carnitines [FA0707]	CAR 12:0;O
pos_1557	Mesuagin	LMPK12100030	Mesuagin	5-Hydroxy-6'',6''-dimethyl-6-isobutyryl-4-phenylpyrano[2'',3'':7,8]coumarin	-	Polyketides [PK]	Flavonoids [PK12]	Neoflavonoids [PK1210]	-
pos_157	3,6,9,12,15-octadecapentaenoic acid	LMFA01030359	3,6,9,12,15-octadecapentaenoic acid	3,6,9,12,15-octadecapentaenoic acid	C18:5n-3,6,9,12,15	Fatty Acyls [FA]	Fatty Acids and Conjugates [FA01]	Unsaturated fatty acids [FA0103]	FA 18:5
pos_1570	Panaxynol	LMFA05000689	Falcarinol	1,9Z-heptadecadien-4,6-diyn-3R-ol	Panaxynol; CHEBI:66722; (3R,9Z)-heptadeca-1,9-dien-4,6-diyn-3-ol; 1,9-Heptadecadiene-4,6-diyn-3-ol	Fatty Acyls [FA]	Fatty alcohols [FA05]	-	FOH 17:6
pos_1577	Octadecyl fumarate	LMFA07010979	Octadecyl fumarate	(2Z)-4-(octadecyloxy)-4-oxobut-2-enoic acid	-	Fatty Acyls [FA]	Fatty esters [FA07]	Wax monoesters [FA0701]	WE 22:2;O2
pos_1579	Ginsenoside Rh1	LMPR0106080017	Ginsenoside Rh1	3beta,12beta,20-trihydroxydammar-24-en-6alpha-yl-beta-D-glucopyranoside	20(S)-Ginsenoside Rh1; Prosapogenin A2; Sanchinoside Rh1	Prenol Lipids [PR]	Isoprenoids [PR01]	C30 isoprenoids (triterpenes) [PR0106]	-
pos_1590	D-Leucic acid	LMFA01050402	D-Leucic acid	2R-hydroxy-4-methyl-pentanoic acid	-	Fatty Acyls [FA]	Fatty Acids and Conjugates [FA01]	Hydroxy fatty acids [FA0105]	FA 6:0;O
pos_1593	PG(16:0/18:2(9Z,12Z))	LMGP04010983	PG(16:0/18:2(9Z,12Z))	1-hexadecanoyl-2-(9Z,12Z-octadecadienoyl)-glycero-3-phospho-(1'-sn-glycerol)	PG(34:2); PG(16:0_18:2)	Glycerophospholipids [GP]	Glycerophosphoglycerols [GP04]	Diacylglycerophosphoglycerols [GP0401]	PG 34:2
pos_1601	Prostaglandin E1	LMFA03010134	PGE1	9-oxo-11R,15S-dihydroxy-13E-prostaenoic acid	Prostaglandin E1	Fatty Acyls [FA]	Eicosanoids [FA03]	Prostaglandins [FA0301]	FA 20:3;O3
pos_1603	1-heneicosanoyl-glycero-3-phosphate	LMGP10050032	PA(21:0/0:0)	1-heneicosanoyl-glycero-3-phosphate	LPA(21:0)	Glycerophospholipids [GP]	Glycerophosphates [GP10]	Monoacylglycerophosphates [GP1005]	LPA 21:0
pos_1604	PS(20:3(8Z,11Z,14Z)/18:0)	LMGP03010600	PS(20:3(8Z,11Z,14Z)/18:0)	1-(8Z,11Z,14Z-eicosatrienoyl)-2-octadecanoyl-glycero-3-phosphoserine	PS(38:3); PS(18:0_20:3)	Glycerophospholipids [GP]	Glycerophosphoserines [GP03]	Diacylglycerophosphoserines [GP0301]	PS 38:3
pos_1607	Naringenin	LMPK12140001	Naringenin	-	-	Polyketides [PK]	Flavonoids [PK12]	Flavanones [PK1214]	-
pos_1617	3a,20b-Pregnanediol	LMST02030198	-	3a,20b-Pregnanediol	-	Sterol Lipids [ST]	Steroids [ST02]	C21 steroids (gluco/mineralocorticoids, progestogins) and derivatives [ST0203]	ST 21:0;O2
pos_1623	Nonivamide	LMFA08020317	Nonivamide	N-vanillyl-nonamide	pelargonic acid vanillylamide; PAVA	Fatty Acyls [FA]	Fatty amides [FA08]	N-acyl amines [FA0802]	NA 17:4;O2
pos_1633	Tetracosahexaenoic acid	LMFA01030804	tetracosahexaenoic acid	2E,4E,6E,8E,10E,12E-tetracosahexaenoic acid	C24:6n-12,14,16,18,20,22	Fatty Acyls [FA]	Fatty Acids and Conjugates [FA01]	Unsaturated fatty acids [FA0103]	FA 24:6
pos_1637	Jurubine	LMST01070002	Jurubine	3beta-amino-26-O-[beta-D-glucopyranosyl]-25R-furostan-22alpha,26-diol	-	Sterol Lipids [ST]	Sterols [ST01]	Furostanols and derivatives [ST0107]	-
pos_1638	Medroxyprogesterone	LMST02030176	medroxyprogesterone	(6alpha)-17-hydroxy-6-methylpregn-4-ene-3,20-dione	17-Hydroxy-6alpha-methyl-pregn-4-ene-3,20-dione; 17-Hydroxy-6alpha-methylprogesterone; 17alpha-Hydroxy-6alpha-methylprogesterone; 6alpha-Methyl-17alpha-hydroxyprogesterone; 6alpha-Methyl-4-pregnen-17alpha-ol-3,20-dione; Medroxyprogesteron	Sterol Lipids [ST]	Steroids [ST02]	C21 steroids (gluco/mineralocorticoids, progestogins) and derivatives [ST0203]	ST 22:3;O3
pos_1659	2-Propenyl cyclohexanehexanoate	LMFA07010744	2-Propenyl cyclohexanehexanoate	prop-2-en-1-yl 6-cyclohexylhexanoate	-	Fatty Acyls [FA]	Fatty esters [FA07]	Wax monoesters [FA0701]	WE 15:2
pos_166	Maslinic Acid	LMPR0106180014	Maslinic acid	2alpha,3beta-dihydroxyurs-12-en-29-oic acid	-	Prenol Lipids [PR]	Isoprenoids [PR01]	C30 isoprenoids (triterpenes) [PR0106]	-
pos_1664	PC(15:0/15:0)	LMGP01010530	PC(15:0/15:0)	1,2-dipentadecanoyl-sn-glycero-3-phosphocholine	Pentadecanoin, 1,2-di-, phosphate, ester with choline, L-; 1,2-Dipentadecanoyl-sn-glycero-3-phosphocholine; L-alpha-Dipentadecanoyl phosphatidylcholine; PC(30:0); PC(15:0_15:0)	Glycerophospholipids [GP]	Glycerophosphocholines [GP01]	Diacylglycerophosphocholines [GP0101]	PC 30:0
pos_1684	PC(14:1(9Z)/22:1(13Z))	LMGP01012133	PC(14:1(9Z)/22:1(13Z))	1-(9Z-tetradecenoyl)-2-(13Z-docosenoyl)-sn-glycero-3-phosphocholine	PC(36:2); PC(14:1_22:1)	Glycerophospholipids [GP]	Glycerophosphocholines [GP01]	Diacylglycerophosphocholines [GP0101]	PC 36:2
pos_1705	11,14,17-Eicosatrienoic acid	LMFA01030159	11,14,17-eicosatrienoic acid	11,14,17-eicosatrienoic acid	11, 14, 17-icosatrienoic acid; C20:3n-3,6,9	Fatty Acyls [FA]	Fatty Acids and Conjugates [FA01]	Unsaturated fatty acids [FA0103]	FA 20:3
pos_1714	Arachidonic acid	LMFA01030001	Arachidonic acid	5Z,8Z,11Z,14Z-eicosatetraenoic acid	5Z,8Z,11Z,14Z-icosatetraenoic acid; AA; Arachidonate; cis-5,8,11,14-Eicosatetraenoic acid; (all-Z)-5,8,11,14-Eicosatetraenoic acid; all-cis-5,8,11,14-Eicosatetraenoic acid	Fatty Acyls [FA]	Fatty Acids and Conjugates [FA01]	Unsaturated fatty acids [FA0103]	FA 20:4
pos_1741	SM(d18:0/26:1(17Z))	LMSP03010025	SM(d18:0/26:1(17Z))	N-(17Z-hexacosenoyl)-sphinganine-1-phosphocholine	C26:1DH Sphingomyelin	Sphingolipids [SP]	Phosphosphingolipids [SP03]	Ceramide phosphocholines (sphingomyelins) [SP0301]	SM 44:1;O2
pos_1752	Alpha-Tocotrienol	LMPR02020054	alpha-tocotrienol	2R,5,7,8-tetramethyl-2-[(3E,7E)-4,8,12-trimethyltrideca-3,7,11-trien-1-yl]-3,4-dihydro-2H-chromen-6-ol	alpha-tocotrienol; zeta1-tocopherol	Prenol Lipids [PR]	Quinones and hydroquinones [PR02]	Vitamin E [PR0202]	-
pos_1763	Maysin	LMPK12110512	Maysin	-	-	Polyketides [PK]	Flavonoids [PK12]	Flavones and Flavonols [PK1211]	-
pos_177	Sorbaldehyde	LMFA06000006	Sorbaldehyde	2,4-hexadienal	Sorbic aldehyde	Fatty Acyls [FA]	Fatty aldehydes [FA06]	-	FAL 6:2
pos_178	Gibberellin A15	LMPR0104170017	Gibberellin A15	-	-	Prenol Lipids [PR]	Isoprenoids [PR01]	C20 isoprenoids (diterpenes) [PR0104]	-
pos_1783	Farnesyl pyrophosphate	LMPR0103010002	Farnesyl diphosphate	Farnesyl pyrophosphate	-	Prenol Lipids [PR]	Isoprenoids [PR01]	C15 isoprenoids (sesquiterpenes) [PR0103]	-
pos_1787	Calenduloside E	LMPR0106150003	oleanolic acid 3-O-beta-D-glucosiduronic acid	28-hydroxy-28-oxoolean-12-en-3beta-yl beta-D-glucopyranosiduronic acid	3-O-(beta-D-Glucopyranuronosyl)oleanolic acid; Calenduloside E; Glycoside St-E; Momordin Ib; Oleanoic acid 3-O-glucuronide; Polysciasaponin P7; Silphioside F; oleanolic acid 3-O-glucuronide	Prenol Lipids [PR]	Isoprenoids [PR01]	C30 isoprenoids (triterpenes) [PR0106]	-
pos_179	Cyclokievitone	LMPK12050493	Cyclokievitone	-	-	Polyketides [PK]	Flavonoids [PK12]	Isoflavonoids [PK1205]	-
pos_1795	PI(16:0/16:1(9Z))	LMGP06010881	PI(16:0/16:1(9Z))	1-hexadecanoyl-2-(9Z-hexadecenoyl)-glycero-3-phospho-(1'-myo-inositol)	PI(32:1); PI(16:0_16:1)	Glycerophospholipids [GP]	Glycerophosphoinositols [GP06]	Diacylglycerophosphoinositols [GP0601]	PI 32:1
pos_1799	Arjunolic acid	LMPR0106150023	Arjunolic acid	(2alpha,3beta,4alpha)-2,3,23-Trihydroxy-olean-12-en-28-oic acid	-	Prenol Lipids [PR]	Isoprenoids [PR01]	C30 isoprenoids (triterpenes) [PR0106]	-
pos_180	2,4,7-tridecatrienal	LMFA06000076	2,4,7-tridecatrienal	2,4,7-tridecatrienal	-	Fatty Acyls [FA]	Fatty aldehydes [FA06]	-	FAL 13:3
pos_1803	N,2,3-Trimethyl-2-(1-methylethyl)butanamide	LMFA08020189	N,2,3-Trimethyl-2-(1-methylethyl)butanamide	N,2,3-trimethyl-2-(propan-2-yl)butanamide	-	Fatty Acyls [FA]	Fatty amides [FA08]	N-acyl amines [FA0802]	NA 10:0
pos_1819	PS(14:0/18:3(9Z,12Z,15Z))	LMGP03010926	PS(14:0/18:3(9Z,12Z,15Z))	1-tetradecanoyl-2-(9Z,12Z,15Z-octadecatrienoyl)-glycero-3-phosphoserine	PS(32:3); PS(14:0_18:3)	Glycerophospholipids [GP]	Glycerophosphoserines [GP03]	Diacylglycerophosphoserines [GP0301]	PS 32:3
pos_1844	Vitamin K1	LMPR02030028	phylloquinone	2-methyl-3-[(2E,7R,11R)-3,7,11,15-tetramethylhexadec-2-en-1-yl]naphthalene-1,4-dione	2-Methyl-3-phytyl-1,4-naphthoquinone; PHYLLOQUINONE; Phylloquinone; Phytonadione; Vitamin K1	Prenol Lipids [PR]	Quinones and hydroquinones [PR02]	Vitamin K [PR0203]	-
pos_1859	Rhamnazin 3-rutinoside	LMPK12112634	Rhamnazin 3-rutinoside	-	-	Polyketides [PK]	Flavonoids [PK12]	Flavones and Flavonols [PK1211]	-
pos_186	4-[5]-ladderane-butanoic acid	LMFA01140011	4-[5]-ladderane-butanoic acid	4-[5]-ladderane-butanoic acid	-	Fatty Acyls [FA]	Fatty Acids and Conjugates [FA01]	Carbocyclic fatty acids [FA0114]	FA 16:5
pos_1863	1-hexadecyl-glycero-3-phosphate	LMGP10060005	PA(O-16:0/0:0)	1-hexadecyl-glycero-3-phosphate	PA(O-16:0); PA(O-16:0_0:0)	Glycerophospholipids [GP]	Glycerophosphates [GP10]	Monoalkylglycerophosphates [GP1006]	LPA O-16:0
pos_1865	PC(18:1(9Z)/18:1(9Z))	LMGP01010890	PC(18:1(9Z)/18:1(9Z))	1,2-di-(9Z-octadecenoyl)-sn-glycero-3-phosphocholine	Dioleoyl phosphatidylcholine; DOPC; Choline phosphate, 3-ester with L-1,2-diolein;Olein, 1,2-di-, L-, dihydrogen phosphate, monoester with choline hydroxide; 1,2-Dioleoyl-L-alpha-lecithin; 1,2-dioleoyl-sn-glycero-3-phosphocholine; PC(18:1/18:1); PC(36:2); PC(18:1/18:1)	Glycerophospholipids [GP]	Glycerophosphocholines [GP01]	Diacylglycerophosphocholines [GP0101]	PC 36:2
pos_1868	16-Ketoestradiol	LMST02010047	16-Ketoestradiol	-	-	Sterol Lipids [ST]	Steroids [ST02]	C18 steroids (estrogens) and derivatives [ST0201]	ST 18:4;O3
pos_187	2-Hydroxyhomopterocarpin	LMPK12070065	2-Hydroxyhomopterocarpin	-	-	Polyketides [PK]	Flavonoids [PK12]	Pterocarpans [PK1207]	-
pos_1876	PGP(16:0/18:1(11Z))	LMGP05010002	PGP(16:0/18:1(11Z))	1-hexadecanoyl-2-(11Z-octadecenoyl)-sn-glycero-3-phospho-(1'-sn-glycerol-3'-phosphate)	PGP(16:0/18:1); PGP(34:1); PGP(16:0_18:1)	Glycerophospholipids [GP]	Glycerophosphoglycerophosphates [GP05]	Diacylglycerophosphoglycerophosphates [GP0501]	PGP 34:1
pos_1898	PS(18:0/20:0)	LMGP03010962	PS(18:0/20:0)	1-octadecanoyl-2-eicosanoyl-glycero-3-phosphoserine	PS(38:0); PS(18:0_20:0)	Glycerophospholipids [GP]	Glycerophosphoserines [GP03]	Diacylglycerophosphoserines [GP0301]	PS 38:0
pos_1900	Prednisone	LMST02030180	prednisone	17,21-dihydroxypregna-1,4-diene-3,11,20-trione	1,2-Dehydrocortisone; 1,4-Pregnadiene-17alpha,21-diol-3,11,20-trione; 17,21-Dihydroxypregna-1,4-diene-3,11,20-trione; Prednisone	Sterol Lipids [ST]	Steroids [ST02]	C21 steroids (gluco/mineralocorticoids, progestogins) and derivatives [ST0203]	ST 21:5;O5
pos_1904	Linoleic acid	LMFA01030120	Linoleic acid	9Z,12Z-octadecadienoic acid	cis-9, cis-12-octadecadienoic acid; cis,cis-Linoleic acid; cis,cis-9,12-octadecadienoic acid; Linoleate; 9Z,12Z-Linoleic acid; Telfairic acid; C18:2n-6,9; Linolic acid; Leinolic acid	Fatty Acyls [FA]	Fatty Acids and Conjugates [FA01]	Unsaturated fatty acids [FA0103]	FA 18:2
pos_191	Pfaffic acid	LMPR0106250001	Pfaffic acid	-	-	Prenol Lipids [PR]	Isoprenoids [PR01]	C30 isoprenoids (triterpenes) [PR0106]	-
pos_1926	PG(16:1(9Z)/18:1(9Z))	LMGP04010902	PG(16:1(9Z)/18:1(9Z))	1-(9Z-hexadecenoyl)-2-(9Z-octadecenoyl)-glycero-3-phospho-(1'-sn-glycerol)	PG(34:2); PG(16:1_18:1)	Glycerophospholipids [GP]	Glycerophosphoglycerols [GP04]	Diacylglycerophosphoglycerols [GP0401]	PG 34:2
pos_1930	Cyanidin 3-(6''-p-coumarylsambubioside)	LMPK12010141	-	Cyanidin 3-(6''-p-coumarylsambubioside)	-	Polyketides [PK]	Flavonoids [PK12]	Anthocyanidins [PK1201]	-
pos_1940	Hydroxy-alpha-sanshool	LMFA08020326	Hydroxy-alpha-sanshool	2'-hydroxy-N-(isobutyl)-tetradeca-2E,6Z,8E,10E-tetraenamide	-	Fatty Acyls [FA]	Fatty amides [FA08]	N-acyl amines [FA0802]	NA 16:4;O
pos_195	(E,E)-3,7,11-Trimethyl-2,6,10-dodecatrienyl heptanoate	LMFA07010546	(E,E)-3,7,11-Trimethyl-2,6,10-dodecatrienyl heptanoate	(E,E)-3,7,11-Trimethyl-2,6,10-dodecatrienyl heptanoate	WE(12:3(2E,6E,10E)(3Me,7Me,11Me)/7:0)	Fatty Acyls [FA]	Fatty esters [FA07]	Wax monoesters [FA0701]	WE 22:3
pos_1956	Bisnorcholic acid	LMST04050005	Dinorcholic acid	24-dinor-3alpha,7alpha,12alpha-trihydroxy-5beta-cholan-22-oic acid	Bisnorcholic acid	Sterol Lipids [ST]	Bile acids and derivatives [ST04]	C22 bile acids, alcohols, and derivatives [ST0405]	ST 22:1;O5
pos_1963	PE(14:0/18:3(6Z,9Z,12Z))	LMGP02010412	PE(14:0/18:3(6Z,9Z,12Z))	1-tetradecanoyl-2-(6Z,9Z,12Z-octadecatrienoyl)-glycero-3-phosphoethanolamine	PE(32:3); PE(14:0_18:3)	Glycerophospholipids [GP]	Glycerophosphoethanolamines [GP02]	Diacylglycerophosphoethanolamines [GP0201]	PE 32:3
pos_1973	13-Oxo-9,11-tridecadienoic acid	LMFA01060202	13-Oxo-9,11-tridecadienoic acid	13-oxo-9E,11E-tridecadienoic acid	-	Fatty Acyls [FA]	Fatty Acids and Conjugates [FA01]	Oxo fatty acids [FA0106]	FA 13:3;O
pos_198	DIOSGENIN	LMST01080037	Diosgenin	(25R)-spirost-5-en-3beta-diol	-	Sterol Lipids [ST]	Sterols [ST01]	Spirostanols and derivatives [ST0108]	ST 27:3;O3
pos_1982	Prostaglandin E2	LMFA03010003	PGE2	9-oxo-11R,15S-dihydroxy-5Z,13E-prostadienoic acid	Prostaglandin E2; Dinoprostone; Prostin E2	Fatty Acyls [FA]	Eicosanoids [FA03]	Prostaglandins [FA0301]	FA 20:4;O3
pos_1983	CerP(d18:1/16:0)	LMSP02050002	CerP(d18:1/16:0)	N-(hexadecanoyl)-sphing-4-enine-1-phosphate	C16 CerP	Sphingolipids [SP]	Ceramides [SP02]	Ceramide 1-phosphates [SP0205]	CerP 34:1;O2
pos_199	alpha-curcumene	LMPR0103060015	alpha-curcumene	1-methyl-4-[(2R)-6-methylhept-5-en-2-yl]benzene	-	Prenol Lipids [PR]	Isoprenoids [PR01]	C15 isoprenoids (sesquiterpenes) [PR0103]	-
pos_200	10-propyl-5,9-tridecadien-1-ol	LMFA05000015	10-propyl-5,9-tridecadien-1-ol	10-propyl-5,9-tridecadien-1-ol	10-propyl-trideca-5,9-dien-1-ol	Fatty Acyls [FA]	Fatty alcohols [FA05]	-	FOH 16:2
pos_2020	Nandrolone	LMST02010044	nandrolone	17beta-hydroxyestr-4-en-3-one	(17beta)-17-hydroxyestr-4-en-3-one; 17beta-hydroxy-19-nor-4-androsten-3-one; 17beta-hydroxy-4-estren-3-one; 19-Norandrostenolone; 19-Nortestosterone; 4-estren-17beta-ol-3-one; Nandrolone	Sterol Lipids [ST]	Steroids [ST02]	C18 steroids (estrogens) and derivatives [ST0201]	ST 18:2;O2
pos_2026	7Z,10Z-Hexadecadienoic acid	LMFA01030807	7Z,10Z-hexadecadienoic acid	7Z,10Z-hexadecadienoic acid	C16:2n-6,9	Fatty Acyls [FA]	Fatty Acids and Conjugates [FA01]	Unsaturated fatty acids [FA0103]	FA 16:2
pos_2029	Cembrene	LMPR0104190002	Cembrene	-	-	Prenol Lipids [PR]	Isoprenoids [PR01]	C20 isoprenoids (diterpenes) [PR0104]	-
pos_203	Malvidin	LMPK12010004	Malvidin	-	-	Polyketides [PK]	Flavonoids [PK12]	Anthocyanidins [PK1201]	-
pos_2030	CerP(d18:0/16:0)	LMSP02050003	CerP(d18:0/16:0)	N-(hexadecanoyl)-sphinganine-1-phosphate	C16DH CerP; C16 dihydroceramide-1-phosphate; dihydroceramide phosphate	Sphingolipids [SP]	Ceramides [SP02]	Ceramide 1-phosphates [SP0205]	CerP 34:0;O2
pos_2035	PE(14:1(9Z)/22:2(13Z,16Z))	LMGP02010449	PE(14:1(9Z)/22:2(13Z,16Z))	1-(9Z-tetradecenoyl)-2-(13Z,16Z-docosadienoyl)-glycero-3-phosphoethanolamine	PE(36:3); PE(14:1_22:2)	Glycerophospholipids [GP]	Glycerophosphoethanolamines [GP02]	Diacylglycerophosphoethanolamines [GP0201]	PE 36:3
pos_2043	Jaceidin	LMPK12112999	Jaceidin	5,7,4'-Trihydroxy-3,6,3'-trimethoxyflavone	Quercetagetin 3,3',6-trimethyl ether	Polyketides [PK]	Flavonoids [PK12]	Flavones and Flavonols [PK1211]	-
pos_2049	2,4-Nonadien-1-ol	LMFA05000608	2,4-Nonadien-1-ol	(2E,4E)-nona-2,4-dien-1-ol	-	Fatty Acyls [FA]	Fatty alcohols [FA05]	-	FOH 9:2
pos_2054	Desmosterol	LMST01010016	Desmosterol	cholest-5,24-dien-3beta-ol	-	Sterol Lipids [ST]	Sterols [ST01]	Cholesterol and derivatives [ST0101]	ST 27:2;O
pos_2063	16-Oxoestrone	LMST02010048	16-Oxoestrone	-	-	Sterol Lipids [ST]	Steroids [ST02]	C18 steroids (estrogens) and derivatives [ST0201]	ST 18:5;O3
pos_2072	2-Hydroxyestradiol	LMST02010027	2-hydroxyestradiol	estra-1,3,5(10)-triene-2,3,17beta-triol	-	Sterol Lipids [ST]	Steroids [ST02]	C18 steroids (estrogens) and derivatives [ST0201]	ST 18:3;O3
pos_2074	Tauro-b-muricholic acid	LMST05040012	Tauro-b-muricholic acid	N-(3alpha,6beta,7beta-trihydroxy-5beta-cholan-24-oyl)-taurine	Tauro-b-muricholate	Sterol Lipids [ST]	Steroid conjugates [ST05]	Taurine conjugates [ST0504]	ST 24:1;O5;T
pos_2080	Isocarlinoside	LMPK12110489	Isocarlinoside	-	-	Polyketides [PK]	Flavonoids [PK12]	Flavones and Flavonols [PK1211]	-
pos_2107	hydroxyisovaleroyl carnitine	LMFA07070073	hydroxyisovaleroyl carnitine	3-hydroxy-3-isovaleryloxy-4-(trimethylammonio)butyrate	-	Fatty Acyls [FA]	Fatty esters [FA07]	Fatty acyl carnitines [FA0707]	CAR 5:0;O
pos_2119	PS(14:0/14:0)	LMGP03010028	PS(14:0/14:0)	1,2-ditetradecanoyl-sn-glycero-3-phosphoserine	Dimyristoyl phosphatidylserine; Serine, 2,3-bis[(1-oxotetradecyl)oxy]propyl hydrogen phosphate (ester), (R)-; DL-Serine, 2,3-bis[(1-oxotetradecyl)oxy]propyl hydrogen phosphate (ester), (R); PS(28:0); PS(14:0/14:0)	Glycerophospholipids [GP]	Glycerophosphoserines [GP03]	Diacylglycerophosphoserines [GP0301]	PS 28:0
pos_2120	Cyanidin 3-(6''-malonylglucoside)	LMPK12010135	-	Cyanidin 3-(6''-malonylglucoside)	Cyanidin-3-O-(6-O-malonyl-beta-D-glucopyranoside)	Polyketides [PK]	Flavonoids [PK12]	Anthocyanidins [PK1201]	-
pos_2122	6,7-dihydro-12-epi-LTB4	LMFA03020070	6,7-dihydro-12-epi-LTB4	(5R,8E,10E,12R,14Z)-5,12-dihydroxyicosa-8,10,14-trienoic acid	-	Fatty Acyls [FA]	Eicosanoids [FA03]	Leukotrienes [FA0302]	FA 20:3;O2
pos_2135	Aldosterone 18-glucuronide	LMST05010062	Aldosterone 18-glucuronide	(2S,3S,4S,5R,6S)-3,4,5-trihydroxy-6-{[(2S,14R,16R)-2-(2-hydroxyacetyl)-14-methyl-11-oxo-17-oxapentacyclo[14.2.1.0^{1,5}.0^{6,15}.0^{9,14}]nonadec-9-en-18-yl]oxy}oxane-2-carboxylic acid	-	Sterol Lipids [ST]	Steroid conjugates [ST05]	Glucuronides [ST0501]	ST 21:4;O5;GlcA
pos_2138	PS(16:0/18:1(9Z))	LMGP03010024	PS(16:0/18:1(9Z))	1-hexadecanoyl-2-(9Z-octadecenoyl)-sn-glycero-3-phosphoserine	L-Serine, 3-[(1-oxohexadecyl)oxy]-2-[(1-oxo-9-octadecenyl)oxy]propyl hydrogen phosphate (ester), [R-(Z)]-; 1-Palmitoyl-2-oleoyl-sn-glycero-3-phosphatidylserine; POPS; PS(16:0/18:1); PS(34:1); PS(16:0_18:1)	Glycerophospholipids [GP]	Glycerophosphoserines [GP03]	Diacylglycerophosphoserines [GP0301]	PS 34:1
pos_2151	PE(14:0/20:5(5Z,8Z,11Z,14Z,17Z))	LMGP02011241	PE(14:0/20:5(5Z,8Z,11Z,14Z,17Z))	1-tetradecanoyl-2-(5Z,8Z,11Z,14Z,17Z-eicosapentaenoyl)-glycero-3-phosphoethanolamine	PE(34:5); PE(14:0_20:5)	Glycerophospholipids [GP]	Glycerophosphoethanolamines [GP02]	Diacylglycerophosphoethanolamines [GP0201]	PE 34:5
pos_2155	3b,16a-Dihydroxyandrostenone sulfate	LMST05020022	3b,16a-Dihydroxyandrostenone sulfate	3b,16a-Dihydroxy-5-androsten-17-one 3-sulfate	-	Sterol Lipids [ST]	Steroid conjugates [ST05]	Sulfates [ST0502]	ST 19:2;O3;S
pos_2159	PE(P-16:0/15:0)	LMGP02030011	PE(P-16:0/15:0)	1-(1Z-hexadecenyl)-2-pentadecanoyl-glycero-3-phosphoethanolamine	PE(P-31:0); PE(P-16:0/15:0)	Glycerophospholipids [GP]	Glycerophosphoethanolamines [GP02]	1-(1Z-alkenyl),2-acylglycerophosphoethanolamines [GP0203]	PE O-31:1
pos_2166	Prostaglandin A2	LMFA03010035	PGA2	9-oxo-15S-hydroxy-5Z,10Z,13E-prostatrienoic acid	Prostaglandin A2	Fatty Acyls [FA]	Eicosanoids [FA03]	Prostaglandins [FA0301]	FA 20:5;O2
pos_2175	CDP-DG(16:0/18:1(11Z))	LMGP13010002	CDP-DG(16:0/18:1(11Z))	1-hexadecanoyl-2-(11Z-octadecenoyl)-sn-glycero-3-cytidine-5'-diphosphate	CDP-DG(16:0/18:1); CDP-DG(34:1); CDP-DG(16:0_18:1)	Glycerophospholipids [GP]	CDP-Glycerols [GP13]	CDP-diacylglycerols [GP1301]	CDP-DG 34:1
pos_2180	11-Hydroxyprogesterone 11-glucuronide	LMST05010031	11-Hydroxyprogesterone 11-glucuronide	-	-	Sterol Lipids [ST]	Steroid conjugates [ST05]	Glucuronides [ST0501]	ST 21:3;O3;GlcA
pos_219	3,7,11,15-tetramethyl-2E,6E,10E,14-hexadecatetraenal	LMFA06000197	3,7,11,15-tetramethyl-2E,6E,10E,14-hexadecatetraenal	3,7,11,15-tetramethyl-2E,6E,10E,14-hexadecatetraenal	-	Fatty Acyls [FA]	Fatty aldehydes [FA06]	-	FAL 20:4
pos_2194	Myricetin	LMPK12110001	Myricetin	-	-	Polyketides [PK]	Flavonoids [PK12]	Flavones and Flavonols [PK1211]	-
pos_2195	PG(18:0/18:0)	LMGP04010038	PG(18:0/18:0)	1,2-dioctadecanoyl-sn-glycero-3-phospho-(1'-sn-glycerol)	Distearoyl phosphatidylglycerol; PG(36:0); PG(18:0/18:0)	Glycerophospholipids [GP]	Glycerophosphoglycerols [GP04]	Diacylglycerophosphoglycerols [GP0401]	PG 36:0
pos_22	6-pentadecyl Salicylic Acid	LMPK15040002	6-pentadecyl salicylic acid	2-hydroxy-6-pentadecylbenzoic acid	6-PDSA	Polyketides [PK]	Phenolic lipids [PK15]	Anacardic acids and derivatives [PK1504]	-
pos_2239	CDP-DG(16:0/22:6(4Z,7Z,10Z,13Z,16Z,19Z))	LMGP13010011	CDP-DG(16:0/22:6(4Z,7Z,10Z,13Z,16Z,19Z))	[({[(2R,3R,5R)-5-(4-amino-2-oxo-1,2-dihydropyrimidin-1-yl)-3,4-dihydroxyoxolan-2-yl]methoxy}(hydroxy)phosphoryl)oxy][(2R)-2-[(4Z,7Z,10Z,13Z,16Z,19Z)-docosa-4,7,10,13,16,19-hexaenoyloxy]-3-(hexadecanoyloxy)propoxy]phosphinic acid	CDP-DG(38:6); CDP-DG(16:0_22:6)	Glycerophospholipids [GP]	CDP-Glycerols [GP13]	CDP-diacylglycerols [GP1301]	CDP-DG 38:6
pos_225	Grenoblone	LMPK12120597	Grenoblone	-	-	Polyketides [PK]	Flavonoids [PK12]	Chalcones and dihydrochalcones [PK1212]	-
pos_2281	Meloside L	LMPK12110497	Isoorientin 2''-O-glucopyranoside	-	Meloside L	Polyketides [PK]	Flavonoids [PK12]	Flavones and Flavonols [PK1211]	-
pos_2298	11beta,20-Dihydroxy-3-oxopregn-4-en-21-oic acid	LMST02030223	11beta,20-Dihydroxy-3-oxopregn-4-en-21-oic acid	11beta,20-Dihydroxy-3-oxopregn-4-en-21-oic acid	-	Sterol Lipids [ST]	Steroids [ST02]	C21 steroids (gluco/mineralocorticoids, progestogins) and derivatives [ST0203]	ST 21:3;O5
pos_2301	Delphinidin 3-sambubioside	LMPK12010279	-	Delphinidin 3-sambubioside	-	Polyketides [PK]	Flavonoids [PK12]	Anthocyanidins [PK1201]	-
pos_2305	PE(20:0/22:6(4Z,7Z,10Z,13Z,16Z,19Z))	LMGP02011176	PE(20:0/22:6(4Z,7Z,10Z,13Z,16Z,19Z))	1-eicosanoyl-2-(4Z,7Z,10Z,13Z,16Z,19Z-docosahexaenoyl)-glycero-3-phosphoethanolamine	PE(42:6); PE(20:0_22:6)	Glycerophospholipids [GP]	Glycerophosphoethanolamines [GP02]	Diacylglycerophosphoethanolamines [GP0201]	PE 42:6
pos_2308	Bassic acid	LMPR0106150025	Bassic acid	(4R)-2beta,3beta,23-trihydroxy-oleana-5,12-dien-28-oic acid	-	Prenol Lipids [PR]	Isoprenoids [PR01]	C30 isoprenoids (triterpenes) [PR0106]	-
pos_232	8-Hydroxygalangin	LMPK12113088	8-Hydroxygalangin	-	-	Polyketides [PK]	Flavonoids [PK12]	Flavones and Flavonols [PK1211]	-
pos_2321	Rebaudioside A	LMPR01040126	Rebaudioside A	-	Truvia	Prenol Lipids [PR]	Isoprenoids [PR01]	C20 isoprenoids (diterpenes) [PR0104]	-
pos_2326	19(20)-EpDPE	LMFA04000038	19(20)-EpDPE	(+/-)-19(20)-epoxy-4Z,7Z,10Z,13Z,16Z-docosapentaenoic acid	-	Fatty Acyls [FA]	Docosanoids [FA04]	Other Docosanoids [FA0400]	FA 22:6;O
pos_2337	20-dihydroxyleukotriene B4	LMFA03020061	20-dihydroxyleukotriene B4	(5R,6Z,8E,10E,12S,14Z)-5,12,20,20-tetrahydroxyicosa-6,8,10,14-tetraenoic acid	-	Fatty Acyls [FA]	Eicosanoids [FA03]	Leukotrienes [FA0302]	FA 20:4;O4
pos_2341	PE(15:0/16:1(9Z))	LMGP02011235	PE(15:0/16:1(9Z))	1-pentadecanoyl-2-(9Z-hexadecenoyl)-glycero-3-phosphoethanolamine	PE(31:1); PE(15:0_16:1)	Glycerophospholipids [GP]	Glycerophosphoethanolamines [GP02]	Diacylglycerophosphoethanolamines [GP0201]	PE 31:1
pos_2353	Quinestrol	LMST02010037	Quinestrol	3-o-cyclopentyl-17alpha-ethinyl-estra-1,3,5(10)-triene-3,17beta-diol	-	Sterol Lipids [ST]	Steroids [ST02]	C18 steroids (estrogens) and derivatives [ST0201]	ST 25:6;O2
pos_2361	4'-Hydroxy-5,7-dimethoxyflavan	LMPK12020276	-	4'-Hydroxy-5,7-dimethoxyflavan	-	Polyketides [PK]	Flavonoids [PK12]	Flavans, Flavanols and Leucoanthocyanidins [PK1202]	-
pos_2365	3-Hydroxynonyl acetate	LMFA07010753	3-Hydroxynonyl acetate	3-hydroxynonyl acetate	-	Fatty Acyls [FA]	Fatty esters [FA07]	Wax monoesters [FA0701]	WE 11:0;O
pos_2372	Pelargonic acid	LMFA01010009	Pelargonic acid	nonanoic acid	Nonylic acid; C9:0; Nonoic acid	Fatty Acyls [FA]	Fatty Acids and Conjugates [FA01]	Straight chain fatty acids [FA0101]	FA 9:0
pos_2385	Artobiloxanthone	LMPK12110939	Artobiloxanthone	-	-	Polyketides [PK]	Flavonoids [PK12]	Flavones and Flavonols [PK1211]	-
pos_2392	4Alpha-hydroxymethyl-5alpha-cholesta-8-en-3beta-ol	LMST01010235	-	4alpha-hydroxymethyl-5alpha-cholesta-8-en-3beta-ol	-	Sterol Lipids [ST]	Sterols [ST01]	Cholesterol and derivatives [ST0101]	ST 28:1;O2
pos_240	11,11-Difluoro-9Z-dodecenyl acetate	LMFA07010259	11,11-Difluoro-9Z-dodecenyl acetate	11,11-Difluoro-9Z-dodecenyl acetate	-	Fatty Acyls [FA]	Fatty esters [FA07]	Wax monoesters [FA0701]	-
pos_2466	Delta-Tocopherol	LMPR02020066	delta-tocopherol	(2R)-2,8-dimethyl-2-[(4R,8R)-4,8,12-trimethyltridecyl]-3,4-dihydro-2H-chromen-6-ol	-	Prenol Lipids [PR]	Quinones and hydroquinones [PR02]	Vitamin E [PR0202]	-
pos_2479	Hydroxypropionylcarnitine	LMFA07070074	Hydroxypropionylcarnitine	(3S)-3-[(3-hydroxypropanoyl)oxy]-4-(trimethylazaniumyl)butanoate	-	Fatty Acyls [FA]	Fatty esters [FA07]	Fatty acyl carnitines [FA0707]	CAR 3:0;O
pos_248	beta-Hydroxy-2',6'-dimethoxy-3',4'-methylenedioxydihydrochalcone	LMPK12120589	-	beta-Hydroxy-2',6'-dimethoxy-3',4'-methylenedioxydihydrochalcone	-	Polyketides [PK]	Flavonoids [PK12]	Chalcones and dihydrochalcones [PK1212]	-
pos_2481	5alpha-Androst-16-en-3-one	LMST02020079	5alpha-androst-16-en-3-one	5alpha-androst-16-en-3-one	androstenone	Sterol Lipids [ST]	Steroids [ST02]	C19 steroids (androgens) and derivatives [ST0202]	ST 19:2;O
pos_25	9S,10R-Epoxy-6Z-octadecene	LMFA12000284	9S,10R-Epoxy-6Z-octadecene	9S,10R-Epoxy-6Z-octadecene	-	Fatty Acyls [FA]	Oxygenated hydrocarbons [FA12]	-	-
pos_250	DG(18:3(9Z,12Z,15Z)/18:3(9Z,12Z,15Z)/0:0)	LMGL02010079	DG(18:3(9Z,12Z,15Z)/18:3(9Z,12Z,15Z)/0:0)	1,2-di-(9Z,12Z,15Z-octadecatrienoyl)-sn-glycerol	DG(18:3/18:3/0:0)	Glycerolipids [GL]	Diradylglycerols [GL02]	Diacylglycerols [GL0201]	DG 36:6
pos_2521	CDP-DG(18:0/22:3(10Z,13Z,16Z))	LMGP13010019	CDP-DG(18:0/22:3(10Z,13Z,16Z))	[({[(2R,3R,5R)-5-(4-amino-2-oxo-1,2-dihydropyrimidin-1-yl)-3,4-dihydroxyoxolan-2-yl]methoxy}(hydroxy)phosphoryl)oxy][(2R)-2-[(10Z,13Z,16Z)-docosa-10,13,16-trienoyloxy]-3-(octadecanoyloxy)propoxy]phosphinic acid	CDP-DG(40:3); CDP-DG(18:0_22:3)	Glycerophospholipids [GP]	CDP-Glycerols [GP13]	CDP-diacylglycerols [GP1301]	CDP-DG 40:3
pos_2538	SM(d18:1/24:0)	LMSP03010008	SM(d18:1/24:0)	N-(tetracosanoyl)-sphing-4-enine-1-phosphocholine	C24 Sphingomyelin	Sphingolipids [SP]	Phosphosphingolipids [SP03]	Ceramide phosphocholines (sphingomyelins) [SP0301]	SM 42:1;O2
pos_2542	Allylestrenol	LMST02030125	Allylestrenol	19-norpregn-4-ene-20-yn-17beta-ol	-	Sterol Lipids [ST]	Steroids [ST02]	C21 steroids (gluco/mineralocorticoids, progestogins) and derivatives [ST0203]	ST 21:2;O
pos_2559	PE(14:0/14:0)	LMGP02010352	PE(14:0/14:0)	1,2-ditetradecanoyl-sn-glycero-3-phosphoethanolamine	Dimyristoyl phosphatidylethanolamine; PE(28:0); PE(14:0_14:0)	Glycerophospholipids [GP]	Glycerophosphoethanolamines [GP02]	Diacylglycerophosphoethanolamines [GP0201]	PE 28:0
pos_257	Isognaphalin 8-butyrate	LMPK12113102	Isognaphalin 8-butyrate	-	-	Polyketides [PK]	Flavonoids [PK12]	Flavones and Flavonols [PK1211]	-
pos_2573	Methylthiomethyl hexanoate	LMFA07010969	Methylthiomethyl hexanoate	(methylsulfanyl)methyl hexanoate	-	Fatty Acyls [FA]	Fatty esters [FA07]	Wax monoesters [FA0701]	-
pos_2596	Sakuranetin	LMPK12140571	Sakuranetin	-	-	Polyketides [PK]	Flavonoids [PK12]	Flavanones [PK1214]	-
pos_260	PA(18:3(6Z,9Z,12Z)/16:0)	LMGP10010370	PA(18:3(6Z,9Z,12Z)/16:0)	1-(6Z,9Z,12Z-octadecatrienoyl)-2-hexadecanoyl-glycero-3-phosphate	PA(34:3); PA(16:0_18:3)	Glycerophospholipids [GP]	Glycerophosphates [GP10]	Diacylglycerophosphates [GP1001]	PA 34:3
pos_2615	PC(20:5(5Z,8Z,11Z,14Z,17Z)/20:1(11Z))	LMGP01011945	PC(20:5(5Z,8Z,11Z,14Z,17Z)/20:1(11Z))	1-(5Z,8Z,11Z,14Z,17Z-eicosapentaenoyl)-2-(11Z-eicosenoyl)-glycero-3-phosphocholine	PC(40:6); PC(20:1_20:5)	Glycerophospholipids [GP]	Glycerophosphocholines [GP01]	Diacylglycerophosphocholines [GP0101]	PC 40:6
pos_2626	Allyl nonanoate	LMFA07010778	Allyl nonanoate	prop-2-en-1-yl nonanoate	-	Fatty Acyls [FA]	Fatty esters [FA07]	Wax monoesters [FA0701]	WE 12:1
pos_2628	Oleoylcarnitine	LMFA07070096	O-oleoylcarnitine	3-[(9Z)-octadec-9-enoyloxy]-4-(trimethylazaniumyl)butanoate	(9Z)-octadec-9-enoylcarnitine;3-[(9Z)-octadec-9-enoyloxy]-4-(trimethylammonio)butanoate;acylcarnitine C18:1;oleoylcarnitine	Fatty Acyls [FA]	Fatty esters [FA07]	Fatty acyl carnitines [FA0707]	CAR 18:1
pos_2632	PI(18:2(9Z,12Z)/22:2(13Z,16Z))	LMGP06010332	PI(18:2(9Z,12Z)/22:2(13Z,16Z))	1-(9Z,12Z-octadecadienoyl)-2-(13Z,16Z-docosadienoyl)-glycero-3-phospho-(1'-myo-inositol)	PI(40:4); PI(18:2_22:2)	Glycerophospholipids [GP]	Glycerophosphoinositols [GP06]	Diacylglycerophosphoinositols [GP0601]	PI 40:4
pos_2639	PI(16:0/18:0)	LMGP06010878	PI(16:0/18:0)	1-hexadecanoyl-2-octadecanoyl-glycero-3-phospho-(1'-myo-inositol)	PI(34:0); PI(16:0_18:0)	Glycerophospholipids [GP]	Glycerophosphoinositols [GP06]	Diacylglycerophosphoinositols [GP0601]	PI 34:0
pos_2641	PE(16:1(9Z)/22:0)	LMGP02010535	PE(16:1(9Z)/22:0)	1-(9Z-hexadecenoyl)-2-docosanoyl-glycero-3-phosphoethanolamine	PE(38:1); PE(16:1_22:0)	Glycerophospholipids [GP]	Glycerophosphoethanolamines [GP02]	Diacylglycerophosphoethanolamines [GP0201]	PE 38:1
pos_265	4,10-undecadiynal	LMFA06000070	4,10-undecadiynal	4,10-undecadiynal	-	Fatty Acyls [FA]	Fatty aldehydes [FA06]	-	FAL 11:4
pos_2666	5-cis-8-cis-Tetradecadienoyl-CoA	LMFA07050266	5-cis-8-cis-Tetradecadienoyl-CoA	{[5-(6-amino-9H-purin-9-yl)-4-hydroxy-2-({[hydroxy({[hydroxy(3-hydroxy-2,2-dimethyl-3-{[2-({2-[(5Z,8Z)-tetradeca-5,8-dienoylsulfanyl]ethyl}carbamoyl)ethyl]carbamoyl}propoxy)phosphoryl]oxy})phosphoryl]oxy}methyl)oxolan-3-yl]oxy}phosphonic acid	-	Fatty Acyls [FA]	Fatty esters [FA07]	Fatty acyl CoAs [FA0705]	CoA 14:2
pos_2682	Prostaglandin E3	LMFA03010135	PGE3	9-oxo-11R,15S-dihydroxy-5Z,13E,17Z-prostatrienoic acid	Prostaglandin E3	Fatty Acyls [FA]	Eicosanoids [FA03]	Prostaglandins [FA0301]	FA 20:5;O3
pos_2683	PS(18:3(9Z,12Z,15Z)/20:4(5Z,8Z,11Z,14Z))	LMGP03010417	PS(18:3(9Z,12Z,15Z)/20:4(5Z,8Z,11Z,14Z))	1-(9Z,12Z,15Z-octadecatrienoyl)-2-(5Z,8Z,11Z,14Z-eicosatetraenoyl)-glycero-3-phosphoserine	PS(38:7); PS(18:3_20:4)	Glycerophospholipids [GP]	Glycerophosphoserines [GP03]	Diacylglycerophosphoserines [GP0301]	PS 38:7
pos_2687	4-Fumarylacetoacetic acid	LMFA01170066	4-fumarylacetoacetic acid	4,6-dioxo-2E-octenedioic acid	4-Fumarylacetoacetic acid; Fumarylacetoacetone	Fatty Acyls [FA]	Fatty Acids and Conjugates [FA01]	Dicarboxylic acids [FA0117]	FA 8:4;O4
pos_2696	Pentacosanoic acid	LMFA01010025	Hyenic acid	Pentacosanoic acid	C25:0	Fatty Acyls [FA]	Fatty Acids and Conjugates [FA01]	Straight chain fatty acids [FA0101]	FA 25:0
pos_27	Diosmin	LMPK12110814	Luteolin 4'-methyl ether 7-rutinoside	-	3',5,7-Trihydroxy-4'-methoxyflavone 7-rutinoside;; Diosmin	Polyketides [PK]	Flavonoids [PK12]	Flavones and Flavonols [PK1211]	-
pos_270	Lynestrenol	LMST02030127	Lynestrenol	19-norpregn-4-en-20-yn-17alpha-ol	-	Sterol Lipids [ST]	Steroids [ST02]	C21 steroids (gluco/mineralocorticoids, progestogins) and derivatives [ST0203]	ST 20:3;O
pos_271	8,11,14,18-Eicosatetraynoic acid	LMFA01030692	8,11,14,18-Eicosatetraynoic acid	8,11,14,18-Eicosatetraynoic acid	-	Fatty Acyls [FA]	Fatty Acids and Conjugates [FA01]	Unsaturated fatty acids [FA0103]	FA 20:6
pos_2726	Sorbic acid	LMFA01030100	Sorbic acid	2E,4E-hexadienoic acid	C6:2n-2,4	Fatty Acyls [FA]	Fatty Acids and Conjugates [FA01]	Unsaturated fatty acids [FA0103]	FA 6:2
pos_2729	Myrcene	LMPR0102010005	Myrcene	-	-	Prenol Lipids [PR]	Isoprenoids [PR01]	C10 isoprenoids (monoterpenes) [PR0102]	-
pos_273	N-arachidonoyl glutamine	LMFA08020126	N-arachidonoyl glutamine	N-(5Z,8Z,11Z,14Z-eicosatetraenoyl)-glutamine	-	Fatty Acyls [FA]	Fatty amides [FA08]	N-acyl amines [FA0802]	-
pos_2732	Ethyl butanoate	LMFA07010874	Ethyl butyrate	ethyl butanoate	-	Fatty Acyls [FA]	Fatty esters [FA07]	Wax monoesters [FA0701]	WE 6:0
pos_2735	7,8-Didehydrodesmosterol	LMST01010121	7-dehydro-desmosterol	cholest-5,7,24-trien-3beta-ol	24-Dehydroprovitamin D3; 7,8-Didehydrodesmosterol	Sterol Lipids [ST]	Sterols [ST01]	Cholesterol and derivatives [ST0101]	ST 27:3;O
pos_2741	3-mercaptohexyl acetate	LMFA05000540	3-mercaptohexyl acetate	3-thiohexyl acetate	-	Fatty Acyls [FA]	Fatty alcohols [FA05]	-	-
pos_2743	PG(16:0/16:1(9Z))	LMGP04010910	PG(16:0/16:1(9Z))	1-hexadecanoyl-2-(9Z-hexadecenoyl)-glycero-3-phospho-(1'-sn-glycerol)	PG(32:1); PG(16:0_16:1)	Glycerophospholipids [GP]	Glycerophosphoglycerols [GP04]	Diacylglycerophosphoglycerols [GP0401]	PG 32:1
pos_2744	L-Palmitoylcarnitine	LMFA07070079	L-palmitoylcarnitine	(3S)-3-hexadecanoyloxy-4-(trimethylammonio)butanoate	(3S)-3-palmitoyloxy-4-(trimethylammonio)butanoate;(S)-palmitoylcarnitine	Fatty Acyls [FA]	Fatty esters [FA07]	Fatty acyl carnitines [FA0707]	CAR 16:0
pos_2752	PA(16:1(9Z)/16:1(9Z))	LMGP10010969	PA(16:1(9Z)/16:1(9Z))	1,2-di-(9Z-hexadecenoyl)-sn-glycero-3-phosphate	PA(32:2); PA(16:1_16:1)	Glycerophospholipids [GP]	Glycerophosphates [GP10]	Diacylglycerophosphates [GP1001]	PA 32:2
pos_2755	PC(14:0/16:1(9Z))	LMGP01010485	PC(14:0/16:1(9Z))	1-tetradecanoyl-2-(9Z-hexadecenoyl)-sn-glycero-3-phosphocholine	PC(14:0/16:1); PC(30:1); PC(14:0_16:1)	Glycerophospholipids [GP]	Glycerophosphocholines [GP01]	Diacylglycerophosphocholines [GP0101]	PC 30:1
pos_2759	L-Acetylcarnitine	LMFA07070050	Acetyl-L-carnitine	(3R)-3-acetyloxy-4-(trimethylazaniumyl)butanoate	L-Acetylcarnitine	Fatty Acyls [FA]	Fatty esters [FA07]	Fatty acyl carnitines [FA0707]	CAR 2:0
pos_2760	Myristoleic acid	LMFA01030051	Myristoleic acid	9Z-tetradecenoic acid	cis-9-tetradecenoic acid; C14:1n-5	Fatty Acyls [FA]	Fatty Acids and Conjugates [FA01]	Unsaturated fatty acids [FA0103]	FA 14:1
pos_2761	3beta-hydroxy-4beta-methyl-5alpha-cholest-7-ene-4alpha-carboxylic acid	LMST01010175	3beta-hydroxy-4beta-methyl-5alpha-cholest-7-ene-4alpha-carboxylic acid	3beta-hydroxy-4beta-methyl-5alpha-cholest-7-ene-4alpha-carboxylic acid	3beta-Hydroxy-4beta-methyl-5alpha-cholest-7-ene-4alpha-carboxylate; 3beta-hydroxy-4beta-methyl-5alpha-cholest-7-ene-4alpha-carboxylic acid	Sterol Lipids [ST]	Sterols [ST01]	Cholesterol and derivatives [ST0101]	ST 29:2;O3
pos_2769	PC(16:1(9Z)/0:0)	LMGP01050022	PC(16:1(9Z)/0:0)	1-(9Z-hexadecenoyl)-sn-glycero-3-phosphocholine	1-palmitoleoyl-glycerophosphocholine; LPC(16:1); LPC(16:1)	Glycerophospholipids [GP]	Glycerophosphocholines [GP01]	Monoacylglycerophosphocholines [GP0105]	LPC 16:1
pos_2779	CDP-DG(18:1(9Z)/22:3(10Z,13Z,16Z))	LMGP13010035	CDP-DG(18:1(9Z)/22:3(10Z,13Z,16Z))	[({[(2R,3R,5R)-5-(4-amino-2-oxo-1,2-dihydropyrimidin-1-yl)-3,4-dihydroxyoxolan-2-yl]methoxy}(hydroxy)phosphoryl)oxy][(2R)-2-[(10Z,13Z,16Z)-docosa-10,13,16-trienoyloxy]-3-[(9Z)-octadec-9-enoyloxy]propoxy]phosphinic acid	CDP-DG(40:4); CDP-DG(18:1_22:3)	Glycerophospholipids [GP]	CDP-Glycerols [GP13]	CDP-diacylglycerols [GP1301]	CDP-DG 40:4
pos_278	Maackiaflavanone	LMPK12140487	Maackiaflavanone	-	-	Polyketides [PK]	Flavonoids [PK12]	Flavanones [PK1214]	-
pos_2782	Delta(6)-trans,Delta(8)-cis-leukotriene B4	LMFA03020072	Delta(6)-trans,Delta(8)-cis-leukotriene B4	(5S,6E,8Z,10E,12R,14Z)-5,12-dihydroxyicosa-6,8,10,14-tetraenoic acid	(5S,12R,6E,8Z,10E,14Z)-5,12-dihydroxy-6,8,10,14-eicosatetraenoic acid;(5S,6E,8Z,10E,12R,14Z)-5,12-dihydroxyeicosa-6,8,10,14-tetraenoic acid;(6E,8Z)-LTB4;5(S),12(R)-dihydroxy-6(E),8(Z),10(E),14(Z)-eicosatetraenoic acid;5(S),12(R)-dihydroxy-6(E),8(Z),10(E),14(Z)-icosatetraenoic acid;Delta(6)-trans,Delta(8)-cis-LTB4	Fatty Acyls [FA]	Eicosanoids [FA03]	Leukotrienes [FA0302]	FA 20:4;O2
pos_2787	PS(17:0/14:0)	LMGP03010227	PS(17:0/14:0)	1-heptadecanoyl-2-tetradecanoyl-glycero-3-phosphoserine	PS(31:0); PS(14:0_17:0)	Glycerophospholipids [GP]	Glycerophosphoserines [GP03]	Diacylglycerophosphoserines [GP0301]	PS 31:0
pos_28	Cer(d18:0/13:0)	LMSP02020020	Cer(d18:0/13:0)	N-(tridecanoyl)-sphinganine	Cer[NdS]	Sphingolipids [SP]	Ceramides [SP02]	N-acylsphinganines (dihydroceramides) [SP0202]	Cer 31:0;O2
pos_2801	PS(18:1(9Z)/0:0)	LMGP03050001	PS(18:1(9Z)/0:0)	1-(9Z-octadecenoyl)-sn-glycero-3-phosphoserine	L-Serine, 2-hydroxy-3-[(1-oxo-9-octadecenyl)oxy]propyl hydrogen phosphate (ester), [R-(Z)]-; PS(18:1/0:0); LPS(18:1)	Glycerophospholipids [GP]	Glycerophosphoserines [GP03]	Monoacylglycerophosphoserines [GP0305]	LPS 18:1
pos_2809	PS(17:0/16:1(9Z))	LMGP03010230	PS(17:0/16:1(9Z))	1-heptadecanoyl-2-(9Z-hexadecenoyl)-glycero-3-phosphoserine	PS(33:1); PS(16:1_17:0)	Glycerophospholipids [GP]	Glycerophosphoserines [GP03]	Diacylglycerophosphoserines [GP0301]	PS 33:1
pos_281	6-methyl-heptanoic acid	LMFA01020242	Isocaprylic acid	6-methyl-heptanoic acid	-	Fatty Acyls [FA]	Fatty Acids and Conjugates [FA01]	Branched fatty acids [FA0102]	FA 8:0
pos_2811	Cyclosporin A	LMPK14000003	Cyclosporin A	-	-	Polyketides [PK]	Non-ribosomal peptide/polyketide hybrids [PK14]	-	-
pos_2812	Stearidonic Acid	LMFA01030357	Stearidonic acid	6Z,9Z,12Z,15Z-octadecatetraenoic acid	Moroctic acid; C18:4n-3,6,9,12; Morotic acid	Fatty Acyls [FA]	Fatty Acids and Conjugates [FA01]	Unsaturated fatty acids [FA0103]	FA 18:4
pos_2818	C16 Sphingosine	LMSP01040008	C16 Sphingosine	Hexadecasphing-4E-enine	Hexadecasphingosine	Sphingolipids [SP]	Sphingoid bases [SP01]	Sphingoid base homologs and variants [SP0104]	SPB 16:1;O2
pos_2822	dodecanamide	LMFA08010001	dodecanamide	dodecanamide	-	Fatty Acyls [FA]	Fatty amides [FA08]	Primary amides [FA0801]	-
pos_2823	5-propylideneisolongifolane	LMPR0103500002	5-propylideneisolongifolane	(1S,5E,8S)-2,2,7,7-tetramethyl-5-propylidenetricyclo[6.2.1.0(1,6)]undecane	5-propylidene-2,2,7,7-tetramethyltricyclo[6.2.1.0(1,6)]undecane	Prenol Lipids [PR]	Isoprenoids [PR01]	C15 isoprenoids (sesquiterpenes) [PR0103]	-
pos_2826	4-Nonylphenol	LMPK15010001	Nonylphenol	4-nonylphenol	-	Polyketides [PK]	Phenolic lipids [PK15]	Alkyl phenols and derivatives [PK1501]	-
pos_283	Acutifolane A	LMPR0103520002	Acutifolane A	-	-	Prenol Lipids [PR]	Isoprenoids [PR01]	C15 isoprenoids (sesquiterpenes) [PR0103]	-
pos_2830	Zearalenone	LMPK04000016	Zearalenone	-	-	Polyketides [PK]	Macrolides and lactone polyketides [PK04]	-	-
pos_2832	Ginsenoside Rg3	LMPR0106080010	Ginsenoside Rg3	12beta,20S-dihydroxydammar-24-en-3beta-yl 2-O-betaD-glucopyranosyl-beta-D-glucopyranoside	-	Prenol Lipids [PR]	Isoprenoids [PR01]	C30 isoprenoids (triterpenes) [PR0106]	-
pos_2842	13,14-dihydro-15-keto-PGF2alpha	LMFA03010027	13,14-dihydro-15-keto-PGF2alpha	9S,11S-dihydroxy-15-oxo-5Z-prostenoic acid	13,14-dihydro-15-keto-Prostaglandin F2alpha	Fatty Acyls [FA]	Eicosanoids [FA03]	Prostaglandins [FA0301]	FA 20:3;O3
pos_2851	Myriocin	LMSP01080020	Myriocin	-	-	Sphingolipids [SP]	Sphingoid bases [SP01]	Sphingoid base analogs [SP0108]	-
pos_2853	alpha-Tocotrienol	LMPR02020054	alpha-tocotrienol	2R,5,7,8-tetramethyl-2-[(3E,7E)-4,8,12-trimethyltrideca-3,7,11-trien-1-yl]-3,4-dihydro-2H-chromen-6-ol	alpha-tocotrienol; zeta1-tocopherol	Prenol Lipids [PR]	Quinones and hydroquinones [PR02]	Vitamin E [PR0202]	-
pos_288	3,4-Dimethyl-5-pentyl-2-furanheptanoic acid	LMFA01150027	7-(3,4-dimethyl-5-pentylfuran-2-yl)-heptanoic acid	7-(5-pentyl-3,4-dimethylfuran-2-yl)-heptanoic acid	7D5; 3,4-dimethyl-5-pentyl-2-furanheptanoic acid	Fatty Acyls [FA]	Fatty Acids and Conjugates [FA01]	Heterocyclic fatty acids [FA0115]	FA 18:3;O
pos_29	pentanamide	LMFA08010002	pentanamide	pentanamide	-	Fatty Acyls [FA]	Fatty amides [FA08]	Primary amides [FA0801]	-
pos_297	2',4',6',3,4-Pentahydroxy-3'-geranyl-5-prenyldihydrochalcone	LMPK12120532	-	2',4',6',3,4-Pentahydroxy-3'-geranyl-5-prenyldihydrochalcone	-	Polyketides [PK]	Flavonoids [PK12]	Chalcones and dihydrochalcones [PK1212]	-
pos_3	Cholic acid	LMST04010001	Cholic acid	3Alpha,7Alpha,12Alpha-trihydroxy-5Beta-cholan-24-oic acid	Cholic Acid	Sterol Lipids [ST]	Bile acids and derivatives [ST04]	C24 bile acids, alcohols, and derivatives [ST0401]	ST 24:1;O5
pos_301	Cycloviolaxanthin	LMPR01070063	Cycloviolaxanthin	-	-	Prenol Lipids [PR]	Isoprenoids [PR01]	C40 isoprenoids (tetraterpenes) [PR0107]	-
pos_315	Methylsainfuran	LMPK12160044	Methylsainfuran	2-(2',4'-Dimethoxyphenyl)-5-hydroxy-6-methoxybenzofuran	-	Polyketides [PK]	Flavonoids [PK12]	Other Flavonoids [PK1216]	-
pos_33	7-Hydroxy-2-methylisoflavone	LMPK12050001	-	7-Hydroxy-2-methylisoflavone	-	Polyketides [PK]	Flavonoids [PK12]	Isoflavonoids [PK1205]	-
pos_331	PE(22:2(13Z,16Z)/18:4(6Z,9Z,12Z,15Z))	LMGP02011087	PE(22:2(13Z,16Z)/18:4(6Z,9Z,12Z,15Z))	1-(13Z,16Z-docosadienoyl)-2-(6Z,9Z,12Z,15Z-octadecatetraenoyl)-glycero-3-phosphoethanolamine	PE(40:6); PE(18:4_22:2)	Glycerophospholipids [GP]	Glycerophosphoethanolamines [GP02]	Diacylglycerophosphoethanolamines [GP0201]	PE 40:6
pos_335	2'-Methoxy-4'-hydroxydihydrochalcone	LMPK12120444	-	2'-Methoxy-4'-hydroxydihydrochalcone	-	Polyketides [PK]	Flavonoids [PK12]	Chalcones and dihydrochalcones [PK1212]	-
pos_338	PG(P-16:0/20:1(11Z))	LMGP04030019	PG(P-16:0/20:1(11Z))	1-(1Z-hexadecenyl)-2-(11Z-eicosenoyl)-glycero-3-phospho-(1'-sn-glycerol)	PG(P-36:1); PG(P-16:0/20:1)	Glycerophospholipids [GP]	Glycerophosphoglycerols [GP04]	1-(1Z-alkenyl),2-acylglycerophosphoglycerols [GP0403]	PG O-36:2
pos_34	p-Cymene	LMPR0102090014	p-Cymene	-	-	Prenol Lipids [PR]	Isoprenoids [PR01]	C10 isoprenoids (monoterpenes) [PR0102]	-
pos_348	8-C-alpha-L-Arabinosylluteolin	LMPK12110472	8-C-alpha-L-Arabinosylluteolin	-	-	Polyketides [PK]	Flavonoids [PK12]	Flavones and Flavonols [PK1211]	-
pos_350	(23R)-23,25-dihydroxyvitamin D3 / (23R)-23,25-dihydroxycholecalciferol	LMST03020271	(23R)-23,25-dihydroxyvitamin D3 / (23R)-23,25-dihydroxycholecalciferol	(5Z,7E)-(3S,23R)-9,10-seco-5,7,10(19)-cholestatriene-3,23,25-triol	-	Sterol Lipids [ST]	Secosteroids [ST03]	Vitamin D3 and derivatives [ST0302]	-
pos_359	beta-Sitostenone	LMST01040249	beta-Sitostenone	(2R,15R)-14-[(2R,5R)-5-ethyl-6-methylheptan-2-yl]-2,15-dimethyltetracyclo[8.7.0.0^{2,7}.0^{11,15}]heptadec-6-en-5-one	-	Sterol Lipids [ST]	Sterols [ST01]	Stigmasterols and C24-ethyl derivatives [ST0104]	ST 29:2;O
pos_360	Gitogenin	LMST01080010	Gitogenin	(25R)-5alpha-spirostan-2alpha,3beta-diol	-	Sterol Lipids [ST]	Sterols [ST01]	Spirostanols and derivatives [ST0108]	ST 27:2;O4
pos_362	CAPSAICIN	LMFA08020085	Capsaicin	8-Methyl-N-vanillyl-6E-nonenamide	-	Fatty Acyls [FA]	Fatty amides [FA08]	N-acyl amines [FA0802]	NA 18:5;O2
pos_366	12-amino-octadecanoic acid	LMFA01100008	12-amino-octadecanoic acid	12-amino-octadecanoic acid	-	Fatty Acyls [FA]	Fatty Acids and Conjugates [FA01]	Amino fatty acids [FA0110]	-
pos_373	Palmitoyl Serotonin	LMFA08020302	Palmitoyl Serotonin	N-[2-(5-hydroxy-1H-indol-3-yl)ethyl]-hexadecanamide	PA-5HT; Palmitoyl 5HT	Fatty Acyls [FA]	Fatty amides [FA08]	N-acyl amines [FA0802]	-
pos_376	Okanin 4'-O-(4'',6''-di-O-acetylglucoside)	LMPK12120175	Okanin 4'-O-(4'',6''-di-O-acetylglucoside)	3,4,2',3',4'-Pentahydroxychalcone 4'-O-(4'',6''-di-O-acetylglucoside)	-	Polyketides [PK]	Flavonoids [PK12]	Chalcones and dihydrochalcones [PK1212]	-
pos_381	Methyl-liquiritigenin	LMPK12140062	Methyl-liquiritigenin	-	-	Polyketides [PK]	Flavonoids [PK12]	Flavanones [PK1214]	-
pos_382	Cycloartomunoxanthone	LMPK12111517	Cycloartomunoxanthone	-	-	Polyketides [PK]	Flavonoids [PK12]	Flavones and Flavonols [PK1211]	-
pos_389	2',5'-Dihydroxyflavone	LMPK12110084	-	2',5'-Dihydroxyflavone	-	Polyketides [PK]	Flavonoids [PK12]	Flavones and Flavonols [PK1211]	-
pos_392	Ethyl 10-undecenoate	LMFA07010850	Ethyl 10-undecenoate	ethyl undec-10-enoate	-	Fatty Acyls [FA]	Fatty esters [FA07]	Wax monoesters [FA0701]	WE 13:1
pos_396	5-Cholestene-3beta,7alpha,12alpha,24,25-pentol	LMST04030082	-	5-Cholestene-3beta,7alpha,12alpha,24,25-pentol	-	Sterol Lipids [ST]	Bile acids and derivatives [ST04]	C27 bile acids, alcohols, and derivatives [ST0403]	ST 27:1;O5
pos_412	1,9Z,16-heptadecatrien-4,6-diyn-3,8-diol	LMFA05000029	1,9Z,16-heptadecatrien-4,6-diyn-3,8-diol	1,9Z,16-heptadecatrien-4,6-diyn-3,8-diol	heptadeca-1,9Z,16-trien-4,6-diyn-3,8-diol	Fatty Acyls [FA]	Fatty alcohols [FA05]	-	FOH 17:7;O
pos_416	Bufalin	LMST01130001	Bufalin	3beta,14beta-dihydroxy-5beta-bufa-20,22-dienolide	-	Sterol Lipids [ST]	Sterols [ST01]	Bufanolides and derivatives [ST0113]	ST 24:4;O4
pos_423	PE(18:4(6Z,9Z,12Z,15Z)/22:6(4Z,7Z,10Z,13Z,16Z,19Z))	LMGP02010768	PE(18:4(6Z,9Z,12Z,15Z)/22:6(4Z,7Z,10Z,13Z,16Z,19Z))	1-(6Z,9Z,12Z,15Z-octadecatetraenoyl)-2-(4Z,7Z,10Z,13Z,16Z,19Z-docosahexaenoyl)-glycero-3-phosphoethanolamine	PE(40:10); PE(18:4_22:6)	Glycerophospholipids [GP]	Glycerophosphoethanolamines [GP02]	Diacylglycerophosphoethanolamines [GP0201]	PE 40:10
pos_427	Infectocaryone	LMPK12120418	Infectocaryone	-	-	Polyketides [PK]	Flavonoids [PK12]	Chalcones and dihydrochalcones [PK1212]	-
pos_436	(9R,13R)-1a,1b-dinor-10,11-dihydro-12-oxo-15-phytoenoic acid	LMFA02010008	(9R,13R)-1a,1b-dinor-10,11-dihydro-12-oxo-15-phytoenoic acid	(1R,2R)-3-oxo-2-(2'Z-pentenyl)cyclopentanehexanoic acid	-	Fatty Acyls [FA]	Octadecanoids [FA02]	12-oxophytodienoic acid metabolites [FA0201]	FA 16:3;O
pos_438	nandrolone	LMST02010044	nandrolone	17beta-hydroxyestr-4-en-3-one	(17beta)-17-hydroxyestr-4-en-3-one; 17beta-hydroxy-19-nor-4-androsten-3-one; 17beta-hydroxy-4-estren-3-one; 19-Norandrostenolone; 19-Nortestosterone; 4-estren-17beta-ol-3-one; Nandrolone	Sterol Lipids [ST]	Steroids [ST02]	C18 steroids (estrogens) and derivatives [ST0201]	ST 18:2;O2
pos_44	3-oxoglycyrrhetinic acid	LMPR0106150012	3-oxoglycyrrhetinic acid	3,11-dioxoolean-12-en-30-oic acid	3-Oxoglycyrrhetinate; 3-oxoglycyrrhetinic acid	Prenol Lipids [PR]	Isoprenoids [PR01]	C30 isoprenoids (triterpenes) [PR0106]	-
pos_441	PA(20:1(11Z)/17:0)	LMGP10010534	PA(20:1(11Z)/17:0)	1-(11Z-eicosenoyl)-2-heptadecanoyl-glycero-3-phosphate	PA(37:1); PA(17:0_20:1)	Glycerophospholipids [GP]	Glycerophosphates [GP10]	Diacylglycerophosphates [GP1001]	PA 37:1
pos_450	9-hydroxy-hexadecan-1,16-dioic acid	LMFA01170057	9-hydroxy-hexadecan-1,16-dioic acid	9-hydroxy-hexadecan-1,16-dioic acid	-	Fatty Acyls [FA]	Fatty Acids and Conjugates [FA01]	Dicarboxylic acids [FA0117]	FA 16:1;O3
pos_454	5,8,11-Eicosatriynoic Acid	LMFA01030696	5,8,11-Eicosatriynoic acid	5,8,11-Eicosatriynoic acid	-	Fatty Acyls [FA]	Fatty Acids and Conjugates [FA01]	Unsaturated fatty acids [FA0103]	FA 20:6
pos_459	Isopropyl tiglate	LMFA07010924	Isopropyl tiglate	propan-2-yl (2Z)-2-methylbut-2-enoate	-	Fatty Acyls [FA]	Fatty esters [FA07]	Wax monoesters [FA0701]	WE 8:1
pos_46	6-Ethyl-4-methyl-3E,5E,7E-decatriene	LMFA11000053	6-Ethyl-4-methyl-3E,5E,7E-decatriene	6-Ethyl-4-methyl-3E,5E,7E-decatriene	-	Fatty Acyls [FA]	Hydrocarbons [FA11]	-	-
pos_463	Jasmonic acid	LMFA02020001	Jasmonic acid	(1R,2R)-3-oxo-2-(pent-2Z-enyl)-cyclopentaneacetic acid	(-)-Jasmonic acid; (3R,7R)-Jasmonic acid	Fatty Acyls [FA]	Octadecanoids [FA02]	Jasmonic acids [FA0202]	FA 12:3;O
pos_467	Capsanthin 3,6-epoxide	LMPR01070050	Capsanthin 3,6-epoxide	-	-	Prenol Lipids [PR]	Isoprenoids [PR01]	C40 isoprenoids (tetraterpenes) [PR0107]	-
pos_478	Caprylic acid	LMFA01010008	Caprylic acid	octanoic acid	Octylic acid; C8:0	Fatty Acyls [FA]	Fatty Acids and Conjugates [FA01]	Straight chain fatty acids [FA0101]	FA 8:0
pos_48	(Z)-2-Decene-4,6,8-triyn-1-ol	LMFA05000569	(Z)-2-Decene-4,6,8-triyn-1-ol	(2E)-dec-2-en-4,6,8-triyn-1-ol	-	Fatty Acyls [FA]	Fatty alcohols [FA05]	-	FOH 10:7
pos_486	Biochanin A	LMPK12050229	Biochanin A	5,7-Dihydroxy-4'-methoxyisoflavone	Pratensol	Polyketides [PK]	Flavonoids [PK12]	Isoflavonoids [PK1205]	-
pos_49	5-(1-hydroxypropan-2-yl)isolongifol-5-ene	LMPR0103500003	5-(1-hydroxypropan-2-yl)isolongifol-5-ene	2-[(1R,8S)-2,2,7,7-tetramethyltricyclo[6.2.1.0(1,6)]undec-5-en-5-yl]propan-1-ol	2-(2,2,7,7-tetramethyltricyclo[6.2.1.0(1,6)]undec-5-en-5-yl)propan-1-ol	Prenol Lipids [PR]	Isoprenoids [PR01]	C15 isoprenoids (sesquiterpenes) [PR0103]	-
pos_494	Methyl nonanoate	LMFA07010963	Methyl nonanoate	methyl nonanoate	-	Fatty Acyls [FA]	Fatty esters [FA07]	Wax monoesters [FA0701]	WE 10:0
pos_499	Oleic acid	LMFA01030002	Oleic acid	9Z-octadecenoic acid	9-octadecylenic acid; cis-9-octadecenoic acid; cis-Oleic acid; cis-Oleate; Oleate; Elaic acid; Elaidoic acid; C18:1n-9; Rapinic acid	Fatty Acyls [FA]	Fatty Acids and Conjugates [FA01]	Unsaturated fatty acids [FA0103]	FA 18:1
pos_50	8(S)-HETrE	LMFA03050029	8(S)-HETrE	8-hydroxyeicosa-9,11,14-trienoic acid	-	Fatty Acyls [FA]	Eicosanoids [FA03]	Hydroxy/hydroperoxyeicosatrienoic acids [FA0305]	FA 20:3;O
pos_507	Androstanedione	LMST02020085	-	5alpha-androstane-3,17-dione	5alpha-Androstane-3,17-dione; 5alpha-androstane-3,17-dione; Androstanedione	Sterol Lipids [ST]	Steroids [ST02]	C19 steroids (androgens) and derivatives [ST0202]	ST 19:2;O2
pos_513	N-Oleoyl GABA	LMFA08020104	N-oleoyl GABA	N-(9Z-octadecenoyl)-gamma-aminobutyric acid	-	Fatty Acyls [FA]	Fatty amides [FA08]	N-acyl amines [FA0802]	NA 22:2;O2
pos_517	18-Oxocortisol	LMST02030194	18-Oxocortisol	-	-	Sterol Lipids [ST]	Steroids [ST02]	C21 steroids (gluco/mineralocorticoids, progestogins) and derivatives [ST0203]	ST 21:4;O6
pos_527	Gingerglycolipid C	LMGL04010018	Gingerglycolipid C	1-(9Z-octadecenoy)l-3-O-(6'-O-alpha-D-galactosyl-beta-D-galactosyl)-sn-glycerol	-	Glycerolipids [GL]	Glycosylmonoradylglycerols [GL04]	Glycosylmonoacylglycerols [GL0401]	DGMG 18:1
pos_541	Tridecanal	LMFA06000074	tridecanal	tridecanal	-	Fatty Acyls [FA]	Fatty aldehydes [FA06]	-	FAL 13:0
pos_549	PG(18:0/22:6(4Z,7Z,10Z,13Z,16Z,19Z))	LMGP04010040	PG(18:0/22:6(4Z,7Z,10Z,13Z,16Z,19Z))	1-octadecanoyl-2-(4Z,7Z,10Z,13Z,16Z,19Z-docosahexaenoyl)-sn-glycero-3-phospho-(1'-sn-glycerol)	PG(18:0/22:6); PG(40:6); PG(18:0_22:6)	Glycerophospholipids [GP]	Glycerophosphoglycerols [GP04]	Diacylglycerophosphoglycerols [GP0401]	PG 40:6
pos_55	iso-Debromo-laurinterol	LMPR0103150001	iso-Debromo-laurinterol	-	-	Prenol Lipids [PR]	Isoprenoids [PR01]	C15 isoprenoids (sesquiterpenes) [PR0103]	-
pos_554	Hypogeic acid	LMFA01030808	Hypogeic acid	7E-hexadecenoic acid	C16:1n-9	Fatty Acyls [FA]	Fatty Acids and Conjugates [FA01]	Unsaturated fatty acids [FA0103]	FA 16:1
pos_56	Diosmetin	LMPK12110824	Diosmetin	5,7,3'-Trihydroxy-4'-methoxyflavone	4'-Methylluteolin	Polyketides [PK]	Flavonoids [PK12]	Flavones and Flavonols [PK1211]	-
pos_560	Dodecanedioic acid	LMFA01170009	Dodecanedioic acid	Dodecanedioic acid	-	Fatty Acyls [FA]	Fatty Acids and Conjugates [FA01]	Dicarboxylic acids [FA0117]	FA 12:1;O2
pos_562	11beta-Hydroxy-3,20-dioxopregn-4-en-21-oic acid	LMST02030225	HDOPA	11beta-Hydroxy-3,20-dioxopregn-4-en-21-oic acid	-	Sterol Lipids [ST]	Steroids [ST02]	C21 steroids (gluco/mineralocorticoids, progestogins) and derivatives [ST0203]	ST 21:4;O5
pos_563	Propenoylcarnitine	LMFA07070104	Propenoylcarnitine	(3S)-3-(prop-2-enoyloxy)-4-(trimethylazaniumyl)butanoate	-	Fatty Acyls [FA]	Fatty esters [FA07]	Fatty acyl carnitines [FA0707]	CAR 3:1
pos_567	Kaempferol 3-neohesperidoside-7-(2''-p-coumaryllaminaribioside)	LMPK12111827	Kaempferol 3-neohesperidoside-7-(2''-p-coumaryllaminaribioside)	-	-	Polyketides [PK]	Flavonoids [PK12]	Flavones and Flavonols [PK1211]	-
pos_57	7-dehydrocholesterol	LMST01010069	7-dehydrocholesterol	cholesta-5,7-dien-3beta-ol	7-DHC	Sterol Lipids [ST]	Sterols [ST01]	Cholesterol and derivatives [ST0101]	ST 27:2;O
pos_577	Prostaglandin J2	LMFA03010019	PGJ2	11-oxo-15S-hydroxy-5Z,9,13E-prostatrienoic acid	Prostaglandin J2; 8-epi-15-J2t-IsoP; 11-oxo-15S-hydroxy-5Z,9,13E-prostatrienoic acid-cyclo[8S,12R]	Fatty Acyls [FA]	Eicosanoids [FA03]	Prostaglandins [FA0301]	FA 20:5;O2
pos_581	1-Tridecene	LMFA11000331	1-Tridecene	1-Tridecene	-	Fatty Acyls [FA]	Hydrocarbons [FA11]	-	-
pos_594	19-Norandrosterone	LMST02010042	19-norandrosterone	3alpha-hydroxy-5alpha-estran-17-one	19-Noreoiandrosterone; 19-Noretiocholanolone	Sterol Lipids [ST]	Steroids [ST02]	C18 steroids (estrogens) and derivatives [ST0201]	ST 18:1;O2
pos_604	Isobutyryl-L-carnitine	LMFA07070075	Isobutyryl-L-carnitine	3-[(2-methylpropanoyl)oxy]-4-(trimethylazaniumyl)butanoate	-	Fatty Acyls [FA]	Fatty esters [FA07]	Fatty acyl carnitines [FA0707]	CAR 4:0
pos_605	Trifolirhizin	LMPK12070033	(-)-Maackiain 3-O-glucoside	-	Trifolirhizin	Polyketides [PK]	Flavonoids [PK12]	Pterocarpans [PK1207]	-
pos_606	6-Deoxocastasterone	LMST01030127	6-Deoxocastasterone	campestan-2alpha,3alpha,22R,23R-tetrol	-	Sterol Lipids [ST]	Sterols [ST01]	Ergosterols and C24-methyl derivatives [ST0103]	ST 28:0;O4
pos_607	11-Dehydro-thromboxane B2	LMFA03030014	11-Dehydro-thromboxane B2	(5E)-7-[(2R,3S,4S)-4-hydroxy-2-[(1E,3S)-3-hydroxyoct-1-en-1-yl]-6-oxooxan-3-yl]hept-5-enoic acid	-	Fatty Acyls [FA]	Eicosanoids [FA03]	Thromboxanes [FA0303]	FA 20:4;O4
pos_612	Isorhamnetin	LMPK12110002	Isorhamnetin	-	-	Polyketides [PK]	Flavonoids [PK12]	Flavones and Flavonols [PK1211]	-
pos_618	11-Ketoetiocholanolone	LMST02020087	11-Ketoetiocholanolone	-	-	Sterol Lipids [ST]	Steroids [ST02]	C19 steroids (androgens) and derivatives [ST0202]	ST 19:2;O3
pos_630	Linoleamide	LMFA08010008	Linoleamide	9Z,12Z-octadecadienamide	-	Fatty Acyls [FA]	Fatty amides [FA08]	Primary amides [FA0801]	-
pos_631	Lithocholic acid glycine conjugate	LMST05030009	Glycolithocholic Acid	N-[(3alpha,5beta)-3-hydroxy-24-oxocholan-24-yl]-glycine	Lithocholic acid glycine conjugate	Sterol Lipids [ST]	Steroid conjugates [ST05]	Glycine conjugates [ST0503]	ST 24:1;O3;G
pos_643	2-Hydroxy-6-pentadecylbenzoic acid	LMPK15040002	6-pentadecyl salicylic acid	2-hydroxy-6-pentadecylbenzoic acid	6-PDSA	Polyketides [PK]	Phenolic lipids [PK15]	Anacardic acids and derivatives [PK1504]	-
pos_653	1-Heptadecene-4,6-diyne-3,9-diol	LMFA05000599	1-Heptadecene-4,6-diyne-3,9-diol	heptadec-1-en-4,6-diyne-3,9-diol	-	Fatty Acyls [FA]	Fatty alcohols [FA05]	-	FOH 17:5;O
pos_659	Stearidonic acid	LMFA01030357	Stearidonic acid	6Z,9Z,12Z,15Z-octadecatetraenoic acid	Moroctic acid; C18:4n-3,6,9,12; Morotic acid	Fatty Acyls [FA]	Fatty Acids and Conjugates [FA01]	Unsaturated fatty acids [FA0103]	FA 18:4
pos_660	Octadecanol	LMFA05000085	stearyl alcohol	octadecan-1-ol	1-hydroxyoctadecane; 1-octadecanol; Stearylalkohol; n-1-octadecanol; n-octadecanol; n-octadecyl alcohol; octadecanol; stearyl alcohol	Fatty Acyls [FA]	Fatty alcohols [FA05]	-	FOH 18:0
pos_663	Myristic acid	LMFA01010014	Myristic acid	tetradecanoic acid	C14:0	Fatty Acyls [FA]	Fatty Acids and Conjugates [FA01]	Straight chain fatty acids [FA0101]	FA 14:0
pos_667	3-Pentadecylphenol	LMPK15010004	3-pentadecylphenol	3-pentadecylphenol	-	Polyketides [PK]	Phenolic lipids [PK15]	Alkyl phenols and derivatives [PK1501]	-
pos_669	Glycochenodeoxycholic acid 3-glucuronide	LMST05010048	Glycochenodeoxycholic acid 3-glucuronide	-	-	Sterol Lipids [ST]	Steroid conjugates [ST05]	Glucuronides [ST0501]	-
pos_685	4-Hydroxy-2,3,9-trimethoxypterocarpan	LMPK12070089	4-Hydroxy-2,3,9-trimethoxypterocarpan	-	-	Polyketides [PK]	Flavonoids [PK12]	Pterocarpans [PK1207]	-
pos_687	Ganoderic acid A	LMST01010391	Ganoderic acid A	(25R)-3,11,23-trioxo-7beta,15alpha-dihydroxy-lanost-8-ene-26-oic acid	-	Sterol Lipids [ST]	Sterols [ST01]	Cholesterol and derivatives [ST0101]	ST 30:5;O7
pos_689	N-Stearoyl phenylalanine	LMFA08020093	N-stearoyl phenylalanine	N-octadecanoyl-phenylalanine	-	Fatty Acyls [FA]	Fatty amides [FA08]	N-acyl amines [FA0802]	NA 27:5;O2
pos_695	Gamma-Linolenic acid	LMFA01030141	gamma-Linolenic acid	6Z,9Z,12Z-octadecatrienoic acid	cis-6, cis-9, cis-12-octadecatrienoic acid; C18:3n-6,9,12; GLA; Gammolenic acid; Gamolenic acid	Fatty Acyls [FA]	Fatty Acids and Conjugates [FA01]	Unsaturated fatty acids [FA0103]	FA 18:3
pos_699	Ginsenoside C	LMPR0106080016	Ginsenoside Rb2	(3beta,12beta)-20-[(6-O-alpha-L-arabinopyranosyl-beta-D-glucopyranosyl)oxy]-12-hydroxydammar-24-en-3-yl 2-O-beta-D-glucopyranosyl-beta-D-glucopyranoside	Ginsenoside C	Prenol Lipids [PR]	Isoprenoids [PR01]	C30 isoprenoids (triterpenes) [PR0106]	-
pos_705	1-(8Z,11Z,14Z-eicosatrienoyl)-glycero-3-phosphate	LMGP10050028	PA(20:3(8Z,11Z,14Z)/0:0)	1-(8Z,11Z,14Z-eicosatrienoyl)-glycero-3-phosphate	LPA(20:3)	Glycerophospholipids [GP]	Glycerophosphates [GP10]	Monoacylglycerophosphates [GP1005]	LPA 20:3
pos_709	5-Aminopentanoic acid	LMFA01100040	5-amino-pentanoic acid	5-amino-pentanoic acid	5-Aminopentanoic acid	Fatty Acyls [FA]	Fatty Acids and Conjugates [FA01]	Amino fatty acids [FA0110]	-
pos_718	PC(14:0/18:4(6Z,9Z,12Z,15Z))	LMGP01010499	PC(14:0/18:4(6Z,9Z,12Z,15Z))	1-tetradecanoyl-2-(6Z,9Z,12Z,15Z-octadecatetraenoyl)-sn-glycero-3-phosphocholine	PC(14:0/18:4); PC(32:4); PC(14:0_18:4)	Glycerophospholipids [GP]	Glycerophosphocholines [GP01]	Diacylglycerophosphocholines [GP0101]	PC 32:4
pos_72	3,5,7-Trimethyl-2E,4E,6E,8E-decatetraene	LMFA11000054	3,5,7-Trimethyl-2E,4E,6E,8E-decatetraene	3,5,7-Trimethyl-2E,4E,6E,8E-decatetraene	-	Fatty Acyls [FA]	Hydrocarbons [FA11]	-	-
pos_723	Leukotriene A4	LMFA03020023	LTA4	5S,6S-epoxy-7E,9E,11Z,14Z-eicosatetraenoic acid	Leukotriene A4	Fatty Acyls [FA]	Eicosanoids [FA03]	Leukotrienes [FA0302]	FA 20:5;O
pos_726	5,8,12-Trihydroxy-9-octadecenoic acid	LMFA02000221	5,8,12-TriHOME(9)	5,8,12-trihydroxy-9-octadecenoic acid	9-Octadecenoic acid, 5,8,12-trihydroxy-	Fatty Acyls [FA]	Octadecanoids [FA02]	Other Octadecanoids [FA0200]	FA 18:1;O3
pos_735	Abietinol	LMPR0104050006	abietol	abieta-7,13-dien-18-ol	Abietinol; Abietol; abietadienol; abietyl alcohol	Prenol Lipids [PR]	Isoprenoids [PR01]	C20 isoprenoids (diterpenes) [PR0104]	-
pos_755	Undecylenic acid	LMFA01030036	Undecylenic acid	10-undecenoic acid	10-undecylenic acid; C11:1n-1; 10-hendecenoic acid	Fatty Acyls [FA]	Fatty Acids and Conjugates [FA01]	Unsaturated fatty acids [FA0103]	FA 11:1
pos_76	(+)-Vulgraon B	LMPR0103490003	(+)-Vulgraon B	(+)-3-longipinen-5-one	-	Prenol Lipids [PR]	Isoprenoids [PR01]	C15 isoprenoids (sesquiterpenes) [PR0103]	-
pos_763	PC(o-16:0/20:4(8Z,11Z,14Z,17Z))	LMGP01020245	PC(O-16:0/20:4(8Z,11Z,14Z,17Z))	1-hexadecyl-2-(8Z,11Z,14Z,17Z-eicosatetraenoyl)-sn-glycero-3-phosphocholine	PC(O-36:4); PC(O-16:0/20:4)	Glycerophospholipids [GP]	Glycerophosphocholines [GP01]	1-alkyl,2-acylglycerophosphocholines [GP0102]	PC O-36:4
pos_769	Cucurbitaxanthin A	LMPR01070064	Cucurbitaxanthin A	-	-	Prenol Lipids [PR]	Isoprenoids [PR01]	C40 isoprenoids (tetraterpenes) [PR0107]	-
pos_775	1-Acetoxy-2-hydroxy-16-heptadecyn-4-one	LMFA05000595	1-Acetoxy-2-hydroxy-16-heptadecyn-4-one	2-hydroxy-4-oxoheptadec-16-yn-1-yl acetate	-	Fatty Acyls [FA]	Fatty alcohols [FA05]	-	FOH 19:4;O3
pos_779	Neuroprotectin D1	LMFA04040001	Neuroprotectin D1	10R,17S-dihydroxy-4Z,7Z,11E,13E,15Z,19Z-docosahexaenoic acid	NPD1; Protectin D1; PD1	Fatty Acyls [FA]	Docosanoids [FA04]	Protectins [FA0404]	FA 22:6;O2
pos_78	Chamazulene	LMPR0103410002	Chamazulene	-	-	Prenol Lipids [PR]	Isoprenoids [PR01]	C15 isoprenoids (sesquiterpenes) [PR0103]	-
pos_783	Limocitrol 3-glucoside	LMPK12113320	Limocitrol 3-glucoside	-	-	Polyketides [PK]	Flavonoids [PK12]	Flavones and Flavonols [PK1211]	-
pos_788	Cucurbitacin D	LMST01010106	Cucurbitacin D	-	-	Sterol Lipids [ST]	Sterols [ST01]	Cholesterol and derivatives [ST0101]	ST 30:5;O7
pos_8	Taurodeoxycholic acid	LMST05040013	Taurodeoxycholic acid	N-(3alpha,12alpha-dihydroxy-5beta-cholan-24-oyl)-taurine	Taurodeoxycholate	Sterol Lipids [ST]	Steroid conjugates [ST05]	Taurine conjugates [ST0504]	ST 24:1;O4;T
pos_80	Elongatin	LMPK12050312	Elongatin	-	-	Polyketides [PK]	Flavonoids [PK12]	Isoflavonoids [PK1205]	-
pos_801	Gamma-linolenyl carnitine	LMFA07070112	Gamma-linolenyl carnitine	(4S)-4-[(6Z,9Z,12Z)-octadeca-6,9,12-trienoyloxy]-4-(trimethylazaniumyl)butanoate	Gamma-linolenoyl carnitine; O-((6Z,9Z,12Z)-octadecacatrienoyl)-S-carnitine	Fatty Acyls [FA]	Fatty esters [FA07]	Fatty acyl carnitines [FA0707]	CAR 18:3
pos_802	Narirutin	LMPK12140236	Narirutin	-	Isonaringin; Naringenin 7-O-rutinoside	Polyketides [PK]	Flavonoids [PK12]	Flavanones [PK1214]	-
pos_805	Capric acid	LMFA01010010	Capric acid	Decanoic acid	C10:0; Caprinic acid; Decoic acid; Decylic acid	Fatty Acyls [FA]	Fatty Acids and Conjugates [FA01]	Straight chain fatty acids [FA0101]	FA 10:0
pos_809	Hexadecanedioic acid	LMFA01170022	Thapsic acid	Hexadecanedioic acid	Thaspic acid	Fatty Acyls [FA]	Fatty Acids and Conjugates [FA01]	Dicarboxylic acids [FA0117]	FA 16:1;O2
pos_813	Phytosphingosine	LMSP01030001	Phytosphingosine	4R-hydroxysphinganine	4-hydroxysphinganine	Sphingolipids [SP]	Sphingoid bases [SP01]	4-Hydroxysphinganines (Phytosphingosines) [SP0103]	SPB 18:0;O3
pos_818	Avocadene 1-acetate	LMFA05000640	Avocadene 1-acetate	2,4-dihydroxyheptadec-16-en-1-yl acetate	-	Fatty Acyls [FA]	Fatty alcohols [FA05]	-	FOH 19:2;O3
pos_82	16-fluoro-7Z-hexadecenoic acid	LMFA01090049	16-fluoro-7Z-hexadecenoic acid	16-fluoro-7Z-hexadecenoic acid	16:1(7Z)(16F)	Fatty Acyls [FA]	Fatty Acids and Conjugates [FA01]	Halogenated fatty acids [FA0109]	-
pos_825	1-(6Z,9Z,12Z-octadecatrienoyl)-glycero-3-phosphate	LMGP10050023	PA(18:3(6Z,9Z,12Z)/0:0)	1-(6Z,9Z,12Z-octadecatrienoyl)-glycero-3-phosphate	LPA(18:3)	Glycerophospholipids [GP]	Glycerophosphates [GP10]	Monoacylglycerophosphates [GP1005]	LPA 18:3
pos_83	8Z,11Z,14Z-heptadecatrienoic acid	LMFA01030756	Norlinolenic acid	8Z,11Z,14Z-heptadecatrienoic acid	C17:3n-3,6,9	Fatty Acyls [FA]	Fatty Acids and Conjugates [FA01]	Unsaturated fatty acids [FA0103]	FA 17:3
pos_830	Isoamyl 2-furonpropionate	LMFA07010913	Isoamyl 2-furonpropionate	3-methylbutyl 3-(furan-2-yl)propanoate	-	Fatty Acyls [FA]	Fatty esters [FA07]	Wax monoesters [FA0701]	WE 12:3;O
pos_85	Ipomeamaronol	LMFA05000668	Ipomeamaronol	1-[5-(furan-3-yl)-2-methyloxolan-2-yl]-5-hydroxy-4-methylpentan-2-one	-	Fatty Acyls [FA]	Fatty alcohols [FA05]	-	FOH 15:5;O3
pos_856	N-Ethyl trans-2-cis-6-nonadienamide	LMFA08020193	N-Ethyl trans-2-cis-6-nonadienamide	(2E,6Z)-N-ethylnona-2,6-dienamide	-	Fatty Acyls [FA]	Fatty amides [FA08]	N-acyl amines [FA0802]	NA 11:2
pos_86	(11Z)-8,18-propano-retinal	LMPR01090045	(11Z)-8,18-propano-retinal	-	-	Prenol Lipids [PR]	Isoprenoids [PR01]	Retinoids [PR0109]	-
pos_87	9,12,15-Octadecatrien-1-ol	LMFA05000216	9,12,15-Octadecatrien-1-ol	9,12,15-Octadecatrien-1-ol	-	Fatty Acyls [FA]	Fatty alcohols [FA05]	-	FOH 18:3
pos_871	Chenodeoxycholic acid glycine conjugate	LMST05030008	Glycochenodeoxycholic acid	N-(3alpha,7alpha-dihydroxy-5beta-cholan-24-oyl)-glycine	Chenodeoxycholic acid glycine conjugate; Chenoglycodeoxycholic acid	Sterol Lipids [ST]	Steroid conjugates [ST05]	Glycine conjugates [ST0503]	ST 24:1;O4;G
pos_884	Anandamide	LMFA08040056	Anandamide-d4 (20:4, n-6)	N-(2-hydroxyethyl-1,1,2,2-d4)-5Z,8Z,11Z,14Z-eicosatetraenamide	Anandamide; Anandamide(20:4, n-6); N-arachidonoyl ethanolamine; arachidonoylethanolamide; Arachidonoyl-EA; Arachidonoyl ethanolamide; AEA	Fatty Acyls [FA]	Fatty amides [FA08]	N-acyl ethanolamines (endocannabinoids) [FA0804]	-
pos_889	PI(16:0/20:0)	LMGP06010942	PI(16:0/20:0)	1-hexadecanoyl-2-eicosanoyl-glycero-3-phospho-(1'-myo-inositol)	PI(36:0); PI(16:0_20:0)	Glycerophospholipids [GP]	Glycerophosphoinositols [GP06]	Diacylglycerophosphoinositols [GP0601]	PI 36:0
pos_89	Strobopinin	LMPK12140187	Strobopinin	-	-	Polyketides [PK]	Flavonoids [PK12]	Flavanones [PK1214]	-
pos_890	2'-O-Methylphaseollinisoflavan	LMPK12080015	2'-O-Methylphaseollinisoflavan	-	-	Polyketides [PK]	Flavonoids [PK12]	Isoflavans [PK1208]	-
pos_892	Amphotericin B	LMPK06000002	Amphotericin B	-	-	Polyketides [PK]	Polyenes [PK06]	-	-
pos_9	Retinoic acid	LMPR01090019	Retinoic Acid	3,7-dimethyl-9-(2,6,6-trimethylcyclohexen-1-yl)nona-2E,4E,6E,8E-tetraenoic acid	Tretinoin/All-Trans Retinoic Acid	Prenol Lipids [PR]	Isoprenoids [PR01]	Retinoids [PR0109]	-
pos_90	Peltogynan	LMPK12020154	Peltogynan	-	-	Polyketides [PK]	Flavonoids [PK12]	Flavans, Flavanols and Leucoanthocyanidins [PK1202]	-
pos_914	TG(18:3(9Z,12Z,15Z)/20:4(5Z,8Z,11Z,14Z)/22:6(4Z,7Z,10Z,13Z,16Z,19Z))[iso6]	LMGL03012094	TG(18:3(9Z,12Z,15Z)/20:4(5Z,8Z,11Z,14Z)/22:6(4Z,7Z,10Z,13Z,16Z,19Z))[iso6]	1-(9Z,12Z,15Z-octadecatrienoyl)-2-(5Z,8Z,11Z,14Z-eicosatetraenoyl)-3-(4Z,7Z,10Z,13Z,16Z,19Z-docosahexaenoyl)-sn-glycerol	TG(18:3/20:4/22:6)[iso6]; TG(60:13); TG(18:3_20:4_22:6)	Glycerolipids [GL]	Triradylglycerols [GL03]	Triacylglycerols [GL0301]	TG 60:13
pos_919	4-Hydroxyandrostenedione glucuronide	LMST05010040	4-Hydroxyandrostenedione glucuronide	-	-	Sterol Lipids [ST]	Steroid conjugates [ST05]	Glucuronides [ST0501]	ST 19:3;O3;GlcA
pos_932	Falcarindiol	LMFA05000658	Falcarindiol	(3R,8S,9Z)-heptadeca-1,9-dien-4,6-diyne-3,8-diol	(3R,8S)-Falcarindiol; (3R,8S,9Z)-heptadeca-1,9-dien-4,6-diyne-3,8-diol; (3S,8S)-Falcarindiol; AC1NQY3Z	Fatty Acyls [FA]	Fatty alcohols [FA05]	-	FOH 17:6;O
pos_961	2-Octenedioic acid	LMFA01170085	2-octenedioic acid	2E-octenedioic acid	-	Fatty Acyls [FA]	Fatty Acids and Conjugates [FA01]	Dicarboxylic acids [FA0117]	FA 8:2;O2
pos_97	5-(1-oxopropan-2-yl)isolongifol-5-ene	LMPR0103500011	5-(1-oxopropan-2-yl)isolongifol-5-ene	2-[(1S,8S)-2,2,7,7-tetramethyltricyclo[6.2.1.0(1,6)]undec-5-en-5-yl]propanal	2-(2,2,7,7-tetramethyltricyclo[6.2.1.0(1,6)]undec-5-en-5-yl)propanal	Prenol Lipids [PR]	Isoprenoids [PR01]	C15 isoprenoids (sesquiterpenes) [PR0103]	-
