# Supplementary material for: Multi-omics analyses reveal that the gut microbiome and its metabolites promote milk fat synthesis in Zhongdian yak cows
Source: PeerJ journal article supplement (doi:10.7717/peerj.14444), 2022-12-02
Supplement: biomarker_Web_Report_.zip [file meta_lipidmaps_anno_categroy.xls]

CATEGORY	MAIN_CLASS	Metabolites_nums	Metabolites
Fatty Acyls [FA]	Docosanoids [FA04]	127	pos_366 pos_50 pos_1252 pos_82 pos_563 pos_513 pos_1096 pos_663 pos_412 pos_1005 pos_2479 pos_560 pos_1982 pos_653 pos_884 pos_288 pos_2365 pos_2744 pos_709 pos_1973 pos_1570 pos_775 pos_2760 pos_1173 pos_577 pos_2726 pos_1490 pos_1940 pos_1659 pos_157 pos_1477 pos_2666 pos_2759 pos_494 pos_85 pos_1253 pos_809 pos_779 pos_114 pos_1489 pos_818 pos_271 pos_856 pos_2337 pos_459 pos_1714 pos_801 pos_…
Fatty Acyls [FA]	Eicosanoids [FA03]	64	pos_366 pos_50 pos_1253 pos_659 pos_809 pos_454 pos_723 pos_1252 pos_2372 pos_82 pos_271 pos_2122 pos_2782 pos_2337 pos_1096 pos_1030 pos_186 pos_1714 pos_1005 pos_663 pos_805 pos_961 pos_2687 pos_14 pos_541 pos_2026 pos_281 pos_560 pos_219 pos_1601 pos_1982 pos_755 pos_180 pos_288 pos_695 pos_1219 pos_2696 pos_2812 pos_478 pos_607 pos_110 pos_177 pos_450 pos_1904 pos_1705 pos_709 pos_499 pos_129…
Fatty Acyls [FA]	Fatty Acids and Conjugates [FA01]	43	pos_366 pos_659 pos_809 pos_454 pos_1252 pos_2372 pos_82 pos_271 pos_1030 pos_186 pos_1714 pos_1005 pos_663 pos_805 pos_961 pos_2687 pos_14 pos_2026 pos_281 pos_560 pos_755 pos_288 pos_695 pos_1219 pos_2696 pos_2812 pos_478 pos_450 pos_1904 pos_1705 pos_709 pos_499 pos_1291 pos_1973 pos_1355 pos_2760 pos_1173 pos_83 pos_2726 pos_157 pos_1590 pos_1633 pos_554
Fatty Acyls [FA]	Fatty acyl glycosides [FA13]	105	pos_366 pos_50 pos_1252 pos_82 pos_563 pos_513 pos_1096 pos_663 pos_1005 pos_2479 pos_560 pos_1982 pos_884 pos_288 pos_2365 pos_2744 pos_709 pos_1973 pos_2760 pos_1173 pos_577 pos_2726 pos_1940 pos_1659 pos_157 pos_2666 pos_2759 pos_494 pos_1253 pos_809 pos_114 pos_1489 pos_271 pos_856 pos_2337 pos_459 pos_1714 pos_801 pos_2026 pos_240 pos_450 pos_1904 pos_604 pos_2732 pos_101 pos_83 pos_2166 pos…
Fatty Acyls [FA]	Fatty alcohols [FA05]	124	pos_366 pos_50 pos_1252 pos_82 pos_563 pos_513 pos_1096 pos_663 pos_412 pos_1005 pos_2479 pos_560 pos_1982 pos_653 pos_884 pos_288 pos_2365 pos_2744 pos_709 pos_1973 pos_1570 pos_775 pos_2760 pos_1173 pos_577 pos_2726 pos_1490 pos_1940 pos_1659 pos_157 pos_2666 pos_2759 pos_494 pos_85 pos_1253 pos_809 pos_114 pos_1489 pos_818 pos_271 pos_856 pos_2337 pos_459 pos_1714 pos_801 pos_2026 pos_200 pos_…
Fatty Acyls [FA]	Fatty aldehydes [FA06]	50	pos_366 pos_659 pos_809 pos_454 pos_1252 pos_2372 pos_82 pos_271 pos_1030 pos_186 pos_1714 pos_1005 pos_663 pos_805 pos_961 pos_2687 pos_14 pos_541 pos_2026 pos_281 pos_560 pos_219 pos_755 pos_180 pos_288 pos_695 pos_1219 pos_2696 pos_2812 pos_478 pos_110 pos_177 pos_450 pos_1904 pos_1705 pos_709 pos_499 pos_1291 pos_265 pos_1973 pos_101 pos_1355 pos_2760 pos_1173 pos_83 pos_2726 pos_157 pos_1590…
Fatty Acyls [FA]	Fatty amides [FA08]	80	pos_366 pos_50 pos_1252 pos_82 pos_513 pos_1096 pos_663 pos_1005 pos_560 pos_1982 pos_884 pos_288 pos_709 pos_1973 pos_2760 pos_1173 pos_577 pos_2726 pos_1940 pos_157 pos_1253 pos_809 pos_1489 pos_271 pos_856 pos_2337 pos_1714 pos_2026 pos_450 pos_1904 pos_101 pos_83 pos_2166 pos_1623 pos_1803 pos_961 pos_554 pos_2122 pos_362 pos_805 pos_723 pos_2687 pos_281 pos_219 pos_180 pos_1219 pos_478 pos_6…
Fatty Acyls [FA]	Fatty esters [FA07]	104	pos_366 pos_50 pos_1252 pos_82 pos_563 pos_513 pos_1096 pos_663 pos_1005 pos_2479 pos_560 pos_1982 pos_884 pos_288 pos_2365 pos_2744 pos_709 pos_1973 pos_2760 pos_1173 pos_577 pos_2726 pos_1940 pos_1659 pos_157 pos_2666 pos_2759 pos_494 pos_1253 pos_809 pos_1489 pos_271 pos_856 pos_2337 pos_459 pos_1714 pos_801 pos_2026 pos_240 pos_450 pos_1904 pos_604 pos_2732 pos_101 pos_83 pos_2166 pos_1623 po…
Fatty Acyls [FA]	Hydrocarbons [FA11]	134	pos_366 pos_50 pos_1252 pos_82 pos_563 pos_513 pos_1096 pos_663 pos_412 pos_1005 pos_2479 pos_560 pos_1982 pos_653 pos_884 pos_288 pos_2365 pos_46 pos_2744 pos_709 pos_25 pos_1973 pos_1570 pos_775 pos_2760 pos_1173 pos_577 pos_2726 pos_1490 pos_1940 pos_1659 pos_157 pos_1477 pos_463 pos_2666 pos_2759 pos_494 pos_85 pos_1253 pos_809 pos_779 pos_114 pos_1489 pos_818 pos_271 pos_856 pos_2337 pos_459…
Fatty Acyls [FA]	Octadecanoids [FA02]	131	pos_366 pos_50 pos_1252 pos_82 pos_563 pos_513 pos_1096 pos_663 pos_412 pos_1005 pos_2479 pos_560 pos_1982 pos_653 pos_884 pos_288 pos_2365 pos_2744 pos_709 pos_25 pos_1973 pos_1570 pos_775 pos_2760 pos_1173 pos_577 pos_2726 pos_1490 pos_1940 pos_1659 pos_157 pos_1477 pos_463 pos_2666 pos_2759 pos_494 pos_85 pos_1253 pos_809 pos_779 pos_114 pos_1489 pos_818 pos_271 pos_856 pos_2337 pos_459 pos_17…
Fatty Acyls [FA]	Oxygenated hydrocarbons [FA12]	128	pos_366 pos_50 pos_1252 pos_82 pos_563 pos_513 pos_1096 pos_663 pos_412 pos_1005 pos_2479 pos_560 pos_1982 pos_653 pos_884 pos_288 pos_2365 pos_2744 pos_709 pos_25 pos_1973 pos_1570 pos_775 pos_2760 pos_1173 pos_577 pos_2726 pos_1490 pos_1940 pos_1659 pos_157 pos_1477 pos_2666 pos_2759 pos_494 pos_85 pos_1253 pos_809 pos_779 pos_114 pos_1489 pos_818 pos_271 pos_856 pos_2337 pos_459 pos_1714 pos_8…
Glycerolipids [GL]	Diradylglycerols [GL02]	2	pos_1442 pos_250
Glycerolipids [GL]	Glycosylmonoradylglycerols [GL04]	3	pos_1442 pos_250 pos_527
Glycerolipids [GL]	Triradylglycerols [GL03]	4	pos_1442 pos_914 pos_250 pos_527
Glycerophospholipids [GP]	CDP-Glycerols [GP13]	67	pos_1339 pos_1207 pos_2801 pos_115 pos_1593 pos_1017 pos_1876 pos_423 pos_2341 pos_1684 pos_2159 pos_718 pos_2195 pos_2151 pos_1863 pos_1143 pos_1301 pos_889 pos_2239 pos_1503 pos_2138 pos_2769 pos_1603 pos_331 pos_2755 pos_1963 pos_2521 pos_1898 pos_1257 pos_1168 pos_2035 pos_2305 pos_1161 pos_1270 pos_2615 pos_705 pos_2743 pos_1865 pos_2809 pos_1430 pos_1926 pos_441 pos_1295 pos_2752 pos_2175 p…
Glycerophospholipids [GP]	Glycerophosphates [GP10]	40	pos_1339 pos_2801 pos_115 pos_1017 pos_423 pos_2341 pos_2159 pos_2151 pos_1863 pos_1143 pos_1301 pos_1503 pos_2138 pos_1603 pos_331 pos_1963 pos_1898 pos_1257 pos_1168 pos_2035 pos_2305 pos_1161 pos_705 pos_2809 pos_441 pos_1295 pos_2752 pos_111 pos_2559 pos_1125 pos_1819 pos_825 pos_2641 pos_1007 pos_2119 pos_2787 pos_2683 pos_1604 pos_260 pos_1067
Glycerophospholipids [GP]	Glycerophosphocholines [GP01]	51	pos_1339 pos_1207 pos_2801 pos_115 pos_1017 pos_423 pos_2341 pos_1684 pos_2159 pos_718 pos_2151 pos_1863 pos_1143 pos_1301 pos_1503 pos_2138 pos_2769 pos_1603 pos_331 pos_2755 pos_1963 pos_1898 pos_1257 pos_1168 pos_2035 pos_2305 pos_1161 pos_1270 pos_2615 pos_705 pos_1865 pos_2809 pos_1430 pos_441 pos_1295 pos_2752 pos_111 pos_2559 pos_1125 pos_1819 pos_825 pos_2641 pos_1007 pos_763 pos_2119 pos…
Glycerophospholipids [GP]	Glycerophosphoethanolamines [GP02]	19	pos_1339 pos_1017 pos_423 pos_2341 pos_2159 pos_2151 pos_1143 pos_1503 pos_331 pos_1963 pos_1257 pos_2035 pos_2305 pos_1295 pos_111 pos_2559 pos_2641 pos_1007 pos_1067
Glycerophospholipids [GP]	Glycerophosphoglycerols [GP04]	62	pos_1339 pos_1207 pos_2801 pos_115 pos_1593 pos_1017 pos_423 pos_2341 pos_1684 pos_2159 pos_718 pos_2195 pos_2151 pos_1863 pos_1143 pos_1301 pos_889 pos_1503 pos_2138 pos_2769 pos_1603 pos_331 pos_2755 pos_1963 pos_1898 pos_1257 pos_1168 pos_2035 pos_2305 pos_1161 pos_1270 pos_2615 pos_705 pos_2743 pos_1865 pos_2809 pos_1430 pos_1926 pos_441 pos_1295 pos_2752 pos_111 pos_2559 pos_1125 pos_1819 po…
Glycerophospholipids [GP]	Glycerophosphoglycerophosphates [GP05]	63	pos_1339 pos_1207 pos_2801 pos_115 pos_1593 pos_1017 pos_1876 pos_423 pos_2341 pos_1684 pos_2159 pos_718 pos_2195 pos_2151 pos_1863 pos_1143 pos_1301 pos_889 pos_1503 pos_2138 pos_2769 pos_1603 pos_331 pos_2755 pos_1963 pos_1898 pos_1257 pos_1168 pos_2035 pos_2305 pos_1161 pos_1270 pos_2615 pos_705 pos_2743 pos_1865 pos_2809 pos_1430 pos_1926 pos_441 pos_1295 pos_2752 pos_111 pos_2559 pos_1125 po…
Glycerophospholipids [GP]	Glycerophosphoinositols [GP06]	56	pos_1339 pos_1207 pos_2801 pos_115 pos_1017 pos_423 pos_2341 pos_1684 pos_2159 pos_718 pos_2151 pos_1863 pos_1143 pos_1301 pos_889 pos_1503 pos_2138 pos_2769 pos_1603 pos_331 pos_2755 pos_1963 pos_1898 pos_1257 pos_1168 pos_2035 pos_2305 pos_1161 pos_1270 pos_2615 pos_705 pos_1865 pos_2809 pos_1430 pos_441 pos_1295 pos_2752 pos_111 pos_2559 pos_1125 pos_1819 pos_825 pos_2632 pos_2641 pos_1007 pos…
Glycerophospholipids [GP]	Glycerophosphoserines [GP03]	31	pos_1339 pos_2801 pos_1017 pos_423 pos_2341 pos_2159 pos_2151 pos_1143 pos_1301 pos_1503 pos_2138 pos_331 pos_1963 pos_1898 pos_1257 pos_2035 pos_2305 pos_1161 pos_2809 pos_1295 pos_111 pos_2559 pos_1125 pos_1819 pos_2641 pos_1007 pos_2119 pos_2787 pos_2683 pos_1604 pos_1067
Polyketides [PK]	Aromatic polyketides [PK13]	61	pos_2194 pos_802 pos_1193 pos_203 pos_1289 pos_80 pos_685 pos_2120 pos_179 pos_612 pos_783 pos_225 pos_486 pos_1312 pos_2301 pos_257 pos_605 pos_2596 pos_56 pos_1859 pos_27 pos_1101 pos_1763 pos_130 pos_278 pos_1033 pos_100 pos_1930 pos_142 pos_2080 pos_890 pos_1104 pos_187 pos_1557 pos_348 pos_427 pos_89 pos_1038 pos_376 pos_2361 pos_2281 pos_1406 pos_315 pos_297 pos_33 pos_335 pos_381 pos_2385 …
Polyketides [PK]	Flavonoids [PK12]	57	pos_2194 pos_802 pos_1193 pos_203 pos_1289 pos_80 pos_685 pos_2120 pos_179 pos_612 pos_783 pos_225 pos_486 pos_1312 pos_2301 pos_257 pos_605 pos_2596 pos_56 pos_1859 pos_27 pos_1101 pos_1763 pos_278 pos_1033 pos_100 pos_1930 pos_142 pos_2080 pos_890 pos_187 pos_1557 pos_348 pos_427 pos_89 pos_376 pos_2361 pos_2281 pos_1406 pos_315 pos_297 pos_33 pos_335 pos_381 pos_2385 pos_90 pos_567 pos_117 pos…
Polyketides [PK]	Linear tetracyclines [PK07]	60	pos_2194 pos_802 pos_1193 pos_203 pos_1289 pos_80 pos_685 pos_2120 pos_179 pos_612 pos_783 pos_225 pos_486 pos_1312 pos_2301 pos_257 pos_605 pos_2596 pos_56 pos_1859 pos_27 pos_1101 pos_1763 pos_278 pos_1033 pos_100 pos_1930 pos_142 pos_2080 pos_890 pos_1104 pos_187 pos_1557 pos_348 pos_427 pos_89 pos_1038 pos_376 pos_2361 pos_2281 pos_1406 pos_315 pos_297 pos_33 pos_335 pos_381 pos_2385 pos_90 p…
Polyketides [PK]	Macrolides and lactone polyketides [PK04]	59	pos_2194 pos_802 pos_1193 pos_203 pos_1289 pos_80 pos_685 pos_2120 pos_179 pos_612 pos_783 pos_225 pos_486 pos_1312 pos_2301 pos_257 pos_605 pos_2596 pos_56 pos_1859 pos_27 pos_1101 pos_1763 pos_278 pos_1033 pos_100 pos_1930 pos_142 pos_2080 pos_890 pos_187 pos_1557 pos_348 pos_427 pos_89 pos_1038 pos_376 pos_2361 pos_2281 pos_1406 pos_315 pos_297 pos_33 pos_335 pos_381 pos_2385 pos_90 pos_2830 p…
Polyketides [PK]	Non-ribosomal peptide/polyketide hybrids [PK14]	66	pos_2194 pos_802 pos_1193 pos_203 pos_22 pos_1289 pos_80 pos_685 pos_2120 pos_179 pos_612 pos_783 pos_225 pos_486 pos_1312 pos_2301 pos_257 pos_605 pos_2596 pos_56 pos_1859 pos_27 pos_2826 pos_1101 pos_1763 pos_130 pos_278 pos_1033 pos_643 pos_100 pos_1930 pos_142 pos_2080 pos_890 pos_1104 pos_187 pos_1557 pos_348 pos_427 pos_89 pos_1038 pos_376 pos_2361 pos_2811 pos_2281 pos_1406 pos_315 pos_297…
Polyketides [PK]	Phenolic lipids [PK15]	65	pos_2194 pos_802 pos_1193 pos_203 pos_22 pos_1289 pos_80 pos_685 pos_2120 pos_179 pos_612 pos_783 pos_225 pos_486 pos_1312 pos_2301 pos_257 pos_605 pos_2596 pos_56 pos_1859 pos_27 pos_2826 pos_1101 pos_1763 pos_130 pos_278 pos_1033 pos_643 pos_100 pos_1930 pos_142 pos_2080 pos_890 pos_1104 pos_187 pos_1557 pos_348 pos_427 pos_89 pos_1038 pos_376 pos_2361 pos_2281 pos_1406 pos_315 pos_297 pos_33 p…
Polyketides [PK]	Polyenes [PK06]	67	pos_2194 pos_802 pos_892 pos_1193 pos_203 pos_22 pos_1289 pos_80 pos_685 pos_2120 pos_179 pos_612 pos_783 pos_225 pos_486 pos_1312 pos_2301 pos_257 pos_605 pos_2596 pos_56 pos_1859 pos_27 pos_2826 pos_1101 pos_1763 pos_130 pos_278 pos_1033 pos_643 pos_100 pos_1930 pos_142 pos_2080 pos_890 pos_1104 pos_187 pos_1557 pos_348 pos_427 pos_89 pos_1038 pos_376 pos_2361 pos_2811 pos_2281 pos_1406 pos_315…
Prenol Lipids [PR]	Isoprenoids [PR01]	36	pos_147 pos_735 pos_1787 pos_106 pos_2321 pos_76 pos_1783 pos_97 pos_769 pos_699 pos_301 pos_129 pos_2832 pos_467 pos_2823 pos_178 pos_2029 pos_199 pos_2729 pos_1077 pos_1799 pos_55 pos_283 pos_1579 pos_9 pos_2308 pos_1265 pos_151 pos_166 pos_34 pos_78 pos_44 pos_153 pos_86 pos_49 pos_191
Prenol Lipids [PR]	Polyprenols [PR03]	37	pos_147 pos_735 pos_1787 pos_106 pos_2321 pos_76 pos_1783 pos_97 pos_769 pos_699 pos_301 pos_129 pos_2832 pos_467 pos_2823 pos_178 pos_2029 pos_199 pos_2729 pos_1077 pos_1799 pos_55 pos_283 pos_1579 pos_1282 pos_9 pos_2308 pos_1265 pos_151 pos_166 pos_34 pos_78 pos_44 pos_153 pos_86 pos_49 pos_191
Prenol Lipids [PR]	Quinones and hydroquinones [PR02]	42	pos_147 pos_735 pos_1752 pos_1787 pos_106 pos_2321 pos_76 pos_1783 pos_97 pos_769 pos_2466 pos_699 pos_301 pos_129 pos_2832 pos_467 pos_2823 pos_178 pos_2029 pos_199 pos_2729 pos_1077 pos_1799 pos_55 pos_2853 pos_283 pos_1579 pos_1282 pos_9 pos_1844 pos_2308 pos_1265 pos_1383 pos_151 pos_166 pos_34 pos_78 pos_44 pos_153 pos_86 pos_49 pos_191
Sphingolipids [SP]	Ceramides [SP02]	4	pos_28 pos_1079 pos_1983 pos_2030
Sphingolipids [SP]	Neutral glycosphingolipids [SP05]	5	pos_1248 pos_1079 pos_28 pos_2030 pos_1983
Sphingolipids [SP]	Phosphosphingolipids [SP03]	11	pos_1741 pos_1248 pos_1256 pos_2538 pos_1079 pos_28 pos_2818 pos_2851 pos_2030 pos_813 pos_1983
Sphingolipids [SP]	Sphingoid bases [SP01]	9	pos_1248 pos_1256 pos_1079 pos_28 pos_2818 pos_2851 pos_2030 pos_813 pos_1983
Sterol Lipids [ST]	Bile acids and derivatives [ST04]	6	pos_10 pos_1956 pos_3 pos_1055 pos_396 pos_1234
Sterol Lipids [ST]	Secosteroids [ST03]	63	pos_1480 pos_10 pos_1148 pos_1003 pos_2481 pos_1900 pos_562 pos_631 pos_1109 pos_2761 pos_8 pos_871 pos_3 pos_1055 pos_396 pos_1169 pos_1050 pos_606 pos_1407 pos_1234 pos_919 pos_2135 pos_2735 pos_2155 pos_359 pos_1617 pos_2072 pos_1218 pos_270 pos_438 pos_2020 pos_198 pos_687 pos_1204 pos_2353 pos_416 pos_1956 pos_1146 pos_669 pos_2054 pos_1191 pos_1637 pos_2074 pos_507 pos_517 pos_57 pos_1868 p…
Sterol Lipids [ST]	Steroid conjugates [ST05]	62	pos_1480 pos_10 pos_1148 pos_1003 pos_2481 pos_1900 pos_562 pos_631 pos_1109 pos_2761 pos_8 pos_871 pos_3 pos_1055 pos_396 pos_1169 pos_1050 pos_606 pos_1407 pos_1234 pos_919 pos_2135 pos_2735 pos_2155 pos_359 pos_1617 pos_2072 pos_1218 pos_270 pos_438 pos_2020 pos_198 pos_687 pos_1204 pos_2353 pos_416 pos_1956 pos_1146 pos_669 pos_2054 pos_1191 pos_1637 pos_2074 pos_507 pos_517 pos_57 pos_1868 p…
Sterol Lipids [ST]	Steroids [ST02]	31	pos_1480 pos_10 pos_1148 pos_1003 pos_2481 pos_1900 pos_562 pos_3 pos_1055 pos_396 pos_1169 pos_1407 pos_1234 pos_1617 pos_2072 pos_270 pos_438 pos_2020 pos_1204 pos_2353 pos_1956 pos_1146 pos_507 pos_517 pos_1868 pos_1638 pos_2298 pos_2542 pos_2063 pos_594 pos_618
Sterol Lipids [ST]	Sterols [ST01]	51	pos_1480 pos_10 pos_1148 pos_1003 pos_2481 pos_1900 pos_562 pos_1109 pos_2761 pos_3 pos_1055 pos_396 pos_1169 pos_1050 pos_606 pos_1407 pos_1234 pos_2735 pos_359 pos_1617 pos_2072 pos_1218 pos_270 pos_438 pos_2020 pos_198 pos_687 pos_1204 pos_2353 pos_416 pos_1956 pos_1146 pos_2054 pos_1191 pos_1637 pos_507 pos_517 pos_57 pos_1868 pos_1638 pos_788 pos_1155 pos_1158 pos_2298 pos_2542 pos_2063 pos_…
