# Supplementary material for: Multi-omics analyses reveal that the gut microbiome and its metabolites promote milk fat synthesis in Zhongdian yak cows
Source: PeerJ journal article supplement (doi:10.7717/peerj.14444), 2022-12-02
Supplement: biomarker_Web_Report_.zip [file metabolites_full_table.xls]

#ID	name	H1	H2	H3	H4	H5	H6	L2	L6	L1	L4	L5	L3	H_vs_L_log2FC	H_vs_L_Pvalue	H_vs_L_VIP	H_vs_L_(FC_1_Pvalue_0.05_VIP_1)_regulated	KEGG_annotation	KEGG_pathway_annotation	LM_ID	NAME	SYSTEMATIC_NAME	SYNONYMS	CATEGORY(lipidmaps)	MAIN_CLASS(lipidmaps)	SUB_CLASS(lipidmaps)	HMDB_ID	kingdom(HMDB)	super_class(HMDB)	HMDB_taxonomy	sub_class(HMDB)	pubchem_compound_id(HMDB)	cas_registry_number(HMDB)
pos_1	D-erythro-Dihydrosphingosine	0.000143373613404701	0.000280516099889959	0.000224718909490409	0.000254417617725337	0.00016750424081482	0.000200086248543327	0.000139869306485217	0.000141074891906182	0.000130812981686961	0.000127429588182838	0.000157863228276111	0.000124289239886146	-0.596313270704428	0.0156423085365592	2.28980826228015	down	C00836	Sphingolipid metabolism(ko00600);;Sphingolipid signaling pathway(ko04071);;Metabolic pathways(ko01100)	--	--	--	--	--	--	--	HMDB0000269	Organic compounds	Organic nitrogen compounds	Organonitrogen compounds	Amines	91486	764-22-7
pos_10	Deoxycholic acid	0.0271025015361995	0.022745320979762	0.0670788851770679	0.0597087546104036	0.0754371883493432	0.0578048511713294	0.0490250201416075	0.0440506703924097	0.0684691105283223	0.0536639780874919	0.0570077802127478	0.0520879671705176	0.188322492445321	0.807484585023284	0.166396575844911	unchanged	C04483	Bile secretion(ko04976)	LMST04010040	Deoxycholic acid	3alpha,12alpha-Dihydroxy-5beta-cholan-24-oic Acid	-	Sterol Lipids [ST]	Bile acids and derivatives [ST04]	C24 bile acids, alcohols, and derivatives [ST0401]	--	--	--	--	--	--	--
pos_100	Dihydroscoparin	3.39668072962394e-05	4.77892415245145e-05	7.52120583590671e-05	0.000224025674881867	8.73793923402068e-05	2.03705463933448e-05	4.8823197771671e-05	3.2263567000144e-05	6.93457125590401e-05	4.25746516619048e-05	0.000130961626000574	9.17680508017233e-05	0.0331988253766227	0.729220962388568	0.500505210930602	unchanged	--	--	LMPK12140433	Dihydroscoparin	-	-	Polyketides [PK]	Flavonoids [PK12]	Flavanones [PK1214]	--	--	--	--	--	--	--
pos_1000	Lansioside C	0.000923806234985915	0.000463087908401238	0.000410119036086324	0.00040159160998322	0.000476206062915908	0.000493218711631254	0.000509510990697741	0.000487006349781475	0.000460741887322162	0.000435062366240488	0.000467326727086756	0.000474187485748591	-0.097722958847335	0.522327429598366	0.779795025602833	unchanged	--	--	--	--	--	--	--	--	--	--	--	--	--	--	--	--
pos_1001	Hexylamine	4.01384358402482e-12	3.9576159497502e-12	6.57739001429416e-07	0	0	0	2.40099525812225e-06	2.22730488235693e-06	0	4.64508343563833e-09	1.20430046582174e-06	0.000485108730413289	14.1446314452256	0.357499221591929	1.04339282770617	unchanged	--	--	--	--	--	--	--	--	--	HMDB0032323	Organic compounds	Organic nitrogen compounds	Organonitrogen compounds	Amines	8102	111-26-2
pos_1002	Ginsenoyne I	4.53350425687984e-06	9.75242210291292e-06	8.47109894285107e-06	1.02142773637819e-05	1.21264494948e-05	9.52843959345179e-06	8.35859896511495e-06	9.45917829860012e-06	1.02390284793562e-05	9.27516222460088e-06	7.36279430579978e-06	1.0737592159788e-05	0.0709050998806582	0.910366084480244	0.193186876491452	unchanged	--	--	--	--	--	--	--	--	--	--	--	--	--	--	--	--
pos_1003	Testolactone	0.00026366640565466	0.000202893278554169	0.000180401894400444	0.000173868741781195	0.000181821552691564	0.000196281611761064	0.000208573667764698	0.000196480787650124	0.00020561505916938	0.000182802184655176	0.000190343364900372	0.000193710422490535	-0.0127359629832853	0.808438584275271	0.275507920321578	unchanged	--	--	LMST02020084	testolactone	3-oxo-13,17-secoandrosta-1,4-dieno-17,13alpha-lactone	(4aS,4bR,10aR,10bS,12aS)-10a,12a-dimethyl-3,4,4a,5,6,10a,10b,11,12,12a-decahydro-2H-naphtho[2,1-f]chromene-2,8(4bH)-dione; 1,2-didehydrotestololactone; 1-dehydrotestololactone; 13-hydroxy-3-oxo-13,17-secoandrosta-1,4-dien-17-oic acid delta-lactone; D-homo-17a-oxaandrosta-1,4-diene-3,17-dione; Delta(1)-testololactone; Teslac; Testolactone	Sterol Lipids [ST]	Steroids [ST02]	C19 steroids (androgens) and derivatives [ST0202]	--	--	--	--	--	--	--
pos_1004	DG(20:4(5Z,8Z,11Z,14Z)/22:5(4Z,7Z,10Z,13Z,16Z)/0:0)	0.000327490794697234	0.000315296315648543	0.000403287167075199	0.000205049280907728	0.000181584705302854	0.000259374678213042	0.00016032175080653	0.000265785271783621	0.00039475618961812	0.000193419478373732	0.000285777252556653	0.000411026873674963	-0.0122618446937022	0.954210174765367	0.0313354689541559	unchanged	--	--	--	--	--	--	--	--	--	HMDB0007525	Organic compounds	Lipids and lipid-like molecules	Glycerolipids	Diradylglycerols	53478305	_
pos_1005	Bovinic acid	7.27384813662508e-05	5.06632478351181e-05	4.66893124317539e-05	4.74674269697067e-05	3.34830463533819e-05	3.23635637828467e-05	3.76905549919153e-05	4.30996677093678e-05	3.10740657141884e-05	3.51713540738406e-05	3.54024016204916e-05	3.0586890091983e-05	-0.367122916178841	0.110677671657185	1.77091893420218	unchanged	C04056	Linoleic acid metabolism(ko00591)	LMFA01030118	Rumenic acid	9Z,11E-octadecadienoic acid	cis-9, trans-11-octadecadienoic acid; bovinic acid; C18:2n-7,9	Fatty Acyls [FA]	Fatty Acids and Conjugates [FA01]	Unsaturated fatty acids [FA0103]	HMDB0003797	Organic compounds	Lipids and lipid-like molecules	Fatty Acyls	Lineolic acids and derivatives	5280644	2540-56-9
pos_1006	(S)-2-Azetidinecarboxylic acid	1.72745918968914e-05	2.47177461398509e-05	2.27768189119798e-05	1.84247640538446e-05	1.53026882583098e-05	1.85653416621923e-05	1.68719669039963e-05	1.80124418692465e-05	2.20337767924986e-05	1.67980938319025e-05	1.85996129911411e-05	1.57316370359164e-05	-0.10487175503302	0.402342523952913	0.782440596081029	unchanged	--	--	--	--	--	--	--	--	--	--	--	--	--	--	--	--
pos_1007	PE(14:0/22:4(7Z,10Z,13Z,16Z))	0.000196979699388231	0.000200310234098613	0.000183365212790727	0.000165943433760962	0.000158517170678757	0.000190478596602469	0.000176210202172162	0.000180250520336071	0.000189487228029412	0.000175811633231088	0.000183338783203375	0.00017458366169039	-0.0163500055028258	0.72895906012317	0.254639218291007	unchanged	C00350	Kaposi sarcoma-associated herpesvirus infection(ko05167);;Glycerophospholipid metabolism(ko00564);;Autophagy - animal(ko04140);;Glycosylphosphatidylinositol (GPI)-anchor biosynthesis(ko00563);;Pathogenic Escherichia coli infection(ko05130);;Retrograde endocannabinoid signaling(ko04723);;Metabolic pathways(ko01100);;Autophagy - other(ko04136)	LMGP02010421	PE(14:0/22:4(7Z,10Z,13Z,16Z))	1-tetradecanoyl-2-(7Z,10Z,13Z,16Z-docosatetraenoyl)-glycero-3-phosphoethanolamine	PE(36:4); PE(14:0_22:4)	Glycerophospholipids [GP]	Glycerophosphoethanolamines [GP02]	Diacylglycerophosphoethanolamines [GP0201]	HMDB0008844	Organic compounds	Lipids and lipid-like molecules	Glycerophospholipids	Glycerophosphoethanolamines	52924126	_
pos_1008	Leonoside B	0.000142653956932748	8.72088866303195e-06	1.04118572430884e-05	9.10522179364048e-06	6.12985367675102e-05	5.08121153938634e-05	4.37900442346611e-05	2.23778429359536e-05	1.40803454408975e-05	2.79843707502444e-05	3.04005617349897e-05	2.04188469745136e-05	-0.102672713192423	0.381945708377864	1.03061334415449	unchanged	--	--	--	--	--	--	--	--	--	--	--	--	--	--	--	--
pos_1009	Desvenlafaxine	0.000130567132300891	6.53539738190708e-05	5.42750682991678e-05	5.12001162243997e-05	8.59789527535932e-05	8.35458509062857e-05	8.35168750835916e-05	7.33718251360655e-05	6.81885946387154e-05	6.42461891698447e-05	7.24074750376975e-05	6.30756837493085e-05	-0.0790542415098283	0.558071852880257	0.674206318493298	unchanged	--	--	--	--	--	--	--	--	--	HMDB0015646	Organic compounds	Organic oxygen compounds	Organooxygen compounds	Alcohols and polyols	125017	93413-62-8
pos_101	8Z,11Z,14Z-heptadecatrienal	0.000218844998153951	0.000283005428505909	0.000241268861184055	0.000259448116643435	0.000196857544018961	0.000235037786833169	0.000222024530905838	0.000227157492014482	0.000254989501805454	0.000237195932263134	0.000235600251803542	0.00023038271458957	-0.0192614993033846	0.742707957569603	0.240122888532951	unchanged	C16343	alpha-Linolenic acid metabolism(ko00592)	LMFA06000111	8Z,11Z,14Z-heptadecatrienal	8Z,11Z,14Z-heptadecatrienal	-	Fatty Acyls [FA]	Fatty aldehydes [FA06]	-	--	--	--	--	--	--	--
pos_1011	2-hydroxymexiletine	1.02634560807322e-05	1.56398481226908e-05	9.36898363307684e-06	1.24012646877024e-05	1.74441928975579e-05	1.17357847045627e-05	1.18026347276937e-05	1.11112141878373e-05	1.29025062641266e-05	1.32517570750664e-05	1.07573074468865e-05	1.34581563554048e-05	-0.0390162944362977	0.676979418193971	0.37949755031292	unchanged	--	--	--	--	--	--	--	--	--	--	--	--	--	--	--	--
pos_1012	Isoleucyl-Valine	0.000129268442310593	0.00014164509497671	0.000101915934954295	0.000105425743673157	0.00022160111000702	0.000116664968544212	0.000166848524208239	0.000153487108197949	0.000178843486427081	0.000132189139822453	0.000142588787132708	0.000143473454137317	0.214001312524271	0.41842888005553	0.84326347259496	unchanged	--	--	--	--	--	--	--	--	--	--	--	--	--	--	--	--
pos_1013	Milrinone	0.00023957760883478	0.000336998962200162	0.000224990212454456	0.000535031412238406	0.000300744223137582	0.000332302368057264	0.000187323065049999	0.000263334244137771	0.000622073540974261	0.000373149085909829	0.00036937799320492	0.000353661978446681	0.103828894111539	0.669365033655153	0.366966814875198	unchanged	--	--	--	--	--	--	--	--	--	--	--	--	--	--	--	--
pos_1014	MG(0:0/24:6(6Z,9Z,12Z,15Z,18Z,21Z)/0:0)	4.37299840012898e-06	1.12810205371654e-06	3.07986457919072e-06	1.84034817413664e-06	1.46172732824887e-07	0	2.04544548982886e-06	0	3.15696813997665e-06	0	8.62691129430312e-07	1.63600205982887e-06	-3.51865530696326	0.593369636758616	0.654299857245304	unchanged	--	--	--	--	--	--	--	--	--	--	--	--	--	--	--	--
pos_1015	1,5,5,8-Tetramethyl-12-thiabicyclo[9.1.0]dodeca-3,7-diene	6.60150270610574e-05	8.05127870043297e-05	0.000114183785426355	5.55116393512457e-05	6.81076963838517e-05	7.32266006934514e-05	4.87484712011346e-05	6.94523374467758e-05	5.94118478793743e-05	0.000117603899395477	7.8047810888355e-05	9.21345724874752e-05	0.00297023549954645	0.922276520054392	0.0475927289863742	unchanged	--	--	--	--	--	--	--	--	--	--	--	--	--	--	--	--
pos_1016	Monobenzone	1.70970709138999e-06	1.17544913988774e-06	3.00076340529876e-06	6.8328783204821e-07	2.10228488865334e-06	1.38518669456126e-06	4.56565857708574e-07	6.86109385224535e-07	5.26378196677087e-07	5.94116154509174e-06	1.70142465147202e-06	2.46511636008939e-06	-0.257695630683465	0.765073012223033	0.212280547600496	unchanged	--	--	--	--	--	--	--	--	--	--	--	--	--	--	--	--
pos_1017	PE(15:0/18:4(6Z,9Z,12Z,15Z))	0.000197631208990756	7.91304040780834e-05	0.000212285799860619	8.33473322646422e-05	7.70840802711044e-05	9.56980163979704e-05	8.39818671919653e-05	9.53021572679631e-05	7.5459557798376e-05	0.000130972154679974	9.46887785304565e-05	0.000115368586481174	-0.206685725470154	0.392888976960542	1.05356544251364	unchanged	--	--	LMGP02010461	PE(15:0/18:4(6Z,9Z,12Z,15Z))	1-pentadecanoyl-2-(6Z,9Z,12Z,15Z-octadecatetraenoyl)-glycero-3-phosphoethanolamine	PE(33:4); PE(15:0_18:4)	Glycerophospholipids [GP]	Glycerophosphoethanolamines [GP02]	Diacylglycerophosphoethanolamines [GP0201]	HMDB0008898	Organic compounds	Lipids and lipid-like molecules	Glycerophospholipids	Glycerophosphoethanolamines	52924165	_
pos_1018	PC(22:2(13Z,16Z)/22:5(7Z,10Z,13Z,16Z,19Z))	0.00011567053295177	7.20058131103287e-05	0.000100220916383672	7.37978102172504e-05	7.61088800513174e-05	7.99836207724934e-05	9.70593884024652e-05	9.76318945493499e-05	7.5373485159326e-05	9.85552802862361e-05	8.43031729508929e-05	9.70642213696361e-05	0.103202520257536	0.532276905097086	0.549538664217536	unchanged	C00157	Retrograde endocannabinoid signaling(ko04723);;Choline metabolism in cancer(ko05231);;alpha-Linolenic acid metabolism(ko00592);;Metabolic pathways(ko01100);;Glycerophospholipid metabolism(ko00564);;Linoleic acid metabolism(ko00591);;Arachidonic acid metabolism(ko00590)	--	--	--	--	--	--	--	HMDB0008615	Organic compounds	Lipids and lipid-like molecules	Glycerophospholipids	Glycerophosphocholines	53479237	_
pos_1019	20-Hydroxy-leukotriene B4	0.000147809485138006	0.000248899361063524	0.000180268402874634	0.000169850298601026	0.000177614021224948	0.000159383913203389	0.00017261692787171	0.000167745855211777	0.000206922018130803	0.000153561557838801	0.000140557428464811	0.000266592041189631	0.0187642622612234	0.868690819717028	0.328847668647829	unchanged	C04853	Arachidonic acid metabolism(ko00590)	--	--	--	--	--	--	--	--	--	--	--	--	--	--
pos_102	12-HYDROXY-4,4-BISNOR-4,8,11,13-PODOCARPATETRAEN-3-ONE	1.45481436537097e-05	1.82179286117428e-05	9.8759297569512e-05	0.000297473347623487	2.07959488898238e-05	5.43385413474046e-05	2.16957315160989e-05	9.58601595748861e-05	1.27949870047946e-05	1.76429735909797e-05	6.04980849726973e-05	0.000248155857441198	-0.0533330630949731	0.894016106191976	0.191408170609145	unchanged	--	--	--	--	--	--	--	--	--	--	--	--	--	--	--	--
pos_1020	Nitrendipine	0.000130515254435659	0.000136576528429339	9.86868794673674e-05	0.000124345562049056	0.00013974574587356	0.00013000532466692	9.67006130125323e-05	0.000102652883857016	0.000151865360049453	0.000119878110085546	0.000124409428177317	0.000118990999471144	-0.0951513076472335	0.465088047452542	0.803858432069796	unchanged	--	--	--	--	--	--	--	--	--	--	--	--	--	--	--	--
pos_1021	(gamma-Glutamyl-gamma-glutamyl)-S-methylcysteine	1.53826395984939e-08	7.19218356952668e-07	8.60569223439073e-07	4.53994841015798e-08	0	0	1.01712286311919e-06	1.71049665724877e-05	4.31136470232878e-08	8.60230561575565e-08	2.48656980276972e-06	1.21621895831902e-05	9.44634659063429	0.141503820201543	1.54756676729291	unchanged	--	--	--	--	--	--	--	--	--	--	--	--	--	--	--	--
pos_1022	Nicotinate D-ribonucleoside	7.88952842929272e-06	8.49016026475634e-06	6.5950092328667e-06	9.13162637975416e-06	4.12888314561963e-06	6.01474248247494e-06	5.6163545938856e-06	7.05735831314195e-06	5.58338101111197e-06	7.36721135427609e-06	8.4263373459177e-06	4.58247731302156e-06	-0.111696431677139	0.54012994503805	0.717013527008321	unchanged	C05841	Metabolic pathways(ko01100);;Nicotinate and nicotinamide metabolism(ko00760)	--	--	--	--	--	--	--	--	--	--	--	--	--	--
pos_1023	Cyclotricuspidogenin C	0.00188466527979725	0.00467659207960052	0.00213749646637568	0.00196588754562336	0.00367339361712428	0.00283756381021971	0.00197145856971725	0.00215727760089143	0.00236979627014512	0.00325414620279952	0.00251666725247531	0.00197994318704191	-0.206690704708308	0.359570036126209	0.846022919099115	unchanged	--	--	--	--	--	--	--	--	--	--	--	--	--	--	--	--
pos_1024	Glabric acid	7.95408355230361e-05	0.000136287085239189	0.000227185083441511	0.00014486077212907	0.000112209392958009	0.000132446524187877	0.000117745978646472	0.00019541351393701	9.39244518671275e-05	8.65885816035481e-05	0.000156795406691767	0.000912863528452739	0.3894594867521	0.400166237615245	0.955438038602461	unchanged	--	--	--	--	--	--	--	--	--	--	--	--	--	--	--	--
pos_1025	Deoxyadenosine	3.31712095827085e-05	4.24179239581275e-05	1.38459947583294e-05	3.37056786855578e-05	2.9779773344249e-05	2.05954725566098e-05	3.70986910070258e-05	2.35992230274572e-05	2.20521897609213e-05	5.35145271190117e-05	2.5964880660197e-05	2.08005372583303e-05	0.0784027524831483	0.816611455023339	0.256753400386449	unchanged	C00212	Purine metabolism(ko00230);;Metabolic pathways(ko01100);;Alcoholism(ko05034);;Parkinson disease(ko05012);;Regulation of lipolysis in adipocytes(ko04923);;Neuroactive ligand-receptor interaction(ko04080);;cGMP-PKG signaling pathway(ko04022);;Renin secretion(ko04924);;Sphingolipid signaling pathway(ko04071);;cAMP signaling pathway(ko04024);;ABC transporters(ko02010);;Morphine addiction(ko05032);;Va…	--	--	--	--	--	--	--	HMDB0000101	Organic compounds	Nucleosides, nucleotides, and analogues	Purine nucleosides	Purine 2'-deoxyribonucleosides	13730	958-09-8
pos_1026	DG(18:3(6Z,9Z,12Z)/20:3(5Z,8Z,11Z)/0:0)	1.26496819423674e-05	1.15753400944933e-05	7.29505368242742e-06	2.62656852047981e-06	3.19647613513613e-06	3.07482324843295e-06	0	0	4.76423958899552e-06	5.73888393949322e-06	5.65855175137993e-06	0	-12.3807069360844	0.10105052993142	1.69909473518052	unchanged	--	--	--	--	--	--	--	--	--	HMDB0007284	Organic compounds	Lipids and lipid-like molecules	Glycerolipids	Diradylglycerols	53478126	_
pos_1027	2-Oxoarginine	6.37607035005415e-06	6.3760944522566e-06	1.55219252327998e-05	1.35472748766896e-05	7.50157362108919e-06	1.0896199223601e-05	2.7518925262541e-06	1.56624226149819e-05	2.51956827626205e-06	1.54813399589345e-05	1.12406700387779e-05	2.56215701831606e-05	-0.0882025923551097	0.597133271168456	0.497196509059463	unchanged	C03771	Metabolic pathways(ko01100);;Arginine and proline metabolism(ko00330);;D-Arginine and D-ornithine metabolism(ko00472)	--	--	--	--	--	--	--	HMDB0004225	Organic compounds	Organic acids and derivatives	Keto acids and derivatives	Short-chain keto acids and derivatives	558	3715-10-4
pos_1028	2-(Methoxycarbonyl)-5-methyl-2,4-bis(3-methyl-2-butenyl)-6-(2-methyl-1-oxopropyl)-5-(4-methyl-3-pentenyl)cyclohexanone	0.000335925392619886	0.000491701782245311	0.000374344931054307	0.00035607055681734	0.000263913325159958	0.000387462016191042	0.000398309458896361	0.000402576667104042	0.000422899241487336	0.000297541943475914	0.0004149926375508	0.000301941756381162	0.0278902447438938	0.903012200351831	0.311766998431661	unchanged	--	--	--	--	--	--	--	--	--	--	--	--	--	--	--	--
pos_1029	9-Hydroxy-10-O-D-glucuronoside-12Z-octadecenoate	0.00170900231310066	0.000917489045291512	0.000883812339359156	0.000781236859343664	0.000973241299536761	0.00102815469571858	0.00107903433341381	0.000979933634195125	0.00100207129344455	0.000866043233923529	0.000960731683482896	0.000951781571227786	-0.0614311931259692	0.609077799517989	0.619175624951262	unchanged	--	--	--	--	--	--	--	--	--	--	--	--	--	--	--	--
pos_103	Arg Trp Leu His	0.000253641287489722	0.000627454603311231	0.000182075805204227	0.000236711438357549	0.000133778343427407	0.000299137794318512	0.000451983366397605	0.000205518026770613	0.000184075878059742	0.000222142348487212	0.000361691712134722	0.000135796396338343	-0.0928497877226988	0.749942953000472	0.0876630755960619	unchanged	--	--	--	--	--	--	--	--	--	--	--	--	--	--	--	--
pos_1030	2-Hydroxymyristic acid	1.50006194693166e-05	2.500343685475e-05	2.65159635352961e-05	2.11871145050238e-05	1.80390130283816e-05	2.21685974572231e-05	2.77348794845154e-05	2.70127601652787e-05	2.35002469005625e-05	2.1293966480851e-05	1.90571567842604e-05	2.0473473916051e-05	0.132619543690765	0.43358317853166	1.00480003835147	unchanged	--	--	LMFA01050484	2-Hydroxymyristic acid	2-hydroxytetradecanoic acid	-	Fatty Acyls [FA]	Fatty Acids and Conjugates [FA01]	Hydroxy fatty acids [FA0105]	--	--	--	--	--	--	--
pos_1032	Goyaglycoside c	0.00524062172752608	0.00594276153487909	0.00550554738381607	0.00553578266534895	0.00443961360598091	0.00503802144734157	0.00447256771631958	0.00500483915482376	0.00581930663581306	0.00471871350224968	0.00507980218488596	0.00470490906251234	-0.0885381885810981	0.29221497615488	1.08902798978214	unchanged	--	--	--	--	--	--	--	--	--	--	--	--	--	--	--	--
pos_1033	Xanthomicrol	1.79760620797199e-05	2.57784588767777e-05	8.79106904868518e-06	1.43953389558529e-05	2.01152618894345e-05	1.6737677783045e-05	1.48698217802675e-05	1.38021768939549e-05	4.30252896156245e-05	2.1526083522143e-05	2.46666195805544e-05	2.02892492084095e-05	0.378080705211387	0.278914158337359	1.11791716974262	unchanged	--	--	LMPK12111447	Xanthomicrol	-	-	Polyketides [PK]	Flavonoids [PK12]	Flavones and Flavonols [PK1211]	--	--	--	--	--	--	--
pos_1034	Annoglaxin	0.00089693260787426	0.00125388733205447	0.000678267918230677	0.00164604650860901	0.000735088087412063	0.0010463553227684	0.0011729876330823	0.000893781010032995	0.000715083172958179	0.00103939153409306	0.00088023195271656	0.000695585388653633	-0.169569152615276	0.415414521340808	0.764648446793077	unchanged	--	--	--	--	--	--	--	--	--	--	--	--	--	--	--	--
pos_1035	Methoxybrassinin	3.29815537642633e-05	1.42698449329147e-05	1.58153663943261e-05	2.00484653632003e-05	1.94747890727391e-05	2.05420892883088e-05	1.93886947255518e-05	1.88863075543529e-05	2.33390471447748e-05	2.01661658879195e-05	2.04420209543451e-05	2.05203808470549e-05	0.0460326221951917	0.982108103996122	0.19565826734913	unchanged	--	--	--	--	--	--	--	--	--	--	--	--	--	--	--	--
pos_1036	Amdinocillin	4.04685467791073e-05	3.31040638736945e-05	1.04396121130422e-05	2.75704117629626e-05	2.94162813958151e-05	2.46818120341552e-05	1.98238493376738e-05	1.38018582876664e-05	1.92815349281629e-05	3.72522925387449e-05	2.12441891596672e-05	1.46318229130821e-05	-0.3660391546436	0.246904197024898	1.23877204062663	unchanged	--	--	--	--	--	--	--	--	--	HMDB0015294	Organic compounds	Organic acids and derivatives	Carboxylic acids and derivatives	Amino acids, peptides, and analogues	36273	32887-01-7
pos_1037	(1(10)E,4E,6a,9b)-9-(2-Methylbutanoyloxy)-1(10),4,11(13)-germacratrien-12,6-olide	6.11900843656508e-05	7.11896943135269e-05	1.87811708489621e-05	2.60670889239992e-05	3.24662978750877e-05	4.07943492282159e-05	3.16565850810706e-05	2.42514713152644e-05	1.90325913036559e-05	3.00379859576685e-05	2.41745936623587e-05	1.68941038980148e-05	-0.662990920624196	0.0941977430398701	1.62602742843126	unchanged	--	--	--	--	--	--	--	--	--	--	--	--	--	--	--	--
pos_1038	Tacrolimus	0.000270981688950648	8.45945156076044e-05	7.4616203637102e-05	6.45977245453701e-05	0.000158932039942592	0.000159941548848687	0.000147291553558647	0.00012309667651938	9.83127705511557e-05	0.000110439929644604	0.000119619409770769	0.000109928612167097	-0.0196174527840522	0.614500234631909	0.593644102870389	unchanged	--	--	LMPK04000003	Tacrolimus	-	-	Polyketides [PK]	Macrolides and lactone polyketides [PK04]	-	--	--	--	--	--	--	--
pos_104	Cyperotundone	0.000275545001922607	0.000297481899373465	0.000289622048872899	0.000274233222757969	0.000241125578671086	0.000264612452363184	0.000252826717742442	0.000272586432439615	0.000251636125132692	0.000281984393654512	0.00026428928610927	0.000275326482903984	-0.0372086530394888	0.463738772463304	0.745195418796609	unchanged	--	--	--	--	--	--	--	--	--	--	--	--	--	--	--	--
pos_1040	Soyasapogenol B 3-O-b-D-glucuronide	7.83874230516209e-06	1.32057949160496e-05	6.49935365262856e-06	1.27859033210459e-05	1.08304882609944e-05	1.40586535633724e-05	1.09252006312268e-05	1.09920550458089e-05	9.93422330866367e-06	1.25904643474031e-05	1.49470807513284e-05	9.4973341927714e-06	0.117174256834375	0.69405860687509	0.543990104564763	unchanged	--	--	--	--	--	--	--	--	--	--	--	--	--	--	--	--
pos_1041	TG(22:0/14:1(9Z)/20:5(5Z,8Z,11Z,14Z,17Z))	3.05907624428032e-05	3.39704411351982e-05	0.000119758349790108	8.37984759495923e-05	4.15285105715499e-05	6.2424667479201e-05	0.000138254864072635	0.000107731696437159	2.33067561681828e-05	7.16130463190421e-05	8.54059145037519e-05	6.47272241650251e-05	0.390955959698916	0.37552382495357	0.973981043543359	unchanged	--	--	--	--	--	--	--	--	--	HMDB0046452	Organic compounds	Lipids and lipid-like molecules	Glycerolipids	Triradylcglycerols	131757375	_
pos_1042	E,e-Carotene-3,3'-dione	2.38073706366802e-05	3.15346324626208e-05	1.90178501652335e-05	3.51624289122003e-05	2.87970028442047e-05	3.53810185779563e-05	3.48927632532693e-05	3.19153538720688e-05	3.1830993998298e-05	2.6364737581942e-05	3.51468647677599e-05	2.47076748620908e-05	0.110991172709097	0.575403503265241	0.739077110036483	unchanged	--	--	--	--	--	--	--	--	--	--	--	--	--	--	--	--
pos_1043	L-2-Amino-3-methylenehexanoic acid	1.49528463334129e-05	1.85454321130782e-05	1.83700704777963e-05	2.11531297895208e-05	1.56724643899687e-05	1.6882398136324e-05	1.79207832897366e-05	1.82507549532422e-05	1.75349572122101e-05	1.94224810346297e-05	1.72505345870155e-05	1.97517120085228e-05	0.0687843015918226	0.476409767176524	0.789594437878468	unchanged	--	--	--	--	--	--	--	--	--	--	--	--	--	--	--	--
pos_1044	L-Leucine	1.16750803603863e-05	1.74041849493857e-05	1.58470883845763e-05	1.55457499249035e-05	1.43621862859223e-05	1.49516045430557e-05	1.25936573676898e-05	1.34719762888928e-05	1.77897620811349e-05	1.51711960971822e-05	1.62705380741971e-05	1.71135078766226e-05	0.0410429844802103	0.710351556131773	0.45172560456245	unchanged	C00123	Central carbon metabolism in cancer(ko05230);;Shigellosis(ko05131);;mTOR signaling pathway(ko04150);;Biosynthesis of amino acids(ko01230);;Protein digestion and absorption(ko04974);;Metabolic pathways(ko01100);;2-Oxocarboxylic acid metabolism(ko01210);;Valine, leucine and isoleucine degradation(ko00280);;ABC transporters(ko02010);;Aminoacyl-tRNA biosynthesis(ko00970);;Mineral absorption(ko04978);…	--	--	--	--	--	--	--	--	--	--	--	--	--	--
pos_1045	Isolimonic acid	7.3054960651191e-05	1.50242949698664e-06	1.44831518902254e-07	2.23022790559257e-07	8.75992347225844e-07	5.99732268142455e-07	5.86106733992646e-07	1.11809097899302e-06	3.9710502329982e-07	1.37294654883651e-06	7.36162590950042e-07	1.56562794991941e-07	-0.916541385872275	0.365450204084691	1.11738493071021	unchanged	--	--	--	--	--	--	--	--	--	--	--	--	--	--	--	--
pos_1046	Lucyoside R	0.000121914279679639	4.34258375184982e-05	4.01999203982618e-05	3.55609604720819e-05	7.8805713351428e-05	7.54037427049922e-05	7.84818249263588e-05	6.10434689114453e-05	5.52443279306352e-05	5.80299527459421e-05	5.95030908565949e-05	6.15957869410449e-05	0.0539739570563658	0.806911410709476	0.303885824085606	unchanged	--	--	--	--	--	--	--	--	--	HMDB0032836	Organic compounds	Lipids and lipid-like molecules	Prenol lipids	Terpene glycosides	73745597	206270-86-2
pos_1047	N-Lactoyl ethanolamine	0.000106684095280591	0.000111323525618239	8.69121051277265e-05	8.85622266420574e-05	0.000131990404978723	8.32228439425084e-05	0.000109674911445925	0.000191055941835352	0.000101551963976015	9.55689418410067e-05	8.65152051064008e-05	0.000131786455720573	0.201217945988933	0.337219081989112	0.957696482357368	unchanged	--	--	--	--	--	--	--	--	--	--	--	--	--	--	--	--
pos_1048	L-Threonine	4.05166412149602e-06	4.95019749289224e-06	4.48707564812494e-06	4.10440011067578e-06	4.11317627433434e-06	4.63741768143139e-06	4.56469262162905e-06	4.25400835658093e-06	4.97641098872676e-06	3.85511733014764e-06	4.4420061594083e-06	9.490464280209e-06	0.192731487907444	0.359830188525408	1.08848459715454	unchanged	C00188	Glycine, serine and threonine metabolism(ko00260);;Valine, leucine and isoleucine biosynthesis(ko00290);;Mineral absorption(ko04978);;ABC transporters(ko02010);;Porphyrin and chlorophyll metabolism(ko00860);;Aminoacyl-tRNA biosynthesis(ko00970);;Protein digestion and absorption(ko04974);;Metabolic pathways(ko01100);;Biosynthesis of amino acids(ko01230);;Monobactam biosynthesis(ko00261)	--	--	--	--	--	--	--	--	--	--	--	--	--	--
pos_1049	Lubiminol	0.000134791036243688	0.000132298128344631	0.000126502125239268	0.000163141350875234	0.000157904095739051	0.000144757964596	0.000156027234307739	0.000147799865177536	0.00014058914522196	0.000149419229044028	0.000147110862476837	0.000155817190723342	0.0667598979139772	0.369883570310623	0.93374805781472	unchanged	--	--	--	--	--	--	--	--	--	--	--	--	--	--	--	--
pos_1050	Brassinolide	3.05413245354179e-06	4.78830947158439e-06	2.94779821333209e-05	6.5600688612823e-06	1.56123685783382e-06	6.89497571708909e-06	2.98166526330824e-05	2.67377848591743e-05	5.1795548620942e-06	1.08121866553027e-05	2.11903416894288e-05	2.50637559369956e-05	1.60089064826928	0.0854964369354941	1.74128152983545	unchanged	C08814	Metabolic pathways(ko01100)	LMST01140001	Brassinolide	2alpha,3alpha,22R,23R-tetrahydroxy-6,7-seco-5-campestano-6,7-lactone	2alpha-3alpha,22R,23R-tetrahydroxy-24-methyl-6,7-s-5alpha-cholestano-6,7-lactone	Sterol Lipids [ST]	Sterols [ST01]	Brassinolides and derivatives [ST0114]	HMDB0041130	Organic compounds	Lipids and lipid-like molecules	Steroids and steroid derivatives	Steroid lactones	3239	78821-43-9
pos_1051	Netilmicin	7.235472780647e-06	1.77661218021961e-06	8.51425814103647e-07	3.82347619266298e-06	2.82432922456346e-06	3.92245308759846e-06	2.73199173761384e-06	1.89644771330146e-06	3.61854362311447e-06	2.71007949489542e-06	3.99634273557305e-06	4.00040334133602e-06	0.13485077837068	0.807197286280727	0.365305160394808	unchanged	--	--	--	--	--	--	--	--	--	--	--	--	--	--	--	--
pos_1053	DG(18:0e/2:0/0:0)	0.000377622751092367	0.00024374083359807	0.000221812722810056	0.000426373391695709	0.000491933272263962	0.000367733956907418	0.000483518032929507	0.000363545410655954	0.000168644014344577	0.000330362429322766	0.000311991908719469	0.000168908051351534	-0.268232580827629	0.458339052079444	0.785280084794113	unchanged	--	--	--	--	--	--	--	--	--	--	--	--	--	--	--	--
pos_1054	Farnesylcysteine	5.69997995278618e-05	7.47177204875475e-05	0.000124096641775704	4.26122010928391e-05	4.04167306961233e-05	6.02313836532509e-05	3.84132371728819e-05	6.47861547949556e-05	8.04637621646833e-05	7.60027141821194e-05	6.4313804244299e-05	9.6351813876898e-05	0.130430902085035	0.817760291299842	0.223561736689503	unchanged	C19691	Terpenoid backbone biosynthesis(ko00900)	--	--	--	--	--	--	--	--	--	--	--	--	--	--
pos_1055	7alpha,12alpha,26-trihydroxycholest-4-en-3-one	0.000264842635770179	0.00029094232585622	0.000194010216677286	0.000306926742897239	0.000177412652330676	0.00024319723052925	0.000183618251754766	0.000182325865224609	0.000203820898416213	0.000308720350218827	0.000216376193362925	0.00016395292846032	-0.234246090326783	0.251889892395113	1.19542916950623	unchanged	--	--	LMST04030158	7alpha,12alpha,26-trihydroxycholest-4-en-3-one	7alpha,12alpha,26-trihydroxycholest-4-en-3-one	4-cholesten-7alpha,12alpha,26-triol-3-one	Sterol Lipids [ST]	Bile acids and derivatives [ST04]	C27 bile acids, alcohols, and derivatives [ST0403]	--	--	--	--	--	--	--
pos_1056	4-(Methylthio)-2-butanol	4.11006374474745e-06	5.877128266319e-06	7.27122116521195e-06	5.90479668295649e-06	4.73002107837413e-06	5.06780022314919e-06	3.8921768737568e-06	5.4961929984789e-06	4.87142827350352e-06	4.77756741257408e-06	5.32383788010287e-06	6.96429706786519e-06	-0.0715813514092964	0.667340100538702	0.454324777319776	unchanged	--	--	--	--	--	--	--	--	--	--	--	--	--	--	--	--
pos_1057	Temocapril	3.57113202529351e-05	5.39616406115212e-06	7.21233539976199e-06	6.76813108145168e-06	1.96802930785152e-05	1.94792209586903e-05	1.85416559759462e-05	1.28829022980987e-05	1.09811893421723e-05	1.29074839303804e-05	1.34559738238059e-05	1.2214719856032e-05	0.104315726512997	0.6696516682894	0.527709316036458	unchanged	--	--	--	--	--	--	--	--	--	--	--	--	--	--	--	--
pos_1058	4,5-Dihydro-1-benzoxepin-3(2H)-one	2.11209365741551e-05	2.76998133988738e-05	0.000133949541380594	4.82801954081291e-05	2.78623617172906e-05	5.77249699886979e-05	9.95615975779274e-05	7.90604604235603e-05	2.48689226720371e-05	2.86097329984861e-05	6.16331586940204e-05	8.01655579499623e-05	0.364162109922168	0.662338716322041	0.545340179736251	unchanged	--	--	--	--	--	--	--	--	--	--	--	--	--	--	--	--
pos_1059	5-Carboxy-2'-deoxyuridine	1.62461122593232e-05	1.99073918968174e-05	1.89028051723122e-05	1.71402719856131e-05	1.45490464524617e-05	1.32522915911089e-05	1.48491285281678e-05	1.52688977357164e-05	1.76978895363328e-05	1.4463700509179e-05	1.67018873117699e-05	1.74435485424086e-05	-0.042810438196403	0.627509078654579	0.525848793495047	unchanged	--	--	--	--	--	--	--	--	--	--	--	--	--	--	--	--
pos_106	(+)-4-Isocedren-15-al	0.000141830648301967	0.000159877513935321	0.000249258399322105	0.000237653388025998	0.000251985950295482	0.000221803645428043	0.000208170969335697	0.000215631634365546	0.000235570024572302	0.000212218618308592	0.000219245484744823	0.000260934290521194	0.129002465337066	0.503824723285885	0.669710903321384	unchanged	--	--	LMPR0103690004	(+)-4-Isocedren-15-al	-	-	Prenol Lipids [PR]	Isoprenoids [PR01]	C15 isoprenoids (sesquiterpenes) [PR0103]	--	--	--	--	--	--	--
pos_1060	Sinapoylspermine	2.43199929846309e-05	1.25084416238952e-05	5.9454356726755e-05	5.604195120563e-06	7.00954897594608e-06	1.92277791159387e-05	1.51226318597512e-05	4.60217290882986e-05	5.94550073521482e-05	2.2454193507884e-05	4.47825968234503e-05	9.91541774393212e-05	1.37307120692024	0.106528728251247	1.57067022312663	unchanged	--	--	--	--	--	--	--	--	--	--	--	--	--	--	--	--
pos_1061	Sarcodon scabrosus Depsipeptide	1.31911265762948e-05	1.81224268231802e-05	9.86619563924405e-06	1.28268848210931e-05	1.13772257807579e-05	1.15977214567806e-05	1.30896540438401e-05	9.18338762931178e-06	7.58244055129016e-06	2.59216216750135e-05	1.12505769763983e-05	7.27046661870651e-06	-0.174422742515482	0.888960959056497	0.135115792406987	unchanged	--	--	--	--	--	--	--	--	--	--	--	--	--	--	--	--
pos_1062	Annosquamosin B	1.98937896620918e-05	6.35303672962545e-05	2.97379404502007e-05	1.70416470523192e-05	2.45591872657214e-05	3.27378501633593e-05	1.33273430374733e-05	2.62779653633443e-05	1.49999959088291e-05	5.77467472167914e-05	3.15043265688175e-05	4.89034882978643e-05	-0.0233207496909404	0.932354159567896	0.195406168145549	unchanged	--	--	--	--	--	--	--	--	--	HMDB0031379	Organic compounds	Lipids and lipid-like molecules	Prenol lipids	Diterpenoids	51136563	177742-56-2
pos_1064	Bupivacaine	5.58127523046011e-05	6.22016430072608e-05	5.66910247113692e-05	6.65220547301747e-05	6.27387756747094e-05	6.17502116698422e-05	6.62956306499126e-05	6.19526557237452e-05	5.46312564693785e-05	6.14406928879402e-05	5.93551273347659e-05	5.32608118475179e-05	-0.0364756547052174	0.583434462552711	0.471303454633719	unchanged	--	--	--	--	--	--	--	--	--	--	--	--	--	--	--	--
pos_1065	alpha-Ionol O-[arabinosyl-(1->6)-glucoside]	0.000476443568174675	0.000528862192049414	0.000607797587199994	0.000444095255899901	0.000373715309317348	0.000417532075406124	0.000700744682964467	0.000626208795270372	0.000385047212255852	0.000595971791728165	0.000594726250361319	0.000337702726877087	0.155051275912708	0.365874055184359	0.981650790521016	unchanged	--	--	--	--	--	--	--	--	--	--	--	--	--	--	--	--
pos_1066	cis-Uvariamicin IB	0.000809367854853137	0.000796504721403142	0.000687937341581874	0.000513703242652272	0.00039336653218025	0.000581272001597639	0.000425968546430929	0.00100028256204726	0.000763608961560663	0.000692555379911259	0.00105314800324955	0.00126448301628163	0.421029944290002	0.129061787853309	1.48894633116267	unchanged	--	--	--	--	--	--	--	--	--	--	--	--	--	--	--	--
pos_1067	PE(22:0/24:1(15Z))	0.000226223369723558	0.000147065998330439	0.000147966099856976	0.000136042311992654	0.000132917657056432	0.000126000240511002	0.000148426391208315	0.000125265946560295	0.00013004756865257	0.000119848894970489	0.000121700280385796	0.000123066284109277	-0.228287845216444	0.169286772308867	1.52910242492397	unchanged	--	--	LMGP02010292	PE(22:0/24:1(15Z))	1-docosanoyl-2-(15Z-tetracosenoyl)-sn-glycero-3-phosphoethanolamine	15-Tetracosenoic acid, 1-[[[(2-aminoethoxy)hydroxyphosphinyl]oxy]methyl]-2-[(1-oxodocosyl)oxy]ethyl ester, [R-(Z)]- (9CI); PE(22:0/24:1); PE(46:1); PE(22:0_24:1)	Glycerophospholipids [GP]	Glycerophosphoethanolamines [GP02]	Diacylglycerophosphoethanolamines [GP0201]	HMDB0009509	Organic compounds	Lipids and lipid-like molecules	Glycerophospholipids	Glycerophosphoethanolamines	9546991	_
pos_1068	Soyacerebroside I	0.000256315408306972	0.000467384706124616	0.000352274144028354	0.000303270718411685	0.000422923136947403	0.000337327107287331	0.000462868662184941	0.000431787108479591	0.000283156459695236	0.000274574382880544	0.000344745062895244	0.000349958961317058	0.0063426500676016	0.97782775444831	0.243399440230128	unchanged	--	--	--	--	--	--	--	--	--	--	--	--	--	--	--	--
pos_1069	Octadecyl cis-p-coumarate	0.00019012631339607	0.000189073327747081	0.000152261376143215	0.000181194660253643	0.000249811358353206	0.000187231039857354	0.000215401552400508	0.000199900093824618	0.000199708711226894	0.000188691673855588	0.000185905942233582	0.000152314984363187	-0.00229777552439003	0.935874660260567	0.0965995521985609	unchanged	--	--	--	--	--	--	--	--	--	--	--	--	--	--	--	--
pos_107	Isomonospermoside	0.000151490010039457	0.000211260915116656	7.16071816742406e-05	0.000103305386915879	0.000102466999656699	0.000134213918630688	0.000260406503380859	0.000137893598976338	5.18515099828944e-05	0.000169091399700766	0.00013715045572474	4.37213602160968e-05	-0.131047016706562	0.913465565883833	0.294648188927683	unchanged	--	--	LMPK12140066	Isomonospermoside	-	-	Polyketides [PK]	Flavonoids [PK12]	Flavanones [PK1214]	--	--	--	--	--	--	--
pos_1070	(R)-N-Methylsalsolinol	2.02453616612103e-05	2.1700550838048e-05	3.6253236876486e-05	3.91436800305081e-05	2.6621985381773e-05	2.7631231371766e-05	2.48250639533082e-05	2.64392643339594e-05	2.19882767187633e-05	2.20846782323623e-05	2.44250796653759e-05	3.19122158939323e-05	-0.14739973844873	0.368508096765425	0.980221288519488	unchanged	--	--	--	--	--	--	--	--	--	--	--	--	--	--	--	--
pos_1071	(9E)-10-nitrooctadecenoic Acid	5.90089593573648e-05	6.82108549705032e-05	6.36604820308705e-05	7.07145080791977e-05	6.57869459843519e-05	7.14883622091864e-05	6.99545191003274e-05	7.86101463131096e-05	6.90957967183923e-05	6.67823083039699e-05	7.53861434366368e-05	7.1814292664596e-05	0.114819609542256	0.0634772297111818	1.88148769034255	unchanged	--	--	--	--	--	--	--	--	--	--	--	--	--	--	--	--
pos_1072	2-Acetyl-3-ethylpyrazine	5.99389371988428e-05	5.50165872452064e-05	3.65361556875447e-05	4.03444460976603e-05	5.57250026429055e-05	4.85752372912038e-05	5.07791397237571e-05	4.9708740440557e-05	4.67247793521062e-05	5.13802913241004e-05	5.21211222822574e-05	6.22919185682759e-05	0.096741779561901	0.537590706244331	0.686308400149801	unchanged	--	--	--	--	--	--	--	--	--	--	--	--	--	--	--	--
pos_1073	Neolinustatin	5.96503890331222e-06	9.85186204859414e-06	6.88259674573533e-06	7.88622271234797e-06	8.65184137415296e-06	8.04562355504655e-06	1.11270187582944e-05	9.08477593083803e-06	1.27405048068724e-05	8.4786020981128e-06	9.8469071217803e-06	1.46742998177055e-05	0.471514439782077	0.0233300137844173	2.28950696821559	up	--	--	--	--	--	--	--	--	--	--	--	--	--	--	--	--
pos_1074	1-Phenyl-1,3-eicosanedione	7.41246626883363e-05	6.30209587896793e-05	7.6604573052796e-05	9.55346294869445e-05	0.000112836711365787	8.50015428757227e-05	0.000141975325089897	0.000100832009255239	8.57165103864387e-05	8.12473920405083e-05	0.000103822166707404	8.53410898646764e-05	0.238289095602598	0.221701577831791	1.29198753876749	unchanged	--	--	--	--	--	--	--	--	--	--	--	--	--	--	--	--
pos_1075	14,15-EpETE	3.42658009668608e-05	3.61829149192699e-05	2.93476991371288e-05	3.76211291157617e-05	3.31849553628311e-05	3.73866626978872e-05	3.73073499524725e-05	3.36160818731272e-05	4.0337761902668e-05	3.90011510949411e-05	3.74717070930615e-05	3.22958507905294e-05	0.0819146858340112	0.291607509929542	1.14220613850267	unchanged	--	--	--	--	--	--	--	--	--	--	--	--	--	--	--	--
pos_1077	Flavoxanthin	0.0100772326560888	0.0136151297478074	0.00987668440453529	0.0118528972552607	0.00796542522667326	0.0120770241814317	0.0122096116136428	0.0114217718921549	0.00888232041948897	0.010560858486968	0.0121256103539167	0.00761184382388798	-0.0593037241870302	0.700412085912162	0.228652985461928	unchanged	--	--	LMPR01070271	Flavoxanthin	-	-	Prenol Lipids [PR]	Isoprenoids [PR01]	C40 isoprenoids (tetraterpenes) [PR0107]	--	--	--	--	--	--	--
pos_1078	Vinaginsenoside R14	0.000429671630750674	0.000170526039036574	0.000110252243989198	8.59901306632165e-05	0.00022735378676196	0.000218982469080407	0.000195742395904942	0.000167556552895359	0.000130972138286168	0.000153978294013791	0.000157237068157553	0.000142924880564021	-0.203040374019409	0.377463600327835	0.993727444607319	unchanged	--	--	--	--	--	--	--	--	--	--	--	--	--	--	--	--
pos_1079	Cer(d18:1/14:0)	3.07946144923707e-05	4.01110645253076e-05	4.33888662074285e-05	4.47438196116195e-05	3.4857537630565e-05	4.21815937718274e-05	4.60028511024693e-05	4.13993081395398e-05	4.13122601478002e-05	4.44303844599318e-05	4.33327653199249e-05	3.95087610353954e-05	0.127216927844682	0.213376108966225	1.42764870113106	unchanged	--	--	LMSP02010001	Cer(d18:1/14:0)	N-(tetradecanoyl)-sphing-4-enine	C14 Cer; N-(tetradecanoyl)-ceramide; N-(myristoyl)-ceramide; Cer[NS]	Sphingolipids [SP]	Ceramides [SP02]	N-acylsphingosines (ceramides) [SP0201]	--	--	--	--	--	--	--
pos_108	RHOIFOLIN	3.78775372116092e-06	1.82688113090293e-05	3.57014084103671e-05	2.0370241796344e-06	9.23534477713109e-06	1.09351704987591e-05	8.49582130333884e-05	6.2976908725647e-05	1.71236608976507e-05	3.84908284112322e-05	4.17430306845687e-05	7.69590820373692e-05	2.40736375921449	0.0100836609418814	2.51792413422118	up	--	--	--	--	--	--	--	--	--	--	--	--	--	--	--	--
pos_1080	MG(0:0/15:0/0:0)	0.000205671062942439	0.000151397921924067	0.000248769758624607	0.000111950576707639	9.64819907105611e-05	0.000144366584022575	8.46359258154754e-05	0.000145253670917212	0.000238935285218082	9.45524965266186e-05	0.000158444785084034	0.000427374927766811	0.106463467850341	0.596889344457382	0.550346125980098	unchanged	--	--	--	--	--	--	--	--	--	--	--	--	--	--	--	--
pos_1081	Trifluridine	1.38639346664249e-05	3.46024532309961e-06	6.79214281852925e-06	5.29873849732072e-05	0	1.53633845157463e-05	0	2.28186124481502e-06	1.03863726550481e-06	5.56081043657279e-07	1.90508204404573e-06	6.24506821834786e-06	-2.34102778046538	0.150824374806806	1.59849859749324	unchanged	--	--	--	--	--	--	--	--	--	--	--	--	--	--	--	--
pos_1082	Austalide J	7.72436681914082e-06	5.77212411042449e-06	5.1208646200273e-06	4.68771791326203e-06	4.79907987979426e-06	6.06185117303307e-06	5.61928116122186e-06	5.80946092072386e-06	5.02492358592258e-06	5.35646762911605e-06	4.77932757289988e-06	6.16523289543051e-06	-0.0443619880270454	0.656900210296716	0.437118356801925	unchanged	--	--	--	--	--	--	--	--	--	--	--	--	--	--	--	--
pos_1083	Pitheduloside I	0.00235551463032745	0.00341165809646247	0.00505944210863012	0.00373293426472837	0.00232697166691747	0.00338554841617111	0.00381583706193539	0.00464236761803373	0.00417403503272438	0.00315293510489168	0.00442686937113818	0.00583910517955017	0.388897608347632	0.112358415586379	1.61669574783859	unchanged	--	--	--	--	--	--	--	--	--	--	--	--	--	--	--	--
pos_1084	Annuolide B	9.57631855856293e-06	1.39749129746319e-05	1.34336529147653e-05	2.30985608998526e-05	1.50685926124131e-05	1.57294189659119e-05	1.54944063392194e-05	1.46292748731029e-05	1.18354641529786e-05	1.28126796351198e-05	1.53153596341487e-05	1.84003657502491e-05	-0.00383984829717221	0.850446175610155	0.144693003926503	unchanged	--	--	--	--	--	--	--	--	--	--	--	--	--	--	--	--
pos_1085	Arginyl-Proline	2.43903308982333e-05	3.60239900448318e-05	2.52747472328279e-05	2.83507358472855e-05	3.19221103502873e-05	2.87378333398314e-05	2.60012524182189e-05	3.02066046488444e-05	2.98336580654547e-05	3.38894340348599e-05	2.99671702921087e-05	2.81945111423615e-05	0.0360268794296168	0.790439566308116	0.340147001543317	unchanged	--	--	--	--	--	--	--	--	--	HMDB0028717	Organic compounds	Organic acids and derivatives	Carboxylic acids and derivatives	Amino acids, peptides, and analogues	151003	2418-69-1
pos_1086	triazolopropionic acid	3.96353834726837e-06	6.71277070187676e-06	9.41857263518503e-06	6.81694841920746e-06	5.03068245011862e-06	6.38822379027588e-06	7.92841909838451e-06	6.08353300441985e-06	1.12923341496878e-05	4.23585775414029e-06	8.53512893355488e-06	5.14692809809177e-06	0.147415398558529	0.545267858255013	0.687140220489646	unchanged	--	--	--	--	--	--	--	--	--	--	--	--	--	--	--	--
pos_1087	Galactosylglycerol	7.80644405300538e-05	0.000135269494208746	6.26963342866832e-05	8.5621692013966e-05	0.000115878860875204	8.98401119649737e-05	6.88038660247903e-05	6.76347063075463e-05	0.000125382611155969	0.000105747463116877	8.95006734654301e-05	7.68204472448298e-05	-0.0793723354359326	0.704351593411071	0.357013481196316	unchanged	C05401	Glycerolipid metabolism(ko00561);;Galactose metabolism(ko00052)	--	--	--	--	--	--	--	--	--	--	--	--	--	--
pos_1088	19-hydroxyprostaglandin H2(1-)	2.26265739660345e-06	3.96131447372995e-06	4.46835936187634e-06	1.2541344308847e-06	4.29698679763036e-06	3.07362252810833e-06	8.26785297774938e-06	4.92944987623281e-06	1.85808221680399e-06	2.76221726519672e-06	4.16349399814787e-06	4.02361528007517e-06	0.400194614996604	0.316471535782086	1.22810461358134	unchanged	--	--	--	--	--	--	--	--	--	--	--	--	--	--	--	--
pos_1089	Glaucarubolone 15-O-beta-D-glucopyranoside	7.65698855760424e-06	1.41900294702073e-05	1.36305416207823e-06	4.39290733422478e-06	5.40339946003512e-06	3.63996885034775e-06	2.67242603534655e-06	1.67494870400126e-06	2.12659001542272e-06	5.94840317309045e-06	3.07367748450785e-06	5.86217773241514e-05	-0.0544588827807395	0.535983265587954	0.735198564657887	unchanged	--	--	--	--	--	--	--	--	--	--	--	--	--	--	--	--
pos_109	Acetylenic acids; 10,16-Heptadecadien-8-ynoic acid, (E)-	5.76642073329297e-05	5.66529643482266e-05	0.000119815665977017	0.000107651681836772	0.000138369539419973	0.000103935077167936	9.02499663551588e-05	9.48566256793469e-05	0.000119014444993059	9.59629377293781e-05	0.000102414351168837	9.85139171833944e-05	0.117159037647037	0.849535811684041	0.104748385434973	unchanged	--	--	--	--	--	--	--	--	--	--	--	--	--	--	--	--
pos_1090	(R)-Heraclenol 2'-(3-methylbutanoate)	3.89749162081281e-05	3.92726282854609e-05	1.63605619778763e-05	3.2591341187647e-05	3.34692201431646e-05	3.0735537792979e-05	3.12949710646439e-05	2.37348248760016e-05	1.92021975567236e-05	3.95544524420193e-05	2.8264547677999e-05	2.44610562191136e-05	-0.184332613506262	0.376886072885468	0.880590508982907	unchanged	--	--	--	--	--	--	--	--	--	--	--	--	--	--	--	--
pos_1091	(E,E)-2,4-Hexadienal	1.75696915153705e-05	3.14949645694637e-05	1.64544514059761e-05	1.91109690762449e-05	2.63300397983134e-05	2.13289794650217e-05	2.24351982186845e-05	1.93717138763694e-05	1.92186147174324e-05	2.56613483427326e-05	2.01477374306232e-05	1.8223637975959e-05	-0.0520613115424258	0.659227556050399	0.311196201949849	unchanged	--	--	--	--	--	--	--	--	--	--	--	--	--	--	--	--
pos_1092	Octreotide	7.14977686995547e-06	9.30338242779698e-06	1.62827032372552e-07	3.14979490949438e-07	5.61791181903807e-06	5.3263695338409e-06	1.69221391984726e-05	4.3660220099043e-06	1.1421920744868e-05	1.42980946645792e-07	9.73857669869703e-06	1.14818203561305e-06	0.620711329318368	0.413407094307728	1.02353846239759	unchanged	--	--	--	--	--	--	--	--	--	HMDB0014262	Organic compounds	Organic acids and derivatives	Carboxylic acids and derivatives	Amino acids, peptides, and analogues	6400441	83150-76-9
pos_1093	9'-desmethylgranisetron	1.42933039010433e-06	3.05192593619281e-06	5.15165623688812e-06	1.26225453010114e-06	1.29277253618395e-06	1.12511602897135e-06	1.02401960343051e-06	9.84106773636294e-07	3.09341004224328e-07	3.80840861187576e-07	7.82614102030438e-07	2.75770008607565e-05	-0.668202313416678	0.541489623722767	0.715178363050268	unchanged	--	--	--	--	--	--	--	--	--	--	--	--	--	--	--	--
pos_1094	N-Monodemethyl roxithromycin	8.95558216869551e-05	0.000109137806607339	0.000111233920960069	0.000140849449494431	8.23801980893444e-05	8.47044669545542e-05	8.81782702601784e-05	7.93709580857676e-05	9.32476229105806e-05	9.7455858850682e-05	0.000104634600741942	8.40825755182909e-05	-0.155543935827163	0.270617578128725	1.22177923532637	unchanged	--	--	--	--	--	--	--	--	--	--	--	--	--	--	--	--
pos_1096	20-oxo-leukotriene B4	6.97059379009096e-06	8.82416436862381e-06	7.33869270545804e-06	5.35188354301671e-06	2.57266876458473e-06	7.50615976033672e-06	4.10093553136026e-06	5.94746074923862e-06	7.79471130239226e-06	3.86645759580093e-06	6.79336496773085e-06	7.57344274390507e-06	-0.0504735373871696	0.722565902729662	0.265040290026323	unchanged	--	--	LMFA03020064	20-oxo-leukotriene B4	(5S,6Z,8E,10E,12R,14Z)-5,12-dihydroxy-20-oxoicosa-6,8,10,14-tetraenoic acid	-	Fatty Acyls [FA]	Eicosanoids [FA03]	Leukotrienes [FA0302]	--	--	--	--	--	--	--
pos_1097	DG(15:0/18:4(6Z,9Z,12Z,15Z)/0:0)	0.000140286683351745	0.00016709267303867	0.000151522325007385	0.000148123294552938	0.000119040218748802	0.000130605438083034	0.000136654178525408	0.000145985097081291	0.000159518780344662	0.000141430562969018	0.000141245855012461	0.000137381942570948	0.0157587145323017	0.907442475348402	0.151526034545517	unchanged	--	--	--	--	--	--	--	--	--	HMDB0007077	Organic compounds	Lipids and lipid-like molecules	Fatty Acyls	Lineolic acids and derivatives	53478006	_
pos_1098	6,9,12,15,18,21-Tetracosahexaenoic acid	7.02460324981086e-06	1.13052721499416e-05	7.93586077599539e-06	8.35754388439846e-06	5.66949130613408e-06	8.91701389460395e-06	7.39728927974189e-06	8.51153418171144e-06	9.4273529924651e-06	6.41236106448897e-06	9.09130623038826e-06	8.4916195554742e-06	0.0236775619077036	0.98258687078141	0.207216315816991	unchanged	--	--	--	--	--	--	--	--	--	--	--	--	--	--	--	--
pos_1099	noroxymorphone	0.000198608540701613	0.000153472507352637	0.000165361913492948	0.000107625960241052	0.000217508638735704	0.000184102689038013	0.000132324096121992	0.000149084632352314	0.00017518225452934	0.000135336151002151	0.000149811990007791	0.000196080947393376	-0.110155115197928	0.450086913268387	0.817984285716038	unchanged	--	--	--	--	--	--	--	--	--	--	--	--	--	--	--	--
pos_110	4,6-heptadienal	4.86935893708583e-05	6.95369741017906e-05	6.54676775662883e-05	6.53812813151344e-05	4.92239768212523e-05	5.36520858142986e-05	4.7276642951447e-05	6.05170668987901e-05	5.97552828726393e-05	5.28060527328542e-05	5.96050365416467e-05	5.65044764439405e-05	-0.0553549052619271	0.565977613843067	0.596873088018158	unchanged	--	--	LMFA06000025	4,6-heptadienal	4,6-heptadienal	-	Fatty Acyls [FA]	Fatty aldehydes [FA06]	-	--	--	--	--	--	--	--
pos_1100	3a,7a-Dihydroxycoprostanic acid	0.000348403837339213	0.000280366265856763	0.000408539559064586	0.000505773212758651	0.00058793819024831	0.000433524118633258	0.000301090542259615	0.000427113451534103	0.000513888875433055	0.00041382674643983	0.000469214020758835	0.000600349470391374	0.097088711573452	0.668849464991026	0.29648217142521	unchanged	--	--	--	--	--	--	--	--	--	HMDB0000359	Organic compounds	Lipids and lipid-like molecules	Steroids and steroid derivatives	Bile acids, alcohols and derivatives	5284239	17974-66-2
pos_1101	Licorice glycoside D1	0.000376554780975181	0.000347596813525257	0.000127040415818954	0.000235565599602341	0.000402181536871603	0.000321049085193097	0.000175167601524036	0.000137995092024966	0.000194095616979737	0.000369473113207881	0.000199042838561865	0.000104396872529043	-0.63526407882828	0.0926052551024385	1.67615825364844	unchanged	--	--	LMPK12140028	Licorice glycoside D1	(2R)-7,4'-Dihydroxyflavanone 4'-[4-p-coumaroylapiosyl-(1->2)-glucoside]	-	Polyketides [PK]	Flavonoids [PK12]	Flavanones [PK1214]	--	--	--	--	--	--	--
pos_1102	alpha-D-Xylopyranosyl-(1->6)-beta-D-glucopyranosyl-(1->4)-D-glucose	4.17826609103079e-06	1.2343519330315e-05	4.93544574096887e-06	2.1104414017877e-06	6.05881533456244e-06	7.07134039249448e-06	4.89751170458604e-06	3.54730352353346e-06	8.59151737455894e-06	1.19312306463555e-05	1.03722428993571e-05	7.7278223224841e-06	0.438790447323878	0.391649208190016	0.992407027734023	unchanged	--	--	--	--	--	--	--	--	--	--	--	--	--	--	--	--
pos_1103	6-Angeloylfuranofukinol	2.33144710307891e-05	0.000100573096788742	7.00542892026619e-05	8.21962207895589e-05	3.36432406352874e-05	4.22300861467842e-05	4.30936665999658e-05	4.64521608095571e-05	4.02417848417049e-05	2.02638922500499e-05	2.58301467075833e-05	3.42668655474869e-05	-0.621805718114333	0.118988247072366	1.48751758726544	unchanged	--	--	--	--	--	--	--	--	--	--	--	--	--	--	--	--
pos_1104	Doxycycline	1.51847464137205e-05	2.3714761190215e-05	3.73206597040463e-06	1.89948814421773e-05	1.54653550351419e-05	1.36884069876972e-05	9.16652951424469e-06	3.88837308366332e-06	2.93370288136774e-06	2.53773336780352e-05	6.95040072269308e-06	1.98470096910529e-06	-1.20097948183466	0.165464274105179	1.37540942746092	unchanged	--	--	LMPK07000001	Doxycycline	-	-	Polyketides [PK]	Linear tetracyclines [PK07]	-	--	--	--	--	--	--	--
pos_1105	Saringosterol 3-glucoside	0.00802894209949478	0.00306693255619533	0.00283654525033538	0.00234284006369174	0.00361473611207225	0.00360471379228895	0.00388364126982978	0.00329642526713872	0.00317942922297111	0.00306515257830478	0.00331253585764484	0.0032705274509047	-0.109612724410701	0.525259740484717	0.772703684563604	unchanged	--	--	--	--	--	--	--	--	--	--	--	--	--	--	--	--
pos_1106	(3beta,11alpha,13beta)-3,11,13-Oleananetriol	1.48309608401691e-06	3.7717309116365e-06	9.28578968775202e-06	9.68805848424686e-07	3.70749393628482e-06	3.58853850560766e-06	2.30100974847732e-06	3.29578918434069e-06	1.66150943007112e-06	2.19724539154711e-06	5.79069714071338e-06	3.9984441778844e-05	0.543200297897879	0.427641979574418	0.903875696758582	unchanged	--	--	--	--	--	--	--	--	--	--	--	--	--	--	--	--
pos_1107	(5R)-5-Hydroxyhexanoic acid	0.000417252134260373	0.000285253272032136	0.000273654475579724	0.000241455495777314	0.000263878477496856	0.000282729788503351	0.000302364826527774	0.000290480453869925	0.000282091505160416	0.000269369118546198	0.000276866804161708	0.000293018987018842	-0.0193179765658282	0.760024191039597	0.381540660841988	unchanged	--	--	--	--	--	--	--	--	--	--	--	--	--	--	--	--
pos_1108	13'-Carboxy-alpha-tocotrienol	0.000221343588337577	0.000231350867734143	0.000310437504709171	0.000319160919013412	0.000252019133767807	0.000266960951232361	0.000325985651588932	0.000301838242901421	0.000271753427785651	0.00022194302997239	0.000280242476367214	0.000252808746057233	0.0501124598176848	0.698170036302332	0.446723475777286	unchanged	--	--	--	--	--	--	--	--	--	--	--	--	--	--	--	--
pos_1109	Digitoxin	0.000467780380003551	0.000120557581392474	0.000121793393565843	9.94234514465586e-05	0.000264111947792101	0.000270202750779115	0.000236394691762213	0.0002118110683788	0.000155729816269607	0.000178885282087988	0.000194759842382242	0.000175242116450201	-0.0056230573472682	0.61011712357675	0.613854444621092	unchanged	--	--	LMST01120018	digitoxin	3beta-[2,6-dideoxy-beta-D-ribo-hexopyranosyl-(1-4)-2,6-dideoxy-beta-D-ribo-hexopyranosyl-(1-4)-2,6-dideoxy-beta-D-ribo-hexopyranosyloxy]-14-hydroxy-5beta-card-20(22)-enolide	Crystodigin (TN); Digitoxin; Digitoxoside	Sterol Lipids [ST]	Sterols [ST01]	Cardanolides and derivatives [ST0112]	--	--	--	--	--	--	--
pos_111	PE(16:0/0:0)	0.00300536694767331	0.00287317947780359	0.0024631817672551	0.00356735876284141	0.00211097139637633	0.00278271686302296	0.00313293383483993	0.00322939376462565	0.00223801583863511	0.00339960244002344	0.00303257364417858	0.00292537918702298	0.102593407383383	0.478162553184897	0.732623655058032	unchanged	--	--	LMGP02050002	PE(16:0/0:0)	1-hexadecanoyl-sn-glycero-3-phosphoethanolamine	LPE(16:0/0:0); 16:0 LYSO-PE; 1-palmitoyl-phosphatidylethenolamine; Hexadecanoic acid, 3-[[(2-aminoethoxy)hydroxyphosphinyl]oxy]-2-hydroxypropyl ester, (R)-; 1-Palmitoyl-sn-glycerol-3-L-alpha-phosphorylethanolamine; 1-Palmitoyl-sn-glycerophosphatidylethanolamine; LPE(16:0); LPE(16:0)	Glycerophospholipids [GP]	Glycerophosphoethanolamines [GP02]	Monoacylglycerophosphoethanolamines [GP0205]	HMDB0011503	Organic compounds	Lipids and lipid-like molecules	Glycerophospholipids	Glycerophosphoethanolamines	9547069	53862-35-4
pos_1110	6-Keto-prostaglandin F1a	0.00261119157726958	0.00119421857920501	0.0011072154675643	0.000973760660622241	0.00171342686552684	0.00170067363067146	0.00186587952420425	0.00145519318562285	0.00138065391212545	0.00136161529085922	0.00146959423021067	0.001479899465742	0.030052194190219	0.858919343781785	0.215183210546209	unchanged	C05961	Metabolic pathways(ko01100);;Arachidonic acid metabolism(ko00590)	--	--	--	--	--	--	--	--	--	--	--	--	--	--
pos_1111	1-(2,4,5-Trimethoxyphenyl)-1,2-propanedione	3.68700298951886e-05	4.36711143151978e-05	1.89431433666181e-05	2.78684382529368e-05	3.97009119435493e-05	3.14942863943825e-05	0.00104800478639478	0.00044738959164134	2.85653600017452e-05	3.17071074912861e-05	0.000302737116599381	2.3287784083775e-05	1.90998386568451	0.146967357221885	1.6893149178767	unchanged	--	--	--	--	--	--	--	--	--	--	--	--	--	--	--	--
pos_1112	Glyceryl 5-hydroxydecanoate	6.77034764234987e-05	0.000199503242433711	0.000113197627407317	6.12561653500554e-05	8.65168984283526e-05	0.000102883819629769	3.85361605420345e-05	7.83200041314213e-05	4.54812453062609e-05	0.000179776135777695	9.15499545411537e-05	0.000148823078189182	-0.218340440252163	0.798685467439057	0.17818025925491	unchanged	--	--	--	--	--	--	--	--	--	--	--	--	--	--	--	--
pos_1113	2-Acetyl-3,5,5,6,8,8-hexamethyl-5,6,7,8- tetrahydronaphthalene	6.99532046500781e-05	6.94462005082805e-05	7.27930094738459e-05	7.04567381823745e-05	8.125182362927e-05	7.06058457743423e-05	6.83211200526863e-05	7.30215672613618e-05	9.48518186162534e-05	8.02868839081512e-05	8.27403261278513e-05	7.80319747376229e-05	0.129856454808102	0.127913433795298	1.41010909459404	unchanged	--	--	--	--	--	--	--	--	--	--	--	--	--	--	--	--
pos_1114	N-Docosahexaenoyl phenylalanine	0.000139887308165014	0.000156327255379418	0.000148411258153763	0.000141061048581078	0.000122653602883356	0.000142436192189861	0.000140566608155614	0.0001408078107194	0.000165643621269518	0.000137062501575508	0.000141061456907141	0.000128006357010359	0.00346286046135269	0.955159954752688	0.132093102034863	unchanged	--	--	LMFA08020094	N-docosahexaenoyl phenylalanine	N-(4Z,7Z,10Z,12E,16Z,19Z-docosahexaenoyl)-phenylalanine	-	Fatty Acyls [FA]	Fatty amides [FA08]	N-acyl amines [FA0802]	--	--	--	--	--	--	--
pos_1115	PG(16:1(9Z)/18:1(11Z))	0.0116257898999275	0.0131488642717179	0.0120538823347262	0.0111446662415583	0.00927481642302788	0.0103771866617167	0.00910210362427596	0.0101800268680763	0.0116963889010826	0.00938919024202001	0.0102229163609914	0.00946744352577267	-0.167486913466151	0.0928793953193426	1.65922069520469	unchanged	--	--	--	--	--	--	--	--	--	HMDB0010588	Organic compounds	Lipids and lipid-like molecules	Glycerophospholipids	Glycerophosphoglycerols	53480606	_
pos_1116	2,6-Cyclolycopene-1,5-diol	0.000338852021423393	0.00020383752304253	0.000205733896018339	0.000207759096788693	0.000250177229786744	0.000195395653190675	0.000219284538445175	0.000302765803733405	0.000199569601447179	0.000239097655305419	0.000178564972444387	0.000225494797609368	-0.0296789098900394	0.832809048296042	0.400716491041386	unchanged	--	--	--	--	--	--	--	--	--	--	--	--	--	--	--	--
pos_1117	Auxin b	7.99613042420407e-05	9.84664924173189e-05	9.02332922295829e-05	8.73042741896484e-05	7.39020915505291e-05	8.52521423628869e-05	8.46350356818322e-05	9.02908432093084e-05	9.20981677883024e-05	9.34448069613459e-05	8.90519554028468e-05	8.32993539662929e-05	0.0533459949462536	0.465995952045175	0.854656665885425	unchanged	--	--	--	--	--	--	--	--	--	--	--	--	--	--	--	--
pos_1118	Yucalexin P21	8.58020868255383e-05	0.000103294663878938	9.13838619354542e-05	0.000103967252323942	9.53344354820337e-05	9.54624785657737e-05	9.59687544299865e-05	9.29520787556944e-05	8.58470345846735e-05	0.000104391523725997	9.55020449736752e-05	8.95953387513134e-05	-0.0273210483571411	0.644260475637933	0.398274138726301	unchanged	--	--	--	--	--	--	--	--	--	--	--	--	--	--	--	--
pos_1119	Lyciumin A	7.32134153706363e-06	2.13452097940918e-05	5.26630187804305e-06	8.26771638220247e-06	9.12581753817921e-06	8.85557408903864e-06	7.89847011834225e-06	5.51255477622023e-06	1.01068734701599e-05	8.75526514705158e-06	8.43550830482454e-06	6.2563397242445e-06	-0.239210551450984	0.400961419270891	0.719147960971154	unchanged	--	--	--	--	--	--	--	--	--	--	--	--	--	--	--	--
pos_112	Hyacinthin	6.01415391333233e-05	0.000131747586482899	8.17747557657224e-05	0.00014190716213136	7.9042942086049e-05	0.000104040528510986	6.90257693794996e-05	8.73760345642211e-05	0.000206964308262416	7.52547751045857e-05	0.000152742794127259	0.000141495622725756	0.237479334169475	0.409815376385543	0.876852763024328	unchanged	C00601	Phenylalanine metabolism(ko00360);;Metabolic pathways(ko01100)	LMPK12010139	Hyacinthin	Cyanidin 3-(6-O-p-coumarylglucoside)	-	Polyketides [PK]	Flavonoids [PK12]	Anthocyanidins [PK1201]	HMDB0006236	Organic compounds	Benzenoids	Benzene and substituted derivatives	Phenylacetaldehydes	998	122-78-1
pos_1120	Ascochitine	3.72094681091607e-05	5.84673907299818e-05	3.66921520925922e-05	4.6084716757116e-05	4.68834527389815e-05	3.85345558656832e-05	4.0914225485486e-05	4.08196601983785e-05	4.51073953877123e-05	4.88223530133163e-05	4.18790551012635e-05	2.83054114477801e-05	-0.101369026115457	0.514546667769188	0.643851342715174	unchanged	--	--	--	--	--	--	--	--	--	--	--	--	--	--	--	--
pos_1122	Desflurane	1.65948588385725e-05	2.78308373801605e-05	1.35583073022323e-05	1.43343709854028e-05	1.51104607376437e-05	1.39409874422138e-05	1.53706661499096e-05	1.11870432211643e-05	1.63928559579705e-05	8.60115055409808e-06	1.39566420908446e-05	1.23260315040459e-05	-0.363436539317618	0.160269735278027	1.27065138875203	unchanged	--	--	--	--	--	--	--	--	--	--	--	--	--	--	--	--
pos_1123	(S)-N-(4,5-Dihydro-1-methyl-4-oxo-1H-imidazol-2-yl)alanine	5.60765745920808e-06	2.12216575324237e-06	1.45832819164012e-06	1.35005777165612e-06	3.29609581388344e-06	2.04759010308574e-06	2.17214296713505e-06	1.35629491896643e-06	2.50961986237688e-06	1.47554508830827e-06	1.92264647165297e-06	5.22162436743991e-06	-0.0883097059030646	0.820926355997515	0.28692145948173	unchanged	--	--	--	--	--	--	--	--	--	--	--	--	--	--	--	--
pos_1124	Butenylcarnitine	3.16992475366062e-05	1.73989049749822e-05	0.000183366365940754	0.000476829500493218	8.76193668648426e-05	0.000145990403408562	7.27474710592147e-05	0.000330713610661672	1.35173456853546e-05	2.31771690295756e-05	0.000218141383527701	0.000877607082103626	0.2043439094109	0.532116690473228	0.646424880680843	unchanged	--	--	LMFA07070053	Butenylcarnitine	(3S)-3-[(2E)-but-2-enoyloxy]-4-(trimethylazaniumyl)butanoate	-	Fatty Acyls [FA]	Fatty esters [FA07]	Fatty acyl carnitines [FA0707]	--	--	--	--	--	--	--
pos_1125	PS(18:1(9Z)/18:2(9Z,12Z))	0.00381095036607501	0.00403521611338266	0.00371600337784222	0.00352513244755268	0.00282111122145249	0.00312373436888315	0.0026824840005579	0.00314700302186808	0.00349878381084893	0.00287484637814352	0.00309494237336883	0.00294072329005139	-0.199965209011291	0.0637441693623688	1.86384553811796	unchanged	--	--	LMGP03010958	PS(18:1(9Z)/18:2(9Z,12Z))	1-(9Z-octadecenoyl)-2-(9Z,12Z-octadecadienoyl)-glycero-3-phosphoserine	PS(36:3); PS(18:1_18:2)	Glycerophospholipids [GP]	Glycerophosphoserines [GP03]	Diacylglycerophosphoserines [GP0301]	HMDB0012391	Organic compounds	Lipids and lipid-like molecules	Glycerophospholipids	Glycerophosphoserines	52926065	_
pos_1127	11'-Carboxy-gamma-chromanol	0.000284122315862938	0.000439178697424055	0.000234789331557595	0.000427814996000948	0.00036642503477518	0.000357659054770402	0.000559934531808377	0.000428727106197649	0.000432440428959989	0.000363195343851445	0.000453171014557383	0.000234476615781695	0.214381227504058	0.29892037926549	1.19426520090736	unchanged	--	--	--	--	--	--	--	--	--	--	--	--	--	--	--	--
pos_1128	Germacrenone	1.23250554389982e-05	1.69399771067969e-05	1.582401495655e-05	1.34977744508363e-05	1.49095384966467e-05	1.34011167263024e-05	1.7930277194757e-05	1.78366551089813e-05	1.55487727746986e-05	1.53698330271106e-05	1.61047057375462e-05	2.56768917624143e-05	0.304440971763992	0.0775643498263057	1.89200611577276	unchanged	--	--	--	--	--	--	--	--	--	--	--	--	--	--	--	--
pos_1129	Octanoylglucuronide	1.51104462466777e-05	2.25253991540762e-05	8.67357509760161e-06	1.54023494951205e-05	2.21730229200184e-05	1.63984381364678e-05	1.91707303967034e-05	1.49879124301617e-05	1.26574669936424e-05	1.95293616848153e-05	1.72183793885763e-05	1.16486103263412e-05	-0.0358110743383211	0.743574718198915	0.240909801110924	unchanged	C03033	Bile secretion(ko04976);;Pentose and glucuronate interconversions(ko00040);;Metabolic pathways(ko01100)	--	--	--	--	--	--	--	HMDB0010347	Organic compounds	Organic oxygen compounds	Organooxygen compounds	Carbohydrates and carbohydrate conjugates	127448	99910-55-1
pos_113	TyrMe-Ile-OH	7.59913891908409e-06	4.03876118827933e-05	7.26499846841624e-07	8.50517912699751e-07	8.76331155561977e-08	3.00777569941681e-07	3.97003263777179e-07	6.94079648427177e-07	2.25883483501505e-07	1.29876554444314e-06	5.11563828792648e-07	3.43192494458743e-07	-1.41004166341293	0.288029134773315	0.994022259739685	unchanged	--	--	--	--	--	--	--	--	--	--	--	--	--	--	--	--
pos_1130	Tripelennamine	2.90570387738273e-05	2.87973609376459e-05	1.88618060688662e-05	1.94858454173233e-05	2.59397252245837e-05	2.27119592211572e-05	2.31502859121247e-05	2.12076415659828e-05	1.82904622729169e-05	2.35595518337223e-05	2.28694287896063e-05	2.35281474622392e-05	-0.111751350163301	0.344746084979449	0.931457514647634	unchanged	--	--	--	--	--	--	--	--	--	--	--	--	--	--	--	--
pos_1131	DG(22:6(4Z,7Z,10Z,13Z,16Z,19Z)/18:0/0:0)	6.23874571125796e-05	1.02617891288301e-05	7.0759421750313e-06	2.5239081290448e-06	6.80651826173019e-05	2.82746672837383e-05	6.19867694682542e-05	5.86829021339649e-05	1.74685799221951e-05	0.000106095541287247	5.62905087017876e-05	3.8325855891683e-05	1.56141231317699	0.144050251527957	1.36007838299472	unchanged	--	--	--	--	--	--	--	--	--	HMDB0007767	Organic compounds	Lipids and lipid-like molecules	Glycerolipids	Diradylglycerols	53478518	_
pos_1132	Trihexosylceramide (d18:1/22:0)	7.03650421149509e-05	4.80698628523893e-05	4.24548342221493e-05	4.42589598145811e-05	4.41580164442006e-05	4.56949921851893e-05	4.69726648132722e-05	4.84396873837109e-05	4.66904538360203e-05	4.8504777301827e-05	4.65408309641998e-05	4.71565564362917e-05	-0.0302300958836863	0.696910113418221	0.534882973518073	unchanged	--	--	--	--	--	--	--	--	--	--	--	--	--	--	--	--
pos_1133	1-(3,5-Dihydroxyphenyl)-2-pentadecanone	4.16938957993708e-05	4.3483998952872e-05	4.10149859993149e-05	3.53537382108312e-05	3.85768279915472e-05	4.08617090644012e-05	2.95133028410148e-05	3.75435339553621e-05	3.71797809782533e-05	5.28320332949445e-05	3.99828080276213e-05	4.30012938813296e-05	-0.0245329774992769	0.964492830276175	0.124567910803241	unchanged	--	--	--	--	--	--	--	--	--	--	--	--	--	--	--	--
pos_1135	(S)-Argpyrimidine	0.000111460767771895	9.48839835491075e-05	9.08262437363655e-05	7.95503210924722e-05	8.10656502145795e-05	8.80450874044308e-05	8.80273457404817e-05	8.9319423076233e-05	9.15076169598596e-05	8.42795701736856e-05	8.77557499777824e-05	8.87314301080973e-05	-0.0346665855591795	0.598360080434859	0.594520754886339	unchanged	--	--	--	--	--	--	--	--	--	--	--	--	--	--	--	--
pos_1136	Uralenolide	0.00012797224835355	0.000183101625081416	8.43552777705601e-05	0.000105063865685357	8.05523664038767e-05	0.000116179910723084	0.000127743084391693	0.000166082524328515	0.000117622743659662	0.000156538429151503	0.000154565350589436	0.000244564840102378	0.487601906994866	0.0897009035371253	1.76390109627415	unchanged	--	--	--	--	--	--	--	--	--	HMDB0038797	Organic compounds	Lipids and lipid-like molecules	Steroids and steroid derivatives	_	131752468	111150-27-7
pos_1137	Vinaginsenoside R5	0.000116418634861374	1.98794122218047e-05	2.49497297635004e-05	2.51049798328565e-05	6.97442521018488e-05	7.29398998724739e-05	5.83592612988263e-05	4.24907457432618e-05	3.8473049213513e-05	3.94197160017706e-05	4.48043131147436e-05	3.78692521300802e-05	-0.034794184016036	0.50929470105571	0.767064030904527	unchanged	--	--	--	--	--	--	--	--	--	--	--	--	--	--	--	--
pos_1138	Epitheaflagallin 3-O-gallate	3.37406665788188e-05	5.42621412567624e-06	8.85400566269635e-06	7.10115578981515e-06	1.7850008927888e-05	1.81948714754241e-05	1.65510857245035e-05	1.44662932352948e-05	1.2502424900545e-05	1.06436489570425e-05	1.22429452810956e-05	1.26799818235e-05	0.0673057162952766	0.665516768660351	0.550083576340797	unchanged	--	--	--	--	--	--	--	--	--	HMDB0033288	Organic compounds	Benzenoids	Benzene and substituted derivatives	Benzoic acids and derivatives	14520971	102067-92-5
pos_1139	dapsone hydroxylamine	4.91549039822314e-05	7.78231001790698e-05	5.04066395086156e-05	7.87428874656303e-05	4.70654619208365e-05	6.02093298775753e-05	0.000179488170271839	4.16674624583095e-05	7.61516256586816e-05	6.60173186837613e-05	6.75615977205772e-05	7.53934047928043e-05	0.359024372460935	0.291591898654146	1.33788015123647	unchanged	--	--	--	--	--	--	--	--	--	--	--	--	--	--	--	--
pos_114	1-Hydroxy-2-(beta-D-glucosyloxy)-9,10-anthraquinone	1.10732069209245e-06	2.59014230757853e-06	8.09291477016776e-07	2.62057201112266e-06	1.60859380685155e-06	1.64538471902959e-06	1.87860000070578e-06	1.25016957399187e-06	3.21281996425466e-06	3.18093650072597e-06	1.94239446494537e-06	0.000213845546092148	1.54573207317068	0.356288302855463	1.04579530019822	unchanged	--	--	LMFA13010061	1-hydroxy-2-(beta-D-glucosyloxy)-9,10-anthraquinone	1-hydroxy-2-(beta-D-glucopyranosyloxy)-9,10-anthraquinone	1,2-dihydroxy-9,10-anthraquinone 2-O-beta-D-glucopyranoside;1-hydroxy-2-(beta-D-glucosyloxy)-9,10-anthraquinone;1-hydroxy-9,10-dioxo-9,10-dihydroanthracen-2-yl beta-D-glucopyranoside;2-(beta-D-glucopyranosyloxy)-1-hydroxy-9,10-anthracenedione;2-alizarin-beta-D-glucoside;alizarin-2-beta-D-glucopyranoside	Fatty Acyls [FA]	Fatty acyl glycosides [FA13]	Fatty acyl glycosides of mono- and disaccharides [FA1301]	--	--	--	--	--	--	--
pos_1140	2,3-Dihydro-5,5',7,7'-tetrahydroxy-2-(4-hydroxyphenyl)[3,8'-bi-4H-1-benzopyran]-4,4'-dione	2.2901186222075e-05	3.0272290577616e-05	9.8877927459786e-06	1.00482930718052e-05	1.14103120878369e-05	2.04703569829563e-05	4.6891298583239e-05	1.3876221230749e-05	6.54238048184648e-06	1.65711829316501e-05	2.58303236804164e-05	5.27856590930183e-06	-0.123697123857699	0.822784211135685	0.452276392481912	unchanged	--	--	--	--	--	--	--	--	--	--	--	--	--	--	--	--
pos_1141	Isovalerylglutamic acid	1.72535810088484e-05	2.5607171467383e-05	8.31919499750707e-06	1.77626953626292e-05	2.03288102216096e-05	1.50831721446601e-05	4.73858259215339e-05	3.1145888413144e-05	3.6666681758369e-05	2.53988822599635e-05	3.35311177847392e-05	1.32588457165065e-05	0.821985341430841	0.0313728760477961	2.17392310639798	up	--	--	--	--	--	--	--	--	--	--	--	--	--	--	--	--
pos_1142	8-Oxohexadecanoic acid	3.2615809818917e-05	3.60292019592936e-05	6.25403914675215e-05	4.31917720790492e-05	5.31229229463143e-05	4.84376994141158e-05	3.15311670743297e-05	3.39644574406476e-05	4.90673620473906e-05	4.71906010790507e-05	3.8942897480649e-05	4.24379806984463e-05	-0.165827316887217	0.336628786788663	1.07282806296132	unchanged	--	--	--	--	--	--	--	--	--	--	--	--	--	--	--	--
pos_1143	PE(15:0/20:2(11Z,14Z))	7.45195400458137e-06	6.70664798489389e-06	1.85788846995226e-06	1.71658318304358e-06	6.36832831399463e-06	5.25051210775874e-06	2.1367799335147e-06	1.36535314825349e-06	9.18290147686821e-07	1.30459372443255e-06	5.13156736766791e-06	1.34561322289143e-06	-1.29779813212204	0.0440446544853637	1.91196599865638	down	--	--	LMGP02010465	PE(15:0/20:2(11Z,14Z))	1-pentadecanoyl-2-(11Z,14Z-eicosadienoyl)-glycero-3-phosphoethanolamine	PE(35:2); PE(15:0_20:2)	Glycerophospholipids [GP]	Glycerophosphoethanolamines [GP02]	Diacylglycerophosphoethanolamines [GP0201]	HMDB0008901	Organic compounds	Lipids and lipid-like molecules	Glycerophospholipids	Glycerophosphoethanolamines	52924168	_
pos_1145	PC(15:0/22:5(4Z,7Z,10Z,13Z,16Z))	0.000102013880147647	0.000152492251334751	0.000407752578443822	9.12910474417522e-05	0.000181876562755282	0.000191998596943191	0.000220988191379428	0.000236587057216014	0.000112738624568061	0.000322449850516079	0.000384371970696536	0.000392483684688169	0.637622803458926	0.191934936844848	1.31576740535394	unchanged	--	--	--	--	--	--	--	--	--	HMDB0007956	Organic compounds	Lipids and lipid-like molecules	Glycerophospholipids	Glycerophosphocholines	53478653	_
pos_1146	Norethindrone	8.47239892865223e-05	0.000155847164350949	0.000143401406012619	0.000130384728874745	9.68454630025855e-05	0.000118961840770104	0.000103515328635137	0.000118042771719072	0.000135496642751571	0.000113086140570205	0.000121810563324284	0.000113360305802659	-0.0229459155112703	0.739673920007339	0.244813205049482	unchanged	--	--	LMST02030097	Norethindrone	17alpha-hydroxy-19-norpregn-4-en-20-yn-3-one	-	Sterol Lipids [ST]	Steroids [ST02]	C21 steroids (gluco/mineralocorticoids, progestogins) and derivatives [ST0203]	--	--	--	--	--	--	--
pos_1147	DG(14:1(9Z)/15:0/0:0)	8.96548462783599e-06	2.02362385694286e-05	0	0	4.45196872364774e-05	1.31697119191229e-05	2.27399563169784e-07	0	2.64768061513801e-05	0	3.98258333199166e-06	7.26461297244015e-08	-2.64968022794824	0.277128626371091	1.12484137447805	unchanged	--	--	--	--	--	--	--	--	--	HMDB0007039	Organic compounds	Lipids and lipid-like molecules	Glycerolipids	Diradylglycerols	53477974	_
pos_1148	Corticosterone	0.00020104773142442	7.4984878856135e-05	7.66539621135424e-05	6.60637051393494e-05	0.000125723395393402	0.000130840524541348	0.000122560342350822	0.000109910181933234	9.20818829296306e-05	9.86295659519886e-05	0.000102096119773093	0.000167010045114473	0.122021202025271	0.908330481912339	0.0967202480595202	unchanged	C02140	Steroid hormone biosynthesis(ko00140);;Regulation of lipolysis in adipocytes(ko04923);;Aldosterone synthesis and secretion(ko04925);;Prion disease(ko05020);;Metabolic pathways(ko01100)	LMST02030186	corticosterone	11beta,21-dihydroxypregn-4-ene-3,20-dione	(11beta)-11,21-dihydroxypregn-4-ene-3,20-dione; 11beta,21-Dihydroxy-4-pregnene-3,20-dione; 11beta,21-dihydroxyprogesterone; 17-deoxycortisol; CORTICOSTERONE; Corticosterone; Kendall's compound B; Reichstein's substance H; corticosterone	Sterol Lipids [ST]	Steroids [ST02]	C21 steroids (gluco/mineralocorticoids, progestogins) and derivatives [ST0203]	--	--	--	--	--	--	--
pos_1149	(S)-p-Mentha-1,8-dien-10-yl acetate	2.67649475323759e-05	2.8043185333518e-05	8.48594187551465e-06	1.23069515301275e-05	1.81491007307866e-05	1.14505992239769e-05	1.46363256260179e-05	1.44242793184093e-05	1.33265414602857e-05	1.01618175905275e-05	1.25482840767014e-05	1.65558279172854e-05	-0.242598927738761	0.306219132137576	1.04702422729959	unchanged	--	--	--	--	--	--	--	--	--	--	--	--	--	--	--	--
pos_115	PA(P-16:0/14:0)	0.00506188740020014	0.00536967912439326	0.00406019796121629	0.00530592904020369	0.00493869805917119	0.00497134095145947	0.00550036010334791	0.00483675853494804	0.00569455205229251	0.00517424344022865	0.00524502520519983	0.00414121041665525	0.0406777549650217	0.630052634423214	0.550859881086183	unchanged	--	--	LMGP10030003	PA(P-16:0/14:0)	1-(1Z-hexadecenyl)-2-tetradecanoyl-glycero-3-phosphate	PA(P-30:0); PA(P-16:0/14:0)	Glycerophospholipids [GP]	Glycerophosphates [GP10]	1-(1Z-alkenyl),2-acylglycerophosphates [GP1003]	--	--	--	--	--	--	--
pos_1150	1-Acetoxy-2-hydroxy-16-heptadecen-4-one	0.000207613115783886	0.000185180540263676	0.000240533712572556	0.000255722475878777	0.000151575413079437	0.000214015643375558	0.000280175496118886	0.000278484596259226	0.000268864722093845	0.000184649679281645	0.000267203344635357	0.000313248453386198	0.346574136619578	0.0365923216846916	2.00982245514272	up	--	--	LMFA05000594	1-Acetoxy-2-hydroxy-16-heptadecen-4-one	2-hydroxy-4-oxoheptadec-16-en-1-yl acetate	-	Fatty Acyls [FA]	Fatty alcohols [FA05]	-	--	--	--	--	--	--	--
pos_1151	Phenylethyl primeveroside	4.70068569405083e-06	6.53219214955791e-06	1.79883462074518e-05	1.04757410864096e-05	6.76348696763214e-06	6.59214754729847e-06	6.14750064857477e-06	1.00631988580853e-05	5.83772009783282e-06	6.84443891330851e-06	6.81660772171375e-06	9.91840365328589e-06	-0.104401498793298	0.580810207361642	0.653406360753088	unchanged	--	--	--	--	--	--	--	--	--	--	--	--	--	--	--	--
pos_1153	4-Hydroxydebrisoquine	2.18528060986624e-05	5.45436881692451e-06	0	2.90987740056424e-07	1.64633062837045e-06	5.05294929951965e-06	4.04306628669005e-06	1.1735699118844e-06	0	0	0	0	-12.1221350776891	0.212613140086725	1.35640794475619	unchanged	--	--	--	--	--	--	--	--	--	HMDB0006468	Organic compounds	Organoheterocyclic compounds	Tetrahydroisoquinolines	_	107669	59333-79-8
pos_1155	5b-Cholestane-3a,7a,12a,23S,25-pentol	6.41637638040231e-05	9.49540066476692e-05	5.79661265875022e-05	9.23141099584598e-05	5.81576886457793e-05	7.61861389172702e-05	9.66554160328032e-05	7.93749891437825e-05	7.15845012550829e-05	9.91737868011721e-05	8.62579961548542e-05	6.98309031909511e-05	0.197236270051986	0.274057284197261	1.26080873354197	unchanged	--	--	LMST01010241	-	5b-Cholestane-3a,7a,12a,23S,25-pentol	-	Sterol Lipids [ST]	Sterols [ST01]	Cholesterol and derivatives [ST0101]	--	--	--	--	--	--	--
pos_1156	1-Hydroxyacorenone	7.57635131255473e-07	3.7721006870286e-07	2.303363839234e-06	2.57409455984561e-06	2.71229015489524e-06	1.34339108536546e-06	2.13960544094797e-06	1.73335960087176e-06	1.30777119548321e-06	1.8942153058477e-06	1.91540687131701e-06	1.9518390898796e-06	0.412649627498915	0.741489883906838	0.236985616993574	unchanged	--	--	--	--	--	--	--	--	--	--	--	--	--	--	--	--
pos_1157	Naematolone	0.000441134243019972	0.000661633500709085	0.000316031454755349	0.000506855039887657	0.000592816494814073	0.000470871235824212	0.00049127291294457	0.000385759024601094	0.000523410850766736	0.000503201263972108	0.000441354384224113	0.000344922253205908	-0.130049476129436	0.407957083186621	0.769403411650016	unchanged	--	--	--	--	--	--	--	--	--	--	--	--	--	--	--	--
pos_1158	Withanolide A	0.00167354398457423	0.00170610866701526	0.00172242064773414	0.0016415314575875	0.00151676998908912	0.00174186385580735	0.0012472056205587	0.00159483573109679	0.00185589968652304	0.00141692985722118	0.00161095370815057	0.00184176502157113	-0.076455304288551	0.505629769097711	0.738640107565738	unchanged	--	--	LMST01160019	Withanolide A	15-[1-(4,5-dimethyl-6-oxo-3,6-dihydro-2H-pyran-2-yl)-1-hydroxyethyl]-5-hydroxy-10,14-dimethyl-3-oxapentacyclo[9.7.0.0^{2,4}.0^{5,10}.0^{14,18}]octadec-7-en-9-one	-	Sterol Lipids [ST]	Sterols [ST01]	Withanolides and derivatives [ST0116]	--	--	--	--	--	--	--
pos_1159	DG(18:1n7/0:0/18:2n6)	0.00280774946773264	0.00320313011525535	0.00496570074758182	0.00226699347917109	0.00188405874891731	0.00286067585539471	0.00143027441120738	0.00321670608353567	0.0027899642333211	0.00121733153612624	0.00280803961239483	0.00596769047487424	-0.176548886194128	0.912517405418938	0.0952485787971942	unchanged	--	--	--	--	--	--	--	--	--	HMDB0056183	Organic compounds	Lipids and lipid-like molecules	Glycerolipids	Diradylglycerols	131801892	_
pos_116	Isobutyl 2-furanpropionate	3.46106764447667e-05	3.43305429033652e-05	1.88028214463842e-05	3.45922918430992e-05	2.33561139709314e-05	2.67624397873465e-05	3.15861659630621e-05	3.20805753371542e-05	1.60144873594596e-05	4.87858759702224e-05	2.83737606502682e-05	2.39468904701266e-05	0.0258517052321743	0.797668666690144	0.247374200534526	unchanged	--	--	LMFA07010915	Isobutyl 2-furanpropionate	2-methylpropyl 3-(furan-2-yl)propanoate	-	Fatty Acyls [FA]	Fatty esters [FA07]	Wax monoesters [FA0701]	--	--	--	--	--	--	--
pos_1160	Threoninyl-Glycine	0.000487231045954051	0.000507813274749488	0.000173158597197415	0.000400538020043473	0.000249847994954624	0.000297753021899771	0.000241717017345679	0.000214434924352907	0.000143518336416612	0.000472881090668238	0.000256270912919329	0.000186320053002659	-0.487680002650634	0.196409939962305	1.31348883416766	unchanged	--	--	--	--	--	--	--	--	--	HMDB0029061	Organic compounds	Organic acids and derivatives	Carboxylic acids and derivatives	Amino acids, peptides, and analogues	7010575	686-44-2
pos_1161	PS(18:0/18:3(9Z,12Z,15Z))	0.000334731008373767	0.000126364365919649	0.000113803236067314	0.000109484399267175	0.000158793011226878	0.000148430618618313	0.000178243671836602	0.000141546586336688	0.000130171629492069	0.000130786806833907	0.000139031145452527	0.000134985136835462	-0.103971062848601	0.547380689821541	0.733103609059597	unchanged	--	--	LMGP03010316	PS(18:0/18:3(9Z,12Z,15Z))	1-octadecanoyl-2-(9Z,12Z,15Z-octadecatrienoyl)-glycero-3-phosphoserine	PS(36:3); PS(18:0_18:3)	Glycerophospholipids [GP]	Glycerophosphoserines [GP03]	Diacylglycerophosphoserines [GP0301]	HMDB0012381	Organic compounds	Lipids and lipid-like molecules	Glycerophospholipids	Glycerophosphoserines	52925426	_
pos_1162	3-Hydroxy-1-phenyl-1-eicosanone	0.00016022154882097	0.000197319688761785	0.000156249457871854	0.000166298727663172	0.000177772311582501	0.000166845769563076	0.000211251558892516	0.000184778116373585	0.000240291484580454	0.000143066796086331	0.000188658447466419	0.00012449608555896	0.0618883678191757	0.562319686010329	0.695446198091567	unchanged	--	--	--	--	--	--	--	--	--	--	--	--	--	--	--	--
pos_1163	Meprobamate	4.0330391202795e-05	4.57508328991549e-05	7.09559302630991e-05	6.24256012837863e-05	4.50187907730334e-05	5.34900303905838e-05	4.85884477477697e-05	5.37409279564555e-05	4.76990073017062e-05	4.32354813197675e-05	5.21823273738139e-05	5.99287901637545e-05	-0.0374839510063829	0.705210704938895	0.399763451787454	unchanged	--	--	--	--	--	--	--	--	--	--	--	--	--	--	--	--
pos_1164	4-Hydroxyretinoic acid glucuronide	0	0	0	9.38222855853046e-06	0	0	0	2.54810904074486e-06	0	0	0	2.11442330509771e-05	4.13175895685966	0.550358083223451	0.635473166382417	unchanged	--	--	--	--	--	--	--	--	--	--	--	--	--	--	--	--
pos_1165	Estradiol	9.72910895784071e-06	1.42217739365219e-05	1.6074157687488e-05	1.42935051796849e-05	1.05058109237541e-05	1.27157765188178e-05	1.0281122720025e-05	1.44283852437373e-05	1.34545587987123e-05	1.18322987420619e-05	1.48127799042924e-05	2.05088469744169e-05	0.126071822762668	0.476662740573101	0.773857143770825	unchanged	C00951	Endocrine resistance(ko01522);;GnRH secretion(ko04929);;Steroid hormone biosynthesis(ko00140);;Breast cancer(ko05224);;Endocrine and other factor-regulated calcium reabsorption(ko04961);;Estrogen signaling pathway(ko04915);;Prostate cancer(ko05215);;Thermogenesis(ko04714);;Metabolic pathways(ko01100);;Prolactin signaling pathway(ko04917);;Ovarian steroidogenesis(ko04913);;Pathways in cancer(ko052…	--	--	--	--	--	--	--	HMDB0000151	Organic compounds	Lipids and lipid-like molecules	Steroids and steroid derivatives	Estrane steroids	5757	50-28-2
pos_1166	Neogrifolin	1.54523656377695e-05	2.30353321215552e-05	1.93920862846525e-05	1.85197432520951e-05	2.30376297396652e-05	2.14101906417835e-05	2.08824165718144e-05	2.08019215723215e-05	5.7438009301598e-05	2.25539544085542e-05	3.08533291292342e-05	2.23292057192543e-05	0.436708593121475	0.188441767074163	1.37396341371197	unchanged	--	--	--	--	--	--	--	--	--	HMDB0030053	Organic compounds	Lipids and lipid-like molecules	Prenol lipids	Sesquiterpenoids	9874426	23665-96-5
pos_1167	Estriol-16-Glucuronide	0.000107331036752208	0.000131781555058187	0.000117861596532799	0.000119799557457828	0.000100130169239552	9.47796740869775e-05	0.000103147160278868	0.000114601138512599	0.000113038977622427	0.000100809889606698	0.000113299447059447	0.000122889704269997	-0.0025284243060284	0.923039016458105	0.0947364882759523	unchanged	--	--	--	--	--	--	--	--	--	--	--	--	--	--	--	--
pos_1168	PA(16:0/18:2(9Z,12Z))	0.000963512694833286	0.00100351216732148	0.000779589658603413	0.000687125002357326	0.000713153165304309	0.000765165104175288	0.000655533212288351	0.00072020720581387	0.000876762130938084	0.000713894341443796	0.000741441187960727	0.000704735400805731	-0.145361590194586	0.217936791287045	1.25506171077817	unchanged	--	--	LMGP10010023	PA(16:0/18:2(9Z,12Z))	1-hexadecanoyl-2-(9Z,12Z-octadecadienoyl)-sn-glycero-3-phosphate	9,12-Octadecadienoic acid (Z,Z)-, 1-[[(1-oxohexadecyl)oxy]methyl]-2-(phosphonooxy)ethyl ester, (R)-; 1-Palmitoyl-2-linoleoyl-sn-glycero-3-phosphate; PA(16:0/18:2); PA(34:2); PA(16:0_18:2)	Glycerophospholipids [GP]	Glycerophosphates [GP10]	Diacylglycerophosphates [GP1001]	--	--	--	--	--	--	--
pos_1169	Testosterone	3.52334022937249e-05	3.74662998881151e-05	0.000118525344119826	2.61448164987287e-05	9.02929485547147e-05	5.38055243073749e-05	2.95488721811823e-05	3.74731015696618e-05	2.49600123750229e-05	0.000139376879512194	5.03456419622985e-05	6.61926775162656e-05	-0.105086426394037	0.923284146720263	0.192993679112459	unchanged	C00535	Steroid hormone biosynthesis(ko00140);;Ovarian steroidogenesis(ko04913);;Pathways in cancer(ko05200);;Prostate cancer(ko05215);;Endocrine resistance(ko01522);;GnRH secretion(ko04929);;Metabolic pathways(ko01100)	LMST02020002	Testosterone	17beta-hydroxyandrost-4-en-3-one	-	Sterol Lipids [ST]	Steroids [ST02]	C19 steroids (androgens) and derivatives [ST0202]	HMDB0002833	Organic compounds	Lipids and lipid-like molecules	Steroids and steroid derivatives	Sulfated steroids	119207	651-45-6
pos_117	4'-METHOXYCHALCONE	0.000319224355702004	0.000500199869520371	0.000250335235302967	0.000411703784645202	0.000396359370701674	0.000352159472519696	0.000375843887734663	0.000332756342991808	0.000438827696772404	0.000376745691050184	0.000359538603605168	0.000251030498066759	-0.0499544711647175	0.721328886162017	0.289166181591955	unchanged	--	--	LMPK12120188	-	4'-Methoxychalcone	-	Polyketides [PK]	Flavonoids [PK12]	Chalcones and dihydrochalcones [PK1212]	HMDB0032585	Organic compounds	Phenylpropanoids and polyketides	Linear 1,3-diarylpropanoids	Chalcones and dihydrochalcones	641818	22966-19-4
pos_1170	27-Nor-5b-cholestane-3a,7a,12a,24,25-pentol	0.000171956897011215	0.000224558725044886	0.000280856172480143	0.000286387735323078	0.000179020414986807	0.000230103276014475	0.000268892118271439	0.000261846266401785	0.000199464139574081	0.000213131043437795	0.00024010197996104	0.0002440726672036	0.075871510466321	0.698746247095822	0.500908608425163	unchanged	--	--	LMST01010213	27-Nor-cholestane-pentol	27-Nor-5b-cholestane-3a,7a,12a,24,25-pentol	-	Sterol Lipids [ST]	Sterols [ST01]	Cholesterol and derivatives [ST0101]	--	--	--	--	--	--	--
pos_1171	(all-Z)-8,11,14-Heptadecatrienal	5.01115788628649e-06	5.3193014876712e-06	7.05906392484538e-06	8.53223326568722e-06	5.82932272762863e-06	6.43541383145748e-06	6.5855495334698e-06	1.0151030130447e-05	7.5998279758267e-06	4.72660452595878e-06	6.46026809507901e-06	9.30280746989828e-06	0.210124483169903	0.285266807083999	1.07474989092432	unchanged	--	--	--	--	--	--	--	--	--	--	--	--	--	--	--	--
pos_1173	Hypusine	4.6725233567475e-06	4.03124956104254e-06	4.34089734338993e-06	4.88349552466205e-06	3.13382266253474e-06	3.99135745086751e-06	4.13212960573114e-06	3.83261952349001e-06	6.14087552629792e-06	4.21282328819459e-06	4.18313821267656e-06	4.90190422908859e-06	0.125039422082519	0.384012124884471	0.843148677774281	unchanged	--	--	LMFA01050514	Hypusine	(2S)-2-amino-6-{[(2S)-4-amino-2-hydroxybutyl]amino}hexanoic acid	-	Fatty Acyls [FA]	Fatty Acids and Conjugates [FA01]	Hydroxy fatty acids [FA0105]	--	--	--	--	--	--	--
pos_1174	Shyobunyl acetate	5.15321245560088e-05	5.77487442971125e-05	3.11544653659706e-05	2.93919591378517e-05	4.4500774628491e-05	3.44486126936039e-05	3.73109741983188e-05	2.77542519474266e-05	3.57716059074474e-05	3.80702370807094e-05	2.92121863400397e-05	2.30445573178113e-05	-0.356269132592635	0.113303885760759	1.5493385570608	unchanged	--	--	--	--	--	--	--	--	--	--	--	--	--	--	--	--
pos_1176	(all-E)-3,5,7-Tridecatriene-9,11-diyn-1-ol	6.66875805786219e-06	7.44954550190186e-06	8.63624924448722e-06	9.88825141955328e-06	8.2494085322093e-06	6.28050202393656e-06	1.31304190694113e-05	9.35110685086418e-06	9.11592246827236e-06	9.80945721714828e-06	9.38974836625896e-06	8.00716960728467e-06	0.31817627188439	0.0575714940451031	1.85765610126141	unchanged	--	--	--	--	--	--	--	--	--	--	--	--	--	--	--	--
pos_1177	p-HPEA-EDA	5.64328849183e-05	8.80198132548607e-05	3.51379079239619e-05	6.58382242530094e-05	7.79457981781084e-05	6.08135129909972e-05	4.78710808460535e-05	4.28211018465857e-05	7.8290253772601e-05	5.725663601693e-05	5.70419004385635e-05	4.24449523073203e-05	-0.215302391777769	0.320323894279722	0.981750601540753	unchanged	--	--	--	--	--	--	--	--	--	--	--	--	--	--	--	--
pos_1178	N(6)-(Octanoyl)lysine	6.45386550613315e-06	1.28926497953856e-05	2.28749387987893e-06	7.25729573055605e-06	1.09200658830872e-05	7.27901679518629e-06	7.02222957314404e-06	4.85745675383886e-06	7.9762084661753e-06	6.24227986096052e-06	6.65840794369298e-06	4.39837109569169e-06	-0.190406757400265	0.340813113214809	0.892061003295391	unchanged	--	--	--	--	--	--	--	--	--	--	--	--	--	--	--	--
pos_1179	Lippioside I	1.95033602417343e-05	7.37538413463455e-05	2.27409180382226e-05	1.73914194839274e-05	5.37996668210903e-05	2.9456582670697e-05	2.62925735688172e-05	2.13501452315037e-05	1.6158577987881e-05	5.56373898996237e-05	2.54468697752923e-05	2.36545107024681e-05	-0.261572440880775	0.481722473984942	0.62591278936821	unchanged	--	--	--	--	--	--	--	--	--	--	--	--	--	--	--	--
pos_118	Oxindole	0.000130709892398887	0.000308579475960313	0.000210894466875224	0.000259220620083501	0.000223465762720542	0.000230581417960194	0.000249136475925548	0.000189156860074903	0.000320615130899104	0.000169249936075886	0.000270073359849918	0.000182440355888007	0.0248751923601152	0.934742962264144	0.236908870983732	unchanged	--	--	--	--	--	--	--	--	--	HMDB0061918	Organic compounds	Organoheterocyclic compounds	Indoles and derivatives	Indolines	321710	59-48-3
pos_1180	Ustiloxin B	0.000326569621825361	0.000320636273840527	3.22435747774862e-07	0.000112274177783131	0.000376152762860401	0.000211077003869773	8.73226451032093e-07	2.672021042301e-07	1.41789851109209e-06	0.000134511448926682	1.23058559592231e-05	8.35321758639335e-07	-4.88222659615547	0.0183477653817877	2.29697191702385	down	--	--	--	--	--	--	--	--	--	HMDB0041373	Organic compounds	Lipids and lipid-like molecules	Fatty Acyls	Fatty alcohols	85067000	151841-41-7
pos_1181	4-Chlorocatechol	6.38540997188843e-06	8.69797085797087e-06	8.65570836067598e-06	8.52294538719693e-06	4.75608511426741e-06	6.14793079171506e-06	6.07690300366647e-06	5.83215717024448e-06	7.93923238371409e-06	6.21727125392358e-06	6.67991868069516e-06	6.79606276683937e-06	-0.0988601554839548	0.444936360600042	0.7773053130421	unchanged	C02375	Metabolic pathways(ko01100)	--	--	--	--	--	--	--	--	--	--	--	--	--	--
pos_1182	Methyl 1-(1-propenylthio)propyl disulfide	2.77438995365808e-05	3.25796969452639e-05	2.74541075018535e-05	2.24844143861157e-05	1.69917414841016e-05	1.43306927991166e-05	1.70329367851055e-05	1.4954831019804e-05	2.24233712535002e-05	1.70308439652936e-05	1.40731768496414e-05	1.63494054119529e-05	-0.43362583638935	0.0710118298476449	1.83551730613751	unchanged	--	--	--	--	--	--	--	--	--	--	--	--	--	--	--	--
pos_1184	3,5,7-Trihydroxy-4',6-dimethoxyflavanone	1.13147678862185e-05	1.57748100882483e-05	2.04048680462709e-05	1.53043780059665e-05	9.11228236566148e-06	1.59259234009478e-05	1.52227353247831e-05	1.37694732615305e-05	1.53986802890716e-05	1.50589009258112e-05	1.55297888975934e-05	1.35170953551426e-05	0.0558331274685244	0.949354348218273	0.178897740062056	unchanged	--	--	--	--	--	--	--	--	--	--	--	--	--	--	--	--
pos_1185	(S,E)-Zearalenone	1.17628972188077e-05	1.92279821489656e-05	7.20876206235966e-06	1.14806579224712e-05	1.18727614289545e-05	1.0376791696216e-05	1.08712267400451e-05	9.59396101548244e-06	1.42061362744709e-05	1.67203906021446e-05	1.27584214581746e-05	1.18838231391143e-05	0.117298223366905	0.729933887274335	0.431504735650543	unchanged	--	--	--	--	--	--	--	--	--	--	--	--	--	--	--	--
pos_1186	4-Coumaroyl-2-hydroxyputrescine	1.00344915669112e-06	2.63674617260979e-06	6.22450561546419e-06	6.27908554981337e-07	1.30758658211719e-06	2.34725421440534e-06	2.94223909325942e-07	2.38639173595499e-06	1.00435315318265e-07	9.78752525127604e-06	2.54187670002325e-06	9.23976695593568e-06	-0.161556992187826	0.414533849742537	0.839585124923562	unchanged	--	--	--	--	--	--	--	--	--	--	--	--	--	--	--	--
pos_1187	Rutalinium	0.000209110797246378	0.00023994826332225	0.000228895965686212	0.000251404330226527	0.000206351446990471	0.000341816885626828	0.000233039266567345	0.000273994051316073	0.000208454926273643	0.000281855018191014	0.000297194034140286	0.000213472305723146	0.0374734577724229	0.846825117975485	0.316410850430689	unchanged	--	--	--	--	--	--	--	--	--	--	--	--	--	--	--	--
pos_1188	N,O-Didesmethyltramadol	5.05307675124353e-05	5.05385497845603e-05	4.47738218199831e-05	4.6064129759449e-05	4.62093873094232e-05	4.72180022372575e-05	4.90635570364796e-05	4.45403396135036e-05	4.16330713943557e-05	4.55929806076963e-05	4.52721231546013e-05	4.00798112833955e-05	-0.101760626271625	0.0808900118163155	1.61239527556382	unchanged	--	--	--	--	--	--	--	--	--	--	--	--	--	--	--	--
pos_1189	3-Hydroxy-1-phenyl-1-heptadecanone	1.43709706159502e-05	2.99164123466321e-05	1.8655299851253e-07	7.79187537300014e-06	6.90046832370286e-06	8.28628871433116e-06	1.63979051229e-05	1.26588388217618e-05	1.16578047795421e-05	3.67745873409417e-05	1.50433487612291e-05	6.16439834750084e-06	1.30856482097093	0.405492892385153	0.915523349302022	unchanged	--	--	--	--	--	--	--	--	--	--	--	--	--	--	--	--
pos_119	3,4-Dihydrocadalene	0.000172409947216234	0.000218346483538432	0.000213456325755737	0.000205149213162387	0.000166700000050388	0.000191979470120804	0.000182252058374789	0.000209132322269042	0.000189263163250823	0.000205295982412063	0.000203765423415896	0.000214618573468933	0.0493085675531173	0.566804660957949	0.67049059993297	unchanged	--	--	--	--	--	--	--	--	--	--	--	--	--	--	--	--
pos_1190	Isopersin	9.57324346709939e-05	0.000133461397572635	0.000193619274485094	0.000166142525401075	0.000108525518552379	0.000152496727479017	0.000103005353129861	0.000144251672416413	0.000108879503595463	0.000106423070163992	0.000138590192841285	0.000216237920605999	-0.0664438982924569	0.818375288495367	0.197127772920174	unchanged	--	--	LMFA05000670	Isopersin	(12Z,15Z)-1-hydroxy-4-oxohenicosa-12,15-dien-2-yl acetate	-	Fatty Acyls [FA]	Fatty alcohols [FA05]	-	--	--	--	--	--	--	--
pos_1191	4alpha-Carboxy-5alpha-cholesta-8-en-3beta-ol	8.81785420039309e-07	1.03716539760797e-07	0	3.87049556188928e-05	2.49318155527821e-07	6.20085336290039e-06	1.37063108238134e-07	3.83447972477814e-08	6.45426134157477e-07	3.3606831067074e-05	4.12452507045952e-06	7.18416541189985e-08	2.48816006263366	0.883475967968845	0.264209386553922	unchanged	--	--	LMST01010228	-	4alpha-carboxy-5alpha-cholesta-8-en-3beta-ol	-	Sterol Lipids [ST]	Sterols [ST01]	Cholesterol and derivatives [ST0101]	--	--	--	--	--	--	--
pos_1192	Phenazopyridine	1.75416392364577e-06	1.65518518203319e-06	6.77295444204834e-06	1.43413837309896e-05	3.79053709347649e-06	4.92323055837557e-06	2.4996315331831e-06	5.64335818124763e-06	1.38705541171489e-06	4.9162578972551e-06	5.62579401867548e-06	1.38089649954442e-05	0.0842939992246947	0.968239652622973	0.0189023627076928	unchanged	--	--	--	--	--	--	--	--	--	--	--	--	--	--	--	--
pos_1193	Glabrene	1.25755117577039e-05	4.06400340502843e-07	6.56302637897225e-06	7.28933145519653e-07	9.75408685702034e-06	4.09114880872701e-06	1.28377994319121e-05	8.48222617949732e-06	9.17425573205258e-06	3.63963447847239e-06	1.19606263383936e-05	1.98381796981374e-06	1.07773386039035	0.406148194043227	0.761595397666269	unchanged	--	--	LMPK12080060	Glabrene	-	-	Polyketides [PK]	Flavonoids [PK12]	Isoflavans [PK1208]	HMDB0029530	Organic compounds	Phenylpropanoids and polyketides	Isoflavonoids	Pyranoisoflavonoids	480774	60008-03-9
pos_1194	ADP-ribose 1"-2" cyclic phosphate	9.47372036539313e-05	2.09013595582538e-05	2.33542062997844e-05	1.91717627562723e-05	4.90033873844317e-05	5.05083582002249e-05	4.82276989306768e-05	3.89726485320359e-05	2.87549541575747e-05	3.44207169622916e-05	3.75874967197057e-05	3.65917280815506e-05	0.0369308529329242	0.666545485716845	0.530282161666406	unchanged	--	--	--	--	--	--	--	--	--	--	--	--	--	--	--	--
pos_1195	3-Succinoylpyridine	8.00925281493265e-05	0.0001067172431558	3.92127875513909e-05	6.54323086112259e-05	8.14291686934893e-05	6.93814690118712e-05	5.23491349460536e-05	4.49385213106939e-05	7.70511486578844e-05	6.9921780486347e-05	6.31206987376127e-05	4.17883327700698e-05	-0.314987063566541	0.184668230299426	1.30630886352404	unchanged	C19569	Chemical carcinogenesis(ko05204);;Metabolism of xenobiotics by cytochrome P450(ko00980);;Nicotinate and nicotinamide metabolism(ko00760);;Metabolic pathways(ko01100)	--	--	--	--	--	--	--	HMDB0000992	Organic compounds	Organic acids and derivatives	Keto acids and derivatives	Gamma-keto acids and derivatives	437	4192-31-8
pos_1196	Cytochalasin Npho	0.00406042275329915	0.00157601417443791	0.00139526583965853	0.00127620455586174	0.00260934140790528	0.0026356874584959	0.00277889593437475	0.00206120868087667	0.00190879026492888	0.00201911150101793	0.00210499278755635	0.00208677787088566	0.051216465653674	0.834876862089392	0.245956648819306	unchanged	--	--	--	--	--	--	--	--	--	--	--	--	--	--	--	--
pos_1197	2-Stearyl citrate	0.0106368884850162	0.0105518052526958	0.0106950825080261	0.00932097206661127	0.00857811032230362	0.0101455526405621	0.0095803801950581	0.0101783383448625	0.0103758643356988	0.00906968688086284	0.00990403147157265	0.00970424927119713	-0.0238093069356164	0.653955732638002	0.414316989601181	unchanged	--	--	--	--	--	--	--	--	--	--	--	--	--	--	--	--
pos_1198	all-trans-3,4-Didehydroretinoate	0.000342272827744288	0.00024376518502065	0.000912872532294292	4.81850012599377e-05	0.000242465521814707	0.000308732795691025	2.04362796491063e-05	0.000192720483159707	3.78574891814208e-05	0.00129861022025365	0.000271073742372919	0.000520793153117441	-0.554864871737296	0.864424978958199	0.0938926578524508	unchanged	--	--	--	--	--	--	--	--	--	--	--	--	--	--	--	--
pos_1199	Antibiotic GR 95647X	6.25878855365323e-05	5.31058372403036e-05	5.64170580083998e-05	4.6141516747142e-05	4.96084790559978e-05	5.42254927266013e-05	5.56158816511819e-05	4.9690102763663e-05	5.61910413396207e-05	5.27975018922765e-05	5.10688115475977e-05	5.16844207757809e-05	-0.0175119201869212	0.751037795086807	0.319051333463557	unchanged	--	--	--	--	--	--	--	--	--	--	--	--	--	--	--	--
pos_12	Hypoxanthine	0.000371812854488535	0.000480574393653544	0.000353765727995651	0.000306175872046285	0.000503559273685996	0.000310580700323051	0.000378543400659467	0.000435501006544614	0.000386280193092769	0.00061293130214648	0.00035793589936024	0.000546282514999064	0.222372541334956	0.261801642751863	1.11858067128441	unchanged	C00262	Purine metabolism(ko00230);;Metabolic pathways(ko01100)	--	--	--	--	--	--	--	--	--	--	--	--	--	--
pos_120	BETAMIPRON	0.00057658384549959	0.000332279293012875	9.98167349937268e-05	0.000248114843348025	0.000324707344172667	0.000253069277176471	0.000162963529955938	0.000123274947594184	0.000123212390438883	0.000215840701637864	0.000157430254546731	8.31983989788877e-05	-0.966679551182477	0.0528481798202443	2.04574529934537	unchanged	--	--	--	--	--	--	--	--	--	--	--	--	--	--	--	--
pos_1200	Flunarizine	0.000112454196172507	0.000143897676090168	3.24825321289872e-05	0.000116206217063481	0.00010346045139021	0.000101631029279653	9.96674156560633e-05	7.39741329467523e-05	5.77624317846522e-05	0.000115717016977754	8.06384090298102e-05	9.42791056991674e-05	-0.129597381341133	0.421997319923553	0.733515190002289	unchanged	--	--	--	--	--	--	--	--	--	--	--	--	--	--	--	--
pos_1201	TG(8:0/8:0/i-17:0)	2.49406551559252e-05	1.16105382223053e-06	1.36651848285784e-06	8.6627879199415e-07	9.83263340990301e-06	8.12634167804689e-06	1.14496850704128e-05	8.89919146711319e-06	2.1251823969744e-06	1.8140348010319e-06	5.05142442534705e-06	5.43970853663058e-06	0.329744038100976	0.654406159665474	0.537136185743255	unchanged	--	--	--	--	--	--	--	--	--	HMDB0071439	Organic compounds	Lipids and lipid-like molecules	Glycerolipids	Triradylcglycerols	131778244	_
pos_1202	Musanolone D	4.58651798769956e-05	6.43882268553837e-05	6.19882652972679e-05	5.43414876849152e-05	4.59770147057022e-05	5.08335504653149e-05	5.51398458625842e-05	5.39381544496468e-05	6.17879773022642e-05	4.41009999140548e-05	5.28947931271143e-05	5.47872466502316e-05	0.00242758582806779	0.975761338938259	0.117170453507711	unchanged	--	--	--	--	--	--	--	--	--	--	--	--	--	--	--	--
pos_1203	2,2,4-Trimethyl-1,3-pentadienol diisobutyrate	2.11339601041437e-05	2.47872019802938e-05	2.64119332214224e-05	2.05151027219585e-05	1.90025810602068e-05	2.23510862224258e-05	1.80913438146229e-05	2.17193507340687e-05	1.96867786161383e-05	2.61026812283933e-05	2.11896698499266e-05	2.17461099646628e-05	-0.0622918489242874	0.562992259062426	0.608361808954408	unchanged	--	--	--	--	--	--	--	--	--	--	--	--	--	--	--	--
pos_1204	Androsterone	1.72244956987785e-05	1.77801948055602e-05	1.81616907916737e-05	1.71872965971099e-05	1.46376610766885e-05	1.7658859978177e-05	1.69863165196673e-05	1.76414911637018e-05	1.59793806380109e-05	2.00138942751765e-05	1.82490370048613e-05	1.70243635171296e-05	0.044821476711526	0.495961048012389	0.721727961280085	unchanged	C00523	Steroid hormone biosynthesis(ko00140)	LMST02020001	Androsterone	3alpha-hydroxy-5alpha-androstan-17-one	Androsterone	Sterol Lipids [ST]	Steroids [ST02]	C19 steroids (androgens) and derivatives [ST0202]	HMDB0000031	Organic compounds	Lipids and lipid-like molecules	Steroids and steroid derivatives	Androstane steroids	5879	53-41-8
pos_1206	2-hydroxymethylolanzapine	7.27064369007252e-06	1.42939610549604e-05	1.24884891290246e-05	1.17328990151361e-05	8.9749711747386e-06	1.04669160986437e-05	9.66996525850471e-06	1.17467942485928e-05	1.22896722389786e-05	1.04929347351666e-05	1.12422895067308e-05	1.01098258739133e-05	0.0364789194648409	0.962642911951071	0.155537405651061	unchanged	--	--	--	--	--	--	--	--	--	--	--	--	--	--	--	--
pos_1207	PC(18:4(6Z,9Z,12Z,15Z)/22:6(4Z,7Z,10Z,13Z,16Z,19Z))	0.0378001120221765	0.0164226100707242	0.0159910134296621	0.0139827933719229	0.0188551984654582	0.0198098868938308	0.020713899892171	0.0180980567695413	0.0185195088653322	0.0165624036232202	0.0178380463850451	0.0176888317465008	-0.0858304344768008	0.561068016520863	0.710004500489133	unchanged	--	--	LMGP01011730	PC(18:4(6Z,9Z,12Z,15Z)/22:6(4Z,7Z,10Z,13Z,16Z,19Z))	1-(6Z,9Z,12Z,15Z-octadecatetraenoyl)-2-(4Z,7Z,10Z,13Z,16Z,19Z-docosahexaenoyl)-glycero-3-phosphocholine	PC(40:10); PC(18:4_22:6)	Glycerophospholipids [GP]	Glycerophosphocholines [GP01]	Diacylglycerophosphocholines [GP0101]	HMDB0008255	Organic compounds	Lipids and lipid-like molecules	Glycerophospholipids	Glycerophosphocholines	52922939	_
pos_1208	Cucurbitacin I 2-glucoside	8.11568059747142e-06	3.82331506179012e-06	3.28052832232762e-06	1.52479123979369e-06	5.02321649782053e-06	4.81251205191058e-06	6.43588399893152e-06	4.59287671018415e-06	5.0220265463621e-06	3.98641552458347e-06	5.02746874715059e-06	4.78667827729612e-06	0.320712913844098	0.588712000045584	0.588264562976478	unchanged	--	--	--	--	--	--	--	--	--	--	--	--	--	--	--	--
pos_1209	(1S,2R,4R,8S)-p-Menthane-2,8,9-triol 9-glucoside	0	0	0	3.75332484477294e-06	0	2.65766938136049e-07	2.43383066350026e-06	1.277622722622e-06	0	2.11825078987818e-05	2.30164018934591e-06	0	8.63091364586143	0.306173618931099	1.0142362463179	unchanged	--	--	--	--	--	--	--	--	--	--	--	--	--	--	--	--
pos_1210	Alloxanthin	0.0239125187953439	0.0405514462783118	0.0270830576579331	0.0273565230349164	0.0355509159582051	0.0305591326157406	0.0223420201161471	0.0272499275170894	0.0292650871941349	0.0356308210430733	0.029650640811362	0.0278621244798936	-0.0955997360773599	0.498341999904117	0.651177948599503	unchanged	--	--	--	--	--	--	--	--	--	HMDB0036874	Organic compounds	Lipids and lipid-like molecules	Prenol lipids	Diterpenoids	12305997	28380-31-6
pos_1211	(3E,5E)-2,6-Dimethyl-1,3,5,7-octatetraene	0.000174104116468933	0.00018838323546873	0.000263373137876945	0.000148265007912193	0.000182920841111364	0.000180727647742911	0.000130210238128672	0.00016851742195176	0.000140426444223453	0.000284654561680296	0.000176789562073087	0.000226592456305404	-0.0448405847250317	0.952133465124439	0.132990810752889	unchanged	--	--	--	--	--	--	--	--	--	--	--	--	--	--	--	--
pos_1212	Arachidonoyl Serinol	0.000974146211597171	0.000897064246290581	0.0007955980938466	0.00105349856170596	0.000729536475570372	0.00087132241235236	0.000953318817376734	0.000872557944304068	0.000634693927605113	0.000967605372137651	0.00085394081881542	0.000796117564478134	-0.0704809245754543	0.570627620187136	0.581434155030118	unchanged	--	--	--	--	--	--	--	--	--	--	--	--	--	--	--	--
pos_1213	Phytosulfokine a	6.65758865645494e-05	7.55310277230213e-06	1.09730462532556e-05	7.58957807217e-06	2.7035266764841e-05	3.20194893393443e-05	3.19235002208992e-05	1.85366289893347e-05	9.76800080897671e-06	1.69228323206997e-05	1.41911726151981e-05	2.09806494500525e-05	-0.0526387447628611	0.526339924812969	0.712851889218583	unchanged	--	--	--	--	--	--	--	--	--	--	--	--	--	--	--	--
pos_1214	Methyl (R)-9-hydroxy-10-undecene-5,7-diynoate glucoside	0.000173130060294408	0.000218991172164207	9.0619762672661e-05	0.000162022083114365	0.000158496245686544	0.000149530729216108	0.000192661565698242	0.000153493436200468	0.00014649869225184	0.000175564771023193	0.000160053877145915	0.000137084353207465	0.0565084613424176	0.91440615501495	0.251200010567671	unchanged	--	--	--	--	--	--	--	--	--	--	--	--	--	--	--	--
pos_1215	O-Ureidohomoserine	2.74519273968644e-05	7.04107748450474e-05	2.84497431000411e-05	3.70599448406702e-05	5.38278588346377e-05	4.15665899158852e-05	3.8332004161351e-05	3.42311612210816e-05	6.25842827402732e-05	3.75165500771201e-05	4.07142522472441e-05	2.87006512446362e-05	-0.056825476322194	0.743576141606749	0.221526845820868	unchanged	--	--	--	--	--	--	--	--	--	HMDB0012271	Organic compounds	Organic acids and derivatives	Carboxylic acids and derivatives	Amino acids, peptides, and analogues	21126175	51767-67-0
pos_1216	3-Allyl-1-cyclohexene	1.03229778062465e-05	1.27569989535509e-05	2.21793283612695e-05	7.5466516699437e-06	1.18876614731386e-05	1.37762793985493e-05	5.63351898581675e-06	1.21198431968689e-05	5.84035204632501e-06	3.78569810483843e-05	1.22161202863824e-05	2.22299291596516e-05	0.0305886274476777	0.609323418650243	0.486933295185886	unchanged	--	--	--	--	--	--	--	--	--	--	--	--	--	--	--	--
pos_1217	3,5,5-Trimethyl-2-cyclohexen-1-one	9.06395076807128e-06	1.29118750872189e-05	1.1952858368598e-05	9.92857915432556e-06	7.60104666030503e-06	9.03246116885924e-06	9.07406107505502e-06	1.07364661622379e-05	1.10881490077738e-05	8.94566019761052e-06	9.61923895050197e-06	9.34733912384253e-06	-0.022357689182396	0.76275594635442	0.247976067236849	unchanged	--	--	--	--	--	--	--	--	--	--	--	--	--	--	--	--
pos_1218	Cholesta-4,6-dien-3-one	0.0013244722464755	0.00101217075441263	0.0030907150975056	0.00344519819936599	0.00155186871121292	0.00211085677247863	0.00278587040486815	0.00300522327453124	0.00157508736788115	0.00186318225228101	0.00263259129534245	0.00326796412218832	0.362740588166877	0.397132979714068	0.857483965552516	unchanged	--	--	LMST01010059	4,6-cholestadienone	cholesta-4,6-dien-3-one	-	Sterol Lipids [ST]	Sterols [ST01]	Cholesterol and derivatives [ST0101]	--	--	--	--	--	--	--
pos_1219	2,4,7-Decatrienoic acid	2.81979153729803e-05	3.33497938078675e-05	2.74329525883606e-05	3.18827628577893e-05	2.51890096943184e-05	2.86816528686418e-05	2.93098359927693e-05	2.80298111615228e-05	2.97578288067171e-05	2.80732762260975e-05	2.83205081829568e-05	2.7547815663624e-05	-0.0250461287634227	0.645723127269493	0.343665339533405	unchanged	--	--	LMFA01030962	2,4,7-Decatrienoic acid	(2E,4E,7E)-deca-2,4,7-trienoic acid	-	Fatty Acyls [FA]	Fatty Acids and Conjugates [FA01]	Unsaturated fatty acids [FA0103]	--	--	--	--	--	--	--
pos_122	3α,12α-Dihydroxy-5β-chola-7,14-dien-24-oic Acid	0.000744432693421582	0.00139284137338049	0.000722670538416346	0.000995175229361018	0.000849109847668764	0.000633091498444832	0.00225033079697748	0.00260738071814385	0.000779218126890647	0.000844113838468565	0.000722707450698383	0.000538536275679211	0.317626714953747	0.335189950505579	1.11082151123834	unchanged	--	--	--	--	--	--	--	--	--	--	--	--	--	--	--	--
pos_1220	Vignatic acid A	9.50233074890048e-05	8.01644476988885e-05	7.96064822127622e-05	6.58081309963895e-05	6.8175518591291e-05	8.06016540686159e-05	7.8214088094193e-05	8.1280591453114e-05	8.19658227193692e-05	7.50767370477914e-05	7.89732302249451e-05	7.31707755972831e-05	0.00731668611006953	0.980203619987349	0.030907617605517	unchanged	--	--	--	--	--	--	--	--	--	--	--	--	--	--	--	--
pos_1221	Lucuminoside	1.01553565482658e-05	1.53394458821668e-05	6.15877895837802e-06	2.86560387778068e-05	1.3040520144071e-05	1.51902160413273e-05	4.02188171482553e-06	9.81160848460546e-06	4.44356795723264e-05	1.44792622841412e-05	1.61918532730549e-05	1.50952640470213e-05	0.0313980633925013	0.702659620971706	0.328198485541465	unchanged	--	--	--	--	--	--	--	--	--	--	--	--	--	--	--	--
pos_1224	Dimethyl fukiic acid	5.27584751086724e-05	8.67553092461363e-05	0.000179171679732794	5.33862509010606e-05	5.49310325729846e-05	8.03897269121016e-05	5.08409899363779e-05	0.000259250259446479	0.000253270141258379	6.49422172520781e-05	0.000124165948086115	8.06833479466078e-05	0.581628263197439	0.247540677778193	1.11706801383006	unchanged	--	--	--	--	--	--	--	--	--	--	--	--	--	--	--	--
pos_1225	Tiapride	3.78911852012375e-05	3.55184979874749e-05	1.63597721319554e-05	3.02066592455512e-05	2.41401546664236e-05	2.68081211699761e-05	2.23310982261632e-05	1.98454065279401e-05	1.98482433498423e-05	3.83834962538582e-05	2.4988203840938e-05	1.89258918608982e-05	-0.238431982378509	0.337362562056248	1.01947508898375	unchanged	--	--	--	--	--	--	--	--	--	--	--	--	--	--	--	--
pos_1226	13-Demethyl tacrolimus	0.000202744528461997	5.30335711597023e-05	4.41139432231638e-05	4.29135181213593e-05	0.000113511631796722	0.000106607764333562	9.97647295786356e-05	8.38144433249028e-05	6.27210466527866e-05	7.28238024527418e-05	7.90986978772711e-05	7.20415973555153e-05	-0.0297666941490959	0.573372765277052	0.67440245421204	unchanged	--	--	--	--	--	--	--	--	--	--	--	--	--	--	--	--
pos_1227	Pollenin B	1.06856288332028e-05	1.71666484385848e-06	2.61211180807269e-06	8.55877555583779e-07	5.77012854597569e-06	5.26667509018376e-06	4.94650955083144e-06	3.87507241039423e-06	2.47527174518631e-06	3.2821512736514e-06	3.98962960217833e-06	4.45883495507905e-06	0.192064533309683	0.685489264275231	0.500973475068499	unchanged	--	--	--	--	--	--	--	--	--	--	--	--	--	--	--	--
pos_1229	N-di-Demethyl roxithromycin	0.00011626163242678	8.96932270458001e-05	8.28434829739223e-05	0.000159788714577956	7.94082742365563e-05	0.000111318842078631	9.29557447745144e-05	9.50736826332742e-05	7.96341443515625e-05	8.70293348552678e-05	8.95858180071673e-05	8.79386341226224e-05	-0.223075468433889	0.208941408597585	1.38834659782057	unchanged	--	--	--	--	--	--	--	--	--	--	--	--	--	--	--	--
pos_123	6,10,14-Trimethyl-5,9,13-pentadecatrien-2-one	0.000190584419882656	0.000159050504757414	0.000182537599705521	0.000190368100470689	0.00020454182101673	0.000184398375635752	0.000175888180242607	0.000187204361390829	0.000215858044604718	0.000160739511055567	0.000204973018838231	0.000188679522573335	0.0255549276181135	0.726804984876797	0.198378704871233	unchanged	--	--	--	--	--	--	--	--	--	--	--	--	--	--	--	--
pos_1230	gamma-Chaconine	0.000544332669163716	0.00048888523869062	0.00123449028547808	0.000833169182637674	0.000731794950336345	0.000711933429856529	0.000807697844768544	0.000955490214295763	0.000495654859072989	0.000679472192115623	0.00075435746246056	0.0011473890281302	0.109619814143137	0.736662801984333	0.327942517284361	unchanged	--	--	--	--	--	--	--	--	--	HMDB0033678	Organic compounds	Lipids and lipid-like molecules	Steroids and steroid derivatives	Steroidal glycosides	12302826	511-36-4
pos_1231	12-Oxo-2,3-dinor-10,15-phytodienoic acid	0.000220156950249646	0.000398043036262886	0.000416473022537625	0.000386962631947701	0.00025290209752821	0.000330516098883709	0.000268364909778666	0.000321418311142168	0.000320091196143625	0.000294081695065719	0.000326569134706138	0.000378037478442783	-0.0393179667694028	0.672967934184629	0.354426687848013	unchanged	--	--	--	--	--	--	--	--	--	--	--	--	--	--	--	--
pos_1232	Quinoside A	0.000322283979409195	0.000294701936119664	0.000355528523281453	0.000317141597524994	0.000200430616309999	0.000309679760145413	0.000170442562183947	0.000271309761480326	0.000236198165949944	0.000434100889349508	0.000299512882663672	0.000508900733877194	0.0201159387083845	0.731496515064462	0.311942013614261	unchanged	--	--	--	--	--	--	--	--	--	--	--	--	--	--	--	--
pos_1233	Ganglioside GM3 (d18:0/12:0)	5.28336628936216e-06	1.33146093109919e-05	1.63112533106235e-05	5.35495370896571e-06	7.9214646979517e-06	6.94377845767474e-06	8.31791640188218e-06	1.25314541666141e-05	6.18527830170169e-06	1.05352337359554e-06	7.03260740957289e-06	1.77978414849392e-05	-0.331849764334017	0.90470291626027	0.0163570486535622	unchanged	--	--	--	--	--	--	--	--	--	--	--	--	--	--	--	--
pos_1234	Varanic acid	1.73854149123221e-05	1.19095146915479e-05	9.52028845998836e-06	5.21041799458749e-06	5.79391805090507e-06	8.73075507730343e-06	1.14667854592764e-05	6.61069281763903e-05	1.00965430419372e-05	1.04807385877206e-05	3.89463068118819e-05	0.000112365518768835	1.56669140754191	0.11738520285099	1.66035547827773	unchanged	--	--	LMST04030067	Varanic acid	3alpha,7alpha,12alpha,24-Tetrahydroxy-5beta-cholestan-26-oic acid	-	Sterol Lipids [ST]	Bile acids and derivatives [ST04]	C27 bile acids, alcohols, and derivatives [ST0403]	--	--	--	--	--	--	--
pos_1235	Cotinine glucuronide	1.48589202007149e-05	2.51138674708265e-05	5.19243094708861e-06	6.59816951931783e-06	2.99263188442984e-06	2.12948806554525e-06	1.07236752037211e-05	8.29178257943762e-06	5.80004288174907e-06	3.84968938332281e-06	6.06622203928355e-06	3.74240681996325e-06	-0.142347833753213	0.450270610071447	0.69736314436933	unchanged	--	--	--	--	--	--	--	--	--	--	--	--	--	--	--	--
pos_1236	2-Amino-4-hydroxy-6-pteridinecarboxylic acid	7.95920540193564e-06	8.56464444417682e-06	8.91338995645133e-06	7.80364086874883e-06	8.21813897199378e-06	8.501382455938e-06	9.27591399812564e-06	7.25767990051907e-06	8.11135437315039e-06	7.49642118966452e-06	9.21918174995967e-06	6.56191653586186e-06	-0.0699583167611699	0.502310734760777	0.592276804850916	unchanged	--	--	--	--	--	--	--	--	--	--	--	--	--	--	--	--
pos_1237	Steviobioside	0.000393428503509828	0.00025214182307183	0.000317343727321993	0.000102802382292668	0.000196254986737796	0.00027269653254057	0.000187919416181553	0.000450486977041453	0.000285271270746657	0.000156338379220311	0.000357088945347356	0.000993366671710627	0.491822197790006	0.301367028473059	1.10756089081989	unchanged	--	--	--	--	--	--	--	--	--	HMDB0036707	Organic compounds	Lipids and lipid-like molecules	Prenol lipids	Terpene glycosides	16401639	41093-60-1
pos_1238	Torachrysone 8-(2-apiosylglucoside)	4.19309673041866e-06	3.21051517948193e-05	1.83742709214116e-06	1.69307114441672e-06	3.03516425763923e-06	1.2256680007008e-05	3.4574583835064e-05	1.11726822252722e-05	1.24676754001095e-05	7.48027749232234e-06	1.43071542890101e-05	1.22908408500751e-05	1.44459717060927	0.346558672407022	1.27613294213448	unchanged	--	--	--	--	--	--	--	--	--	--	--	--	--	--	--	--
pos_1239	L-alpha-Amino-1H-pyrrole-1-hexanoic acid	0.000169233132300719	9.19641506547501e-05	8.15113326120257e-05	8.19472131736676e-05	0.000109737777972239	0.000113494722942454	0.000121233551072285	0.000102509420748998	9.64479420710925e-05	8.97231374633736e-05	0.000100172514318797	0.000103303048265132	-0.0363984967573643	0.697840576284192	0.440209121700172	unchanged	--	--	--	--	--	--	--	--	--	--	--	--	--	--	--	--
pos_124	Ergosta-5,7,22,24(28)-tetraen-3β-ol	0.000944136509828013	0.00100425267069513	0.000783231133227658	0.00118552052240655	0.00102718376732819	0.00103434031270918	0.000720395503365171	0.000968004232060847	0.00104673468587717	0.000934298921256409	0.00104092664270014	0.00111229433981143	-0.0407367161183636	0.744832262031116	0.424946582546332	unchanged	--	--	--	--	--	--	--	--	--	--	--	--	--	--	--	--
pos_1240	Penicillamine	3.88967345830555e-06	1.33615726966181e-05	3.41981749968606e-06	1.11241757334634e-05	3.21594093460237e-06	6.34202507584265e-06	2.01979521015085e-05	1.09491604923756e-05	1.81877034261182e-06	6.91936609180835e-05	2.40757810065867e-05	2.52476504513961e-06	0.898446553967215	0.216509784583913	1.28742400030627	unchanged	--	--	--	--	--	--	--	--	--	--	--	--	--	--	--	--
pos_1241	Acarbose	6.40474668878078e-06	5.4275043755997e-06	1.77381825455426e-06	1.23599381832875e-06	4.43892150244346e-06	3.17792738853481e-06	3.97999287191784e-06	2.99268812382905e-06	2.48061825677569e-06	3.057057835594e-06	2.45960383250038e-06	2.99997305126388e-06	-0.114971451863955	0.42150977354582	0.796978606297972	unchanged	C06802	Metabolic pathways(ko01100)	--	--	--	--	--	--	--	HMDB0014429	Organic compounds	Organic oxygen compounds	Organooxygen compounds	Carbohydrates and carbohydrate conjugates	441184	56180-94-0
pos_1242	Amrinone	0.000253729221796327	0.000304215273023664	0.000270527076890444	0.000217691027623626	0.000343679019204951	0.00023504715892137	0.000349623906650789	0.000317875510526501	0.000301414835293382	0.000346407012910035	0.000277764968648351	0.000626951107535811	0.410042106101841	0.124114699757302	1.65178441918596	unchanged	--	--	--	--	--	--	--	--	--	--	--	--	--	--	--	--
pos_1244	L-Threoneopterin	5.13335975554487e-05	7.05472930812631e-05	3.01405139716053e-05	4.2648790810515e-05	4.55448718442607e-05	5.08441724792163e-05	4.42019113522735e-05	3.53512036245618e-05	6.89212176761567e-05	6.7455348391231e-05	5.05690135460079e-05	2.79203489917398e-05	-0.0119590461958836	0.950040004032831	0.111007469059438	unchanged	--	--	--	--	--	--	--	--	--	--	--	--	--	--	--	--
pos_1246	beta-D-Galactopyranosyl-(1->4)-2-amino-2-deoxy-beta-D-glucopyranosyl-(1->6)-D-mannose	2.02898459363018e-06	1.24725359196909e-05	2.26931379182282e-07	1.58372526623925e-06	1.61974438810895e-05	4.96464669913431e-06	0	4.0953178913026e-07	6.47739268287377e-06	5.48207896692395e-06	9.91258494617116e-07	1.07475362888202e-06	-4.63830306894392	0.230404045008676	1.21454807506375	unchanged	--	--	--	--	--	--	--	--	--	--	--	--	--	--	--	--
pos_1247	PE(18:3(6Z,9Z,12Z)/22:5(4Z,7Z,10Z,13Z,16Z))	1.88218697838874e-05	1.89444217785478e-05	2.28515494341957e-05	3.52157024132453e-05	9.99833150662132e-06	1.59698526925857e-05	2.15698022564588e-05	2.24014864392668e-05	2.390673330215e-05	4.58808658390273e-06	6.08334434442515e-06	7.99450142967156e-06	-0.691966448572408	0.273212773390595	1.12350167029272	unchanged	--	--	--	--	--	--	--	--	--	HMDB0009142	Organic compounds	Lipids and lipid-like molecules	Glycerophospholipids	Glycerophosphoethanolamines	53479677	_
pos_1248	Cerebroside B	7.27937688743303e-06	1.91119367320607e-06	2.80738716624481e-06	1.07254822091939e-06	2.09961928551289e-06	5.61763743287234e-06	0	8.4742868203384e-07	1.09353927396022e-06	0	9.35717321816451e-07	2.08240165138295e-06	-8.77230315488751	0.0446680502600719	2.03886743215265	down	--	--	LMSP05010133	Cerebroside B	N-(2-hydroxy-hexadecanoyl)-1-beta-glucosyl-9-methyl-sphinga-4E,8E-dienine	-	Sphingolipids [SP]	Neutral glycosphingolipids [SP05]	Simple Glc series [SP0501]	HMDB0035990	Organic compounds	Lipids and lipid-like molecules	Sphingolipids	Glycosphingolipids	10010147	88642-46-0
pos_1249	Quinquenoside III	2.62968983836385e-06	4.41150192560898e-06	5.63090614321353e-06	3.6449387498287e-06	4.97797653238683e-06	5.72121314580859e-06	6.67223761888877e-06	5.65853649207721e-06	5.45775415226494e-06	7.24801579382881e-06	8.55070703871328e-06	5.15841637454096e-06	0.546693388008443	0.0220401459770514	2.17887961209206	up	--	--	--	--	--	--	--	--	--	--	--	--	--	--	--	--
pos_125	1-Anilino-9,10-dioxo-2-anthroic acid	0.000256160134123388	4.71827098438621e-05	0.000107154097990112	6.47918688738566e-05	4.99470015802263e-05	0.000106359715257182	0.000345987530630575	0.000121471365390295	0.000106020523426411	0.000120251929709865	0.000167803291459831	0.00056741406962414	1.13975720154249	0.149877666768399	1.56050638314028	unchanged	--	--	--	--	--	--	--	--	--	--	--	--	--	--	--	--
pos_1250	Valyl-Threonine	1.75440657145956e-05	1.58229605070514e-05	1.57547045522289e-05	2.70927339743539e-05	2.08618820619726e-05	1.83695402777165e-05	2.54804544408265e-05	1.91631539647252e-05	1.7347378926386e-05	2.00871276946789e-05	1.98629543647338e-05	1.7214925456892e-05	0.0595964951437704	0.779027246251954	0.283300798990074	unchanged	--	--	--	--	--	--	--	--	--	HMDB0029137	Organic compounds	Organic acids and derivatives	Carboxylic acids and derivatives	Amino acids, peptides, and analogues	_	72636-02-3
pos_1251	Ganoderic acid H	0.00366670270108889	0.00795256350489812	0.00235193312388676	0.00080558790094079	0.00157232206628091	0.00297783730389027	0.000502131894403779	0.00143644885750896	0.00185081996234674	0.000404693316551636	0.00133452765920286	0.00265995420577307	-1.17926415518982	0.138081039218203	1.38794682214652	unchanged	--	--	--	--	--	--	--	--	--	HMDB0035987	Organic compounds	Lipids and lipid-like molecules	Prenol lipids	Triterpenoids	73657194	98665-19-1
pos_1252	Docosahexaenoic acid	1.5328847718536e-05	2.26342887299154e-05	2.20279358418742e-05	2.71127299144234e-05	2.78413099175684e-05	2.22052798261632e-05	2.54963841426652e-05	2.6939016057046e-05	2.74253794777999e-05	2.12312140777076e-05	2.2875150758575e-05	2.42391509710697e-05	0.131935821823415	0.402122603931685	0.907108653054571	unchanged	C06429	Biosynthesis of unsaturated fatty acids(ko01040)	LMFA01031176	-	5Z,8Z,11Z,14Z,17Z,20Z-docosahexaenoic acid	Docosahexaenoic acid; C22:6n-2,5,8,11,14,17;Docosahexaenoate;5Z,8Z,11Z,14Z,17Z,20Z-docosahexaenoate	Fatty Acyls [FA]	Fatty Acids and Conjugates [FA01]	Unsaturated fatty acids [FA0103]	HMDB0002183	Organic compounds	Lipids and lipid-like molecules	Fatty Acyls	Fatty acids and conjugates	445580	6217-54-5
pos_1253	Prostaglandin H1	0.000169647263078527	6.25511942467572e-05	3.98161215471729e-05	9.55913194388082e-05	2.9482717779923e-05	7.45147774621749e-05	3.64813264297464e-05	3.74842382331219e-05	4.38547751207406e-05	0.000104016943806432	4.95499027861068e-05	4.27274932208108e-05	-0.458027051926935	0.292201545926096	1.22378029777846	unchanged	--	--	LMFA03010044	PGH1	9S,11R-epidioxy-15S-hydroxy-13E-prostaenoic acid	Prostaglandin H1	Fatty Acyls [FA]	Eicosanoids [FA03]	Prostaglandins [FA0301]	--	--	--	--	--	--	--
pos_1254	Dihydrocapsiate	1.27308079629967e-05	1.75937475465662e-05	7.77088248667844e-06	1.57463879694438e-05	8.13701466674423e-06	1.17484386679186e-05	1.19090704087284e-05	9.86866181457923e-06	1.34922485078557e-05	1.47544616130387e-05	1.32764459191864e-05	1.05227069330702e-05	0.0531742517865759	0.993080390572699	0.0816628135521337	unchanged	--	--	--	--	--	--	--	--	--	HMDB0034781	Organic compounds	Benzenoids	Phenols	Methoxyphenols	9873754	_
pos_1255	Graecunin E	1.91400038761641e-05	1.10764153517085e-05	1.0168705385975e-05	1.9067164606927e-05	1.25078357281229e-05	1.77587787598511e-05	1.62428732483834e-05	2.78702079372639e-06	7.89777717165462e-06	2.61542542847531e-05	1.04460961960309e-05	3.46135309996147e-06	-0.792522402542879	0.373491775399493	0.955165764085194	unchanged	--	--	--	--	--	--	--	--	--	--	--	--	--	--	--	--
pos_1256	Dehydrophytosphingosine	3.23917904731263e-05	3.62826334965168e-05	2.84739918096514e-05	3.68161203804869e-05	2.27113594420094e-05	3.1206626774988e-05	3.09063107300321e-05	3.22730243258409e-05	2.90639985151665e-05	2.66352475563798e-05	3.39299950177038e-05	2.70993092585127e-05	-0.0497564712065284	0.60283016086129	0.477194249011687	unchanged	--	--	LMSP01030002	Dehydrophytosphingosine	4R-hydroxysphing-8E-enine	4-hydroxy-8-sphingenine	Sphingolipids [SP]	Sphingoid bases [SP01]	4-Hydroxysphinganines (Phytosphingosines) [SP0103]	--	--	--	--	--	--	--
pos_1257	PE(20:1(11Z)/22:6(4Z,7Z,10Z,13Z,16Z,19Z))	0.00081588957918522	0.00107367541780933	0.00087665293474652	0.00136856786925809	0.00101907419198513	0.00106571321750132	0.000969433401412826	0.00092194563835079	0.00111326944175967	0.00101232113716361	0.00104588461741053	0.000860326310179975	-0.0554516809481918	0.588207316498947	0.559451317000778	unchanged	--	--	LMGP02010870	PE(20:1(11Z)/22:6(4Z,7Z,10Z,13Z,16Z,19Z))	1-(11Z-eicosenoyl)-2-(4Z,7Z,10Z,13Z,16Z,19Z-docosahexaenoyl)-glycero-3-phosphoethanolamine	PE(42:7); PE(20:1_22:6)	Glycerophospholipids [GP]	Glycerophosphoethanolamines [GP02]	Diacylglycerophosphoethanolamines [GP0201]	HMDB0009276	Organic compounds	Lipids and lipid-like molecules	Glycerophospholipids	Glycerophosphoethanolamines	52924571	_
pos_126	4-Coumaroylshikimate	3.661009436374e-05	4.23581233202253e-05	3.77713135933783e-05	4.99596228142002e-05	8.15010222561057e-05	6.14036788680704e-05	4.846166514604e-05	5.08828422860509e-05	6.2774417177857e-05	7.534938574164e-05	5.23000787907787e-05	4.41647389152784e-05	0.14657114400204	0.643827243409629	0.43450007679631	unchanged	C02947	Metabolic pathways(ko01100)	--	--	--	--	--	--	--	--	--	--	--	--	--	--
pos_1260	Vitamin A2	4.60237710142283e-05	3.8628921720046e-05	4.32311090433325e-05	4.12902427147342e-05	3.61192064790383e-05	3.98669725760947e-05	4.13617462310764e-05	4.31265979127535e-05	3.34444995108296e-05	5.88927951278319e-05	4.19093954210075e-05	4.28120903408603e-05	0.0773559159356001	0.483341239337673	0.64229845505801	unchanged	C21797	Retinol metabolism(ko00830)	--	--	--	--	--	--	--	HMDB0013117	Organic compounds	Lipids and lipid-like molecules	Prenol lipids	Retinoids	6436043	79-80-1
pos_1261	Goldinodox	7.20879649672561e-05	6.75384328557026e-05	6.46527214954552e-05	5.81546404347082e-05	5.24248681060879e-05	5.92450594857874e-05	5.77162942862406e-05	6.35000070100167e-05	6.35953373938214e-05	5.40231180282244e-05	5.78430641177295e-05	5.56837157894601e-05	-0.081230987708615	0.308588245074018	1.07828636806405	unchanged	--	--	--	--	--	--	--	--	--	--	--	--	--	--	--	--
pos_1264	1-Methylhistidine	7.08923715315909e-06	1.22489627101115e-05	2.34232010237597e-06	6.77830490939731e-06	6.5639036220524e-06	4.27929417164292e-06	6.64960586052129e-06	4.38686985335451e-06	6.82827278831093e-06	3.07660632471831e-06	6.25291595546122e-06	4.76193966816973e-06	-0.180934669001982	0.439319464412876	0.700145714198167	unchanged	C01152	Metabolic pathways(ko01100);;Histidine metabolism(ko00340)	--	--	--	--	--	--	--	HMDB0000001	Organic compounds	Organic acids and derivatives	Carboxylic acids and derivatives	Amino acids, peptides, and analogues	92105	332-80-9
pos_1265	11-Keto-beta-boswellic acid	0.0273831575505985	0.0341560532208161	0.0326151415264218	0.0281711864656317	0.0249425544199016	0.0295713171382779	0.0264078599026415	0.0294020233508656	0.0313157670455457	0.0271714701039639	0.0296890458942431	0.0283702881919584	-0.0313039709955412	0.648619599134429	0.377564230835099	unchanged	--	--	LMPR0106180008	11-Keto-beta-boswellic acid	(4R)-3alpha-hydroxy-11-oxo-urs-12-en-23-oic acid	-	Prenol Lipids [PR]	Isoprenoids [PR01]	C30 isoprenoids (triterpenes) [PR0106]	--	--	--	--	--	--	--
pos_1266	N-Methylschinifoline	0.000204886106694779	0.000380105584755001	0.000314578995703898	0.000174982708211149	0.000159505151539248	0.000217349770564892	0.000198777158643796	0.000210802988932367	0.000293733312554703	0.000403640525728823	0.000284875793930853	0.000284502880589004	0.23965380839978	0.438222724010727	0.854527711757424	unchanged	--	--	--	--	--	--	--	--	--	--	--	--	--	--	--	--
pos_1267	L-Histidine	1.93751603107188e-06	2.79186850519182e-06	3.44992897085688e-07	1.86235703023599e-06	1.35273506666863e-06	1.44177537932596e-06	1.48357559239846e-06	3.6806880823238e-07	9.22935738076064e-07	1.31433319527206e-06	1.18166544261477e-06	3.48494179041384e-07	-0.772524352968148	0.11161479035501	1.49150716599084	unchanged	C00135	Histidine metabolism(ko00340);;beta-Alanine metabolism(ko00410);;Aminoacyl-tRNA biosynthesis(ko00970);;ABC transporters(ko02010);;Metabolic pathways(ko01100);;Protein digestion and absorption(ko04974);;Biosynthesis of amino acids(ko01230);;Central carbon metabolism in cancer(ko05230)	--	--	--	--	--	--	--	HMDB0000177	Organic compounds	Organic acids and derivatives	Carboxylic acids and derivatives	Amino acids, peptides, and analogues	6274	71-00-1
pos_1268	Chondroitin D-glucuronate	0.000356204075269974	4.7764238476627e-05	6.16391443414938e-05	4.54494311437554e-05	0.000190579970578576	0.000176271335100537	0.000150480213698157	0.000124860235824254	7.05654657990971e-05	0.000106539391291202	0.00012138861774631	0.000104461596420196	0.0269601339874939	0.539243856446775	0.740515519527993	unchanged	--	--	--	--	--	--	--	--	--	--	--	--	--	--	--	--
pos_127	Parsonsine	0.000117916938390634	0.000113325431419415	0.000145030011238655	0.000195749992287513	0.000169691645531653	0.00019741420336357	0.00015427288294963	0.00018457185312733	0.000130435700537528	0.000244646794679133	0.000170608791513432	0.000168351928750424	0.173021799595457	0.405438332182533	0.811176704261553	unchanged	--	--	--	--	--	--	--	--	--	--	--	--	--	--	--	--
pos_1270	PC(14:1(9Z)/22:5(4Z,7Z,10Z,13Z,16Z))	6.87083562982464e-06	6.88064879033784e-06	1.18578102874268e-05	2.08103996091174e-06	6.1357186610487e-06	1.77380669725318e-06	2.39117913289514e-06	0	2.27158870131552e-06	1.58358658921546e-06	7.85798908996056e-07	4.35514326331569e-06	-5.1702458135805	0.0451902691522032	2.02303422188602	down	--	--	LMGP01012134	PC(14:1(9Z)/22:5(4Z,7Z,10Z,13Z,16Z))	1-(9Z-tetradecenoyl)-2-(4Z,7Z,10Z,13Z,16Z-docosapentaenoyl)-sn-glycero-3-phosphocholine	PC(36:6); PC(14:1_22:5)	Glycerophospholipids [GP]	Glycerophosphocholines [GP01]	Diacylglycerophosphocholines [GP0101]	HMDB0007923	Organic compounds	Lipids and lipid-like molecules	Glycerophospholipids	Glycerophosphocholines	53478631	_
pos_1271	DG(20:0/0:0/20:2n6)	0.000900193621821249	0.00116745479826781	0.000833253996191566	0.00122216732120617	0.000856755365326855	0.000944910345857375	0.00107780384434071	0.000909827402220409	0.000718654222522459	0.000997531381329263	0.000896447060394754	0.000536087716049343	-0.2264590063225	0.241401027438634	1.11747145243392	unchanged	--	--	--	--	--	--	--	--	--	HMDB0056075	Organic compounds	Lipids and lipid-like molecules	Fatty Acyls	Eicosanoids	131801789	_
pos_1272	Ceramide (d18:1/20:0)	0.000751036707108483	0.00100823049760102	0.000784135350974936	0.000690693543085367	0.000567946060953283	0.000519904154029455	0.000534891532301538	0.000552748751587922	0.000709057961681978	0.000578532060155003	0.000567001771730197	0.000566415241551046	-0.27273350421107	0.121335897634954	1.58391106003403	unchanged	--	--	--	--	--	--	--	--	--	--	--	--	--	--	--	--
pos_1273	20a,22b-Dihydroxycholesterol	9.57424638271329e-06	1.06413847412881e-05	1.27695428063535e-05	1.71896257814561e-05	2.4779527873667e-05	1.22797762987137e-05	1.79375259340876e-05	1.12307510319837e-05	2.3117934120808e-05	1.60948925241109e-05	1.66148210454949e-05	8.12460209772071e-06	0.095382640365429	0.76207486349572	0.234319930175837	unchanged	--	--	--	--	--	--	--	--	--	--	--	--	--	--	--	--
pos_1274	MG(22:1(13Z)/0:0/0:0)	0.00119747635924779	0.000873971346949496	0.00113406586125886	0.00114223807058921	0.000710317443318702	0.00103661141687738	0.00108420003496155	0.00115019017385554	0.000748098160269071	0.00113999403130631	0.00117894969530224	0.00123284302226703	0.105147756327531	0.499705083453301	0.652218230566723	unchanged	--	--	--	--	--	--	--	--	--	--	--	--	--	--	--	--
pos_1275	L-Histidinol	3.5920692379029e-05	4.27930356680697e-05	3.73658616619703e-05	4.66502916904127e-05	3.59764742905705e-05	3.9791922746997e-05	4.67374721615677e-05	4.3733396624098e-05	4.01329259775033e-05	3.91132912237082e-05	4.23080115509129e-05	4.15206411646782e-05	0.0925320826162999	0.258514957558467	1.31461043234168	unchanged	C00860	Histidine metabolism(ko00340);;Metabolic pathways(ko01100);;Biosynthesis of amino acids(ko01230)	--	--	--	--	--	--	--	HMDB0003431	Organic compounds	Organic nitrogen compounds	Organonitrogen compounds	Amines	165271	4836-52-6
pos_1276	PE(16:0/22:5(4Z,7Z,10Z,13Z,16Z))	0.000285125594691438	0.000264595848030734	0.000246030934667277	0.000221946702853504	0.000221865977192165	0.000259525604766046	0.000244096166113425	0.00024388291586211	0.000258774635023333	0.000236960401366221	0.000254707479628878	0.000241060963434663	-0.0136310663698342	0.771727311467462	0.24969149360672	unchanged	--	--	--	--	--	--	--	--	--	HMDB0008944	Organic compounds	Lipids and lipid-like molecules	Glycerophospholipids	Glycerophosphoethanolamines	53479589	_
pos_1277	5-Methyl-2,4-bis(3-methyl-2-butenyl)-6-(2-methyl-1-oxopropyl)-5-(4-methyl-3-pentenyl)cyclohexanone	0.00148649110231964	0.000586284274561943	0.000797197420942104	0.00131050146581341	0.000853367572472783	0.0010419288821342	0.00103441148188206	0.000918768669407387	0.000869642041822622	0.000813043866101831	0.000950793483040174	0.000943944218627365	-0.0707911883882559	0.545160125311019	0.78114411864441	unchanged	--	--	--	--	--	--	--	--	--	--	--	--	--	--	--	--
pos_1278	3,4-Dimethyl-5-pentyl-2-furanundecanoic acid	0.00013912864910182	0.000241357899995707	0.000293001622406208	0.000214838685598167	0.000284327842172399	0.000161981437337455	0.00043887199605653	0.000415742149348578	0.000274902819119204	0.000326173860451405	0.000225349364937808	0.000173076054396913	0.452080287962099	0.120776650702886	1.59233322943249	unchanged	--	--	--	--	--	--	--	--	--	--	--	--	--	--	--	--
pos_1279	Gemifloxacin	2.07181025713067e-05	2.26451275596956e-05	1.26998080314125e-05	1.76318431477406e-05	1.08790432417491e-05	1.87878993547062e-05	1.41072414543993e-05	1.17176603418483e-05	1.25403145694828e-05	1.95642575110907e-05	1.40351261882824e-05	1.25927314247665e-05	-0.26381506084476	0.190559839034381	1.24442586436207	unchanged	--	--	--	--	--	--	--	--	--	--	--	--	--	--	--	--
pos_128	1α,25-dihydroxy-26,27-dimethyl-20,21-methano-23-oxavitamin D3 / 1α,25-dihydroxy-26,27-dimethyl-20,21-methano-23-oxacholecalciferol	0.00956558682159917	0.0143297336343759	0.0102240649876713	0.0136819585983459	0.0134292719554022	0.0121394465314152	0.0160254196754113	0.0127535159539324	0.0133394586205607	0.013063516863591	0.0125514098279118	0.0106102718475036	0.100257845735555	0.456445916839667	0.943387452009849	unchanged	--	--	--	--	--	--	--	--	--	--	--	--	--	--	--	--
pos_1282	Dolichyl diphosphate	5.83022182144808e-06	9.51563599067805e-06	4.71485338449148e-06	8.93989725126179e-06	7.38134211987054e-06	6.90996158831925e-06	5.78122065302132e-06	6.53494079080158e-06	1.43259258857345e-05	7.4810495800482e-06	1.07290476746594e-05	8.04570452808457e-06	0.258521913730188	0.316719812178842	1.01692973420994	unchanged	C00621	N-Glycan biosynthesis(ko00510);;Metabolic pathways(ko01100)	LMPR03090023	dolichyl diphosphate	alpha-(3-methylbut-2-en-1-yl)-omega-(4-{[hydroxy(phosphonooxy)phosphoryl]oxy}-2-methylbutyl)poly[(2E)-2-methylbut-2-ene-1,4-diyl]	Dolichol diphosphate; Dolichol pyrophosphate; Dolichyl diphosphate; Dolichyl pyrophosphate	Prenol Lipids [PR]	Polyprenols [PR03]	Dolichol diphosphates [PR0309]	HMDB0001513	Organic compounds	Lipids and lipid-like molecules	Prenol lipids	Polyprenols	24892721	37247-98-6
pos_1283	Phenobarbital	8.30257452235671e-06	1.27933191689965e-05	6.37129067048897e-06	7.7616990525659e-06	1.08669551466249e-05	8.12195615639727e-06	8.77635691880582e-06	6.99779995028148e-06	8.52182203612567e-06	9.25632710818309e-06	8.23523900061851e-06	6.88155360595564e-06	-0.125978083830741	0.403578120627247	0.765992590448621	unchanged	--	--	--	--	--	--	--	--	--	--	--	--	--	--	--	--
pos_1284	Dacarbazine	0.000932394074494164	0.000795458295448874	0.000740531422106218	0.000675413854450315	0.000685435962281301	0.000754916321404609	0.000747979463426558	0.000752610016036701	0.000788985751756498	0.000693785258125828	0.000740091995070497	0.000723802341021184	-0.0362845854747587	0.592483315364692	0.583906303446589	unchanged	--	--	--	--	--	--	--	--	--	--	--	--	--	--	--	--
pos_1285	1-Cyano-2-hydroxy-3-butene	1.34209110384786e-06	2.10761227848343e-06	1.00605860318523e-06	1.38570542026231e-06	1.31444890643732e-06	1.14449977224226e-06	1.50426688192594e-06	1.28418589184881e-06	1.23349923185804e-06	1.3509593285567e-06	1.36035427288381e-06	2.05537806017737e-06	0.100239930648634	0.691997597766523	0.578679140726104	unchanged	--	--	--	--	--	--	--	--	--	HMDB0031339	Organic compounds	Organic oxygen compounds	Organooxygen compounds	Alcohols and polyols	91586	7451-85-6
pos_1286	L-Urobilinogen	4.26901354056363e-05	1.74527944164384e-05	1.20111010406428e-05	9.04711991661521e-06	2.61039086955695e-05	2.42298041878089e-05	2.78860717235945e-05	2.05436992850005e-05	1.83224423560462e-05	1.87617864248305e-05	1.79847804410333e-05	2.0358168331753e-05	0.0822876269703965	0.81341018599846	0.261196174554657	unchanged	C05789	Porphyrin and chlorophyll metabolism(ko00860)	--	--	--	--	--	--	--	HMDB0004157	Organic compounds	Organoheterocyclic compounds	Tetrapyrroles and derivatives	Bilirubins	9548718	17095-63-5
pos_1287	[8]-Paradol	3.15819127196942e-05	4.1703513761059e-05	2.43623133979205e-05	3.97516893156749e-05	3.94884818077197e-05	3.68199555190028e-05	3.8204416277576e-05	3.05695090883221e-05	2.64077377676559e-05	3.31674378085728e-05	3.5517573779251e-05	2.69006246779705e-05	-0.154020131578017	0.274827956655777	0.985493520480035	unchanged	--	--	--	--	--	--	--	--	--	--	--	--	--	--	--	--
pos_1288	Momordicilin	0.000298983448504834	0.000333160194702935	0.000922010839103759	0.000237711639051813	0.000339844487902542	0.000415954133962222	0.000459809636128674	0.000533123964049495	0.000316922027553701	0.000635647233470722	0.000813868840427879	0.000562744346580251	0.478926813619772	0.322047489683593	0.985800407868039	unchanged	--	--	--	--	--	--	--	--	--	--	--	--	--	--	--	--
pos_1289	Licorisoflavan A	8.66128013940997e-06	2.44885693084576e-06	1.01773730805491e-05	4.36398779334032e-06	1.34113334924117e-05	4.06298411274431e-06	2.00774994787984e-06	3.43518893349756e-06	2.48344026139341e-06	5.96114808376895e-06	3.01206995342089e-06	5.79197739616079e-06	-0.808139851287901	0.113500532145523	1.815029117646	unchanged	--	--	LMPK12080046	7-O-Methyllicoricidin	(+)-2',4'-Dihydroxy-5,7-dimethoxy-6,3'-diprenylisoflavan	Licorisoflavan A	Polyketides [PK]	Flavonoids [PK12]	Isoflavans [PK1208]	HMDB0034184	Organic compounds	Phenylpropanoids and polyketides	Isoflavonoids	O-methylated isoflavonoids	5319704	129314-37-0
pos_129	Gibberellin A24	0.00019973834686524	0.000200685094757627	0.000853172922397732	8.31295217846434e-05	0.000272870431932781	0.000307933810777474	8.43395146213834e-05	0.000232642697461796	7.75318674444681e-05	0.00163517440191459	0.000307892729822417	0.000532219066130487	0.128487716036188	0.569006197023239	0.522811429678824	unchanged	--	--	LMPR0104170018	Gibberellin A24	-	-	Prenol Lipids [PR]	Isoprenoids [PR01]	C20 isoprenoids (diterpenes) [PR0104]	--	--	--	--	--	--	--
pos_1290	4,6-Icosanedione	1.13243495007456e-05	1.3219259260806e-05	1.09790979527635e-05	1.28848506259087e-05	1.15670747941141e-05	1.12403039859795e-05	1.05285917803596e-05	1.08636545029521e-05	1.27007573760859e-05	1.07766621258677e-05	1.08463306424422e-05	1.18302098192058e-05	-0.0758133900769771	0.262104722084685	1.11443574054623	unchanged	--	--	--	--	--	--	--	--	--	--	--	--	--	--	--	--
pos_1291	3-Methyl-5-pentyl-2-furanundecanoic acid	0.000178914152131474	0.000142082766026002	0.000115348449439559	0.000149846492850154	0.000122856549454064	0.000134162919588135	0.000145432615028673	0.00016583056884375	0.000183687088843243	0.000153420026786609	0.000158066007904133	0.000191745113113411	0.251345175544159	0.0545413867436127	1.77100423447108	unchanged	--	--	LMFA01150013	11-(3-methyl-5-pentylfuran-2-yl)-undecanoic acid	11-(5-pentyl-3-methylfuran-2-yl)-undecanoic acid	11M5; MeF(11,5); 3-methyl-5-pentyl-2-furanundecanoic acid	Fatty Acyls [FA]	Fatty Acids and Conjugates [FA01]	Heterocyclic fatty acids [FA0115]	--	--	--	--	--	--	--
pos_1292	1-(beta-D-Glucopyranosyloxy)-3-octanone	0.000922609764032186	0.00134595370473771	0.00183771201257685	0.000802237618657016	0.00116481311059918	0.00121866613149198	0.000740460318858703	0.00112341824275895	0.000919002232272736	0.00178593710541726	0.00126826499969806	0.00136936628329615	-0.0220432139567883	0.947467029637835	0.0965316543590065	unchanged	--	--	--	--	--	--	--	--	--	--	--	--	--	--	--	--
pos_1293	3-Mercapto-2-methyl-1-butanol	5.70622305543822e-06	4.89903656397404e-06	4.6908256243583e-06	4.25501685587033e-06	4.20873790839255e-06	4.98978654556474e-06	4.70863533849879e-06	4.91452501111544e-06	4.88594529045165e-06	4.45716187300884e-06	4.34316440855743e-06	4.83573424096396e-06	-0.0244668526359568	0.694307764078141	0.378305902083245	unchanged	--	--	--	--	--	--	--	--	--	--	--	--	--	--	--	--
pos_1295	PE(20:3(8Z,11Z,14Z)/22:0)	1.26729803605664e-05	6.24730321695186e-06	3.29665821910793e-06	9.81137529856532e-07	1.34483003283512e-06	7.1300865169679e-06	7.48812236036562e-07	8.59906481880739e-07	1.0848958248778e-06	2.81674896187754e-06	3.0697949566729e-06	0	-5.15600003124449	0.0865930959799937	1.77782915068208	unchanged	--	--	LMGP02010928	PE(20:3(8Z,11Z,14Z)/22:0)	1-(8Z,11Z,14Z-eicosatrienoyl)-2-docosanoyl-glycero-3-phosphoethanolamine	PE(42:3); PE(20:3_22:0)	Glycerophospholipids [GP]	Glycerophosphoethanolamines [GP02]	Diacylglycerophosphoethanolamines [GP0201]	HMDB0009369	Organic compounds	Lipids and lipid-like molecules	Glycerophospholipids	Glycerophosphoethanolamines	52924629	_
pos_1296	4-Amino-1-piperidinecarboxylic acid	3.01089096771921e-05	4.10865619023338e-05	5.79191938927649e-05	5.8990026504973e-05	6.27490298586381e-05	4.76486184481597e-05	5.78025380562578e-05	6.24012316396137e-05	4.8948828051064e-05	4.57709542615969e-05	5.00261263020441e-05	5.4030951876026e-05	0.13158078017001	0.567763538474794	0.595681857208568	unchanged	--	--	--	--	--	--	--	--	--	--	--	--	--	--	--	--
pos_1297	2-(4-Methyl-5-thiazolyl)ethyl decanoate	0.000203914155447108	0.000175582827115808	0.000395912160540605	6.26513655319519e-05	0.000421874467468651	0.000252174168424208	3.86774362113439e-05	0.000103642392599656	9.7484462176299e-05	0.000846123042744953	0.000248702586465807	0.000201752467597731	-0.418274732824026	0.976793699064922	0.0764358484414581	unchanged	--	--	--	--	--	--	--	--	--	--	--	--	--	--	--	--
pos_1298	L-Hexahydro-3-imino-1,2,4-oxadiazepine-3-carboxylic acid	2.44697944391922e-06	3.18532889338232e-06	2.00597701437951e-06	1.95376005855351e-06	4.60060547685507e-06	2.43390653120548e-06	3.4360324293688e-06	2.39572474601243e-06	3.90253805193798e-06	3.34008643663647e-06	2.15348334147023e-06	3.70968056096887e-06	0.2208951446075	0.462164855806798	0.818735662518553	unchanged	--	--	--	--	--	--	--	--	--	--	--	--	--	--	--	--
pos_1299	5beta-1,3,7(11)-Eudesmatrien-8-one	6.11850076560762e-05	6.33463725808219e-05	0.000115363617158126	9.24705308434257e-05	0.00011409148490573	8.7913497328082e-05	5.74331009644497e-05	6.36539804891353e-05	9.70098157044989e-05	9.04270807990136e-05	7.29949988195938e-05	8.11542309276455e-05	-0.187711902734517	0.325780713837334	1.14336727129657	unchanged	--	--	--	--	--	--	--	--	--	--	--	--	--	--	--	--
pos_13	Guanosine	2.23969131286124e-05	2.45634066321134e-05	1.62846721844283e-05	1.83684777618099e-05	3.06808072090743e-05	1.80085358199754e-05	2.32739563592637e-05	2.38366194607509e-05	2.20794098373643e-05	3.07768986298694e-05	2.12526076891193e-05	2.78755243416126e-05	0.216084960505261	0.269092939374823	1.09083961331924	unchanged	C00387	Metabolic pathways(ko01100);;Purine metabolism(ko00230);;ABC transporters(ko02010)	--	--	--	--	--	--	--	--	--	--	--	--	--	--
pos_130	Lecanoric acid	1.64463899194351e-05	8.03777086085386e-05	9.73882416445587e-06	1.58271814701463e-05	2.51108658476852e-05	1.76293528950409e-05	1.3604381688604e-05	1.66058653963087e-05	2.55159686389316e-05	1.84902808914146e-05	1.52767136095026e-05	1.27971799704256e-05	-0.352331591664933	0.379302073001637	0.789136304180762	unchanged	--	--	LMPK13080001	Lecanoric acid	-	-	Polyketides [PK]	Aromatic polyketides [PK13]	Depsides and depsidones [PK1308]	--	--	--	--	--	--	--
pos_1300	Laccarin	0.000516177259545004	0.000307650675408676	0.000254183040458891	0.000252684547149847	0.000355979416085232	0.000312988965324206	0.000381544960738237	0.000327626993588758	0.000307203140802959	0.000283728953774324	0.000332283104344526	0.000336292210379265	0.0165785619955159	0.906279287464487	0.170730317275039	unchanged	--	--	--	--	--	--	--	--	--	--	--	--	--	--	--	--
pos_1301	PS(14:1(9Z)/18:2(9Z,12Z))	3.20517760485464e-05	4.17087549303255e-05	4.20472383059359e-05	3.5340788118126e-05	3.05843560319044e-05	4.56051805142697e-05	3.356548323395e-05	4.0912149073291e-05	4.57232198446704e-05	4.07814627549097e-05	4.04359524062511e-05	3.64230470370473e-05	0.0741245080177677	0.576263998484519	0.692819860774035	unchanged	--	--	LMGP03010121	PS(14:1(9Z)/18:2(9Z,12Z))	1-(9Z-tetradecenoyl)-2-(9Z,12Z-octadecadienoyl)-glycero-3-phosphoserine	PS(32:3); PS(14:1_18:2)	Glycerophospholipids [GP]	Glycerophosphoserines [GP03]	Diacylglycerophosphoserines [GP0301]	HMDB0012347	Organic compounds	Lipids and lipid-like molecules	Glycerophospholipids	Glycerophosphoserines	52925231	_
pos_1303	3-Acetoxyscirpene-4,15-diol	2.16293973709398e-05	3.20586450074868e-05	1.74500153253142e-05	2.51789291274788e-05	2.2929694208359e-05	2.25208831862733e-05	2.13057430271401e-05	2.16944288012366e-05	1.76580048486725e-05	2.76695274020105e-05	2.05714950741328e-05	1.84228784949229e-05	-0.146383368920906	0.35106176217876	0.872790758373346	unchanged	--	--	--	--	--	--	--	--	--	--	--	--	--	--	--	--
pos_1304	Norambreinolide	8.27538699079665e-05	9.82526541448008e-05	0.000104456262470658	9.45787698874181e-05	8.07370970899906e-05	8.94933208072982e-05	8.56199298465793e-05	9.44291549689873e-05	9.51883621521759e-05	9.70911994352748e-05	9.41664173183019e-05	8.86065612991397e-05	0.0172087616244774	0.851513945354679	0.193055901269298	unchanged	--	--	--	--	--	--	--	--	--	--	--	--	--	--	--	--
pos_1305	(7b,10a)-3-Hydroxy-1,3,5-cadinatrien-9-one	4.37752120325568e-05	4.88599569577114e-05	4.37172205812665e-05	4.75383991364898e-05	3.94465643252729e-05	4.45766943964743e-05	4.05666837766621e-05	4.4215201580114e-05	3.9507557899205e-05	4.16809678594724e-05	4.38236525570408e-05	4.02445979033122e-05	-0.0975651482591928	0.0936293952954665	1.61449583379265	unchanged	--	--	--	--	--	--	--	--	--	--	--	--	--	--	--	--
pos_1306	2-(2-Furanyl)-3-piperidinol	4.81448042470606e-05	5.78660839260259e-05	5.26647981351269e-05	4.98970936001761e-05	4.48317738257783e-05	4.92163117057226e-05	4.78284186052174e-05	5.17078678276201e-05	5.369684017699e-05	4.79680545125029e-05	5.21847437642022e-05	5.01532952251061e-05	0.00759743577270733	0.942553214753608	0.176890976362524	unchanged	--	--	--	--	--	--	--	--	--	--	--	--	--	--	--	--
pos_1307	DG(14:1(9Z)/20:0/0:0)	0.00216949753161676	0.00166345128763775	0.0014882139028658	0.00167534961564716	0.00131368858250914	0.00151887869208602	0.00153363350371889	0.00148988129499353	0.00162724523989405	0.0015055779900238	0.00155028443301969	0.00133971181005205	-0.104476452520233	0.337909535794993	1.11164961519226	unchanged	--	--	--	--	--	--	--	--	--	HMDB0007049	Organic compounds	Lipids and lipid-like molecules	Glycerolipids	Diradylglycerols	53477984	_
pos_1308	ent-8(17),13(16),14-Labdatrien-18-oic acid	6.17645902587467e-05	6.52661947738841e-05	6.04704345811661e-05	5.59757404560689e-05	5.32827301523296e-05	5.72108178971103e-05	5.24982833267222e-05	5.83158011068176e-05	5.39996342417839e-05	6.31710249172925e-05	5.63176573170488e-05	5.83845686364583e-05	-0.0460932327328383	0.442255699802906	0.805079975436806	unchanged	--	--	--	--	--	--	--	--	--	--	--	--	--	--	--	--
pos_1309	Azukisaponin VI	8.9534843481527e-06	6.99805113265509e-06	3.13860346135632e-06	6.12594773370443e-06	1.26043944454872e-05	8.33647030811281e-06	1.49528661025606e-05	9.98507361711235e-06	7.29661020501872e-06	3.2012313508246e-06	9.20127269392335e-06	4.3690880524619e-06	0.0245653828192829	0.83083755905314	0.31308723614572	unchanged	--	--	--	--	--	--	--	--	--	--	--	--	--	--	--	--
pos_1310	gamma-Eudesmol rhamnoside	1.880146243414e-05	2.07891579137137e-05	1.7214056067928e-05	2.42531632168578e-05	0.000543584306261054	2.1453249131386e-05	2.40625232459175e-05	2.2676445876785e-05	1.99191016346778e-05	2.09512860985764e-05	2.27169584446e-05	2.24872126549293e-05	-0.672002644219045	0.371560428313164	1.04665755776317	unchanged	--	--	--	--	--	--	--	--	--	--	--	--	--	--	--	--
pos_1311	1-Deoxy-D-glucitol	0.000101037532027429	7.77899387493278e-05	8.70331859208876e-05	5.98753450772786e-05	7.49816952073128e-05	7.74804940920492e-05	7.35623716034624e-05	7.88843704154777e-05	7.24427231728927e-05	9.14825177592364e-05	8.00039469143523e-05	8.84863177208163e-05	0.0323779424942625	0.866788107031867	0.0894296566743738	unchanged	--	--	LMFA05000598	1-Deoxy-D-glucitol	hexane-1,2,3,4,5-pentol	-	Fatty Acyls [FA]	Fatty alcohols [FA05]	-	--	--	--	--	--	--	--
pos_1312	8-Hydroxyluteolin 4'-methyl ether 8-glucuronide	1.66947190811225e-05	1.05881210588029e-06	2.28750088019599e-06	1.59936902347235e-06	9.01294083674315e-06	7.1774265957978e-06	8.26362612441436e-06	6.75096009497921e-06	2.33896454727637e-06	5.45487601429261e-06	4.9491536723369e-06	3.80475227353352e-06	0.279960364565234	0.702055285390818	0.496914288614388	unchanged	--	--	LMPK12111385	8-Hydroxyluteolin 4'-methyl ether 8-glucuronide	-	-	Polyketides [PK]	Flavonoids [PK12]	Flavones and Flavonols [PK1211]	--	--	--	--	--	--	--
pos_1313	LysoPE(0:0/20:3(11Z,14Z,17Z))	2.78865517310007e-05	5.94365845055209e-05	3.32686472043953e-05	0.000125580944934329	1.17337145263852e-05	4.70014656972196e-05	2.50801436619003e-05	2.27095491718361e-05	7.07762466778637e-05	4.60526121164873e-05	3.49250803410823e-05	2.1914166394652e-05	-0.237745837193913	0.467182838228475	0.790658721397068	unchanged	--	--	--	--	--	--	--	--	--	HMDB0011484	Organic compounds	Lipids and lipid-like molecules	Glycerophospholipids	Glycerophosphoethanolamines	53480933	_
pos_1314	Panaxydol	8.32677852614526e-05	0.000114633372203692	4.27434314488199e-05	5.87785358204991e-05	9.65364218267481e-05	7.34904115621484e-05	5.39637452942184e-05	4.27046724304506e-05	5.2759117371608e-05	7.65019602748674e-05	5.67294220553027e-05	4.45751910200535e-05	-0.475782581713142	0.0810158141822642	1.69018455136727	unchanged	--	--	LMFA05000028	Panaxydol	9,10-epoxy-1-heptadecen-4,6-diyn-3-ol	9,10-epoxy-heptadeca-1-en-4,6-diyn-3-ol	Fatty Acyls [FA]	Fatty alcohols [FA05]	-	--	--	--	--	--	--	--
pos_1315	Isopropylmaleate	1.7344746416432e-05	2.48742239286796e-05	1.25964797854797e-05	2.11276772671357e-05	2.00022846694726e-05	1.75999854662526e-05	1.94735988577458e-05	1.68070395227514e-05	2.08822698184919e-05	2.10441658315305e-05	1.80701641688068e-05	1.32266832218429e-05	-0.0389498537760353	0.752968644474542	0.264344438208967	unchanged	C02631	2-Oxocarboxylic acid metabolism(ko01210);;Valine, leucine and isoleucine biosynthesis(ko00290)	--	--	--	--	--	--	--	HMDB0012241	Organic compounds	Lipids and lipid-like molecules	Fatty Acyls	Fatty acids and conjugates	5280533	44976-69-4
pos_1316	Tsugaric acid B	0.00814858214442947	0.00296824087484921	0.00297369924001983	0.00255114294921671	0.0037340099923378	0.00374999204560251	0.00401301564950852	0.00347163469339546	0.00335976075546833	0.00322260473126622	0.00352531118540033	0.00352455074223971	-0.0758492270776294	0.582117140253969	0.691828902056732	unchanged	--	--	--	--	--	--	--	--	--	--	--	--	--	--	--	--
pos_1317	Pipazethate	7.04973001533332e-05	0.00011443115944705	7.6182975702631e-05	6.83695146135636e-05	7.66735589359853e-05	7.48446207895527e-05	0.000114417989239475	0.00010504134835483	7.13548946824478e-05	7.53873262770238e-05	9.698949181474e-05	9.03841217838162e-05	0.205488995702309	0.244091325499756	1.40220360771979	unchanged	--	--	--	--	--	--	--	--	--	--	--	--	--	--	--	--
pos_1318	Deoxyloganic acid	0.000176174331844072	0.000178064962101222	0.000197283549066299	0.00016260095370794	0.000166826813774261	0.000178597746060186	0.000125215589890289	0.00016244245702283	0.00019213156828298	0.000174737708123971	0.000167919886783104	0.000196832166950055	-0.0682852058938277	0.580211986345968	0.673634317402737	unchanged	--	--	--	--	--	--	--	--	--	HMDB0037028	Organic compounds	Lipids and lipid-like molecules	Prenol lipids	Terpene glycosides	4490284	92842-56-3
pos_132	14-methyl palmitic acid	0.000127558715619372	0.000113611209359602	0.000171969931895308	0.000184571664217063	7.20911765895505e-05	0.000133113990206956	0.000161421821618466	0.000152388478310156	0.000156238813546515	0.000118852363636095	0.000152498285543868	0.00015562813017119	0.216041321745914	0.40930888333287	0.874618328932415	unchanged	--	--	--	--	--	--	--	--	--	--	--	--	--	--	--	--
pos_1320	Momordicinin	0.00202323143465156	0.00180201663882979	0.00160180934016776	0.00181835338793389	0.00170551126233748	0.00172142235207509	0.00199173198764084	0.00190849374685039	0.00196406490718556	0.00188976725775007	0.00183996293703257	0.00189404331041662	0.109540177209611	0.0691361063111991	1.81282947876424	unchanged	--	--	--	--	--	--	--	--	--	--	--	--	--	--	--	--
pos_1321	Montecristin	0.000327967264273695	0.000862189086946261	9.98503111623536e-05	9.29602844452244e-05	7.40989823107653e-05	0.000214948970037813	0.000106432772485059	0.000114327533787874	9.96347372999422e-05	8.93894307566803e-05	9.42412352465548e-05	0.00013905065211803	-0.813258012000741	0.222965330432965	1.13667153583137	unchanged	--	--	--	--	--	--	--	--	--	--	--	--	--	--	--	--
pos_1322	Linalool oxide D 3-[apiosyl-(1->6)-glucoside]	0.0001891907221572	0.000184391094398995	0.000186179616068265	0.000158264846555223	0.000189069136368396	0.000175748202956967	0.00019544767021446	0.000185944965197339	0.000154761556899056	0.0002012480283098	0.00015472344687666	0.000197991869108207	0.00362379798152368	0.906892313572912	0.19188467641913	unchanged	--	--	--	--	--	--	--	--	--	--	--	--	--	--	--	--
pos_1323	Guanidinosuccinic acid	1.81222276171407e-05	1.85047438939659e-05	1.3802855521764e-05	2.27998558003795e-05	1.52709612350273e-05	1.9161265097041e-05	1.87153264668074e-05	1.75190611026465e-05	1.53643167161108e-05	1.71162889530957e-05	1.92887702243487e-05	1.44993640831987e-05	-0.0594634353847709	0.580813853978626	0.535910971134236	unchanged	--	--	--	--	--	--	--	--	--	HMDB0003157	Organic compounds	Organic acids and derivatives	Carboxylic acids and derivatives	Amino acids, peptides, and analogues	439918	6133-30-8
pos_1325	Pergolide	0.000303669113240613	0.000305794179840574	0.000316664948751881	0.000153894303978439	0.000216386057733653	0.000265598092152241	9.56301147257149e-05	0.000188733331174315	0.000106346235310959	0.000322505435158013	0.00017169334010077	0.00040554955430879	-0.432186601178273	0.450320036288385	0.788362860589675	unchanged	--	--	--	--	--	--	--	--	--	--	--	--	--	--	--	--
pos_1326	Nabilone	0.000218497942052943	0.000253316040996134	0.000426560126972914	0.000514238552458472	0.000610196352340334	0.000364434657827048	0.0004923676577913	0.000510134581270596	0.00041588986965582	0.000318810524463975	0.000365672083883234	0.000336775495966155	0.100528937489361	0.90361221981664	0.0725947723686986	unchanged	--	--	--	--	--	--	--	--	--	--	--	--	--	--	--	--
pos_1327	O-acetyl-ADP-ribose	2.47839804968465e-05	6.1059696391284e-06	8.71787606722655e-06	7.49127240745354e-06	9.61115883272584e-06	8.76283551695161e-06	1.209976075925e-05	8.23049306348961e-06	1.0674384094721e-05	8.76793689051337e-06	9.16079349602323e-06	1.03376790390848e-05	0.0141107872082209	0.733080754448188	0.491989119019754	unchanged	--	--	--	--	--	--	--	--	--	--	--	--	--	--	--	--
pos_1328	(Z)-3-Oxo-2-(2-pentenyl)-1-cyclopenteneacetic acid	1.8814823067755e-05	4.60840265327482e-05	1.78962766627701e-05	2.01162827468139e-05	2.45673449442638e-05	2.43162178694514e-05	4.28630834050164e-05	3.60262904381374e-05	2.53429394700381e-05	2.51657649496546e-05	3.29211663591323e-05	0.00223679593485489	1.43388614112061	0.354762861292365	1.05196754455426	unchanged	--	--	--	--	--	--	--	--	--	--	--	--	--	--	--	--
pos_1329	Indolylacryloylglycine	5.75292886424592e-06	7.85184886707646e-06	8.13294922482475e-06	5.21323356165369e-06	3.75248309755147e-06	5.96901064683354e-06	4.02432046093245e-06	6.02879655339154e-06	6.8106195620399e-06	5.5523799028788e-06	4.92378624667949e-06	4.73208789418985e-06	-0.167478494820749	0.357883453146672	0.927327713829226	unchanged	--	--	--	--	--	--	--	--	--	HMDB0006005	Organic compounds	Organic acids and derivatives	Carboxylic acids and derivatives	Amino acids, peptides, and analogues	5370648	3475-68-1
pos_133	1α,25-dihydroxy-24-nor-22-oxavitamin D3 / 1α,25-dihydroxy-24-nor-22-oxacholecalciferol	0.000103118850128283	0.000109063317709569	9.64100774997213e-05	8.9872428638604e-05	0.000109880167922847	9.58178089315817e-05	0.000160481239787251	0.000123965532079287	0.000161581551878289	0.000113844242670593	0.000131320970480963	8.03247388867606e-05	0.318617333218857	0.076605263874515	1.87635371481367	unchanged	--	--	--	--	--	--	--	--	--	--	--	--	--	--	--	--
pos_1330	Peltatol C	0.000460556499509836	0.000191307418356675	0.000178377954977959	0.000171249526430633	0.000207444634495452	0.000211593462989187	0.000236019582605146	0.000198317396286914	0.000193173244676762	0.000177143033636242	0.000192064421838601	0.000184410961591127	-0.176381194421856	0.422884044158819	0.950982955027821	unchanged	--	--	--	--	--	--	--	--	--	--	--	--	--	--	--	--
pos_1332	erythro-6,8-Pentacosanediol	0.000500449163567048	0.000540766376498502	0.000519434745797191	0.000613444286314808	0.00048103096352461	0.00056390862885142	0.000567130944758369	0.000574502764623688	0.000558364927434623	0.000567466841334785	0.000587790723345189	0.000547181324354769	0.08422778515685	0.183456832331678	1.45641680634684	unchanged	--	--	--	--	--	--	--	--	--	--	--	--	--	--	--	--
pos_1333	Alliosterol 1-(4''-galactosylrhamnoside) 16-galactoside	5.87076575108998e-05	6.41237118290316e-05	5.19127096878858e-05	0.000174709824766309	4.98791157192279e-05	5.69617267699342e-05	4.95466294011468e-05	0.000112983712230291	0.000267934085034741	7.97093606466462e-05	0.000213247532131607	0.00014042050970485	0.86761867813803	0.120601420756618	1.44733956288286	unchanged	--	--	--	--	--	--	--	--	--	--	--	--	--	--	--	--
pos_1334	1,24-Tetracosanediol	0.000254399988050147	0.000762739202962404	0.00107482059960423	0.000542228070809575	0.000434822675468574	0.000524058972487762	0.000576998075166454	0.000988384093429528	0.000628770182933209	0.000627204499842167	0.00073015790217037	0.00102759437664897	0.451857654312059	0.275798006231212	1.16660978273102	unchanged	--	--	LMFA05000580	1,24-Tetracosanediol	tetracosane-1,24-diol	-	Fatty Acyls [FA]	Fatty alcohols [FA05]	-	--	--	--	--	--	--	--
pos_1336	Neotussilagine	1.10143275689103e-05	2.31595750292418e-05	2.14060042750917e-05	2.09439965449765e-05	9.41871854216108e-06	1.94859342056183e-05	1.69415846838409e-05	2.95510901394166e-05	1.60516246212235e-05	1.58074107108644e-05	1.52973067358869e-05	1.84286882994678e-05	0.128458892301467	0.740766375106966	0.451853317964691	unchanged	--	--	--	--	--	--	--	--	--	--	--	--	--	--	--	--
pos_1338	6-Succinoaminopurine	3.06504766705764e-05	4.51665606307399e-05	2.34860611438098e-05	3.0817497537213e-05	3.24169172222506e-05	2.91580919887087e-05	3.2075769330625e-05	2.82471638607767e-05	3.13709833730862e-05	3.84328448606904e-05	2.80675322326827e-05	2.75070603977905e-05	-0.0278829452956355	0.774936338801629	0.185539325012963	unchanged	--	--	--	--	--	--	--	--	--	--	--	--	--	--	--	--
pos_1339	PE(18:3(6Z,9Z,12Z)/20:5(5Z,8Z,11Z,14Z,17Z))	2.6737422015098e-05	1.06320367149939e-05	6.12161318031332e-05	2.38207796162021e-05	3.67652222287132e-05	0.000219668919948046	5.6437120313746e-05	6.2945311180036e-05	8.03107635436269e-05	0.000124542637431557	5.17243721510084e-05	3.91435682518875e-05	0.73758542364655	0.865774579486912	0.307897756644129	unchanged	--	--	LMGP02010703	PE(18:3(6Z,9Z,12Z)/20:5(5Z,8Z,11Z,14Z,17Z))	1-(6Z,9Z,12Z-octadecatrienoyl)-2-(5Z,8Z,11Z,14Z,17Z-eicosapentaenoyl)-glycero-3-phosphoethanolamine	PE(38:8); PE(18:3_20:5)	Glycerophospholipids [GP]	Glycerophosphoethanolamines [GP02]	Diacylglycerophosphoethanolamines [GP0201]	HMDB0009137	Organic compounds	Lipids and lipid-like molecules	Glycerophospholipids	Glycerophosphoethanolamines	52924404	_
pos_134	3-Oxo-7α-hydroxy-5α-cholestan-26-oic acid	0.000597888574619807	0.000809571516450661	0.000402010106996638	0.00061205327314991	0.000692521707040265	0.000630516685064865	0.00051559979328173	0.000372823786799877	0.000402592706906503	0.000760776025471454	0.000473564140212548	0.00025765746727218	-0.475960893259328	0.101862339562054	1.56451542894949	unchanged	--	--	--	--	--	--	--	--	--	--	--	--	--	--	--	--
pos_1341	Isoleucyl-Tryptophan	0.00649811595198651	0.00293477443289898	0.00271437686388168	0.00249570365767038	0.00438688205007149	0.00446498034389829	0.00480372025142202	0.00385208975071607	0.00357112643550484	0.00356931586040785	0.00379450102718991	0.0040797248078488	0.0881689571573112	0.965570086028056	0.0302080646614164	unchanged	--	--	--	--	--	--	--	--	--	--	--	--	--	--	--	--
pos_1343	Procurcumenol	3.16717766270441e-05	3.85051518905014e-05	3.43853873818067e-05	3.4151243273245e-05	2.60870942943951e-05	3.22925731498529e-05	3.1779555503327e-05	3.3299571693899e-05	3.53332791573456e-05	3.02187771727824e-05	3.26610406959695e-05	3.15807340422501e-05	-0.00830511415173163	0.844361145397964	0.0885840211344523	unchanged	--	--	--	--	--	--	--	--	--	--	--	--	--	--	--	--
pos_1344	beta-Carotenone	0.0022761867463638	0.00318423756925844	0.00256279140412057	0.00261435669431372	0.00172562366324456	0.00291905290085321	0.00238878150544501	0.00269775461754015	0.00280758670856616	0.00196207725064265	0.00280412881400834	0.00228338392682814	-0.0176474400352369	0.82649956415355	0.0552014993419531	unchanged	--	--	--	--	--	--	--	--	--	--	--	--	--	--	--	--
pos_1345	Ganoderic acid S	4.49652912993909e-05	2.19621806563784e-05	2.42535871999318e-05	2.10549758138459e-05	2.4922907857798e-05	2.24476041671605e-05	4.74933058891599e-05	3.56479349312388e-05	4.77356813389328e-05	1.9268488434717e-05	2.64519816698155e-05	4.77973745079864e-05	0.467155825950289	0.119045350124667	1.56641457290999	unchanged	--	--	--	--	--	--	--	--	--	--	--	--	--	--	--	--
pos_1347	1(10),11-Eremophiladiene-2,9-dione	4.24099807436897e-06	5.38725000230506e-06	5.88934074340801e-06	5.80958631703303e-06	5.46529717413635e-06	5.36196926011316e-06	5.39266050009931e-06	6.90302407684911e-06	5.73398984873798e-06	5.95688276336644e-06	6.20198315186751e-06	6.8049647913759e-06	0.204680437587385	0.0405049492731453	1.92112388079339	up	--	--	--	--	--	--	--	--	--	--	--	--	--	--	--	--
pos_1348	Glucoconvallatoxoloside	7.65683111923769e-06	1.91755344570296e-05	3.57636969231502e-06	6.6459214561802e-06	8.63219155798208e-06	8.39543580882237e-06	7.02185774582547e-06	4.43972974620776e-06	1.03849644230368e-05	1.23294820172559e-05	9.12642297284605e-06	5.63712527588574e-06	-0.0500735178343206	0.739386196348797	0.22374278029531	unchanged	--	--	--	--	--	--	--	--	--	--	--	--	--	--	--	--
pos_1349	4,6-Heptadiyne-1,3-diol	2.421141771244e-05	3.04387274509037e-05	2.7298347758023e-05	2.53206073315873e-05	2.26713872592574e-05	2.47734927623419e-05	2.23717341569504e-05	2.49347026720107e-05	2.78098103379943e-05	2.17498432384074e-05	2.46424778713394e-05	2.46888131854905e-05	-0.0798258981137554	0.342523407746236	0.893190133594103	unchanged	--	--	--	--	--	--	--	--	--	--	--	--	--	--	--	--
pos_135	1α-hydroxy-24-(dimethylphosphoryl)-25,26,27-trinorvitamin D3 / 1α-hydroxy-24-(dimethylphosphoryl)-25,26,27-trinorcholecalciferol	0.00028219052587091	0.000237526266822087	0.000192372339695398	0.000299684189845267	0.000229327687949681	0.000252811172449093	0.000482333114813914	0.000361695335913765	0.000277944861038184	0.000284480114025575	0.000343538576855507	0.000244510545152894	0.395121405690237	0.0657054775295078	1.92299019360596	unchanged	--	--	--	--	--	--	--	--	--	--	--	--	--	--	--	--
pos_1350	Nandrolone phenpropionate	4.95239835243586e-06	7.43772390751014e-06	3.08264539801232e-05	2.87257484499613e-06	1.9952011404309e-06	9.05116240347787e-06	5.86586358898253e-06	0.000134314166112847	7.31486270957778e-05	2.12612561358357e-06	9.82651524912269e-05	0.000343470149132853	2.68322973944276	0.109116735530055	1.70320223039595	unchanged	--	--	--	--	--	--	--	--	--	HMDB0002725	Organic compounds	Lipids and lipid-like molecules	Steroids and steroid derivatives	Estrane steroids	9904	434-22-0
pos_1351	4-Acetylzearalenone	2.3035408682377e-05	2.13801697994952e-05	4.93267348738042e-06	1.90088976699097e-05	1.76366283178207e-05	1.57909754403001e-05	5.12636503859076e-05	3.33282324464124e-05	9.78353023097308e-06	5.25061922141539e-05	3.30485603454829e-05	1.06366986049921e-05	0.764052558634388	0.114853530230968	1.6634302990963	unchanged	--	--	--	--	--	--	--	--	--	--	--	--	--	--	--	--
pos_1352	Zingerone	2.7484524312487e-06	4.08493705002979e-06	2.40585776387901e-06	2.64954467435271e-06	2.66559191767664e-06	2.67650041940721e-06	3.04368811483279e-06	2.25612406509945e-06	5.18875944269072e-06	2.58512243940153e-06	3.26067539179862e-06	3.14781838338323e-06	0.148129893637389	0.461658718430813	0.856615378728162	unchanged	--	--	--	--	--	--	--	--	--	--	--	--	--	--	--	--
pos_1353	PS(DiMe(13,5)/MonoMe(11,5))	1.5012588045451e-05	5.27202238242029e-06	3.23542116623596e-05	1.45630821490225e-05	2.28837085222071e-05	0.000132849772580879	3.70851718160335e-05	3.72435581405282e-05	4.89439409068876e-05	7.05321040245912e-05	3.40903751996958e-05	2.57829644613861e-05	0.868018543063661	0.811082610712163	0.393346986891044	unchanged	--	--	--	--	--	--	--	--	--	--	--	--	--	--	--	--
pos_1354	Desonide	7.31213702834783e-06	1.26205376156141e-05	3.35859033563193e-06	5.07090953040899e-05	5.07034771009731e-06	1.79081233408276e-05	1.98401319700363e-05	1.28904077747235e-05	6.08703867226003e-09	2.61098220449751e-06	1.1113344764176e-05	4.16174321273513e-07	-2.70200739147416	0.328859837672462	0.991577103996784	unchanged	--	--	--	--	--	--	--	--	--	--	--	--	--	--	--	--
pos_1355	Stearic acid	0.000247035128140017	0.000240938133782215	0.000513792119563923	0.000421044669512726	0.000372094378878419	0.000349220790032932	0.000228422021064922	0.000497563358540792	0.000270030499518995	0.000238512289588293	0.000340596370960418	0.000482508198303188	-0.0793267644672397	0.829381250461958	0.320066632377943	unchanged	C01530	Phototransduction - fly(ko04745);;Biosynthesis of unsaturated fatty acids(ko01040);;Fatty acid biosynthesis(ko00061)	LMFA01010018	Stearic acid	octadecanoic acid	Cetylacetic acid; Stearate; n-Octadecanoic acid; Octadecanoate; C18:0; Lactaric acid; Talgic acid; Bassinic acid; Stearophanic acid	Fatty Acyls [FA]	Fatty Acids and Conjugates [FA01]	Straight chain fatty acids [FA0101]	--	--	--	--	--	--	--
pos_1356	Tri-N-acetylchitotriose	6.254774774763e-06	3.48335474280711e-05	6.63899876223385e-07	2.35415141405784e-06	2.0799618747688e-05	1.19897950151721e-05	7.93030852926571e-06	2.30894918046743e-06	9.11494385960132e-06	2.39848961826292e-05	8.95207514029987e-06	2.83117892518686e-06	0.0427830240320652	0.574806034188584	0.469516372970179	unchanged	--	--	--	--	--	--	--	--	--	--	--	--	--	--	--	--
pos_1358	Phytocassane B	4.23482387234368e-05	6.07662891009611e-05	5.54048509199359e-05	5.59494189725341e-05	3.73490795335637e-05	5.24327806963118e-05	4.28047019229227e-05	5.31157719394843e-05	5.79901350944425e-05	4.38845140039926e-05	4.85354846542403e-05	4.7024983320669e-05	-0.0403923335810799	0.686848963414578	0.335742245180131	unchanged	--	--	--	--	--	--	--	--	--	--	--	--	--	--	--	--
pos_136	Ala Phe Ile	0.00587146015636069	0.00304392233094023	0.00102204846443927	0.00261636085813087	0.000453814922389576	0.00243252080725715	0.00064638126608757	0.000871155695349433	0.00139788880346509	0.00747615734486529	0.00226674945931043	0.0013437158991428	-0.259574119857653	0.858568782021153	0.292181912304596	unchanged	--	--	--	--	--	--	--	--	--	--	--	--	--	--	--	--
pos_1360	3b,17b-Dihydroxyetiocholane	2.09527933839213e-05	2.97526053201771e-05	2.9799969085188e-05	6.64977917681452e-06	7.33245523830438e-06	7.86335817362492e-05	5.97754242503466e-06	6.91401888843919e-05	6.5930802590592e-06	7.56990367163447e-05	8.61492390273227e-05	7.56425234322213e-05	0.706353724134035	0.220039157316351	1.28642906412191	unchanged	--	--	--	--	--	--	--	--	--	--	--	--	--	--	--	--
pos_1361	6b-Hydroxy-8a-methoxy-7(11)-eremophilen-12,8-olide	0.000108834444216852	0.000174335743349524	0.00013775391221936	0.00014805059891577	0.00010835119050981	0.000141462757847652	0.000134071075486489	0.000127384809983552	0.000151478344842971	0.000138760016018241	0.000138062938716541	0.000111685438905082	-0.0166104279237427	0.809724526623486	0.0914751914435407	unchanged	--	--	--	--	--	--	--	--	--	--	--	--	--	--	--	--
pos_1362	Sparfloxacin	1.18706276380756e-05	8.38718685838071e-06	7.12383378181231e-06	8.4194443664096e-06	6.15727168790657e-06	7.33849452667918e-06	8.1918816201105e-06	7.73448638941517e-06	7.03314019384478e-06	8.86465961327815e-06	7.60120215440479e-06	1.12771296499337e-05	0.0546041045621521	0.82296973124774	0.196355325931731	unchanged	C07662	ABC transporters(ko02010)	--	--	--	--	--	--	--	--	--	--	--	--	--	--
pos_1363	L-trans-5-Hydroxy-2-piperidinecarboxylic acid	5.64151332686819e-05	5.44113921284071e-05	7.05899073762935e-05	4.02058227496322e-05	5.42766070013896e-05	5.27275393890799e-05	4.74176287445445e-05	5.54502446676625e-05	4.24018095365618e-05	7.59268065483188e-05	5.8976468293509e-05	6.97515453303567e-05	0.080328762521642	0.60117080056231	0.492604553363618	unchanged	--	--	--	--	--	--	--	--	--	--	--	--	--	--	--	--
pos_1364	Quinquenoside F1	8.73342581337702e-05	5.19874603002746e-05	3.64068191130312e-05	5.04620943632213e-05	5.1263371577389e-05	5.79595569979693e-05	5.18063183053235e-05	5.04276587871877e-05	5.00512201598686e-05	4.32251125060748e-05	4.45671124362657e-05	5.39535575346622e-05	-0.144463205583117	0.37350021974687	0.986526909686278	unchanged	--	--	--	--	--	--	--	--	--	--	--	--	--	--	--	--
pos_1365	AS 1-1	0.000324776566342586	0.00012598224483792	0.000113674188593046	0.000104442582157014	0.000154165391173389	0.000147816911768643	0.000173003373165158	0.000139478821321343	0.000128509855616811	0.000127669264071462	0.00013815440172884	0.00013711928705234	-0.0936205721544212	0.561328827724668	0.706159299428651	unchanged	--	--	--	--	--	--	--	--	--	--	--	--	--	--	--	--
pos_1366	TG(14:1(9Z)/18:4(6Z,9Z,12Z,15Z)/22:6(4Z,7Z,10Z,13Z,16Z,19Z))	7.49093799587881e-05	0.000101168809196972	8.67575935486547e-05	0.000107564658642619	9.19548409346223e-05	0.000104732433851904	9.96645591203828e-05	8.72235647282508e-05	0.00012082639579915	0.000100952519615512	0.000104948095875248	8.30049751558049e-05	0.073257659755976	0.52559399323923	0.754341474611987	unchanged	--	--	--	--	--	--	--	--	--	HMDB0048297	Organic compounds	Lipids and lipid-like molecules	Glycerolipids	Triradylcglycerols	_	_
pos_1367	3-hydroxypentadecanoyl carnitine	3.25581024774294e-06	4.80509939227293e-06	1.39054168676293e-06	4.52601929323536e-06	2.74374877358906e-06	4.26802516362791e-06	4.79785954308387e-06	3.36548561054646e-06	4.74112351231887e-06	5.3378833228614e-06	5.28641887875219e-06	1.82694800437445e-06	0.29587316400751	0.368092170244901	1.00716962935494	unchanged	--	--	--	--	--	--	--	--	--	--	--	--	--	--	--	--
pos_1368	lysoPC(26:1(5Z))	1.83898722185486e-05	5.94463922817574e-06	1.70832327473927e-06	2.536549891259e-08	6.13665070420939e-07	4.91497284627991e-06	2.97140099125371e-05	1.72482269308471e-05	1.39719236069853e-06	6.50027549007252e-06	7.02330149916486e-06	1.38168195829853e-06	1.93772100674371	0.347473387973627	1.06363819571409	unchanged	--	--	--	--	--	--	--	--	--	--	--	--	--	--	--	--
pos_1369	Alanyltryptophan	2.47062469849395e-05	3.256175312242e-05	1.42272060706712e-05	2.2896397187451e-05	2.66153220706785e-05	2.29508609885507e-05	2.14982203690657e-05	1.76514686604683e-05	2.11796690154195e-05	2.71578847165911e-05	2.03595537494195e-05	1.69660300378409e-05	-0.181036824337575	0.295034731886529	1.01031424966245	unchanged	--	--	--	--	--	--	--	--	--	HMDB0013209	Organic compounds	Organic acids and derivatives	Carboxylic acids and derivatives	Amino acids, peptides, and analogues	85362	16305-75-2
pos_137	2,6,6-Trimethyl-2-cyclohexene-1,4-dione	0.000173893928184645	0.000177294662685662	2.24096864328154e-05	0.000109162126041124	0.000179773753278698	0.000137010659799997	2.41227576760009e-05	2.43181109419071e-05	1.97511558758124e-05	0.000131901885625438	5.0594031133571e-05	2.83048422175909e-05	-1.62154834975248	0.019368451282156	2.18180020658806	down	--	--	--	--	--	--	--	--	--	--	--	--	--	--	--	--
pos_1370	FMNH2	1.85471589702265e-05	1.41158741298001e-05	0	2.74876998979499e-06	1.3822956366106e-05	6.66522024259159e-06	3.46808654564704e-07	2.7550334907704e-07	1.8953720964621e-07	4.52544860509124e-06	5.08894023222634e-07	9.17553807195752e-08	-0.296266625005515	0.0372508075170043	2.14621619463489	down	C01847	Metabolic pathways(ko01100);;Riboflavin metabolism(ko00740)	--	--	--	--	--	--	--	--	--	--	--	--	--	--
pos_1371	Aeglin	3.06705046384331e-06	4.89357185441307e-06	4.41569515365794e-07	3.89884570725048e-06	2.6436838958978e-06	2.76205523266864e-06	3.41668430026941e-06	1.9180868558296e-06	5.4104279012127e-07	3.81054398751788e-06	2.60007083478185e-06	3.05544254430245e-07	-0.689285071181267	0.33990057187588	0.896450690784786	unchanged	--	--	--	--	--	--	--	--	--	--	--	--	--	--	--	--
pos_1372	Indole-3-carboxilic acid-O-sulphate	8.89509012233907e-06	2.2056008512307e-05	9.06191591890368e-06	1.66615568582796e-05	2.03101605761738e-05	1.2721520254882e-05	1.79801407545588e-05	1.46244377369279e-05	7.62254377149198e-06	1.23882707710748e-05	1.41315821630702e-05	1.02471654851816e-05	-0.181647364960199	0.458966990258348	0.63218852664283	unchanged	--	--	--	--	--	--	--	--	--	--	--	--	--	--	--	--
pos_1373	Roxithromycin	0.00314695761816335	0.00106490295244397	0.0010132594593653	0.000865466511225282	0.001416330214597	0.00136124006851067	0.00149500608188409	0.00122371177250459	0.00119557500250566	0.00115359698737976	0.00124429627225821	0.00120184367435356	-0.0977456774399901	0.544502384095066	0.747878923948485	unchanged	--	--	--	--	--	--	--	--	--	--	--	--	--	--	--	--
pos_1374	Nookatone	5.3796619703416e-05	5.99853689220266e-05	6.23422800987689e-05	7.92900108071659e-05	0.000105835340355188	6.7540808977089e-05	6.69396544230485e-05	6.97869495532966e-05	7.08145597297352e-05	6.86928102085621e-05	6.9620814319309e-05	7.67442906257143e-05	0.0151027304002334	0.900055554039137	0.215086793146301	unchanged	--	--	--	--	--	--	--	--	--	--	--	--	--	--	--	--
pos_1375	Phaeophorbide b	0.000149423863082705	0.000206605961466955	0.000132932608977143	0.000132244364865358	0.000155242634599261	0.00017091433106524	0.000269311673112893	0.000241852240413771	0.000137529256797135	0.000177755440418584	0.000192645867807034	0.000155638910445327	0.288199504802177	0.148739797969616	1.65887516004656	unchanged	--	--	--	--	--	--	--	--	--	--	--	--	--	--	--	--
pos_1376	Brassicoside	1.0054481960694e-05	1.16962725187996e-05	0	7.98012419853088e-06	9.71768486525661e-06	7.19593711026315e-06	0	0	0	6.89429874645566e-06	7.16181342852175e-07	0	-13.417457446312	0.0111360900545616	2.31779383227658	down	--	--	--	--	--	--	--	--	--	--	--	--	--	--	--	--
pos_1379	Cyclotricuspidoside C	7.77392250774873e-05	9.40483606809514e-05	0.000122511097266598	3.19403944603029e-05	9.04932048430892e-05	0.000100048525741076	2.06119197202191e-05	7.04253314938337e-05	4.2996249554783e-05	0.000123298862162946	9.28658533688427e-05	0.000102567568741046	-0.303530496194462	0.606286275976419	0.572574398025605	unchanged	--	--	--	--	--	--	--	--	--	--	--	--	--	--	--	--
pos_138	11-(4-acetoxymethylphenyl)-1α,25-dihydroxy-9,11-didehydrovitamin D3 / 11-(4-acetoxymethylphenyl)-1α,25-dihydroxy-9,11-didehydrocholecalciferol	0.00307162306466618	0.00354014715810102	0.00254830677685345	0.00319221571706638	0.00368773956450683	0.0031275528941251	0.00267903361422274	0.00290814239815041	0.00366051057399974	0.00365843118780879	0.00315445974843328	0.00277640563721515	-0.0264977952826762	0.823584465363816	0.304316256410043	unchanged	--	--	--	--	--	--	--	--	--	--	--	--	--	--	--	--
pos_1380	(R)-1-O-[b-D-Apiofuranosyl-(1->2)-b-D-glucopyranoside]-1,3-octanediol	3.8533823709197e-05	8.92111201940979e-06	3.36055727216099e-06	8.93930421140541e-05	1.24252103485763e-05	2.5110660341257e-05	2.77675418304424e-05	3.07455295139841e-05	3.95747349173901e-06	0.000120031862252035	4.15111999460586e-05	3.77139177942038e-05	0.71674081562607	0.516531686875121	0.553582175415772	unchanged	--	--	--	--	--	--	--	--	--	--	--	--	--	--	--	--
pos_1381	Araliasaponin III	2.49349552505218e-05	3.63332145908761e-05	4.73268578129351e-05	4.04423943027185e-05	3.15883599279883e-05	4.86669122471633e-05	4.15491509500115e-05	5.44700190339456e-05	4.95540982352512e-05	4.9075064340246e-05	4.55691760025956e-05	4.9763153662264e-05	0.371181941092248	0.0441686747092118	2.04748890170849	up	--	--	--	--	--	--	--	--	--	--	--	--	--	--	--	--
pos_1382	1-Lyso-2-arachidonoyl-phosphatidate	7.76268984074505e-06	3.16758228187999e-05	9.21120666325102e-07	1.02287799920914e-06	6.32221619147672e-07	5.45236247942563e-06	4.67720626791323e-07	1.15414333412603e-05	7.0478241718551e-06	1.71312029987501e-06	8.62272188364581e-06	2.79031438474011e-05	0.715904373706937	0.802021107670489	0.406697068696655	unchanged	--	--	--	--	--	--	--	--	--	--	--	--	--	--	--	--
pos_1383	3-Hexaprenyl-4-hydroxybenzoic acid	0.00252282694360387	0.00135399977874569	0.00125615210114881	0.00111134664783451	0.00136494687467216	0.00141317538142883	0.00143685247714904	0.00134027670508201	0.0014574985080816	0.00128968349326358	0.00136422772813082	0.00129998999729388	-0.086472470712307	0.537076462162447	0.758869507515996	unchanged	C13425	Ubiquinone and other terpenoid-quinone biosynthesis(ko00130)	LMPR02010045	-	3-Hexaprenyl-4-hydroxybenzoic acid	-	Prenol Lipids [PR]	Quinones and hydroquinones [PR02]	Ubiquinones [PR0201]	--	--	--	--	--	--	--
pos_1385	(Z)-6-(2-Methoxyvinyl)-7-methyl-2H-1-benzopyran-2-one	2.93920584981554e-06	2.68926007441298e-06	2.80390228039052e-06	2.63477613414478e-05	4.72595285324771e-06	4.94292311320814e-06	4.22979710440418e-06	6.75921830407586e-06	2.74767866217556e-06	3.69926393683203e-06	5.12638561747279e-06	1.28353345348789e-05	0.0812062433009864	0.724111616937865	0.444306863942022	unchanged	--	--	--	--	--	--	--	--	--	--	--	--	--	--	--	--
pos_1386	Yohimbine	6.44850184610335e-06	1.28514119654289e-05	1.78616975243178e-05	3.98289676486193e-06	9.69427562872753e-06	1.43166620884793e-05	2.96329475040052e-06	8.87541448168644e-06	4.07183893969935e-06	6.45148083356849e-05	1.4942324116472e-05	2.00757588680286e-05	0.223463350583362	0.42223890881293	0.808718763826666	unchanged	--	--	--	--	--	--	--	--	--	--	--	--	--	--	--	--
pos_1387	Lyoniresinol 9'-sulfate	3.08535465441221e-06	4.36112629158822e-06	1.83356285771595e-06	8.79837456478572e-06	1.64972708955126e-07	2.17453389570295e-06	8.27645202096129e-06	1.34003361273079e-06	1.06517403470054e-06	8.57703935342127e-06	2.80674415183221e-06	5.39292529443982e-07	0.162976452961033	0.854692101153716	0.237068561910393	unchanged	--	--	--	--	--	--	--	--	--	--	--	--	--	--	--	--
pos_1388	2,3-Dehydrosilybin	0	0	4.9564236760293e-06	8.5901054589374e-07	1.69888160291032e-07	0	0	2.09422619478384e-06	0	5.2066867750608e-06	0	3.17906709192295e-06	0.930446979463284	0.544067596838254	0.530663064519546	unchanged	--	--	--	--	--	--	--	--	--	HMDB0040513	Organic compounds	Lignans, neolignans and related compounds	Flavonolignans	_	5467200	25166-14-7
pos_1389	N-Ornithyl-L-taurine	5.96204382176876e-06	5.66769610115565e-06	2.97796051560321e-06	5.76885868273064e-06	5.55463672641555e-06	6.65789389596654e-06	6.22553634272795e-06	4.18881557049488e-06	5.26684746104937e-06	3.22861380077625e-05	1.11631703287356e-05	3.63854913717342e-06	0.511437162492463	0.316139440679919	1.00559910161123	unchanged	--	--	--	--	--	--	--	--	--	--	--	--	--	--	--	--
pos_1390	Polypropylene glycol (m w 1,200-3,000)	0.000118384729520067	0.000324743305284892	4.08872626528533e-05	5.07723036994431e-05	0.00014596073807235	0.000118214211779411	6.03008970572202e-05	5.29636032679468e-05	5.67750199523391e-05	5.54571809088907e-05	5.6122251592352e-05	4.68321649480113e-05	-0.950548041838884	0.120072257230512	1.49265487844424	unchanged	--	--	--	--	--	--	--	--	--	--	--	--	--	--	--	--
pos_1391	(+)-4,11-Eudesmadien-3-one	0.000205081204713271	0.000306509382455052	0.000403070812608325	0.00028677026593061	0.000350954639181389	0.000316237246173316	0.000286903720769829	0.000357878490225375	0.000280845161155917	0.000437252477602177	0.000336685785197329	0.000437396613291853	0.200545955378038	0.279829390232151	1.09838547999216	unchanged	--	--	--	--	--	--	--	--	--	--	--	--	--	--	--	--
pos_1392	6-Gingesulfonic acid	4.75208938254074e-05	8.04112672829539e-05	4.14503411315364e-05	5.70868383649864e-05	5.34230141338005e-05	4.99490811097614e-05	6.42993209612325e-05	5.25196030137494e-05	6.4838023985904e-05	5.63789184149961e-05	5.61003592355329e-05	4.44612007810351e-05	0.0586318447297316	0.824029006518015	0.400534382749179	unchanged	--	--	--	--	--	--	--	--	--	HMDB0038999	Organic compounds	Benzenoids	Phenols	Methoxyphenols	126890	145937-21-9
pos_1393	Murrayacinine	7.36305987918733e-06	1.71486937577001e-05	1.75732672666085e-05	4.75840353792433e-05	1.72063008455686e-05	2.32980803363806e-05	1.05922450286028e-05	1.83680249435241e-05	8.85157650162239e-06	1.03271040396871e-05	1.60330131228418e-05	4.56613723619494e-05	-0.283469561212337	0.679312905912145	0.413949971147392	unchanged	--	--	--	--	--	--	--	--	--	--	--	--	--	--	--	--
pos_1394	Nandrolone decanoate	0.000139457250575324	0.000174247360561005	0.000270380805770083	0.000254274820689011	0.000135111627790851	0.000187588088624909	0.000176575498449584	0.000211171561531781	0.000167055006041947	0.000205555001519346	0.000208075670080589	0.000269680744839691	0.12714134415033	0.653198065857808	0.459060017269052	unchanged	--	--	--	--	--	--	--	--	--	HMDB0002725	Organic compounds	Lipids and lipid-like molecules	Steroids and steroid derivatives	Estrane steroids	9904	434-22-0
pos_1396	Myristoylglycine	0.000142768116863129	0.000186646356196267	0.000172917240210142	0.00015820504838833	0.00013250174724531	0.000152143507383544	0.00014584165251344	0.000158407381944778	0.000173473488736085	0.000154471513975638	0.000151945523129179	0.000147912436145578	-0.0131511268712838	0.815408932990899	0.158139507710213	unchanged	--	--	--	--	--	--	--	--	--	HMDB0013250	Organic compounds	Organic acids and derivatives	Carboxylic acids and derivatives	Amino acids, peptides, and analogues	72348	_
pos_1397	Glucosylceramide (d18:1/12:0)	2.65911707281154e-05	1.37332970356156e-05	6.95819882434727e-06	1.21071728812781e-05	1.81379135113827e-05	1.68474768246097e-05	8.2194410937336e-05	3.95378746917453e-05	6.98886337784321e-06	2.47080764053181e-05	3.4338581581159e-05	1.24528382291068e-06	0.22532513606161	0.24559926096607	1.33663995608859	unchanged	--	--	--	--	--	--	--	--	--	--	--	--	--	--	--	--
pos_1398	Gemfibrozil	4.25034274246691e-05	5.31746026636744e-05	3.72814781927738e-05	4.2656282310661e-05	4.09883459991341e-05	3.92204388896029e-05	3.10966700280669e-05	3.86845975148939e-05	4.73275410381517e-05	3.92891622949329e-05	3.97238610570243e-05	5.23552650896038e-05	-0.0521136768119135	0.753561026361571	0.310236904824008	unchanged	--	--	--	--	--	--	--	--	--	HMDB0015371	Organic compounds	Benzenoids	Phenol ethers	_	3463	25812-30-0
pos_1399	Nepafenac	5.25720419294241e-05	7.63586896931866e-05	3.1725711643577e-05	5.24027536340587e-05	5.58811634304612e-05	4.96445403309895e-05	5.20071358031181e-05	4.62086970580991e-05	5.04951474517517e-05	5.75266748579212e-05	4.68590702623293e-05	3.5376134621047e-05	-0.113004301423828	0.468223283099724	0.662022786115898	unchanged	--	--	--	--	--	--	--	--	--	--	--	--	--	--	--	--
pos_14	Decanoic acid	8.72341904861399e-07	1.28076847728259e-06	2.86446709936845e-06	4.10845802779418e-06	2.99538296233773e-06	3.16988921531297e-06	3.54799515097164e-06	3.28141099553559e-06	3.65019464165561e-06	2.70894810953893e-06	3.74133783717818e-06	3.53914311987931e-06	0.601661476407255	0.151425446829973	1.50083232316245	unchanged	C01571	Metabolic pathways(ko01100);;Fatty acid biosynthesis(ko00061)	LMFA01010010	Capric acid	Decanoic acid	C10:0; Caprinic acid; Decoic acid; Decylic acid	Fatty Acyls [FA]	Fatty Acids and Conjugates [FA01]	Straight chain fatty acids [FA0101]	HMDB0000513	Organic compounds	Lipids and lipid-like molecules	Fatty Acyls	Fatty acids and conjugates	2969	59906-14-8
pos_140	(24R)-1α,24,25-trihydroxy-22-oxavitamin D3 / (24R)-1α,24,25-trihydroxy-22-oxacholecalciferol	0.000725802760022383	0.000503918261020971	0.000476495549673714	0.000606214314634699	0.000468334289480201	0.000573192427469647	0.000622162502390334	0.000917976341366234	0.000745895634078685	0.000537248937726507	0.000803244960149637	0.00130789714618476	0.513952329306147	0.0658618864084315	1.84824726156562	unchanged	--	--	--	--	--	--	--	--	--	--	--	--	--	--	--	--
pos_1400	(±)-(Z)-2-(5-Tetradecenyl)cyclobutanone	0.0136869845971094	0.0205875463456008	0.0184105544930216	0.0197947455156409	0.0151575713392229	0.0157125505671298	0.0117520446741079	0.0161335432430645	0.0181678577313539	0.0152919984637677	0.0173533986361573	0.0162338653995277	-0.120136326969899	0.358127858664269	0.973797180162518	unchanged	--	--	--	--	--	--	--	--	--	--	--	--	--	--	--	--
pos_1401	Chlorprothixene	0.000477937932386951	0.000137791279467944	0.000154675202051936	0.000118271482628789	0.000273894889113452	0.000279135031140794	0.000247602494008394	0.000220925308016467	0.000182818189914009	0.000186546092693689	0.000211566494969743	0.000200963490140788	-0.0359444450391351	0.593613420497793	0.645107528160213	unchanged	--	--	--	--	--	--	--	--	--	--	--	--	--	--	--	--
pos_1402	(E,E)-11,13-Octadecadien-9-ynoic acid	0.000151585544599397	0.000195955818073042	0.000181503600402172	0.000176196950167957	0.00015063652819877	0.000177616104988897	0.000201969805855275	0.000189037083223811	0.000197962916260091	0.000170442908957652	0.000185319707241882	0.000164265782977297	0.104282369845254	0.215071941988183	1.45368796136568	unchanged	--	--	--	--	--	--	--	--	--	--	--	--	--	--	--	--
pos_1403	PE(14:0/P-18:0)	0.00607455983589868	0.00676178218458976	0.00680735785038745	0.00352954376692546	0.00322008672234822	0.00509691608259597	0.00226511916412327	0.00444004671895304	0.00411842229003799	0.00363511354087203	0.00429576025309229	0.00616907062951013	-0.336877263579018	0.216304987572048	1.22804519694737	unchanged	--	--	--	--	--	--	--	--	--	--	--	--	--	--	--	--
pos_1404	Haloperidol glucuronide	3.86778959094141e-06	1.49046159881476e-06	3.01136244634738e-07	1.04372578064994e-06	3.50862047660615e-06	2.34029552167867e-06	3.01949625035258e-06	1.33915161065539e-06	1.36376694574029e-06	1.23206790121027e-06	1.85967431214129e-06	1.03849906310489e-05	0.523448323530655	0.505172072826935	0.763042832159654	unchanged	--	--	--	--	--	--	--	--	--	--	--	--	--	--	--	--
pos_1405	3-Nonyl-1H-pyrazole	3.59184521611174e-05	3.99513079773181e-05	2.68845216465845e-05	3.27781641715589e-05	5.33968577159656e-05	2.64527138168968e-05	3.60222831901359e-05	3.58681963882764e-05	4.12912004505729e-05	2.65539713024974e-05	3.35540549825908e-05	4.10845821956566e-05	0.0214652824300536	0.972163617360282	0.073525951711764	unchanged	--	--	--	--	--	--	--	--	--	--	--	--	--	--	--	--
pos_1406	Patuletin 3-gentiobioside	0.0005358755494294	0.000140999727690652	0.000143050680553857	0.00011535507795624	0.00030954156176188	0.000308184013517262	0.000271852027999197	0.000229324236629694	0.000186558771701023	0.000203187045691415	0.000229977543762353	0.00021073361013034	-0.00909348779080332	0.603213133681047	0.624611735627955	unchanged	--	--	LMPK12112893	Patuletin 3-gentiobioside	-	-	Polyketides [PK]	Flavonoids [PK12]	Flavones and Flavonols [PK1211]	--	--	--	--	--	--	--
pos_1407	21-Deoxycortisol	5.18855724099993e-05	6.79199437292507e-05	0.000469484921772352	4.89162292712085e-05	4.87536631886777e-05	6.11622150866823e-05	0.00018190384911729	0.0002142192943961	6.50062299058375e-05	0.000219815959119168	0.000370299957269009	6.19503530038587e-05	0.95433629881412	0.484851746184211	0.662135352724074	unchanged	C05497	Steroid hormone biosynthesis(ko00140)	LMST02030195	21-Deoxycortisol	11beta,17alpha-dihydroxypregn-4-ene-3,20-dione	-	Sterol Lipids [ST]	Steroids [ST02]	C21 steroids (gluco/mineralocorticoids, progestogins) and derivatives [ST0203]	--	--	--	--	--	--	--
pos_1408	PE(22:5(7Z,10Z,13Z,16Z,19Z)/dm18:1(9Z))	0.000318633126348585	0.000416452668446025	0.000537908005592419	0.000392698300311282	0.000307323035793485	0.000362414567739016	0.00033250011599045	0.000404156794748062	0.000429616260718163	0.000322871504174112	0.000392113260425972	0.000387928911270317	-0.0231475126559957	0.781163058414757	0.293193499243251	unchanged	--	--	--	--	--	--	--	--	--	--	--	--	--	--	--	--
pos_1409	13-Nor-6-eremophilene-8,11-dione	2.34089967837454e-05	2.92703862385402e-05	2.59232366198029e-05	2.51849466616745e-05	1.91709423452221e-05	2.40741222220352e-05	2.15181906830996e-05	2.45844381075372e-05	2.45325858475857e-05	2.27379808367324e-05	2.48740718624218e-05	2.22568471809125e-05	-0.0562865538878565	0.485101102548424	0.661480584732627	unchanged	--	--	--	--	--	--	--	--	--	--	--	--	--	--	--	--
pos_141	2,2,4,4,6,6-Hexamethyl-1,3,5-trithiane	2.7315854878403e-05	3.0896373119871e-05	2.8780594031392e-05	2.76599478468852e-05	2.64641948937256e-05	3.0802103605661e-05	2.90485952422033e-05	2.99687639523779e-05	3.03876586517139e-05	2.7568468786667e-05	2.94910524081698e-05	2.54741952418978e-05	0.000100833071574158	0.997607983289732	0.177215664003495	unchanged	--	--	--	--	--	--	--	--	--	--	--	--	--	--	--	--
pos_1410	S-Japonin	9.71708229583566e-05	0.000111902191277403	0.000114885981956088	0.000102064926532246	8.38251442898298e-05	0.000106638841296889	6.79614593548627e-05	9.64876052526072e-05	0.000109279891068432	7.9983547623316e-05	0.00010375299449096	0.000110555795503347	-0.132296048135258	0.362384636323055	0.947116661830422	unchanged	--	--	--	--	--	--	--	--	--	--	--	--	--	--	--	--
pos_1411	Carvyl acetate	0.000281282565115092	0.000317042029006708	0.000299938339572597	0.000310218203202648	0.000256934178059219	0.000291235701865309	0.000285782633120436	0.000303737549476096	0.00029386581841357	0.000287184828049044	0.000298838582123826	0.00029298945854252	0.0078110379966958	0.921350476628627	0.194964397229149	unchanged	--	--	--	--	--	--	--	--	--	--	--	--	--	--	--	--
pos_1412	N-[(4E,8Z)-1,3-dihydroxyoctadeca-4,8-dien-2-yl]hexadecanamide 1-glucoside	6.33368410011311e-05	7.32880846793761e-05	0.000306931813704299	8.93346301373953e-05	6.37478113824632e-05	0.000102731766646412	5.07831606335262e-05	8.48761933690261e-05	6.4963332544345e-05	5.15622318717536e-05	8.61203090004835e-05	0.000191627615490944	-0.301106348657772	0.541246595054066	0.653812785179717	unchanged	--	--	--	--	--	--	--	--	--	--	--	--	--	--	--	--
pos_1413	3-Carboxy-2,3,4,9-tetrahydro-1H-pyrido[3,4-b]indole-1-propanoic acid	1.68642401286173e-05	2.64248257985128e-05	2.66534190805228e-05	2.31610548018973e-05	1.83217033170653e-05	2.25747690951709e-05	1.90531723205353e-05	2.24639456198562e-05	2.45926285021102e-05	2.2028479153388e-05	2.09168980885557e-05	1.89355672565866e-05	-0.0515236235686185	0.608721484588149	0.465889283743656	unchanged	--	--	--	--	--	--	--	--	--	--	--	--	--	--	--	--
pos_1414	Temsirolimus	4.44252181290654e-06	8.51425680552953e-06	1.06058280130606e-05	5.87255973595387e-06	2.77903257403155e-06	8.88042792350293e-06	5.0902754262607e-06	9.50519036546963e-06	5.39640316676741e-06	8.23997367213829e-06	1.08536583522035e-05	1.47977859059105e-05	0.428544963871207	0.293670592608591	1.15484335367513	unchanged	--	--	--	--	--	--	--	--	--	--	--	--	--	--	--	--
pos_1415	trans-S-(1-Propenyl)-L-cysteine	1.00962632234265e-05	1.39767077848365e-05	9.74432823574698e-06	1.33766721863117e-05	2.03520517645275e-05	1.55234300980372e-05	1.55987702967491e-05	1.30098164449847e-05	1.73725105071152e-05	2.06846410137802e-05	1.43451283263212e-05	1.24310471306385e-05	0.193681045551468	0.415348114792344	0.861072646456351	unchanged	--	--	--	--	--	--	--	--	--	--	--	--	--	--	--	--
pos_1416	Ustiloxin A	1.95941392294346e-05	2.15490776012567e-05	2.053886257447e-06	2.06806474879969e-05	1.23202706812642e-05	1.45556154669689e-05	1.09096801294586e-05	5.99054979302188e-06	1.99129687168756e-07	2.87668817690254e-05	8.11719767153633e-06	2.09524117012354e-06	-1.49674928150791	0.291810437860981	1.08659044857255	unchanged	--	--	--	--	--	--	--	--	--	HMDB0039640	Organic compounds	Organic acids and derivatives	Carboxylic acids and derivatives	Amino acids, peptides, and analogues	4480102	141044-51-1
pos_1417	Ursonic acid	0.00372727035375964	0.00208588783256993	0.00229606312251254	0.00142193192308578	0.00111634189418271	0.00153883988076728	0.00178833742837957	0.0016410687015265	0.0019664402654644	0.00152948243871405	0.00153920222350909	0.00218104526261526	-0.0928884661525533	0.542960394554467	0.715856289237922	unchanged	--	--	--	--	--	--	--	--	--	--	--	--	--	--	--	--
pos_1419	Lysyl-Valine	5.80926537704282e-07	4.16649503382433e-07	0	5.61097088673743e-07	1.57590578792141e-07	4.52259700699055e-07	1.09832503656776e-06	7.60868640609944e-06	1.05115872883216e-06	1.0193306834001e-06	6.79210217549946e-06	1.48362709209945e-05	6.46286704932091	0.0756440717002491	1.87192010746225	unchanged	--	--	--	--	--	--	--	--	--	HMDB0028964	Organic compounds	Organic acids and derivatives	Carboxylic acids and derivatives	Amino acids, peptides, and analogues	6992341	20556-11-0
pos_142	Kazinol E	0.000260933917392523	0.000316028710731955	0.000330874953366578	0.000280656893341279	0.000232463031851669	0.000265509146408973	0.000271853485133268	0.000298372154618967	0.000294922222505039	0.000286142502239049	0.000268102298470207	0.00028395320253425	0.0234751289943613	0.864063148198228	0.236186714712888	unchanged	--	--	LMPK12020237	Kazinol E	-	-	Polyketides [PK]	Flavonoids [PK12]	Flavans, Flavanols and Leucoanthocyanidins [PK1202]	--	--	--	--	--	--	--
pos_1421	DG(22:1(13Z)/22:6(4Z,7Z,10Z,13Z,16Z,19Z)/0:0)	0.00194937887700943	0.00298057290385279	0.00258016317010493	0.00257125254207051	0.00203883161756703	0.00240836535992201	0.00218715896937978	0.00224942362537646	0.00275121162099079	0.00210398624717277	0.002359164166568	0.00201890870935798	-0.0801128923112717	0.467678860660441	0.635954136680291	unchanged	--	--	--	--	--	--	--	--	--	HMDB0007643	Organic compounds	Lipids and lipid-like molecules	Glycerolipids	Diradylglycerols	9543962	_
pos_1422	Ciprofloxacin	2.50695161742949e-06	2.09143916317985e-06	2.14831770818233e-06	9.70820131563611e-07	2.91470428962713e-06	1.99563974116143e-06	2.51645980768433e-06	1.65445501434722e-06	2.16481332228005e-06	2.84881508724646e-06	1.52734191520034e-06	2.98233361373026e-06	0.146451105135519	0.635378607720483	0.533746198530068	unchanged	C05349	ABC transporters(ko02010)	--	--	--	--	--	--	--	--	--	--	--	--	--	--
pos_1423	PI(16:0/20:2(11Z,14Z))	0.000451645536934755	0.000239086105730576	0.000223612594032521	0.000199709308635109	0.000258291427474514	0.000271430259227628	0.000283908063983365	0.000254363297639658	0.000253225245247888	0.000227181418422569	0.000250487190971992	0.000248414064673109	-0.0645235796927182	0.599672582691287	0.627037968048377	unchanged	--	--	LMGP06010165	PI(16:0/20:2(11Z,14Z))	1-hexadecanoyl-2-(11Z,14Z-eicosadienoyl)-glycero-3-phospho-(1'-myo-inositol)	PI(36:2); PI(16:0_20:2)	Glycerophospholipids [GP]	Glycerophosphoinositols [GP06]	Diacylglycerophosphoinositols [GP0601]	HMDB0009786	Organic compounds	Lipids and lipid-like molecules	Glycerophospholipids	Glycerophosphoinositols	_	_
pos_1424	Dimethylbenzyl carbinyl hexanoate	2.61199187498536e-05	3.04675540844145e-05	3.89943592105319e-05	4.04256320262097e-05	3.99108058748449e-05	3.59464789884733e-05	3.76081749306729e-05	4.08795048943768e-05	3.7734694879279e-05	3.61454723192851e-05	3.65117649683873e-05	3.83577528051271e-05	0.117736740237353	0.341155993914558	0.97945238112159	unchanged	--	--	--	--	--	--	--	--	--	--	--	--	--	--	--	--
pos_1425	Hydroxyhomodestruxin B	0.000895887155734537	0.000484960962334095	0.00042730325305655	0.000382482872206491	0.000440777250460541	0.000507367032503551	0.000524976442294909	0.000488777860998454	0.000475527515127428	0.000435278333814951	0.000460005126719515	0.00046052840491012	-0.0828469822499329	0.555023114853481	0.694052236669601	unchanged	--	--	--	--	--	--	--	--	--	HMDB0039897	Organic compounds	Organic acids and derivatives	Peptidomimetics	Depsipeptides	85262217	_
pos_1426	DG(20:5(5Z,8Z,11Z,14Z,17Z)/22:0/0:0)	4.55946621097985e-06	4.48234601909865e-06	2.23662808495101e-06	0	1.13876770129807e-06	0	8.87681700629777e-07	7.30840607897929e-07	0	1.5300939836399e-06	0	3.19222856908632e-06	-0.672998421194734	0.330246910371783	0.994788256421739	unchanged	--	--	--	--	--	--	--	--	--	HMDB0007579	Organic compounds	Lipids and lipid-like molecules	Glycerolipids	Diradylglycerols	9543909	_
pos_1427	Erythrohydrobupropion	4.80657260613842e-05	9.05271118975394e-05	5.94553037187002e-05	4.30059997401419e-05	6.46634519806556e-05	6.45324593104561e-05	4.146495687853e-05	5.48972544949759e-05	2.99283787918882e-05	9.57284104939816e-05	5.95807425554096e-05	8.05936269724254e-05	-0.094679617004477	0.913822351092706	0.0320498499008222	unchanged	--	--	--	--	--	--	--	--	--	HMDB0012227	Organic compounds	Benzenoids	Benzene and substituted derivatives	Phenylpropanes	445	_
pos_1428	Phenylalanyl-Valine	0.000274735337700586	0.000325439656776066	0.00014958567199912	0.000213165716057321	0.000316867269241765	0.000260191586113282	0.000378162369558615	0.000272677800874275	0.000195171005299132	0.00026151702435539	0.000265986437914571	0.000197094135900606	0.0385418811881379	0.897032744475203	0.295023597737427	unchanged	--	--	--	--	--	--	--	--	--	HMDB0029008	Organic compounds	Organic acids and derivatives	Carboxylic acids and derivatives	Amino acids, peptides, and analogues	7359121	3918-90-9
pos_1429	5-Taurinomethyl-2-thiouridine	1.98406885052625e-07	0	3.64036886042437e-05	5.41765593965526e-06	7.13762865769611e-07	5.94792938132178e-06	1.37749174347705e-05	1.21149173586827e-05	2.07764125951192e-06	4.18241254994777e-07	9.63720132814341e-06	1.47889056684228e-05	4.87130686453479	0.915872257421783	0.130294914926998	unchanged	--	--	--	--	--	--	--	--	--	HMDB0011610	Organic compounds	Nucleosides, nucleotides, and analogues	Pyrimidine nucleosides	_	53481004	497258-54-5
pos_143	4-Propylphenol	1.78411908643306e-05	4.77748789948398e-05	2.40252147261781e-05	1.85515719120548e-05	3.57938920748589e-05	2.70576283803588e-05	2.40140879105685e-05	2.31592963061077e-05	1.89432357989266e-05	3.64271560192121e-05	2.26742491684904e-05	2.1171355080781e-05	-0.166327622941576	0.463018686390524	0.629009216011699	unchanged	--	--	--	--	--	--	--	--	--	--	--	--	--	--	--	--
pos_1430	PC(20:4(5Z,8Z,11Z,14Z)/18:0)	3.04019721285508e-05	1.13200268662948e-05	1.27021904646864e-05	5.51533224624606e-05	6.0165930369644e-05	2.21702668495888e-05	5.34315531671597e-05	2.23622650244671e-05	8.1694445830069e-06	1.38327138714235e-05	2.21562653149535e-05	6.44357210471336e-06	-0.676723430573759	0.35029393658743	1.00179976729889	unchanged	C00157	Arachidonic acid metabolism(ko00590);;Linoleic acid metabolism(ko00591);;Glycerophospholipid metabolism(ko00564);;Metabolic pathways(ko01100);;alpha-Linolenic acid metabolism(ko00592);;Choline metabolism in cancer(ko05231);;Retrograde endocannabinoid signaling(ko04723)	LMGP01011907	PC(20:4(5Z,8Z,11Z,14Z)/18:0)	1-(5Z,8Z,11Z,14Z-eicosatetraenoyl)-2-octadecanoyl-glycero-3-phosphocholine	PC(38:4); PC(18:0_20:4)	Glycerophospholipids [GP]	Glycerophosphocholines [GP01]	Diacylglycerophosphocholines [GP0101]	HMDB0008431	Organic compounds	Lipids and lipid-like molecules	Glycerophospholipids	Glycerophosphocholines	52923291	_
pos_1431	Niazimicin A	0.000139478196403485	0.000140232466046002	0.000145264041795434	0.000132751667076805	0.000135631218984116	0.000140809495101008	0.000101994699532006	0.000134225701024944	0.000158291902281442	0.000118750350793208	0.000133975134490186	0.000160657068716216	-0.0631795755311444	0.659570496472423	0.537716835271317	unchanged	--	--	--	--	--	--	--	--	--	HMDB0031944	Organic compounds	Organic oxygen compounds	Organooxygen compounds	Carbohydrates and carbohydrate conjugates	10247749	147821-49-6
pos_1432	Goshonoside F3	5.59293455279314e-05	7.65688896979071e-05	8.25044088866702e-05	7.0393814916351e-05	7.42032617588857e-05	7.12186968812788e-05	6.05704270500826e-05	5.95658368497939e-05	6.17093190887472e-05	5.44749631189395e-05	7.04236711333495e-05	6.50439455868172e-05	-0.207061117475236	0.0485318624253607	1.8332207990078	down	--	--	--	--	--	--	--	--	--	--	--	--	--	--	--	--
pos_1433	3-Hydroxy-1-phenyl-1-hexadecanone	0.000518425994795781	0.000235444025996873	0.000301407774482569	0.000254614809597739	0.000351826523135804	0.000367281203785349	0.000159529846376317	0.000248133412945093	0.000233289164279591	0.000142679032145728	0.000309627291370091	0.000241269437658232	-0.603381937484322	0.0443674428604515	2.06897841574699	down	--	--	--	--	--	--	--	--	--	--	--	--	--	--	--	--
pos_1434	Salviaflaside	0.000992764592237792	0.000973770939158533	2.34873176818525e-05	0.000593033460751	0.00105425588001819	0.000695105137800081	1.786934163129e-05	1.93499548715374e-05	1.74591784618121e-05	0.000683988168007077	0.000142304531724802	4.16647037278124e-05	-3.10343619686685	0.0161574333228049	2.24631804078918	down	--	--	--	--	--	--	--	--	--	--	--	--	--	--	--	--
pos_1435	Olopatadine n-oxide	6.86725863378854e-06	5.21884366312044e-06	1.33767283311509e-05	2.86000372497837e-06	4.14455991407715e-06	1.23701968629965e-05	3.45687915362548e-06	3.42366351996854e-06	1.51298485756461e-05	1.48655250576978e-05	2.78613008268273e-06	4.3134747976523e-06	-0.189300331745574	0.963115878071371	0.0613114703858921	unchanged	--	--	--	--	--	--	--	--	--	--	--	--	--	--	--	--
pos_1436	Aflatoxin B1 dialcohol	0.000445445989379767	0.000816052949230896	0.000408308757898333	0.000530585405319597	0.000650526124794848	0.000538791657779086	0.000438287992537197	0.000401869125262863	0.000755083222010888	0.000544121038486897	0.000540054385978997	0.000451979850919408	-0.107326993850807	0.603018038629226	0.466120650313263	unchanged	--	--	--	--	--	--	--	--	--	--	--	--	--	--	--	--
pos_1437	(24E)-3alpha,15alpha-Diacetoxy-23-oxo-7,9(11),24-lanostatrien-26-oic acid	0.00349889040344954	0.00495391871603615	0.0031719960686941	0.00290366999179442	0.0026390831179657	0.00325638390463585	0.00274525396830345	0.00308464343475361	0.00346925739161279	0.00292436426394281	0.00316419591273775	0.00282479567109977	-0.139544171554679	0.332349725615978	0.899121934335392	unchanged	--	--	--	--	--	--	--	--	--	--	--	--	--	--	--	--
pos_1438	Isometheptene	9.73542520159421e-05	0.00010437843257906	3.76651217656453e-05	0.00015091296186761	8.08352729451344e-06	7.10072129077629e-05	9.69744316466603e-05	6.70861878063754e-05	1.17726796441373e-05	0.000158100604737809	7.81340096292719e-05	4.23671815246446e-05	0.0456399201105153	0.933469645381025	0.0815093913040086	unchanged	--	--	--	--	--	--	--	--	--	HMDB0015651	Organic compounds	Organic nitrogen compounds	Organonitrogen compounds	Amines	22297	503-01-5
pos_1439	Glutamyl-Phenylalanine	0.000238292316763963	0.000286778574132965	0.000143006439524929	0.000217965631209045	0.000203191968138086	0.000208197110069296	0.000185575992501548	0.000167793897779353	0.000180060744194065	0.000238879577719562	0.000185992082461225	0.00016486322077723	-0.188944256963085	0.225623592267932	1.18233877820466	unchanged	--	--	--	--	--	--	--	--	--	HMDB0029156	Organic compounds	Organic acids and derivatives	Carboxylic acids and derivatives	Amino acids, peptides, and analogues	18653118	20556-22-3
pos_144	Ethyl 3-(methylthio)propanoate	7.22908400399026e-06	9.56182153976499e-06	4.45506246763293e-06	6.87363163275651e-06	5.69833954476718e-06	4.77117607453887e-06	6.67674925135422e-06	6.15271632854029e-06	6.53632366628727e-06	7.19579643800773e-06	6.29473807187495e-06	7.4912397116021e-05	0.664129836131998	0.358503187236715	1.04361602498725	unchanged	--	--	--	--	--	--	--	--	--	HMDB0040413	Organic compounds	Organic acids and derivatives	Carboxylic acids and derivatives	Carboxylic acid derivatives	61592	13327-56-5
pos_1440	Ethyl glucuronide	9.92559823142782e-06	1.50063257821066e-05	8.17576384341854e-06	1.26223372240964e-05	1.13281987567802e-05	1.05794357146965e-05	1.1412070638197e-05	1.04157601938623e-05	1.29342809857649e-05	1.17552234771556e-05	1.14817231237669e-05	7.96964130449787e-06	-0.0259376665626085	0.819127354504048	0.161397338963248	unchanged	--	--	--	--	--	--	--	--	--	HMDB0131286	Organic compounds	Organic oxygen compounds	Organooxygen compounds	Carbohydrates and carbohydrate conjugates	21845293	_
pos_1441	4-Deoxyannoreticuin	3.67945462582968e-05	1.45047963159538e-06	1.29971125837907e-06	1.61094540375955e-06	1.85200085552307e-08	3.57192277937502e-07	7.06569193340622e-07	1.39613412817037e-06	3.06414344504459e-07	5.8290464824084e-07	7.87917344586548e-07	4.87147863099091e-07	-0.575045750353841	0.346690707599055	1.15762822115439	unchanged	--	--	--	--	--	--	--	--	--	--	--	--	--	--	--	--
pos_1442	DG(16:0/18:1(11Z)/0:0)	0.00047971170460823	0.00045598432015738	0.000505165499736643	0.000463929202416089	0.000325035648823167	0.000443763479555213	0.000372235343578963	0.000424816666680195	0.000508561403829601	0.000382181220930233	0.00042088198656314	0.000381436362981082	-0.0972681834343305	0.376439677559742	0.964955370235276	unchanged	C00165	Th17 cell differentiation(ko04659);;Regulation of lipolysis in adipocytes(ko04923);;Thyroid hormone signaling pathway(ko04919);;Axon regeneration(ko04361);;Th1 and Th2 cell differentiation(ko04658);;Relaxin signaling pathway(ko04926);;Gastric acid secretion(ko04971);;Insulin resistance(ko04931);;Pathways in cancer(ko05200);;Neurotrophin signaling pathway(ko04722);;Phospholipase D signaling pathwa…	LMGL02010307	DG(16:0/18:1(11Z)/0:0)	1-hexadecanoyl-2-(11Z-octadecenoyl)-sn-glycerol	DG(16:0/18:1/0:0)	Glycerolipids [GL]	Diradylglycerols [GL02]	Diacylglycerols [GL0201]	HMDB0007101	Organic compounds	Lipids and lipid-like molecules	Glycerolipids	Diradylglycerols	9543972	_
pos_1443	Amikacin	1.48026104285618e-05	5.84231531342804e-06	2.23080776978103e-05	3.82790248831603e-05	1.60217276313887e-05	2.04586130487497e-05	4.06747556049016e-05	2.36087572698905e-05	7.22383155703889e-06	2.42155795404148e-05	2.69849913803945e-05	1.44389440195688e-05	0.239171306525709	0.624544211837373	0.514292286184404	unchanged	--	--	--	--	--	--	--	--	--	--	--	--	--	--	--	--
pos_1444	Vanillic acid-4-O-glucuronide	5.57019587481693e-05	8.43034361349733e-05	5.26199981646856e-05	7.70092838835187e-05	6.17190958427398e-05	6.18919721666037e-05	6.14017246035174e-05	6.20536332653763e-05	7.3051967367023e-05	6.80045064987503e-05	6.44656616997701e-05	4.69605016144348e-05	-0.0571842062131438	0.654210941927342	0.415259834341364	unchanged	--	--	--	--	--	--	--	--	--	HMDB0060024	Organic compounds	Organic oxygen compounds	Organooxygen compounds	Carbohydrates and carbohydrate conjugates	101579718	18191-12-3
pos_1445	Koryoginsenoside R1	0.00130947633871794	0.000540023530760108	0.000448677721101859	0.000457489961339681	0.00090791725863714	0.00091843260165972	0.00102428346833605	0.000732343403528805	0.00063761172322785	0.000731455414957518	0.000767404725912712	0.000758739382340593	0.125168151980059	0.940334507743357	0.0824740140804242	unchanged	--	--	--	--	--	--	--	--	--	HMDB0041351	Organic compounds	Lipids and lipid-like molecules	Prenol lipids	Triterpenoids	131753115	171674-97-8
pos_1446	Alanyl-Hydroxyproline	1.7382559074019e-05	2.49684940363453e-05	1.94663229958678e-06	1.62744431428987e-05	1.78264609152552e-05	1.34447859824585e-05	1.07028923273481e-06	1.7428096494242e-06	5.75051457643992e-07	2.70433295514558e-05	6.03490324589901e-06	3.22781196473988e-06	-2.08496311784575	0.127256564870498	1.542549977476	unchanged	--	--	--	--	--	--	--	--	--	--	--	--	--	--	--	--
pos_1447	3-alpha-Androstanediol glucuronide	0.00156016193484195	0.00146747546184149	0.00169604194534389	0.0019747651947715	0.00121521239066344	0.00160212775828501	0.0021028801180075	0.00328448839939032	0.00156393397906907	0.00154203061915042	0.00270236894317677	0.00629668142426586	0.70779663600471	0.128958900487831	1.63899279860554	unchanged	--	--	LMST05010039	3-alpha-androstanediol glucuronide	-	-	Sterol Lipids [ST]	Steroid conjugates [ST05]	Glucuronides [ST0501]	HMDB0010339	Organic compounds	Alkaloids and derivatives	Morphinans	_	24883428	_
pos_1448	Valyl-Isoleucine	2.1986586789826e-05	3.3555346675685e-05	3.84643472431875e-05	2.96412362651269e-05	8.18774435053564e-05	3.46249901711134e-05	3.1339622064845e-05	4.04414218554274e-05	6.18140091466301e-05	3.05969854256309e-05	4.06810974346567e-05	5.30272506197202e-05	0.186110653952612	0.775400783474608	0.242744148105566	unchanged	--	--	--	--	--	--	--	--	--	HMDB0029130	Organic compounds	Organic acids and derivatives	Carboxylic acids and derivatives	Amino acids, peptides, and analogues	7010531	20556-14-3
pos_1449	Isofucosterol glucoside	0.000103243618503701	7.83937194420573e-05	1.96737453416548e-06	4.51110998867978e-06	1.92272262493809e-06	4.89880844634856e-05	3.78323754798253e-06	3.36367223595415e-06	3.37097580768196e-06	3.3183485001123e-06	2.95540915838002e-06	4.39617167286922e-06	-1.97282381867669	0.0996215497184126	1.68084858985811	unchanged	--	--	--	--	--	--	--	--	--	--	--	--	--	--	--	--
pos_145	Lactarofulvene	2.28982074371825e-05	2.90895867919958e-05	2.99978350687773e-05	2.30648703536848e-05	2.01210731200835e-05	2.64766459691888e-05	1.99496003966507e-05	2.44689026269598e-05	2.21747618872663e-05	2.95228188180133e-05	2.62647899278384e-05	2.62308571327497e-05	-0.0262112210348651	0.814603568180111	0.204738794581408	unchanged	--	--	--	--	--	--	--	--	--	--	--	--	--	--	--	--
pos_1451	Polypodosaponin	3.56497328012115e-06	4.90814608097661e-06	1.86369517319443e-05	0	4.17549076894032e-06	5.42184636354355e-06	0	1.21819993721312e-06	0	1.77536965426426e-05	3.07693996146021e-06	8.10847002664054e-06	-4.34050567082928	0.783049937943697	0.337285560803145	unchanged	--	--	--	--	--	--	--	--	--	--	--	--	--	--	--	--
pos_1452	2-Methyl-2-phenyl-undecane	5.51703742215851e-05	6.06306328854297e-05	5.6012205209551e-05	6.07470863076723e-05	5.34374185239403e-05	6.14743794270948e-05	5.9223691788947e-05	6.21984171884682e-05	5.35041466488998e-05	6.2921727920686e-05	5.87521091165813e-05	5.90480604124604e-05	0.0337431556086951	0.501836685500281	0.835668542896315	unchanged	--	--	--	--	--	--	--	--	--	--	--	--	--	--	--	--
pos_1453	Alliospiroside C	1.8306323272196e-05	1.10269284012528e-05	2.53884692892191e-06	7.01990120642511e-06	5.1599383931059e-06	5.95249274722118e-06	5.61448628660907e-06	4.37392946335754e-06	2.76904833344519e-06	2.58362754015176e-06	4.44379067469533e-06	1.82181262946048e-06	-1.04661056723014	0.0954034005122799	1.76281620641034	unchanged	--	--	--	--	--	--	--	--	--	--	--	--	--	--	--	--
pos_1455	(E,E,E)-Sylvatine	0.005156100627607	0.00212783895325885	0.00183007180226311	0.0017323425869552	0.00335436293290007	0.00335250719431764	0.00361139688880948	0.00272336836562363	0.00251631728188281	0.00264730476813082	0.00269549300920425	0.00272828947524702	0.0501266701923324	0.857128665690061	0.213641916688489	unchanged	--	--	--	--	--	--	--	--	--	--	--	--	--	--	--	--
pos_1457	2-Methyl-1-propanethiol	3.87091255920347e-05	6.00497397677017e-05	4.02110838358465e-05	3.798429600696e-05	5.00701044968743e-05	3.92214519345502e-05	3.90871553295008e-05	4.00773050398752e-05	4.54491040055343e-05	3.75695925809917e-05	3.89317313851007e-05	4.42693179900766e-05	-0.0994782264138543	0.400474563592866	0.761706716010054	unchanged	--	--	--	--	--	--	--	--	--	--	--	--	--	--	--	--
pos_1459	Amitriptyline	6.64360117622537e-05	6.22507220680008e-05	4.74664267894667e-05	5.17095859048296e-05	5.12544387240314e-05	5.33844626835507e-05	4.46652007767236e-05	4.45609595969707e-05	5.61927392043636e-05	5.33999646576313e-05	4.87146548623488e-05	4.58011059214922e-05	-0.176599960438894	0.103254899054705	1.66059362603671	unchanged	--	--	--	--	--	--	--	--	--	--	--	--	--	--	--	--
pos_146	5,4'-DIMETHOXY-7-HYDROXYFLAVONE	9.76625929954469e-05	3.86868543343806e-05	9.24082529346755e-05	4.7513502483356e-06	4.5595000836264e-05	4.65300654160622e-05	5.90603197597709e-06	1.9084844394594e-05	3.08347191768599e-06	0.000101716819404861	1.98022489013428e-05	6.13341037351045e-05	-1.05949388671315	0.391565450904141	0.987931386708294	unchanged	--	--	--	--	--	--	--	--	--	--	--	--	--	--	--	--
pos_1460	(S)-Pterosin K	4.54610144685102e-05	4.7945878947958e-05	1.62533822646223e-05	3.25091546576116e-05	3.32445327157844e-05	3.28988709829566e-05	3.17115890652437e-05	2.70860477506513e-05	4.05826510189553e-05	2.20714053374937e-05	3.39689411279222e-05	3.02548413345463e-05	-0.111965656676995	0.496213158636338	0.645203103646662	unchanged	--	--	--	--	--	--	--	--	--	--	--	--	--	--	--	--
pos_1461	2-(3-Phenylpropyl)pyridine	5.3326205846522e-06	6.55618294135143e-06	5.95783836523769e-06	6.96900780441084e-06	4.27802300596761e-06	4.58627987233314e-06	5.12351201604764e-06	3.90733545309731e-06	5.55656203694149e-06	5.42877377159833e-06	6.10279084062323e-06	4.48066913720659e-06	-0.131065208580136	0.369780379282129	0.949336703546404	unchanged	--	--	--	--	--	--	--	--	--	--	--	--	--	--	--	--
pos_1462	2-Ethyl-4-(2-furanyl)-2-propenal	0.000204872605409028	0.000158115370892441	0.000178145241328375	0.000121565580424783	0.00015021976019087	0.000152839495749657	0.000143068379426793	0.000155916786264633	0.000137483439804246	0.000180031572890826	0.000157909877383695	0.000172132959541439	-0.0169952975535654	0.815610312526196	0.344890608506235	unchanged	--	--	--	--	--	--	--	--	--	--	--	--	--	--	--	--
pos_1463	Prenyl cis-caffeate	5.85958398674742e-05	8.10545539611924e-05	7.44335507349324e-05	6.62756480912903e-05	5.1769911548028e-05	7.05155332193995e-05	5.84480292511759e-05	6.61591936682468e-05	7.22984296677582e-05	7.18723924305748e-05	6.57101708610646e-05	6.69181100265044e-05	0.00780551439690491	0.966973680719692	0.0755624478450669	unchanged	--	--	--	--	--	--	--	--	--	--	--	--	--	--	--	--
pos_1464	Carbetocin	6.21371490972505e-06	5.59250355242077e-06	3.56283271844803e-06	4.81960336675853e-06	8.81003654408211e-06	3.56455484570823e-06	8.37116054566304e-06	6.33727530320368e-06	7.33154072938898e-06	3.69440358058765e-06	4.39168421865174e-06	3.95248606603502e-06	0.0687539188094384	0.827838147197478	0.219933625451908	unchanged	--	--	--	--	--	--	--	--	--	--	--	--	--	--	--	--
pos_1465	Karpoxanthin	0.000298060808034202	0.000308306461761247	0.000255507953473721	0.000343645639514947	0.000265572853307441	0.000294897199436826	0.000224279408882384	0.000245490462272402	0.000400266181295923	0.000286207950832796	0.000271319978024003	0.000250693841488546	-0.0931120020053218	0.625288838394732	0.593796977136379	unchanged	--	--	--	--	--	--	--	--	--	--	--	--	--	--	--	--
pos_1466	Kanzonol V	0.000138208544290893	0.000140077398936398	0.000142303178596263	0.000133108624239859	0.00013184946281891	0.000142199695094175	0.000104764816016356	0.000133511589799841	0.000153843530469054	0.000117575990789082	0.0001329006510864	0.000150897844226701	-0.0730593508261244	0.500936306503851	0.768310075254818	unchanged	--	--	--	--	--	--	--	--	--	--	--	--	--	--	--	--
pos_1467	Cholic acid glucuronide	4.28100064905182e-05	4.08901664113575e-05	4.04839096030536e-05	3.98647506577236e-05	5.18461174795863e-05	4.39497742271092e-05	4.45467876320196e-05	4.82523466275863e-05	3.0529355364323e-05	4.39450496795672e-05	3.72028512041229e-05	5.2833171980942e-05	-0.0305967421933655	0.91249102918535	0.0819338212821063	unchanged	--	--	LMST05010044	Cholic acid glucuronide	3alpha-[(beta-D-Glucopyranuronosyl)oxy]-7alpha,12alpha-dihydroxy-5beta-cholanoic acid	-	Sterol Lipids [ST]	Steroid conjugates [ST05]	Glucuronides [ST0501]	--	--	--	--	--	--	--
pos_1468	Neoherculin	9.60217590147377e-06	4.72139950253401e-06	4.28652942458864e-06	4.66904378281165e-06	5.47798543949841e-06	5.29220971118143e-06	5.38919147097482e-06	5.019325573828e-06	4.89166009573375e-06	5.27248117713613e-06	5.34026852259473e-06	5.17301695293223e-06	-0.0747903293395886	0.567819408898699	0.73905773052495	unchanged	--	--	--	--	--	--	--	--	--	--	--	--	--	--	--	--
pos_147	Dehydroabietic acid	0.000207236047757252	0.000257736506065935	0.000319044609836735	0.000232549643525521	0.000312166985305371	0.000286686212893575	0.000185098932974272	0.000236633200174777	0.000215253514544818	0.000371931292327055	0.000264588710186816	0.000353301359319051	-0.0189310734294139	0.959097399997513	0.0194296609346271	unchanged	--	--	LMPR0104050005	Dehydroabietic acid	-	-	Prenol Lipids [PR]	Isoprenoids [PR01]	C20 isoprenoids (diterpenes) [PR0104]	--	--	--	--	--	--	--
pos_1470	PE(20:5(5Z,8Z,11Z,14Z,17Z)/24:1(15Z))	1.6414578379195e-05	3.34050094705181e-06	2.61887049408084e-06	9.63116209112822e-07	2.13275026856456e-06	2.8342229877929e-06	3.98128342641029e-06	8.63017722765214e-07	1.8263074557716e-06	1.46412049644e-06	1.33541450169905e-06	2.08190489620223e-06	-0.838752279236651	0.294643165090153	1.19307966014879	unchanged	--	--	--	--	--	--	--	--	--	HMDB0009476	Organic compounds	Lipids and lipid-like molecules	Glycerophospholipids	Glycerophosphoethanolamines	53479838	_
pos_1471	Physagulin G	1.46438064256234e-05	1.08812060232341e-05	1.30996860034014e-06	1.00327875855826e-06	3.41974589289367e-06	3.09327903662634e-06	2.30368107020059e-06	9.37266104570808e-07	2.46102018806218e-06	1.4030555041018e-06	7.74752185056753e-07	1.73466085655507e-06	-1.29808424585809	0.135047754248287	1.57478819381056	unchanged	--	--	--	--	--	--	--	--	--	--	--	--	--	--	--	--
pos_1472	Isoglobotriaose	2.52500111470752e-05	3.64373211673396e-05	1.81940356122449e-05	0.000175892880880259	1.69813549502235e-06	2.88221253113965e-05	0.000101004005435755	2.31192071436725e-05	6.87577522896817e-06	4.80485647129006e-05	4.73212504705734e-05	2.05567347971367e-05	0.396771262839351	0.829536878245572	0.20883897832891	unchanged	--	--	--	--	--	--	--	--	--	--	--	--	--	--	--	--
pos_1474	(9Z,11E,13E,15Z)-4-Oxo-9,11,13,15-octadecatetraenoic acid	0.000212789327424455	0.000281871255343513	0.000161879732851776	0.000140547540676426	0.000188446318716434	0.000193700873417095	0.00016550239970144	0.00016340351707854	0.000144207198226718	0.000139649746321003	0.000155999443904217	0.00018071320645647	-0.282989446266575	0.116949448948209	1.45409000732297	unchanged	--	--	--	--	--	--	--	--	--	--	--	--	--	--	--	--
pos_1475	1-Hydroxy-1-phenyl-3-octadecanone	0.000105164732454102	9.80306290752893e-05	0.000121108135287998	0.000166621446886194	0.000125492732283598	0.000155859884786584	0.000183840474654909	0.000201857729324394	0.000151906027425918	0.000155001770446212	0.00015254499069377	0.000147274719374718	0.378387143246274	0.0295583513896161	2.06517231457104	up	--	--	--	--	--	--	--	--	--	--	--	--	--	--	--	--
pos_1477	Resolvin D5	0.000129005200832969	0.000136502854032981	0.000130971552188565	0.000119017208555818	0.000104093384664551	0.000117494670676946	0.00010933142111952	0.000121708833105914	0.000131408879998542	0.000115871571164218	0.000119016804781645	0.000116414011651266	-0.0430160568874278	0.509564766388664	0.702724060326613	unchanged	--	--	LMFA04030003	Resolvin D5	7S,17S-dihydroxy-4Z,8E,10Z,13Z,15E,19Z-docosahexaenoic acid	-	Fatty Acyls [FA]	Docosanoids [FA04]	Resolvin Ds [FA0403]	--	--	--	--	--	--	--
pos_1478	3-Hydroxy-cis-5-tetradecenoylcarnitine	0.000229329175893584	0.000225211596956495	0.000288900978630953	0.000307627497903921	0.00143351542348622	0.000460757151839451	0.000252330031182567	0.000240728003620664	0.000661342331225688	0.000258406988620117	0.000342820334086978	0.000227824073088706	-0.31713692523849	0.459665428397423	0.862089999179095	unchanged	--	--	--	--	--	--	--	--	--	--	--	--	--	--	--	--
pos_1479	Alanyl-Proline	3.92895756361606e-06	5.30745971183094e-06	9.42881751523334e-06	4.89706594009595e-06	4.18228290751799e-06	5.89383479177933e-06	5.15154685150624e-06	5.68996200318646e-06	5.01558432588958e-06	6.36799650426316e-06	8.55061376521766e-06	6.65166644389425e-06	0.19429433319312	0.534960721513037	0.650197331143868	unchanged	--	--	--	--	--	--	--	--	--	HMDB0028695	Organic compounds	Organic acids and derivatives	Carboxylic acids and derivatives	Amino acids, peptides, and analogues	83525	13485-59-1
pos_148	Manumycin A	5.90634475165761e-05	6.04671858198486e-05	8.05875774831514e-05	9.48257431033798e-05	4.99388968878232e-05	7.35679929783673e-05	7.71322523439102e-05	0.000112896183002214	3.75915513611593e-05	4.98064658287855e-05	7.90600502633391e-05	7.21872230579102e-05	-0.0179672513308393	0.89576723511382	0.145103765059604	unchanged	--	--	LMFA08020185	manumycin	(2E,4E,6R)-N-[(1S,5S,6R)-5-hydroxy-5-[(1E,3E,5E)-7-[(2-hydroxy-5-oxo-cyclopenten-1-yl)amino]-7-oxo-hepta-1,3,5-trienyl]-2-oxo-7-oxabicyclo[4.1.0]hept-3-en-3-yl]-2,4,6-trimethyl-deca-2,4-dienamide	Manumycin A; Ucfi-C; AC1O5PHE	Fatty Acyls [FA]	Fatty amides [FA08]	N-acyl amines [FA0802]	--	--	--	--	--	--	--
pos_1480	Mesterolone	1.39333330392685e-05	1.24164875430238e-05	1.25431662672957e-05	1.18332864083133e-05	1.38611699571701e-05	1.21679897725406e-05	1.14405555939765e-05	1.19097048775731e-05	1.09242611069736e-05	1.89601134794295e-05	1.1593548923851e-05	1.26539655704281e-05	-0.0108299769789362	0.927990189246398	0.0211364452778352	unchanged	--	--	LMST02020107	Mesterolone	-	-	Sterol Lipids [ST]	Steroids [ST02]	C19 steroids (androgens) and derivatives [ST0202]	--	--	--	--	--	--	--
pos_1481	delta-Methylionone	1.90243330382238e-05	2.27812108930566e-05	2.62212430282011e-05	2.7922854169156e-05	2.64565469560753e-05	2.28599633643146e-05	2.61152140212493e-05	2.30014130240343e-05	2.27791015332917e-05	2.42275709319252e-05	2.46108242613776e-05	2.74332684776845e-05	0.0369787423793895	0.759765849853807	0.351152501112976	unchanged	--	--	--	--	--	--	--	--	--	HMDB0032397	Organic compounds	Lipids and lipid-like molecules	Prenol lipids	Sesquiterpenoids	5463913	7784-98-7
pos_1482	Demissine	8.27796422103389e-06	1.90739985362411e-05	2.51577947865528e-05	7.65960812633728e-06	1.00782480373674e-05	1.14407813776991e-05	1.33900549424563e-05	2.39381111218229e-05	7.94592011567484e-06	5.27483766294921e-06	1.72218301650656e-05	3.92852870264968e-05	0.228908319477558	0.488823686823507	0.810051277094644	unchanged	--	--	--	--	--	--	--	--	--	--	--	--	--	--	--	--
pos_1483	trans-O-Methylgrandmarin	7.39775912285082e-06	6.9875062212539e-06	1.01852643574624e-05	1.06815058936513e-05	7.41080959072032e-06	9.23814304104522e-06	8.69172842030321e-06	9.67105837336489e-06	6.71805599406304e-06	5.76766521574105e-06	1.07342249392642e-05	1.4678905957615e-05	0.0691020144004142	0.63146093948368	0.540427736773784	unchanged	--	--	--	--	--	--	--	--	--	--	--	--	--	--	--	--
pos_1485	2-Isopropyl-1,4-benzenediol	0.000963368577336913	0.000718579684531306	0.000403209377426308	0.000611554762024493	0.000677079152647821	0.000586276832969409	0.000630690128378299	0.000512212741820121	0.000390623784798205	0.000932277091783391	0.00058931543270564	0.000341436836942071	-0.252880262747976	0.43104782749483	0.888974439851147	unchanged	--	--	--	--	--	--	--	--	--	--	--	--	--	--	--	--
pos_1487	2,3-Diaminosalicylic acid	8.78567505463626e-06	1.28739349931572e-05	9.96350243293132e-06	9.98862382779125e-06	8.19975153054298e-06	9.78438666035388e-06	8.46780995991721e-06	9.83025050377112e-06	1.02430647923677e-05	9.14031993224753e-06	9.40137899578068e-06	9.08912084597514e-06	-0.0732474035730526	0.447180878306513	0.670200886070659	unchanged	--	--	--	--	--	--	--	--	--	--	--	--	--	--	--	--
pos_1489	Docosanamide	0.00313916288651984	0.00398619985902129	0.00381742394952307	0.00403161052308723	0.00268540416122214	0.0034613337414954	0.00345418569943483	0.00370945203799495	0.00338335997333663	0.00332229943091989	0.00358739068883766	0.00331794793294372	-0.0104000455588409	0.8072652428312	0.171199501065873	unchanged	--	--	LMFA08010020	Docosanamide	docosanamide	-	Fatty Acyls [FA]	Fatty amides [FA08]	Primary amides [FA0801]	--	--	--	--	--	--	--
pos_149	cis-Resveratrol	5.37628225912502e-05	8.24045162090828e-05	5.19392129635753e-05	6.21763467805897e-05	4.96988331609571e-05	6.15458774188248e-05	5.80914236245346e-05	4.58661744649823e-05	5.50982688823776e-05	8.12520333572361e-05	5.86455517186285e-05	4.39440256785937e-05	-0.0849235161882245	0.680622723646007	0.321037140456964	unchanged	--	--	--	--	--	--	--	--	--	HMDB0041772	Organic compounds	Phenylpropanoids and polyketides	Stilbenes	_	25113755	_
pos_1490	Tetrahydropersin	5.52871745009169e-05	6.84348165333377e-05	8.703857841726e-05	8.04692875087803e-05	8.16375693645312e-05	7.42037706044718e-05	6.36482675971939e-05	6.26792758762834e-05	9.15535475530209e-05	8.1867674309806e-05	7.80022969858541e-05	6.79985649733955e-05	-0.00290899047923077	0.974032616032058	0.120112900481741	unchanged	--	--	LMFA05000700	Tetrahydropersin	2-hydroxy-4-oxohenicosyl acetate	-	Fatty Acyls [FA]	Fatty alcohols [FA05]	-	--	--	--	--	--	--	--
pos_1491	3b-Hydroxy-6b-(3-chloro-2-hydroxy-2-methylbutanoyloxy)-7(11)-eremophilen-12,8b-olide	1.0119897651374e-05	7.12851333616228e-06	7.66695340153774e-06	6.30255888434136e-06	9.14356625304842e-06	7.1535619553953e-06	7.78568538625378e-06	7.8774049889834e-06	6.80022234885965e-06	8.58216636711882e-06	5.98947364126779e-06	1.06342199621841e-05	-3.23432378337429e-05	0.977196957118667	0.0342622957983261	unchanged	--	--	--	--	--	--	--	--	--	--	--	--	--	--	--	--
pos_1492	TG(10:0/8:0/8:0)	2.19480116756749e-05	3.19755118720681e-05	2.98468075325199e-05	4.74733861018259e-05	2.20192127940175e-05	3.34950691699162e-05	2.23721390076129e-05	3.23684760144076e-05	3.29706136245377e-05	1.92240518197116e-05	3.94272120821879e-05	3.21839595528772e-05	-0.0554242594342877	0.786567127518429	0.286938513382371	unchanged	--	--	--	--	--	--	--	--	--	HMDB0072193	Organic compounds	Lipids and lipid-like molecules	Glycerolipids	Triradylcglycerols	73416182	_
pos_1493	TG(8:0/8:0/i-12:0)	5.75915108150401e-05	6.01099723321237e-05	6.12099790902772e-05	6.00545821926813e-05	5.23096092752831e-05	5.91662032177553e-05	6.286621172343e-05	6.6248303263982e-05	6.08126089556001e-05	5.42999132754483e-05	6.46750009206818e-05	5.13654670270111e-05	0.0356907673721967	0.57010409658598	0.636043309660662	unchanged	--	--	--	--	--	--	--	--	--	HMDB0071469	Organic compounds	Lipids and lipid-like molecules	Glycerolipids	Triradylcglycerols	131778274	_
pos_1495	2-methoxy-6-all trans-decaprenyl-2-methoxy-1,4-benzoquinol	2.7239912664624e-05	2.85846513104778e-05	1.96528127412068e-05	2.92731877559642e-05	2.09381533267035e-05	2.12336178709015e-05	8.08308470322769e-05	3.70136084881363e-05	3.9404555727847e-05	3.4881334148068e-05	3.97719851330087e-05	1.63648102538405e-05	0.624727669062898	0.109788817145698	1.79661459671814	unchanged	--	--	--	--	--	--	--	--	--	--	--	--	--	--	--	--
pos_1497	Isorhamnetin 3-O-[a-L-rhamnopyranosyl-(1->3)-a-L-rhamnopyranosyl-(1->6)-b-D-glucopyranoside]	6.19516993494602e-06	3.22785758487621e-06	5.22372575260606e-06	2.96358556286128e-06	7.93883681957811e-06	6.84888620712267e-06	5.29693059642305e-06	7.70211122500004e-06	4.66206034419028e-06	6.14939604735114e-06	4.84448827393792e-06	2.06314962365794e-05	0.466000518394043	0.329258679472704	1.05966842574286	unchanged	--	--	--	--	--	--	--	--	--	--	--	--	--	--	--	--
pos_1498	PC(DiMe(11,5)/MonoMe(11,3))	0.00154321226296999	0.000502798033225409	0.00048198643366335	0.000432273652509745	0.000691663290622983	0.00066024590127428	0.000746646572911972	0.000616933118365105	0.000585960900992651	0.000575049524256641	0.00061983064441119	0.000588275225379627	-0.0639098029064051	0.597916657001708	0.667590567302991	unchanged	--	--	--	--	--	--	--	--	--	HMDB0061404	Organic compounds	Lipids and lipid-like molecules	Glycerophospholipids	Glycerophosphocholines	_	_
pos_1499	Flavone	9.19683321576528e-05	0.000124099672107564	4.12478883768456e-05	0.000105732765702879	3.55194049989861e-05	7.24948791448637e-05	8.56049286429558e-05	7.07155151790364e-05	3.56432085555882e-05	0.000110535630088319	8.02109082118578e-05	4.73955682497099e-05	-0.0832306532704905	0.716000555285639	0.310335954974486	unchanged	--	--	LMPK12110097	Flavone	-	-	Polyketides [PK]	Flavonoids [PK12]	Flavones and Flavonols [PK1211]	--	--	--	--	--	--	--
pos_15	Guanine	0.000679697857844718	0.000858472194877804	0.000475416156282614	0.000490930418124927	0.000686524604643087	0.000433770694859097	0.00073354935723783	0.000685171865404108	0.000586239526709773	0.000777522421335236	0.000577880334397036	0.000755436383509417	0.217032838394953	0.314054203654215	1.10696855948277	unchanged	C00242	Purine metabolism(ko00230);;Metabolic pathways(ko01100)	--	--	--	--	--	--	--	--	--	--	--	--	--	--
pos_150	Lentiginosine	0.000192763131508112	0.000206350176913844	0.000128270966574903	0.000563023950820582	0.000204210143487219	0.000238873144141349	0.000593640186752635	0.000448896660910875	0.000149773700879272	0.000925177211819921	0.000554984502064514	0.000216486927404874	0.83076660013373	0.124413836160418	1.51265594167989	unchanged	--	--	--	--	--	--	--	--	--	--	--	--	--	--	--	--
pos_1500	Aesculin	0.00033124020237564	8.67547420488175e-05	9.48328940475704e-05	7.83341752839285e-05	0.000188776285416121	0.000190774859724975	0.000168997444165292	0.000150224454754005	0.000109718832698371	0.000129961853244618	0.000145030862158755	0.000136575790919278	-0.0167553196236376	0.61386965319157	0.613631388822377	unchanged	--	--	--	--	--	--	--	--	--	HMDB0030820	Organic compounds	Phenylpropanoids and polyketides	Coumarins and derivatives	Coumarin glycosides	5281417	531-75-9
pos_1501	(24E)-15alpha-Acetoxy-3alpha-hydroxy-23-oxo-7,9(11),24-lanostatrien-26-oic acid	0.00190605191067706	0.0013311021915979	0.00155192141578759	0.00199358203114592	0.00148418591938345	0.00222551463266763	0.00172463882022271	0.0015185373805459	0.00173508155807356	0.00160065530332431	0.00215840120028248	0.00143952452784144	-0.0330399641534118	0.770358564245033	0.318072010957538	unchanged	--	--	--	--	--	--	--	--	--	--	--	--	--	--	--	--
pos_1502	Ganglioside GA2 (d18:1/16:0)	0.000117592607182848	0.000155476740368967	0.000124430243566759	9.96551733646186e-05	7.99604501454314e-05	8.16356293165536e-05	0.00011260425675157	0.000141539632725705	0.000199457001047959	0.000139928231633722	0.000145031723297999	0.000144527328613111	0.442577304442521	0.046942050794908	1.86003895674376	up	--	--	--	--	--	--	--	--	--	--	--	--	--	--	--	--
pos_1503	PE(22:2(13Z,16Z)/22:6(4Z,7Z,10Z,13Z,16Z,19Z))	0.00160107828365188	0.000728358511860144	0.000707001611785195	0.000612906062581029	0.000782071701454471	0.000831871557622864	0.00087105767926529	0.000768402602682283	0.000755037212256931	0.000717713827677062	0.000782846463758418	0.000760173010304113	-0.101169588075727	0.526471816805257	0.767863648253128	unchanged	--	--	LMGP02011101	PE(22:2(13Z,16Z)/22:6(4Z,7Z,10Z,13Z,16Z,19Z))	1-(13Z,16Z-docosadienoyl)-2-(4Z,7Z,10Z,13Z,16Z,19Z-docosahexaenoyl)-glycero-3-phosphoethanolamine	PE(44:8); PE(22:2_22:6)	Glycerophospholipids [GP]	Glycerophosphoethanolamines [GP02]	Diacylglycerophosphoethanolamines [GP0201]	HMDB0009573	Organic compounds	Lipids and lipid-like molecules	Glycerophospholipids	Glycerophosphoethanolamines	52924802	_
pos_1504	Cadinene	7.38949305335764e-05	9.79403143741926e-05	9.49905850998644e-05	0.000102614174409837	7.45802823787135e-05	8.5723039180781e-05	8.42063054668049e-05	9.43247731020852e-05	7.87352046052687e-05	9.55154004910622e-05	8.36975832310842e-05	9.20258778391244e-05	0.00478910764505791	0.972049011793403	0.0225053906571764	unchanged	--	--	--	--	--	--	--	--	--	--	--	--	--	--	--	--
pos_1505	3alpha-Corosolic acid	0.000118177169509134	8.73884620356105e-05	9.40016214440017e-05	0.000151910913608394	0.000101940802446945	0.000109612154330245	0.00021184812853473	0.000511539106952053	9.99531879871171e-05	0.000141457727865477	0.000266890892485841	0.00076093931167674	1.2601688908088	0.0865875733814724	1.81942653299102	unchanged	--	--	--	--	--	--	--	--	--	--	--	--	--	--	--	--
pos_1506	OR-1855	0.000939847354119013	0.000544039790372981	0.000520244460306078	0.00045764104574574	0.000561602080917343	0.000582349583590377	0.000613898926810313	0.000575850963290809	0.000580825702693234	0.00052343245699527	0.00055736473345237	0.000558770061883352	-0.0417161290448913	0.664678886265618	0.540860719524335	unchanged	--	--	--	--	--	--	--	--	--	--	--	--	--	--	--	--
pos_1507	Ginsenoside Rh3	0.00155526959894682	0.0010007284200908	0.000911204910713631	0.000848539298201163	0.000998366486985496	0.00108399403860617	0.00105164158006616	0.000986421926605423	0.00104540165468193	0.000922293938309687	0.000992944075499502	0.000930611546941604	-0.0824671899746257	0.490051785395952	0.793441380327611	unchanged	--	--	--	--	--	--	--	--	--	--	--	--	--	--	--	--
pos_1508	Telithromycin	0.000498530076441526	0.000281718992300684	0.000186915051289055	0.000133571647444143	0.000219020988224835	0.000210746920444462	0.000192305612589844	0.000162819423240384	0.000195189995441558	0.000146445622492147	0.000172534761031269	0.000167892930077103	-0.440361367740971	0.179420914886378	1.47716942281189	unchanged	--	--	--	--	--	--	--	--	--	--	--	--	--	--	--	--
pos_1509	PE(22:5(4Z,7Z,10Z,13Z,16Z)/dm18:0)	5.1285710602548e-06	3.92383898305321e-06	0	1.24640828015713e-06	2.67611363850322e-06	3.55704313657996e-06	0	9.17865890860539e-07	9.50334006318637e-07	0	0	7.97310652938733e-07	-8.82684528745938	0.0281643594987611	2.16543271511476	down	--	--	--	--	--	--	--	--	--	--	--	--	--	--	--	--
pos_151	Moronic acid	0.000756804250428318	0.000737862019337232	0.00126800868245409	0.00104682494616254	0.000800600685462132	0.000947656160026501	0.00133962676675956	0.00117325082031878	0.000708624625387625	0.000946509555845842	0.00109488267053375	0.0009566437225474	0.162227453288098	0.387910374829503	0.945168745956499	unchanged	--	--	LMPR0106150002	Moronic acid	3-oxoolean-18-en-28-oic acid	-	Prenol Lipids [PR]	Isoprenoids [PR01]	C30 isoprenoids (triterpenes) [PR0106]	--	--	--	--	--	--	--
pos_1510	DG(20:5(5Z,8Z,11Z,14Z,17Z)/22:6(4Z,7Z,10Z,13Z,16Z,19Z)/0:0)	6.42549176166961e-05	0.000258766900997378	0.000143091571987829	3.48875474689253e-05	1.86164153880705e-05	9.80390082959116e-05	4.69481804699171e-05	6.50737532526035e-05	5.92339111182418e-05	8.35927026945196e-05	6.12873674816218e-05	9.58426618909603e-05	-0.128282525862701	0.391940015568197	0.730312787848289	unchanged	--	--	--	--	--	--	--	--	--	HMDB0007585	Organic compounds	Lipids and lipid-like molecules	Glycerolipids	Diradylglycerols	9543951	_
pos_1511	Cinchonain Id 7-glucoside	0.000452984621595739	9.049780146076e-05	0.000111109385859455	8.33759019852527e-05	0.000251093114183514	0.000246923347255092	0.000216610879937505	0.00019577081942602	0.000138500815259053	0.000150031126592963	0.00018147440501759	0.000161289454719068	0.0219100769871243	0.611848094707787	0.622931890064154	unchanged	--	--	--	--	--	--	--	--	--	--	--	--	--	--	--	--
pos_1512	Paxilline	0.00100036215617496	0.000389735106748937	0.000345306973184229	0.000313856584173827	0.000695383932958468	0.000698937648886703	0.000752736648895307	0.000524128928858591	0.00053085630726788	0.000511000207707165	0.000556353548557317	0.000542118733327973	0.108736709189838	0.971100592745046	0.0412077589986993	unchanged	--	--	--	--	--	--	--	--	--	--	--	--	--	--	--	--
pos_1513	L-Thyronine	8.72882580079925e-05	9.33453320689016e-05	3.0602974589997e-05	7.58821820421707e-05	4.89686036088167e-05	6.21549218728722e-05	5.01233684313944e-05	3.90934469985783e-05	2.04472037642368e-05	8.40518385153635e-05	4.93028639168345e-05	2.64299662797725e-05	-0.619014179957823	0.141048822842442	1.4465167301271	unchanged	--	--	--	--	--	--	--	--	--	--	--	--	--	--	--	--
pos_1515	Ubiquinone-2	3.3505787445601e-05	3.42558654384758e-05	1.96189722936115e-05	2.03076257564728e-05	2.05125415776946e-05	2.51346218925268e-05	2.09257406550205e-05	2.32326417302956e-05	3.24863454422449e-05	2.21115084508951e-05	2.6982864646933e-05	3.37852475498052e-05	0.0722141847452011	0.777375542777502	0.352424828139124	unchanged	--	--	--	--	--	--	--	--	--	--	--	--	--	--	--	--
pos_1517	Dethiobiotin	1.43573833160033e-05	1.41966680311024e-05	1.1009524057577e-05	1.09542792590636e-05	1.24007991957222e-05	1.22123700813334e-05	1.22348578331371e-05	1.09453141585854e-05	1.12793509666618e-05	1.23548163401998e-05	1.08193554738623e-05	1.17028687112189e-05	-0.109303848119474	0.188822017919555	1.27106738902292	unchanged	C01909	Metabolic pathways(ko01100);;Biotin metabolism(ko00780)	--	--	--	--	--	--	--	HMDB0003581	Organic compounds	Lipids and lipid-like molecules	Fatty Acyls	Fatty acids and conjugates	445027	533-48-2
pos_1518	L-phenylalanyl-L-proline	1.79545154711262e-05	2.05983539136477e-05	2.11712509555619e-05	2.32530515150676e-05	2.02694449756663e-05	2.02506065358722e-05	2.23557233997376e-05	2.10440514564414e-05	2.06442634975489e-05	1.92052523023621e-05	1.87473572378072e-05	1.79084418817951e-05	-0.0425080681444161	0.550871736105385	0.544035089548983	unchanged	--	--	--	--	--	--	--	--	--	HMDB0011177	Organic compounds	Organic acids and derivatives	Carboxylic acids and derivatives	Amino acids, peptides, and analogues	7020641	7669-65-0
pos_152	Biliverdin IX	0.000302935150633915	0.000354951659676516	0.000237877699987874	0.000276243528592757	0.000370415801642368	0.000327236369101438	0.000296712847219435	0.000265650767694174	0.000255703986782533	0.00032569825387281	0.000269735498348561	0.000275135280819351	-0.13566258761699	0.225130567990737	1.14024786696013	unchanged	C00500	Porphyrin and chlorophyll metabolism(ko00860);;Metabolic pathways(ko01100)	--	--	--	--	--	--	--	HMDB0001008	Organic compounds	Organoheterocyclic compounds	Tetrapyrroles and derivatives	Bilirubins	5353439	114-25-0
pos_1521	Matesaponin 3	0.000739775453151963	0.000508532880000026	0.000552669162302267	0.00044999139792144	0.000822901104095299	0.00060165492178201	0.000748135988216084	0.000638828051138164	0.000480559470717719	0.000691087389721162	0.000429389103433364	0.000719619712491353	0.0137390439277816	0.947588562484172	0.0706527250204944	unchanged	--	--	--	--	--	--	--	--	--	HMDB0040964	Organic compounds	Lipids and lipid-like molecules	Prenol lipids	Terpene glycosides	73157196	164178-28-3
pos_1522	DG(14:0/16:1(9Z)/0:0)	1.77858626200862e-05	4.53097073081658e-07	1.40907827373731e-06	1.23231484394912e-06	8.06467078286858e-06	6.30287054124413e-06	3.48880159467498e-06	2.26998001313084e-06	1.90586330109934e-06	2.44601158664826e-06	5.45788684047187e-06	2.12460372611107e-06	-0.122079191057026	0.33241954877836	1.16119635966718	unchanged	--	--	--	--	--	--	--	--	--	HMDB0007012	Organic compounds	Lipids and lipid-like molecules	Glycerolipids	Diradylglycerols	53477950	_
pos_1523	3-Hydroxyhexadecanoylcarnitine	9.85984422473146e-05	4.20973635087766e-05	2.51247022282717e-05	2.14074501152174e-05	4.2851998915324e-06	3.87081265495862e-05	1.98120512525695e-05	8.02993743649772e-06	4.08518285705479e-05	0.000192176802880356	4.43451116017082e-05	1.76293984375643e-07	-0.874180181737243	0.707210926447427	0.299322997657796	unchanged	--	--	--	--	--	--	--	--	--	HMDB0013336	Organic compounds	Lipids and lipid-like molecules	Fatty Acyls	Fatty acid esters	126456228	195207-76-2
pos_1524	Piperoic acid	3.08321877691417e-05	2.73504167772727e-05	4.32974316242995e-05	4.57448797987397e-05	1.7467361949402e-05	2.98656340679874e-05	3.74131948632115e-05	2.88066289829039e-05	7.15485054335662e-05	3.75222609887933e-05	3.80717718473687e-05	2.30410664437645e-05	0.257084287079696	0.414142428456952	0.782591909659938	unchanged	--	--	--	--	--	--	--	--	--	--	--	--	--	--	--	--
pos_1525	Propylene glycol alginate	9.04275346891121e-06	9.76067837167067e-06	6.6960510921941e-06	5.53026156787633e-06	1.01190940769255e-05	6.47366813049021e-06	1.33780050411634e-05	1.03411199497976e-05	7.7777650873554e-06	1.05333546232825e-05	7.8388282003383e-06	1.5000174217554e-05	0.439652044276585	0.0762222183604828	1.84912314680588	unchanged	--	--	--	--	--	--	--	--	--	HMDB0039860	Organic compounds	Organic oxygen compounds	Organooxygen compounds	Carbohydrates and carbohydrate conjugates	131752735	_
pos_1526	Polyporusterone B	0.00318087224331394	0.00143405500368446	0.00132416431835951	0.00119438592007317	0.00209202872790322	0.002084593486621	0.00225717812468318	0.00178852783212265	0.00167254559005677	0.00162155728494933	0.00175517548819204	0.00178998331672538	0.021456174064765	0.830642934147307	0.253930551788995	unchanged	--	--	--	--	--	--	--	--	--	--	--	--	--	--	--	--
pos_1527	Pregabalin	0.00048348993384729	0.000593097460802505	0.00122712310114696	0.000790306756348946	0.000418652037190582	0.000698672639808911	0.00067302857144053	0.000882091723524844	0.000632016229680207	0.00087342472016851	0.000865649591469124	0.00124315097052743	0.352701666626883	0.308282192751704	1.03972479427874	unchanged	--	--	--	--	--	--	--	--	--	--	--	--	--	--	--	--
pos_153	Ursolic acid	0.00577117801889694	0.00552012078055313	0.00496568403988439	0.00523332699076843	0.00403743807541336	0.00494695449536953	0.00594726241609609	0.00515955368850496	0.0047016175546309	0.00606020759701801	0.00508354603304198	0.00460152689799435	0.0511128295603136	0.62027636024982	0.571864205106318	unchanged	--	--	LMPR0106180007	ursolic acid	3beta-hydroxyurs-12-en-28-oic acid	(3beta)-3-hydroxyurs-12-en-28-oic acid; Ursolic acid; malol; prunol; urson	Prenol Lipids [PR]	Isoprenoids [PR01]	C30 isoprenoids (triterpenes) [PR0106]	HMDB0002395	Organic compounds	Lipids and lipid-like molecules	Prenol lipids	Triterpenoids	64945	77-52-1
pos_1532	Preisocalamendiol	8.97341725473336e-06	7.46558908978184e-06	2.14095318087241e-05	4.55114316418157e-06	5.19785136868026e-06	8.75887542032555e-06	4.30929199250938e-06	9.4993215330757e-06	4.95553931704611e-06	1.46768658007626e-05	1.09114343685865e-05	1.765315185793e-05	0.15807120409335	0.781920767155959	0.2360694806171	unchanged	--	--	--	--	--	--	--	--	--	--	--	--	--	--	--	--
pos_1533	iso-A2E(11-cis)	0.00048262597899549	0.000339142988314339	0.000365537662556899	0.000276775834023216	0.000209684071745277	0.0002853378994442	0.0002287505065789	0.000291480058073916	0.000255296709285971	0.0003118878298957	0.00028909076973166	0.000320231468753871	-0.168568997629666	0.322732431060384	1.1475014174452	unchanged	--	--	--	--	--	--	--	--	--	--	--	--	--	--	--	--
pos_1534	2-Methyl-3-(2-pentenyl)-2-cyclopenten-1-one	3.63811072416151e-05	3.77794381751597e-05	3.25636457174487e-05	3.8198469205698e-05	3.45079780121485e-05	3.62583770274909e-05	3.83516385775183e-05	3.8820388195475e-05	3.851614028093e-05	4.01323976587732e-05	3.85132611496119e-05	3.64893783176681e-05	0.0993921784347087	0.0341616947442768	2.06258561770893	up	--	--	--	--	--	--	--	--	--	--	--	--	--	--	--	--
pos_1536	Dihydroergotamine	0.000112971069146283	0.000117583351568936	0.000116487037867756	0.000129980674789884	0.00013960918073186	0.000142074178189556	0.00018209420710565	0.00014285371145522	0.000100615914113628	0.000162627956006422	0.000147162877023359	0.000125881617511946	0.16383280374175	0.219723079230406	1.38944210413608	unchanged	--	--	--	--	--	--	--	--	--	--	--	--	--	--	--	--
pos_1537	Lycopersiconol	6.69914892044677e-05	6.36161497048928e-05	4.61037335326694e-05	6.25144763898645e-05	5.94923088277146e-05	5.99459165709283e-05	9.76846956783469e-05	7.56896442150788e-05	5.63250255097165e-05	6.3926018000137e-05	7.58366433480132e-05	4.09304236478106e-05	0.152611174876949	0.345425494300232	1.07802733692533	unchanged	--	--	--	--	--	--	--	--	--	--	--	--	--	--	--	--
pos_1539	alpha-Fluoro-beta-ureidopropionic acid	1.13734088023686e-05	1.65022855804753e-05	1.38774773303446e-05	1.22681468944696e-05	1.21602707986316e-05	1.25120490543796e-05	1.16175131893683e-05	1.18434282500991e-05	1.36287740545991e-05	1.08659197155866e-05	1.1960528153888e-05	1.17847489963322e-05	-0.126571739565179	0.206764686699243	1.15089003456542	unchanged	C16631	Drug metabolism - other enzymes(ko00983)	--	--	--	--	--	--	--	--	--	--	--	--	--	--
pos_154	Necatorine	1.53299186434102e-05	3.07982392185398e-05	1.13864895241435e-05	5.00329796138122e-05	5.02041982577127e-05	2.89333784342312e-05	1.51556947143601e-05	1.75889247308192e-05	5.25771772526077e-05	2.96697786624641e-05	2.97709003508549e-05	2.85787428666506e-05	-0.0238566136792215	0.802537817813641	0.334777376883213	unchanged	--	--	--	--	--	--	--	--	--	HMDB0031330	Organic compounds	Organohalogen compounds	Alkyl halides	Halomethanes	5943	56-23-5
pos_1541	Tryptophanol	8.03977744000692e-05	0.000233285017239768	9.55104707771093e-05	7.36695479603395e-05	0.000171006875732191	0.000119498338724636	0.000102068345515496	9.38328176911695e-05	7.36429791710171e-05	0.000169609945148665	0.000102362622481194	8.94312854291287e-05	-0.216692653889499	0.434157849954687	0.686476487462047	unchanged	C00955	Tryptophan metabolism(ko00380)	--	--	--	--	--	--	--	HMDB0003447	Organic compounds	Organoheterocyclic compounds	Indoles and derivatives	Indoles	10685	526-55-6
pos_1542	Tetracosapentaenoic acid (24:5n-3)	0.00155769508502495	0.00156978557554441	0.00226479464203812	0.00268382134059426	0.00321104065553672	0.00244517994331522	0.00195422953728463	0.00258598380515572	0.0029129294238698	0.00237871008952655	0.00258435916069421	0.00272957224881751	0.180302337358427	0.450814125276095	0.66870768926554	unchanged	--	--	--	--	--	--	--	--	--	--	--	--	--	--	--	--
pos_1543	Monomenthyl succinate	0.000645905639795778	0.000512852989242155	0.00043279437335921	0.000463764579150755	0.000448383109395422	0.000493716087517378	0.000456705325816567	0.000475047516547374	0.000632503168250189	0.000362701897901769	0.000493114956877432	0.000472693004670614	-0.0572227915764785	0.721380209627027	0.416512706567589	unchanged	--	--	--	--	--	--	--	--	--	HMDB0036143	Organic compounds	Lipids and lipid-like molecules	Prenol lipids	Monoterpenoids	10199004	188709-97-9
pos_1544	4R,5R,6S-Trihydroxy-2-hydroxymethyl-2-cyclohexen-1-one 6-(2-hydroxy-6-methylbenzoate)	9.9706469529894e-05	0.000157503145683247	9.76932032700066e-05	0.000173740420831154	0.00011680264824741	0.000134432222345831	0.000112473275592376	0.000116338775851633	0.000261054580911855	0.000108449144687068	0.000189154125465807	0.000173043998088926	0.255771733873615	0.30945055351084	1.06669181866747	unchanged	--	--	--	--	--	--	--	--	--	--	--	--	--	--	--	--
pos_1545	2-(Arabinosylamino)-3-(glucosylamino)propanenitrile	8.19418553666161e-06	1.02227646751622e-05	1.80430203678585e-05	9.10981777012089e-06	7.14304363414474e-06	9.13587373055323e-06	3.89148320799565e-06	1.20158869516469e-05	6.57955046599233e-06	2.26131332784054e-05	1.0006511196837e-05	1.89306803429876e-05	0.0921006722864774	0.561362483096476	0.530818539066447	unchanged	--	--	--	--	--	--	--	--	--	--	--	--	--	--	--	--
pos_1546	2'-Oxoaloesol 7-glucoside	7.91942607584604e-06	5.26074150433464e-06	2.93358432022411e-06	9.57611083174629e-07	3.87515457683865e-06	4.54710221193541e-06	5.38230429134271e-07	5.37294853708217e-06	2.25451138498614e-05	2.09789890090295e-07	9.51978769078453e-06	1.424930432088e-05	-0.0254201233991438	0.2670184547615	1.13589463279547	unchanged	--	--	--	--	--	--	--	--	--	--	--	--	--	--	--	--
pos_1547	Gravacridonolchlorine	7.51153619623032e-07	7.85243725189995e-06	8.6112947525965e-07	1.51726024243088e-06	5.835638015303e-06	3.08582658123483e-06	2.91848659052754e-06	2.28194215380504e-06	7.73887217390713e-06	2.18051813639932e-07	2.6907528660658e-06	6.53723192514468e-07	-0.468587975775325	0.733736425008526	0.23510537551087	unchanged	--	--	--	--	--	--	--	--	--	--	--	--	--	--	--	--
pos_1548	Tertatolol	6.34245424339913e-06	7.59131330330145e-06	5.93302887202048e-06	8.39518789700579e-06	1.41749938591243e-05	1.02325612456489e-05	1.09153552799492e-05	5.57577327042314e-06	8.75806339426587e-06	1.47338926367159e-05	9.91479263874482e-06	7.28223359620694e-06	0.117501267005007	0.685128806680749	0.440707675501245	unchanged	--	--	--	--	--	--	--	--	--	--	--	--	--	--	--	--
pos_1549	4-Methyl-2-pentyl-1,3-dioxolane	0.000367409891145014	0.000367570032899753	0.000527167251586901	0.000615208377537651	0.000492369989726271	0.000605351347258427	0.0006787652795462	0.000754160362633074	0.00063395215042419	0.000634031674178458	0.000575665738729368	0.000521891276911758	0.373905420841716	0.035087027432012	2.00590066389473	up	--	--	--	--	--	--	--	--	--	--	--	--	--	--	--	--
pos_155	Alpha-Calacorene	0.00012213912036194	0.000196715811787959	0.000238628403180554	0.000173217714633264	0.00011733676585209	0.000168264943496405	0.000205546423920098	0.00022266117923702	0.000214530516039301	0.000171396089046219	0.000222927567100571	0.000261807355813688	0.387421957938452	0.0646980706173978	1.90716522197282	unchanged	--	--	--	--	--	--	--	--	--	HMDB0036453	Organic compounds	Lipids and lipid-like molecules	Prenol lipids	Sesquiterpenoids	528708	21391-99-1
pos_1550	(S)-3-Octanol glucoside	2.79539595785827e-05	4.56161908281232e-05	3.24912946030436e-05	3.2906212295816e-05	3.77281558744027e-05	3.40009802319984e-05	3.38479870213846e-05	3.85907975583936e-05	3.36141330341347e-05	3.10892026501341e-05	3.35292143067039e-05	4.51459649326354e-05	0.0400990708026203	0.796895387224169	0.448458649821641	unchanged	--	--	--	--	--	--	--	--	--	--	--	--	--	--	--	--
pos_1551	cis-3-Hexenyl b-primeveroside	1.43222536176739e-05	9.9166692305305e-06	9.80907695063077e-06	1.0711699056726e-05	1.11747147044582e-05	1.1674018197449e-05	9.96073331806735e-06	1.13530521154881e-05	1.19255985736145e-05	8.4978345703292e-06	9.52819090663082e-06	1.40705334444275e-05	-0.056919624601683	0.728143941864637	0.413020313578261	unchanged	--	--	--	--	--	--	--	--	--	--	--	--	--	--	--	--
pos_1552	5-b-Cholestane-3a ,7a ,12a-triol	7.88115603720309e-05	7.43497074135176e-05	7.76720233602588e-05	9.4451614577203e-05	0.000184621729597308	9.83062415813327e-05	6.54121329968684e-05	7.20416417522624e-05	0.000123509799300051	8.67427205998138e-05	8.40607794902039e-05	7.26088235135738e-05	-0.223370831259036	0.394290114867114	1.00429168191936	unchanged	--	--	--	--	--	--	--	--	--	--	--	--	--	--	--	--
pos_1553	3-Methylcyclopentene	1.52042240466445e-05	2.1385675154906e-05	2.00121392070273e-05	1.5655738892449e-05	1.38880521974006e-05	1.71291579595866e-05	1.4145306226956e-05	1.65058002234726e-05	1.79384487764261e-05	1.61349408424922e-05	1.68630124610177e-05	1.51160673238928e-05	-0.0820828980444137	0.431599177319926	0.734989649044811	unchanged	--	--	--	--	--	--	--	--	--	--	--	--	--	--	--	--
pos_1554	2-Hydroxylauroylcarnitine	5.37432482965262e-05	3.91269092606239e-05	8.93817441365659e-05	5.08065590441961e-05	3.31518934462394e-05	5.9142154771679e-05	2.68664167226302e-05	3.19356723328974e-05	4.10659339223321e-05	7.30159072184593e-05	4.77409933942625e-05	4.36625081931601e-05	-0.300628077019535	0.351944235490871	1.05646517615023	unchanged	--	--	LMFA07070032	2-Hydroxylauroylcarnitine	3-[(2-hydroxydodecanoyl)oxy]-4-(trimethylazaniumyl)butanoate	-	Fatty Acyls [FA]	Fatty esters [FA07]	Fatty acyl carnitines [FA0707]	--	--	--	--	--	--	--
pos_1556	4b-Hydroxystanozolol	5.68570358288097e-05	7.55204542455022e-05	0.000112858389423605	9.10867910581932e-05	6.13776549197161e-05	8.13009142468758e-05	5.96237272303631e-05	9.37503697112992e-05	6.36823545681576e-05	6.63898068995419e-05	8.1408704376118e-05	0.00012709794059251	0.0251238561158402	0.875051490464008	0.179199891544691	unchanged	--	--	--	--	--	--	--	--	--	--	--	--	--	--	--	--
pos_1557	Mesuagin	5.77662575100288e-06	2.7171963813625e-06	8.41618070734015e-06	7.10055688580617e-06	3.67692261918262e-06	4.84818962866377e-06	4.56834538368613e-06	5.20486591640956e-06	2.47426723899179e-06	8.25140318782153e-06	5.29026733233419e-06	8.2192762083177e-06	0.0560228076088762	0.849328649363549	0.0779441840754244	unchanged	--	--	LMPK12100030	Mesuagin	5-Hydroxy-6'',6''-dimethyl-6-isobutyryl-4-phenylpyrano[2'',3'':7,8]coumarin	-	Polyketides [PK]	Flavonoids [PK12]	Neoflavonoids [PK1210]	--	--	--	--	--	--	--
pos_1559	L-Citronellol glucoside	4.52291617573153e-05	6.69199366195705e-05	5.40081663170335e-05	3.83072052948338e-05	5.12880378651323e-05	5.11608518280147e-05	3.41055032826785e-05	4.36686740832197e-05	3.20186743573651e-05	9.17649619942896e-05	5.2064871285958e-05	6.52605445629934e-05	-0.0240272931983689	0.847628575306805	0.210770949988696	unchanged	--	--	--	--	--	--	--	--	--	--	--	--	--	--	--	--
pos_156	N,N-Dimethylethanolamine N-oxide	7.12811894446391e-06	8.30617995789254e-06	9.67793316730731e-06	9.17053605149765e-06	6.94861968769878e-06	8.4298782372866e-06	9.53107194706139e-06	9.35614246585868e-06	8.36229886337797e-06	7.84225425650422e-06	8.42453412359562e-06	9.52015685965688e-06	0.101275464607088	0.318304479199981	1.15956597450757	unchanged	--	--	--	--	--	--	--	--	--	--	--	--	--	--	--	--
pos_1561	Eremopetasitenin B2	7.7823317372028e-06	1.0755756451776e-05	3.54341407333062e-06	6.81824519820132e-06	6.52400713151173e-06	5.16045248976173e-06	1.82376774281502e-06	1.55746163172678e-06	9.70414945874733e-06	5.39407816811216e-06	9.85455417069282e-07	3.29946266136884e-06	-1.18964093508969	0.109728086157515	1.5887332274275	unchanged	--	--	--	--	--	--	--	--	--	--	--	--	--	--	--	--
pos_1562	Prostaglandin F1a	5.52998123354008e-05	8.35900999331551e-05	7.71076759658416e-05	6.75917085917391e-05	5.85715455418072e-05	6.83089129006078e-05	5.41909956212396e-05	6.72299392954742e-05	7.89204526801208e-05	5.59996097694856e-05	6.60484728679815e-05	6.64758600494145e-05	-0.074545414683497	0.542279094492471	0.547222601695208	unchanged	--	--	--	--	--	--	--	--	--	--	--	--	--	--	--	--
pos_1563	Glycinoeclepin B	5.3489717754977e-05	5.52650476417317e-05	5.771873224126e-05	5.36763096923107e-05	5.74857116417559e-05	5.87550400700865e-05	4.74861500994766e-05	5.57289557682116e-05	5.99235677002829e-05	5.2478078783406e-05	5.3276188799121e-05	6.33314493040139e-05	-0.0232807893207987	0.787928309487046	0.299867779932282	unchanged	--	--	--	--	--	--	--	--	--	--	--	--	--	--	--	--
pos_1565	DG(18:1(11Z)/22:4(7Z,10Z,13Z,16Z)/0:0)	1.37123127564489e-05	0.000157504185702642	2.15023568621184e-05	7.21058971178399e-06	3.24780659329387e-06	4.26662476184286e-05	3.32256172629368e-06	3.0226002917432e-06	3.24518959225514e-06	4.27168385839935e-06	4.63718660053309e-06	6.24164561155585e-06	-2.24855091523484	0.185170020919771	1.20737005164479	unchanged	--	--	--	--	--	--	--	--	--	HMDB0007205	Organic compounds	Lipids and lipid-like molecules	Glycerolipids	Diradylglycerols	53478080	_
pos_1566	(-)-alpha-Narcotine	2.8756706294032e-06	1.84229950731844e-06	4.93041664779372e-05	8.9780414563924e-05	6.45383773243398e-06	2.11375178548606e-05	7.71785811276086e-06	8.60559149714214e-05	1.65479972261727e-06	2.97375862164694e-06	3.59207419486262e-05	0.000182906415833266	0.457798384207834	0.477083412404992	0.726398235259714	unchanged	--	--	--	--	--	--	--	--	--	HMDB0033439	Organic compounds	Alkaloids and derivatives	Phthalide isoquinolines	_	275196	128-62-1
pos_1567	Neoacrimarine F	0.000119561412929794	3.06131066431554e-05	3.51729142747158e-05	2.75569473936721e-05	7.12329626012113e-05	7.12030114746806e-05	6.47135606237066e-05	5.62945285307876e-05	4.58868265638038e-05	4.81228954097824e-05	5.64323372307722e-05	4.89684707958534e-05	0.050841313359447	0.709327859913176	0.471680156832148	unchanged	--	--	--	--	--	--	--	--	--	--	--	--	--	--	--	--
pos_1568	Cabergoline	2.25109964855567e-05	1.24670446242854e-05	6.34210779782219e-05	2.36354871519745e-05	3.49026475413875e-05	0.000207081889978568	4.95448376511682e-05	5.22044684628868e-05	7.83767194189476e-05	0.000121003083800439	4.72761191163586e-05	3.26091882930914e-05	0.606093815153221	0.933723359013669	0.212823277924445	unchanged	--	--	--	--	--	--	--	--	--	--	--	--	--	--	--	--
pos_1569	Propoxyphene	0.00560832226043319	0.00252651953479776	0.00228334756684678	0.00214102112447971	0.00372575356999332	0.00384294794364622	0.00411461275312139	0.00311287874382986	0.00306148188778012	0.00307684419515744	0.00313868081558733	0.00317269246559547	0.0461063001374633	0.89876312603569	0.150494564113527	unchanged	C07481	Caffeine metabolism(ko00232);;Metabolic pathways(ko01100)	--	--	--	--	--	--	--	HMDB0001847	Organic compounds	Organoheterocyclic compounds	Imidazopyrimidines	Purines and purine derivatives	2519	58-08-2
pos_157	3,6,9,12,15-octadecapentaenoic acid	0.000186807393645338	0.000184851268244152	0.000339755768511375	0.000321710656587187	0.000398160022244346	0.00030987087132725	0.000269992956811034	0.000255140015417993	0.000350008319381872	0.000289760727843082	0.000296385993775979	0.000299799945642085	0.0691243090096592	0.932418610153224	0.00505169114937692	unchanged	--	--	LMFA01030359	3,6,9,12,15-octadecapentaenoic acid	3,6,9,12,15-octadecapentaenoic acid	C18:5n-3,6,9,12,15	Fatty Acyls [FA]	Fatty Acids and Conjugates [FA01]	Unsaturated fatty acids [FA0103]	--	--	--	--	--	--	--
pos_1570	Panaxynol	0.000100114132013049	0.000160765651276873	8.471475325333e-05	8.5413747403304e-05	0.00011939130639797	0.000106759916475803	0.000112806718278201	8.95784411701687e-05	0.000127079880750226	0.000119447558377082	0.000103485265467269	7.52315142826712e-05	-0.0523123639031375	0.733809217062145	0.215613147928675	unchanged	--	--	LMFA05000689	Falcarinol	1,9Z-heptadecadien-4,6-diyn-3R-ol	Panaxynol; CHEBI:66722; (3R,9Z)-heptadeca-1,9-dien-4,6-diyn-3-ol; 1,9-Heptadecadiene-4,6-diyn-3-ol	Fatty Acyls [FA]	Fatty alcohols [FA05]	-	HMDB0039588	Organic compounds	Lipids and lipid-like molecules	Fatty Acyls	Fatty alcohols	5353620	81203-57-8
pos_1572	(R)-Laudanidine	0.000420899549046064	0.000224995017531134	2.11460843023292e-05	0.000125715761802576	0.000286487559230178	0.000210856228464749	2.27918021040984e-05	2.17310713916936e-05	2.08085554706771e-05	0.000119117176752181	4.83642476357147e-05	2.56210229887475e-05	-2.21454466379704	0.026058649507241	2.27801251368211	down	--	--	--	--	--	--	--	--	--	--	--	--	--	--	--	--
pos_1573	Nicotinuric acid	7.39900254137842e-06	9.00038084332621e-06	6.40463882975908e-06	8.97271510644905e-06	9.1462677708159e-06	7.9687854834553e-06	9.4307195191991e-06	7.78261505232425e-06	7.76847053599923e-06	7.6425795734828e-06	7.43362012332862e-06	8.99414768810566e-06	0.0104738262458639	0.963000477135485	0.222479126853313	unchanged	C05380	Nicotinate and nicotinamide metabolism(ko00760)	--	--	--	--	--	--	--	HMDB0003269	Organic compounds	Organic acids and derivatives	Carboxylic acids and derivatives	Amino acids, peptides, and analogues	68499	583-08-4
pos_1574	MG(0:0/20:3(11Z,14Z,17Z)/0:0)	0.000275395978068345	0.000343749818629357	0.000347686981165068	0.000303482359268216	0.000249104034203198	0.000302505190312165	0.000268626748749635	0.000298911996494173	0.000341659833842891	0.000298256532538179	0.000281607312148153	0.0002828025909721	-0.0346763567164832	0.66723753918185	0.396215951666317	unchanged	--	--	--	--	--	--	--	--	--	--	--	--	--	--	--	--
pos_1575	5,6-Dihydro-5,6-dihydroxy-y,y-carotene	3.26295050276937e-07	0	4.77564251325971e-07	2.51858530274683e-05	3.44416419811438e-07	2.50355607685478e-06	2.06710705068851e-07	2.20542925337834e-06	0	0	0	8.12528849821173e-06	-7.40122143478045	0.504672145311178	0.774081755824209	unchanged	--	--	--	--	--	--	--	--	--	--	--	--	--	--	--	--
pos_1576	Bn-NCC-1	3.32769288423287e-06	1.95997406956248e-05	7.68887407320849e-06	2.33707958397171e-05	8.25963900193273e-06	1.49599258827055e-05	2.12437561577371e-05	1.43893468558585e-05	1.60306318505991e-05	1.11323847032808e-05	1.41438878615305e-05	1.31674943857454e-06	-0.0852280182513638	0.967297569181777	0.188994196956842	unchanged	--	--	--	--	--	--	--	--	--	--	--	--	--	--	--	--
pos_1577	Octadecyl fumarate	4.50761190582334e-05	5.3946012978328e-05	4.35945702685142e-05	4.54123496107853e-05	4.88751283236021e-05	4.73416620956311e-05	6.02851497753293e-05	5.47440409860796e-05	4.84007096586657e-05	4.49608579174202e-05	4.88395299688381e-05	4.23926429967971e-05	0.0694569927472024	0.429557528975245	1.01763249315429	unchanged	--	--	LMFA07010979	Octadecyl fumarate	(2Z)-4-(octadecyloxy)-4-oxobut-2-enoic acid	-	Fatty Acyls [FA]	Fatty esters [FA07]	Wax monoesters [FA0701]	--	--	--	--	--	--	--
pos_1578	Paramethasone	6.61891043759364e-06	1.24377696659462e-05	1.29877700828047e-05	7.56582027671859e-06	8.31626859677461e-06	8.28111940882954e-06	6.22710686963737e-06	8.90402077392389e-06	1.2415752769592e-05	6.34103807306437e-06	7.67469774468486e-06	8.21658694413479e-06	-0.169517185269136	0.471780103063108	0.703496741153035	unchanged	--	--	--	--	--	--	--	--	--	--	--	--	--	--	--	--
pos_1579	Ginsenoside Rh1	0.000256889827136537	9.59515759885036e-05	8.76836238098489e-05	9.28368006301119e-05	0.000120384592442054	0.000118150719877655	0.0001386323030964	0.000108918745479981	0.000102712869092841	0.000101762105892822	0.000109342559699374	0.000104498184678378	-0.110381555739485	0.537078734527993	0.751282012618453	unchanged	--	--	LMPR0106080017	Ginsenoside Rh1	3beta,12beta,20-trihydroxydammar-24-en-6alpha-yl-beta-D-glucopyranoside	20(S)-Ginsenoside Rh1; Prosapogenin A2; Sanchinoside Rh1	Prenol Lipids [PR]	Isoprenoids [PR01]	C30 isoprenoids (triterpenes) [PR0106]	HMDB0039554	Organic compounds	Lipids and lipid-like molecules	Prenol lipids	Triterpenoids	12855917	63223-86-9
pos_1580	Cytochalasin Ppho	2.02231513768766e-06	5.85942586300369e-06	8.58159420779866e-06	2.80950331407087e-06	1.48545138810819e-06	2.7675325121469e-06	5.94030257461597e-07	2.42042217029902e-06	2.23592371688657e-06	2.0798195431665e-06	2.58804585484567e-06	1.43492734033384e-05	-0.373644044916436	0.959622645740894	0.110576986946048	unchanged	--	--	--	--	--	--	--	--	--	--	--	--	--	--	--	--
pos_1581	Bicine	3.32465260830242e-05	4.43551517234953e-05	6.01573571510839e-05	6.2727860533269e-05	6.77129142431036e-05	5.17899351532141e-05	6.11486570405317e-05	6.72517600660919e-05	5.31740606793428e-05	4.94444347734626e-05	5.47715157364273e-05	6.03420588372879e-05	0.145459627964287	0.481293658256313	0.732745163082886	unchanged	--	--	--	--	--	--	--	--	--	HMDB0011727	Organic compounds	Organic acids and derivatives	Carboxylic acids and derivatives	Amino acids, peptides, and analogues	8761	150-25-4
pos_1583	Adenosine thiamine diphosphate	0.000110538770041842	3.70429024710394e-05	2.62784758635501e-05	2.68874386852305e-05	7.16706232597671e-05	6.11305609306422e-05	5.48430639860791e-05	4.71001467406968e-05	3.36862494711639e-05	4.89989394372847e-05	4.46460300737138e-05	3.97683634499194e-05	-0.123943864753784	0.464148604332955	0.854751995730466	unchanged	--	--	--	--	--	--	--	--	--	--	--	--	--	--	--	--
pos_1584	N-Desmethyl-O-hydroxy rosiglitazone	1.23919114923134e-06	4.94836916839181e-07	9.24369904152406e-06	4.20005541935442e-06	1.93711057715684e-07	2.14372710224146e-06	1.57377923848678e-06	1.09142629410219e-05	3.79149121931355e-06	5.1121475529999e-06	3.48680807247641e-06	3.48679662782461e-06	1.44624635002097	0.368744078881797	0.792868763681285	unchanged	--	--	--	--	--	--	--	--	--	--	--	--	--	--	--	--
pos_1585	Clozapine N-oxide	5.62217009762899e-05	8.13321018175917e-05	4.98820178578077e-05	6.0507094328142e-05	6.02429590410528e-05	5.4546947671355e-05	5.63384365971026e-05	5.42279572007889e-05	6.06076717451043e-05	5.60964293630448e-05	5.7288828040887e-05	4.42153830561035e-05	-0.130916550658986	0.29486066933804	0.991808479513667	unchanged	--	--	--	--	--	--	--	--	--	--	--	--	--	--	--	--
pos_1586	Momordin Ie	5.81811040720406e-06	1.64746524336741e-06	3.98500723253615e-06	3.95224286929608e-06	5.01424239803321e-06	3.92671285420272e-06	5.83190709415525e-06	2.18854206820317e-06	2.49329087224965e-06	4.99696268081312e-06	5.55813578540371e-06	2.25716125548669e-06	-0.0958759044015984	0.856888118521571	0.285081223307389	unchanged	--	--	--	--	--	--	--	--	--	--	--	--	--	--	--	--
pos_1587	Citranaxanthin	0.00799363296520638	0.0095927733102461	0.0161755212895619	0.0130461855660852	0.00968451990832075	0.011164745666345	0.0107797991828605	0.0124917206865548	0.0137371178822304	0.0121838170929562	0.0132692369971618	0.0154726534488106	0.233844652160276	0.246294059733831	1.15476534854671	unchanged	--	--	--	--	--	--	--	--	--	--	--	--	--	--	--	--
pos_1588	Americanin A	0.000299001638564793	0.000703678033063322	0.000417483991614722	0.00028324510163985	0.000379281817548722	0.000393596118378069	0.000283097049232954	0.000353047963712016	0.00044327830663772	0.000451968912748708	0.000384619817565793	0.000420544629074801	-0.0329229556533122	0.740285185640457	0.208805311070037	unchanged	--	--	--	--	--	--	--	--	--	HMDB0030834	Organic compounds	Organoheterocyclic compounds	Benzodioxanes	Phenylbenzodioxanes	131751085	69506-79-2
pos_159	3-Phenoxypropionic acid	0.000267085998283779	0.000253766721764984	0.000219091532630167	0.000197918336437227	0.000387835709291643	0.000205377130073441	0.00032102722446668	0.000294744358121307	0.000241163630919486	0.000305325728047262	0.000240489970750206	0.000331684523196313	0.207890394130681	0.334414127056913	0.981425228388185	unchanged	--	--	--	--	--	--	--	--	--	HMDB0002229	Organic compounds	Benzenoids	Benzene and substituted derivatives	3-phenoxypropionic acids	81596	7170-38-9
pos_1590	D-Leucic acid	7.35008909937239e-05	4.30822588590672e-05	3.25275798175808e-05	3.20820776024331e-05	5.3054400642062e-05	4.982869749553e-05	5.58784924871053e-05	4.58752345517965e-05	4.26541026528532e-05	4.14271827572827e-05	4.33828638600441e-05	4.19381133903216e-05	-0.0140129762623129	0.758080336440338	0.330793976933866	unchanged	--	--	LMFA01050402	D-Leucic acid	2R-hydroxy-4-methyl-pentanoic acid	-	Fatty Acyls [FA]	Fatty Acids and Conjugates [FA01]	Hydroxy fatty acids [FA0105]	--	--	--	--	--	--	--
pos_1592	Momilactone C	6.25832720459067e-05	6.09828200300735e-05	4.0290737017433e-05	4.56346265759407e-05	3.96746818633165e-05	5.83152882311266e-05	3.67073210793872e-05	4.46022484192763e-05	3.06009738363214e-05	5.17871069702495e-05	3.97842748559111e-05	4.75297064523908e-05	-0.287744549105	0.111160621066237	1.50975669967774	unchanged	--	--	--	--	--	--	--	--	--	--	--	--	--	--	--	--
pos_1593	PG(16:0/18:2(9Z,12Z))	0.00358197465816406	0.00206570760671435	0.00195240461451631	0.00168230169400267	0.00194893987871906	0.00198369739311698	0.0021192676902532	0.00193471938099015	0.00202101024305674	0.00180430118109081	0.00187766596805002	0.00190392706219286	-0.135639274315839	0.402452400947008	0.981025410163603	unchanged	--	--	LMGP04010983	PG(16:0/18:2(9Z,12Z))	1-hexadecanoyl-2-(9Z,12Z-octadecadienoyl)-glycero-3-phospho-(1'-sn-glycerol)	PG(34:2); PG(16:0_18:2)	Glycerophospholipids [GP]	Glycerophosphoglycerols [GP04]	Diacylglycerophosphoglycerols [GP0401]	HMDB0010575	Organic compounds	Lipids and lipid-like molecules	Glycerophospholipids	Glycerophosphoglycerols	52927246	_
pos_1594	Kanokoside A	2.24607244132842e-06	5.87124758376792e-06	8.17574005933286e-07	4.03714347340454e-06	1.17372832603651e-05	4.56412780325508e-06	8.52291121903629e-06	6.38198627546893e-06	4.30528390121334e-06	3.76614241623263e-06	5.51192736128855e-06	8.33522481992369e-06	0.686522047119674	0.494471976290987	0.818704443527464	unchanged	--	--	--	--	--	--	--	--	--	--	--	--	--	--	--	--
pos_1595	Triamcinolone	4.23587054685506e-05	6.3638303863147e-05	3.3316144929404e-05	4.41608310269453e-05	5.66554328660266e-05	4.34642034285764e-05	5.16042126286092e-05	4.64061093969875e-05	4.06785590786299e-05	5.83688961645769e-05	4.25733788489232e-05	5.14717388543697e-05	0.0585698966378061	0.816192236367286	0.374474773196899	unchanged	--	--	--	--	--	--	--	--	--	--	--	--	--	--	--	--
pos_1597	3',5'-Diiodo-L-thyronine-beta-D-glucuronoside	3.47221615334842e-05	1.882461933281e-05	1.66573930610963e-05	1.40716601011524e-05	2.13662551688396e-05	2.16912261764233e-05	2.11801862347038e-05	1.8712990434916e-05	2.22659158233891e-05	1.65698598387661e-05	1.6114329415782e-05	1.66601883040283e-05	-0.14249594847761	0.430504760434812	0.883178160169765	unchanged	--	--	--	--	--	--	--	--	--	--	--	--	--	--	--	--
pos_1598	Cinitapride	6.05416001138834e-06	1.13090867963499e-05	1.14109998629875e-05	7.97982561162873e-06	6.5219052401703e-06	7.97527382157739e-06	8.58831762322314e-06	8.75559483236435e-06	9.19343091892664e-06	8.02808948476939e-06	8.56899349422263e-06	7.10598469224083e-06	0.00992095808494042	0.870536690894993	0.0427549377315232	unchanged	--	--	--	--	--	--	--	--	--	--	--	--	--	--	--	--
pos_16	Rosmarinic acid	0.000106549323105267	0.000152630676273147	7.66172275526354e-05	0.00011297110099191	9.70269591251537e-05	0.000107730813811139	9.52129694287776e-05	8.83630304853633e-05	7.71409622867316e-05	9.14951771930313e-05	8.44387760788476e-05	7.49904948636808e-05	-0.328051784190841	0.0691541648018971	1.70970046812197	unchanged	C01850	Metabolic pathways(ko01100);;Tyrosine metabolism(ko00350)	--	--	--	--	--	--	--	HMDB0003572	Organic compounds	Phenylpropanoids and polyketides	Cinnamic acids and derivatives	Hydroxycinnamic acids and derivatives	5281792	20283-92-5
pos_160	Digeranyl	1.25789557762962e-05	9.94107925631597e-07	4.84332043522883e-06	5.73116915222786e-06	7.82004673792524e-06	5.03615710442826e-06	2.20382177434675e-06	4.13421219777507e-06	4.72116212247764e-06	2.32450045588991e-06	4.07072254609721e-06	7.17590743767209e-06	-0.371102032973877	0.272900076983407	1.347610975782	unchanged	--	--	--	--	--	--	--	--	--	--	--	--	--	--	--	--
pos_1600	Galabiosylceramide (d18:1/20:0)	0.000172176001606859	0.00016554193557608	0.000193453919316712	0.00183039845475258	0.000184884400322876	3.45536872216312e-05	0.000148951063190657	0.000156135676987071	0.000223630229684894	5.10408100647003e-05	4.64463013482697e-05	6.93661305190577e-05	-1.03937928844839	0.315696508340509	1.18010527266224	unchanged	--	--	--	--	--	--	--	--	--	--	--	--	--	--	--	--
pos_1601	Prostaglandin E1	1.91593972699193e-05	2.38641258358305e-05	2.05176944393085e-05	2.00825220135139e-05	1.61592030643433e-05	2.06645577475575e-05	1.78624531565596e-05	2.1554358583368e-05	1.96380588935261e-05	1.91167914549937e-05	2.13174024148074e-05	1.75238617953666e-05	-0.0367440493711211	0.65282755341357	0.388724340177578	unchanged	--	--	LMFA03010134	PGE1	9-oxo-11R,15S-dihydroxy-13E-prostaenoic acid	Prostaglandin E1	Fatty Acyls [FA]	Eicosanoids [FA03]	Prostaglandins [FA0301]	HMDB0001442	Organic compounds	Lipids and lipid-like molecules	Fatty Acyls	Eicosanoids	5280723	745-65-3
pos_1602	(3S,5R,6R,6'S)-6,7-Didehydro-5,6-dihydro-3,5,6'-trihydroxy-13,14,20-trinor-3'-oxo-beta,epsilon-caroten-19',11'-olide 3-acetate	0.000680035087823227	0.000767394285518406	0.00094253058130084	0.000731669822805304	0.0011029450373854	0.000761578112811825	0.00113160465649987	0.000843613470129495	0.000631118716047596	0.000694200079269839	0.000748061790490779	0.000824286672404965	-0.0381906021748417	0.849523465374626	0.0982472434989779	unchanged	--	--	--	--	--	--	--	--	--	--	--	--	--	--	--	--
pos_1603	1-heneicosanoyl-glycero-3-phosphate	9.42844527616412e-06	9.62491307559328e-06	4.53952124822957e-06	5.38136178431674e-06	1.21484453391365e-05	9.29352485376643e-06	1.02377373795328e-05	1.35635712370537e-05	8.97440719709027e-06	1.1760934477947e-05	6.11081150915174e-06	1.46289139893164e-05	0.398020302891506	0.183971774346048	1.38914486692445	unchanged	--	--	LMGP10050032	PA(21:0/0:0)	1-heneicosanoyl-glycero-3-phosphate	LPA(21:0)	Glycerophospholipids [GP]	Glycerophosphates [GP10]	Monoacylglycerophosphates [GP1005]	--	--	--	--	--	--	--
pos_1604	PS(20:3(8Z,11Z,14Z)/18:0)	0.000244067663619478	0.000174504920762197	0.000162110767413334	0.000147840718654545	0.000164376700427672	0.000181871357062615	0.00018143630882601	0.000172779290581625	0.000178730486502056	0.000159974316871194	0.000175905902776867	0.000168012748777542	-0.0340170828168649	0.672783952224482	0.486113980631884	unchanged	--	--	LMGP03010600	PS(20:3(8Z,11Z,14Z)/18:0)	1-(8Z,11Z,14Z-eicosatrienoyl)-2-octadecanoyl-glycero-3-phosphoserine	PS(38:3); PS(18:0_20:3)	Glycerophospholipids [GP]	Glycerophosphoserines [GP03]	Diacylglycerophosphoserines [GP0301]	HMDB0012422	Organic compounds	Lipids and lipid-like molecules	Glycerophospholipids	Glycerophosphoserines	52925710	_
pos_1606	9-Oxoasimicinone	9.59560698251885e-06	5.23168316002417e-06	2.80385970353847e-06	1.31654607631304e-06	2.04777327338823e-06	8.31779586635507e-07	2.3061787551492e-06	7.09185036523205e-07	1.20249699866545e-06	4.97258196635482e-07	1.33427229552302e-06	1.54890931039916e-06	-1.21450101713838	0.140672123443859	1.60342483070634	unchanged	--	--	--	--	--	--	--	--	--	--	--	--	--	--	--	--
pos_1607	Naringenin	5.63174852543907e-05	3.97383309847816e-05	2.43081124628347e-05	2.50765861262354e-05	2.57773574427496e-05	3.28175833933744e-05	2.4018482673364e-05	5.13658638431454e-05	8.91669215447366e-05	1.65611102830575e-05	5.24246728191248e-05	9.4091609529793e-05	0.493518092665491	0.189583045043364	1.33865374787509	unchanged	C00509	Metabolic pathways(ko01100)	LMPK12140001	Naringenin	-	-	Polyketides [PK]	Flavonoids [PK12]	Flavanones [PK1214]	--	--	--	--	--	--	--
pos_1608	3-Methyl-2-cyclohexen-1-one	1.07641129535574e-05	3.13081450404998e-05	1.55587512672173e-05	8.7036246128396e-06	1.68010559922686e-05	1.54439431194422e-05	1.29240570225116e-05	1.25784390820072e-05	8.46399490718897e-06	2.58095071685192e-05	1.45310466811327e-05	1.21965816923747e-05	-0.151972395439323	0.630376686553512	0.373190119608262	unchanged	--	--	--	--	--	--	--	--	--	HMDB0031541	Organic compounds	Organic oxygen compounds	Organooxygen compounds	Carbonyl compounds	14511	1193-18-6
pos_161	17-Hydroxylinolenic acid	7.89481005169067e-05	8.4574127444939e-05	7.23647571538107e-05	8.72012637572123e-05	7.52126870360692e-05	7.63658937539096e-05	8.26695658547687e-05	8.29774248967317e-05	7.74996187063859e-05	7.27282872283349e-05	7.70777839100036e-05	8.42936269707808e-05	0.00897632227257894	0.887894348497411	0.251169652360711	unchanged	C16346	alpha-Linolenic acid metabolism(ko00592)	--	--	--	--	--	--	--	--	--	--	--	--	--	--
pos_1611	TG(18:2(9Z,12Z)/14:0/20:4(5Z,8Z,11Z,14Z))[iso6]	9.57141780985631e-06	2.51218084335653e-06	1.43977612697394e-06	1.186131088711e-06	2.01588530738649e-06	2.11610292482058e-06	2.35385674181386e-06	0	0	0	1.95313377470013e-06	5.23493790777615e-07	-12.1653563023165	0.1388434244503	1.59599367990438	unchanged	--	--	--	--	--	--	--	--	--	--	--	--	--	--	--	--
pos_1613	Feruloyl-beta-sitosterol	0.000282397329577954	0.000310546816488232	0.000246492109366684	0.000241776326991667	0.000258866032217042	0.000274943898255317	0.000253733056945859	0.000265549431241939	0.000273089548525294	0.000273829267690725	0.000263417352169935	0.000247197607711498	-0.0301894620469394	0.592569632219739	0.460857832865984	unchanged	--	--	--	--	--	--	--	--	--	--	--	--	--	--	--	--
pos_1615	Ganglioside GA2 (d18:1/25:0)	2.97034406782987e-05	4.26751858501643e-05	3.63692192368714e-05	2.93955264217929e-05	3.13123528204733e-05	3.27922837013199e-05	2.96896753278467e-05	3.25527796682084e-05	3.74241661111108e-05	3.10429101299852e-05	3.39212074167424e-05	2.37789398308487e-05	-0.103263733065493	0.42818179608048	0.743118872603722	unchanged	--	--	--	--	--	--	--	--	--	--	--	--	--	--	--	--
pos_1616	DG(14:0/20:5(5Z,8Z,11Z,14Z,17Z)/0:0)	0.000352682469001256	0.000441885432569148	0.000927133460981403	0.000320119474223815	0.000473274608305006	0.000500635966465577	0.000530534624055912	0.000607434605271728	0.000388106533103674	0.000736191326838663	0.000843134583448218	0.000654212290703394	0.368727017980458	0.290792309940739	1.05858627287822	unchanged	--	--	--	--	--	--	--	--	--	HMDB0007027	Organic compounds	Lipids and lipid-like molecules	Glycerolipids	Diradylglycerols	53477962	_
pos_1617	3a,20b-Pregnanediol	3.16236185059429e-06	6.32058290304689e-06	1.1564157443689e-06	1.85388723885207e-06	1.01288886662699e-06	8.2463432631686e-07	1.21964978334529e-06	3.31712120714758e-06	1.22052989610274e-06	1.46397988794263e-06	1.25639659951134e-06	1.36317017472516e-06	-0.255252729227127	0.446698061179158	0.740047329655525	unchanged	--	--	LMST02030198	-	3a,20b-Pregnanediol	-	Sterol Lipids [ST]	Steroids [ST02]	C21 steroids (gluco/mineralocorticoids, progestogins) and derivatives [ST0203]	--	--	--	--	--	--	--
pos_1618	(1R,2R,4S,6R)-2,6-Fenchanediol 2-O-b-D-glucoside	4.19644053786627e-06	5.64650553161975e-06	4.45305040887509e-06	4.04346061968461e-06	4.30605841059636e-06	4.72730808805617e-06	4.60795257094901e-06	3.4334910306479e-06	5.08278708000809e-06	4.29815972667049e-06	4.05802633115663e-06	5.16618888163797e-06	-0.0435460248165462	0.741944147129587	0.105602768296471	unchanged	--	--	--	--	--	--	--	--	--	--	--	--	--	--	--	--
pos_1619	LysoPC(20:0)	5.47525504728951e-06	7.81402419860919e-08	1.07197648392311e-06	1.22792305766584e-06	2.92375407808484e-06	1.67764641876979e-06	3.09674757754416e-06	2.45883804999262e-06	1.16141578616859e-06	1.4242817037816e-06	1.25534951049541e-06	2.4840527512071e-06	0.638290783144406	0.91309171876972	0.228104593202482	unchanged	C04230	Glycerophospholipid metabolism(ko00564);;Choline metabolism in cancer(ko05231)	--	--	--	--	--	--	--	HMDB0010390	Organic compounds	Lipids and lipid-like molecules	Glycerophospholipids	Glycerophosphocholines	24779473	108341-80-6
pos_1621	4-(3-Pyridyl)-3-butenoic acid	0.000112070737253826	6.61803270347901e-05	5.598866846837e-05	5.14717379069964e-05	7.99001818813745e-05	8.95628874411903e-05	9.22304183589085e-05	7.08732865615029e-05	7.36563586802849e-05	7.17370009932758e-05	7.37749564945971e-05	9.84213880841594e-05	0.118893299841233	0.697089854950273	0.47395650263438	unchanged	--	--	--	--	--	--	--	--	--	--	--	--	--	--	--	--
pos_1622	Dimethylamphetamine	2.98187236064786e-05	4.91203788506302e-05	3.09617375828855e-05	2.43302893985713e-05	2.89325200807554e-05	3.21690000718588e-05	1.54686675384258e-05	2.41575652965338e-05	1.94499274950036e-05	3.70453378319352e-05	2.83226356938317e-05	4.56360140008576e-05	-0.260189020070596	0.484467893842114	0.644392587576328	unchanged	--	--	--	--	--	--	--	--	--	HMDB0041880	Organic compounds	Benzenoids	Benzene and substituted derivatives	Phenethylamines	20006	4075-96-1
pos_1623	Nonivamide	6.35340978612345e-05	3.65764378166219e-05	1.4632278924909e-05	8.28638047619001e-05	1.38549669418466e-06	3.7152147158804e-05	2.15370733757334e-05	1.66368135511556e-05	4.55808533874801e-06	7.99201991972338e-05	2.56321313611458e-05	1.33097198084846e-05	-0.283927989520064	0.469165703651352	0.833453817359371	unchanged	--	--	LMFA08020317	Nonivamide	N-vanillyl-nonamide	pelargonic acid vanillylamide; PAVA	Fatty Acyls [FA]	Fatty amides [FA08]	N-acyl amines [FA0802]	--	--	--	--	--	--	--
pos_1624	Janthitrem B	0.000149029000104752	0.000111748707320662	9.76676222075067e-05	8.94228996275647e-05	9.57083184583631e-05	0.000110043152610107	0.000109706340186989	0.000106034933128472	0.000110171355698059	9.71058335463032e-05	0.000104337588335263	0.000101840377035803	-0.0353618512038576	0.667742947221421	0.469903441953132	unchanged	--	--	--	--	--	--	--	--	--	--	--	--	--	--	--	--
pos_1625	Ganoderic acid alpha	4.23279831873222e-05	4.90376901774035e-05	5.89756677415335e-05	5.43774228263243e-05	2.86621710715897e-05	4.09791572549043e-05	3.51921345354418e-05	4.88508148337297e-05	5.18487900872888e-05	4.1125938820292e-05	4.5178908424475e-05	3.98436562606408e-05	-0.0407790947391948	0.697028499636764	0.487362184033869	unchanged	--	--	--	--	--	--	--	--	--	--	--	--	--	--	--	--
pos_1626	6,8-Tricosanedione	0.000128296888814361	0.000134483435930325	0.000141120252279814	0.000144478263331222	9.7014767292097e-05	0.000125317786909469	0.000125557323573814	0.00014256414317575	0.00013297951817512	0.000121466993667867	0.00013285525592535	0.000152999615859303	0.076424906271388	0.473569715123413	0.767540830148886	unchanged	--	--	--	--	--	--	--	--	--	--	--	--	--	--	--	--
pos_1628	(-)-Wikstromol	8.36015418159192e-07	5.3941741910649e-07	1.64095145242075e-06	3.68810805778988e-10	9.68286533483116e-07	3.5112930338493e-07	5.05206278600753e-08	9.03042577753792e-08	1.94429339467174e-07	1.54713062525534e-06	8.09103145323347e-07	4.0622155153074e-05	1.48751670601073	0.37594483117652	0.999076832192472	unchanged	--	--	--	--	--	--	--	--	--	--	--	--	--	--	--	--
pos_1629	PE(18:4(6Z,9Z,12Z,15Z)/P-16:0)	0.000199023354274727	0.000236699912332784	0.000216916735809925	0.000217102349369922	0.000173328560908109	0.0002131036716824	0.000190920512365926	0.000210697565912414	0.00022232976180513	0.000195410387299717	0.000206533524548154	0.000199014046756049	-0.0316630356223921	0.613516324436343	0.435501480044408	unchanged	--	--	--	--	--	--	--	--	--	--	--	--	--	--	--	--
pos_163	2-Ethoxy-4-(methoxymethyl)phenol	0.000154677524274375	0.000141002155800252	0.000212425013112057	9.04179474058488e-05	0.000149436927734999	0.000143293699323823	9.47509082247864e-05	0.000128508465401547	0.000103563951814578	0.00021802410902794	0.000149826536592861	0.000164095730975772	-0.0680353080640828	0.828659846580806	0.318523170986552	unchanged	--	--	--	--	--	--	--	--	--	--	--	--	--	--	--	--
pos_1630	PE(14:1(9Z)/22:1(13Z))	0.000164965874678097	0.000153469267772032	4.8914318304038e-06	2.62947519467306e-06	5.91474745947369e-06	7.32097858797043e-05	1.67414798942142e-06	0	4.46792369598116e-06	0	2.37792264427274e-06	1.9006238593453e-06	-11.0882777207657	0.0873620802933436	1.73007148309931	unchanged	--	--	--	--	--	--	--	--	--	HMDB0008875	Organic compounds	Lipids and lipid-like molecules	Glycerophospholipids	Glycerophosphoethanolamines	53479566	_
pos_1631	Tracheloside	1.66452373578376e-05	1.77956979358661e-05	5.34882567686472e-07	1.23479593262546e-05	1.28909158167391e-05	1.12371211042084e-05	5.92487308046816e-06	3.86411728399051e-06	2.21324170519567e-06	1.39265107170662e-05	7.46050978581358e-06	2.34637703859357e-06	-0.75331954007801	0.0853367325908614	1.68741595459898	unchanged	--	--	--	--	--	--	--	--	--	--	--	--	--	--	--	--
pos_1632	Physapruin B	0.0196621530718676	0.012081738598319	0.011386381577055	0.0102584370355734	0.0117196476801887	0.0126345106777243	0.0126860163558693	0.0119041124200605	0.0124022990613122	0.0111396672651146	0.0119575395698322	0.0115861200037584	-0.0845562842958323	0.500369637406919	0.795136952971223	unchanged	--	--	--	--	--	--	--	--	--	--	--	--	--	--	--	--
pos_1633	Tetracosahexaenoic acid	0.000159379367504349	0.000183401989900968	0.000154698471403379	0.000165046142573777	0.000213731043092909	0.000168610103711334	0.000318394322657193	0.000234845069770126	0.000193238291807224	0.000225713467567169	0.000193225132662388	0.000232211492262035	0.407304927984015	0.0245999985554968	2.30449557623729	up	--	--	LMFA01030804	tetracosahexaenoic acid	2E,4E,6E,8E,10E,12E-tetracosahexaenoic acid	C24:6n-12,14,16,18,20,22	Fatty Acyls [FA]	Fatty Acids and Conjugates [FA01]	Unsaturated fatty acids [FA0103]	--	--	--	--	--	--	--
pos_1634	Ustiloxin D	0.000322314490112389	0.000278986620757007	0.000282167294121911	0.000236713031378756	0.000318645996362427	0.000300117359067059	0.000246096166259851	0.000283695664274312	0.000271489744994839	0.000259739079328867	0.000278558359206925	0.000379298873185858	-0.0238324026196182	0.888992540925484	0.157331965213318	unchanged	--	--	--	--	--	--	--	--	--	--	--	--	--	--	--	--
pos_1635	Physoperuvine	2.5152093612814e-05	1.1239285310179e-05	9.21100074419592e-06	1.21216878139533e-05	1.84883315504883e-05	1.89497067481965e-05	1.41647722788119e-05	0.00010854589383931	1.44545904383333e-05	9.11434389196969e-06	2.53353333545625e-05	7.58540244361584e-06	0.302614630135267	0.423169141729824	0.776309493843809	unchanged	--	--	--	--	--	--	--	--	--	--	--	--	--	--	--	--
pos_1636	Clemastine	7.31393086903216e-05	8.28802015039324e-05	3.43223581016808e-05	7.66851536073604e-05	4.99552057000779e-05	5.95051010062279e-05	6.47811874935401e-05	5.08029551131451e-05	4.75758354564678e-05	9.64038081574031e-05	5.92930485629737e-05	4.00301345873166e-05	-0.0674438239039929	0.796423348860219	0.255797094549597	unchanged	--	--	--	--	--	--	--	--	--	--	--	--	--	--	--	--
pos_1637	Jurubine	0.000380332323064151	0.000564024648187336	0.0004528892472529	0.00047007748517538	0.000350375223114639	0.000516050059095745	0.000432392328253198	0.000508747117818037	0.00048140283866023	0.000391985131396682	0.000515946944796944	0.000426855941264943	0.0244696318362667	0.921404037573617	0.287162931975668	unchanged	--	--	LMST01070002	Jurubine	3beta-amino-26-O-[beta-D-glucopyranosyl]-25R-furostan-22alpha,26-diol	-	Sterol Lipids [ST]	Sterols [ST01]	Furostanols and derivatives [ST0107]	--	--	--	--	--	--	--
pos_1638	Medroxyprogesterone	4.62082282165642e-06	7.88782391233393e-06	2.27317462473964e-06	3.08029667935298e-06	2.58274211590196e-06	3.28507832294601e-06	1.50005230396757e-08	1.26790864598689e-06	5.47319587381108e-06	2.06197923004617e-06	2.95892353530915e-06	1.23022942247728e-06	-1.90606096745048	0.151750675079868	1.40693907005383	unchanged	--	--	LMST02030176	medroxyprogesterone	(6alpha)-17-hydroxy-6-methylpregn-4-ene-3,20-dione	17-Hydroxy-6alpha-methyl-pregn-4-ene-3,20-dione; 17-Hydroxy-6alpha-methylprogesterone; 17alpha-Hydroxy-6alpha-methylprogesterone; 6alpha-Methyl-17alpha-hydroxyprogesterone; 6alpha-Methyl-4-pregnen-17alpha-ol-3,20-dione; Medroxyprogesteron	Sterol Lipids [ST]	Steroids [ST02]	C21 steroids (gluco/mineralocorticoids, progestogins) and derivatives [ST0203]	--	--	--	--	--	--	--
pos_1639	(Z)-1,5-Tridecadiene	2.20375012419654e-07	4.91313685478066e-07	8.09690350823846e-07	1.48391461418599e-06	7.55462601628791e-07	7.10097639153105e-07	1.23799679878923e-07	4.35734484718335e-07	8.42839280149113e-07	6.11823501749816e-07	3.55200149260156e-07	6.26577220993217e-07	-0.582455803103617	0.254141400760204	1.27467758859122	unchanged	--	--	--	--	--	--	--	--	--	--	--	--	--	--	--	--
pos_164	delta3,5-Deoxytigogenin	0.00014429204914987	0.000127758672645708	7.34291006266935e-05	0.000155827395256847	0.000116557046928398	0.000127960021843908	0.000166810355639073	0.000128430077174762	9.60295839375154e-05	0.000279338064091995	0.000154008559841529	0.000104258293628264	0.258735421528511	0.339339842588595	0.966152622302876	unchanged	--	--	--	--	--	--	--	--	--	--	--	--	--	--	--	--
pos_1640	Curdione	0.000156550109802598	0.000209425324660752	0.000265044962585841	0.000216368092922744	0.000189179369953509	0.000208651292711416	0.000158548691953624	0.00021570604149642	0.00020780409084531	0.000180771522158723	0.000203911723894399	0.000263020881431366	-0.0178546409227316	0.902313972312452	0.120154713288565	unchanged	--	--	--	--	--	--	--	--	--	HMDB0034714	Organic compounds	Lipids and lipid-like molecules	Prenol lipids	Sesquiterpenoids	5362828	13657-68-6
pos_1641	(3a,5b,7a)-23-Carboxy-7-hydroxy-24-norcholan-3-yl-b-D-Glucopyranosiduronic acid	0.00109591638421683	0.000639156903715317	0.000876167474293206	0.000808159890270523	0.000717519419663392	0.000831303658877772	0.000931784038154627	0.000904758208538929	0.00062002096435547	0.000761048142123979	0.000824844512144125	0.000861023566658243	-0.011078211775633	0.8943022085114	0.211297015312548	unchanged	--	--	--	--	--	--	--	--	--	--	--	--	--	--	--	--
pos_1642	Farnesiferol A	0.000188190404887723	0.000250160072430365	0.000232520130119022	0.000218608809766453	0.000177840855389861	0.000210304823669846	0.00019544740465807	0.000217301756970972	0.000227513976616376	0.000199357203463169	0.000212925547718925	0.000204703001142343	-0.0153580030225058	0.786737041111739	0.179179037745628	unchanged	--	--	--	--	--	--	--	--	--	--	--	--	--	--	--	--
pos_1643	leukotriene-f4	0.00136558368433184	0.00112288270810912	0.00110718632956502	0.00117375777808562	0.00137908268799373	0.00143232484508309	0.00209937118917144	0.0015001887296781	0.00108708412526509	0.00168871281252921	0.00162841223424897	0.00143503074960802	0.296535180149911	0.0759940831818736	1.89395285509205	unchanged	--	--	--	--	--	--	--	--	--	--	--	--	--	--	--	--
pos_1644	Soyasaponin A3	2.59582313932326e-05	4.25335591256605e-06	3.3953377746853e-05	1.40747292008032e-05	6.45860166166418e-06	2.26115925714578e-05	3.50285823757499e-05	3.03717792430619e-05	1.4354238348867e-05	2.33296503603823e-05	2.02690464406225e-05	2.22959317961755e-05	0.730846667811003	0.286991451823282	1.10127231340711	unchanged	--	--	--	--	--	--	--	--	--	--	--	--	--	--	--	--
pos_1645	Cyanidin 3-(6''-acetyl-galactoside)	0	0	0	0	1.95660208234629e-05	1.63487232297772e-06	0.000172531415981951	0.000102641217331303	0	0	4.96795931878143e-05	2.91251027465481e-06	10.1378833142634	0.136679158235853	1.69619452686514	unchanged	--	--	--	--	--	--	--	--	--	--	--	--	--	--	--	--
pos_1646	(S)-Nerolidol 3-O-[a-L-rhamnopyranosyl-(1->2)-b-D-glucopyranoside]	0.000125093462258903	5.07921955399136e-05	4.5012015369398e-05	3.90102319255918e-05	7.54777202942564e-05	7.74434296426746e-05	7.54167387217144e-05	6.28389542911405e-05	5.53473779009427e-05	5.64819706156489e-05	6.50453480593191e-05	6.27936995694222e-05	-0.0179971214042176	0.678955583065787	0.485758545803759	unchanged	--	--	--	--	--	--	--	--	--	--	--	--	--	--	--	--
pos_1647	clofarabind-5'-monophosphate	9.21157385396969e-06	5.29076884541887e-07	4.10094324177461e-07	9.65395706192268e-07	4.27957049332872e-06	3.10469487821626e-06	3.20387159838713e-06	2.28806570864135e-06	1.81197151896192e-06	1.47898277579508e-06	2.25322985379714e-06	2.42540624836847e-06	0.34436613117942	0.573537080748715	0.707743130700047	unchanged	--	--	--	--	--	--	--	--	--	--	--	--	--	--	--	--
pos_1648	Madlongiside C	0.000100620959773235	5.37207217997651e-05	3.95328431112611e-05	3.89203864234746e-05	6.47860650972345e-05	6.58723650229123e-05	6.95139617916968e-05	6.17906091993504e-05	5.51498049694056e-05	5.59812067694381e-05	5.67666552057748e-05	6.00227758342579e-05	0.0580450406638473	0.94392401120294	0.0916783500073778	unchanged	--	--	--	--	--	--	--	--	--	--	--	--	--	--	--	--
pos_165	1-(4-Methoxyphenyl)-2-propanone	0.000353011038432772	0.000256361877136096	0.000247308818224101	0.000215938648237596	0.000239781989303339	0.000248740563352113	0.0002575588917472	0.000250701871704514	0.000255878978663856	0.000247255884769618	0.000249128818532192	0.000250397201886985	-0.0296238875525638	0.685055305359748	0.511778788871187	unchanged	--	--	--	--	--	--	--	--	--	--	--	--	--	--	--	--
pos_1650	Laurotetanine	4.17754905934843e-05	5.28676126261833e-05	3.16799116959406e-05	5.01418439340297e-05	4.52247893172907e-05	4.24352152758201e-05	4.07413740632583e-05	3.95459796145418e-05	4.40534826420378e-05	5.71261047642463e-05	4.98238509557601e-05	5.31323119719305e-05	0.11214297298474	0.438642279019407	0.817409791903796	unchanged	--	--	--	--	--	--	--	--	--	HMDB0030220	Organic compounds	Alkaloids and derivatives	Aporphines	_	267400	128-76-7
pos_1651	Levobunolol	2.14796746432432e-05	1.95618571136604e-05	1.22211083507173e-05	3.89402509101125e-05	1.74477180946582e-05	2.10506792101879e-05	1.3345941559181e-05	1.18996835492435e-05	1.2853802632223e-05	1.81956248382584e-05	1.48261488998643e-05	1.63555907943916e-05	-0.50458650706171	0.11113880071548	1.71710848767756	unchanged	--	--	--	--	--	--	--	--	--	--	--	--	--	--	--	--
pos_1652	(7Z,10Z,13Z,16Z)-docosatetraenoate	3.8222530913392e-05	5.76585430775405e-05	7.74337357029886e-05	0.00012278307452229	6.3028252875321e-05	6.95625012603061e-05	7.64957418204415e-05	9.60198725092242e-05	4.86228360901885e-05	6.12540852279696e-05	7.72818129602872e-05	7.69507790383796e-05	0.0836582049445518	0.923538376277744	0.084637732893208	unchanged	C16527	Biosynthesis of unsaturated fatty acids(ko01040);;Ferroptosis(ko04216)	--	--	--	--	--	--	--	HMDB0002226	Organic compounds	Lipids and lipid-like molecules	Fatty Acyls	Fatty acids and conjugates	5497181	28874-58-0
pos_1653	3,8-Dihydroxy-6-methoxy-7(11)-eremophilen-12,8-olide	6.06324947033425e-06	8.57988856873519e-06	1.26511166039424e-06	4.53849361562092e-06	8.88643537148372e-06	5.93706403160147e-06	1.60317723886771e-06	1.19583604818397e-06	2.15225514203341e-06	5.84955415754121e-06	1.49648939819358e-06	1.20357869491511e-06	-1.41697349840234	0.0271142466505614	2.06994246045655	down	--	--	--	--	--	--	--	--	--	--	--	--	--	--	--	--
pos_1654	(3E,5Z)-1,3,5-Tridecatriene-7,9,11-triyne	9.06541925384348e-06	1.36964598706159e-05	8.06091432434758e-06	1.27691508060175e-05	1.12247242211114e-05	1.15113795518312e-05	9.3593937336065e-06	9.01917779240651e-06	1.17808246486053e-05	1.1652984602397e-05	9.48864788831384e-06	8.62406407764855e-06	-0.133376388734892	0.333549616048413	0.917789387678945	unchanged	--	--	--	--	--	--	--	--	--	--	--	--	--	--	--	--
pos_1655	3-O-Protocatechuoylceanothic acid	5.18095489239987e-06	1.99381059651376e-05	8.65047908198874e-08	1.32110313482201e-07	3.09477453660808e-06	7.60859794427739e-06	2.14106870653884e-06	5.55643947747025e-06	9.32724645184409e-07	5.64896428912855e-06	9.28569429033314e-06	1.9030771646134e-06	0.886077816956391	0.609730100758573	0.378602895409607	unchanged	--	--	--	--	--	--	--	--	--	--	--	--	--	--	--	--
pos_1656	3-O-Sulfogalactosylceramide (d18:1/24:1(15Z))	2.36439943498236e-06	3.26678607256323e-06	1.09331147437155e-05	1.88454742719494e-05	1.19126488056312e-05	1.39426664300017e-05	2.71662582380538e-05	1.45823699649534e-05	5.01549469323858e-06	4.46071574390799e-06	1.34455021925829e-05	1.66073311497819e-05	0.484063853883324	0.456488795556606	0.908052641437746	unchanged	--	--	--	--	--	--	--	--	--	--	--	--	--	--	--	--
pos_1657	3-O-Sulfogalactosylceramide (d18:1/20:0)	0.000401397362036678	0.000254520483641941	0.000236081385440137	0.000210471899698022	0.000253511225179201	0.000279996516761332	0.000276523317943342	0.0002580631357844	0.000263579714874825	0.000236918093424841	0.000256918566116986	0.000246662623981176	-0.0585966875994082	0.585245319899298	0.627472402100612	unchanged	--	--	--	--	--	--	--	--	--	--	--	--	--	--	--	--
pos_1658	Serratol	4.55942843215629e-05	2.63921903545958e-05	2.2050409910681e-05	2.27953527641292e-05	1.49432289940826e-05	1.67321665351241e-05	1.66811205257417e-05	2.09247199462063e-05	2.11925019243239e-05	2.08456456676908e-05	1.95824234500931e-05	1.78222028363768e-05	-0.248444331510663	0.300398148807542	1.25165124866483	unchanged	--	--	--	--	--	--	--	--	--	HMDB0039827	Organic compounds	Lipids and lipid-like molecules	Prenol lipids	Diterpenoids	101618281	67814-27-1
pos_1659	2-Propenyl cyclohexanehexanoate	6.6820657276052e-06	7.34377256156783e-06	1.14067538931306e-05	1.03331136015566e-05	5.1197913333794e-06	6.20221546194353e-06	5.45252281328195e-06	6.17834877146806e-06	1.87273852356053e-05	7.74246170525618e-06	9.32337719329765e-06	6.06283283289072e-06	0.0980260142589451	0.65367566456652	0.370102782261571	unchanged	--	--	LMFA07010744	2-Propenyl cyclohexanehexanoate	prop-2-en-1-yl 6-cyclohexylhexanoate	-	Fatty Acyls [FA]	Fatty esters [FA07]	Wax monoesters [FA0701]	--	--	--	--	--	--	--
pos_166	Maslinic Acid	0.00076307701483257	0.000606030855513788	0.000416390005206997	0.000520553562459443	0.000328941823073782	0.000537534741752601	0.00063635478459471	0.000671547527114256	0.000367817996141012	0.000714395733712287	0.000608934902311823	0.000744963611385631	0.253850317397413	0.275954150808199	1.14337713282483	unchanged	--	--	LMPR0106180014	Maslinic acid	2alpha,3beta-dihydroxyurs-12-en-29-oic acid	-	Prenol Lipids [PR]	Isoprenoids [PR01]	C30 isoprenoids (triterpenes) [PR0106]	--	--	--	--	--	--	--
pos_1660	Talaromycin A	0.000105286828510063	9.96814092220441e-05	0.000147530937334115	0.000138883908889475	0.000155579116157586	0.000138370049804309	0.000126742240851358	0.000126276224750595	0.000149533432019621	0.000133685812854779	0.00013598707261168	0.000135547772012717	0.0582112301740736	0.720318666635207	0.284496737389629	unchanged	--	--	--	--	--	--	--	--	--	--	--	--	--	--	--	--
pos_1661	PGP(16:1(9Z)/18:2(9Z,12Z))	2.93281299241309e-05	1.09743705561238e-05	1.06105331922654e-05	9.55467889055617e-06	1.72354402308556e-05	1.73349859393937e-05	1.46261285697008e-05	1.38891337057238e-05	1.53588434529149e-05	1.40357306840507e-05	1.29185647853683e-05	1.37897644623439e-05	-0.0535904343021052	0.593764946214696	0.668710493083118	unchanged	--	--	--	--	--	--	--	--	--	HMDB0013492	Organic compounds	Lipids and lipid-like molecules	Glycerophospholipids	Glycerophosphoglycerophosphates	53481812	_
pos_1662	Linoleoyl ethanolamide	1.04558333504073e-05	1.1984695330253e-05	1.09375573644376e-05	1.24195061970836e-05	1.01236618399633e-05	1.10536026872802e-05	1.07733449820655e-05	8.79488281743722e-06	7.87724213085164e-06	1.02609217450509e-05	9.17628165015446e-06	7.73941146716757e-06	-0.301374140246885	0.00876152179642622	2.26848435833624	down	--	--	--	--	--	--	--	--	--	HMDB0013624	Organic compounds	Organic nitrogen compounds	Organonitrogen compounds	Amines	5283449	_
pos_1663	3-(10-Heptadecenyl)phenol	8.91714440756696e-05	0.000135254985997463	0.000137440983802143	0.000108267423178583	0.00010871552639758	0.000111147003512164	9.35188970788987e-05	0.000155322839693277	0.000135196560297011	0.000103535482011753	0.000139323951338686	0.000260791220035099	0.294724687398592	0.245829866323281	1.26297847703743	unchanged	--	--	--	--	--	--	--	--	--	--	--	--	--	--	--	--
pos_1664	PC(15:0/15:0)	0.000178610305347425	0.000229343342415696	0.00074949462253572	0.000139912419704229	0.000281277035256201	0.000324300897435274	0.000394046732472684	0.000447281254579183	0.000183684590320682	0.000574161195527899	0.000706408094896231	0.000584689563430437	0.715386147375691	0.192569311328773	1.29753611997899	unchanged	--	--	LMGP01010530	PC(15:0/15:0)	1,2-dipentadecanoyl-sn-glycero-3-phosphocholine	Pentadecanoin, 1,2-di-, phosphate, ester with choline, L-; 1,2-Dipentadecanoyl-sn-glycero-3-phosphocholine; L-alpha-Dipentadecanoyl phosphatidylcholine; PC(30:0); PC(15:0_15:0)	Glycerophospholipids [GP]	Glycerophosphocholines [GP01]	Diacylglycerophosphocholines [GP0101]	HMDB0007934	Organic compounds	Lipids and lipid-like molecules	Glycerophospholipids	Glycerophosphocholines	24778654	_
pos_1666	Cohibin A	4.1687988350618e-06	1.05105567210309e-05	8.47709174694284e-06	1.19597276066396e-05	4.74523764292399e-06	8.95389388389224e-06	2.20692649365523e-05	6.6424215276938e-06	1.40918728939529e-05	1.26929645698226e-05	1.14401285172593e-05	4.71664554004009e-06	0.484356764386582	0.215155458435309	1.44215806779479	unchanged	--	--	--	--	--	--	--	--	--	--	--	--	--	--	--	--
pos_1667	(3alphaOH,20S,24S)-3,19:20,24-Diepoxydammarane-3,25-diol	6.38718472195445e-05	0.00010097940963295	6.9172858740221e-05	7.86197518642519e-05	5.10903685191579e-05	7.98088908741634e-05	6.71735134628036e-05	6.86728575872906e-05	9.49016911727572e-05	7.34704786407031e-05	0.00011109292306772	9.18798259333791e-05	0.199800994464837	0.311905738360435	1.139154691951	unchanged	--	--	--	--	--	--	--	--	--	--	--	--	--	--	--	--
pos_1668	LysoPE(0:0/20:0)	0.000258673887873408	0.000257763867564519	0.000258717956283284	0.000249819483903825	0.0002451147725585	0.00027173818294925	0.0001946568253492	0.000235988033214815	0.000284115975797601	0.000217513370310954	0.000246629357341745	0.000280649098022003	-0.0911304591805493	0.391941578104603	0.939818645242789	unchanged	--	--	--	--	--	--	--	--	--	HMDB0011481	Organic compounds	Lipids and lipid-like molecules	Glycerophospholipids	Glycerophosphoethanolamines	53480930	_
pos_1669	Epimetendiol	4.31545741645924e-05	5.0495137192861e-05	4.57364107528493e-05	4.94550253269777e-05	4.0901727250148e-05	4.79685760872012e-05	4.18091555913318e-05	4.25008422378778e-05	5.08048571777306e-05	5.12286675812032e-05	4.69083069423442e-05	4.27234572354362e-05	-0.0102116069928702	0.903262019288543	0.102295748421986	unchanged	--	--	--	--	--	--	--	--	--	--	--	--	--	--	--	--
pos_1670	Arvensoside D	2.00895816150626e-05	2.30854086036715e-05	3.04226188805094e-05	2.32505355303372e-05	2.51663916528978e-05	2.15299692998726e-05	2.66274400238484e-05	3.27803271495349e-05	2.72583683622384e-05	2.12411641810007e-05	2.88056887052572e-05	3.71119987131265e-05	0.26731062694236	0.09283787415954	1.66225399840583	unchanged	--	--	--	--	--	--	--	--	--	--	--	--	--	--	--	--
pos_1672	CE(20:4(5Z,8Z,11Z,14Z)	0.000291185389947436	6.33061966217912e-05	7.16307028178639e-05	5.2854109670935e-05	0.000164696527168898	0.000157700784083215	0.000134494442137282	0.000120773532901511	8.78929733670662e-05	9.73983809162574e-05	0.000113697520208945	9.55453264033622e-05	-0.0438326349424614	0.533330155677412	0.74843311892975	unchanged	--	--	--	--	--	--	--	--	--	--	--	--	--	--	--	--
pos_1674	(3S)-3,6-Diaminohexanoate	3.11638858498119e-06	4.75339500616657e-06	1.53766140368263e-06	6.87064121847629e-06	4.26530710484217e-07	3.21610352205684e-06	2.67526520302476e-06	1.48111586792127e-06	3.38703332466646e-07	9.58351085696189e-07	1.05807828428554e-06	3.91072437034555e-07	-1.44266842974763	0.0702757141040066	1.75721628104636	unchanged	C01142	Lysine degradation(ko00310);;Metabolic pathways(ko01100)	--	--	--	--	--	--	--	HMDB0012114	Organic compounds	Organic acids and derivatives	Carboxylic acids and derivatives	Amino acids, peptides, and analogues	439417	4299-56-3
pos_1675	3-Sulfinato-L-alaninate	2.37744363783643e-06	3.25179782042851e-06	2.47359880321855e-06	2.67678013017315e-06	2.22738708530807e-06	2.22936024867083e-06	2.12369467613576e-06	1.58892366632577e-06	3.09479034665259e-06	1.49324905903285e-06	2.2280171737769e-06	1.65074179546724e-06	-0.3579905713942	0.116827682034753	1.50649050188121	unchanged	C00606	Cysteine and methionine metabolism(ko00270);;Taurine and hypotaurine metabolism(ko00430);;Metabolic pathways(ko01100)	--	--	--	--	--	--	--	HMDB0000996	Organic compounds	Organic acids and derivatives	Carboxylic acids and derivatives	Amino acids, peptides, and analogues	1549098	1115-65-7
pos_1676	Ginsenoyne N	0.00455336917297641	0.00423234147582069	0.00378564900452259	0.0043546032465507	0.003703951013433	0.00403273216633599	0.00484202130750251	0.00439865903996059	0.00540457427028605	0.00484703067662243	0.00485232555865995	0.00442753570163052	0.22280677910743	0.00690168617740647	2.35013744138777	up	--	--	--	--	--	--	--	--	--	--	--	--	--	--	--	--
pos_1677	Isolinderenolide	0.000601507552745697	0.000502270632683005	0.000311707435230691	0.000390632577413616	0.000422819375709939	0.000440870720926479	0.000342761895923309	0.000387205561279824	0.000442379615862584	0.000480291983192327	0.000393481335292569	0.000423768395121964	-0.0907292543401557	0.481478204146974	0.801709045003171	unchanged	--	--	--	--	--	--	--	--	--	--	--	--	--	--	--	--
pos_1678	Retinyl beta-glucuronide	0.00259505628705893	0.00200869499196989	0.00272277037266165	0.00248252757186305	0.00239008605435897	0.00228281277821788	0.0020407739433884	0.0019687490174695	0.00377165027352014	0.00250864961058845	0.00240350856971212	0.0028893461443729	0.0762671601410645	0.549432972036938	0.504603090540622	unchanged	--	--	--	--	--	--	--	--	--	HMDB0010340	Organic compounds	Lipids and lipid-like molecules	Prenol lipids	Terpene glycosides	6440956	_
pos_1679	Oxandrolone	0.000154701973038114	0.000179144084840424	0.000162498498848484	0.000173998486513487	0.000148415600484578	0.000175657608569503	0.000148305006257035	0.000160329562274518	0.000169891187214366	0.000195941432172398	0.000172629777011495	0.000156150243010567	0.0104559086485221	0.866262663625098	0.187522418735809	unchanged	--	--	--	--	--	--	--	--	--	--	--	--	--	--	--	--
pos_168	1,2,3-Trimethylbenzene	0.000190550640218208	0.000231419459599165	0.00020434724361837	0.000207725557289141	0.000175384271417748	0.000194272306153621	0.000192038250146887	0.000209294504265113	0.000205525193680461	0.000207701953229701	0.000202528157514259	0.000193445442489469	0.012636937168292	0.89489881526745	0.216034195744397	unchanged	--	--	--	--	--	--	--	--	--	--	--	--	--	--	--	--
pos_1680	Agavoside B	4.4591580881838e-05	1.8079348089892e-05	1.51709777008543e-05	1.23774071286486e-05	2.60853649265531e-05	2.70862836250048e-05	2.93140251514539e-05	2.21963362237789e-05	1.95299066203794e-05	2.03275646305358e-05	2.0762318912379e-05	1.96709230697185e-05	-0.00331215889107206	0.713531867585341	0.410665281474385	unchanged	--	--	--	--	--	--	--	--	--	--	--	--	--	--	--	--
pos_1682	N2-(3-Carboxy-2-hydroxy-1-oxopropyl)arginine	2.22671967949894e-05	1.07995588050793e-05	9.96085994029507e-06	9.40445888650934e-06	1.3103687928958e-05	1.33327060926436e-05	1.21744174481169e-05	9.70673931416209e-06	1.32180594271931e-05	1.09994696699278e-05	1.16833902759275e-05	1.16283085334943e-05	-0.125606320757495	0.462201298276289	0.86876019387618	unchanged	--	--	--	--	--	--	--	--	--	--	--	--	--	--	--	--
pos_1683	(E,Z)-2,4-Dodecadiene	1.39101369344688e-07	6.42358860183553e-07	3.32000375378446e-07	6.76143441198811e-07	5.7384249154764e-07	6.12619907773862e-07	3.03772001321601e-07	6.38134804412926e-07	5.27099013389315e-07	7.27011343137818e-07	5.36983903840289e-07	3.29642776497084e-07	0.149834486281364	0.898989465339431	0.148508496138706	unchanged	--	--	--	--	--	--	--	--	--	--	--	--	--	--	--	--
pos_1684	PC(14:1(9Z)/22:1(13Z))	0.000187942254127175	9.57895912648183e-05	9.54573529234897e-05	8.37881970874973e-05	0.000103004881969453	0.000108643877830416	0.000111394863164749	0.000103129198244543	9.95144019664621e-05	9.73832374758075e-05	0.000105154847311524	0.000101604695491652	-0.0729927393180247	0.572236047423444	0.69911933400612	unchanged	--	--	LMGP01012133	PC(14:1(9Z)/22:1(13Z))	1-(9Z-tetradecenoyl)-2-(13Z-docosenoyl)-sn-glycero-3-phosphocholine	PC(36:2); PC(14:1_22:1)	Glycerophospholipids [GP]	Glycerophosphocholines [GP01]	Diacylglycerophosphocholines [GP0101]	HMDB0007920	Organic compounds	Lipids and lipid-like molecules	Glycerophospholipids	Glycerophosphocholines	53478629	_
pos_1686	ent-16-Kauren-19-ol	5.32854898021934e-06	5.07211396991826e-06	5.68680025615159e-06	4.76678870174779e-06	4.89957447716534e-06	4.99698372056481e-06	3.71874014091772e-06	4.79386122688191e-06	3.9177818644376e-06	5.7759079185885e-06	4.66911488136348e-06	3.41161419362915e-06	-0.246831363258671	0.0952204714837428	1.84207244459381	unchanged	--	--	--	--	--	--	--	--	--	--	--	--	--	--	--	--
pos_1687	Safflomin A	0.000437731545525791	0.000114628770298697	0.000123793442606082	0.000102612008076234	0.00025228018743299	0.000238796969327646	0.000223339341124301	0.000192577602570266	0.00015085698691146	0.000169345726503481	0.000183365425870375	0.000166726001423726	-0.0321550451390102	0.589990525968348	0.658929643306079	unchanged	--	--	--	--	--	--	--	--	--	HMDB0040677	Organic compounds	Phenylpropanoids and polyketides	Cinnamic acids and derivatives	Hydroxycinnamic acids and derivatives	_	146087-19-6
pos_1688	4-Hydroxy-5-(dihydroxyphenyl)-valeric acid-O-sulphate	2.43891346815227e-06	3.8044157857758e-06	3.43702715315719e-06	3.12283596439653e-06	3.21470006688795e-06	3.29623300898938e-06	2.31074834124647e-06	3.02918566700402e-06	3.58198376207135e-06	3.65484557545162e-06	3.0639560468967e-06	4.12519911377543e-06	0.0223808088083928	0.817335261503663	0.286272956893846	unchanged	--	--	--	--	--	--	--	--	--	--	--	--	--	--	--	--
pos_1689	Dihydrocarvone	0.000113328607360694	7.22194685705657e-05	3.60631308419172e-05	1.5824099079707e-05	3.97395830252954e-05	4.54513255765654e-05	1.18126750348717e-05	1.81660439951603e-05	1.32601589896243e-05	7.63255723457371e-05	2.84470157921794e-05	2.37498069802743e-05	-0.974222906283124	0.176975132249185	1.43018647913988	unchanged	--	--	--	--	--	--	--	--	--	--	--	--	--	--	--	--
pos_169	1,5-Octadien-3-one	0.000119906615485683	0.000116451307149837	8.84149593907544e-06	7.12925741751359e-05	0.000119241974338063	8.96296971051631e-05	5.9508560456319e-06	8.1738278484605e-06	5.50319443792603e-06	8.62031203040669e-05	2.60203497421662e-05	1.18676738753736e-05	-2.28139897388003	0.016933031333629	2.22085377716555	down	--	--	--	--	--	--	--	--	--	--	--	--	--	--	--	--
pos_1691	Auberganol	6.1258975942542e-05	7.38651770359333e-05	0.000104377734811213	8.86089405180926e-05	8.71143687048161e-05	7.93717033113129e-05	7.45984130536873e-05	9.30430829314456e-05	9.02108673189502e-05	8.51473906998125e-05	8.88138837160781e-05	0.000115518771348553	0.153100426595776	0.305607742569117	0.998773660007708	unchanged	--	--	--	--	--	--	--	--	--	--	--	--	--	--	--	--
pos_1692	Muridienin 4	0.000182984915513868	0.000326607329891002	0.000200829066037412	0.000201391512007549	0.000120365080148818	0.000186590120578839	0.000181429132854848	0.000207187604677146	0.000159926942036401	0.000184137930710417	0.000198360433591504	0.000194256009945069	-0.057985862692556	0.604119846697393	0.388014903772135	unchanged	--	--	--	--	--	--	--	--	--	--	--	--	--	--	--	--
pos_1693	Neuromedin C 1-8	6.31972055989501e-05	0.000106161406159333	3.96918083748305e-05	6.88790815217544e-05	8.73076514033346e-05	7.06532950683414e-05	8.89629997357187e-05	5.58802965164961e-05	8.96136341834682e-05	6.3094606849026e-05	7.15463035481279e-05	4.13594405134489e-05	-0.0739910721660735	0.731760405156084	0.2112400347411	unchanged	--	--	--	--	--	--	--	--	--	--	--	--	--	--	--	--
pos_1694	Alkaloid AQC2	1.89349760503542e-05	2.16578386978095e-05	2.17031219490459e-05	2.2326630218398e-05	2.62741575750777e-05	2.64788092924277e-05	1.78123310548742e-05	2.28772607405822e-05	2.15660713620689e-05	2.90596230220805e-05	2.10902941853741e-05	1.99177824000697e-05	-0.0609812440176594	0.679072191529736	0.483074454590999	unchanged	--	--	--	--	--	--	--	--	--	--	--	--	--	--	--	--
pos_1695	Ganglioside GM3 (d18:1/9Z-18:1)	1.97165222729978e-05	2.69008309569543e-05	7.49144555295668e-06	1.25038534481419e-05	1.88684999885434e-05	1.33094382484854e-05	1.70514421616551e-05	1.7306345263887e-05	1.03396743251483e-05	1.41732854488828e-05	1.43930926130949e-05	1.21023252893121e-05	-0.121325560482372	0.480496913937992	0.647719517468164	unchanged	--	--	--	--	--	--	--	--	--	--	--	--	--	--	--	--
pos_1696	Alanyl-Glutamine	5.95306119265903e-07	2.1837075428064e-07	2.05051050762454e-06	1.25693388165942e-08	1.4314947566839e-06	5.8528271930074e-07	8.37985276855478e-09	1.35545632577128e-07	7.09684337742579e-09	3.07128675833908e-06	8.28763233833851e-07	1.30750998154206e-06	-1.11820624229039	0.896649714448716	0.0228226584378523	unchanged	--	--	--	--	--	--	--	--	--	HMDB0028685	Organic compounds	Organic acids and derivatives	Carboxylic acids and derivatives	Amino acids, peptides, and analogues	123935	39537-23-0
pos_1697	Moxifloxacin	0.000239907155797156	0.000256389762174175	0.000247462343200507	0.000216552557877786	0.000222231431596781	0.000251099311097747	0.000173946784047897	0.000230256179991444	0.000285793036643446	0.000199716749806718	0.000234677036624321	0.000278034148713012	-0.0503852103647642	0.791882896906717	0.282212160856718	unchanged	C07663	ABC transporters(ko02010)	--	--	--	--	--	--	--	--	--	--	--	--	--	--
pos_1699	Vaporole	4.82372108923713e-06	5.83657858443786e-06	5.188186654822e-06	5.67058722298253e-06	3.85507325871418e-06	5.17780222293154e-06	4.97105775785184e-06	4.94200981260805e-06	3.99839978333265e-06	4.98981822245919e-06	4.85600069373712e-06	5.46165321853888e-06	-0.0578214981578924	0.540299711424806	0.48949298741659	unchanged	--	--	--	--	--	--	--	--	--	HMDB0001382	Organic compounds	Organic nitrogen compounds	Organonitrogen compounds	Organic nitroso compounds	8053	110-46-3
pos_170	3-tert-Butyl-5-methylcatechol	0.000104892787317473	0.000116527884416833	9.72280796003271e-05	0.000114456048917621	0.000107623206550963	0.000110597291682777	9.13927356322552e-05	0.00010355539564864	0.000112730558342516	0.000100494240704979	0.000111836777785499	0.000126864460914013	-0.0149843872646223	0.900435403383697	0.110287607555127	unchanged	--	--	--	--	--	--	--	--	--	--	--	--	--	--	--	--
pos_1700	Isofucosterol 3-O-[6-O-(9,12-Octadecadienoyl)-b-D-glucopyranoside]	8.55052736769193e-06	1.30675658830625e-06	1.0781186028824e-05	1.29684648062224e-06	1.80500997873465e-06	5.17037831069622e-06	1.38214374655663e-06	4.75445879113451e-06	5.71614490860371e-06	2.31907347823757e-06	2.9800153400283e-06	1.11358534014882e-06	-0.389070082303444	0.364824869782561	1.07873659547434	unchanged	--	--	--	--	--	--	--	--	--	--	--	--	--	--	--	--
pos_1702	Evobioside	0.000218401036935887	0.000215131886060313	0.000547426367213283	0.000423004480919701	0.000152699139260766	0.000297419130424203	0.000201797496683435	0.000178186455521349	0.000476858555883738	0.00047295953284918	0.000300430135384774	0.000211294280544556	0.00985483860503855	0.980290879072146	0.132922951084491	unchanged	--	--	--	--	--	--	--	--	--	--	--	--	--	--	--	--
pos_1703	(6beta,7alpha,12beta,13beta)-7-Hydroxy-11,16-dioxo-8,14-apianadien-22,6-olide	0.000528610235528307	0.000628004292676776	0.000405284541434092	0.00050345981880702	0.000459415776139955	0.000502100002725138	0.000515565207520802	0.00044472571926599	0.000463605794168513	0.000587309474454455	0.000472103222714873	0.000429536886496704	-0.0505985142504919	0.632765691015565	0.382678214987415	unchanged	--	--	--	--	--	--	--	--	--	--	--	--	--	--	--	--
pos_1705	11,14,17-Eicosatrienoic acid	0.000109090506091833	0.000120061956872326	0.000103980389631637	0.000106856693638802	9.8285138009341e-05	9.67741039855449e-05	0.000116940920258706	0.000110746208066976	0.000115769523073113	0.000111626262362691	0.000103581576980053	0.000126921212177519	0.111439709723985	0.102884187464132	1.70378414118599	unchanged	C16522	Biosynthesis of unsaturated fatty acids(ko01040)	LMFA01030159	11,14,17-eicosatrienoic acid	11,14,17-eicosatrienoic acid	11, 14, 17-icosatrienoic acid; C20:3n-3,6,9	Fatty Acyls [FA]	Fatty Acids and Conjugates [FA01]	Unsaturated fatty acids [FA0103]	HMDB0060039	Organic compounds	Lipids and lipid-like molecules	Fatty Acyls	Fatty acids and conjugates	5312529	17046-59-2
pos_1706	Capsianoside V	1.38133233370974e-05	6.51815116112446e-06	7.1586707135576e-06	5.8995446184461e-06	7.05194699730317e-06	8.51653061816629e-06	2.72373844841597e-06	1.43391087439973e-05	2.34323822011468e-05	4.89630080061971e-06	1.47742875805196e-05	3.38194569808675e-05	0.548893273091085	0.179224740990606	1.36713069089264	unchanged	--	--	--	--	--	--	--	--	--	--	--	--	--	--	--	--
pos_1707	Withaphysacarpin	1.75181705053232e-05	3.45639880913016e-06	3.24345650144179e-06	3.68260678371876e-06	1.07336023973126e-05	6.92260415647678e-06	8.74273734922756e-06	5.48056011075394e-06	4.87065629908478e-06	5.94035983644189e-06	5.91860579717586e-06	6.58262454769287e-06	0.00121808979384497	0.5953912016806	0.666348521214595	unchanged	--	--	--	--	--	--	--	--	--	--	--	--	--	--	--	--
pos_1709	SM(d18:1/18:1(11Z))	1.80215762227263e-05	1.12998992373128e-05	3.24019917249736e-06	3.24934219614462e-06	7.39459374326103e-06	2.43670719000913e-06	8.3170423297223e-07	2.02252000986187e-06	6.74515129807414e-06	7.79686902947528e-07	3.01600652147112e-06	0	-5.46143944960011	0.0885211968611349	1.82824877257674	unchanged	C00550	Metabolic pathways(ko01100);;Sphingolipid signaling pathway(ko04071);;Sphingolipid metabolism(ko00600);;Necroptosis(ko04217)	--	--	--	--	--	--	--	HMDB0012100	Organic compounds	Lipids and lipid-like molecules	Sphingolipids	Phosphosphingolipids	53481366	_
pos_171	6-Methyl-3,5-heptadien-2-one	0.00015727986599281	0.000152712851748616	9.02602190435668e-06	7.36182320650965e-05	0.000154594245890527	0.000106074078167348	1.20708137270274e-05	9.95783215804234e-06	6.56725330852377e-06	8.77134152610845e-05	2.62328037146796e-05	1.09637230685815e-05	-2.28032600798234	0.0170028561167941	2.2600951527229	down	--	--	--	--	--	--	--	--	--	--	--	--	--	--	--	--
pos_1711	DG(14:0/22:1(13Z)/0:0)	0.000300152717651202	0.000465469675404944	0.000267053870325292	0.000268055353518002	0.000237519444123103	0.000265985471659474	0.000267364582960366	0.000277248394028891	0.000343434213852087	0.000266910605150075	0.000291489320228667	0.000270030568001878	-0.0400825151606981	0.698216201860465	0.281077995418085	unchanged	--	--	--	--	--	--	--	--	--	HMDB0007029	Organic compounds	Lipids and lipid-like molecules	Glycerolipids	Diradylglycerols	53477964	_
pos_1713	Eicosapentaenoyl Ethanolamide	8.28308384472386e-06	8.21797898361499e-06	7.91367859341036e-06	9.89075632430076e-06	1.78821892721777e-06	8.38387125573093e-06	6.96972886713317e-06	9.81934858903561e-06	5.8688189093146e-06	4.60443360702987e-06	8.01368983508635e-06	9.36809835662936e-06	0.132920959319815	0.984870995639563	0.0860474956525919	unchanged	--	--	--	--	--	--	--	--	--	HMDB0013649	Organic compounds	Organic nitrogen compounds	Organonitrogen compounds	Amines	5283450	109001-03-8
pos_1714	Arachidonic acid	0.000139259416459181	0.00014478183124908	0.000147805661678119	0.00013781714715075	0.000130859305980443	0.000140715246726468	0.000131230049748656	0.000147467977614299	0.000122272856051475	0.000166412727785426	0.000137263917647773	0.000147358391702204	0.0124573108875055	0.797815533518919	0.242508438671955	unchanged	C00219	Ferroptosis(ko04216);;Inflammatory mediator regulation of TRP channels(ko04750);;Linoleic acid metabolism(ko00591);;Ovarian steroidogenesis(ko04913);;Retrograde endocannabinoid signaling(ko04723);;Platelet activation(ko04611);;Fc gamma R-mediated phagocytosis(ko04666);;Arachidonic acid metabolism(ko00590);;Amoebiasis(ko05146);;Necroptosis(ko04217);;Phototransduction - fly(ko04745);;Leishmaniasis(…	LMFA01030001	Arachidonic acid	5Z,8Z,11Z,14Z-eicosatetraenoic acid	5Z,8Z,11Z,14Z-icosatetraenoic acid; AA; Arachidonate; cis-5,8,11,14-Eicosatetraenoic acid; (all-Z)-5,8,11,14-Eicosatetraenoic acid; all-cis-5,8,11,14-Eicosatetraenoic acid	Fatty Acyls [FA]	Fatty Acids and Conjugates [FA01]	Unsaturated fatty acids [FA0103]	--	--	--	--	--	--	--
pos_1715	12-O-D-Glucuronoside-13-hydroxyoctadec-9Z-enoate	1.73473046639594e-05	7.33345067075387e-06	3.2888562741343e-06	1.19170715825092e-05	4.09904386036592e-06	7.54537595893937e-06	1.47500355124676e-05	6.92949419670757e-06	1.64567148033015e-05	3.08477631543283e-06	3.91576430701058e-06	4.2651089497517e-06	-0.13858540232663	0.914496720582522	0.109352346401874	unchanged	--	--	--	--	--	--	--	--	--	--	--	--	--	--	--	--
pos_1716	PE(18:1(11Z)/22:5(4Z,7Z,10Z,13Z,16Z))	3.80248569577814e-05	3.5827792338234e-05	1.896351725351e-05	3.00234487085515e-05	2.51758806320402e-05	4.0931276313577e-05	2.31967294255918e-05	3.11968740110539e-05	2.32444505552389e-05	2.81144095345592e-05	3.20947290309215e-05	3.42440811760526e-05	-0.103479025937732	0.493240714249058	0.626607963435765	unchanged	--	--	--	--	--	--	--	--	--	HMDB0009043	Organic compounds	Lipids and lipid-like molecules	Glycerophospholipids	Glycerophosphoethanolamines	53479641	_
pos_1717	2-Isopropylmalic acid	1.66838670949737e-06	8.79966780141515e-07	2.24200832169205e-07	2.12106263873587e-07	1.37427532440006e-05	4.14360776614945e-06	8.98484851468932e-06	6.44061340869411e-06	2.01936639575558e-07	1.98573839728502e-06	6.26792862606943e-06	8.94955058241274e-06	1.39249374646906	0.463364911371891	0.812531065146611	unchanged	C02504	2-Oxocarboxylic acid metabolism(ko01210);;Biosynthesis of amino acids(ko01230);;Pyruvate metabolism(ko00620);;Metabolic pathways(ko01100);;Valine, leucine and isoleucine biosynthesis(ko00290)	--	--	--	--	--	--	--	HMDB0000402	Organic compounds	Lipids and lipid-like molecules	Fatty Acyls	Fatty acids and conjugates	5280523	49601-06-1
pos_1718	Cascarillin	0.000204151957317787	0.00029308837063977	0.000152719961908959	0.000215160876792639	0.000213914055781569	0.00021259985310358	0.000196869296751499	0.000178417245076463	0.000199845758243052	0.000222494261459411	0.000187205568352583	0.00016747023700492	-0.144796513891645	0.283634599313642	0.988068996218783	unchanged	--	--	--	--	--	--	--	--	--	--	--	--	--	--	--	--
pos_1719	N1,N5,N10-Tris-trans-p-coumaroylspermine	1.02065955258591e-05	1.54922334069978e-05	4.05903592204418e-06	6.1451089625676e-06	1.05197468694688e-05	9.62362677719145e-06	6.28314197221827e-06	1.20006473971978e-05	7.88862864007418e-06	6.97651341861615e-06	9.38554148254921e-06	1.50436248439672e-05	0.0922066706113327	0.906456639599448	0.227381588269931	unchanged	--	--	--	--	--	--	--	--	--	--	--	--	--	--	--	--
pos_172	N-Methyl-2-pyrrolidinone	4.80571804963517e-06	6.57501182818388e-06	4.79334354647363e-06	4.0759749584598e-06	6.47310384576403e-06	5.0600136860702e-06	4.68350431135087e-06	4.79900945552291e-06	6.11354966159747e-06	5.13783025678612e-06	5.17299079707074e-06	5.92733566584872e-06	0.0163924964995594	0.986162143246414	0.0998302583419996	unchanged	--	--	--	--	--	--	--	--	--	HMDB0002039	Organic compounds	Organoheterocyclic compounds	Pyrrolidines	Pyrrolidones	12025	616-45-5
pos_1720	N-arachidonoylglycinate	2.01990518871537e-06	5.27837810689005e-06	4.33462836762712e-06	5.87724486977586e-06	4.84866143431312e-06	3.90289099711463e-06	1.23017882522485e-05	8.21921502245616e-06	7.90830401737774e-06	9.85687455618273e-06	1.02711284390286e-05	9.73017249343252e-06	1.20995387407135	0.000100579690172435	2.98025573847469	up	--	--	--	--	--	--	--	--	--	HMDB0005096	Organic compounds	Organic acids and derivatives	Carboxylic acids and derivatives	Amino acids, peptides, and analogues	5283389	179113-91-8
pos_1721	2-Decarboxybetanin	2.74641391893889e-06	3.06171957188357e-06	1.16573106096352e-06	1.89050128230932e-06	3.22542650478325e-06	2.09032644274083e-06	2.46833646982472e-06	2.59587767055232e-06	1.38330523748287e-06	2.21710088481495e-06	1.46798941475643e-06	3.42252913905054e-06	-0.0566089067927074	0.820756057726161	0.157066146791546	unchanged	--	--	--	--	--	--	--	--	--	--	--	--	--	--	--	--
pos_1722	7-Hydroxy-3,4',8-trimethoxyflavone	0.000723560492164848	0.00138000142104095	0.000575575124328803	0.000680178005887673	0.000845579251113736	0.000773889177834578	0.000636987992786188	0.000673486242598312	0.000837907883930781	0.00109979476295091	0.000816408612057262	0.000778739833701833	-0.00423224968900549	0.870394261146036	0.0709301000576004	unchanged	--	--	--	--	--	--	--	--	--	--	--	--	--	--	--	--
pos_1723	4-cholesten-7α,12α,24-triol-3-one	0.00119387954012124	0.00144539670573145	0.00130432450223398	0.00118667962821314	0.00121437942561365	0.0013385520391035	0.00120801857517681	0.00128655714540516	0.00139000236392995	0.00127272914373688	0.00131393942189509	0.00129081274376345	0.0171834692841646	0.7914704112709	0.447990327588274	unchanged	--	--	--	--	--	--	--	--	--	HMDB0062399	Organic compounds	Lipids and lipid-like molecules	Steroids and steroid derivatives	Bile acids, alcohols and derivatives	24755588	_
pos_1725	2-Hydroxypropyl 2-isopropyl-5-methylcyclohexyl carbonate	2.09278170651115e-05	1.77866347355723e-05	2.066835480451e-05	2.46945626260658e-05	1.54578744515377e-05	2.02795948297334e-05	1.92263613040122e-05	2.26595107887944e-05	2.15424660561936e-05	1.72400436838785e-05	2.07912227634211e-05	2.73997442816518e-05	0.105013862716472	0.447412196697944	0.754005802149539	unchanged	--	--	--	--	--	--	--	--	--	--	--	--	--	--	--	--
pos_1727	Nb-Hexacosanoyltryptamine	9.04821679503414e-05	0.000142778121411443	0.000112798729084826	0.000127622106124926	0.000190946471749622	0.000146829402707336	0.000152345388507972	0.000140437655710937	0.000196360366588521	0.000142739631677436	0.00012862741897866	0.000109139972527181	0.115187435975432	0.609436420346831	0.589372801289854	unchanged	--	--	--	--	--	--	--	--	--	--	--	--	--	--	--	--
pos_1728	Sulfathiazole	3.1253973927457e-05	5.53352825304665e-05	1.73110039783025e-05	2.8660782497949e-05	4.58965045342667e-05	3.16762802406695e-05	2.95474968157812e-05	2.09315669744282e-05	2.41301718757584e-05	2.67104881219098e-05	2.74515183858826e-05	1.60666100073082e-05	-0.471146938603038	0.110550502436128	1.52825667166748	unchanged	--	--	--	--	--	--	--	--	--	--	--	--	--	--	--	--
pos_1729	hydroxyitraconazole	0.000460477975257688	5.46566999187526e-05	7.78775591480883e-05	5.37244571722479e-05	0.000223832341738389	0.000208239074909163	0.000168234704179892	0.000141350675403352	9.72705314080921e-05	0.000121813176400878	0.000139212526585238	0.000109209432930639	-0.0327177801852816	0.472397173971486	0.868969472217698	unchanged	--	--	--	--	--	--	--	--	--	HMDB0061035	Organic compounds	Organoheterocyclic compounds	Diazinanes	Piperazines	108222	_
pos_173	5,7,4'-TRIMETHOXYFLAVONE	8.53458785707154e-06	2.49977325457512e-06	1.32022284439624e-05	2.59903837379596e-05	9.91070185106767e-05	1.58191376894898e-05	3.42252210938672e-05	1.85448817273612e-05	1.44515947007586e-05	5.62217425128206e-06	1.9057286505457e-05	2.61845901671307e-06	-0.359506296808529	0.473026156783007	0.830402548003669	unchanged	--	--	--	--	--	--	--	--	--	HMDB0030842	Organic compounds	Phenylpropanoids and polyketides	oids	O-methylated flavonoids	79730	5631-70-9
pos_1730	Sudachiin A	0.000122160156394738	0.000102783544569331	9.36410999714494e-06	7.72639396614687e-05	4.15910803960001e-05	5.93546909192091e-05	3.93272584337605e-05	1.95271151699511e-05	4.27452819437731e-06	0.000124615243745449	3.13432819544717e-05	6.2556614153961e-06	-1.35453996272369	0.237432760545166	1.2249747921623	unchanged	--	--	--	--	--	--	--	--	--	--	--	--	--	--	--	--
pos_1731	3,4-Hexahydroxydiphenoylarabinose	1.06738798745847e-05	1.15815484150759e-05	1.07143239483805e-05	9.82657753352065e-06	1.02039261541273e-05	1.09521855855982e-05	9.61770666655533e-06	9.92204125044085e-06	1.0798769609046e-05	9.87678543414568e-06	1.08839620731623e-05	1.53210974843675e-05	0.0371033060773733	0.667868677247887	0.547831108615903	unchanged	--	--	--	--	--	--	--	--	--	--	--	--	--	--	--	--
pos_1732	3-Hydroxy-4-butanolide	8.85106409143989e-05	0.000128036017580714	6.96146804107134e-05	7.94749403291091e-05	8.75141557608903e-05	8.69732235554546e-05	8.58117430169648e-05	8.73528381648788e-05	8.87386225983425e-05	0.000121995038848819	9.49381564665335e-05	9.33500667641152e-05	0.0986122449449507	0.600497406369394	0.645490056832835	unchanged	--	--	--	--	--	--	--	--	--	--	--	--	--	--	--	--
pos_1733	(Z)-3-(1-Butenyl)-1H-2-benzopyran-1-one	6.97649604455309e-05	0.000118918054334656	5.87519406523004e-05	8.49032085951869e-05	9.28438994394634e-05	8.11464359093359e-05	8.65408493380565e-05	6.29523550534195e-05	0.00010480390415649	8.11979254758273e-05	8.43292675508575e-05	5.6631503149427e-05	-0.082307601643544	0.661996126882713	0.334956269425129	unchanged	--	--	--	--	--	--	--	--	--	--	--	--	--	--	--	--
pos_1734	Frovatriptan	0.000120289679109441	0.000129352610952777	0.000310030048763818	4.39285279552157e-05	0.000176681802840507	0.000156832984712659	1.94345220119232e-05	0.000120300952077259	4.22464584467693e-05	0.000495184406677385	0.000146619171073995	0.000238236891895102	-0.296860374723193	0.801195362381143	0.18367107857717	unchanged	--	--	--	--	--	--	--	--	--	--	--	--	--	--	--	--
pos_1736	6-beta-Naltrexol	1.76025123661979e-05	1.96745516466281e-05	5.66569396753066e-06	9.89521327108511e-07	4.35777363985879e-06	5.04821930572054e-06	5.12802522900038e-06	4.95758315793548e-06	8.1266861582023e-07	3.7392416590155e-06	3.31778370109317e-06	2.69219919906764e-06	-0.991976568038478	0.147893132848712	1.45852866246601	unchanged	--	--	--	--	--	--	--	--	--	--	--	--	--	--	--	--
pos_1737	PE(20:0/22:5(4Z,7Z,10Z,13Z,16Z))	0.000148593398225745	0.000198570219984799	0.000357885212929226	0.000126700998281548	0.00017790927854759	0.000206813156144413	0.000205867906126906	0.000223593568860273	0.000151475545421543	0.000273486771842719	0.0003120989552192	0.000319114626249863	0.324636334431366	0.320295061466287	1.04085658111989	unchanged	--	--	--	--	--	--	--	--	--	HMDB0009241	Organic compounds	Lipids and lipid-like molecules	Glycerophospholipids	Glycerophosphoethanolamines	53479711	_
pos_1738	Cryptomeridiol 11-rhamnoside	0.000173512513109574	0.000203409072534852	0.000284738366605009	0.000293013189593312	0.000259895521826315	0.000250190939852955	0.000240084336739703	0.000246857247804157	0.000188740840423079	0.000233580017066765	0.000288842804123026	0.000207299292628006	-0.0485743403666419	0.686733912985222	0.468003319356982	unchanged	--	--	--	--	--	--	--	--	--	--	--	--	--	--	--	--
pos_174	3beta-[(Tetrahydro-2H-pyran-2-yl)oxy]androst-5-en-17beta-ol	0.000164009331365679	0.000144877219723187	0.000298506519070849	0.000261869952878053	0.000273669812175889	0.000227016698926071	0.00020316124815276	0.000250192623462344	0.000274112947892093	0.00022741640568434	0.000218409261747057	0.000207745621894746	0.052861175219773	0.948596621080973	0.0884799701264467	unchanged	--	--	--	--	--	--	--	--	--	--	--	--	--	--	--	--
pos_1740	Thiamine monophosphate	0	0	3.10516390444384e-06	0.000136038485298921	0.000110208977249046	4.76574571455428e-05	9.76445807497481e-05	4.74597848214134e-05	0	1.40695424420054e-07	2.78540437800712e-05	1.30679056632118e-06	2.62036474192523	0.503905420296221	0.693892788479524	unchanged	C01081	Thiamine metabolism(ko00730);;Metabolic pathways(ko01100)	--	--	--	--	--	--	--	HMDB0002666	Organic compounds	Organoheterocyclic compounds	Diazines	Pyrimidines and pyrimidine derivatives	1131	495-23-8
pos_1741	SM(d18:0/26:1(17Z))	6.48178100858287e-06	7.87731590058815e-06	2.024447483173e-06	1.23867316745793e-06	1.13833841050177e-06	0	6.38669320173664e-07	2.06274175985181e-06	9.92690932523739e-07	8.1223137889473e-07	0	0	-4.8948548832346	0.134539955955277	1.56919264473093	unchanged	--	--	LMSP03010025	SM(d18:0/26:1(17Z))	N-(17Z-hexacosenoyl)-sphinganine-1-phosphocholine	C26:1DH Sphingomyelin	Sphingolipids [SP]	Phosphosphingolipids [SP03]	Ceramide phosphocholines (sphingomyelins) [SP0301]	--	--	--	--	--	--	--
pos_1742	trans-Zeatin-O-glucoside riboside	1.86134104995092e-05	4.59083070021864e-07	1.12156859930729e-06	2.58307188013838e-07	7.77642650391878e-06	4.82202632601587e-06	3.17684267138322e-06	3.1722653757021e-06	1.5235437927964e-06	4.1305583828196e-06	3.92362274270034e-06	1.59580990581582e-06	0.349471326059362	0.414330910869184	1.0219740046975	unchanged	--	--	--	--	--	--	--	--	--	--	--	--	--	--	--	--
pos_1743	6''-O-(3-Hydroxy-3-methylglutaroyl)astragalin	0.000421483983737816	0.000117269754734374	0.000126901068408755	9.97076822744594e-05	0.000251252286152617	0.00024078451223041	0.000225045432326893	0.00019870752611748	0.000155087160841657	0.000172602395694812	0.000184427367375585	0.000174304974003735	0.00406535773963235	0.649250405110695	0.562256372152995	unchanged	--	--	--	--	--	--	--	--	--	--	--	--	--	--	--	--
pos_1744	N-a-Acetyl-L-arginine	2.0042367151966e-05	1.912729014115e-05	1.38024323060824e-05	1.42244550029976e-05	1.87766807961872e-05	1.6695845563934e-05	1.69860757245339e-05	1.62764597999826e-05	1.7000492216962e-05	1.44482470976156e-05	1.51617883513682e-05	1.59769870502382e-05	-0.0867277848193524	0.360712649497001	0.901974058278514	unchanged	--	--	--	--	--	--	--	--	--	--	--	--	--	--	--	--
pos_1745	Cysteamine	2.05546588562757e-05	2.80757907429807e-05	2.51158392249376e-05	2.88665021749051e-05	2.03449707637331e-05	2.49247296832423e-05	2.14322250279891e-05	2.33661190282197e-05	2.75749458446274e-05	2.29097265853325e-05	2.47261699058407e-05	2.05044600755337e-05	-0.0672568897345283	0.511493305874827	0.641235662859489	unchanged	C01678	Metabolic pathways(ko01100);;Taurine and hypotaurine metabolism(ko00430)	--	--	--	--	--	--	--	--	--	--	--	--	--	--
pos_1746	Streptomycin	1.05578862561435e-05	6.63500953523452e-06	9.44373250376803e-08	4.23725525096492e-06	2.19922765593095e-06	4.79706231050792e-06	1.00266391267448e-06	2.88869275526269e-07	1.00414105924756e-06	1.18349003383332e-05	1.69599212347563e-06	9.74691288409544e-07	-0.949952620286137	0.424685236806688	0.885847395571765	unchanged	C00413	Metabolic pathways(ko01100)	--	--	--	--	--	--	--	--	--	--	--	--	--	--
pos_1748	Murrayenol	0.000739070936396338	0.00116183960014767	0.00264380790903809	0.00159304370610495	0.00079189780045183	0.00130210880700326	0.00144261569257606	0.00202305849884612	0.0016326040923172	0.00116854563934902	0.00187253078554046	0.00274294887137333	0.489832709915026	0.252976088151494	1.17699409931592	unchanged	--	--	--	--	--	--	--	--	--	--	--	--	--	--	--	--
pos_175	estra-5,7,9-triene-3β,17β-diol	0.000127133414608659	0.000158654999248865	0.000233831424325996	0.000191350392439507	0.00023402360994505	0.00018472997143095	0.000126836298690216	0.000131312213104527	0.000200241702171412	0.000197950748655216	0.000154993456927617	0.000167317431364636	-0.198057688838702	0.269759071072133	1.22067310650998	unchanged	--	--	--	--	--	--	--	--	--	--	--	--	--	--	--	--
pos_1750	Bifonazole	1.09978091894438e-05	1.55372567130016e-05	4.75281137310044e-06	5.91540828202743e-05	9.50591314915873e-06	2.18367643650018e-05	1.22732788828335e-05	9.44870080200524e-06	1.24066883509565e-05	1.43293494724698e-05	1.43502418701124e-05	7.86946714491023e-06	-0.349787047408565	0.344643405008454	1.04196409476652	unchanged	--	--	--	--	--	--	--	--	--	HMDB0015583	Organic compounds	Benzenoids	Benzene and substituted derivatives	Diphenylmethanes	2378	60628-96-8
pos_1751	Levonorgestrel	0.000661553157691906	0.000630050072978549	0.000516548445121884	0.000742423425941775	0.000563058366748869	0.000636529605483986	0.000598009439582229	0.000600191089141148	0.00061852607701281	0.000614228629132123	0.000623088866558912	0.000618937185255966	-0.0205917152955983	0.706930527895089	0.429876238090716	unchanged	--	--	--	--	--	--	--	--	--	HMDB0014511	Organic compounds	Lipids and lipid-like molecules	Steroids and steroid derivatives	Estrane steroids	13109	797-63-7
pos_1752	Alpha-Tocotrienol	0.000113989652637459	8.36332072589258e-05	0.000228787805257989	0.000205949191212577	0.000112617429374135	0.000154960946275455	0.000167680094971369	0.000222005564865477	0.000151263216142103	0.000190146395045011	0.000229131317016632	0.000345332814689888	0.572326179153396	0.096938934500714	1.5893005502175	unchanged	C14153	Ubiquinone and other terpenoid-quinone biosynthesis(ko00130);;Metabolic pathways(ko01100)	LMPR02020054	alpha-tocotrienol	2R,5,7,8-tetramethyl-2-[(3E,7E)-4,8,12-trimethyltrideca-3,7,11-trien-1-yl]-3,4-dihydro-2H-chromen-6-ol	alpha-tocotrienol; zeta1-tocopherol	Prenol Lipids [PR]	Quinones and hydroquinones [PR02]	Vitamin E [PR0202]	HMDB0006327	Organic compounds	Lipids and lipid-like molecules	Prenol lipids	Quinone and hydroquinone lipids	5282347	58864-81-6
pos_1753	Isoorientin 2''-[feruloyl-(->6)-glucoside]	4.56874305413289e-06	9.18583571866851e-06	2.84327179556007e-05	1.53087052737516e-05	1.08193359546098e-05	2.50493870940448e-05	1.53342734409507e-05	2.06351207637483e-05	1.81909928563235e-05	1.90795882782787e-05	2.56460038298737e-05	1.31867230480053e-05	0.484548751000043	0.48370950000124	0.764022458019196	unchanged	--	--	--	--	--	--	--	--	--	--	--	--	--	--	--	--
pos_1754	Calendasaponin D	3.19602605331815e-05	3.59250842701231e-05	3.43273145969852e-05	2.72237289541733e-05	3.4475099553468e-05	3.62992743224212e-05	3.03524710854786e-05	4.61372287373914e-05	4.0112370967e-05	3.27035826152421e-05	4.00228058365836e-05	4.00317128071781e-05	0.188703181222271	0.111633756346097	1.59397658852664	unchanged	--	--	--	--	--	--	--	--	--	--	--	--	--	--	--	--
pos_1756	cis-Quinceoxepane	4.70374672663128e-05	6.9594716375232e-05	6.00982870780788e-05	6.72387386424992e-05	5.06933921334488e-05	5.24601934783265e-05	4.14457362299246e-05	5.38558900205773e-05	5.90132631709965e-05	5.2904288192798e-05	6.07183519281036e-05	5.4546993435761e-05	-0.101340248032699	0.402774044379642	0.890487725789746	unchanged	--	--	--	--	--	--	--	--	--	--	--	--	--	--	--	--
pos_1757	3b,18b-3-Methoxy-11-oxo-12-oleanen-30-oic acid	0.000105241495425336	0.000117033464426682	0.000123751346033085	0.000211908483617171	9.8242238940333e-05	0.000142694644671408	0.000137941254083015	0.000141043604190917	9.28968389172717e-05	0.000106585986820096	0.000140750806066574	0.000175853202086324	0.0124287240788821	0.976329822124819	0.0120763561906851	unchanged	--	--	--	--	--	--	--	--	--	--	--	--	--	--	--	--
pos_1759	Imipenem	0.000130551985388323	2.11722959424531e-05	2.31648938132097e-05	3.4897716331555e-05	6.87680769013443e-05	6.96039695665301e-05	6.61931306972448e-05	3.86986719732703e-05	2.70285511924143e-05	4.57454149670718e-05	4.88201874703329e-05	3.87963523228917e-05	-0.139039293171701	0.466700569371609	0.843238289478122	unchanged	--	--	--	--	--	--	--	--	--	--	--	--	--	--	--	--
pos_176	11-Deoxocucurbitacin I	0.000119322834999122	0.000142934495283886	0.000171639029531946	0.000144290531198277	7.26458031238438e-05	0.000128138604692808	8.15383609665462e-05	0.000274872644615187	0.000110640941489071	0.000104680758878439	0.000219111309992251	0.000600404185020769	0.519759782870867	0.260457140123894	1.21854826967606	unchanged	--	--	--	--	--	--	--	--	--	--	--	--	--	--	--	--
pos_1760	3,4-Dicaffeoyl-1,5-quinolactone	0.000120135182165868	3.1269855415353e-05	3.26961512607324e-05	2.38873785772441e-05	6.44334322020317e-05	6.09186349871659e-05	5.63109472083788e-05	5.06099153446408e-05	3.87095732925807e-05	4.14673888753594e-05	4.6352226559145e-05	4.67481916997024e-05	-0.0360615813398226	0.574745876783111	0.683269300678527	unchanged	--	--	--	--	--	--	--	--	--	--	--	--	--	--	--	--
pos_1762	Kaempferol 3-rhamnoside 7-xyloside	7.95496945695739e-06	7.45851955496537e-06	4.97067360893642e-06	4.29911115646937e-06	1.45439763251111e-05	1.05338756974463e-05	7.56400729866278e-06	8.92456278959625e-06	8.09487551359164e-06	4.97150838892401e-06	5.56447009619415e-06	2.34590552457351e-05	0.144733722943158	0.659224586361726	0.539235048281989	unchanged	--	--	--	--	--	--	--	--	--	--	--	--	--	--	--	--
pos_1763	Maysin	1.02259767177147e-05	7.81712782653714e-06	6.08535612786916e-06	6.65926193445824e-06	8.83284695703955e-06	1.01557386802847e-05	8.39573075231249e-06	1.15292204090302e-05	9.08409574175966e-06	8.40621636466778e-06	7.99333995857176e-06	1.08013343938058e-05	0.18916723599115	0.275601265104151	1.13657524359831	unchanged	--	--	LMPK12110512	Maysin	-	-	Polyketides [PK]	Flavonoids [PK12]	Flavones and Flavonols [PK1211]	HMDB0037419	Organic compounds	Phenylpropanoids and polyketides	Flavonoids	Flavonoid glycosides	194340	70255-49-1
pos_1764	(Z)-1,3-Octadiene	2.34567052014201e-05	3.29584618938512e-05	3.66196781243977e-05	3.55868596152083e-05	3.67771965030342e-05	3.17086266847333e-05	3.5414501740554e-05	3.93652513046372e-05	3.41199369491159e-05	3.21597900467577e-05	3.39511193243244e-05	3.79384647407912e-05	0.124326066577265	0.29162134260801	1.13893870719066	unchanged	--	--	--	--	--	--	--	--	--	--	--	--	--	--	--	--
pos_1765	Avocadyne 2-acetate	0.000652544139941165	0.000701288732228615	0.00107062710001758	0.00130053866685194	0.0015239221223317	0.000960376051699276	0.00126205308689085	0.00128277417330579	0.00103589275897658	0.000825980884544365	0.000944342017465196	0.000807306491957894	0.0299017997417543	0.95951382062221	0.108684146786417	unchanged	--	--	--	--	--	--	--	--	--	--	--	--	--	--	--	--
pos_1766	Camelliagenin A	0.00091563116451158	0.00139307750880937	0.00160371587296767	0.0016721149434674	0.00395615752349757	0.0020199557564007	0.00137744831170148	0.00135195741958825	0.005077935702051	0.00119257939560304	0.00244435827368675	0.00177157867469447	0.139539413324485	0.718784179594423	0.321363633921988	unchanged	--	--	--	--	--	--	--	--	--	--	--	--	--	--	--	--
pos_1767	Diphenhydramine N-glucuronide	0.00017822576748854	9.22929767535195e-06	2.16895833397924e-05	1.09838372633736e-05	9.20776557211954e-05	8.83470418727337e-05	7.35067243354207e-05	5.30791607347756e-05	2.57936916498723e-05	5.56448550327602e-05	5.68290887864712e-05	4.49896419985009e-05	0.361194434082604	0.607912945408158	0.628146545775378	unchanged	--	--	--	--	--	--	--	--	--	--	--	--	--	--	--	--
pos_177	Sorbaldehyde	9.29527433516892e-05	9.40567269680116e-05	7.84459323925632e-06	5.58567045964917e-05	9.63911449398946e-05	7.27452671784096e-05	5.84347274634726e-06	8.20323888911842e-06	6.11422266290188e-06	6.93662648711207e-05	2.28107930156945e-05	1.10735785570469e-05	-2.0588011337217	0.018469076305247	2.19487286937673	down	--	--	LMFA06000006	Sorbaldehyde	2,4-hexadienal	Sorbic aldehyde	Fatty Acyls [FA]	Fatty aldehydes [FA06]	-	--	--	--	--	--	--	--
pos_1770	Tetracosapentaenoic acid (24:5n-6)	1.22213565541176e-07	2.23715777754506e-06	1.40623667838907e-06	1.07084689954604e-05	4.82191981642704e-06	3.29404028239673e-06	2.68554004847188e-06	3.79114748749307e-06	6.09589405359998e-06	3.83523135768428e-06	4.84928112242332e-06	4.45156334984099e-06	1.04932537997431	0.757276022907721	0.246049838714954	unchanged	--	--	--	--	--	--	--	--	--	--	--	--	--	--	--	--
pos_1773	Perindopril	2.15864136315186e-05	2.36183277511375e-05	2.57258809102752e-05	2.15362683656342e-05	1.85071623132884e-05	2.13869300909875e-05	1.53355544080098e-05	1.9543131176057e-05	2.34004391618313e-05	2.11572659203152e-05	2.13369338575117e-05	2.15424890952992e-05	-0.118843948048792	0.291164851980804	1.15679497353842	unchanged	--	--	--	--	--	--	--	--	--	--	--	--	--	--	--	--
pos_1774	Furfuryl propyl disulfide	3.69357506256958e-06	6.33661351734882e-06	5.88386263258845e-06	4.1171188469027e-06	3.55907202572199e-06	4.97719640621853e-06	3.69161138043991e-06	3.83134956079861e-06	4.84300915955722e-06	4.35258038064259e-06	4.79979677862768e-06	3.99688419343959e-06	-0.135372652595546	0.358754659484457	0.828322111122563	unchanged	--	--	--	--	--	--	--	--	--	--	--	--	--	--	--	--
pos_1777	Xerocomic acid	9.0932478072819e-05	7.37021277532856e-06	1.28989599626927e-05	1.03931652792132e-05	5.05787587224109e-05	5.05751465918503e-05	3.81001427921116e-05	3.66149570509109e-05	1.4690038309292e-05	1.85565994205018e-05	2.52406759868839e-05	2.42092461701424e-05	0.00264746801925142	0.467492554718657	0.839200816389082	unchanged	--	--	--	--	--	--	--	--	--	--	--	--	--	--	--	--
pos_1778	1,4,6-Trihydroxy-5-methoxy-7-prenylxanthone	7.7565567341005e-07	1.11271980472457e-06	2.43511742405756e-06	1.78361646407776e-05	1.67664592645928e-06	4.85681595418129e-06	4.93657809839184e-06	6.68663503766007e-06	7.7329392330319e-07	1.81711386510647e-06	3.9707835475289e-06	1.28922712222103e-05	0.493249208124034	0.904322926970187	0.12137058605328	unchanged	--	--	--	--	--	--	--	--	--	--	--	--	--	--	--	--
pos_1779	1-(Methylthio)propyl propyl disulfide	3.45624171584128e-05	4.93903849502792e-05	3.35843019762062e-05	3.26759247436176e-05	2.79106884762443e-05	2.77104446519265e-05	3.15365409214896e-05	3.28974215514883e-05	3.5424033523577e-05	2.90601550847732e-05	3.3335976533988e-05	3.2761525272162e-05	-0.0521407772550546	0.611146503027421	0.442571770681339	unchanged	--	--	--	--	--	--	--	--	--	--	--	--	--	--	--	--
pos_178	Gibberellin A15	0.000335286039018982	0.000385460469870052	0.000743329172578542	0.000104297563290553	0.000427657609532506	0.000400157379128532	4.31511252653077e-05	0.000277758621299484	9.8086556152395e-05	0.000862693748722429	0.000392855441378666	0.000623827029424629	-0.464380587970039	0.91783035605272	0.172165776843207	unchanged	--	--	LMPR0104170017	Gibberellin A15	-	-	Prenol Lipids [PR]	Isoprenoids [PR01]	C20 isoprenoids (diterpenes) [PR0104]	--	--	--	--	--	--	--
pos_1781	1-Caffeoyl-5-feruloylquinic acid	2.9021360726673e-05	3.29876639221123e-05	7.5777366337567e-07	2.15489884073793e-05	2.86815025615071e-05	2.10782468048016e-05	5.82606866402045e-06	2.63788816008932e-06	3.46742107997454e-06	2.43405496352548e-05	8.17103702515063e-06	2.67110300241194e-06	-1.39716716562842	0.0340602332448421	2.01153763752939	down	--	--	--	--	--	--	--	--	--	--	--	--	--	--	--	--
pos_1782	PS(DiMe(11,5)/MonoMe(11,5))	2.44273669189824e-05	8.26636080585226e-06	6.24928729423117e-06	8.03818541394759e-06	1.46919023410909e-05	1.43686527299744e-05	1.56013634668346e-05	1.05083324624279e-05	1.01758758165614e-05	1.06784708043204e-05	1.20451541881197e-05	9.69331353673275e-06	-0.0069825591505186	0.687067385050488	0.474160524965425	unchanged	--	--	--	--	--	--	--	--	--	--	--	--	--	--	--	--
pos_1783	Farnesyl pyrophosphate	0.000279038533354788	4.85598159836186e-05	3.83641578176847e-05	3.11866272568979e-05	0.000128811357768203	0.000118444148482162	0.000105552879951898	8.17071782631454e-05	5.92095244190923e-05	6.44547135769943e-05	6.91592821456209e-05	6.30209955801619e-05	-0.130989586322087	0.426350740486555	0.929862626605885	unchanged	C00448	Metabolic pathways(ko01100);;Steroid biosynthesis(ko00100);;Terpenoid backbone biosynthesis(ko00900);;Insect hormone biosynthesis(ko00981)	LMPR0103010002	Farnesyl diphosphate	Farnesyl pyrophosphate	-	Prenol Lipids [PR]	Isoprenoids [PR01]	C15 isoprenoids (sesquiterpenes) [PR0103]	--	--	--	--	--	--	--
pos_1787	Calenduloside E	0.00100526683187332	0.000614086804970598	0.000530234195210695	0.000525245654618866	0.000553186864046073	0.000640476078125512	0.000609372885423717	0.000597960540329256	0.000610007789450364	0.000542606022091618	0.000582330593401447	0.000600874396306345	-0.0882454388138232	0.502388372973827	0.781564831932067	unchanged	--	--	LMPR0106150003	oleanolic acid 3-O-beta-D-glucosiduronic acid	28-hydroxy-28-oxoolean-12-en-3beta-yl beta-D-glucopyranosiduronic acid	3-O-(beta-D-Glucopyranuronosyl)oleanolic acid; Calenduloside E; Glycoside St-E; Momordin Ib; Oleanoic acid 3-O-glucuronide; Polysciasaponin P7; Silphioside F; oleanolic acid 3-O-glucuronide	Prenol Lipids [PR]	Isoprenoids [PR01]	C30 isoprenoids (triterpenes) [PR0106]	--	--	--	--	--	--	--
pos_1788	lysoPC(26:0)	0.00276752128088893	0.00079194193092646	0.000789141225298231	0.000735544519799722	0.00121735626887987	0.00116575246078691	0.00140404577113039	0.0010371732859331	0.000940978896031397	0.000940983745232361	0.00102835197846709	0.00104308579782491	-0.0640664990216244	0.602624478254681	0.644017419529833	unchanged	--	--	--	--	--	--	--	--	--	--	--	--	--	--	--	--
pos_1789	Ganoderic acid Mi	0.00173670135870755	0.000546292776914039	0.000488564306150751	0.000490462242661713	0.000769601965354044	0.000758376929346838	0.000946319078359371	0.000703707371337925	0.000638595151243396	0.000685746160597184	0.000726256196144979	0.000714235387738719	0.0315144201132718	0.765603923615365	0.400092169683507	unchanged	--	--	--	--	--	--	--	--	--	--	--	--	--	--	--	--
pos_179	Cyclokievitone	1.46855057528133e-05	0	2.16488550951972e-05	1.99033731753148e-05	5.09720963919988e-06	1.31947987202626e-05	7.0312011372502e-06	8.31964487240326e-06	2.38723064616179e-06	7.49853684292155e-06	6.69786683141053e-06	1.26755452778363e-05	3.33494946399959	0.222087215564672	1.38411416546025	unchanged	--	--	LMPK12050493	Cyclokievitone	-	-	Polyketides [PK]	Flavonoids [PK12]	Isoflavonoids [PK1205]	--	--	--	--	--	--	--
pos_1790	DG(20:3(5Z,8Z,11Z)/22:2(13Z,16Z)/0:0)	1.16236010142847e-05	4.89618952298011e-06	2.60841888241088e-06	2.49495247989789e-06	0	1.23891014815486e-06	2.7070604712863e-06	9.06237348942013e-07	9.58325823605224e-07	1.20090390511309e-06	3.02329591633743e-06	1.31577411844522e-06	2.8193986436476	0.271824008766614	1.23585159209058	unchanged	--	--	--	--	--	--	--	--	--	HMDB0007465	Organic compounds	Lipids and lipid-like molecules	Glycerolipids	Diradylglycerols	53478260	_
pos_1791	6-Sinapoylglucoraphenin	0.000122434348692279	1.99928171829801e-06	1.01497427155545e-05	4.70201675256348e-06	5.27613460114432e-05	3.74033102108925e-05	2.75416216063363e-05	2.16373586567615e-05	9.48272546839042e-06	9.94522035992775e-06	1.81971444047242e-05	1.21799116608959e-05	-0.148021606971852	0.301121023960286	1.22146063540797	unchanged	--	--	--	--	--	--	--	--	--	--	--	--	--	--	--	--
pos_1792	2-Hydroxypentyl glucosinolate	1.81567274537633e-06	2.46844927263787e-06	3.69342081991291e-06	2.81234109167332e-06	2.28739998560167e-06	2.1492514289354e-06	1.25346876885529e-06	2.17377511684007e-06	3.20214857970551e-06	1.45968110268748e-06	2.27234711719208e-06	2.05243808246008e-06	-0.324339534144109	0.255199202384851	1.25111093113193	unchanged	--	--	--	--	--	--	--	--	--	--	--	--	--	--	--	--
pos_1793	Acetaminophen cystein	2.27775417458567e-05	1.26956796700991e-05	1.16629284254545e-05	1.2048956312164e-05	1.86132207791146e-05	1.89937338336005e-05	1.86918617781086e-05	1.8703175661326e-05	1.601087965719e-05	1.68294611248557e-05	1.47368169611882e-05	1.86911607220098e-05	0.142146163853608	0.588604537061535	0.56352599913117	unchanged	--	--	--	--	--	--	--	--	--	--	--	--	--	--	--	--
pos_1794	5-O-a-L-Arabinofuranosyl-L-arabinose	0.000501287318757429	0.000900538154465287	0.000359428672995427	0.000437299164873043	0.00055529719494412	0.000517474639481919	0.000421398192939336	0.000426830983992844	0.000556658408579359	0.000673585033163359	0.000515841223995247	0.000476055141424907	-0.0499903885910449	0.70678595027636	0.288103127795056	unchanged	--	--	--	--	--	--	--	--	--	--	--	--	--	--	--	--
pos_1795	PI(16:0/16:1(9Z))	0.000418816485934457	0.000227843116370226	0.000202863056074225	0.000207981192812023	0.000229724197844223	0.000248416480630155	0.000247448646251824	0.000231205655864724	0.000227048133760822	0.000217691502014069	0.00022532144693185	0.000229773566736774	-0.108365896353007	0.46871302365435	0.860470844740382	unchanged	--	--	LMGP06010881	PI(16:0/16:1(9Z))	1-hexadecanoyl-2-(9Z-hexadecenoyl)-glycero-3-phospho-(1'-myo-inositol)	PI(32:1); PI(16:0_16:1)	Glycerophospholipids [GP]	Glycerophosphoinositols [GP06]	Diacylglycerophosphoinositols [GP0601]	HMDB0009779	Organic compounds	Lipids and lipid-like molecules	Glycerophospholipids	Glycerophosphoinositols	_	_
pos_1796	Ganglioside GA2 (d18:1/24:1(15Z))	0.00226004631086865	0.000988975842833614	0.00155640539628691	0.0014578220095188	0.00206272619273655	0.00188678680629111	0.00193269732428273	0.00161043605617688	0.00180586055358262	0.00161813789600939	0.00174263572632141	0.00171647482642371	0.0771553548147654	0.86141634670856	0.0782722410146631	unchanged	--	--	--	--	--	--	--	--	--	--	--	--	--	--	--	--
pos_1797	(R)-2-Amino-N-(2,2,4,4-tetramethyl-3-thietanyl)propanamide	4.79099202650126e-05	4.07098365451548e-05	2.57609693052612e-05	3.47611516921107e-05	4.21563152961804e-05	4.07252808984417e-05	4.38598177148665e-05	3.47917751362522e-05	3.99146223323496e-05	4.01945676709413e-05	3.49951792975117e-05	4.86103884225934e-05	0.0789911395286076	0.659060481718825	0.552748269643414	unchanged	--	--	--	--	--	--	--	--	--	--	--	--	--	--	--	--
pos_1798	Malformin	6.44030748863139e-06	9.0182961545723e-06	1.01352202366171e-05	9.53337405349974e-06	6.8851790412444e-06	7.3981329413254e-06	6.47934049515573e-06	7.40769495709745e-06	8.41225100887304e-06	6.88073914220843e-06	8.1590851641134e-06	7.8472066077226e-06	-0.114069765383036	0.343182832127972	1.00636945330541	unchanged	--	--	--	--	--	--	--	--	--	--	--	--	--	--	--	--
pos_1799	Arjunolic acid	1.02623627347179e-05	1.39533912637114e-05	1.52789566634557e-05	1.21660489791269e-05	9.15061692391124e-06	1.20997001342599e-05	9.50003609602716e-06	1.05041220189331e-05	1.51376179095604e-05	1.04813763579049e-05	1.23675757693311e-05	1.18931584500344e-05	-0.0566126986629101	0.691262886479199	0.379757016984424	unchanged	--	--	LMPR0106150023	Arjunolic acid	(2alpha,3beta,4alpha)-2,3,23-Trihydroxy-olean-12-en-28-oic acid	-	Prenol Lipids [PR]	Isoprenoids [PR01]	C30 isoprenoids (triterpenes) [PR0106]	HMDB0034502	Organic compounds	Lipids and lipid-like molecules	Prenol lipids	Triterpenoids	5320146	465-00-9
pos_18	L-Homocystine	2.5059674096117e-05	2.05771464551447e-05	1.80556187279243e-05	1.91580165072646e-05	2.03206416157462e-05	2.15534316956841e-05	2.14695059927134e-05	1.9903341274391e-05	2.45399453072706e-05	1.62800226911684e-05	1.96545347958101e-05	7.85363457708559e-05	0.292347813864021	0.386761893799969	0.986584491789411	unchanged	C01817	Cysteine and methionine metabolism(ko00270)	--	--	--	--	--	--	--	--	--	--	--	--	--	--
pos_180	2,4,7-tridecatrienal	0.000261051009976637	0.00031433141842704	0.000279295327645306	0.000312505839364568	0.000261179775814943	0.000288235682776544	0.000256180956054207	0.000283062440105652	0.000338701576292874	0.000291223465759997	0.000301560696604535	0.000281326843284253	0.0284225920825829	0.697647625212858	0.406228817241552	unchanged	--	--	LMFA06000076	2,4,7-tridecatrienal	2,4,7-tridecatrienal	-	Fatty Acyls [FA]	Fatty aldehydes [FA06]	-	--	--	--	--	--	--	--
pos_1800	LysoSM(d18:0)	9.16700377712325e-06	4.98131910286795e-05	9.06538699226857e-06	7.4361812844962e-06	8.63058449462806e-06	1.63035336499094e-05	8.06769388220034e-07	1.07901083051023e-06	5.10595017161661e-06	9.2823968137827e-06	1.64649293625618e-06	4.96204566475225e-07	-2.82856502201151	0.0993506513054422	1.55629832349451	unchanged	--	--	--	--	--	--	--	--	--	HMDB0012082	Organic compounds	Lipids and lipid-like molecules	Sphingolipids	Phosphosphingolipids	44260122	_
pos_1801	Pokeberrygenin	1.24617112695528e-05	1.44298784094535e-05	1.33738038861187e-05	1.11627227549141e-05	1.22382946755805e-05	1.21689827657182e-05	1.26873850463375e-05	1.33764992444398e-05	1.49696321101888e-05	1.12042122794441e-05	1.31336686168575e-05	1.03556832573645e-05	-0.00773387431647166	0.982779016760126	0.0215988497024086	unchanged	--	--	--	--	--	--	--	--	--	--	--	--	--	--	--	--
pos_1802	1,2-Dehydro-alpha-cyperone	6.94972447461493e-05	7.40682498338968e-05	6.15983431038904e-05	8.23755492019107e-05	5.87583835812377e-05	7.39054590596905e-05	6.84223773398651e-05	7.22541206864015e-05	6.64314314972537e-05	6.73076799593883e-05	7.38807187909402e-05	6.7697432078476e-05	-0.00615169223848966	0.858507381045709	0.127241274473393	unchanged	--	--	--	--	--	--	--	--	--	--	--	--	--	--	--	--
pos_1803	N,2,3-Trimethyl-2-(1-methylethyl)butanamide	7.3423072928433e-05	7.55052064226236e-05	7.12373025757671e-05	7.16127022804521e-05	6.40831991854902e-05	6.78436261148825e-05	4.20768710541711e-05	5.68277208343466e-05	8.81443552623008e-05	7.76926881431378e-05	6.79957019786151e-05	7.05107427117208e-05	-0.10787692473728	0.634506290890332	0.642855307302461	unchanged	--	--	LMFA08020189	N,2,3-Trimethyl-2-(1-methylethyl)butanamide	N,2,3-trimethyl-2-(propan-2-yl)butanamide	-	Fatty Acyls [FA]	Fatty amides [FA08]	N-acyl amines [FA0802]	--	--	--	--	--	--	--
pos_1805	Withaperuvin H	5.21293201883158e-05	0.000101521593578776	8.56623636499869e-05	4.95876009278504e-05	6.23936379023866e-05	5.02566900795618e-05	9.63016895922865e-05	9.44177201633733e-05	4.61965526108461e-05	5.02089581889148e-05	8.21834736525927e-05	9.50306239019724e-05	0.204070715307468	0.439171499666208	0.964850696147245	unchanged	--	--	--	--	--	--	--	--	--	--	--	--	--	--	--	--
pos_1806	PC(22:5(4Z,7Z,10Z,13Z,16Z)/24:1(15Z))	0.000385184996734078	0.000205491738336921	0.000191353502412688	0.000176211655272923	0.000199023448920674	0.000217081361684951	0.000213846347513485	0.000201724522861855	0.000210450664504938	0.000194113281129144	0.000209030980710837	0.000193628631024685	-0.115500805207297	0.46378945417795	0.883748163170625	unchanged	C00157	Glycerophospholipid metabolism(ko00564);;Metabolic pathways(ko01100);;alpha-Linolenic acid metabolism(ko00592);;Choline metabolism in cancer(ko05231);;Retrograde endocannabinoid signaling(ko04723);;Arachidonic acid metabolism(ko00590);;Linoleic acid metabolism(ko00591)	--	--	--	--	--	--	--	HMDB0008684	Organic compounds	Lipids and lipid-like molecules	Glycerophospholipids	Glycerophosphocholines	53479331	_
pos_1808	GDP-alpha-D-mannose(2-)	0.000242167546551452	4.06366632505115e-05	4.14686479909091e-05	2.7176086751944e-05	0.000133725997690077	0.000117093150902544	0.0001049441200001	8.70235082674327e-05	5.31203500542044e-05	7.25938140987641e-05	8.13939101896643e-05	7.29389995668773e-05	0.0446349971015412	0.552932631373741	0.713399294180549	unchanged	--	--	--	--	--	--	--	--	--	--	--	--	--	--	--	--
pos_1809	Lyciumoside IX	4.43782497711469e-05	5.52205019654041e-05	4.76637679553783e-05	6.54054825990044e-05	4.11367622080833e-05	4.93062433354302e-05	4.60872186660768e-05	3.84363191846255e-05	6.78072144921744e-05	6.94340682468809e-05	4.97265770749784e-05	3.30134975581554e-05	-0.0297612410588091	0.974662424928464	0.0155393008750149	unchanged	--	--	--	--	--	--	--	--	--	--	--	--	--	--	--	--
pos_181	1-Nitronaphthalene	3.93122394914488e-05	6.37941569541106e-05	3.57057377315358e-05	3.99270560785498e-05	6.1392676665506e-05	3.93033270347627e-05	2.57183798920808e-05	3.17361112643395e-05	4.82750469101071e-05	1.92047066357992e-05	3.34101140680352e-05	4.2058865642878e-05	-0.503380987443435	0.0781696435163158	1.66885976759704	unchanged	C14040	Metabolism of xenobiotics by cytochrome P450(ko00980)	--	--	--	--	--	--	--	--	--	--	--	--	--	--
pos_1810	Deoxyadenosine monophosphate	7.62779449984339e-07	8.06509462893727e-07	4.27300177008652e-05	6.07743470926873e-06	1.0559898066231e-06	6.78169024184288e-06	1.85787338865426e-05	1.40879254433435e-05	2.98327363235206e-06	3.07778497463131e-07	8.50461097608078e-06	1.46552803337834e-05	0.785073262551276	0.984160707892456	0.0513208670786493	unchanged	C00360	Metabolic pathways(ko01100);;Purine metabolism(ko00230)	--	--	--	--	--	--	--	--	--	--	--	--	--	--
pos_1811	4-O-Caffeoyl-3-O-feruloylquinic acid	1.18181996675146e-05	2.10541909219676e-05	6.60702972406035e-06	1.01498042014873e-05	1.41728211770825e-05	1.12909311316777e-05	1.15038979731332e-05	9.4450218817416e-06	1.44504346442182e-05	1.65676694248015e-05	1.28705445944625e-05	1.02182552559822e-05	0.0595865982139934	0.997889201083583	0.0920255295236927	unchanged	--	--	--	--	--	--	--	--	--	--	--	--	--	--	--	--
pos_1812	Isoxanthohumol	6.31761511484638e-05	5.44026583913967e-05	1.64536333754164e-05	3.78082352215316e-05	3.95302860565324e-05	4.37797159486178e-05	3.02245251531555e-05	2.32644487894956e-05	3.04316996001323e-05	6.56323039502375e-05	3.43995704570414e-05	2.55070269047271e-05	-0.264378655504391	0.422782661488901	0.85444045062744	unchanged	--	--	--	--	--	--	--	--	--	--	--	--	--	--	--	--
pos_1813	Feruperine	5.72454957552116e-06	3.26604857169769e-05	1.3117135371083e-05	1.96728752545129e-05	6.95758463153017e-05	2.64126778551546e-05	8.38261298123941e-05	6.00295303725122e-05	6.22585069152787e-06	1.91904013730521e-05	4.23860619805084e-05	1.38767754862767e-05	0.332634083708248	0.542123666273593	0.7500473186413	unchanged	--	--	--	--	--	--	--	--	--	--	--	--	--	--	--	--
pos_1814	(S)-4',5,7-Trihydroxy-6-prenylflavanone	7.97114844209501e-06	5.29944600299884e-06	0	4.06620153865435e-06	1.62208016224712e-06	2.20523172335332e-06	1.21168733167241e-06	0	0	8.16029984253256e-06	2.87034654307352e-07	0	-8.71597997901175	0.303496716210732	1.11936903210126	unchanged	--	--	--	--	--	--	--	--	--	--	--	--	--	--	--	--
pos_1815	Fluvoxamine	8.92844746332223e-05	4.50319038111495e-05	0.00018279665348197	0.000183718003816828	2.95633812354508e-05	8.33381299334042e-05	2.63016318488782e-05	0.000192617534421654	0.000122591986113484	2.84615227774906e-05	0.000173233576750277	0.000464466733626295	0.349340239694836	0.389030321785494	0.865830306449251	unchanged	--	--	--	--	--	--	--	--	--	--	--	--	--	--	--	--
pos_1817	3,4-Dihydroxymandelic acid	1.40676863905235e-05	2.21521206751895e-05	4.38401597277128e-05	1.68856597627503e-05	1.16663428921606e-05	2.29299507863105e-05	3.00014578994418e-05	3.10066145562298e-05	1.71223757155686e-05	1.2919630997126e-05	2.39867140172656e-05	3.45785278214677e-05	0.244616869338401	0.620283311107281	0.635776514630164	unchanged	C05580	Metabolic pathways(ko01100);;Tyrosine metabolism(ko00350)	--	--	--	--	--	--	--	--	--	--	--	--	--	--
pos_1819	PS(14:0/18:3(9Z,12Z,15Z))	5.12902784984379e-06	5.58367665666403e-06	4.43077800120981e-05	1.63724977987577e-05	1.08445866270275e-05	8.48429036378211e-05	1.89498700718786e-05	2.97049131060438e-05	4.7146383592421e-05	6.21645734533185e-05	2.40267206198694e-05	1.80857377810863e-05	0.871495555373409	0.718820297824192	0.458204365327583	unchanged	--	--	LMGP03010926	PS(14:0/18:3(9Z,12Z,15Z))	1-tetradecanoyl-2-(9Z,12Z,15Z-octadecatrienoyl)-glycero-3-phosphoserine	PS(32:3); PS(14:0_18:3)	Glycerophospholipids [GP]	Glycerophosphoserines [GP03]	Diacylglycerophosphoserines [GP0301]	HMDB0012337	Organic compounds	Lipids and lipid-like molecules	Glycerophospholipids	Glycerophosphoserines	52926033	_
pos_1820	Edulisin I	0.000293776266539317	0.000261108258228178	0.000102898963993551	0.000304810735446982	0.000233921772395635	0.000241912534329992	0.000208691657446914	0.000138510136732917	8.86960650881635e-05	0.000133518097459212	0.000131180981887268	9.46055752621127e-05	-0.833687047784428	0.0141360014653515	2.23549160664019	down	--	--	--	--	--	--	--	--	--	--	--	--	--	--	--	--
pos_1821	D-1-[(3-Carboxypropyl)amino]-1-deoxyfructose	3.39416661547027e-05	5.62682486984017e-05	4.23137676962804e-05	1.06169848002743e-05	1.6463528590477e-05	2.94157510420876e-05	7.25947193899308e-06	1.44540750761969e-05	1.50468338750919e-05	1.10903338585928e-05	1.31978608859946e-05	2.38204541273966e-05	-1.03967692745825	0.0520165224514694	1.85842010497333	unchanged	--	--	--	--	--	--	--	--	--	--	--	--	--	--	--	--
pos_1822	cis-p-Menthane-1,7,8-triol	7.96652387019884e-05	9.70267358950815e-05	8.54200149830693e-05	0.000165207142377339	0.00038181674351964	8.85681205374321e-05	8.64777972966203e-05	8.78406218262906e-05	9.10284578752133e-05	8.38960951768116e-05	8.84991011762871e-05	9.06770755890402e-05	-0.497694492155711	0.257677711212202	1.31401505980005	unchanged	--	--	--	--	--	--	--	--	--	--	--	--	--	--	--	--
pos_1823	Elatoside D	1.44816853046485e-05	2.82334730359694e-05	2.84172494842616e-05	1.17468221179745e-05	2.41309253237203e-05	1.5193994501868e-05	4.31246151748593e-05	3.37855165508547e-05	1.46950874602359e-05	2.59563886615813e-05	2.01261951896895e-05	2.035720121594e-05	0.364315968191672	0.28368532085606	1.24349205082496	unchanged	--	--	--	--	--	--	--	--	--	--	--	--	--	--	--	--
pos_1826	(3beta,5alpha,9alpha,14alpha,22E,24R)-3,5,9,14-Tetrahydroxyergosta-7,22-dien-6-one	0.000375349016531848	0.000221309157888244	5.6569959462156e-05	0.000206591709431079	0.000245856230292932	0.000234145884860547	0.000162585610680252	0.000177212093914633	0.000213261647170761	0.000248661172828877	0.00017857964339544	0.000184387448396526	-0.0252697219914193	0.527457080569867	0.758425478106747	unchanged	--	--	--	--	--	--	--	--	--	--	--	--	--	--	--	--
pos_1829	(+)-Myrtenyl formate	5.29996927882098e-05	6.19213453831317e-05	5.96877064709682e-05	5.75165517189185e-05	5.40245833311757e-05	5.58579442010288e-05	6.61816488802401e-05	6.12967800149565e-05	6.63289120257442e-05	5.73661574059156e-05	6.18162964604773e-05	5.24794233737961e-05	0.0931015043631618	0.165833625848835	1.51458130915202	unchanged	--	--	--	--	--	--	--	--	--	--	--	--	--	--	--	--
pos_183	Oleoyl 3-carbacyclic Phosphatidic Acid	0.000209487815180613	0.000208923617902992	0.000200666247742172	0.000262102787907193	0.000179110533652231	0.000209613131616949	0.000199256224383812	0.000199101214225797	0.000202704330948903	0.000185616111629341	0.000217518864892113	0.000226584446202372	-0.038722809488128	0.62122448583518	0.529432226771828	unchanged	--	--	--	--	--	--	--	--	--	--	--	--	--	--	--	--
pos_1830	3a,4b,12a-Trihydroxy-5b-cholanoic acid	0.000880769040229019	0.00106462527190413	0.00104216894900294	0.00187446539094871	0.00162243467843926	0.00136526858066136	0.00159236038565578	0.00145565643752487	0.000885659808400376	0.000968553005545629	0.00122780988914734	0.000894931948343417	-0.148848934310958	0.507614492488023	0.661244731215024	unchanged	--	--	--	--	--	--	--	--	--	--	--	--	--	--	--	--
pos_1831	Cycloalliin	3.2649805806983e-06	5.03352416599201e-06	5.23068747360298e-06	3.89157064663828e-06	1.86191362072863e-06	3.50011161257519e-06	3.29015414159718e-06	4.19888271682618e-06	4.63786592189737e-06	2.77886957619795e-06	4.41515252952794e-06	3.97283302105025e-06	0.0864279827307257	0.887731472400749	0.213912955598995	unchanged	--	--	--	--	--	--	--	--	--	HMDB0029417	Organic compounds	Phenylpropanoids and polyketides	Flavonoids	Flavonoid glycosides	3549960	455-41-4
pos_1832	TG(20:0/a-13:0/8:0)	0.00050808026209082	0.000127920664697351	0.000133359215381043	0.000109712733953596	0.000297363345055639	0.000291433332294566	0.000259367486948867	0.00022444273124541	0.000167181041063151	0.000191393761602523	0.000210251631997905	0.000194339433143153	-0.0191252072382149	0.589263696173802	0.64709851938067	unchanged	--	--	--	--	--	--	--	--	--	HMDB0062962	Organic compounds	Lipids and lipid-like molecules	Glycerolipids	Triradylcglycerols	131770637	_
pos_1833	PC(22:5(4Z,7Z,10Z,13Z,16Z)/22:6(4Z,7Z,10Z,13Z,16Z,19Z))	4.57768659351666e-05	3.54200402164468e-05	2.28822135078201e-05	1.45656315496084e-05	1.77280417822524e-05	1.53670280439253e-05	1.6613017082694e-05	1.22990768183517e-05	1.48719286962278e-05	8.95333046315138e-06	1.33626234625021e-05	1.69128485358349e-05	-0.763595934276514	0.0776721348709657	1.83675550902825	unchanged	C00157	Linoleic acid metabolism(ko00591);;Arachidonic acid metabolism(ko00590);;Metabolic pathways(ko01100);;Glycerophospholipid metabolism(ko00564);;Retrograde endocannabinoid signaling(ko04723);;Choline metabolism in cancer(ko05231);;alpha-Linolenic acid metabolism(ko00592)	--	--	--	--	--	--	--	HMDB0008682	Organic compounds	Lipids and lipid-like molecules	Glycerophospholipids	Glycerophosphocholines	53479327	_
pos_1834	(Z,Z)-2,9,16-Heptadecatriene-4,6-diyn-8-ol	2.64768517463062e-06	6.25310223604237e-06	3.4404814179057e-07	3.76702358034263e-06	1.01149832115804e-05	5.11569007523731e-06	3.41886783988525e-07	7.31359577874189e-07	3.30834818012272e-07	6.07781045097487e-07	4.1644510230494e-07	3.76551337480178e-07	-2.85059922792063	0.0266710528319278	2.23279958692099	down	--	--	--	--	--	--	--	--	--	--	--	--	--	--	--	--
pos_1835	Calcidiol	2.51535704549311e-05	2.63232688925491e-05	3.62129539431437e-05	5.19042773729954e-05	3.91335754994398e-05	3.61216095551689e-05	2.74558701475993e-05	2.88560342356184e-05	3.1676019848187e-05	2.85895636406529e-05	3.05586799567012e-05	3.42200894490071e-05	-0.204906194379921	0.225231740800055	1.36417438745773	unchanged	C01561	Parathyroid hormone synthesis, secretion and action(ko04928);;Metabolic pathways(ko01100);;Steroid biosynthesis(ko00100);;Tuberculosis(ko05152)	--	--	--	--	--	--	--	HMDB0003550	Organic compounds	Lipids and lipid-like molecules	Steroids and steroid derivatives	Vitamin D and derivatives	5283731	19356-17-3
pos_1836	Achyranthoside C	3.20457939447881e-05	3.88756741274461e-05	3.52851613270342e-05	0.00020113064978134	2.30018630560856e-05	2.9142222482522e-05	1.11900094690031e-05	7.10074829563466e-05	0.000183607047098556	4.83897669372865e-05	0.000206297084862995	0.000135733166855599	0.843299963343199	0.27324426584918	0.991631702390029	unchanged	--	--	--	--	--	--	--	--	--	HMDB0031024	Organic compounds	Lipids and lipid-like molecules	Prenol lipids	Terpene glycosides	78172884	168111-48-6
pos_1837	5,8-Dihydroxy-3-(4-hydroxybenzyl)-7-methoxy-4-chromanone	8.66413325229808e-06	1.22270326948571e-05	1.71316835786575e-05	1.03157062605716e-05	8.0594063418319e-06	1.18846850857517e-05	1.18259017482657e-05	1.10751447789398e-05	1.19616374908309e-05	1.10691972615474e-05	1.29367669447655e-05	9.3077401090876e-06	0.036610142251817	0.990473619748434	0.0653604537563064	unchanged	--	--	--	--	--	--	--	--	--	--	--	--	--	--	--	--
pos_1838	LysoPC(P-18:1(9Z))	0.000219076987837851	0.000118719522161429	0.000110821579474404	9.43258947899731e-05	0.000111273660569086	0.000116465936873307	0.00011650868068699	0.000113397848866988	0.000115886153382838	0.000107210330936086	0.000114426456602728	0.000111576610825224	-0.124923636426573	0.446310315549673	0.918770055647662	unchanged	--	--	--	--	--	--	--	--	--	--	--	--	--	--	--	--
pos_1840	3-hydroxynonanoyl carnitine	4.01773069758105e-06	2.30725640191827e-06	2.87783483191556e-06	1.81502185936671e-06	4.26788161376076e-06	2.51349680601565e-06	2.56800271779896e-06	2.46851323683173e-06	2.05445566649193e-06	4.20125839127579e-06	2.02503150533961e-06	2.79526878529403e-06	-0.124324622815809	0.598046144425259	0.688602377688933	unchanged	--	--	--	--	--	--	--	--	--	--	--	--	--	--	--	--
pos_1842	Sinigrin	2.21432395844564e-05	1.06702192937112e-05	8.34902446820339e-06	2.14363994591658e-06	1.81171183413774e-06	1.08859272837227e-05	1.89021792065968e-07	1.13532727934514e-05	1.63739987330864e-06	1.54979197464912e-06	7.36815361932153e-06	2.57406045726595e-05	-1.05588486890726	0.79096909074166	0.276706334576739	unchanged	--	--	--	--	--	--	--	--	--	HMDB0034070	Organic compounds	Organic oxygen compounds	Organooxygen compounds	Carbohydrates and carbohydrate conjugates	6911854	534-69-0
pos_1843	Ceforanide	4.22964510294169e-05	5.25493629615794e-06	5.48686405123823e-06	4.48744799518083e-06	2.12678035242103e-05	1.83244679028179e-05	1.87760424050133e-05	1.56910248798796e-05	1.11201167038703e-05	1.31906186550595e-05	1.47764532728295e-05	1.08913563313027e-05	0.28420923330291	0.743478123699688	0.446089649587327	unchanged	--	--	--	--	--	--	--	--	--	--	--	--	--	--	--	--
pos_1844	Vitamin K1	4.75534372355787e-05	8.51019687260532e-05	0.000275359716003577	1.42103319834188e-05	2.36331340806615e-05	7.54562444120095e-05	2.76546945854469e-05	1.7308716180676e-05	2.90238347949456e-05	9.7792605550552e-05	3.18378679725374e-05	5.484068101831e-06	-1.14922174642963	0.255912746561248	1.1978255664631	unchanged	C02059	Ubiquinone and other terpenoid-quinone biosynthesis(ko00130);;Metabolic pathways(ko01100);;Vitamin digestion and absorption(ko04977)	LMPR02030028	phylloquinone	2-methyl-3-[(2E,7R,11R)-3,7,11,15-tetramethylhexadec-2-en-1-yl]naphthalene-1,4-dione	2-Methyl-3-phytyl-1,4-naphthoquinone; PHYLLOQUINONE; Phylloquinone; Phytonadione; Vitamin K1	Prenol Lipids [PR]	Quinones and hydroquinones [PR02]	Vitamin K [PR0203]	HMDB0003555	Organic compounds	Lipids and lipid-like molecules	Prenol lipids	Quinone and hydroquinone lipids	5284607	84-80-0
pos_1846	YGM 1B	8.65292108336615e-06	9.39914737414905e-06	8.03196264611969e-06	9.46095229737463e-06	8.88633069375188e-06	9.93853587531579e-06	9.17940182173547e-06	9.88094851798314e-06	1.08884927133192e-05	9.36457591678983e-06	1.07421114692693e-05	6.6423905843958e-06	0.0456379468966475	0.590555510815886	0.561489948350825	unchanged	--	--	--	--	--	--	--	--	--	--	--	--	--	--	--	--
pos_1847	1-(s-glutathionyl)-2,4-dinitrobenzene	2.48770295543089e-06	4.65141340178657e-06	3.50555198984895e-06	5.32087233800263e-06	3.59607618662845e-06	2.360190042434e-06	2.35807700407698e-06	2.12543587387192e-06	4.38028076702811e-06	2.68643438116944e-06	2.17915068375752e-06	3.73533849508442e-06	-0.322003996879452	0.252938851340195	1.18204141984281	unchanged	--	--	--	--	--	--	--	--	--	--	--	--	--	--	--	--
pos_1848	2,3-Dihydro-6-methyl-5-(5-methyl-2-furanyl)-1H-pyrrolizine	0.00045642889853701	0.000237330003857737	0.000213398238886033	0.000207571654112803	0.000298273534707146	0.000306949638217472	0.000332698344978805	0.000280624589015913	0.000262865492297255	0.000279370120252115	0.000275590472635206	0.000344430996801579	0.0945032178359426	0.826075893789684	0.213297787655445	unchanged	--	--	--	--	--	--	--	--	--	--	--	--	--	--	--	--
pos_1849	Phytosphingosine-1-P	8.07793583503549e-06	1.26003435124141e-05	3.73798915093088e-05	4.55679484892008e-05	2.0191087701515e-05	2.24202226763921e-05	1.16690790132747e-05	1.9947000615495e-05	6.62883778362147e-05	2.88967850880732e-05	2.91536988213633e-05	2.797759324207e-05	0.368692594858796	0.531169928407824	0.535979871301183	unchanged	--	--	--	--	--	--	--	--	--	--	--	--	--	--	--	--
pos_185	Ala Gly Pro Pro	0.00064373954121452	0.000315545584513917	0.000214277476444738	0.0002390688098436	0.000444891344226715	0.000423845788879487	0.000508576216767506	0.000384181467096169	0.000307084251457447	0.00035531993575325	0.000366841992884954	0.000337974722648386	0.0716425153724227	0.961424230880959	0.0455483475509934	unchanged	--	--	--	--	--	--	--	--	--	--	--	--	--	--	--	--
pos_1850	Armillane	1.04705033960149e-05	1.01489850135547e-05	8.82654668607301e-06	1.81259604747405e-05	7.08275685417249e-06	1.05482961252467e-05	7.75108333072887e-06	1.17598857437999e-05	9.51153336073506e-06	7.15725551598737e-06	9.90340235868403e-06	2.15318758601406e-05	0.00983411748037355	0.883043340214726	0.150712992888543	unchanged	--	--	--	--	--	--	--	--	--	--	--	--	--	--	--	--
pos_1851	Calendulaglycoside E	0.000132822540850954	0.000148270299055897	0.000147156947091601	0.000144231827536965	0.000124382819968874	0.000157924283989786	0.000129999555720575	0.000148144097950403	0.000153008966162701	0.000130415001790724	0.000144258234959912	0.000140479249979975	-0.0127084179967465	0.824740689653924	0.118141570270994	unchanged	--	--	--	--	--	--	--	--	--	--	--	--	--	--	--	--
pos_1852	PE(20:4(8Z,11Z,14Z,17Z)/P-18:0)	0.000348419551016475	0.000484160568568865	0.000749238937629108	0.000286552803508835	0.000354901179914772	0.000419755899958163	0.000398409710625293	0.000441828083380145	0.000313350365621672	0.000527364655848045	0.000627066713707547	0.000534674310649874	0.142348127479348	0.693125568436532	0.431845962565867	unchanged	--	--	--	--	--	--	--	--	--	--	--	--	--	--	--	--
pos_1853	Scillipheosidin 3-[glucosyl-(1->2)-rhamnoside]	1.90961921195889e-05	2.30898844166812e-05	2.65985683510646e-05	9.05991186210647e-06	1.18574120574159e-05	1.50671975320074e-05	8.40743874852833e-06	1.40489944380899e-05	6.51696906743386e-06	3.12511041656452e-05	2.01246883759551e-05	1.80423143656985e-05	-0.186654585520429	0.821590152183748	0.279706792610533	unchanged	--	--	--	--	--	--	--	--	--	--	--	--	--	--	--	--
pos_1855	Trihexosylceramide (d18:1/20:0)	5.11299896581051e-06	1.04392103619159e-05	1.86298810762523e-05	4.48820615235947e-05	0.000116155780070843	9.34153303326884e-05	1.29941849011675e-05	9.69744227236938e-06	0.00014418193024676	1.34126875042269e-05	7.7054992247146e-05	1.40789426193632e-05	-0.145545576803057	0.924219140000913	0.128010516250475	unchanged	--	--	--	--	--	--	--	--	--	--	--	--	--	--	--	--
pos_1856	Irbesartan	0.000238543959102406	0.000252549670350144	0.000201369907420874	0.000185897259181561	0.000175250161613544	0.000204244268074264	0.000231861562041354	0.000232384991348686	0.000210949506964022	0.000188952089138042	0.000206889615463226	0.000184299975882561	0.00345476424610958	0.978079526593321	0.100120715971689	unchanged	--	--	--	--	--	--	--	--	--	--	--	--	--	--	--	--
pos_1857	DG(18:4(6Z,9Z,12Z,15Z)/22:2(13Z,16Z)/0:0)	0.000207241032433704	1.91728127179022e-05	1.60481104108214e-05	1.06989384326274e-05	0.000286548118717452	0.000106611725781386	0.000440589993149029	0.000337675903058598	9.7349183604498e-05	0.00028077190391138	0.000269232889687937	0.000241362338933146	2.27169475512538	0.0279818605634281	2.04862668358881	up	--	--	--	--	--	--	--	--	--	HMDB0007349	Organic compounds	Lipids and lipid-like molecules	Glycerolipids	Diradylglycerols	53478178	_
pos_1859	Rhamnazin 3-rutinoside	0.000532816607614986	0.000137802050249471	0.000146580377165243	0.00011905315023161	0.000308843925864103	0.000303483992491548	0.000278530361629373	0.000243935419697271	0.000185418526834008	0.000207049766843209	0.000232837033365943	0.00020991619945318	0.0143663868087227	0.649882754382462	0.558665981687465	unchanged	--	--	LMPK12112634	Rhamnazin 3-rutinoside	-	-	Polyketides [PK]	Flavonoids [PK12]	Flavones and Flavonols [PK1211]	--	--	--	--	--	--	--
pos_186	4-[5]-ladderane-butanoic acid	0.000249903670483553	0.0003291033527194	0.000316805583261269	0.0002672664616519	0.000234287594227188	0.000272871991009683	0.000251248727081232	0.000293123479153476	0.000266099786300316	0.000285103163744463	0.000291257094476047	0.000273925889420618	0.000310128273225629	0.926949666327275	0.0157345777578472	unchanged	--	--	LMFA01140011	4-[5]-ladderane-butanoic acid	4-[5]-ladderane-butanoic acid	-	Fatty Acyls [FA]	Fatty Acids and Conjugates [FA01]	Carbocyclic fatty acids [FA0114]	--	--	--	--	--	--	--
pos_1860	dGDP	5.36194776305766e-06	9.59947985395949e-06	8.21079980613258e-06	6.30663737391549e-06	3.76773739213682e-06	6.67982246669361e-06	5.56944669359989e-06	5.19487600988901e-06	6.14839577525948e-06	4.70848474358245e-06	5.74903842035625e-06	4.40890537639447e-06	-0.27662965276313	0.174828902705667	1.25885581256086	unchanged	C00361	Purine metabolism(ko00230);;Metabolic pathways(ko01100)	--	--	--	--	--	--	--	--	--	--	--	--	--	--
pos_1861	DG(20:4(5Z,8Z,11Z,14Z)/22:1(13Z)/0:0)	1.91343086496616e-05	1.58963837871072e-05	3.92105184237952e-06	1.9927297555419e-06	3.60979011439667e-06	3.09993471116805e-06	5.10480013278946e-06	4.77580828205097e-06	2.19311903681972e-06	1.97813556556714e-06	2.08182361169291e-06	1.23450433978481e-06	-1.1020585974476	0.16368805124225	1.4557645051053	unchanged	--	--	--	--	--	--	--	--	--	HMDB0007522	Organic compounds	Lipids and lipid-like molecules	Glycerolipids	Diradylglycerols	9543910	_
pos_1862	Ganglioside GA2 (d18:1/9Z-18:1)	0.000195685648717073	0.000115280054291874	0.000111975710103413	9.94459823802204e-05	0.00012463692319795	0.000137238802980992	0.000152082456062925	0.000136267743164824	0.00015008577301288	0.000120539980208193	0.000117928206878564	0.000140903826509261	0.0893241264753364	0.723983323259852	0.357527335050766	unchanged	--	--	--	--	--	--	--	--	--	--	--	--	--	--	--	--
pos_1863	1-hexadecyl-glycero-3-phosphate	4.36797697104276e-05	4.94213275830597e-05	7.93597909097052e-05	3.95943898380715e-05	3.98482286667636e-05	5.13414756187831e-05	3.37179585462918e-05	4.52252285564801e-05	3.75497433399768e-05	8.31620588674587e-05	4.62060941584418e-05	5.17439796004807e-05	-0.0475993266595527	0.922694373395294	0.158250416635905	unchanged	--	--	LMGP10060005	PA(O-16:0/0:0)	1-hexadecyl-glycero-3-phosphate	PA(O-16:0); PA(O-16:0_0:0)	Glycerophospholipids [GP]	Glycerophosphates [GP10]	Monoalkylglycerophosphates [GP1006]	--	--	--	--	--	--	--
pos_1864	Notoginsenoside H	0.000477851443701027	0.000292116754349483	0.000287848421160282	0.000262013726027366	0.00029247581345377	0.000332341130110216	0.000337392064467322	0.000324297898022127	0.000323359637407932	0.000295850628928937	0.000308112283681169	0.000297290257072991	-0.0156597467046016	0.777874135733417	0.365431715774353	unchanged	--	--	--	--	--	--	--	--	--	--	--	--	--	--	--	--
pos_1865	PC(18:1(9Z)/18:1(9Z))	1.74251640526998e-05	4.30335723769222e-06	7.24375830260851e-05	6.83924884790294e-05	0.000189939649822443	6.74116426341473e-05	5.86976414825567e-05	3.45202913937273e-05	0.000103227014331044	6.70504966670438e-05	7.36960862036011e-05	6.04933197411385e-05	0.619392947067301	0.899982198885168	0.236251116121964	unchanged	--	--	LMGP01010890	PC(18:1(9Z)/18:1(9Z))	1,2-di-(9Z-octadecenoyl)-sn-glycero-3-phosphocholine	Dioleoyl phosphatidylcholine; DOPC; Choline phosphate, 3-ester with L-1,2-diolein;Olein, 1,2-di-, L-, dihydrogen phosphate, monoester with choline hydroxide; 1,2-Dioleoyl-L-alpha-lecithin; 1,2-dioleoyl-sn-glycero-3-phosphocholine; PC(18:1/18:1); PC(36:2); PC(18:1/18:1)	Glycerophospholipids [GP]	Glycerophosphocholines [GP01]	Diacylglycerophosphocholines [GP0101]	HMDB0000593	Organic compounds	Lipids and lipid-like molecules	Glycerophospholipids	Glycerophosphocholines	10350317	4235-95-4
pos_1866	Betavulgaroside II	3.48805519089673e-05	7.36515745014983e-06	8.58274188024672e-06	3.51491826280872e-06	1.24038208235677e-05	1.44031629532757e-05	2.82425675287365e-06	5.65700513800528e-06	3.20677413021196e-06	2.9531056483882e-06	8.08796722486222e-06	5.79598025086132e-06	-1.26815470904103	0.112788781817459	1.76881647271194	unchanged	--	--	--	--	--	--	--	--	--	--	--	--	--	--	--	--
pos_1868	16-Ketoestradiol	0.000169407912439368	9.17935869360749e-05	3.28116853793894e-05	8.13076425328247e-05	3.13708816441336e-05	7.4638936097628e-05	4.54578118789696e-05	4.13982214541523e-05	4.61003280706009e-05	0.000205342119397906	7.62087253477864e-05	4.8671607652025e-05	-0.0926515908409904	0.929479830908769	0.192078447935603	unchanged	--	--	LMST02010047	16-Ketoestradiol	-	-	Sterol Lipids [ST]	Steroids [ST02]	C18 steroids (estrogens) and derivatives [ST0201]	--	--	--	--	--	--	--
pos_187	2-Hydroxyhomopterocarpin	3.4978166851647e-05	1.76177127601099e-05	2.59090717553542e-05	1.53408116321071e-06	1.52575685264162e-05	1.39391178041244e-05	2.11893756682834e-07	6.43075667347016e-06	1.00520447467019e-06	4.81004718336389e-05	9.2403979987654e-06	2.72738989053438e-05	-1.38222409919653	0.760268879523668	0.42176505911631	unchanged	--	--	LMPK12070065	2-Hydroxyhomopterocarpin	-	-	Polyketides [PK]	Flavonoids [PK12]	Pterocarpans [PK1207]	--	--	--	--	--	--	--
pos_1872	Vulgaxanthin I	0.000122898251414371	0.000154331308628527	0.000136456291763261	0.000133277857875635	0.000127381631771754	0.000138924162621536	0.000117959128973294	0.000125259534281989	0.000156307068957504	0.000109776439741095	0.000134962612325546	0.000142424888348292	-0.0541509895745911	0.604570848891251	0.429488868884317	unchanged	--	--	--	--	--	--	--	--	--	--	--	--	--	--	--	--
pos_1873	(E)-2-(2,4-Hexadiynylidene)-1,6-dioxaspiro[4.5]dec-3-ene	5.37056926179794e-05	3.38183559650815e-05	6.5089136020914e-06	2.91189895098786e-05	4.08540143258882e-05	2.85592028570444e-05	1.19121087403973e-05	8.63384731051796e-06	1.01018745243659e-05	3.93587871638971e-05	1.37538366960678e-05	8.96939489082515e-06	-1.05250571188477	0.0666073902706588	1.86820280892243	unchanged	--	--	--	--	--	--	--	--	--	--	--	--	--	--	--	--
pos_1874	Sulfametopyrazine	3.84874219146559e-05	2.98795644263889e-05	1.68230319433694e-05	2.31391146064446e-05	2.29437073957809e-05	3.35272376636528e-05	3.32330072672231e-05	2.31313664949635e-05	1.95991335248957e-05	2.9589022535689e-05	2.53374185079077e-05	3.91024085339217e-05	0.0598494278749691	0.846702064707424	0.348277866050385	unchanged	--	--	--	--	--	--	--	--	--	HMDB0014802	Organic compounds	Benzenoids	Benzene and substituted derivatives	Benzenesulfonamides	9047	152-47-6
pos_1875	Kuwanon Q	0.000321769494594104	4.55394591818622e-05	3.99310694778268e-05	4.07728842991283e-05	0.000153477667063586	0.000148276061902861	0.000114247278352166	8.39405257136697e-05	4.41084486017371e-05	7.23045491770086e-05	8.04452018521303e-05	6.88633088734392e-05	-0.280004411335472	0.343724732770233	1.08611858770195	unchanged	--	--	--	--	--	--	--	--	--	--	--	--	--	--	--	--
pos_1876	PGP(16:0/18:1(11Z))	1.51914396233899e-05	8.84029485166375e-06	2.18277155739451e-05	1.78499448690112e-05	2.46919725145635e-06	1.20402017821468e-05	9.32890528082435e-06	8.53743634395508e-06	6.28904353379302e-06	3.56313439779402e-06	1.15408746058953e-05	8.07690802173327e-06	-0.53751098179232	0.134443495473768	1.58372020136564	unchanged	--	--	LMGP05010002	PGP(16:0/18:1(11Z))	1-hexadecanoyl-2-(11Z-octadecenoyl)-sn-glycero-3-phospho-(1'-sn-glycerol-3'-phosphate)	PGP(16:0/18:1); PGP(34:1); PGP(16:0_18:1)	Glycerophospholipids [GP]	Glycerophosphoglycerophosphates [GP05]	Diacylglycerophosphoglycerophosphates [GP0501]	HMDB0013475	Organic compounds	Lipids and lipid-like molecules	Glycerophospholipids	Glycerophosphoglycerophosphates	9547136	_
pos_1877	Albigenic acid	4.19735032777377e-05	3.84090468112887e-05	2.19137536897679e-05	3.75527428666188e-05	2.96926505206843e-05	3.22957082162594e-05	6.11479702723905e-05	5.67899374111139e-05	3.54110472094531e-05	6.57971778770263e-05	4.73116385046316e-05	6.00754296054173e-05	0.696001172561459	0.00445502646584551	2.53716829604791	up	--	--	--	--	--	--	--	--	--	--	--	--	--	--	--	--
pos_1878	(±)-Rollipyrrole	2.79921133933176e-06	2.64195719880272e-06	1.49592524057624e-06	1.1630285569869e-06	6.40538748190744e-06	2.16521993632177e-06	2.10830993248764e-05	1.06088306992744e-05	1.20814007541974e-06	1.09936800026234e-05	1.58349182974329e-05	7.70444353794624e-06	1.83132929629747	0.0274018692974361	2.28202398133804	up	--	--	--	--	--	--	--	--	--	--	--	--	--	--	--	--
pos_1879	4-Hydroxy-16,18-tritriacontanedione	1.18822384149492e-05	2.45160549810586e-05	1.99056614388159e-05	2.14489787316075e-05	1.46604925081418e-05	1.90429023459422e-05	2.05340990150392e-05	1.6368358705574e-05	2.09686258269192e-05	2.53028507636978e-05	2.46609552221435e-05	2.40307595272882e-05	0.267627715753369	0.177476236577599	1.4947769975447	unchanged	--	--	--	--	--	--	--	--	--	--	--	--	--	--	--	--
pos_188	Dihydroactinidiolide	5.02243212753483e-05	8.57321255893612e-05	0.000128866015966484	0.000113169510207808	8.1872590999019e-05	9.26379843735886e-05	6.50443652376988e-05	8.81511729233323e-05	7.21410860377687e-05	6.45535509640268e-05	8.04772941601401e-05	0.000109711442949573	-0.169079084727073	0.383284688175364	0.884411268782756	unchanged	--	--	--	--	--	--	--	--	--	--	--	--	--	--	--	--
pos_1880	MG(0:0/22:4(7Z,10Z,13Z,16Z)/0:0)	0.000300382686781557	0.000351333638397156	0.000335808214146301	0.000424817173192034	0.000356708664632436	0.000354916456006169	0.000351550840764704	0.000330765053852649	0.000382194403070598	0.000331866015108443	0.000315657609215568	0.000234473050345133	-0.134019726439604	0.286096399266444	1.09751335649505	unchanged	--	--	--	--	--	--	--	--	--	--	--	--	--	--	--	--
pos_1881	Cryptochrome	0.0146605944639966	0.0196004426935957	0.0147763987766176	0.0170699912854881	0.0130739883438543	0.0170806006182452	0.0141215871450358	0.0163151220223048	0.0189226233069434	0.0151526120308055	0.0166762294377603	0.012708989570621	-0.0348686324784389	0.767673840635221	0.228741706562865	unchanged	--	--	--	--	--	--	--	--	--	HMDB0029857	Organic compounds	Lipids and lipid-like molecules	Prenol lipids	Tetraterpenoids	131750919	73745-06-9
pos_1882	Trigofoenoside E1	0.000600385099403999	0.000613447060791648	0.000613722141896291	0.000378178675627813	0.00052815791301476	0.000603263612760782	0.000302368622407031	0.000552285504631489	0.000849166638828303	0.00037684714950454	0.000569490568498356	0.000916967952098008	0.00584242575921934	0.733089904756023	0.363979103360062	unchanged	--	--	--	--	--	--	--	--	--	--	--	--	--	--	--	--
pos_1883	3-Ethyl-5-methyl-1,2-cyclopentanedione	7.10283099679514e-06	7.85031714985735e-06	7.32404934443545e-06	6.92374781121181e-06	6.10549485097133e-06	6.72893045230431e-06	6.62403303344139e-06	6.63318818753565e-06	7.92065944733279e-06	6.40004069848746e-06	6.31140065179e-06	6.15569353722852e-06	-0.0708049427336874	0.370452459597778	0.87335653416172	unchanged	--	--	--	--	--	--	--	--	--	--	--	--	--	--	--	--
pos_1884	Punicacortein A	0.000145339029515776	1.40209311263639e-05	1.58916567909615e-05	1.1033769308921e-05	7.91556201108646e-05	5.40564881099323e-05	5.60910655539934e-05	3.97421439750373e-05	2.04563411825201e-05	2.98100644303512e-05	3.01666840903204e-05	3.65177212592981e-05	-0.00499101486140496	0.453395921547775	0.890262351414278	unchanged	--	--	--	--	--	--	--	--	--	--	--	--	--	--	--	--
pos_1885	Clindamycin	6.1967426161066e-06	9.09721323088739e-06	5.48110285369143e-06	8.25355837979242e-06	7.15969631700574e-06	6.34345642189667e-06	9.45251022014605e-06	6.98958141751179e-06	7.89574530565825e-06	5.81967851394129e-06	6.55453635948191e-06	5.73226634176144e-06	-0.00367781025402181	0.985864946267343	0.151927175743372	unchanged	--	--	--	--	--	--	--	--	--	--	--	--	--	--	--	--
pos_1887	Mesoridazine	4.9550189732132e-05	7.98154300433005e-05	5.11860923515612e-05	4.65369378386832e-05	5.60982961821115e-05	4.9949659542925e-05	8.56447392562329e-05	7.42307517431072e-05	4.58884276753859e-05	5.09832152626698e-05	6.78811868076883e-05	5.91536720364751e-05	0.196315941476133	0.310511671774122	1.24572977116921	unchanged	--	--	--	--	--	--	--	--	--	--	--	--	--	--	--	--
pos_1888	Garcilivin A	3.01386712666339e-05	5.40038178010607e-05	4.78373524626097e-05	4.07208032761835e-05	3.5364194032039e-05	4.52829074759436e-05	3.61276211745353e-05	4.4888303341361e-05	5.69258942153764e-05	4.22672931571562e-05	4.18842280787776e-05	3.91414093765988e-05	0.0555557725789573	0.781058155742249	0.397006426620952	unchanged	--	--	--	--	--	--	--	--	--	--	--	--	--	--	--	--
pos_1889	14,17-epoxy-15-methyldocosa-14,16-dienoic acid	0.000133799114460643	0.000192550682729663	0.000174744564697065	0.000153356147810821	0.000136427020189274	0.000157880714294325	0.000157484000505971	0.000156488232008712	0.000178473767624696	0.000150818917145546	0.000144398243084318	0.000147716268628443	-0.0119556605902549	0.836791559983037	0.0360746022881789	unchanged	--	--	--	--	--	--	--	--	--	HMDB0061648	Organic compounds	Lipids and lipid-like molecules	Fatty Acyls	Fatty acids and conjugates	71443943	57818-42-5
pos_189	His Glu Phe	6.02527411205878e-05	0.000191717232958813	0.000138603443740746	3.58150164075961e-05	1.34149303000417e-05	8.47721333403703e-05	3.45505899078211e-05	3.61713476141253e-05	2.37802965140885e-05	0.000136440383239046	5.06090222973678e-05	3.67845727214878e-05	-0.518466967960071	0.3154333656453	0.924637119748907	unchanged	--	--	--	--	--	--	--	--	--	--	--	--	--	--	--	--
pos_1891	PC(18:1(11Z)/22:5(4Z,7Z,10Z,13Z,16Z))	0.000279503929559622	0.000105102869113957	9.68991924865246e-05	9.17019414097382e-05	0.000129593595841726	0.000132596651952638	0.000150593835817696	0.000124516143924237	0.000112783601138514	0.000115424855369849	0.000122264269026927	0.000120778604176657	-0.0525692684265682	0.633893529712287	0.594629871736473	unchanged	--	--	--	--	--	--	--	--	--	HMDB0008088	Organic compounds	Lipids and lipid-like molecules	Glycerophospholipids	Glycerophosphocholines	53478751	_
pos_1892	Cyclomammeisin	1.27824179754574e-05	1.20502880933244e-05	2.22714960691813e-05	6.64729764461047e-06	4.4540443394335e-05	2.01646237064945e-05	4.19098357006188e-05	3.48563195236227e-05	1.23743473636353e-05	3.97914996106718e-05	3.1915986322656e-05	3.30955921979514e-05	0.868871832228569	0.102526608066692	1.62547639428743	unchanged	--	--	--	--	--	--	--	--	--	--	--	--	--	--	--	--
pos_1893	Ethambutol	2.62662318812692e-05	3.19623384376055e-05	2.9609456919924e-05	2.65341701097922e-05	2.35820136609035e-05	2.6581858896287e-05	2.50257181257686e-05	2.55141154817294e-05	2.95510427657528e-05	2.52517048892366e-05	2.68552428403513e-05	2.41607022457286e-05	-0.0699095822437794	0.366770991090777	0.85260948894677	unchanged	--	--	--	--	--	--	--	--	--	--	--	--	--	--	--	--
pos_1894	Spirolide E	0.00271842813609266	0.00317422551682698	0.00238131815377766	0.00298835816244602	0.00235411601952061	0.0024139222719569	0.00212992903861921	0.00219841098038403	0.00273402001687506	0.00222939130271802	0.00252620170869663	0.00228296407589385	-0.180672879131777	0.093572854735106	1.66718596899305	unchanged	--	--	--	--	--	--	--	--	--	--	--	--	--	--	--	--
pos_1895	Nilutamide	9.20638121374917e-07	1.77092920985009e-06	4.29691165464405e-06	1.80472277674227e-06	1.36859838490032e-06	2.3345174884994e-06	2.19373599677917e-06	2.06263854088426e-06	2.09121532420964e-06	1.96196238791097e-06	2.65850130128806e-06	1.48358111761689e-06	0.143017231988612	0.988760808196114	0.0203685654064067	unchanged	--	--	--	--	--	--	--	--	--	--	--	--	--	--	--	--
pos_1896	Glycyl-glycine	5.70509514790489e-06	2.080286302458e-05	1.0014141656536e-06	8.65496524987746e-07	2.79272530432352e-06	4.7725883584028e-06	0	1.46376495364347e-06	0	3.03101046567287e-06	1.87841296235361e-06	1.04183849458684e-06	-8.64010780850782	0.183591629621366	1.26116395140727	unchanged	--	--	--	--	--	--	--	--	--	HMDB0011733	Organic compounds	Organic acids and derivatives	Carboxylic acids and derivatives	Amino acids, peptides, and analogues	11163	556-50-3
pos_1897	Cyclopassifloic acid E	3.38499430355422e-05	5.45126039171563e-06	2.3242123993819e-05	0.000304749959923254	3.20029896290795e-06	6.77758547840616e-05	2.46007615857704e-05	3.66596476083036e-05	5.66897629908805e-06	1.41668732791946e-05	2.83203343616589e-05	6.0810608257061e-05	-0.197403740272751	0.392325055497698	0.978818578058841	unchanged	--	--	--	--	--	--	--	--	--	--	--	--	--	--	--	--
pos_1898	PS(18:0/20:0)	5.642284929301e-05	8.62067304939466e-05	0.000247896859520216	4.70501638659576e-05	0.000110763223856392	0.000122187301134695	0.000128641170721635	0.000139986729184714	6.69299489325627e-05	0.000198096920080098	0.000233127377764849	0.000263253589638172	0.709055937289204	0.185343923048236	1.34045185464854	unchanged	C02737	Amoebiasis(ko05146);;Leishmaniasis(ko05140);;Glycine, serine and threonine metabolism(ko00260);;Metabolic pathways(ko01100);;Systemic lupus erythematosus(ko05322);;Glycerophospholipid metabolism(ko00564)	LMGP03010962	PS(18:0/20:0)	1-octadecanoyl-2-eicosanoyl-glycero-3-phosphoserine	PS(38:0); PS(18:0_20:0)	Glycerophospholipids [GP]	Glycerophosphoserines [GP03]	Diacylglycerophosphoserines [GP0301]	HMDB0010164	Organic compounds	Lipids and lipid-like molecules	Glycerophospholipids	Glycerophosphoserines	52926069	_
pos_1899	Ergothioneine	1.19213902522001e-05	1.17015607027979e-05	1.12151515883082e-05	1.23708602862353e-05	1.2795645856073e-05	1.27251366028077e-05	6.91123286441066e-06	7.84265873337014e-06	1.52353829006076e-05	1.14299260964761e-05	1.22399272377404e-05	1.04039022995409e-05	-0.231765203426217	0.301424406265903	1.21209038630251	unchanged	C05570	Metabolic pathways(ko01100);;Histidine metabolism(ko00340)	--	--	--	--	--	--	--	--	--	--	--	--	--	--
pos_19	Cellobiose	0.000754628799211186	0.000689185942934045	0.000750556103184053	0.000621720538083001	0.000592356481098528	0.000797793232519584	0.000725419231660012	0.000700631676020376	0.00081862163465382	0.000756055464885327	0.000778064113374993	0.000777630754093582	0.121794544560736	0.158794298495948	1.51659991174247	unchanged	C00185	Starch and sucrose metabolism(ko00500);;Metabolic pathways(ko01100);;ABC transporters(ko02010)	--	--	--	--	--	--	--	HMDB0000055	Organic compounds	Organic oxygen compounds	Organooxygen compounds	Carbohydrates and carbohydrate conjugates	10712	528-50-7
pos_190	1-Linoleoyl Glycerol	0.000545204300247028	0.000353798051885545	0.0005061831348606	0.000495874049657757	0.000299944515356895	0.000467596168335896	0.000339283339385255	0.00037649492751046	0.000284576462966253	0.000275214110136873	0.000487094802511239	0.000449220664709464	-0.272199381875401	0.179963425790286	1.40679710555685	unchanged	--	--	--	--	--	--	--	--	--	--	--	--	--	--	--	--
pos_1900	Prednisone	6.72733902283146e-05	0.000100115290555478	5.35039802318278e-05	7.446678574823e-05	6.40790461219009e-05	6.68002800462343e-05	7.09084368705511e-05	6.10700957073848e-05	6.24281347757275e-05	7.47466513543505e-05	9.79081453429503e-05	5.15757227541451e-05	-0.0284711318512212	0.892878067774133	0.0619234996441679	unchanged	--	--	LMST02030180	prednisone	17,21-dihydroxypregna-1,4-diene-3,11,20-trione	1,2-Dehydrocortisone; 1,4-Pregnadiene-17alpha,21-diol-3,11,20-trione; 17,21-Dihydroxypregna-1,4-diene-3,11,20-trione; Prednisone	Sterol Lipids [ST]	Steroids [ST02]	C21 steroids (gluco/mineralocorticoids, progestogins) and derivatives [ST0203]	--	--	--	--	--	--	--
pos_1901	Nb-Feruloyltryptamine	5.55280073315982e-05	7.48858238438787e-05	4.87660089169946e-05	5.70357538647828e-05	5.55404620180546e-05	5.30548255524653e-05	6.14141822401016e-05	5.59347345288305e-05	5.62800939656655e-05	5.52260413849149e-05	5.51557872303681e-05	4.7561240957276e-05	-0.0471809195057542	0.60670128779991	0.383547858214899	unchanged	--	--	--	--	--	--	--	--	--	--	--	--	--	--	--	--
pos_1902	Hygromycin B	5.52059532889937e-06	4.96674919147518e-06	1.63917689020252e-06	4.16438822473417e-06	6.3949279062178e-06	4.37099854969071e-06	4.8303268503691e-06	4.20287869903565e-06	4.08526353596306e-06	5.91479793466062e-06	3.63602485900873e-06	4.80014953387578e-06	0.118434202305778	0.928262346465465	0.0911512714730681	unchanged	--	--	--	--	--	--	--	--	--	HMDB0034229	Organic compounds	Organic oxygen compounds	Organooxygen compounds	Carbohydrates and carbohydrate conjugates	3659	31282-04-9
pos_1903	Gladiatoside B3	3.17200811460363e-05	3.05114252440815e-05	1.50766246608634e-05	1.84251653178494e-05	4.33383379188747e-05	3.54028123822028e-05	3.20385233819809e-05	2.24879592667725e-05	2.96254241263195e-05	1.74549533845537e-05	2.67792413975358e-05	1.98393828470214e-05	-0.176554985891242	0.400630097493813	0.774577791088092	unchanged	--	--	--	--	--	--	--	--	--	--	--	--	--	--	--	--
pos_1904	Linoleic acid	1.87766409880479e-05	1.83875779879536e-05	1.24145871789618e-05	1.53436541184723e-05	1.64412058384966e-05	1.3506173089652e-05	9.3103330168534e-06	2.2536110288283e-05	1.35935557105537e-05	9.33605066108909e-06	1.77229168107357e-05	1.44932792586674e-05	-0.182388903785252	0.589134121852844	0.684011401548676	unchanged	C01595	Biosynthesis of unsaturated fatty acids(ko01040);;Metabolic pathways(ko01100);;Linoleic acid metabolism(ko00591)	LMFA01030120	Linoleic acid	9Z,12Z-octadecadienoic acid	cis-9, cis-12-octadecadienoic acid; cis,cis-Linoleic acid; cis,cis-9,12-octadecadienoic acid; Linoleate; 9Z,12Z-Linoleic acid; Telfairic acid; C18:2n-6,9; Linolic acid; Leinolic acid	Fatty Acyls [FA]	Fatty Acids and Conjugates [FA01]	Unsaturated fatty acids [FA0103]	HMDB0006270	Organic compounds	Lipids and lipid-like molecules	Fatty Acyls	Lineolic acids and derivatives	5282457	506-21-8
pos_1905	Lisdexamfetamine	0.000413274830484313	0.000258791020114456	0.000209965043247201	0.000241806277349171	0.000295092503158559	0.000291515972432752	0.000306866111918839	0.000289983834997495	0.00060072978905	0.000174622660577447	0.000334780957474246	0.000260394467729121	0.133470493215981	0.534201487962231	0.603488768202539	unchanged	--	--	--	--	--	--	--	--	--	--	--	--	--	--	--	--
pos_1907	Methyl (9Z)-6'-oxo-6,5'-diapo-6-carotenoate	0.000125055143019783	3.53104599891683e-05	3.54029029639712e-05	2.83571267390091e-05	7.58997668875713e-05	7.1130594358771e-05	7.05046535778113e-05	6.23363034920216e-05	5.07468841702161e-05	4.84920113849488e-05	5.86937742520264e-05	5.18316757536237e-05	0.0765276922417133	0.769304174160394	0.383018799614032	unchanged	--	--	--	--	--	--	--	--	--	--	--	--	--	--	--	--
pos_1908	Calendasaponin B	6.62961648231401e-05	4.15257327742404e-05	4.12751908370587e-05	3.20705248359784e-05	3.46795220020815e-05	2.65541554270807e-05	2.31711022761307e-05	1.52433673859452e-05	2.94412644439757e-05	2.38587833094869e-05	1.88076684602546e-05	1.81368316413224e-05	-0.884893943186183	0.0188326992772981	2.38553878322572	down	--	--	--	--	--	--	--	--	--	--	--	--	--	--	--	--
pos_191	Pfaffic acid	0.00554351973029737	0.00571596478492247	0.00368682698774621	0.00777895726917029	0.00695663621137438	0.00655274581861659	0.00492967113784619	0.00535610215235919	0.00684328706256829	0.00559686117797696	0.00636412168836654	0.0049261333355405	-0.0643076393321085	0.591219563586905	0.630645754673677	unchanged	--	--	LMPR0106250001	Pfaffic acid	-	-	Prenol Lipids [PR]	Isoprenoids [PR01]	C30 isoprenoids (triterpenes) [PR0106]	--	--	--	--	--	--	--
pos_1912	Quercetin 4',7-diglucoside	0.000403893034863225	9.97300755453373e-05	0.000121432305972942	8.97063878801197e-05	0.000233419186266953	0.000235571982419755	0.000206801254025396	0.000186213003935038	0.00015019005574806	0.000155867953299674	0.000175029618031978	0.000162786888003209	0.0150493529430555	0.643017198110218	0.573935741201319	unchanged	--	--	--	--	--	--	--	--	--	--	--	--	--	--	--	--
pos_1913	Nummularine B	4.45778072659227e-05	1.26206588659166e-05	9.25099977192354e-06	8.75760792785651e-06	3.49643113532501e-05	2.7003416082868e-05	3.07055082640842e-05	2.35458784096291e-05	1.6103884216685e-05	1.83361507455985e-05	2.31644860122834e-05	2.02342464515656e-05	0.202892912524442	0.899943711839568	0.169016267572574	unchanged	--	--	--	--	--	--	--	--	--	HMDB0029334	Organic compounds	Organic acids and derivatives	Carboxylic acids and derivatives	Amino acids, peptides, and analogues	_	53947-96-9
pos_1915	1-(9H-Pyrido[3,4-b]indol-1-yl)-1,4-butanediol	6.38221313054648e-05	1.57963597609369e-05	6.86080281406071e-06	6.36254267756249e-06	3.06569246034305e-05	2.83017395418819e-05	2.1797171804062e-05	1.47873848898957e-05	1.49972726156039e-05	1.19628483564284e-05	1.34299124446631e-05	1.41644890293342e-05	-0.299229969977979	0.304455748678373	1.1521610228726	unchanged	--	--	--	--	--	--	--	--	--	--	--	--	--	--	--	--
pos_1917	3'-Deaminofusarochromanone	0.000119273773592025	9.364225030884e-05	9.52876515081652e-05	0.000106436028235151	0.000129007367765583	0.000119197334859798	0.000199888085784674	0.000153731121093064	9.38370821228119e-05	0.000150717419275161	0.000154289162044842	0.000145279763124455	0.413914481174565	0.035821514755463	2.14124248575738	up	--	--	--	--	--	--	--	--	--	--	--	--	--	--	--	--
pos_1918	Molindone	0	0	0	2.7083449092956e-06	0	0	0	1.09973198402141e-06	0	0	0	1.27985486626865e-05	4.10775230807725	0.422589040242352	0.885465533409614	unchanged	--	--	--	--	--	--	--	--	--	--	--	--	--	--	--	--
pos_192	4-Acetyl-6-tert-butyl-1,1-dimethylindane	3.98174131875597e-05	5.58109192592473e-05	9.30065714280904e-05	7.52896012683023e-05	4.83477493303108e-05	6.30000878513963e-05	4.41148936112086e-05	7.00310179265976e-05	4.58701072525676e-05	4.5495419060149e-05	6.46040828687306e-05	0.00010850939742781	-0.0114373146855655	0.966155263848073	0.0579379328453971	unchanged	--	--	--	--	--	--	--	--	--	--	--	--	--	--	--	--
pos_1920	CPA(18:1(11Z)/0:0)	9.29124664832951e-06	7.25071159165278e-06	3.89768601548959e-05	4.64903492065118e-07	7.80167264004255e-07	1.01472073225573e-05	3.2508651414416e-06	1.90683853140584e-05	2.96722507653615e-06	9.30341767442417e-06	1.4096640039322e-05	4.49713096392043e-05	1.13510199478632	0.617585045189034	0.520469640827666	unchanged	--	--	--	--	--	--	--	--	--	--	--	--	--	--	--	--
[truncated: 1,531 more rows]
