# Supplementary material for: Multi-omics analyses reveal that the gut microbiome and its metabolites promote milk fat synthesis in Zhongdian yak cows
Source: PeerJ journal article supplement (doi:10.7717/peerj.14444), 2022-12-02
Supplement: biomarker_Web_Report_.zip [file readme.pdf › Web_Report/readme.pdf]

## Web\_Report

### -----Data\_assess 数据评估结果

-----group\_info.txt 样本分组信息

-----metabolites\_intensity 代谢物定量结果

-----All\_metabolite\_profiles.xls 所有鉴定代谢物定量文件

-----metabolites\_exp.xls 鉴定到代谢物名称的定量文件

-----metabolites\_full\_table.xls 带有代谢物注释信息的定量文件

-----correlation\_analysis 样本相关性结果

-----All\_cor.pdf 样本相关性热图

-----All\_cor.png 样本相关性热图

-----All\_cor.xls 样本相关性文件

-----heatmap 所有样本聚类热图结果

-----All\_heatmap.pdf 所有样本聚类热图

-----All\_heatmap.png 所有样本聚类热图

-----All\_heatmap.xls 所有样本聚类热图作图文件

-----PCA 所有样本主成分分析结果

-----All\_pca3D.pdf 所有样本PCA分析三维图

-----All\_pca3D.png 所有样本PCA分析三维图

-----All\_pca.pdf 所有样本PCA分析二维图

-----All\_pca.png 所有样本PCA分析二维图

-----All\_pca\_loadings.xls 所有样本PCA分析载荷值文件

### -----Metabolites\_annotation 所有代谢物数据库注释结果

-----KEGG 所有代谢物KEGG数据库注释结果

-----meta\_kegg\_anno\_categroy.xls 所有代谢物KEGG通路统计结果

-----meta\_kegg\_anno.xls 所有代谢物KEGG注释结果

-----meta\_kegg\_anno.png 所有代谢物KEGG通路top20柱形图

-----All\_kegg\_map 所有代谢物通路图注释

-----ko\*.html 所有代谢物通路图

-----ko\*.png 所有代谢物通路图

-----HMDB 所有代谢物HMDB数据库注释结果

-----meta\_hmdb\_anno.xls 所有代谢物HMDB数据库注释表格

-----meta\_hmdb\_anno\_categroy.xls 所有代谢物HMDB数据库分类表格

-----meta\_hmdb\_anno.pdf 所有代谢物HMDB数据库分类top20柱形图

-----Lipidmaps 所有代谢物Lipidmaps数据库注释结果

-----meta\_lipidmaps\_anno.xls 所有代谢物Lipidmaps数据库注释表格

-----meta\_lipidmaps\_anno\_categroy.xls 所有代谢物Lipidmaps数据库分类结果

-----meta\_lipidmaps\_anno.png 所有代谢物Lipidmaps数据库分类top20柱形图

### -----Diff\_analysis 各个分组差异分析结果

-----Diff\_KEGG\_anno\_stat.xls 差异代谢物KEGG注释统计结果

-----\*\_vs\_\* 差异分组分析结果

-----\*\_vs\_\*.all.xls 未经过筛选的差异分析结果

-----\*\_vs\_\*.diff\_final.xls 经过筛选的差异分析结果

-----\*\_vs\_\*.diff\_heatmap.pdf 差异代谢物聚类热图(进行样本聚类)

-----\*\_vs\_\*.diff\_heatmap.png 差异代谢物聚类热图(进行样本聚类)

-----\*\_vs\_\*.diff\_heatmap\_name.pdf 差异代谢物聚类热图(进行样本聚类且添加代谢物名称)

-----\*\_vs\_\*.diff\_heatmap\_nonclustered\_samples.pdf 差异代谢物聚类热图(不进行样本聚类)

-----\*\_vs\_\*.diff\_heatmap\_nonclustered\_samples.png 差异代谢物聚类热图(不进行样本聚类)

-----\*\_vs\_\*.diff\_heatmap\_nonclustered\_samples\_name.pdf 差异代谢物聚类热图(不进行样本聚类且添加代谢物名称)

-----\*\_vs\_\*.OPLS\_DA.pdf 差异分组OPLS-DA得分图

-----\*\_vs\_\*.OPLS\_DA\_permutation.pdf 差异分组OPLS-DA检验图

-----\*\_vs\_\*.OPLS\_DA\_permutation.png 差异分组OPLS-DA检验图

-----\*\_vs\_\*.OPLS\_DA.png 差异分组OPLS-DA得分图

- \*\_vs\_\*\_pca3D.pdf 差异分组PCA分析三维图
    - \*\_vs\_\*\_pca3D.png 差异分组PCA分析三维图
    - \*\_vs\_\*\_pca.pdf 差异分组PCA分析二维图
    - \*\_vs\_\*\_pca.png 差异分组PCA分析二维图
    - \*\_vs\_\*\_Top\_20\_FC\_change.pdf 差异分组差异倍数柱图
    - \*\_vs\_\*\_Top\_20\_FC\_change.png 差异分组差异倍数柱图
    - \*\_vs\_\*\_.volcano.pdf 差异分组火山图
    - \*\_vs\_\*\_.volcano.png 差异分组火山图
    - KEGG 差异分组KEGG注释结果
      - Graph 差异分组KEGG富集结果
      - kegg\_map 差异代谢物通路图注释
        - ko\*.html 差异代谢物通路图
        - ko\*.png 差异代谢物通路图
  - venn 各分组间的韦恩图
    - \*\_venn.pdf 差异分组间的韦恩图
    - \*\_venn.png 差异分组间的韦恩图
    - All\_diff\_stat.txt 差异代谢物数目统计结果
    - Diff\_Venn\_Intersection.xls 差异代谢物交集统计结果
    - Diff\_Venn\_Union.xls 差异代谢物并集统计结果
- readme.pdf 说明文档

Copyright © 2009-2021 北京百迈客生物科技有限公司版权所有 京ICP备10042835号

公司地址：北京市顺义区南法信府前街12号顺捷大厦5层

Tel:400-600-3186

Fax:010-57045001

Tel:400-600-3186

E-mail:tech@biomarker.com.cn (mailto:tech@biomarker.com.cn)

微信:biomarker\_tech

百迈客生物云平台 (<https://www.biocloud.net/external/login/toLogin>)

关于我们 (<http://www.biomarker.com.cn>)
