# Supplementary material for: Multi-omics analyses reveal that the gut microbiome and its metabolites promote milk fat synthesis in Zhongdian yak cows
Source: PeerJ journal article supplement (doi:10.7717/peerj.14444), 2022-12-02
Supplement: H__.zip [file correlation_tab.xls]

taxon	var0	var1	var2	var3	var4	var5	var6	var7	var8	var9	var10	var11	var12	var13	var14	var15	var16	var17	var18	var19	var20	var21	var22	var23	var24	var25	var26	var27	var28	var29	var30	var31	var32	var33	var34	var35	var36	var37	var38	var39	var40	var41	var42	var43	var44	var45	var46	var47	var48
var0	1	-0.9	-0.7	-0.7	-0.7	0.3	-0.7	0.2	1	-0.7	-0.7	-0.5	0.6	-0.5	-0.9	-0.4	-0.7	-0.7	-0.6	0.6	0.3	-0.6	-0.2	1	0.3	-0.1	0.7	-0.1	-0.1	-0.4	0.3	0.8	-0.7	-0.2	-0.6	0.8	-0.3	-0.1	-0.7	0.2	0	-1	-0.3	-0.9	-0.7	0.4	0.7	-0.7	0.1
var1	-0.9	1	0.9	0.9	0.9	0.1	0.6	-0.1	-0.9	0.9	0.9	0.8	-0.7	0.8	1	0.3	0.9	0.9	0.7	-0.7	0.1	0.3	0.1	-0.9	-0.6	0	-0.6	0.5	0	0.3	-0.1	-0.6	0.9	0.1	0.7	-0.9	0.1	0	0.9	-0.1	0.1	0.9	0.1	1	0.9	-0.3	-0.6	0.9	-0.2
var2	-0.7	0.9	1	1	1	0.3	0.7	-0.3	-0.7	0.8	1	0.9	-0.9	0.9	0.9	0	1	1	0.5	-0.9	0.3	0.1	-0.3	-0.7	-0.7	-0.4	-0.7	0.6	-0.4	0.5	0.3	-0.5	0.8	-0.3	0.5	-0.8	0.2	-0.4	1	-0.3	-0.2	0.7	0.2	0.9	0.8	-0.5	-0.7	0.8	-0.5
var3	-0.7	0.9	1	1	1	0.3	0.7	-0.3	-0.7	0.8	1	0.9	-0.9	0.9	0.9	0	1	1	0.5	-0.9	0.3	0.1	-0.3	-0.7	-0.7	-0.4	-0.7	0.6	-0.4	0.5	0.3	-0.5	0.8	-0.3	0.5	-0.8	0.2	-0.4	1	-0.3	-0.2	0.7	0.2	0.9	0.8	-0.5	-0.7	0.8	-0.5
var4	-0.7	0.9	1	1	1	0.3	0.7	-0.3	-0.7	0.8	1	0.9	-0.9	0.9	0.9	0	1	1	0.5	-0.9	0.3	0.1	-0.3	-0.7	-0.7	-0.4	-0.7	0.6	-0.4	0.5	0.3	-0.5	0.8	-0.3	0.5	-0.8	0.2	-0.4	1	-0.3	-0.2	0.7	0.2	0.9	0.8	-0.5	-0.7	0.8	-0.5
var5	0.3	0.1	0.3	0.3	0.3	1	-0.3	0	0.3	0.2	0.3	0.4	-0.1	0.4	0.1	0.1	0.3	0.3	-0.1	-0.1	1	-0.4	-0.3	0.3	-0.8	-0.1	0.3	0.9	-0.1	-0.4	0.2	0.3	0.2	-0.3	-0.1	-0.3	-0.7	-0.1	0.3	0	0.3	-0.3	-0.7	0.1	0.2	0.4	0.3	0.2	-0.4
var6	-0.7	0.6	0.7	0.7	0.7	-0.3	1	-0.7	-0.7	0.3	0.7	0.4	-0.9	0.4	0.6	-0.1	0.7	0.7	0.1	-0.9	-0.3	0.5	-0.5	-0.7	-0.2	-0.6	-1	-0.1	-0.6	0.9	0.3	-0.8	0.3	-0.5	0.1	-0.5	0.7	-0.6	0.7	-0.7	-0.7	0.7	0.7	0.6	0.3	-0.9	-1	0.3	-0.6
var7	0.2	-0.1	-0.3	-0.3	-0.3	0	-0.7	1	0.2	0.3	-0.3	0.1	0.6	0.1	-0.1	-0.1	-0.3	-0.3	0.6	0.6	0	-0.6	0.8	0.2	0.3	0.6	0.7	0.1	0.6	-0.6	-0.2	0.7	0.3	0.8	0.6	0.3	-0.3	0.6	-0.3	1	0.7	-0.2	-0.3	-0.1	0.3	0.6	0.7	0.3	0.9
var8	1	-0.9	-0.7	-0.7	-0.7	0.3	-0.7	0.2	1	-0.7	-0.7	-0.5	0.6	-0.5	-0.9	-0.4	-0.7	-0.7	-0.6	0.6	0.3	-0.6	-0.2	1	0.3	-0.1	0.7	-0.1	-0.1	-0.4	0.3	0.8	-0.7	-0.2	-0.6	0.8	-0.3	-0.1	-0.7	0.2	0	-1	-0.3	-0.9	-0.7	0.4	0.7	-0.7	0.1
var9	-0.7	0.9	0.8	0.8	0.8	0.2	0.3	0.3	-0.7	1	0.8	0.9	-0.5	0.9	0.9	0.1	0.8	0.8	0.9	-0.5	0.2	-0.1	0.3	-0.7	-0.5	0.1	-0.3	0.6	0.1	0.1	0	-0.2	1	0.3	0.9	-0.7	0	0.1	0.8	0.3	0.3	0.7	0	0.9	1	-0.1	-0.3	1	0.1
var10	-0.7	0.9	1	1	1	0.3	0.7	-0.3	-0.7	0.8	1	0.9	-0.9	0.9	0.9	0	1	1	0.5	-0.9	0.3	0.1	-0.3	-0.7	-0.7	-0.4	-0.7	0.6	-0.4	0.5	0.3	-0.5	0.8	-0.3	0.5	-0.8	0.2	-0.4	1	-0.3	-0.2	0.7	0.2	0.9	0.8	-0.5	-0.7	0.8	-0.5
var11	-0.5	0.8	0.9	0.9	0.9	0.4	0.4	0.1	-0.5	0.9	0.9	1	-0.7	1	0.8	-0.2	0.9	0.9	0.7	-0.7	0.4	-0.3	-0.1	-0.5	-0.6	-0.3	-0.4	0.7	-0.3	0.3	0.4	-0.1	0.9	-0.1	0.7	-0.6	0.1	-0.3	0.9	0.1	0	0.5	0.1	0.8	0.9	-0.3	-0.4	0.9	-0.2
var12	0.6	-0.7	-0.9	-0.9	-0.9	-0.1	-0.9	0.6	0.6	-0.5	-0.9	-0.7	1	-0.7	-0.7	0.2	-0.9	-0.9	-0.2	1	-0.1	-0.2	0.6	0.6	0.5	0.7	0.9	-0.3	0.7	-0.8	-0.5	0.6	-0.5	0.6	-0.2	0.6	-0.5	0.7	-0.9	0.6	0.6	-0.6	-0.5	-0.7	-0.5	0.8	0.9	-0.5	0.7
var13	-0.5	0.8	0.9	0.9	0.9	0.4	0.4	0.1	-0.5	0.9	0.9	1	-0.7	1	0.8	-0.2	0.9	0.9	0.7	-0.7	0.4	-0.3	-0.1	-0.5	-0.6	-0.3	-0.4	0.7	-0.3	0.3	0.4	-0.1	0.9	-0.1	0.7	-0.6	0.1	-0.3	0.9	0.1	0	0.5	0.1	0.8	0.9	-0.3	-0.4	0.9	-0.2
var14	-0.9	1	0.9	0.9	0.9	0.1	0.6	-0.1	-0.9	0.9	0.9	0.8	-0.7	0.8	1	0.3	0.9	0.9	0.7	-0.7	0.1	0.3	0.1	-0.9	-0.6	0	-0.6	0.5	0	0.3	-0.1	-0.6	0.9	0.1	0.7	-0.9	0.1	0	0.9	-0.1	0.1	0.9	0.1	1	0.9	-0.3	-0.6	0.9	-0.2
var15	-0.4	0.3	0	0	0	0.1	-0.1	-0.1	-0.4	0.1	0	-0.2	0.2	-0.2	0.3	1	0	0	0	0.2	0.1	0.7	0.4	-0.4	-0.4	0.7	0.1	0.2	0.7	-0.5	-0.9	-0.5	0.1	0.4	0	-0.6	-0.6	0.7	0	-0.1	0.6	0.4	-0.6	0.3	0.1	0.5	0.1	0.1	0
var16	-0.7	0.9	1	1	1	0.3	0.7	-0.3	-0.7	0.8	1	0.9	-0.9	0.9	0.9	0	1	1	0.5	-0.9	0.3	0.1	-0.3	-0.7	-0.7	-0.4	-0.7	0.6	-0.4	0.5	0.3	-0.5	0.8	-0.3	0.5	-0.8	0.2	-0.4	1	-0.3	-0.2	0.7	0.2	0.9	0.8	-0.5	-0.7	0.8	-0.5
var17	-0.7	0.9	1	1	1	0.3	0.7	-0.3	-0.7	0.8	1	0.9	-0.9	0.9	0.9	0	1	1	0.5	-0.9	0.3	0.1	-0.3	-0.7	-0.7	-0.4	-0.7	0.6	-0.4	0.5	0.3	-0.5	0.8	-0.3	0.5	-0.8	0.2	-0.4	1	-0.3	-0.2	0.7	0.2	0.9	0.8	-0.5	-0.7	0.8	-0.5
var18	-0.6	0.7	0.5	0.5	0.5	-0.1	0.1	0.6	-0.6	0.9	0.5	0.7	-0.2	0.7	0.7	0	0.5	0.5	1	-0.2	-0.1	-0.2	0.6	-0.6	-0.1	0.3	-0.1	0.3	0.3	0	-0.1	0	0.9	0.6	1	-0.4	0.1	0.3	0.5	0.6	0.4	0.6	0.1	0.7	0.9	0	-0.1	0.9	0.5
var19	0.6	-0.7	-0.9	-0.9	-0.9	-0.1	-0.9	0.6	0.6	-0.5	-0.9	-0.7	1	-0.7	-0.7	0.2	-0.9	-0.9	-0.2	1	-0.1	-0.2	0.6	0.6	0.5	0.7	0.9	-0.3	0.7	-0.8	-0.5	0.6	-0.5	0.6	-0.2	0.6	-0.5	0.7	-0.9	0.6	0.6	-0.6	-0.5	-0.7	-0.5	0.8	0.9	-0.5	0.7
var20	0.3	0.1	0.3	0.3	0.3	1	-0.3	0	0.3	0.2	0.3	0.4	-0.1	0.4	0.1	0.1	0.3	0.3	-0.1	-0.1	1	-0.4	-0.3	0.3	-0.8	-0.1	0.3	0.9	-0.1	-0.4	0.2	0.3	0.2	-0.3	-0.1	-0.3	-0.7	-0.1	0.3	0	0.3	-0.3	-0.7	0.1	0.2	0.4	0.3	0.2	-0.4
var21	-0.6	0.3	0.1	0.1	0.1	-0.4	0.5	-0.6	-0.6	-0.1	0.1	-0.3	-0.2	-0.3	0.3	0.7	0.1	0.1	-0.2	-0.2	-0.4	1	0	-0.6	-0.1	0.2	-0.5	-0.3	0.2	0.2	-0.6	-0.9	-0.1	0	-0.2	-0.5	0.1	0.2	0.1	-0.6	-0.1	0.6	0.1	0.3	-0.1	-0.2	-0.5	-0.1	-0.3
var22	-0.2	0.1	-0.3	-0.3	-0.3	-0.3	-0.5	0.8	-0.2	0.3	-0.3	-0.1	0.6	-0.1	0.1	0.4	-0.3	-0.3	0.6	0.6	-0.3	0	1	-0.2	0.3	0.9	0.5	-0.1	0.9	-0.6	-0.7	0.2	0.3	1	0.6	0	-0.3	0.9	-0.3	0.8	0.8	0.2	-0.3	0.1	0.3	0.6	0.5	0.3	0.9
var23	1	-0.9	-0.7	-0.7	-0.7	0.3	-0.7	0.2	1	-0.7	-0.7	-0.5	0.6	-0.5	-0.9	-0.4	-0.7	-0.7	-0.6	0.6	0.3	-0.6	-0.2	1	0.3	-0.1	0.7	-0.1	-0.1	-0.4	0.3	0.8	-0.7	-0.2	-0.6	0.8	-0.3	-0.1	-0.7	0.2	0	-1	-0.3	-0.9	-0.7	0.4	0.7	-0.7	0.1
var24	0.3	-0.6	-0.7	-0.7	-0.7	-0.8	-0.2	0.3	0.3	-0.5	-0.7	-0.6	0.5	-0.6	-0.6	-0.4	-0.7	-0.7	-0.1	0.5	-0.8	-0.1	0.3	0.3	1	0.1	0.2	-0.9	0.1	0.1	0	0.3	-0.5	0.3	-0.1	0.8	0.5	0.1	-0.7	0.3	-0.2	-0.3	0.5	-0.6	-0.5	-0.1	0.2	-0.5	0.6
var25	-0.1	0	-0.4	-0.4	-0.4	-0.1	-0.6	0.6	-0.1	0.1	-0.4	-0.3	0.7	-0.3	0	0.7	-0.4	-0.4	0.3	0.7	-0.1	0.2	0.9	-0.1	0.1	1	0.6	0	1	-0.8	-0.9	0.1	0.1	0.9	0.3	-0.1	-0.6	1	-0.4	0.6	0.9	0.1	-0.6	0	0.1	0.8	0.6	0.1	0.7
var26	0.7	-0.6	-0.7	-0.7	-0.7	0.3	-1	0.7	0.7	-0.3	-0.7	-0.4	0.9	-0.4	-0.6	0.1	-0.7	-0.7	-0.1	0.9	0.3	-0.5	0.5	0.7	0.2	0.6	1	0.1	0.6	-0.9	-0.3	0.8	-0.3	0.5	-0.1	0.5	-0.7	0.6	-0.7	0.7	0.7	-0.7	-0.7	-0.6	-0.3	0.9	1	-0.3	0.6
var27	-0.1	0.5	0.6	0.6	0.6	0.9	-0.1	0.1	-0.1	0.6	0.6	0.7	-0.3	0.7	0.5	0.2	0.6	0.6	0.3	-0.3	0.9	-0.3	-0.1	-0.1	-0.9	0	0.1	1	0	-0.3	0.1	0.1	0.6	-0.1	0.3	-0.6	-0.6	0	0.6	0.1	0.4	0.1	-0.6	0.5	0.6	0.3	0.1	0.6	-0.3
var28	-0.1	0	-0.4	-0.4	-0.4	-0.1	-0.6	0.6	-0.1	0.1	-0.4	-0.3	0.7	-0.3	0	0.7	-0.4	-0.4	0.3	0.7	-0.1	0.2	0.9	-0.1	0.1	1	0.6	0	1	-0.8	-0.9	0.1	0.1	0.9	0.3	-0.1	-0.6	1	-0.4	0.6	0.9	0.1	-0.6	0	0.1	0.8	0.6	0.1	0.7
var29	-0.4	0.3	0.5	0.5	0.5	-0.4	0.9	-0.6	-0.4	0.1	0.5	0.3	-0.8	0.3	0.3	-0.5	0.5	0.5	0	-0.8	-0.4	0.2	-0.6	-0.4	0.1	-0.8	-0.9	-0.3	-0.8	1	0.6	-0.5	0.1	-0.6	0	-0.1	0.9	-0.8	0.5	-0.6	-0.9	0.4	0.9	0.3	0.1	-1	-0.9	0.1	-0.5
var30	0.3	-0.1	0.3	0.3	0.3	0.2	0.3	-0.2	0.3	0	0.3	0.4	-0.5	0.4	-0.1	-0.9	0.3	0.3	-0.1	-0.5	0.2	-0.6	-0.7	0.3	0	-0.9	-0.3	0.1	-0.9	0.6	1	0.3	0	-0.7	-0.1	0.3	0.5	-0.9	0.3	-0.2	-0.7	-0.3	0.5	-0.1	0	-0.6	-0.3	0	-0.4
var31	0.8	-0.6	-0.5	-0.5	-0.5	0.3	-0.8	0.7	0.8	-0.2	-0.5	-0.1	0.6	-0.1	-0.6	-0.5	-0.5	-0.5	0	0.6	0.3	-0.9	0.2	0.8	0.3	0.1	0.8	0.1	0.1	-0.5	0.3	1	-0.2	0.2	0	0.7	-0.3	0.1	-0.5	0.7	0.3	-0.8	-0.3	-0.6	-0.2	0.5	0.8	-0.2	0.5
var32	-0.7	0.9	0.8	0.8	0.8	0.2	0.3	0.3	-0.7	1	0.8	0.9	-0.5	0.9	0.9	0.1	0.8	0.8	0.9	-0.5	0.2	-0.1	0.3	-0.7	-0.5	0.1	-0.3	0.6	0.1	0.1	0	-0.2	1	0.3	0.9	-0.7	0	0.1	0.8	0.3	0.3	0.7	0	0.9	1	-0.1	-0.3	1	0.1
var33	-0.2	0.1	-0.3	-0.3	-0.3	-0.3	-0.5	0.8	-0.2	0.3	-0.3	-0.1	0.6	-0.1	0.1	0.4	-0.3	-0.3	0.6	0.6	-0.3	0	1	-0.2	0.3	0.9	0.5	-0.1	0.9	-0.6	-0.7	0.2	0.3	1	0.6	0	-0.3	0.9	-0.3	0.8	0.8	0.2	-0.3	0.1	0.3	0.6	0.5	0.3	0.9
var34	-0.6	0.7	0.5	0.5	0.5	-0.1	0.1	0.6	-0.6	0.9	0.5	0.7	-0.2	0.7	0.7	0	0.5	0.5	1	-0.2	-0.1	-0.2	0.6	-0.6	-0.1	0.3	-0.1	0.3	0.3	0	-0.1	0	0.9	0.6	1	-0.4	0.1	0.3	0.5	0.6	0.4	0.6	0.1	0.7	0.9	0	-0.1	0.9	0.5
var35	0.8	-0.9	-0.8	-0.8	-0.8	-0.3	-0.5	0.3	0.8	-0.7	-0.8	-0.6	0.6	-0.6	-0.9	-0.6	-0.8	-0.8	-0.4	0.6	-0.3	-0.5	0	0.8	0.8	-0.1	0.5	-0.6	-0.1	-0.1	0.3	0.7	-0.7	0	-0.4	1	0.2	-0.1	-0.8	0.3	-0.2	-0.8	0.2	-0.9	-0.7	0.1	0.5	-0.7	0.4
var36	-0.3	0.1	0.2	0.2	0.2	-0.7	0.7	-0.3	-0.3	0	0.2	0.1	-0.5	0.1	0.1	-0.6	0.2	0.2	0.1	-0.5	-0.7	0.1	-0.3	-0.3	0.5	-0.6	-0.7	-0.6	-0.6	0.9	0.5	-0.3	0	-0.3	0.1	0.2	1	-0.6	0.2	-0.3	-0.8	0.3	1	0.1	0	-0.9	-0.7	0	-0.1
var37	-0.1	0	-0.4	-0.4	-0.4	-0.1	-0.6	0.6	-0.1	0.1	-0.4	-0.3	0.7	-0.3	0	0.7	-0.4	-0.4	0.3	0.7	-0.1	0.2	0.9	-0.1	0.1	1	0.6	0	1	-0.8	-0.9	0.1	0.1	0.9	0.3	-0.1	-0.6	1	-0.4	0.6	0.9	0.1	-0.6	0	0.1	0.8	0.6	0.1	0.7
var38	-0.7	0.9	1	1	1	0.3	0.7	-0.3	-0.7	0.8	1	0.9	-0.9	0.9	0.9	0	1	1	0.5	-0.9	0.3	0.1	-0.3	-0.7	-0.7	-0.4	-0.7	0.6	-0.4	0.5	0.3	-0.5	0.8	-0.3	0.5	-0.8	0.2	-0.4	1	-0.3	-0.2	0.7	0.2	0.9	0.8	-0.5	-0.7	0.8	-0.5
var39	0.2	-0.1	-0.3	-0.3	-0.3	0	-0.7	1	0.2	0.3	-0.3	0.1	0.6	0.1	-0.1	-0.1	-0.3	-0.3	0.6	0.6	0	-0.6	0.8	0.2	0.3	0.6	0.7	0.1	0.6	-0.6	-0.2	0.7	0.3	0.8	0.6	0.3	-0.3	0.6	-0.3	1	0.7	-0.2	-0.3	-0.1	0.3	0.6	0.7	0.3	0.9
var40	0	0.1	-0.2	-0.2	-0.2	0.3	-0.7	0.7	0	0.3	-0.2	0	0.6	0	0.1	0.6	-0.2	-0.2	0.4	0.6	0.3	-0.1	0.8	0	-0.2	0.9	0.7	0.4	0.9	-0.9	-0.7	0.3	0.3	0.8	0.4	-0.2	-0.8	0.9	-0.2	0.7	1	0	-0.8	0.1	0.3	0.9	0.7	0.3	0.6
var41	-1	0.9	0.7	0.7	0.7	-0.3	0.7	-0.2	-1	0.7	0.7	0.5	-0.6	0.5	0.9	0.4	0.7	0.7	0.6	-0.6	-0.3	0.6	0.2	-1	-0.3	0.1	-0.7	0.1	0.1	0.4	-0.3	-0.8	0.7	0.2	0.6	-0.8	0.3	0.1	0.7	-0.2	0	1	0.3	0.9	0.7	-0.4	-0.7	0.7	-0.1
var42	-0.3	0.1	0.2	0.2	0.2	-0.7	0.7	-0.3	-0.3	0	0.2	0.1	-0.5	0.1	0.1	-0.6	0.2	0.2	0.1	-0.5	-0.7	0.1	-0.3	-0.3	0.5	-0.6	-0.7	-0.6	-0.6	0.9	0.5	-0.3	0	-0.3	0.1	0.2	1	-0.6	0.2	-0.3	-0.8	0.3	1	0.1	0	-0.9	-0.7	0	-0.1
var43	-0.9	1	0.9	0.9	0.9	0.1	0.6	-0.1	-0.9	0.9	0.9	0.8	-0.7	0.8	1	0.3	0.9	0.9	0.7	-0.7	0.1	0.3	0.1	-0.9	-0.6	0	-0.6	0.5	0	0.3	-0.1	-0.6	0.9	0.1	0.7	-0.9	0.1	0	0.9	-0.1	0.1	0.9	0.1	1	0.9	-0.3	-0.6	0.9	-0.2
var44	-0.7	0.9	0.8	0.8	0.8	0.2	0.3	0.3	-0.7	1	0.8	0.9	-0.5	0.9	0.9	0.1	0.8	0.8	0.9	-0.5	0.2	-0.1	0.3	-0.7	-0.5	0.1	-0.3	0.6	0.1	0.1	0	-0.2	1	0.3	0.9	-0.7	0	0.1	0.8	0.3	0.3	0.7	0	0.9	1	-0.1	-0.3	1	0.1
var45	0.4	-0.3	-0.5	-0.5	-0.5	0.4	-0.9	0.6	0.4	-0.1	-0.5	-0.3	0.8	-0.3	-0.3	0.5	-0.5	-0.5	0	0.8	0.4	-0.2	0.6	0.4	-0.1	0.8	0.9	0.3	0.8	-1	-0.6	0.5	-0.1	0.6	0	0.1	-0.9	0.8	-0.5	0.6	0.9	-0.4	-0.9	-0.3	-0.1	1	0.9	-0.1	0.5
var46	0.7	-0.6	-0.7	-0.7	-0.7	0.3	-1	0.7	0.7	-0.3	-0.7	-0.4	0.9	-0.4	-0.6	0.1	-0.7	-0.7	-0.1	0.9	0.3	-0.5	0.5	0.7	0.2	0.6	1	0.1	0.6	-0.9	-0.3	0.8	-0.3	0.5	-0.1	0.5	-0.7	0.6	-0.7	0.7	0.7	-0.7	-0.7	-0.6	-0.3	0.9	1	-0.3	0.6
var47	-0.7	0.9	0.8	0.8	0.8	0.2	0.3	0.3	-0.7	1	0.8	0.9	-0.5	0.9	0.9	0.1	0.8	0.8	0.9	-0.5	0.2	-0.1	0.3	-0.7	-0.5	0.1	-0.3	0.6	0.1	0.1	0	-0.2	1	0.3	0.9	-0.7	0	0.1	0.8	0.3	0.3	0.7	0	0.9	1	-0.1	-0.3	1	0.1
var48	0.1	-0.2	-0.5	-0.5	-0.5	-0.4	-0.6	0.9	0.1	0.1	-0.5	-0.2	0.7	-0.2	-0.2	0	-0.5	-0.5	0.5	0.7	-0.4	-0.3	0.9	0.1	0.6	0.7	0.6	-0.3	0.7	-0.5	-0.4	0.5	0.1	0.9	0.5	0.4	-0.1	0.7	-0.5	0.9	0.6	-0.1	-0.1	-0.2	0.1	0.5	0.6	0.1	1
var49	0.7	-0.5	-0.2	-0.2	-0.2	0.2	-0.3	0.3	0.7	-0.2	-0.2	0.1	0.1	0.1	-0.5	-0.9	-0.2	-0.2	-0.1	0.1	0.2	-0.9	-0.3	0.7	0.3	-0.5	0.3	0	-0.5	0.1	0.8	0.8	-0.2	-0.3	-0.1	0.7	0.2	-0.5	-0.2	0.3	-0.3	-0.7	0.2	-0.5	-0.2	-0.1	0.3	-0.2	0.1
var50	-0.1	0.3	0.6	0.6	0.6	0.1	0.5	-0.1	-0.1	0.4	0.6	0.7	-0.7	0.7	0.3	-0.8	0.6	0.6	0.3	-0.7	0.1	-0.5	-0.5	-0.1	-0.1	-0.8	-0.5	0.2	-0.8	0.7	0.9	0.1	0.4	-0.5	0.3	0	0.6	-0.8	0.6	-0.1	-0.6	0.1	0.6	0.3	0.4	-0.7	-0.5	0.4	-0.3
var51	0.9	-0.7	-0.4	-0.4	-0.4	0.6	-0.5	-0.1	0.9	-0.6	-0.4	-0.3	0.3	-0.3	-0.7	-0.3	-0.4	-0.4	-0.7	0.3	0.6	-0.5	-0.5	0.9	-0.1	-0.3	0.5	0.2	-0.3	-0.3	0.4	0.6	-0.6	-0.5	-0.7	0.5	-0.4	-0.3	-0.4	-0.1	-0.1	-0.9	-0.4	-0.7	-0.6	0.3	0.5	-0.6	-0.3
var52	-0.6	0.7	0.9	0.9	0.9	0.1	0.9	-0.6	-0.6	0.5	0.9	0.7	-1	0.7	0.7	-0.2	0.9	0.9	0.2	-1	0.1	0.2	-0.6	-0.6	-0.5	-0.7	-0.9	0.3	-0.7	0.8	0.5	-0.6	0.5	-0.6	0.2	-0.6	0.5	-0.7	0.9	-0.6	-0.6	0.6	0.5	0.7	0.5	-0.8	-0.9	0.5	-0.7
var53	0.1	-0.3	-0.6	-0.6	-0.6	-0.1	-0.5	0.1	0.1	-0.4	-0.6	-0.7	0.7	-0.7	-0.3	0.8	-0.6	-0.6	-0.3	0.7	-0.1	0.5	0.5	0.1	0.1	0.8	0.5	-0.2	0.8	-0.7	-0.9	-0.1	-0.4	0.5	-0.3	0	-0.6	0.8	-0.6	0.1	0.6	-0.1	-0.6	-0.3	-0.4	0.7	0.5	-0.4	0.3
var54	-0.6	0.8	0.9	0.9	0.9	0.5	0.6	-0.5	-0.6	0.6	0.9	0.7	-0.8	0.7	0.8	0.3	0.9	0.9	0.2	-0.8	0.5	0.3	-0.4	-0.6	-0.9	-0.3	-0.6	0.7	-0.3	0.3	0.1	-0.6	0.6	-0.4	0.2	-0.9	-0.1	-0.3	0.9	-0.5	-0.1	0.6	-0.1	0.8	0.6	-0.3	-0.6	0.6	-0.7
var55	0.6	-0.2	0.1	0.1	0.1	0.9	-0.4	0.1	0.6	0	0.1	0.3	0	0.3	-0.2	-0.3	0.1	0.1	-0.2	0	0.9	-0.7	-0.4	0.6	-0.5	-0.3	0.4	0.7	-0.3	-0.3	0.5	0.6	0	-0.4	-0.2	0.1	-0.5	-0.3	0.1	0.1	0.1	-0.6	-0.5	-0.2	0	0.3	0.4	0	-0.3
var56	0.1	0.3	0.5	0.5	0.5	0.6	-0.1	0.4	0.1	0.6	0.5	0.8	-0.3	0.8	0.3	-0.5	0.5	0.5	0.5	-0.3	0.6	-0.8	-0.1	0.1	-0.4	-0.3	0.1	0.7	-0.3	0	0.6	0.5	0.6	-0.1	0.5	-0.1	-0.1	-0.3	0.5	0.4	0.1	-0.1	-0.1	0.3	0.6	0	0.1	0.6	0
var57	0.9	-0.7	-0.6	-0.6	-0.6	0.5	-0.9	0.5	0.9	-0.4	-0.6	-0.3	0.7	-0.3	-0.7	-0.2	-0.6	-0.6	-0.3	0.7	0.5	-0.7	0.1	0.9	0.1	0.2	0.9	0.2	0.2	-0.7	0.1	0.9	-0.4	0.1	-0.3	0.6	-0.6	0.2	-0.6	0.5	0.4	-0.9	-0.6	-0.7	-0.4	0.7	0.9	-0.4	0.3
var58	0.3	-0.4	-0.2	-0.2	-0.2	-0.5	0.2	0	0.3	-0.3	-0.2	-0.1	-0.1	-0.1	-0.4	-0.9	-0.2	-0.2	-0.1	-0.1	-0.5	-0.4	-0.3	0.3	0.7	-0.6	-0.2	-0.6	-0.6	0.6	0.7	0.3	-0.3	-0.3	-0.1	0.7	0.8	-0.6	-0.2	0	-0.7	-0.3	0.8	-0.4	-0.3	-0.6	-0.2	-0.3	0.1
var59	0.7	-0.6	-0.7	-0.7	-0.7	0.3	-1	0.7	0.7	-0.3	-0.7	-0.4	0.9	-0.4	-0.6	0.1	-0.7	-0.7	-0.1	0.9	0.3	-0.5	0.5	0.7	0.2	0.6	1	0.1	0.6	-0.9	-0.3	0.8	-0.3	0.5	-0.1	0.5	-0.7	0.6	-0.7	0.7	0.7	-0.7	-0.7	-0.6	-0.3	0.9	1	-0.3	0.6
var60	0.7	-0.6	-0.3	-0.3	-0.3	0.5	-0.2	-0.5	0.7	-0.7	-0.3	-0.4	0.1	-0.4	-0.6	-0.1	-0.3	-0.3	-0.9	0.1	0.5	-0.1	-0.7	0.7	-0.2	-0.4	0.2	0.1	-0.4	-0.1	0.3	0.2	-0.7	-0.7	-0.9	0.3	-0.3	-0.4	-0.3	-0.5	-0.3	-0.7	-0.3	-0.6	-0.7	0.1	0.2	-0.7	-0.6
var61	-0.5	0.1	-0.2	-0.2	-0.2	-0.7	0.3	-0.3	-0.5	-0.2	-0.2	-0.5	0.1	-0.5	0.1	0.6	-0.2	-0.2	-0.1	0.1	-0.7	0.9	0.3	-0.5	0.3	0.4	-0.3	-0.6	0.4	0.1	-0.7	-0.7	-0.2	0.3	-0.1	-0.2	0.2	0.4	-0.2	-0.3	0	0.5	0.2	0.1	-0.2	-0.1	-0.3	-0.2	0.1
var62	-0.6	0.2	-0.1	-0.1	-0.1	-0.9	0.4	-0.1	-0.6	0	-0.1	-0.3	0	-0.3	0.2	0.3	-0.1	-0.1	0.2	0	-0.9	0.7	0.4	-0.6	0.5	0.3	-0.4	-0.7	0.3	0.3	-0.5	-0.6	0	0.4	0.2	-0.1	0.5	0.3	-0.1	-0.1	-0.1	0.6	0.5	0.2	0	-0.3	-0.4	0	0.3
var63	-0.7	0.5	0.2	0.2	0.2	-0.2	0.3	-0.3	-0.7	0.2	0.2	-0.1	-0.1	-0.1	0.5	0.9	0.2	0.2	0.1	-0.1	-0.2	0.9	0.3	-0.7	-0.3	0.5	-0.3	0	0.5	-0.1	-0.8	-0.8	0.2	0.3	0.1	-0.7	-0.2	0.5	0.2	-0.3	0.3	0.7	-0.2	0.5	0.2	0.1	-0.3	0.2	-0.1
var64	0	-0.1	0.2	0.2	0.2	-0.3	0.7	-0.7	0	-0.3	0.2	0	-0.6	0	-0.1	-0.6	0.2	0.2	-0.4	-0.6	-0.3	0.1	-0.8	0	0.2	-0.9	-0.7	-0.4	-0.9	0.9	0.7	-0.3	-0.3	-0.8	-0.4	0.2	0.8	-0.9	0.2	-0.7	-1	0	0.8	-0.1	-0.3	-0.9	-0.7	-0.3	-0.6
var65	-0.1	0.2	0.5	0.5	0.5	0.4	0.6	-0.9	-0.1	-0.1	0.5	0.2	-0.7	0.2	0.2	0	0.5	0.5	-0.5	-0.7	0.4	0.3	-0.9	-0.1	-0.6	-0.7	-0.6	0.3	-0.7	0.5	0.4	-0.5	-0.1	-0.9	-0.5	-0.4	0.1	-0.7	0.5	-0.9	-0.6	0.1	0.1	0.2	-0.1	-0.5	-0.6	-0.1	-1
var66	0.6	-0.7	-0.9	-0.9	-0.9	-0.1	-0.9	0.6	0.6	-0.5	-0.9	-0.7	1	-0.7	-0.7	0.2	-0.9	-0.9	-0.2	1	-0.1	-0.2	0.6	0.6	0.5	0.7	0.9	-0.3	0.7	-0.8	-0.5	0.6	-0.5	0.6	-0.2	0.6	-0.5	0.7	-0.9	0.6	0.6	-0.6	-0.5	-0.7	-0.5	0.8	0.9	-0.5	0.7
var67	-1	0.9	0.7	0.7	0.7	-0.3	0.7	-0.2	-1	0.7	0.7	0.5	-0.6	0.5	0.9	0.4	0.7	0.7	0.6	-0.6	-0.3	0.6	0.2	-1	-0.3	0.1	-0.7	0.1	0.1	0.4	-0.3	-0.8	0.7	0.2	0.6	-0.8	0.3	0.1	0.7	-0.2	0	1	0.3	0.9	0.7	-0.4	-0.7	0.7	-0.1
var68	-0.6	0.3	0.1	0.1	0.1	-0.4	0.5	-0.6	-0.6	-0.1	0.1	-0.3	-0.2	-0.3	0.3	0.7	0.1	0.1	-0.2	-0.2	-0.4	1	0	-0.6	-0.1	0.2	-0.5	-0.3	0.2	0.2	-0.6	-0.9	-0.1	0	-0.2	-0.5	0.1	0.2	0.1	-0.6	-0.1	0.6	0.1	0.3	-0.1	-0.2	-0.5	-0.1	-0.3
var69	-0.6	0.3	0.1	0.1	0.1	-0.4	0.5	-0.6	-0.6	-0.1	0.1	-0.3	-0.2	-0.3	0.3	0.7	0.1	0.1	-0.2	-0.2	-0.4	1	0	-0.6	-0.1	0.2	-0.5	-0.3	0.2	0.2	-0.6	-0.9	-0.1	0	-0.2	-0.5	0.1	0.2	0.1	-0.6	-0.1	0.6	0.1	0.3	-0.1	-0.2	-0.5	-0.1	-0.3
var70	0.3	-0.1	0.3	0.3	0.3	0.2	0.3	-0.2	0.3	0	0.3	0.4	-0.5	0.4	-0.1	-0.9	0.3	0.3	-0.1	-0.5	0.2	-0.6	-0.7	0.3	0	-0.9	-0.3	0.1	-0.9	0.6	1	0.3	0	-0.7	-0.1	0.3	0.5	-0.9	0.3	-0.2	-0.7	-0.3	0.5	-0.1	0	-0.6	-0.3	0	-0.4
var71	0.6	-0.7	-0.9	-0.9	-0.9	-0.1	-0.9	0.6	0.6	-0.5	-0.9	-0.7	1	-0.7	-0.7	0.2	-0.9	-0.9	-0.2	1	-0.1	-0.2	0.6	0.6	0.5	0.7	0.9	-0.3	0.7	-0.8	-0.5	0.6	-0.5	0.6	-0.2	0.6	-0.5	0.7	-0.9	0.6	0.6	-0.6	-0.5	-0.7	-0.5	0.8	0.9	-0.5	0.7
var72	0.7	-0.5	-0.2	-0.2	-0.2	0.2	-0.3	0.3	0.7	-0.2	-0.2	0.1	0.1	0.1	-0.5	-0.9	-0.2	-0.2	-0.1	0.1	0.2	-0.9	-0.3	0.7	0.3	-0.5	0.3	0	-0.5	0.1	0.8	0.8	-0.2	-0.3	-0.1	0.7	0.2	-0.5	-0.2	0.3	-0.3	-0.7	0.2	-0.5	-0.2	-0.1	0.3	-0.2	0.1
var73	0.1	-0.3	-0.6	-0.6	-0.6	-0.1	-0.5	0.1	0.1	-0.4	-0.6	-0.7	0.7	-0.7	-0.3	0.8	-0.6	-0.6	-0.3	0.7	-0.1	0.5	0.5	0.1	0.1	0.8	0.5	-0.2	0.8	-0.7	-0.9	-0.1	-0.4	0.5	-0.3	0	-0.6	0.8	-0.6	0.1	0.6	-0.1	-0.6	-0.3	-0.4	0.7	0.5	-0.4	0.3
var74	0.9	-0.7	-0.6	-0.6	-0.6	0.5	-0.9	0.5	0.9	-0.4	-0.6	-0.3	0.7	-0.3	-0.7	-0.2	-0.6	-0.6	-0.3	0.7	0.5	-0.7	0.1	0.9	0.1	0.2	0.9	0.2	0.2	-0.7	0.1	0.9	-0.4	0.1	-0.3	0.6	-0.6	0.2	-0.6	0.5	0.4	-0.9	-0.6	-0.7	-0.4	0.7	0.9	-0.4	0.3
var75	0.1	0.2	0.4	0.4	0.4	0.9	0	-0.4	0.1	0.1	0.4	0.3	-0.3	0.3	0.2	0.3	0.4	0.4	-0.3	-0.3	0.9	0	-0.5	0.1	-0.9	-0.2	0	0.8	-0.2	-0.2	0.1	-0.1	0.1	-0.5	-0.3	-0.5	-0.6	-0.2	0.4	-0.4	0.1	-0.1	-0.6	0.2	0.1	0.2	0	0.1	-0.7
var76	-0.6	0.3	0.1	0.1	0.1	-0.4	0.5	-0.6	-0.6	-0.1	0.1	-0.3	-0.2	-0.3	0.3	0.7	0.1	0.1	-0.2	-0.2	-0.4	1	0	-0.6	-0.1	0.2	-0.5	-0.3	0.2	0.2	-0.6	-0.9	-0.1	0	-0.2	-0.5	0.1	0.2	0.1	-0.6	-0.1	0.6	0.1	0.3	-0.1	-0.2	-0.5	-0.1	-0.3
var77	-0.9	1	0.9	0.9	0.9	0.1	0.6	-0.1	-0.9	0.9	0.9	0.8	-0.7	0.8	1	0.3	0.9	0.9	0.7	-0.7	0.1	0.3	0.1	-0.9	-0.6	0	-0.6	0.5	0	0.3	-0.1	-0.6	0.9	0.1	0.7	-0.9	0.1	0	0.9	-0.1	0.1	0.9	0.1	1	0.9	-0.3	-0.6	0.9	-0.2
var78	0.1	-0.3	-0.6	-0.6	-0.6	-0.1	-0.5	0.1	0.1	-0.4	-0.6	-0.7	0.7	-0.7	-0.3	0.8	-0.6	-0.6	-0.3	0.7	-0.1	0.5	0.5	0.1	0.1	0.8	0.5	-0.2	0.8	-0.7	-0.9	-0.1	-0.4	0.5	-0.3	0	-0.6	0.8	-0.6	0.1	0.6	-0.1	-0.6	-0.3	-0.4	0.7	0.5	-0.4	0.3
var79	0.3	-0.5	-0.3	-0.3	-0.3	-0.2	0.3	-0.8	0.3	-0.8	-0.3	-0.6	-0.1	-0.6	-0.5	-0.1	-0.3	-0.3	-0.9	-0.1	-0.2	0.4	-0.7	0.3	0.2	-0.5	-0.3	-0.5	-0.5	0.4	0.2	-0.3	-0.8	-0.7	-0.9	0.3	0.3	-0.5	-0.3	-0.8	-0.7	-0.3	0.3	-0.5	-0.8	-0.4	-0.3	-0.8	-0.6
[truncated: 31 more columns]
