# Supplementary material for: Multi-omics analyses reveal that the gut microbiome and its metabolites promote milk fat synthesis in Zhongdian yak cows
Source: PeerJ journal article supplement (doi:10.7717/peerj.14444), 2022-12-02
Supplement: L__.zip [file correlation_tab.xls]

taxon	var0	var1	var2	var3	var4	var5	var6	var7	var8	var9	var10	var11	var12	var13	var14	var15	var16	var17	var18	var19	var20	var21	var22	var23	var24	var25	var26	var27	var28	var29	var30	var31	var32	var33	var34	var35	var36	var37	var38	var39	var40	var41	var42	var43	var44	var45	var46	var47	var48
var0	1	0.4	0.4	0	-0.1	-0.1	0	-0.4	0.7	-0.1	0	-0.4	0.2	-0.3	0.5	0.1	0.3	0.3	-0.9	0.1	0.1	0.1	-0.3	1	-0.9	-0.1	0.1	0.1	0.1	0	0.3	-0.4	0.6	0.3	-0.9	0.8	0.6	0.1	0.6	0.4	-0.4	-0.3	-0.1	0.6	0.6	-0.1	0.1	-0.1	0
var1	0.4	1	1	0.9	0.8	-0.3	0.9	-0.2	-0.1	-0.7	0.9	-0.2	-0.1	-0.5	0.1	-0.3	0.9	0.9	-0.3	0.2	0	0.2	-0.4	0.4	-0.7	0	0.2	0	-0.3	0.9	0.9	-1	0.3	-0.1	-0.3	0.6	0	-0.3	0.3	-0.5	-1	0.6	0.7	0.3	0.3	0	0.2	0.8	-0.6
var2	0.4	1	1	0.9	0.8	-0.3	0.9	-0.2	-0.1	-0.7	0.9	-0.2	-0.1	-0.5	0.1	-0.3	0.9	0.9	-0.3	0.2	0	0.2	-0.4	0.4	-0.7	0	0.2	0	-0.3	0.9	0.9	-1	0.3	-0.1	-0.3	0.6	0	-0.3	0.3	-0.5	-1	0.6	0.7	0.3	0.3	0	0.2	0.8	-0.6
var3	0	0.9	0.9	1	0.9	-0.1	1	0.1	-0.3	-0.6	1	0.1	-0.3	-0.3	0	-0.4	0.8	0.8	0.1	0.1	0.1	0.1	-0.3	0	-0.4	-0.1	0.1	0.1	-0.4	1	0.8	-0.9	0.1	-0.2	0.1	0.3	-0.4	-0.4	0.1	-0.6	-0.9	0.7	0.9	0.1	0.1	-0.1	0.1	0.9	-0.5
var4	-0.1	0.8	0.8	0.9	1	-0.2	0.9	-0.2	-0.4	-0.8	0.9	-0.2	-0.5	-0.6	0.1	-0.7	0.9	0.9	0.3	0.5	0.2	0.5	-0.6	-0.1	-0.3	-0.2	0.5	0.2	-0.7	0.9	0.9	-0.8	0.3	-0.6	0.3	0.4	-0.3	-0.7	0.3	-0.7	-0.8	0.6	0.7	0.3	0.3	-0.2	0.5	1	-0.6
var5	-0.1	-0.3	-0.3	-0.1	-0.2	1	-0.1	0.7	0.6	0.7	-0.1	0.7	-0.6	0.6	0.6	-0.2	-0.4	-0.4	0.3	-0.3	0.8	-0.3	0	-0.1	0	-0.8	-0.3	0.8	-0.2	-0.1	-0.4	0.3	0.2	0.1	0.3	-0.1	-0.7	-0.2	0.2	0.7	0.3	-0.6	0.3	0.2	0.2	-0.8	-0.3	-0.2	0.9
var6	0	0.9	0.9	1	0.9	-0.1	1	0.1	-0.3	-0.6	1	0.1	-0.3	-0.3	0	-0.4	0.8	0.8	0.1	0.1	0.1	0.1	-0.3	0	-0.4	-0.1	0.1	0.1	-0.4	1	0.8	-0.9	0.1	-0.2	0.1	0.3	-0.4	-0.4	0.1	-0.6	-0.9	0.7	0.9	0.1	0.1	-0.1	0.1	0.9	-0.5
var7	-0.4	-0.2	-0.2	0.1	-0.2	0.7	0.1	1	0.1	0.7	0.1	1	-0.1	0.9	-0.1	0.3	-0.5	-0.5	0.3	-0.8	0.2	-0.8	0.6	-0.4	0.3	-0.2	-0.8	0.2	0.3	0.1	-0.5	0.2	-0.5	0.5	0.3	-0.6	-0.8	0.3	-0.5	0.3	0.2	0	0.5	-0.5	-0.5	-0.2	-0.8	-0.2	0.6
var8	0.7	-0.1	-0.1	-0.3	-0.4	0.6	-0.3	0.1	1	0.5	-0.3	0.1	-0.2	0.2	0.8	0	-0.2	-0.2	-0.5	-0.1	0.6	-0.1	-0.2	0.7	-0.6	-0.6	-0.1	0.6	0	-0.3	-0.2	0.1	0.6	0.3	-0.5	0.5	0.1	0	0.6	0.9	0.1	-0.8	-0.1	0.6	0.6	-0.6	-0.1	-0.4	0.7
var9	-0.1	-0.7	-0.7	-0.6	-0.8	0.7	-0.6	0.7	0.5	1	-0.6	0.7	0.1	0.9	0.1	0.5	-0.9	-0.9	0	-0.7	0.2	-0.7	0.6	-0.1	0.3	-0.2	-0.7	0.2	0.5	-0.6	-0.9	0.7	-0.3	0.6	0	-0.5	-0.3	0.5	-0.3	0.8	0.7	-0.6	-0.2	-0.3	-0.3	-0.2	-0.7	-0.8	0.9
var10	0	0.9	0.9	1	0.9	-0.1	1	0.1	-0.3	-0.6	1	0.1	-0.3	-0.3	0	-0.4	0.8	0.8	0.1	0.1	0.1	0.1	-0.3	0	-0.4	-0.1	0.1	0.1	-0.4	1	0.8	-0.9	0.1	-0.2	0.1	0.3	-0.4	-0.4	0.1	-0.6	-0.9	0.7	0.9	0.1	0.1	-0.1	0.1	0.9	-0.5
var11	-0.4	-0.2	-0.2	0.1	-0.2	0.7	0.1	1	0.1	0.7	0.1	1	-0.1	0.9	-0.1	0.3	-0.5	-0.5	0.3	-0.8	0.2	-0.8	0.6	-0.4	0.3	-0.2	-0.8	0.2	0.3	0.1	-0.5	0.2	-0.5	0.5	0.3	-0.6	-0.8	0.3	-0.5	0.3	0.2	0	0.5	-0.5	-0.5	-0.2	-0.8	-0.2	0.6
var12	0.2	-0.1	-0.1	-0.3	-0.5	-0.6	-0.3	-0.1	-0.2	0.1	-0.3	-0.1	1	0.2	-0.7	0.9	-0.3	-0.3	-0.6	-0.5	-0.9	-0.5	0.7	0.2	0.1	0.9	-0.5	-0.9	0.9	-0.3	-0.3	0.1	-0.6	0.7	-0.6	-0.3	0.6	0.9	-0.6	-0.1	0.1	0.3	-0.4	-0.6	-0.6	0.9	-0.5	-0.5	-0.3
var13	-0.3	-0.5	-0.5	-0.3	-0.6	0.6	-0.3	0.9	0.2	0.9	-0.3	0.9	0.2	1	-0.2	0.6	-0.8	-0.8	0.1	-0.9	0	-0.9	0.8	-0.3	0.4	0	-0.9	0	0.6	-0.3	-0.8	0.5	-0.6	0.7	0.1	-0.7	-0.5	0.6	-0.6	0.5	0.5	-0.2	0.1	-0.6	-0.6	0	-0.9	-0.6	0.7
var14	0.5	0.1	0.1	0	0.1	0.6	0	-0.1	0.8	0.1	0	-0.1	-0.7	-0.2	1	-0.6	0.2	0.2	-0.1	0.4	0.9	0.4	-0.7	0.5	-0.6	-0.9	0.4	0.9	-0.6	0	0.2	-0.1	0.9	-0.3	-0.1	0.7	-0.1	-0.6	0.9	0.6	-0.1	-0.7	0.1	0.9	0.9	-0.9	0.4	0.1	0.5
var15	0.1	-0.3	-0.3	-0.4	-0.7	-0.2	-0.4	0.3	0	0.5	-0.4	0.3	0.9	0.6	-0.6	1	-0.6	-0.6	-0.5	-0.8	-0.7	-0.8	0.9	0.1	0.2	0.7	-0.8	-0.7	1	-0.4	-0.6	0.3	-0.7	0.9	-0.5	-0.5	0.3	1	-0.7	0.2	0.3	0.1	-0.3	-0.7	-0.7	0.7	-0.8	-0.7	0.1
var16	0.3	0.9	0.9	0.8	0.9	-0.4	0.8	-0.5	-0.2	-0.9	0.8	-0.5	-0.3	-0.8	0.2	-0.6	1	1	-0.1	0.6	0.1	0.6	-0.7	0.3	-0.6	-0.1	0.6	0.1	-0.6	0.8	1	-0.9	0.5	-0.5	-0.1	0.7	0.1	-0.6	0.5	-0.6	-0.9	0.5	0.5	0.5	0.5	-0.1	0.6	0.9	-0.7
var17	0.3	0.9	0.9	0.8	0.9	-0.4	0.8	-0.5	-0.2	-0.9	0.8	-0.5	-0.3	-0.8	0.2	-0.6	1	1	-0.1	0.6	0.1	0.6	-0.7	0.3	-0.6	-0.1	0.6	0.1	-0.6	0.8	1	-0.9	0.5	-0.5	-0.1	0.7	0.1	-0.6	0.5	-0.6	-0.9	0.5	0.5	0.5	0.5	-0.1	0.6	0.9	-0.7
var18	-0.9	-0.3	-0.3	0.1	0.3	0.3	0.1	0.3	-0.5	0	0.1	0.3	-0.6	0.1	-0.1	-0.5	-0.1	-0.1	1	0.2	0.3	0.2	-0.1	-0.9	0.7	-0.3	0.2	0.3	-0.5	0.1	-0.1	0.3	-0.2	-0.6	1	-0.5	-0.7	-0.5	-0.2	-0.3	0.3	0.1	0.2	-0.2	-0.2	-0.3	0.2	0.3	0.1
var19	0.1	0.2	0.2	0.1	0.5	-0.3	0.1	-0.8	-0.1	-0.7	0.1	-0.8	-0.5	-0.9	0.4	-0.8	0.6	0.6	0.2	1	0.3	1	-0.9	0.1	-0.2	-0.3	1	0.3	-0.8	0.1	0.6	-0.2	0.7	-0.9	0.2	0.6	0.3	-0.8	0.7	-0.3	-0.2	-0.1	-0.2	0.7	0.7	-0.3	1	0.5	-0.4
var20	0.1	0	0	0.1	0.2	0.8	0.1	0.2	0.6	0.2	0.1	0.2	-0.9	0	0.9	-0.7	0.1	0.1	0.3	0.3	1	0.3	-0.6	0.1	-0.3	-1	0.3	1	-0.7	0.1	0.1	0	0.7	-0.4	0.3	0.4	-0.5	-0.7	0.7	0.5	0	-0.6	0.3	0.7	0.7	-1	0.3	0.2	0.6
var21	0.1	0.2	0.2	0.1	0.5	-0.3	0.1	-0.8	-0.1	-0.7	0.1	-0.8	-0.5	-0.9	0.4	-0.8	0.6	0.6	0.2	1	0.3	1	-0.9	0.1	-0.2	-0.3	1	0.3	-0.8	0.1	0.6	-0.2	0.7	-0.9	0.2	0.6	0.3	-0.8	0.7	-0.3	-0.2	-0.1	-0.2	0.7	0.7	-0.3	1	0.5	-0.4
var22	-0.3	-0.4	-0.4	-0.3	-0.6	0	-0.3	0.6	-0.2	0.6	-0.3	0.6	0.7	0.8	-0.7	0.9	-0.7	-0.7	-0.1	-0.9	-0.6	-0.9	1	-0.3	0.5	0.6	-0.9	-0.6	0.9	-0.3	-0.7	0.4	-0.9	0.8	-0.1	-0.8	-0.1	0.9	-0.9	0.1	0.4	0.2	-0.1	-0.9	-0.9	0.6	-0.9	-0.6	0.2
var23	1	0.4	0.4	0	-0.1	-0.1	0	-0.4	0.7	-0.1	0	-0.4	0.2	-0.3	0.5	0.1	0.3	0.3	-0.9	0.1	0.1	0.1	-0.3	1	-0.9	-0.1	0.1	0.1	0.1	0	0.3	-0.4	0.6	0.3	-0.9	0.8	0.6	0.1	0.6	0.4	-0.4	-0.3	-0.1	0.6	0.6	-0.1	0.1	-0.1	0
var24	-0.9	-0.7	-0.7	-0.4	-0.3	0	-0.4	0.3	-0.6	0.3	-0.4	0.3	0.1	0.4	-0.6	0.2	-0.6	-0.6	0.7	-0.2	-0.3	-0.2	0.5	-0.9	1	0.3	-0.2	-0.3	0.2	-0.4	-0.6	0.7	-0.7	-0.1	0.7	-0.9	-0.3	0.2	-0.7	-0.2	0.7	0.1	-0.3	-0.7	-0.7	0.3	-0.2	-0.3	0.1
var25	-0.1	0	0	-0.1	-0.2	-0.8	-0.1	-0.2	-0.6	-0.2	-0.1	-0.2	0.9	0	-0.9	0.7	-0.1	-0.1	-0.3	-0.3	-1	-0.3	0.6	-0.1	0.3	1	-0.3	-1	0.7	-0.1	-0.1	0	-0.7	0.4	-0.3	-0.4	0.5	0.7	-0.7	-0.5	0	0.6	-0.3	-0.7	-0.7	1	-0.3	-0.2	-0.6
var26	0.1	0.2	0.2	0.1	0.5	-0.3	0.1	-0.8	-0.1	-0.7	0.1	-0.8	-0.5	-0.9	0.4	-0.8	0.6	0.6	0.2	1	0.3	1	-0.9	0.1	-0.2	-0.3	1	0.3	-0.8	0.1	0.6	-0.2	0.7	-0.9	0.2	0.6	0.3	-0.8	0.7	-0.3	-0.2	-0.1	-0.2	0.7	0.7	-0.3	1	0.5	-0.4
var27	0.1	0	0	0.1	0.2	0.8	0.1	0.2	0.6	0.2	0.1	0.2	-0.9	0	0.9	-0.7	0.1	0.1	0.3	0.3	1	0.3	-0.6	0.1	-0.3	-1	0.3	1	-0.7	0.1	0.1	0	0.7	-0.4	0.3	0.4	-0.5	-0.7	0.7	0.5	0	-0.6	0.3	0.7	0.7	-1	0.3	0.2	0.6
var28	0.1	-0.3	-0.3	-0.4	-0.7	-0.2	-0.4	0.3	0	0.5	-0.4	0.3	0.9	0.6	-0.6	1	-0.6	-0.6	-0.5	-0.8	-0.7	-0.8	0.9	0.1	0.2	0.7	-0.8	-0.7	1	-0.4	-0.6	0.3	-0.7	0.9	-0.5	-0.5	0.3	1	-0.7	0.2	0.3	0.1	-0.3	-0.7	-0.7	0.7	-0.8	-0.7	0.1
var29	0	0.9	0.9	1	0.9	-0.1	1	0.1	-0.3	-0.6	1	0.1	-0.3	-0.3	0	-0.4	0.8	0.8	0.1	0.1	0.1	0.1	-0.3	0	-0.4	-0.1	0.1	0.1	-0.4	1	0.8	-0.9	0.1	-0.2	0.1	0.3	-0.4	-0.4	0.1	-0.6	-0.9	0.7	0.9	0.1	0.1	-0.1	0.1	0.9	-0.5
var30	0.3	0.9	0.9	0.8	0.9	-0.4	0.8	-0.5	-0.2	-0.9	0.8	-0.5	-0.3	-0.8	0.2	-0.6	1	1	-0.1	0.6	0.1	0.6	-0.7	0.3	-0.6	-0.1	0.6	0.1	-0.6	0.8	1	-0.9	0.5	-0.5	-0.1	0.7	0.1	-0.6	0.5	-0.6	-0.9	0.5	0.5	0.5	0.5	-0.1	0.6	0.9	-0.7
var31	-0.4	-1	-1	-0.9	-0.8	0.3	-0.9	0.2	0.1	0.7	-0.9	0.2	0.1	0.5	-0.1	0.3	-0.9	-0.9	0.3	-0.2	0	-0.2	0.4	-0.4	0.7	0	-0.2	0	0.3	-0.9	-0.9	1	-0.3	0.1	0.3	-0.6	0	0.3	-0.3	0.5	1	-0.6	-0.7	-0.3	-0.3	0	-0.2	-0.8	0.6
var32	0.6	0.3	0.3	0.1	0.3	0.2	0.1	-0.5	0.6	-0.3	0.1	-0.5	-0.6	-0.6	0.9	-0.7	0.5	0.5	-0.2	0.7	0.7	0.7	-0.9	0.6	-0.7	-0.7	0.7	0.7	-0.7	0.1	0.5	-0.3	1	-0.5	-0.2	0.9	0.2	-0.7	1	0.3	-0.3	-0.5	0	1	1	-0.7	0.7	0.3	0.1
var33	0.3	-0.1	-0.1	-0.2	-0.6	0.1	-0.2	0.5	0.3	0.6	-0.2	0.5	0.7	0.7	-0.3	0.9	-0.5	-0.5	-0.6	-0.9	-0.4	-0.9	0.8	0.3	-0.1	0.4	-0.9	-0.4	0.9	-0.2	-0.5	0.1	-0.5	1	-0.6	-0.3	0.1	0.9	-0.5	0.4	0.1	0	0	-0.5	-0.5	0.4	-0.9	-0.6	0.3
var34	-0.9	-0.3	-0.3	0.1	0.3	0.3	0.1	0.3	-0.5	0	0.1	0.3	-0.6	0.1	-0.1	-0.5	-0.1	-0.1	1	0.2	0.3	0.2	-0.1	-0.9	0.7	-0.3	0.2	0.3	-0.5	0.1	-0.1	0.3	-0.2	-0.6	1	-0.5	-0.7	-0.5	-0.2	-0.3	0.3	0.1	0.2	-0.2	-0.2	-0.3	0.2	0.3	0.1
var35	0.8	0.6	0.6	0.3	0.4	-0.1	0.3	-0.6	0.5	-0.5	0.3	-0.6	-0.3	-0.7	0.7	-0.5	0.7	0.7	-0.5	0.6	0.4	0.6	-0.8	0.8	-0.9	-0.4	0.6	0.4	-0.5	0.3	0.7	-0.6	0.9	-0.3	-0.5	1	0.4	-0.5	0.9	0.1	-0.6	-0.2	0.1	0.9	0.9	-0.4	0.6	0.4	-0.2
var36	0.6	0	0	-0.4	-0.3	-0.7	-0.4	-0.8	0.1	-0.3	-0.4	-0.8	0.6	-0.5	-0.1	0.3	0.1	0.1	-0.7	0.3	-0.5	0.3	-0.1	0.6	-0.3	0.5	0.3	-0.5	0.3	-0.4	0.1	0	0.2	0.1	-0.7	0.4	1	0.3	0.2	0	0	-0.1	-0.7	0.2	0.2	0.5	0.3	-0.3	-0.4
var37	0.1	-0.3	-0.3	-0.4	-0.7	-0.2	-0.4	0.3	0	0.5	-0.4	0.3	0.9	0.6	-0.6	1	-0.6	-0.6	-0.5	-0.8	-0.7	-0.8	0.9	0.1	0.2	0.7	-0.8	-0.7	1	-0.4	-0.6	0.3	-0.7	0.9	-0.5	-0.5	0.3	1	-0.7	0.2	0.3	0.1	-0.3	-0.7	-0.7	0.7	-0.8	-0.7	0.1
var38	0.6	0.3	0.3	0.1	0.3	0.2	0.1	-0.5	0.6	-0.3	0.1	-0.5	-0.6	-0.6	0.9	-0.7	0.5	0.5	-0.2	0.7	0.7	0.7	-0.9	0.6	-0.7	-0.7	0.7	0.7	-0.7	0.1	0.5	-0.3	1	-0.5	-0.2	0.9	0.2	-0.7	1	0.3	-0.3	-0.5	0	1	1	-0.7	0.7	0.3	0.1
var39	0.4	-0.5	-0.5	-0.6	-0.7	0.7	-0.6	0.3	0.9	0.8	-0.6	0.3	-0.1	0.5	0.6	0.2	-0.6	-0.6	-0.3	-0.3	0.5	-0.3	0.1	0.4	-0.2	-0.5	-0.3	0.5	0.2	-0.6	-0.6	0.5	0.3	0.4	-0.3	0.1	0	0.2	0.3	1	0.5	-0.9	-0.3	0.3	0.3	-0.5	-0.3	-0.7	0.9
var40	-0.4	-1	-1	-0.9	-0.8	0.3	-0.9	0.2	0.1	0.7	-0.9	0.2	0.1	0.5	-0.1	0.3	-0.9	-0.9	0.3	-0.2	0	-0.2	0.4	-0.4	0.7	0	-0.2	0	0.3	-0.9	-0.9	1	-0.3	0.1	0.3	-0.6	0	0.3	-0.3	0.5	1	-0.6	-0.7	-0.3	-0.3	0	-0.2	-0.8	0.6
var41	-0.3	0.6	0.6	0.7	0.6	-0.6	0.7	0	-0.8	-0.6	0.7	0	0.3	-0.2	-0.7	0.1	0.5	0.5	0.1	-0.1	-0.6	-0.1	0.2	-0.3	0.1	0.6	-0.1	-0.6	0.1	0.7	0.5	-0.6	-0.5	0	0.1	-0.2	-0.1	0.1	-0.5	-0.9	-0.6	1	0.5	-0.5	-0.5	0.6	-0.1	0.6	-0.8
var42	-0.1	0.7	0.7	0.9	0.7	0.3	0.9	0.5	-0.1	-0.2	0.9	0.5	-0.4	0.1	0.1	-0.3	0.5	0.5	0.2	-0.2	0.3	-0.2	-0.1	-0.1	-0.3	-0.3	-0.2	0.3	-0.3	0.9	0.5	-0.7	0	0	0.2	0.1	-0.7	-0.3	0	-0.3	-0.7	0.5	1	0	0	-0.3	-0.2	0.7	-0.1
var43	0.6	0.3	0.3	0.1	0.3	0.2	0.1	-0.5	0.6	-0.3	0.1	-0.5	-0.6	-0.6	0.9	-0.7	0.5	0.5	-0.2	0.7	0.7	0.7	-0.9	0.6	-0.7	-0.7	0.7	0.7	-0.7	0.1	0.5	-0.3	1	-0.5	-0.2	0.9	0.2	-0.7	1	0.3	-0.3	-0.5	0	1	1	-0.7	0.7	0.3	0.1
var44	0.6	0.3	0.3	0.1	0.3	0.2	0.1	-0.5	0.6	-0.3	0.1	-0.5	-0.6	-0.6	0.9	-0.7	0.5	0.5	-0.2	0.7	0.7	0.7	-0.9	0.6	-0.7	-0.7	0.7	0.7	-0.7	0.1	0.5	-0.3	1	-0.5	-0.2	0.9	0.2	-0.7	1	0.3	-0.3	-0.5	0	1	1	-0.7	0.7	0.3	0.1
var45	-0.1	0	0	-0.1	-0.2	-0.8	-0.1	-0.2	-0.6	-0.2	-0.1	-0.2	0.9	0	-0.9	0.7	-0.1	-0.1	-0.3	-0.3	-1	-0.3	0.6	-0.1	0.3	1	-0.3	-1	0.7	-0.1	-0.1	0	-0.7	0.4	-0.3	-0.4	0.5	0.7	-0.7	-0.5	0	0.6	-0.3	-0.7	-0.7	1	-0.3	-0.2	-0.6
var46	0.1	0.2	0.2	0.1	0.5	-0.3	0.1	-0.8	-0.1	-0.7	0.1	-0.8	-0.5	-0.9	0.4	-0.8	0.6	0.6	0.2	1	0.3	1	-0.9	0.1	-0.2	-0.3	1	0.3	-0.8	0.1	0.6	-0.2	0.7	-0.9	0.2	0.6	0.3	-0.8	0.7	-0.3	-0.2	-0.1	-0.2	0.7	0.7	-0.3	1	0.5	-0.4
var47	-0.1	0.8	0.8	0.9	1	-0.2	0.9	-0.2	-0.4	-0.8	0.9	-0.2	-0.5	-0.6	0.1	-0.7	0.9	0.9	0.3	0.5	0.2	0.5	-0.6	-0.1	-0.3	-0.2	0.5	0.2	-0.7	0.9	0.9	-0.8	0.3	-0.6	0.3	0.4	-0.3	-0.7	0.3	-0.7	-0.8	0.6	0.7	0.3	0.3	-0.2	0.5	1	-0.6
var48	0	-0.6	-0.6	-0.5	-0.6	0.9	-0.5	0.6	0.7	0.9	-0.5	0.6	-0.3	0.7	0.5	0.1	-0.7	-0.7	0.1	-0.4	0.6	-0.4	0.2	0	0.1	-0.6	-0.4	0.6	0.1	-0.5	-0.7	0.6	0.1	0.3	0.1	-0.2	-0.4	0.1	0.1	0.9	0.6	-0.8	-0.1	0.1	0.1	-0.6	-0.4	-0.6	1
var49	0.2	-0.1	-0.1	-0.3	0.1	-0.4	-0.3	-0.9	0	-0.5	-0.3	-0.9	-0.2	-0.8	0.3	-0.5	0.3	0.3	0	0.9	0.1	0.9	-0.7	0.2	-0.1	-0.1	0.9	0.1	-0.5	-0.3	0.3	0.1	0.6	-0.7	0	0.5	0.6	-0.5	0.6	-0.1	0.1	-0.3	-0.6	0.6	0.6	-0.1	0.9	0.1	-0.3
var50	0.3	0.9	0.9	0.8	0.9	-0.4	0.8	-0.5	-0.2	-0.9	0.8	-0.5	-0.3	-0.8	0.2	-0.6	1	1	-0.1	0.6	0.1	0.6	-0.7	0.3	-0.6	-0.1	0.6	0.1	-0.6	0.8	1	-0.9	0.5	-0.5	-0.1	0.7	0.1	-0.6	0.5	-0.6	-0.9	0.5	0.5	0.5	0.5	-0.1	0.6	0.9	-0.7
var51	0.1	0	0	0.1	0.2	0.8	0.1	0.2	0.6	0.2	0.1	0.2	-0.9	0	0.9	-0.7	0.1	0.1	0.3	0.3	1	0.3	-0.6	0.1	-0.3	-1	0.3	1	-0.7	0.1	0.1	0	0.7	-0.4	0.3	0.4	-0.5	-0.7	0.7	0.5	0	-0.6	0.3	0.7	0.7	-1	0.3	0.2	0.6
var52	0	0.9	0.9	1	0.9	-0.1	1	0.1	-0.3	-0.6	1	0.1	-0.3	-0.3	0	-0.4	0.8	0.8	0.1	0.1	0.1	0.1	-0.3	0	-0.4	-0.1	0.1	0.1	-0.4	1	0.8	-0.9	0.1	-0.2	0.1	0.3	-0.4	-0.4	0.1	-0.6	-0.9	0.7	0.9	0.1	0.1	-0.1	0.1	0.9	-0.5
var53	-0.1	0	0	-0.1	-0.2	-0.8	-0.1	-0.2	-0.6	-0.2	-0.1	-0.2	0.9	0	-0.9	0.7	-0.1	-0.1	-0.3	-0.3	-1	-0.3	0.6	-0.1	0.3	1	-0.3	-1	0.7	-0.1	-0.1	0	-0.7	0.4	-0.3	-0.4	0.5	0.7	-0.7	-0.5	0	0.6	-0.3	-0.7	-0.7	1	-0.3	-0.2	-0.6
var54	0.3	0.4	0.4	0.3	0.6	0	0.3	-0.6	0.2	-0.6	0.3	-0.6	-0.7	-0.8	0.7	-0.9	0.7	0.7	0.1	0.9	0.6	0.9	-1	0.3	-0.5	-0.6	0.9	0.6	-0.9	0.3	0.7	-0.4	0.9	-0.8	0.1	0.8	0.1	-0.9	0.9	-0.1	-0.4	-0.2	0.1	0.9	0.9	-0.6	0.9	0.6	-0.2
var55	-0.3	-0.9	-0.9	-0.8	-0.9	0.4	-0.8	0.5	0.2	0.9	-0.8	0.5	0.3	0.8	-0.2	0.6	-1	-1	0.1	-0.6	-0.1	-0.6	0.7	-0.3	0.6	0.1	-0.6	-0.1	0.6	-0.8	-1	0.9	-0.5	0.5	0.1	-0.7	-0.1	0.6	-0.5	0.6	0.9	-0.5	-0.5	-0.5	-0.5	0.1	-0.6	-0.9	0.7
var56	-0.3	-0.5	-0.5	-0.3	-0.6	0.6	-0.3	0.9	0.2	0.9	-0.3	0.9	0.2	1	-0.2	0.6	-0.8	-0.8	0.1	-0.9	0	-0.9	0.8	-0.3	0.4	0	-0.9	0	0.6	-0.3	-0.8	0.5	-0.6	0.7	0.1	-0.7	-0.5	0.6	-0.6	0.5	0.5	-0.2	0.1	-0.6	-0.6	0	-0.9	-0.6	0.7
var57	0.3	0.9	0.9	0.8	0.6	-0.5	0.8	-0.1	-0.3	-0.6	0.8	-0.1	0.3	-0.3	-0.3	0.1	0.7	0.7	-0.4	-0.1	-0.4	-0.1	0	0.3	-0.5	0.4	-0.1	-0.4	0.1	0.8	0.7	-0.9	-0.1	0.2	-0.4	0.3	0.1	0.1	-0.1	-0.6	-0.9	0.8	0.6	-0.1	-0.1	0.4	-0.1	0.6	-0.7
var58	0.3	0.9	0.9	0.8	0.9	-0.4	0.8	-0.5	-0.2	-0.9	0.8	-0.5	-0.3	-0.8	0.2	-0.6	1	1	-0.1	0.6	0.1	0.6	-0.7	0.3	-0.6	-0.1	0.6	0.1	-0.6	0.8	1	-0.9	0.5	-0.5	-0.1	0.7	0.1	-0.6	0.5	-0.6	-0.9	0.5	0.5	0.5	0.5	-0.1	0.6	0.9	-0.7
var59	-0.1	-0.7	-0.7	-0.6	-0.8	0.7	-0.6	0.7	0.5	1	-0.6	0.7	0.1	0.9	0.1	0.5	-0.9	-0.9	0	-0.7	0.2	-0.7	0.6	-0.1	0.3	-0.2	-0.7	0.2	0.5	-0.6	-0.9	0.7	-0.3	0.6	0	-0.5	-0.3	0.5	-0.3	0.8	0.7	-0.6	-0.2	-0.3	-0.3	-0.2	-0.7	-0.8	0.9
var60	0.4	0.2	0.2	-0.1	0.2	-0.7	-0.1	-1	-0.1	-0.7	-0.1	-1	0.1	-0.9	0.1	-0.3	0.5	0.5	-0.3	0.8	-0.2	0.8	-0.6	0.4	-0.3	0.2	0.8	-0.2	-0.3	-0.1	0.5	-0.2	0.5	-0.5	-0.3	0.6	0.8	-0.3	0.5	-0.3	-0.2	0	-0.5	0.5	0.5	0.2	0.8	0.2	-0.6
var61	-0.3	-0.9	-0.9	-0.8	-0.6	0.5	-0.8	0.1	0.3	0.6	-0.8	0.1	-0.3	0.3	0.3	-0.1	-0.7	-0.7	0.4	0.1	0.4	0.1	0	-0.3	0.5	-0.4	0.1	0.4	-0.1	-0.8	-0.7	0.9	0.1	-0.2	0.4	-0.3	-0.1	-0.1	0.1	0.6	0.9	-0.8	-0.6	0.1	0.1	-0.4	0.1	-0.6	0.7
var62	-0.3	-0.9	-0.9	-0.8	-0.9	0.4	-0.8	0.5	0.2	0.9	-0.8	0.5	0.3	0.8	-0.2	0.6	-1	-1	0.1	-0.6	-0.1	-0.6	0.7	-0.3	0.6	0.1	-0.6	-0.1	0.6	-0.8	-1	0.9	-0.5	0.5	0.1	-0.7	-0.1	0.6	-0.5	0.6	0.9	-0.5	-0.5	-0.5	-0.5	0.1	-0.6	-0.9	0.7
var63	0.3	0.4	0.4	0.3	0.6	0	0.3	-0.6	0.2	-0.6	0.3	-0.6	-0.7	-0.8	0.7	-0.9	0.7	0.7	0.1	0.9	0.6	0.9	-1	0.3	-0.5	-0.6	0.9	0.6	-0.9	0.3	0.7	-0.4	0.9	-0.8	0.1	0.8	0.1	-0.9	0.9	-0.1	-0.4	-0.2	0.1	0.9	0.9	-0.6	0.9	0.6	-0.2
var64	-0.9	-0.2	-0.2	0.1	0.3	-0.3	0.1	0	-0.9	-0.3	0.1	0	-0.1	-0.1	-0.6	-0.2	0	0	0.8	0.2	-0.3	0.2	0.1	-0.9	0.8	0.3	0.2	-0.3	-0.2	0.1	0	0.2	-0.5	-0.5	0.8	-0.6	-0.3	-0.2	-0.5	-0.7	0.2	0.5	0	-0.5	-0.5	0.3	0.2	0.3	-0.4
var65	-0.2	-0.4	-0.4	-0.2	-0.1	0.9	-0.2	0.4	0.5	0.5	-0.2	0.4	-0.8	0.3	0.7	-0.5	-0.3	-0.3	0.5	0.1	0.9	0.1	-0.3	-0.2	0.1	-0.9	0.1	0.9	-0.5	-0.2	-0.3	0.4	0.4	-0.3	0.5	0	-0.6	-0.5	0.4	0.6	0.4	-0.7	0.1	0.4	0.4	-0.9	0.1	-0.1	0.8
var66	0.2	-0.1	-0.1	-0.3	0.1	-0.4	-0.3	-0.9	0	-0.5	-0.3	-0.9	-0.2	-0.8	0.3	-0.5	0.3	0.3	0	0.9	0.1	0.9	-0.7	0.2	-0.1	-0.1	0.9	0.1	-0.5	-0.3	0.3	0.1	0.6	-0.7	0	0.5	0.6	-0.5	0.6	-0.1	0.1	-0.3	-0.6	0.6	0.6	-0.1	0.9	0.1	-0.3
var67	0	0.9	0.9	1	0.9	-0.1	1	0.1	-0.3	-0.6	1	0.1	-0.3	-0.3	0	-0.4	0.8	0.8	0.1	0.1	0.1	0.1	-0.3	0	-0.4	-0.1	0.1	0.1	-0.4	1	0.8	-0.9	0.1	-0.2	0.1	0.3	-0.4	-0.4	0.1	-0.6	-0.9	0.7	0.9	0.1	0.1	-0.1	0.1	0.9	-0.5
var68	0.1	0.2	0.2	0.1	0.5	-0.3	0.1	-0.8	-0.1	-0.7	0.1	-0.8	-0.5	-0.9	0.4	-0.8	0.6	0.6	0.2	1	0.3	1	-0.9	0.1	-0.2	-0.3	1	0.3	-0.8	0.1	0.6	-0.2	0.7	-0.9	0.2	0.6	0.3	-0.8	0.7	-0.3	-0.2	-0.1	-0.2	0.7	0.7	-0.3	1	0.5	-0.4
var69	-0.4	-1	-1	-0.9	-0.8	0.3	-0.9	0.2	0.1	0.7	-0.9	0.2	0.1	0.5	-0.1	0.3	-0.9	-0.9	0.3	-0.2	0	-0.2	0.4	-0.4	0.7	0	-0.2	0	0.3	-0.9	-0.9	1	-0.3	0.1	0.3	-0.6	0	0.3	-0.3	0.5	1	-0.6	-0.7	-0.3	-0.3	0	-0.2	-0.8	0.6
var70	0.1	0.7	0.7	0.6	0.5	-0.8	0.6	-0.3	-0.6	-0.7	0.6	-0.3	0.5	-0.4	-0.6	0.2	0.6	0.6	-0.3	0	-0.7	0	0.1	0.1	-0.2	0.7	0	-0.7	0.2	0.6	0.6	-0.7	-0.3	0.1	-0.3	0.1	0.3	0.2	-0.3	-0.8	-0.7	0.9	0.3	-0.3	-0.3	0.7	0	0.5	-0.9
var71	0.2	-0.1	-0.1	-0.3	-0.5	-0.6	-0.3	-0.1	-0.2	0.1	-0.3	-0.1	1	0.2	-0.7	0.9	-0.3	-0.3	-0.6	-0.5	-0.9	-0.5	0.7	0.2	0.1	0.9	-0.5	-0.9	0.9	-0.3	-0.3	0.1	-0.6	0.7	-0.6	-0.3	0.6	0.9	-0.6	-0.1	0.1	0.3	-0.4	-0.6	-0.6	0.9	-0.5	-0.5	-0.3
var72	0.4	1	1	0.9	0.8	-0.3	0.9	-0.2	-0.1	-0.7	0.9	-0.2	-0.1	-0.5	0.1	-0.3	0.9	0.9	-0.3	0.2	0	0.2	-0.4	0.4	-0.7	0	0.2	0	-0.3	0.9	0.9	-1	0.3	-0.1	-0.3	0.6	0	-0.3	0.3	-0.5	-1	0.6	0.7	0.3	0.3	0	0.2	0.8	-0.6
var73	0.6	0.8	0.8	0.6	0.3	-0.3	0.6	0	0.1	-0.3	0.6	0	0.4	-0.1	-0.1	0.3	0.5	0.5	-0.7	-0.3	-0.3	-0.3	0.1	0.6	-0.7	0.3	-0.3	-0.3	0.3	0.6	0.5	-0.8	0	0.5	-0.7	0.4	0.2	0.3	0	-0.2	-0.8	0.5	0.5	0	0	0.3	-0.3	0.3	-0.4
var74	0.2	-0.1	-0.1	-0.3	0.1	-0.4	-0.3	-0.9	0	-0.5	-0.3	-0.9	-0.2	-0.8	0.3	-0.5	0.3	0.3	0	0.9	0.1	0.9	-0.7	0.2	-0.1	-0.1	0.9	0.1	-0.5	-0.3	0.3	0.1	0.6	-0.7	0	0.5	0.6	-0.5	0.6	-0.1	0.1	-0.3	-0.6	0.6	0.6	-0.1	0.9	0.1	-0.3
var75	-0.8	-0.1	-0.1	0.2	0.5	-0.1	0.2	-0.1	-0.7	-0.4	0.2	-0.1	-0.5	-0.3	-0.2	-0.6	0.2	0.2	0.9	0.5	0.1	0.5	-0.3	-0.8	0.6	-0.1	0.5	0.1	-0.6	0.2	0.2	0.1	-0.1	-0.8	0.9	-0.3	-0.4	-0.6	-0.1	-0.6	0.1	0.3	0.1	-0.1	-0.1	-0.1	0.5	0.5	-0.3
var76	0.1	0.2	0.2	0.1	0.5	-0.3	0.1	-0.8	-0.1	-0.7	0.1	-0.8	-0.5	-0.9	0.4	-0.8	0.6	0.6	0.2	1	0.3	1	-0.9	0.1	-0.2	-0.3	1	0.3	-0.8	0.1	0.6	-0.2	0.7	-0.9	0.2	0.6	0.3	-0.8	0.7	-0.3	-0.2	-0.1	-0.2	0.7	0.7	-0.3	1	0.5	-0.4
var77	0.6	0.3	0.3	0.1	0.3	0.2	0.1	-0.5	0.6	-0.3	0.1	-0.5	-0.6	-0.6	0.9	-0.7	0.5	0.5	-0.2	0.7	0.7	0.7	-0.9	0.6	-0.7	-0.7	0.7	0.7	-0.7	0.1	0.5	-0.3	1	-0.5	-0.2	0.9	0.2	-0.7	1	0.3	-0.3	-0.5	0	1	1	-0.7	0.7	0.3	0.1
var78	-0.1	0	0	-0.1	-0.2	-0.8	-0.1	-0.2	-0.6	-0.2	-0.1	-0.2	0.9	0	-0.9	0.7	-0.1	-0.1	-0.3	-0.3	-1	-0.3	0.6	-0.1	0.3	1	-0.3	-1	0.7	-0.1	-0.1	0	-0.7	0.4	-0.3	-0.4	0.5	0.7	-0.7	-0.5	0	0.6	-0.3	-0.7	-0.7	1	-0.3	-0.2	-0.6
var79	0.3	-0.6	-0.6	-0.7	-0.9	0.5	-0.7	0.4	0.7	0.9	-0.7	0.4	0.3	0.7	0.2	0.6	-0.8	-0.8	-0.4	-0.6	0.1	-0.6	0.5	0.3	0	-0.1	-0.6	0.1	0.6	-0.7	-0.8	0.6	-0.1	0.7	-0.4	-0.2	0.1	0.6	-0.1	0.9	0.6	-0.7	-0.4	-0.1	-0.1	-0.1	-0.6	-0.9	0.8
[truncated: 31 more columns]
