# Supplementary material for: Multi-omics analyses reveal that the gut microbiome and its metabolites promote milk fat synthesis in Zhongdian yak cows
Source: PeerJ journal article supplement (doi:10.7717/peerj.14444), 2022-12-02
Supplement: L__.zip [file network.pdf › network.pdf]

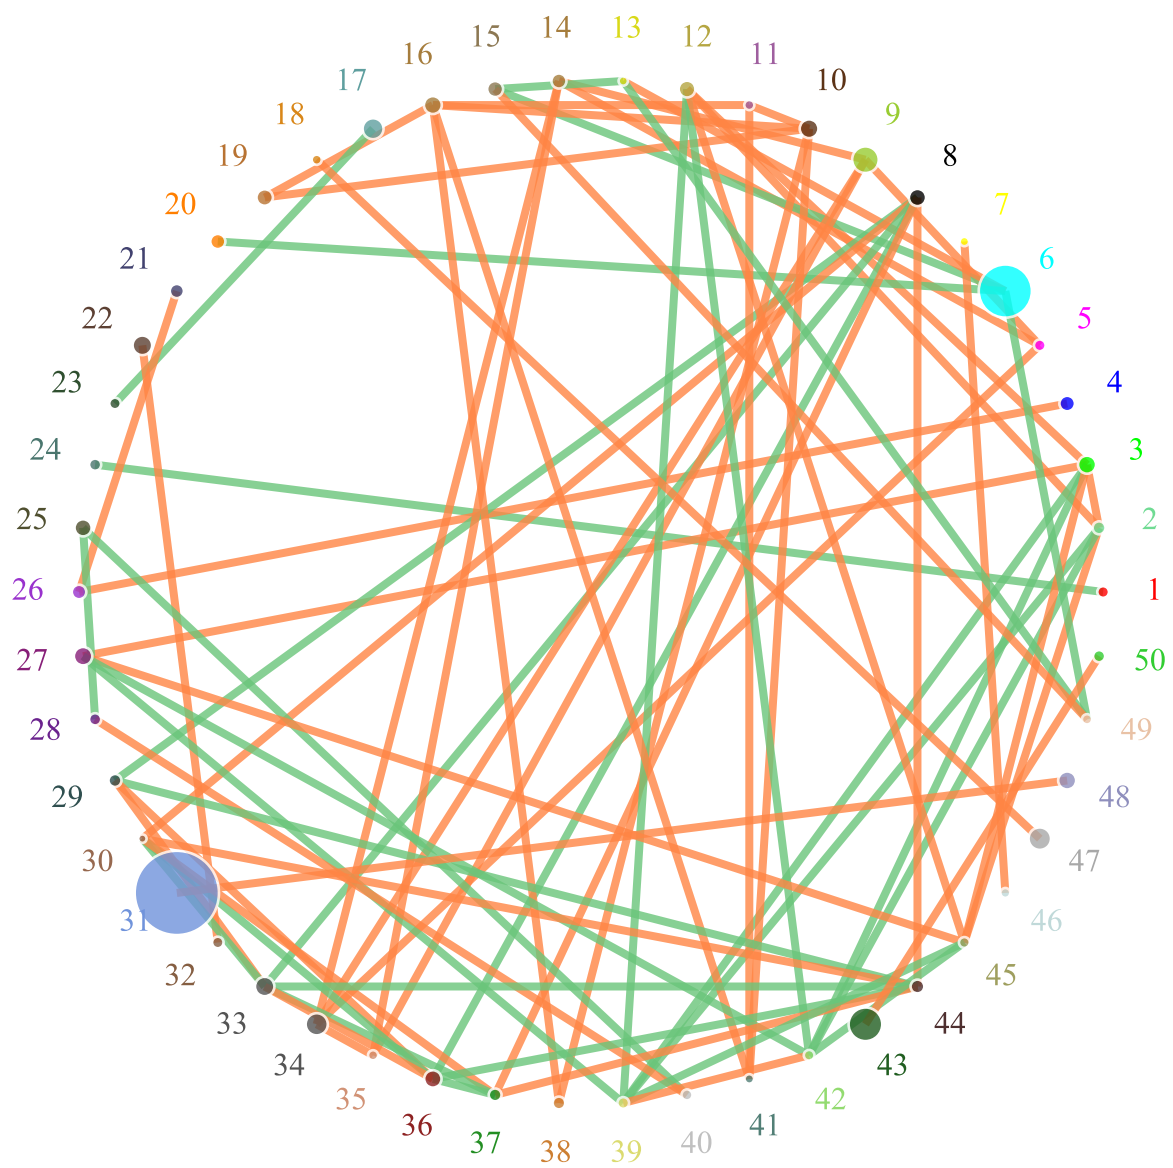

- |                                               |                                                         |
|-----------------------------------------------|---------------------------------------------------------|
| 1: <i>Phascolarctobacterium_succinatutens</i> | 26: <i>Alistipes_sp_CAG:435</i>                         |
| 2: <i>Firmicutes_bacterium_CAG:631</i>        | 27: <i>Eubacterium_sp_CAG:841</i>                       |
| 3: <i>Ruminococcus_sp_CAG:724</i>             | 28: <i>Bacteroidales_bacterium_WCE2004</i>              |
| 4: <i>Bacteroides_sp_CAG:709</i>              | 29: <i>Coprobacillus_sp_CAG:698</i>                     |
| 5: <i>Candidatus_Borkfalki_ceftriaxensis</i>  | 30: <i>Methanobrevibacter_millerae</i>                  |
| 6: <i>Ruminococcaceae_bacterium</i>           | 31: <i>Firmicutes_bacterium_CAG:110</i>                 |
| 7: <i>Alistipes_putredinis</i>                | 32: <i>Lentisphaerae_bacterium_GWF2_44_16</i>           |
| 8: <i>uncultured_Clostridium_sp</i>           | 33: <i>Staphylococcus_sp_CAG:324</i>                    |
| 9: <i>Firmicutes_bacterium</i>                | 34: <i>Firmicutes_bacterium_CAG:272</i>                 |
| 10: <i>Bacteroidales_bacterium_55_9</i>       | 35: <i>Ruminococcus_bromii</i>                          |
| 11: <i>Porphyromonadaceae_bacterium_H1</i>    | 36: <i>Firmicutes_bacterium_CAG:313</i>                 |
| 12: <i>Anaeroplasma_bactoclasticum</i>        | 37: <i>Methanobrevibacter_sp_YE315</i>                  |
| 13: <i>Prevotella_sp_tc2-28</i>               | 38: <i>Alistipes_obesi</i>                              |
| 14: <i>Acidiphilium_sp_CAG:727</i>            | 39: <i>Lentisphaerae_bacterium_RIFOXYA12_FULL_48_11</i> |
| 15: <i>Alistipes_sp_CAG:831</i>               | 40: <i>Bacteroidales_bacterium_36-12</i>                |
| 16: <i>Paludibacter_propionigenes</i>         | 41: <i>Porphyromonadaceae_bacterium_CG2_30_38_12</i>    |
| 17: <i>Victivallales_bacterium_CCUG_44730</i> | 42: <i>uncultured_bacterium</i>                         |
| 18: <i>Clostridiales_bacterium_NK3B98</i>     | 43: <i>Anaerotruncus_sp_CAG:390</i>                     |
| 19: <i>Alistipes_sp_58_9_plus</i>             | 44: <i>Methanobrevibacter_thaueri</i>                   |
| 20: <i>Akkermansia_glycaniphila</i>           | 45: <i>Prevotella_ruminicola</i>                        |
| 21: <i>Bacteroides_sp_CAG:770</i>             | 46: <i>Alistipes_sp_CHKCI003</i>                        |
| 22: <i>Victivallis_vadensis</i>               | 47: <i>Sarcina_sp_DSM_11001</i>                         |
| 23: <i>Bacteroides_sp_43_108</i>              | 48: <i>Firmicutes_bacterium_CAG:110_56_8</i>            |
| 24: <i>Faecalibacterium_prausnitzii</i>       | 49: <i>Treponema_brennaborensis</i>                     |
| 25: <i>Methanobrevibacter_olleyae</i>         | 50: <i>Ruminococcus_sp_CAG:382</i>                      |
