# Supplementary material for: Multi-omics analyses reveal that the gut microbiome and its metabolites promote milk fat synthesis in Zhongdian yak cows
Source: PeerJ journal article supplement (doi:10.7717/peerj.14444), 2022-12-02
Supplement: neg_biomarker_Web_Report.zip [file CCA_scores.xls]

Type	Label	CCA1	CCA2
gene	K00845	-0.0115397128073301	0.00450068206505263
gene	K18198	0.506954305013826	-0.0816203689840622
gene	K08714	-0.113039815402977	-0.0237970311588987
gene	K00640	-0.0065682933255612	-0.000240372767290523
gene	K07672	-0.797151170840971	-0.0138306365760393
gene	K01060	-0.0457253568496499	-0.0053563933898392
gene	K05946	-0.0318364356464316	-0.0253761045793282
gene	K11933	0.535077799999698	0.000392671601344038
gene	K07099	-0.0232614881797823	-0.0114936881222192
gene	K17329	0.834967382089298	-0.327661336431925
gene	K04075	0.00338459859509142	0.00410370993302687
gene	K03340	-0.0159422573150835	0.00337298030363877
gene	K03827	0.246467881369484	0.0745265673481967
gene	K01159	0.00198562407875435	0.0064855219228154
gene	K03470	0.0144265146949225	0.00458251653890056
gene	K07391	0.0103323743134621	0.00398691579583838
gene	K10237	0.83444764651847	-0.132314162554726
gene	K11754	0.00121829820743576	0.013198851945356
gene	K01261	-0.277780695047272	0.0572515072175662
gene	K00100	0.27153765801367	-0.0709129592159004
gene	K04061	0.205920213745424	-0.0019271072098508
gene	K03406	0.196339138243482	-0.00504620973092009
gene	K03524	0.000529751932816952	-0.00377914183163656
gene	K01714	0.00502768651788146	-0.00248494612173902
gene	K04096	-0.000874427159834885	-0.00363056371605778
gene	K02461	0.646091656060272	-0.332923766083055
gene	K04069	-0.0341659681739151	-0.00425646762247913
gene	K07126	-0.0311603031797644	0.023871131858679
gene	K09779	-0.0286602519445082	-0.0374167259876586
gene	K00817	-0.015105002364014	0.0107026396512883
gene	K02745	0.515969321025211	-0.123341135178608
gene	K07166	-0.0126737179155041	0.00454860565114066
gene	K00852	-0.0366900572764616	0.00301416411126467
gene	K19411	-0.135122720690246	-0.000610132019656586
gene	K03225	0.388798475805896	0.0310111872124735
gene	K06167	-0.0244694669434093	0.0104799320821915
gene	K02493	-0.0045483552952652	0.00667409578937699
gene	K10907	-0.00465410128576605	0.01188192893151
gene	K03412	0.227842036253416	0.00287874110006445
gene	K01729	-0.224045081106113	0.122628241670096
gene	K02784	-0.215945608178512	0.0676453102162775
gene	K03651	-0.198784933903959	0.102080811387854
gene	K00800	0.000802044395471393	-0.0097922237368904
gene	K06285	0.275892025166402	0.042124460556246
gene	K00931	0.00432151844102369	0.01143864187843
gene	K00297	-0.00378335307001547	0.0236506960026944
gene	K03769	-0.0259785878020074	0.0186002778126165
gene	K01814	-0.0192837845319609	0.035170341401093
gene	K12072	0.673657035100147	-0.448269820106253
gene	K17331	-0.902441330138944	-0.320572863371832
gene	K09815	0.0117805871793986	0.0234044948270357
gene	K02458	0.466334145186058	-0.0754351278258418
gene	K00013	-0.00585021915024131	0.0330071186820675
gene	K09761	0.000626753678541571	-0.00167047630384651
gene	K12543	0.264865743403527	-0.0380823178976529
gene	K02852	-0.142222927314072	0.032793645293601
gene	K04565	-0.0729334986122798	-0.00463012263844271
gene	K13798	0.339957249422271	0.160180440649722
gene	K19334	-0.2675713869361	-0.0253228261123458
gene	K04070	-0.0210245776995623	-0.0163300768852166
gene	K09789	-0.160787778633857	0.0343597104580854
gene	K07031	0.0882431387513801	0.0461584471965801
gene	K07121	0.279974392446804	-0.0445251037249674
gene	K02665	0.856145726679526	-0.584547553492735
gene	K07039	-0.150409039313928	-0.0118744697934855
gene	K15045	-0.167983013339809	-0.0242052479874536
gene	K00949	0.0015325694993854	-0.0142633420367302
gene	K14571	0.566163952989152	0.262502349169848
gene	K01684	-0.0290266445841645	-0.00569041918268824
gene	K05830	0.321436238535916	-0.0661827222298155
gene	K07139	0.0173714758413217	0.00800825192244875
gene	K21217	0.856343440882172	-0.575286441968235
gene	K15599	0.514774340761447	0.429154244181893
gene	K14170	-0.016954006846851	-0.0217941256642676
gene	K13665	0.318755553397023	0.0949597570102033
gene	K21029	0.0850404075579943	0.0137783703310583
gene	K05787	-0.15322806168385	0.00815669137409416
gene	K00059	0.0205053222674421	0.0107172585141454
gene	K03573	-0.485719889863766	-0.0985238989556423
gene	K07396	0.261108114123658	0.136974775611643
gene	K03607	0.808229522280027	0.163817247586491
gene	K08688	-0.535299581393582	-0.028049960746316
gene	K03643	-0.307411718865343	-0.0366370374260103
gene	K05985	-0.0313297109297171	-0.0394999480149243
gene	K12231	0.805065990938617	0.411948924303897
gene	K00765	0.0142036573375307	0.0213235603716633
gene	K06179	0.0161101244047726	0.004485543408365
gene	K00588	0.391938494473984	-0.119928226861668
gene	K02747	0.460494949822351	-0.166441120683153
gene	K02802	-0.744816447609162	-0.370251379841523
gene	K07454	-0.0415301382229571	0.0245523034004572
gene	K20452	0.487806431289093	0.0410022085358251
gene	K06926	-0.0548135252321553	0.0167842675826528
gene	K15520	-0.25481119544242	0.0203356808206643
gene	K00783	0.00521910305944273	0.00149494513410785
gene	K05989	-0.0440126660864409	-0.0366692300519853
gene	K19157	-0.0556058783449922	0.110170006141641
gene	K09777	-0.022468515459557	-0.04210576498053
gene	K15792	-0.299047282889276	-0.112387848478254
gene	K00859	-0.0153182329205649	-0.0116781252834882
gene	K16199	-0.236292138556637	-0.148652850041538
gene	K03501	0.0154999324020567	0.00999592934792107
gene	K06907	0.122339558697001	0.0337472249638054
gene	K01295	-0.067786695576713	-0.0486151190703726
gene	K08314	-0.193318811167262	-0.0762533713208504
gene	K01990	0.0120848242772712	-0.00222716801250148
gene	K06871	0.00595339591495596	0.0442627019847998
gene	K00344	-0.29203056870907	-0.0526749492357532
gene	K03101	0.0122989530603414	-0.00311425981891902
gene	K00848	-0.00108781241273855	0.00139099495582954
gene	K01483	0.278871996799227	0.145287437364615
gene	K00849	0.0150595892258523	0.0011630731621171
gene	K13014	-0.45082552210395	0.0835355722582986
gene	K02521	0.27156208550316	0.0317112097609875
gene	K00014	0.00230747075818869	0.00340978023747454
gene	K04517	-0.0158938027539522	-0.0176600250510501
gene	K04748	0.756547188441069	-0.23987306057107
gene	K18348	-0.207182907658564	-0.0179028365073091
gene	K02778	0.223446317481767	-0.0597143465708722
gene	K13611	0.786426135805832	0.413437475356889
gene	K02744	0.331481866298653	-0.0590603403077136
gene	K02501	-0.0158465709776435	0.0237805995463793
gene	K18537	0.362008732758402	0.0745335661359999
gene	K18692	0.160221024175022	-0.0510005102550081
gene	K01909	0.402230266251672	-0.247125511045271
gene	K10953	-0.672811537016053	0.140954765528154
gene	K06287	0.0133819313118405	-0.00808005980997903
gene	K11068	0.00968151260355697	-0.00018229954972266
gene	K15652	-0.195963744717103	-0.166366390779592
gene	K00969	-0.000116795945231876	-0.0018370906114234
gene	K20885	-0.139215813260486	-0.0398578885661228
gene	K00887	0.258358265518136	-0.0130431870896489
gene	K04085	0.405045513821304	0.102751032765306
gene	K01809	-0.0309017407416233	-0.0116229161643794
gene	K00945	0.0083602231019465	-0.00699921413715977
gene	K01524	-0.0238942747081424	0.0222396649300279
gene	K03218	0.0120902315907285	0.00464684553470308
gene	K03660	-0.0991063909914767	0.0251399291614047
gene	K16014	-0.51196183461812	0.449640524186465
gene	K07720	-0.0921716815179519	-0.0510335040304468
gene	K02670	0.461710180242309	0.195487062194217
gene	K10578	1.05794577443185	0.594582258374675
gene	K06145	-0.155594761895351	0.154069299372582
gene	K03407	0.212171641957483	-0.0347916796788259
gene	K03414	1.05316543663053	-0.296061562980321
gene	K05802	0.854791134396376	-0.305401783070059
gene	K17680	0.109563453534715	-0.0120994639685936
gene	K07493	0.91687547464037	0.291423508950113
gene	K07043	-0.0154336793388025	-0.00606970865242868
gene	K05970	-0.0281259389631131	-0.00810057140701625
gene	K00230	-0.150074434691887	-0.0253164296456923
gene	K05851	0.797820614735945	-0.176084977791385
gene	K04486	-0.0334331476376135	-0.0191327515721858
gene	K10942	0.978048770994614	-0.250236082021957
gene	K09512	-0.467586303124425	0.19343334092562
gene	K01736	0.00985478806569265	-0.0139136346167029
gene	K14575	-0.421012390129156	-0.0315609214894684
gene	K08169	0.21498466864008	0.0152207930028184
gene	K07053	-0.0303600493710332	-0.0248806981080968
gene	K06311	0.515458315566249	-0.0952358590212379
gene	K01299	0.128155777391406	0.0560407173972425
gene	K02445	-0.0691353025349786	-0.030061060893801
gene	K09775	-0.0403651206025671	-0.0529065897715008
gene	K15598	0.46415072206284	0.243031690613662
gene	K07341	-0.0464517311446174	-0.00834422252714415
gene	K18298	0.310336559734506	-0.213823896748304
gene	K05964	0.261459187312512	0.0343579526131123
gene	K00981	0.0123490448623357	0.000393054476921662
gene	K06139	-0.0742436302489431	0.095887649815976
gene	K03584	0.00650072238625146	0.000571371939162783
gene	K02746	0.444870756557202	-0.197649549142459
gene	K02491	0.436382382572989	0.102553643759159
gene	K07707	0.166753613530906	0.0913468368592644
gene	K14051	-0.772315593845331	0.246756506815644
gene	K02566	-0.032415923522768	-0.0153226696458576
gene	K03724	-0.0486976828801764	0.00310046419287352
gene	K05836	-0.281027939698128	0.0681844843444389
gene	K01409	0.0218867932309609	0.00948139548312007
gene	K01191	-0.0148962805085193	-0.00552382482064087
gene	K16898	0.00282825000700053	-0.00991430881053752
gene	K07574	0.00619597451995779	-0.0151730009879431
gene	K03415	0.37298653845025	-0.0687161368527516
gene	K19784	0.432140696004589	0.065225254990421
gene	K00883	-0.0815236791530025	-0.0929732084457003
gene	K08302	-0.106966887800185	0.00848905514285565
gene	K01151	0.0119460778418667	0.0142757779356466
gene	K00575	0.261870042178759	0.00523344712468377
gene	K00919	0.0175711391412793	0.0106769873267666
gene	K06305	0.148475090756382	-0.050845661456769
gene	K09951	-0.0039995039118812	0.0513069977029986
gene	K06896	-0.0840655801233789	-0.0312703628138582
gene	K00057	0.0218057982065293	0.0164457577831781
gene	K00009	-0.0374372257398729	0.0154187124623644
gene	K02919	0.114823409552106	-0.0015678803642816
gene	K01649	0.0196332027649988	0.0238581232093249
gene	K01661	0.156280876047918	0.00660805802427392
gene	K20525	-0.238022799275099	-0.0398521770904355
biplot	neg_1004	0.58775423747146	-0.562399848973394
biplot	neg_1062	0.417047342361873	-0.3843502689058
biplot	neg_1065	-0.745313595854482	0.0542276207463233
biplot	neg_1109	0.426951013863247	-0.0147874200710241
biplot	neg_1112	-0.556869341860814	0.0239425334987298
biplot	neg_1116	-0.575608969756939	0.581616851566208
biplot	neg_112	-0.483958693549463	0.307512359250036
biplot	neg_1139	0.264918900874213	0.0594510001194211
biplot	neg_1188	0.649177027335361	-0.598998204999439
