# Supplementary material for: Multi-omics analyses reveal that the gut microbiome and its metabolites promote milk fat synthesis in Zhongdian yak cows
Source: PeerJ journal article supplement (doi:10.7717/peerj.14444), 2022-12-02
Supplement: neg_biomarker_Web_Report.zip [file CCA_scores.xls]

Type	Label	CCA1	CCA2
OTU	Thermobifida	0.0914293371067526	0.217332669928994
OTU	Stappia	-0.484867187526123	-0.230680554391571
OTU	Caloramator	-0.192309128564321	-0.0016908464335864
OTU	Catenovulum	0.00649262430839207	0.0971985021697616
OTU	Erythrobacter	-0.392288658757951	-0.0327861037484173
OTU	Kriegella	-0.368690798886537	0.0464237204297658
OTU	Candidatus_Kryptonium	-0.686374588681181	0.0344304524280601
OTU	Litorimonas	-0.457877585695451	-0.13502024074221
OTU	Brevinema	-0.454584864426669	-0.151532892824052
OTU	Chloroflexus	-0.388221712494536	-0.186001879684734
OTU	Defluviimonas	0.137492104511406	0.168103590838381
OTU	Mycolicibacter	0.167790586956568	0.140264702505984
OTU	Candidatus_Tokpelaia	-0.4797609307365	-0.48208816950526
OTU	Parapedobacter	-0.253594179680196	0.0237045987843931
OTU	Candidatus_Moduliflexus	-0.267075481433542	0.0076514080717452
OTU	Pakpunavirus	-0.729782079687743	-0.367508058760925
OTU	Ottowia	0.400868669513903	0.1984349768464
OTU	Haliscomenobacter	-0.197239661350636	-0.0433528524615881
OTU	Zhihengliuella	0.0642995302174337	0.166264686077296
OTU	Propionicimonas	-0.685957125238234	0.0229803177686926
OTU	Lihuaxuella	-0.362139294109315	-0.0910002836156429
OTU	Lawsonella	-0.491352349693622	-0.413899012004957
OTU	Rodentibacter	-0.252549698393262	0.006281190313945
OTU	Candidatus_Sulfopaludibacter	-0.259331365321	-0.000141863732078741
OTU	Palleronia	0.557672353034075	0.255143883962101
OTU	Mongoliibacter	-0.314957228547301	-0.0160933806283772
OTU	Marivita	0.180117334174795	0.186474021521723
OTU	Sinirhodobacter	0.469405654660093	-0.00764124098827238
OTU	Alkalibacterium	-0.272974519720227	-0.00472144330817416
OTU	Emticicia	-0.233499980312397	-0.0343884302966959
OTU	Larkinella	-0.235163165935243	-0.0300092883012632
OTU	Suttonella	0.211876458958619	0.300482179417129
OTU	Kordiimonas	-0.268416395695913	-0.201852616903485
OTU	Pararhodospirillum	-0.543474444390153	-0.416965920901238
OTU	Microscilla	-0.49180462036317	0.0450828973436326
OTU	Limnobacter	-0.759066448600411	-0.0600494136428675
OTU	Melghirimyces	-0.364997334315003	0.0191125550135541
OTU	Marmoricola	0.408566036656042	0.0048126101573142
OTU	Halothiobacillus	0.0134007844843145	0.31305197784655
OTU	Novimethylophilus	-0.626970333971539	-0.0378518841925201
OTU	Gottschalkia	-0.199226166991927	0.050401088869448
OTU	Thermoanaerobacter	-0.208238152665979	0.0262364886695284
OTU	Jiangella	-0.291842546921522	0.0609735477181181
OTU	Lmd1virus	0.388888437894045	0.458992957544574
OTU	Melissococcus	0.087433024234401	-0.00246155302687038
OTU	Acidaminobacter	-0.242525302636513	0.0607651687278926
OTU	Turicibacter	-0.172863080629601	0.029242190196022
OTU	Thermosyntropha	-0.209646229274691	-0.0394743081958927
OTU	Harryflintia	-0.285177859483429	-0.0407888413342789
OTU	Anaerobacterium	-0.194170807371368	-0.0142203632755548
OTU	Trichormus	0.0473820350064117	0.150103861596387
OTU	Dolosicoccus	0.090550962982972	0.114222595317996
OTU	Sideroxydans	0.260488322947988	0.0225710023776908
OTU	Mailhella	0.128684538479265	-0.0169134792190195
OTU	Fimbriimonas	-0.380949466672643	0.0471526418297908
OTU	Ornithobacterium	-0.230285324573841	-0.0291411224092074
OTU	Izhakiella	-0.851295750525603	-0.0430660665569276
OTU	Comamonas	0.0526530113161537	0.165796705050347
OTU	Candidatus_Electrothrix	-0.249888471158269	-0.0783008605158326
OTU	Anoxybacillus	-0.236504068930437	0.0319975724190157
OTU	Thermopetrobacter	-0.390111180204833	-0.226636552606361
OTU	Variovorax	-0.203126850902514	0.0187146244929639
OTU	Natribacillus	-0.240140664388396	-0.0134110970925758
OTU	Lacinutrix	-0.291315973822429	-0.0166601850931638
OTU	Candidatus_Sulfotelmatomonas	-0.314840830702555	0.0418049813474871
OTU	Methanosalsum	0.217022250217333	0.0787449943050472
OTU	Thiodictyon	0.228919248736505	0.0670283179639064
OTU	Candidatus_Symbiobacter	-0.433726843890621	-0.108325450420524
OTU	Caldicellulosiruptor	-0.187834863827131	0.0259615873672685
OTU	Cvm10virus	-0.749634085105727	-0.264518173304761
OTU	Promicromonospora	-0.357591616854502	-0.0072857918008676
OTU	Mudcatvirus	-0.501542393006864	0.128815624972419
OTU	Porticoccus	-0.428296633746896	-0.154733443167813
OTU	Parafilimonas	0.109856947594564	0.432043466401659
OTU	Natronolimnobius	-0.486357151649076	-0.0404882776679964
OTU	Beggiatoa	-0.161398854658017	-0.0467857722257519
OTU	Sulfobacillus	-0.325621855148625	-0.0240348334931885
OTU	Limestonevirus	-0.530320443951915	-0.143936291762434
OTU	Leminorella	0.0787490566069229	0.0340407787942832
OTU	Succinimonas	0.124930515621156	0.322984916541173
OTU	Amantichitinum	-0.410738987365829	-0.102476735868299
OTU	Pacificibacter	-0.434398600860346	-0.184265404998878
OTU	Eah2virus	-0.695769898609804	-0.266810548050396
OTU	Candidatus_Arcanobacter	-0.582126119353525	-0.0381215397703307
OTU	Candidatus_Halobonum	-0.614752459201751	-0.185854252061193
OTU	Ktedonobacter	-0.250652997964467	-0.0897470010811247
OTU	Metaprevotella	-0.900608877697848	0.0130492525653231
biplot	neg_1004	0.402643378880031	0.716444085663548
biplot	neg_1062	0.405503361089323	0.597575734586145
biplot	neg_1065	-0.607588666083307	-0.314537297956936
biplot	neg_1109	0.611280788360646	0.283141343517463
biplot	neg_1112	-0.273029418883475	-0.389559237780485
biplot	neg_1116	-0.325089842953463	-0.825709353593465
biplot	neg_112	-0.442024495988425	-0.485406076380894
biplot	neg_1139	0.733487819600546	-0.178680602132751
biplot	neg_1188	0.462534606079364	0.62638394502934
