# Supplementary material for: Multi-omics analyses reveal that the gut microbiome and its metabolites promote milk fat synthesis in Zhongdian yak cows
Source: PeerJ journal article supplement (doi:10.7717/peerj.14444), 2022-12-02
Supplement: neg_biomarker_Web_Report.zip [file treat1_H_L.vs.H_L_coinertia_analysis.xls]

ID	SV1	SV2	shapetype	colortype
neg_1004	2.12876856331749	-0.375594773636185	metabolite	metabolite
neg_1062	0.642469539043303	-0.14308703292763	metabolite	metabolite
neg_1065	-0.0428877253089777	-0.550542578282507	metabolite	metabolite
neg_1109	0.964896190256195	-0.336031119039735	metabolite	metabolite
neg_1112	-0.747592805122356	0.964574380646978	metabolite	metabolite
neg_1116	0.129797060647966	-0.0247806245992155	metabolite	metabolite
neg_112	-1.20838564112484	1.17634629204578	metabolite	metabolite
neg_1139	0.669759146099631	-0.0253862362829276	metabolite	metabolite
neg_1188	0.69584338322953	-0.127802197459435	metabolite	metabolite
neg_1307	-0.907019285590288	0.529324072375712	metabolite	metabolite
neg_1330	-0.746114131542398	0.384641101667394	metabolite	metabolite
neg_1354	1.01193903804035	-0.166560309916209	metabolite	metabolite
neg_136	1.66561621096891	-0.319582544690042	metabolite	metabolite
neg_1361	-0.0396417740967132	0.351303950723833	metabolite	metabolite
neg_1363	0.227141069592605	-0.34977357278533	metabolite	metabolite
neg_1382	-0.709052687190919	0.757737023974439	metabolite	metabolite
neg_1401	1.68559396749011	-0.0743653379110591	metabolite	metabolite
neg_1413	0.845116451675381	-0.301418988640303	metabolite	metabolite
neg_1432	1.23512479734052	-0.462327604662264	metabolite	metabolite
neg_1438	0.269207344987372	-0.16237902780804	metabolite	metabolite
neg_1450	-1.30763674485723	0.968145449360788	metabolite	metabolite
neg_1496	-0.823236372480959	-0.0361368952318117	metabolite	metabolite
neg_1532	1.53613459251711	-0.222936006870707	metabolite	metabolite
neg_1554	-0.0185165862066	-0.525660514730951	metabolite	metabolite
neg_1563	0.780143798342556	-0.036024960081429	metabolite	metabolite
neg_162	-0.187711754884721	-0.285303784108876	metabolite	metabolite
neg_1649	-0.956373490333334	0.388102393819093	metabolite	metabolite
neg_1717	0.764883873758835	-0.0476006913553665	metabolite	metabolite
neg_1718	1.37382998673874	0.281075228780898	metabolite	metabolite
neg_1727	0.621288467566449	-0.012811432607874	metabolite	metabolite
neg_1737	0.859551382656495	-0.200643993680866	metabolite	metabolite
neg_176	0.820228772902865	-0.294710523327472	metabolite	metabolite
neg_1781	-0.0285507562488792	0.161998635835763	metabolite	metabolite
neg_1791	-0.0706099430184328	0.375022388755685	metabolite	metabolite
neg_1796	0.210079053362199	-0.201344606926266	metabolite	metabolite
neg_1798	-0.711865342161806	0.857908815892919	metabolite	metabolite
neg_1804	-0.949591062550694	0.820743352985436	metabolite	metabolite
neg_1852	-0.671007944713551	0.645941735841919	metabolite	metabolite
neg_1863	-0.115783651417957	0.352460114249206	metabolite	metabolite
neg_1874	0.943040791264675	0.00872079803239076	metabolite	metabolite
neg_1884	0.583097546918412	-0.00176763179022015	metabolite	metabolite
neg_1886	-0.379314342053363	-0.00631733352425141	metabolite	metabolite
neg_1901	-0.0577319011398325	0.29830121829967	metabolite	metabolite
neg_193	-0.0599227417096291	0.12365116537257	metabolite	metabolite
neg_1993	-0.31436959141181	0.454653545945168	metabolite	metabolite
neg_1996	-0.370342306411095	0.400043083973573	metabolite	metabolite
neg_1998	0.981484532894922	-0.168594831657593	metabolite	metabolite
neg_2032	0.869859177526935	0.131057889205965	metabolite	metabolite
neg_2038	1.25033643110387	-0.0340319223005093	metabolite	metabolite
neg_2056	-1.23349096186486	0.38656721708805	metabolite	metabolite
neg_2068	-0.161053468617267	0.101273388621753	metabolite	metabolite
neg_207	-0.57394412949384	0.692196968705339	metabolite	metabolite
neg_2109	-0.56283058717563	-0.966071873620055	metabolite	metabolite
neg_2116	-0.239472582459315	0.0438380568042835	metabolite	metabolite
neg_2134	-0.458395432472047	0.165153714587881	metabolite	metabolite
neg_2135	0.0356535000269093	-0.744479858327376	metabolite	metabolite
neg_2157	-0.822857000814107	0.875931907676215	metabolite	metabolite
neg_2164	-0.338911725770296	0.539773170065179	metabolite	metabolite
neg_2197	-0.837835453088926	0.460449689373169	metabolite	metabolite
neg_2251	0.251152388691678	-0.195401021791172	metabolite	metabolite
neg_2257	-1.08692362993266	0.490306067808317	metabolite	metabolite
neg_2264	1.12258344298498	-0.619610396311887	metabolite	metabolite
neg_2267	0.253688069795801	-0.139437414605633	metabolite	metabolite
neg_2280	-0.960256960466886	0.484311538972043	metabolite	metabolite
neg_2282	-0.601904399492985	0.644365518779561	metabolite	metabolite
neg_2298	0.163254508184827	0.0883858282208903	metabolite	metabolite
neg_2310	0.723486359555803	-0.0643159622784246	metabolite	metabolite
neg_2373	-0.632034597590223	0.618364159918327	metabolite	metabolite
neg_2383	1.01604767074072	-0.239658574776832	metabolite	metabolite
neg_2400	-0.457729936736926	0.21077864005687	metabolite	metabolite
neg_2415	-0.954917875233142	0.645044278434891	metabolite	metabolite
neg_2446	-0.848183991153773	0.703143606973821	metabolite	metabolite
neg_2456	-1.36919094115668	1.17779353312699	metabolite	metabolite
neg_2461	-0.648516018632165	0.459673353096649	metabolite	metabolite
neg_2462	-0.728167242231652	0.231639038988444	metabolite	metabolite
neg_2485	-0.172284222870178	0.0559249660338632	metabolite	metabolite
neg_2505	-0.353951636911539	0.378147614996634	metabolite	metabolite
neg_2564	-0.192392166674998	0.0160493851935523	metabolite	metabolite
neg_2570	-0.61774347002645	0.278583339806523	metabolite	metabolite
neg_26	0.617266066527689	-0.130265501623648	metabolite	metabolite
neg_2627	1.09941884870568	0.144965196604647	metabolite	metabolite
neg_2643	-1.02046920464058	-0.224734728345709	metabolite	metabolite
neg_2684	-0.321468188243287	0.161742921733299	metabolite	metabolite
neg_2705	0.0227920712541688	-0.758596596164515	metabolite	metabolite
neg_2738	1.26101944366154	-0.474573022155337	metabolite	metabolite
neg_2754	0.304016222413724	0.00881020102140077	metabolite	metabolite
neg_2788	0.688789383487181	0.134996237278351	metabolite	metabolite
neg_2801	1.01119366156347	-0.485888903116084	metabolite	metabolite
neg_2803	-0.499389248969821	0.327866477011669	metabolite	metabolite
neg_2833	-0.493774415117831	0.446313507711606	metabolite	metabolite
neg_2842	-0.338264765264054	0.0303300160733864	metabolite	metabolite
neg_2851	0.917299704531439	-0.103064444469356	metabolite	metabolite
neg_286	-1.12433403738367	0.46255342905865	metabolite	metabolite
neg_2886	-0.704580694753717	0.331993926134043	metabolite	metabolite
neg_2892	0.90591675110433	-0.3628125651607	metabolite	metabolite
neg_2932	-0.686488424952446	0.59528094421804	metabolite	metabolite
neg_2965	-0.743981030454143	0.520924248437458	metabolite	metabolite
neg_2972	-1.17484862406741	-0.580529926376878	metabolite	metabolite
neg_2973	1.21218710754161	-0.165185816206075	metabolite	metabolite
neg_302	0.599096223140502	-0.0900799320742597	metabolite	metabolite
neg_3064	-0.960376685600534	0.358916706662491	metabolite	metabolite
neg_3088	-1.06599773087409	0.803865895605466	metabolite	metabolite
neg_3092	0.198922372598259	-0.0454811503734843	metabolite	metabolite
neg_3101	1.81334059177253	-0.154462702790907	metabolite	metabolite
neg_3158	-0.302626922624168	0.111918337555465	metabolite	metabolite
neg_3198	-0.472677752818593	0.228810789024371	metabolite	metabolite
neg_3252	0.88509310391013	-0.114031779906748	metabolite	metabolite
neg_3294	0.901579686218692	-0.220915435216631	metabolite	metabolite
neg_3351	-0.515484787628095	0.096541583598291	metabolite	metabolite
neg_3355	-0.00760119067991693	0.123701236165834	metabolite	metabolite
neg_3360	-1.5394150765986	0.312615803304248	metabolite	metabolite
neg_3362	1.50450926437633	0.434884059129772	metabolite	metabolite
neg_3377	-0.663032396303874	1.30029935194601	metabolite	metabolite
neg_3414	1.56036451127873	-0.0577134984846678	metabolite	metabolite
neg_3422	1.09677482613063	-0.207738632676418	metabolite	metabolite
neg_344	-0.195392641959371	-0.192122073432967	metabolite	metabolite
neg_3440	-0.326695198179357	0.318111357240087	metabolite	metabolite
neg_3458	-0.738914383051726	-0.198631085016186	metabolite	metabolite
neg_3487	0.834486215551059	-0.277105533351926	metabolite	metabolite
neg_3496	-0.591849669236256	0.33046375196042	metabolite	metabolite
neg_3498	0.775036110367064	-0.131997180403267	metabolite	metabolite
neg_3504	-0.963405358642061	0.502022509640211	metabolite	metabolite
neg_3529	0.921825551252214	-0.0529510953907433	metabolite	metabolite
neg_3564	1.10021872016979	0.323324966591343	metabolite	metabolite
neg_3566	1.0894300150916	-0.613691279755941	metabolite	metabolite
neg_3586	-0.0474187385995827	-0.102873607132483	metabolite	metabolite
neg_3587	1.02275668368778	0.024861985290378	metabolite	metabolite
neg_3592	-0.784799585107948	0.104960500905827	metabolite	metabolite
neg_3608	-0.908870663986017	0.423093257092071	metabolite	metabolite
neg_3609	-0.911242782577437	0.912904823758227	metabolite	metabolite
neg_3623	0.785702025307971	-0.290731328181753	metabolite	metabolite
neg_3637	-0.774323991742337	0.847696969705289	metabolite	metabolite
neg_3653	-1.00784169766284	0.727821073223501	metabolite	metabolite
neg_3656	0.966689407971041	-0.0113938714534072	metabolite	metabolite
neg_3666	-0.490647584536757	-0.441456430848119	metabolite	metabolite
neg_3689	-0.633260437507348	0.662196319594929	metabolite	metabolite
neg_3705	1.2996185066566	-0.41009002260428	metabolite	metabolite
neg_3723	1.70966846585558	-0.247064446888921	metabolite	metabolite
neg_3739	-0.686803503375655	-0.634935084935404	metabolite	metabolite
neg_3759	-0.558718838641045	-1.2071679479196	metabolite	metabolite
neg_3762	-0.0544267030055399	0.211849950693072	metabolite	metabolite
neg_3785	-0.445195383236215	0.609554976245908	metabolite	metabolite
neg_3807	-0.849166355942304	0.751723369697367	metabolite	metabolite
neg_3820	-0.224997496045199	0.118319434227695	metabolite	metabolite
neg_3852	-0.206880878037955	-0.062429074919518	metabolite	metabolite
neg_3889	1.15103806471101	-0.364052882845343	metabolite	metabolite
neg_392	-0.763649548230489	0.742568286651049	metabolite	metabolite
neg_3940	-0.762218125919245	0.793238823998417	metabolite	metabolite
neg_396	0.0649100746297861	-0.729061187066335	metabolite	metabolite
neg_410	0.159542150182111	0.0822167929077019	metabolite	metabolite
neg_412	-0.21186193107898	0.233212312221311	metabolite	metabolite
neg_416	0.297851890772407	0.0193718815456126	metabolite	metabolite
neg_420	-0.701438029087803	0.491581326268956	metabolite	metabolite
neg_430	-0.839374007621425	0.970951018109728	metabolite	metabolite
neg_483	0.126336558540439	-0.59544076507031	metabolite	metabolite
neg_497	1.59614580186727	-0.376413800604861	metabolite	metabolite
neg_552	-1.25775530479668	0.110110079830414	metabolite	metabolite
neg_560	1.12554190697707	0.0273542372298079	metabolite	metabolite
neg_580	0.890502408398776	0.126353885881026	metabolite	metabolite
neg_59	1.44367217668957	-0.262009595852893	metabolite	metabolite
neg_637	1.12730997768365	-0.220081393078977	metabolite	metabolite
neg_64	-0.44564390672411	-0.284277353928005	metabolite	metabolite
neg_675	0.911411932280506	-0.327768277474122	metabolite	metabolite
neg_677	0.254853128452971	-0.123537057182165	metabolite	metabolite
neg_681	0.657495653908999	-0.318469241451097	metabolite	metabolite
neg_685	-0.419662061688232	0.190219715902798	metabolite	metabolite
neg_708	0.649047311598716	-0.0632949774195104	metabolite	metabolite
neg_71	-0.325640138597163	0.00158747599311335	metabolite	metabolite
neg_726	-0.814924339675614	0.515455821105882	metabolite	metabolite
neg_727	-1.12479742388445	0.846043312373704	metabolite	metabolite
neg_757	-0.771357215365843	0.502085488431498	metabolite	metabolite
neg_758	-0.348916240818562	-0.276327032638752	metabolite	metabolite
neg_763	0.765332508484258	-0.140531113346138	metabolite	metabolite
neg_769	0.916179098822435	0.00498686675882068	metabolite	metabolite
neg_771	1.01108279503805	0.150817663970801	metabolite	metabolite
neg_781	1.71323362979264	-0.403788797967513	metabolite	metabolite
neg_783	1.40521082476929	0.050302367695197	metabolite	metabolite
neg_794	-1.127711078135	0.87878191630709	metabolite	metabolite
neg_826	-0.150842389193968	-0.604040960300209	metabolite	metabolite
neg_84	0.865913304280158	-0.332843099351948	metabolite	metabolite
neg_842	0.317507758747908	-0.0925612087749701	metabolite	metabolite
neg_846	2.13613763582332	-0.245295364605595	metabolite	metabolite
neg_861	-0.315429399198133	0.0649199917557014	metabolite	metabolite
neg_911	-0.772922695111617	0.0367367270776143	metabolite	metabolite
neg_919	-0.61322333307992	-0.451924176481533	metabolite	metabolite
neg_94	1.65270393754477	-0.325313650380429	metabolite	metabolite
neg_985	-0.164089050439007	0.0497712652420577	metabolite	metabolite
neg_994	0.166185650560878	-0.223580678731904	metabolite	metabolite
Thermobifida	0.944413352286925	-0.593419948408172	OTU	OTU
Stappia	-3.01638286830051	0.222041606810606	OTU	OTU
Caloramator	-0.999205847305336	-0.282609316601662	OTU	OTU
Catenovulum	0.234710434837296	-0.276156350621578	OTU	OTU
Anaerotignum	0.247333636984286	-0.293768228661292	OTU	OTU
Erythrobacter	-2.11543588064441	-0.571092289110981	OTU	OTU
Kriegella	-1.80668163412992	-0.843124141804857	OTU	OTU
Candidatus_Kryptonium	-3.60349411536164	-0.749663061950329	OTU	OTU
Litorimonas	-2.92719614580652	-0.0503166626424561	OTU	OTU
Brevinema	-2.87780960168634	-0.0448030030527325	OTU	OTU
Chloroflexus	-2.35365612435237	-0.426673270926016	OTU	OTU
Defluviimonas	0.973174094024604	0.0535182199824701	OTU	OTU
Mycolicibacter	1.03265383132255	0.192463096257513	OTU	OTU
Candidatus_Tokpelaia	-3.27274526316052	0.304516934773425	OTU	OTU
Parapedobacter	-1.19576575783473	-0.623515416577544	OTU	OTU
Candidatus_Moduliflexus	-1.37555969231592	-0.509200140733441	OTU	OTU
Pakpunavirus	-3.87914048666755	-1.39347868920764	OTU	OTU
Ottowia	2.49492780178995	0.103269784060774	OTU	OTU
Haliscomenobacter	-1.05077544248624	-0.280989166162085	OTU	OTU
Zhihengliuella	0.759903222773468	-0.51291914718451	OTU	OTU
Propionicimonas	-3.27421714279716	-1.82750797159021	OTU	OTU
Lihuaxuella	-1.91212667466956	-0.518044451772095	OTU	OTU
Lawsonella	-3.73646200749684	1.96690377293427	OTU	OTU
Rodentibacter	-1.31416962527231	-0.409594670670342	OTU	OTU
Candidatus_Sulfopaludibacter	-1.3242728308606	-0.506317704088152	OTU	OTU
Palleronia	3.36489751433227	0.52120630267691	OTU	OTU
Mongoliibacter	-1.6714077580726	-0.416007711531965	OTU	OTU
Marivita	1.61427745050593	-0.750525820137919	OTU	OTU
Sinirhodobacter	2.47457606564296	0.941935782619165	OTU	OTU
Alkalibacterium	-1.3972097973232	-0.441578289113464	OTU	OTU
Emticicia	-1.17300358207591	-0.44635920070327	OTU	OTU
Larkinella	-1.26777602228046	-0.269078805998591	OTU	OTU
Suttonella	1.4762845264398	-0.0790907448016643	OTU	OTU
Kordiimonas	-1.83773313551998	0.122002450678239	OTU	OTU
Dethiosulfovibrio	0.250089456993407	-0.465998760360511	OTU	OTU
Pararhodospirillum	-3.20641608548749	-0.617938178356349	OTU	OTU
Acetivibrio	-0.0954743917527782	-0.371821066445287	OTU	OTU
Microscilla	-2.2898308115315	-1.51386866045764	OTU	OTU
Limnobacter	-4.34004190459716	-0.671875413191975	OTU	OTU
Melghirimyces	-1.78921171091186	-0.680320063681873	OTU	OTU
Marmoricola	1.94944246628977	1.08183899889964	OTU	OTU
Halothiobacillus	0.564001881714019	-0.847687835611919	OTU	OTU
Novimethylophilus	-2.90236910189368	-1.95337704076907	OTU	OTU
Gottschalkia	-0.933439206984532	-0.471253551200782	OTU	OTU
Thermoanaerobacter	-1.06886082809762	-0.352643764148656	OTU	OTU
Jiangella	-1.32995406314633	-0.702377486216176	OTU	OTU
Lmd1virus	3.50151922404128	-0.82264148201308	OTU	OTU
Melissococcus	0.421277028971802	0.263624839961249	OTU	OTU
Negativicoccus	0.140292004330384	0.173106598897594	OTU	OTU
Acidaminobacter	-1.10244834444581	-0.602464211720154	OTU	OTU
Turicibacter	-0.9021582932855	-0.201754799243614	OTU	OTU
Thermosyntropha	-1.1261729638742	-0.227357050660268	OTU	OTU
Harryflintia	-1.62226150593093	-0.0338386975149371	OTU	OTU
Anaerobacterium	-1.02272710252275	-0.297137506724405	OTU	OTU
Trichormus	0.630534155143803	-0.612543101035269	OTU	OTU
Dolosicoccus	0.749738946925289	-0.0537321181737358	OTU	OTU
Sideroxydans	1.36997507185065	0.355792339029864	OTU	OTU
Methanosphaerula	1.39245360983909	-0.430992270227181	OTU	OTU
Mailhella	0.545979890322863	0.453488070667305	OTU	OTU
Synergistes	-0.0198320152199139	-0.0466162334940303	OTU	OTU
Fimbriimonas	-1.88173147391827	-0.722908574340076	OTU	OTU
Ornithobacterium	-1.1097041686044	-0.532126134969686	OTU	OTU
Izhakiella	-4.57217368445461	-1.04261077470946	OTU	OTU
Comamonas	0.637102964095666	-0.25155422921372	OTU	OTU
Candidatus_Electrothrix	-1.47760470345005	-0.15844996543186	OTU	OTU
Anoxybacillus	-1.15759806395367	-0.493239531814765	OTU	OTU
Thermopetrobacter	-2.30600964508483	-0.447458800026028	OTU	OTU
Variovorax	-1.07108488894128	-0.15598826292823	OTU	OTU
Rubrivivax	0.0862110482464963	0.0969166580855904	OTU	OTU
Flexilinea	0.125491846271167	0.127675902094676	OTU	OTU
Natribacillus	-1.33609175132776	-0.340985387007396	OTU	OTU
Lacinutrix	-1.35521867958785	-0.879189206650465	OTU	OTU
Candidatus_Sulfotelmatomonas	-1.72456253035556	-0.128245455372211	OTU	OTU
Methanosalsum	1.30765123116967	0.23778509812811	OTU	OTU
Thiodictyon	1.45197846313233	0.227202888780987	OTU	OTU
Candidatus_Symbiobacter	-2.55738340799538	-0.130121842166921	OTU	OTU
Caldicellulosiruptor	-0.896263218888972	-0.387307983707185	OTU	OTU
Desulfocucumis	0.30850961093139	-0.278743982376596	OTU	OTU
Dactylococcopsis	1.1521667351271	-0.51847793415885	OTU	OTU
Cvm10virus	-4.00156446142705	-1.70297761291848	OTU	OTU
Promicromonospora	-2.07530629278296	0.120840908848964	OTU	OTU
Mudcatvirus	-2.64082260222007	-0.695011221615343	OTU	OTU
Porticoccus	-2.67550242612529	-0.207306349215206	OTU	OTU
Parafilimonas	1.19799793620414	-0.399114096417775	OTU	OTU
Natronolimnobius	-2.27162666015608	-1.48261945174868	OTU	OTU
Beggiatoa	-0.956680385601889	-0.0306394827996808	OTU	OTU
Sulfobacillus	-1.97700235246443	0.133540811026545	OTU	OTU
Limestonevirus	-3.33694771603814	0.151037823286544	OTU	OTU
Leminorella	0.658027363667729	-0.304819662707012	OTU	OTU
Candidatus_Kryptobacter	0.506481450069073	0.0124480857818029	OTU	OTU
Succinimonas	1.1241260867225	-0.470936209044226	OTU	OTU
Amantichitinum	-2.40360356272855	0.415952950299116	OTU	OTU
Pacificibacter	-2.60969098890672	0.0209747777727836	OTU	OTU
Eah2virus	-5.47344280960742	2.3765537534906	OTU	OTU
Candidatus_Arcanobacter	-2.83057877135482	-1.30953665131416	OTU	OTU
Altibacter	-2.44527235728287	0.883893046567493	OTU	OTU
Candidatus_Halobonum	-3.62580267617727	-0.876830371557409	OTU	OTU
Ktedonobacter	-1.37061912980465	-0.27552914646253	OTU	OTU
Metaprevotella	-4.25918723344406	-2.31873292972899	OTU	OTU
