# Supplementary material for: Multi-omics analyses reveal that the gut microbiome and its metabolites promote milk fat synthesis in Zhongdian yak cows
Source: PeerJ journal article supplement (doi:10.7717/peerj.14444), 2022-12-02
Supplement: neg_biomarker_Web_Report.zip [file treat1_H_L.vs.H_L_coinertia_analysis.xls]

ID	SV1	SV2	shapetype	colortype
neg_1004	2.37442384154673	0.791809298247756	metabolite	metabolite
neg_1062	0.665851401966683	0.0537595518719499	metabolite	metabolite
neg_1065	-0.0379044747691067	-0.686130229619626	metabolite	metabolite
neg_1109	0.930448297396512	-0.268576715191944	metabolite	metabolite
neg_1112	-1.06164010112121	0.40224821012399	metabolite	metabolite
neg_1116	0.079784016956246	-0.115660811599611	metabolite	metabolite
neg_112	-1.28330340083538	0.978902561879728	metabolite	metabolite
neg_1139	0.613823637765676	0.00513373531030608	metabolite	metabolite
neg_1188	0.745382734914477	0.0827844714326166	metabolite	metabolite
neg_1307	-0.962840115192693	0.370524029591622	metabolite	metabolite
neg_1330	-0.770506925301723	0.175492199451524	metabolite	metabolite
neg_1354	1.05945533466408	0.0527769032521612	metabolite	metabolite
neg_136	1.69249984013061	-0.0207444878966444	metabolite	metabolite
neg_1361	-0.104960808700553	0.324347387123867	metabolite	metabolite
neg_1363	0.280246569062733	-0.259326654947103	metabolite	metabolite
neg_1382	-0.851279678179103	0.529496064390613	metabolite	metabolite
neg_1401	1.67763597437273	0.368622730302769	metabolite	metabolite
neg_1413	0.853897754574821	-0.0467745978264944	metabolite	metabolite
neg_1432	1.32244114305572	-0.0984262903953071	metabolite	metabolite
neg_1438	0.304598165605676	-0.0811079656384175	metabolite	metabolite
neg_1450	-1.28470705028058	0.899355542783907	metabolite	metabolite
neg_1496	-0.756639707015052	-0.069835956001067	metabolite	metabolite
neg_1532	1.77243816691074	0.620641094715106	metabolite	metabolite
neg_1554	-0.0152572519371711	-0.740758911716608	metabolite	metabolite
neg_1563	0.850116627441297	0.30274278737436	metabolite	metabolite
neg_162	-0.0883044768399452	-0.248343592522107	metabolite	metabolite
neg_1649	-1.02073409239351	0.103990306952417	metabolite	metabolite
neg_1717	0.76415283296678	0.0901138708705719	metabolite	metabolite
neg_1718	1.26518763794294	0.728943283573524	metabolite	metabolite
neg_1727	0.627862740063475	0.11622365299087	metabolite	metabolite
neg_1737	0.864420746967284	-0.00468936019672726	metabolite	metabolite
neg_176	0.871151810118645	-0.204113318802989	metabolite	metabolite
neg_1781	-0.0293947940098464	0.123049589769752	metabolite	metabolite
neg_1791	-0.141669282841751	0.116330055123669	metabolite	metabolite
neg_1796	0.246730208077319	-0.101610123871766	metabolite	metabolite
neg_1798	-0.877193445614771	0.510373980645527	metabolite	metabolite
neg_1804	-1.1109410951213	0.636462195516872	metabolite	metabolite
neg_1852	-0.81055692430802	0.140105413855605	metabolite	metabolite
neg_1863	-0.1384528281251	0.269478259223379	metabolite	metabolite
neg_1874	0.943721950208062	0.381566118924867	metabolite	metabolite
neg_1884	0.614337197512193	0.13012284339484	metabolite	metabolite
neg_1886	-0.43633031977664	0.0357523995084302	metabolite	metabolite
neg_1901	-0.30002670100658	-0.0624578245662194	metabolite	metabolite
neg_193	0.00724763557457232	0.296284288834568	metabolite	metabolite
neg_1993	-0.499987765490528	0.227603781319159	metabolite	metabolite
neg_1996	-0.427925398851913	0.319884921315148	metabolite	metabolite
neg_1998	1.15510283142241	0.36768537160694	metabolite	metabolite
neg_2032	0.771962808637183	0.0768349699562923	metabolite	metabolite
neg_2038	1.37503486118325	0.381258901930811	metabolite	metabolite
neg_2056	-1.16251038827546	0.444594722940824	metabolite	metabolite
neg_2068	-0.254069024575891	-0.124343436333427	metabolite	metabolite
neg_207	-0.800840782186692	0.360936127331917	metabolite	metabolite
neg_2109	-0.252621837758122	-0.672905461993551	metabolite	metabolite
neg_2116	-0.323333128994916	-0.0335158030228524	metabolite	metabolite
neg_2134	-0.462991886823644	0.136592689724995	metabolite	metabolite
neg_2135	0.0980215053134524	-0.86632554864419	metabolite	metabolite
neg_2157	-0.976111015879519	0.634883394235567	metabolite	metabolite
neg_2164	-0.476787462657241	0.436307531393993	metabolite	metabolite
neg_2197	-0.932851931678198	0.203456059633079	metabolite	metabolite
neg_2251	0.199013308854763	-0.354934388610202	metabolite	metabolite
neg_2257	-1.01462307989872	0.454854444041822	metabolite	metabolite
neg_2264	1.21447495759055	-0.317549014158254	metabolite	metabolite
neg_2267	0.252590130093906	-0.0742981201211174	metabolite	metabolite
neg_2280	-0.967665666950064	0.462953563456747	metabolite	metabolite
neg_2282	-0.7212303785713	0.463827217460493	metabolite	metabolite
neg_2298	0.0474920760362077	-0.0736268298677306	metabolite	metabolite
neg_2310	0.787922172887613	0.265049593535646	metabolite	metabolite
neg_2373	-0.69336225592918	0.406656263161862	metabolite	metabolite
neg_2383	1.00496554481077	-0.111865438716411	metabolite	metabolite
neg_2400	-0.556828678657588	-0.090924728572435	metabolite	metabolite
neg_2415	-1.00502324115274	0.496482629037138	metabolite	metabolite
neg_2446	-0.928178268888178	0.518464397459393	metabolite	metabolite
neg_2456	-1.37274603834217	1.02923077323351	metabolite	metabolite
neg_2461	-0.67388011161773	0.296039759812853	metabolite	metabolite
neg_2462	-0.683486671271388	0.323115944356852	metabolite	metabolite
neg_2485	-0.236447762315779	0.0684847952203974	metabolite	metabolite
neg_2505	-0.534514792389989	0.041709536782403	metabolite	metabolite
neg_2564	-0.208748150735121	0.0860826347270729	metabolite	metabolite
neg_2570	-0.680841475017768	0.140443430729174	metabolite	metabolite
neg_26	0.716209476683219	0.244317258361934	metabolite	metabolite
neg_2627	1.05864259135022	0.243648586462863	metabolite	metabolite
neg_2643	-0.864014940184214	-0.138969224964048	metabolite	metabolite
neg_2684	-0.429266620006697	0.0789658625243544	metabolite	metabolite
neg_2705	0.0911770917064506	-0.876910034830862	metabolite	metabolite
neg_2738	1.37362482367092	-0.122420790067473	metabolite	metabolite
neg_2754	0.300837473584509	0.0483709773653839	metabolite	metabolite
neg_2788	0.660800139937164	0.349146421819808	metabolite	metabolite
neg_2801	1.03074307616459	-0.394986352477495	metabolite	metabolite
neg_2803	-0.616350762770874	0.033254541345128	metabolite	metabolite
neg_2833	-0.514532555254885	0.29420617269996	metabolite	metabolite
neg_2842	-0.327078457047779	-0.0567112702791224	metabolite	metabolite
neg_2851	0.959958182266502	0.139867570058275	metabolite	metabolite
neg_286	-1.08915111067839	0.479271184388099	metabolite	metabolite
neg_2886	-0.719894212756664	0.195812842136318	metabolite	metabolite
neg_2892	0.903209122591727	-0.16055610631328	metabolite	metabolite
neg_2932	-0.772373599459903	0.442195827335825	metabolite	metabolite
neg_2965	-0.882870973154553	0.138131915585144	metabolite	metabolite
neg_2972	-1.05793290956148	-0.632172436518634	metabolite	metabolite
neg_2973	1.20639153719041	0.176793641084228	metabolite	metabolite
neg_302	0.64765253536508	0.0624247583686201	metabolite	metabolite
neg_3064	-0.923889125712118	0.267533844579276	metabolite	metabolite
neg_3088	-1.15942501387727	0.732279342532737	metabolite	metabolite
neg_3092	0.180692292730431	-0.114383188159009	metabolite	metabolite
neg_3101	1.89574807669311	0.642840540129436	metabolite	metabolite
neg_3158	-0.345062321312017	-0.0789349862439156	metabolite	metabolite
neg_3198	-0.546390818040499	-0.0968925355059312	metabolite	metabolite
neg_3252	0.97207161080839	0.267435393689584	metabolite	metabolite
neg_3294	0.883333624989687	-0.11286745504106	metabolite	metabolite
neg_3351	-0.479551816271707	0.208324268075615	metabolite	metabolite
neg_3355	0.0175924939083476	0.22666307067308	metabolite	metabolite
neg_3360	-1.37646426368722	0.502603696566799	metabolite	metabolite
neg_3362	1.28304352482851	0.352138495579257	metabolite	metabolite
neg_3377	-0.944646848202482	0.953433228565608	metabolite	metabolite
neg_3414	1.46090251302023	0.00750705603737961	metabolite	metabolite
neg_3422	1.11388520569934	0.015343576765836	metabolite	metabolite
neg_344	-0.0516468713897372	-0.0738120524535243	metabolite	metabolite
neg_3440	-0.450771751519642	0.0639866422403955	metabolite	metabolite
neg_3458	-0.688209019576886	-0.284484600429438	metabolite	metabolite
neg_3487	0.847798742570734	-0.0452866496123914	metabolite	metabolite
neg_3496	-0.632531844541061	0.203944622563323	metabolite	metabolite
neg_3498	0.821657734708332	0.122763153454862	metabolite	metabolite
neg_3504	-1.0092497548285	0.337190112028557	metabolite	metabolite
neg_3529	0.886701544084002	0.128885879123133	metabolite	metabolite
neg_3564	0.984339223673375	0.570253102967131	metabolite	metabolite
neg_3566	1.30135999916333	-0.244669888666036	metabolite	metabolite
neg_3586	-0.0121758191963415	-0.0717197835753198	metabolite	metabolite
neg_3587	0.990411804318243	0.187241826488691	metabolite	metabolite
neg_3592	-0.643736895068978	0.263822803285677	metabolite	metabolite
neg_3608	-0.954974789889096	0.261179429602499	metabolite	metabolite
neg_3609	-1.02781166145114	0.664732012117481	metabolite	metabolite
neg_3623	0.811967676641672	-0.0710644000395312	metabolite	metabolite
neg_3637	-0.901109895396197	0.58919357760977	metabolite	metabolite
neg_3653	-1.06640387153192	0.590542159183867	metabolite	metabolite
neg_3656	0.872531546601981	-0.0272962246212716	metabolite	metabolite
neg_3666	-0.753355839376665	-1.07877659240781	metabolite	metabolite
neg_3689	-0.71183485751238	0.482593908234225	metabolite	metabolite
neg_3705	1.39158657065384	-0.0399708405529048	metabolite	metabolite
neg_3723	1.83339575647609	0.610381665885327	metabolite	metabolite
neg_3739	-0.460762572682157	-0.355094116310695	metabolite	metabolite
neg_3759	-0.436659852847938	-1.47582707102875	metabolite	metabolite
neg_3762	-0.120785722565639	0.0895921892907148	metabolite	metabolite
neg_3785	-0.47124418631593	0.54697079255143	metabolite	metabolite
neg_3807	-0.847377161102439	0.766236855297433	metabolite	metabolite
neg_3820	-0.205005120296893	0.167917248245494	metabolite	metabolite
neg_3852	-0.179575534329854	-0.20181617025084	metabolite	metabolite
neg_3889	1.33038940405258	0.384403828443793	metabolite	metabolite
neg_392	-0.90981394286595	0.588037340234771	metabolite	metabolite
neg_3940	-0.910564364927541	0.656043505208186	metabolite	metabolite
neg_396	0.134396408747293	-0.836551177780061	metabolite	metabolite
neg_410	0.107171055101611	0.0381887211192329	metabolite	metabolite
neg_412	-0.22236425438471	0.19103250436695	metabolite	metabolite
neg_416	0.279303300532306	0.0247947695218208	metabolite	metabolite
neg_420	-0.789704755434836	0.253804846678057	metabolite	metabolite
neg_430	-1.01536785158462	0.663753371357836	metabolite	metabolite
neg_483	0.205596786285484	-0.638518485325845	metabolite	metabolite
neg_497	1.50695803425115	-0.387478864206588	metabolite	metabolite
neg_552	-1.09308716283308	0.254013061211548	metabolite	metabolite
neg_560	1.2113414614705	0.570281614532597	metabolite	metabolite
neg_580	0.854868634863409	0.366898975026061	metabolite	metabolite
neg_59	1.46232564038535	-0.0435667988382674	metabolite	metabolite
neg_637	1.06182981094115	-0.0323529435970876	metabolite	metabolite
neg_64	-0.36563544920124	-0.182252779767021	metabolite	metabolite
neg_675	0.940463049181294	-0.246181983685024	metabolite	metabolite
neg_677	0.281355069835885	-0.036939249157205	metabolite	metabolite
neg_681	0.733444873614084	-0.0701930716977329	metabolite	metabolite
neg_685	-0.501805696840083	-0.131121090838269	metabolite	metabolite
neg_708	0.666965708781422	0.0750100920170532	metabolite	metabolite
neg_71	-0.261262708448307	0.04144381506724	metabolite	metabolite
neg_726	-0.877444552574405	0.348899116047009	metabolite	metabolite
neg_727	-1.21681829292104	0.60401760813417	metabolite	metabolite
neg_757	-0.832010185425627	0.345014045352835	metabolite	metabolite
neg_758	-0.294776218591063	-0.189133379034921	metabolite	metabolite
neg_763	0.816582740226077	0.173148638854669	metabolite	metabolite
neg_769	0.90145832368749	0.117569565787098	metabolite	metabolite
neg_771	0.881393195095611	0.305470177531659	metabolite	metabolite
neg_781	1.7413226405626	-0.0993149468555194	metabolite	metabolite
neg_783	1.51874996964614	0.82165999167325	metabolite	metabolite
neg_794	-1.15678054631946	0.825259725180411	metabolite	metabolite
neg_826	0.0123482324268716	-0.56331818754164	metabolite	metabolite
neg_84	0.890688978735577	-0.193697568449067	metabolite	metabolite
neg_842	0.312922375653526	-0.0786990506832119	metabolite	metabolite
neg_846	2.2366537841426	0.459662502268473	metabolite	metabolite
neg_861	-0.293402408395854	0.113646560220024	metabolite	metabolite
neg_911	-0.631444506703386	0.0975825197649057	metabolite	metabolite
neg_919	-0.40197838556795	-0.120020057724838	metabolite	metabolite
neg_94	1.6587825096164	-0.0677818561131006	metabolite	metabolite
neg_985	-0.212774686516603	-0.0636219713616875	metabolite	metabolite
neg_994	0.206530195887009	-0.228949198079288	metabolite	metabolite
K00845	-0.227015248873158	0.101922780543948	gene	gene
K18198	8.01675069708671	2.26807911188004	gene	gene
K08714	-1.98350047137738	0.103574346242539	gene	gene
K00640	-0.154160199832576	0.219730598172474	gene	gene
K07672	-10.705630005139	-5.1724164805609	gene	gene
K01060	-0.631307772125518	0.0842126492235947	gene	gene
K05946	-0.429677915014215	-0.0990564977619337	gene	gene
K11933	9.66002313337162	-1.99137155886495	gene	gene
K07099	-0.282977231530469	-0.0576527384210139	gene	gene
K17329	14.6998855775873	3.36442432073343	gene	gene
K04075	-0.00365257633217884	0.102528564782619	gene	gene
K03340	-0.181707583458178	-0.197654504651549	gene	gene
K03827	3.43259333763708	0.688450535974145	gene	gene
K01159	-0.0565326361591362	-0.018166374130696	gene	gene
K03470	0.145675397597581	0.129369379145094	gene	gene
K07391	0.0610170902903684	0.219983344094398	gene	gene
K10237	14.2487756659177	2.76499876202701	gene	gene
K11754	0.00449867375805805	-0.064631074974813	gene	gene
K01261	-3.94524818589097	-2.70301661119315	gene	gene
K00100	4.50078678670463	1.70168944797408	gene	gene
K04061	3.07839043975343	1.22523378349865	gene	gene
K03406	2.68314320099676	0.687590197312936	gene	gene
K03524	-0.0724688639152183	0.182627517200841	gene	gene
K01714	0.0686915264095322	0.14832971836482	gene	gene
K04096	-0.0904227744764883	0.113651184241092	gene	gene
K02461	12.8564231040424	0.510628230396068	gene	gene
K04069	-0.386564144241387	-0.0600578007685629	gene	gene
K07126	-0.58796598912196	-0.15027225451697	gene	gene
K09779	-0.377175356813034	0.0242010598854911	gene	gene
K00817	-0.242486725952454	0.246680368946502	gene	gene
K02745	7.17482323831893	1.22789748735265	gene	gene
K07166	-0.160002628661706	0.00879607149492485	gene	gene
K00852	-0.415588640907926	0.0111076913306643	gene	gene
K19411	-1.65497860511187	-1.25791046075872	gene	gene
K03225	5.54962503889437	2.55042440106237	gene	gene
K06167	-0.333343109493872	-0.284101117743152	gene	gene
K02493	-0.0742444709291057	-0.202570857090584	gene	gene
K10907	-0.0435858760942449	0.0936765315599459	gene	gene
K03412	3.0905151340954	0.955698475339362	gene	gene
K01729	-3.93795825838872	-0.105254685561007	gene	gene
K02784	-2.97350076274741	-3.54921787014845	gene	gene
K03651	-3.2190294722614	-1.00878344178346	gene	gene
K00800	0.059518624084573	0.00681234212034486	gene	gene
K06285	4.51452676792684	1.44866301358784	gene	gene
K00931	0.0571982547637364	-0.0198161853001087	gene	gene
K00297	-0.0874512443100283	-0.0461565545491407	gene	gene
K03769	-0.392243106170377	-0.427077942421573	gene	gene
K01814	-0.326084528256847	0.209234367692777	gene	gene
K12072	12.3625222322509	3.0666388148842	gene	gene
K17331	-11.6885785679702	-11.1973897978179	gene	gene
K09815	0.0100090258547537	0.149007562172491	gene	gene
K02458	9.66756439123975	-2.86254967092714	gene	gene
K00013	-0.142284246744476	0.166590743210251	gene	gene
K09761	-0.0390153559021439	-0.229462331406551	gene	gene
K12543	4.96362327241213	1.23078418103827	gene	gene
K02852	-2.04570609840255	-1.54124001523132	gene	gene
K04565	-1.45021166848386	0.0682730303267662	gene	gene
K13798	3.97947448321294	2.6463871684271	gene	gene
K19334	-3.24716353660057	-3.03502450233432	gene	gene
K04070	-0.197093482286319	-0.114410657428261	gene	gene
K09789	-3.5538171741267	-0.277421894742222	gene	gene
K07031	1.57270833351707	0.0210467000716651	gene	gene
K07121	4.12318757726778	2.14329248972397	gene	gene
K02665	15.7069928200572	3.74394437089197	gene	gene
K07039	-2.16601637904342	-0.812291594839171	gene	gene
K15045	-2.19763403688337	-0.848057385335589	gene	gene
K00949	0.0530898008332325	0.0490515980821172	gene	gene
K14571	9.31486202571153	-0.364818449223407	gene	gene
K01684	-0.311004223189038	-0.368253136934383	gene	gene
K05830	5.02597439184106	2.33079417916753	gene	gene
K07139	0.108073706498928	0.33467580077796	gene	gene
K21217	15.6745283036449	3.92673473214476	gene	gene
K15599	6.48129996667429	4.34343981828246	gene	gene
K14170	-0.162959961145961	-0.220441293184371	gene	gene
K13665	4.56326358881074	3.52955563939866	gene	gene
K21029	1.32517697250208	-0.107908478440019	gene	gene
K05787	-3.26839363232765	0.262292949290778	gene	gene
K00059	0.194138926276231	0.126369611987611	gene	gene
K03573	-5.56838988560888	-5.75987439222929	gene	gene
K07396	3.60423245416696	1.11632204881025	gene	gene
K03607	13.38756460412	0.749009985194081	gene	gene
K08688	-8.95417161746082	1.06716772575659	gene	gene
K03643	-4.88597872282368	-2.4604025189136	gene	gene
K05985	-0.252110503199679	-0.273598940829835	gene	gene
K12231	12.5670680201548	0.298774998894895	gene	gene
K00765	0.109844991354654	0.248045097369486	gene	gene
K06179	0.165422130308809	0.118161140500093	gene	gene
K00588	8.61075330855412	-1.2541311840249	gene	gene
K02747	6.1518761909885	2.3738480416275	gene	gene
K02802	-11.0846693956175	-8.02928584435992	gene	gene
K07454	-0.677409431640233	-0.0176279628069962	gene	gene
K20452	8.34693635190422	0.699190635229328	gene	gene
K06926	-1.02065518080915	-0.122282366851622	gene	gene
K15520	-3.24880310699565	-2.29476410609779	gene	gene
K00783	0.0245575776664327	0.0380180884090136	gene	gene
K05989	-0.377457222849417	-0.396464304962589	gene	gene
K19157	-1.52532883398088	0.3840188403216	gene	gene
K09777	-0.201525382655832	-0.145752685967938	gene	gene
K15792	-3.13524496106652	-3.21056030681316	gene	gene
K00859	-0.181428337525762	-0.170212517318787	gene	gene
K16199	-2.5472817378983	-1.68948062440843	gene	gene
K03501	0.155367670033489	0.0376322012576025	gene	gene
K06907	2.011559798813	0.694940727359007	gene	gene
K01295	-0.725216476951598	-0.475317769487157	gene	gene
K08314	-1.9695509693867	-1.83959549367568	gene	gene
K01990	0.158979300570934	-0.0314501237083711	gene	gene
K06871	-0.0660427086782693	0.174536715225318	gene	gene
K00344	-3.77000300840691	-2.71987559762027	gene	gene
K03101	0.0976901088904011	0.0253217325753636	gene	gene
K00848	0.064677289139849	-0.132893453486374	gene	gene
K01483	4.52897199310737	-1.36627922153846	gene	gene
K00849	0.170433541968257	0.112386582498772	gene	gene
K13014	-6.18522526356025	-4.29105265153801	gene	gene
K02521	4.52976178989433	-1.54629620526997	gene	gene
K00014	-0.0626729099007702	0.436589456927233	gene	gene
K04517	-0.150055009476999	-0.143295747298445	gene	gene
K04748	11.4392069483879	3.08324042308669	gene	gene
K18348	-2.23667395837323	-0.942448494230608	gene	gene
K02778	2.98747707184885	1.91616343750095	gene	gene
K13611	10.6559334305054	0.217551654038951	gene	gene
K02744	4.22626554588556	2.32718895371648	gene	gene
K02501	-0.206081766440994	0.175955113661136	gene	gene
K18537	6.62832851001055	-3.13561298150645	gene	gene
K18692	2.55003896582886	-0.392120598959811	gene	gene
K01909	6.34340659783226	1.50932982764	gene	gene
K10953	-9.89822515174897	-0.762257301960864	gene	gene
K06287	0.180083950831272	-0.0210969354490667	gene	gene
K11068	-0.0874575767883455	0.100290019816018	gene	gene
K15652	-2.18737262297118	-1.33589196041837	gene	gene
K00969	0.0684097047339668	-0.182704642319522	gene	gene
K20885	-1.86273388302136	-1.43052831223926	gene	gene
K00887	4.01015219014673	-0.956905815648575	gene	gene
K04085	5.5704105213659	1.49549397183509	gene	gene
K01809	-0.26009706261774	-0.648004340564618	gene	gene
K00945	0.123447209955843	-0.0768771887788482	gene	gene
K01524	-0.43952523240391	0.402905978149309	gene	gene
K03218	0.186077893078171	-0.0818512663747977	gene	gene
K03660	-1.14690560646816	-0.60016344751249	gene	gene
K16014	-9.49397197044352	-1.08627314066473	gene	gene
K07720	-0.982717613298594	-0.146508305263603	gene	gene
K02670	6.9949933900354	0.928924993113631	gene	gene
K10578	14.1949984178768	-0.114225933490965	gene	gene
K06145	-2.66973002512203	-1.22554250879421	gene	gene
K03407	2.68726757879775	0.971367145680481	gene	gene
K03414	16.8271184087714	1.70127409621163	gene	gene
K05802	14.7570424023533	-1.56224430448151	gene	gene
K17680	1.55884760035027	0.826157360127382	gene	gene
K07493	12.1225430194082	1.02224148967245	gene	gene
K07043	-0.189045874174081	-0.113382991258069	gene	gene
K05970	-0.298952459826808	-0.774258265802458	gene	gene
K00230	-1.51780690020455	-1.73728613549101	gene	gene
K05851	13.5890031875522	1.30541679173026	gene	gene
K04486	-0.295494134048007	-0.0446482122392561	gene	gene
K10942	16.1746873830015	0.887560048997741	gene	gene
K09512	-11.7536597453636	6.72949047773825	gene	gene
K01736	0.171681735883133	0.045469035226575	gene	gene
K14575	-7.104372770762	-2.63200518395521	gene	gene
K08169	2.68952738058325	1.59650754336779	gene	gene
K07053	-0.240981267281815	-0.449188463208338	gene	gene
K06311	9.09120085747704	-0.81316067287691	gene	gene
K01299	1.53431061454566	0.975287449729682	gene	gene
K02445	-0.607108348724483	-0.994338117890968	gene	gene
K09775	-0.595820862700177	0.0930182263047046	gene	gene
K15598	6.38090361407489	1.59341029323505	gene	gene
K07341	-0.477501764356094	-0.289261705225834	gene	gene
K18298	6.84067106772061	-0.501615730417989	gene	gene
K05964	3.33032849323831	2.93064347410317	gene	gene
K00981	0.0948562366961535	-0.0224638123109488	gene	gene
K06139	-3.02142618893974	1.83646055876192	gene	gene
K03584	0.0451090304731546	-0.103813914076098	gene	gene
K02746	6.1585405000038	1.54549584151771	gene	gene
K02491	8.11763737021868	-2.45769286287532	gene	gene
K07707	3.05348416439886	-0.539679400069247	gene	gene
K14051	-15.5905070143132	7.55949518576599	gene	gene
K02566	-0.278949831438744	-0.516297691868013	gene	gene
K03724	-0.720024695042478	0.550897993890196	gene	gene
K05836	-3.58058631992017	-3.075599699032	gene	gene
K01409	0.268158667198565	0.018206345167103	gene	gene
K01191	-0.0933639455442195	-0.209245964352853	gene	gene
K16898	0.049539833478824	0.178939403394408	gene	gene
K07574	0.0870914241685803	0.162187365827209	gene	gene
K03415	5.06405643864695	0.888828506939099	gene	gene
K19784	6.59915540967519	-1.24224574743685	gene	gene
K00883	-0.839618808037743	-0.468744154065082	gene	gene
K08302	-1.2998372773807	-0.504826063653567	gene	gene
K01151	0.165282149416927	0.0247325176615416	gene	gene
K00575	3.5245954283478	0.554072340589607	gene	gene
K00919	0.183598167430295	0.0151849265841436	gene	gene
K06305	2.38591653020899	-0.109672864760225	gene	gene
K09951	-0.396692499852015	0.15907021808524	gene	gene
K06896	-1.39301508683725	0.790395011841627	gene	gene
K00057	0.190087780300203	0.254409366756202	gene	gene
K00009	-0.406299936453251	-0.426227983510951	gene	gene
K02919	1.98075115279653	-0.38088245683518	gene	gene
K01649	0.173352648208642	0.393287769895696	gene	gene
K01661	1.94817719853222	0.622840829129503	gene	gene
K20525	-3.41885546040073	-2.86833317684223	gene	gene
