# Supplementary material for: Multi-omics analyses reveal that the gut microbiome and its metabolites promote milk fat synthesis in Zhongdian yak cows
Source: PeerJ journal article supplement (doi:10.7717/peerj.14444), 2022-12-02
Supplement: neg_biomarker_Web_Report.zip [file treat1_H_L.vs.H_L_feature_importance_kfold_summary.xls]

	0	1	2	3	mean	std
K10953	0.008264462809917356	0.009297520661157025	0.009249743062692703	0.007261410788381744	0.008518284330537206	0.0009637422893949327
K09815	0.008264462809917356	0.009297520661157025	0.007194244604316547	0.008298755186721993	0.008263745815528231	0.0008590206521363796
K01736	0.008264462809917356	0.008264462809917356	0.007194244604316547	0.006224066390041494	0.007486809153548189	0.00098142816357665
K03340	0.009297520661157025	0.007231404958677686	0.007194244604316547	0.006224066390041494	0.007486809153548189	0.0012940918010713347
neg_1781	0.007231404958677686	0.007231404958677686	0.006166495375128468	0.006224066390041494	0.006713342920631334	0.0005986680526908657
K04748	0.008264462809917356	0.006198347107438017	0.0051387461459403904	0.006224066390041494	0.006456405613334314	0.0013071435786062048
neg_1401	0.006198347107438017	0.007231404958677686	0.006166495375128468	0.006224066390041494	0.006455078457821416	0.0005180864127659092
neg_3609	0.005165289256198347	0.007231404958677686	0.007194244604316547	0.006224066390041494	0.006453751302308519	0.0009774056037579978
neg_344	0.004132231404958678	0.005165289256198347	0.008221993833504625	0.007261410788381744	0.006195231320760849	0.0018762777201323255
K02745	0.006198347107438017	0.008264462809917356	0.006166495375128468	0.004149377593360997	0.0061946707214612096	0.0016800863703239019
neg_994	0.007231404958677686	0.005165289256198347	0.0051387461459403904	0.006224066390041494	0.005939876687714479	0.0009984329214043262
K04486	0.006198347107438017	0.006198347107438017	0.0051387461459403904	0.006224066390041494	0.005939876687714479	0.0005342246242970853
K06896	0.007231404958677686	0.006198347107438017	0.0051387461459403904	0.0051867219917012455	0.0059388050509393345	0.0009906058382016857
neg_136	0.006198347107438017	0.005165289256198347	0.006166495375128468	0.006224066390041494	0.005938549532201581	0.0005160443837377282
neg_162	0.006198347107438017	0.006198347107438017	0.006166495375128468	0.0051867219917012455	0.005937477895426436	0.0005007291099115317
K01661	0.006198347107438017	0.006198347107438017	0.006166495375128468	0.0051867219917012455	0.005937477895426436	0.0005007291099115317
K00014	0.006198347107438017	0.005165289256198347	0.0051387461459403904	0.006224066390041494	0.005681612224904563	0.0006117092031907543
K04069	0.006198347107438017	0.006198347107438017	0.0051387461459403904	0.0051867219917012455	0.005680540588129418	0.0005982321752859788
K11754	0.005165289256198347	0.005165289256198347	0.006166495375128468	0.006224066390041494	0.0056802850693916645	0.0005951302270107615
K07043	0.004132231404958678	0.005165289256198347	0.0041109969167523125	0.008298755186721993	0.0054268181911578325	0.0019768459781084585
neg_919	0.006198347107438017	0.005165289256198347	0.0041109969167523125	0.006224066390041494	0.005424674917607543	0.0010050914045984212
neg_1998	0.0030991735537190084	0.006198347107438017	0.0051387461459403904	0.007261410788381744	0.00542441939886979	0.0017759390859543355
K04096	0.006198347107438017	0.006198347107438017	0.0041109969167523125	0.0051867219917012455	0.005423603280832398	0.0009965781798887319
neg_3414	0.006198347107438017	0.005165289256198347	0.0051387461459403904	0.0051867219917012455	0.0054222761253195	0.000517752649843036
K04517	0.005165289256198347	0.005165289256198347	0.006166495375128468	0.0051867219917012455	0.005420948969806601	0.0004971336165409434
K03724	0.007231404958677686	0.0030991735537190084	0.006166495375128468	0.0051867219917012455	0.005420948969806601	0.0017587015750403874
neg_758	0.005165289256198347	0.005165289256198347	0.006166495375128468	0.0051867219917012455	0.005420948969806601	0.0004971336165409434
K03406	0.004132231404958678	0.007231404958677686	0.006166495375128468	0.004149377593360997	0.005419877333031457	0.001539618184686207
neg_286	0.004132231404958678	0.008264462809917356	0.006166495375128468	0.003112033195020747	0.005418805696256312	0.0022827817127287374
neg_3785	0.006198347107438017	0.005165289256198347	0.0010277492291880781	0.008298755186721993	0.005172535194886609	0.0030553147531453334
neg_2564	0.005165289256198347	0.005165289256198347	0.0051387461459403904	0.0051867219917012455	0.005164011662509583	1.9641536521438104e-05
neg_1496	0.005165289256198347	0.006198347107438017	0.0051387461459403904	0.004149377593360997	0.005162940025734438	0.0008366535507333066
neg_2267	0.005165289256198347	0.006198347107438017	0.0051387461459403904	0.004149377593360997	0.005162940025734438	0.0008366535507333066
neg_727	0.004132231404958678	0.005165289256198347	0.006166495375128468	0.0051867219917012455	0.005162684506996685	0.0008306733092033558
neg_3092	0.005165289256198347	0.005165289256198347	0.007194244604316547	0.003112033195020747	0.005159214077933497	0.0016665705931899195
neg_2886	0.002066115702479339	0.006198347107438017	0.008221993833504625	0.004149377593360997	0.0051589585591957435	0.0026487383354341348
K02784	0.006198347107438017	0.004132231404958678	0.0041109969167523125	0.0051867219917012455	0.004907074355212563	0.0009966124299875692
neg_3653	0.004132231404958678	0.006198347107438017	0.0051387461459403904	0.004149377593360997	0.00490467556292452	0.0009824323730618248
K03827	0.007231404958677686	0.005165289256198347	0.0051387461459403904	0.0020746887966804984	0.0049025322893742306	0.002124867442033923
K14575	0.004132231404958678	0.004132231404958678	0.0020554984583761563	0.008298755186721993	0.004654679113753876	0.0026192195861693356
neg_2032	0.004132231404958678	0.005165289256198347	0.003083247687564234	0.006224066390041494	0.004651208684690688	0.0013498147157629777
neg_2643	0.005165289256198347	0.005165289256198347	0.003083247687564234	0.0051867219917012455	0.004650137047915543	0.0010446417671267248
K21029	0.006198347107438017	0.004132231404958678	0.003083247687564234	0.0051867219917012455	0.004650137047915543	0.0013426648021618282
neg_3498	0.004132231404958678	0.004132231404958678	0.0041109969167523125	0.006224066390041494	0.00464988152917779	0.0010495043121857674
K19411	0.004132231404958678	0.005165289256198347	0.0041109969167523125	0.0051867219917012455	0.004648809892402645	0.0006088777902191328
neg_84	0.005165289256198347	0.005165289256198347	0.0041109969167523125	0.004149377593360997	0.0046477382556275	0.0005978217936631861
K06871	0.005165289256198347	0.0030991735537190084	0.0051387461459403904	0.0051867219917012455	0.0046474827368897485	0.0010323926302738134
neg_3587	0.0030991735537190084	0.0030991735537190084	0.006166495375128468	0.006224066390041494	0.004647227218151995	0.0017876929082606859
K00057	0.004132231404958678	0.005165289256198347	0.0051387461459403904	0.004149377593360997	0.004646411100114604	0.0005839667239251377
neg_2257	0.0030991735537190084	0.006198347107438017	0.006166495375128468	0.003112033195020747	0.00464401230782656	0.0017764569736575919
K00969	0.005165289256198347	0.004132231404958678	0.0020554984583761563	0.006224066390041494	0.004394271377393668	0.0017777459578195032
K04075	0.005165289256198347	0.0030991735537190084	0.0041109969167523125	0.0051867219917012455	0.004390545429592729	0.0009966466789093906
K09777	0.007231404958677686	0.006198347107438017	0.0020554984583761563	0.0020746887966804984	0.004389984830293089	0.0027174905590340763
neg_677	0.004132231404958678	0.005165289256198347	0.0041109969167523125	0.004149377593360997	0.004389473792817584	0.0005174484949662881
K01060	0.005165289256198347	0.004132231404958678	0.0041109969167523125	0.004149377593360997	0.004389473792817584	0.0005174484949662881
K00588	0.0030991735537190084	0.007231404958677686	0.0041109969167523125	0.003112033195020747	0.004388402156042438	0.001953701334756322
neg_3504	0.0030991735537190084	0.006198347107438017	0.0051387461459403904	0.003112033195020747	0.004387075000529541	0.0015416590520820651
K19784	0.004132231404958678	0.005165289256198347	0.0051387461459403904	0.003112033195020747	0.004387075000529541	0.0009766104311286772
neg_2264	0.002066115702479339	0.004132231404958678	0.007194244604316547	0.004149377593360997	0.004385492326278891	0.0021125410089730314
K04061	0.0030991735537190084	0.0030991735537190084	0.0041109969167523125	0.006224066390041494	0.004133352603557955	0.001473164001729663
K05985	0.005165289256198347	0.005165289256198347	0.003083247687564234	0.003112033195020747	0.004131464848745419	0.0011938154414176086
K10578	0.004132231404958678	0.004132231404958678	0.0041109969167523125	0.004149377593360997	0.0041312093300076656	1.5713229217150543e-05
neg_1361	0.005165289256198347	0.0030991735537190084	0.0041109969167523125	0.004149377593360997	0.0041312093300076656	0.0008436345505673924
K13611	0.004132231404958678	0.004132231404958678	0.0041109969167523125	0.004149377593360997	0.0041312093300076656	1.5713229217150543e-05
neg_2415	0.0030991735537190084	0.0030991735537190084	0.0051387461459403904	0.0051867219917012455	0.004130953811269914	0.0011915582011768568
K05851	0.0030991735537190084	0.0030991735537190084	0.0051387461459403904	0.0051867219917012455	0.004130953811269914	0.0011915582011768568
K18537	0.004132231404958678	0.005165289256198347	0.0041109969167523125	0.003112033195020747	0.004130137693232521	0.0008383408774762007
neg_2383	0.005165289256198347	0.002066115702479339	0.0051387461459403904	0.004149377593360997	0.004129882174494769	0.0014548065690547704
neg_1363	0.0030991735537190084	0.0030991735537190084	0.003083247687564234	0.006224066390041494	0.003876415296260936	0.0015651187352523686
neg_3351	0.0030991735537190084	0.004132231404958678	0.003083247687564234	0.0051867219917012455	0.0038753436594857913	0.0010025900634188605
neg_3355	0.0010330578512396695	0.004132231404958678	0.0041109969167523125	0.006224066390041494	0.0038750881407480383	0.002138271154543744
neg_1532	0.004132231404958678	0.004132231404958678	0.003083247687564234	0.004149377593360997	0.0038742720227106465	0.0005274114963910218
K07396	0.004132231404958678	0.004132231404958678	0.003083247687564234	0.004149377593360997	0.0038742720227106465	0.0005274114963910218
K09779	0.004132231404958678	0.004132231404958678	0.003083247687564234	0.004149377593360997	0.0038742720227106465	0.0005274114963910218
neg_911	0.004132231404958678	0.004132231404958678	0.003083247687564234	0.004149377593360997	0.0038742720227106465	0.0005274114963910218
K07039	0.006198347107438017	0.0030991735537190084	0.003083247687564234	0.003112033195020747	0.0038732003859355017	0.0015501425280377821
K00013	0.004132231404958678	0.005165289256198347	0.003083247687564234	0.003112033195020747	0.0038732003859355017	0.0009899480585132412
K00845	0.0030991735537190084	0.004132231404958678	0.0041109969167523125	0.004149377593360997	0.0038729448671977486	0.0005160863573143027
K01814	0.004132231404958678	0.0030991735537190084	0.0041109969167523125	0.004149377593360997	0.0038729448671977486	0.0005160863573143027
neg_2400	0.0030991735537190084	0.002066115702479339	0.0051387461459403904	0.0051867219917012455	0.003872689348459996	0.0015482911682470585
neg_3064	0.002066115702479339	0.006198347107438017	0.0041109969167523125	0.003112033195020747	0.0038718732304226034	0.001761417797014884
K00765	0.004132231404958678	0.004132231404958678	0.0041109969167523125	0.003112033195020747	0.0038718732304226034	0.000506658917109238
K01483	0.002066115702479339	0.005165289256198347	0.0010277492291880781	0.006224066390041494	0.0036208051444768146	0.0024700471334835935
neg_410	0.004132231404958678	0.0030991735537190084	0.003083247687564234	0.004149377593360997	0.003616007559900729	0.0006060586116643794
K10237	0.004132231404958678	0.0030991735537190084	0.003083247687564234	0.004149377593360997	0.003616007559900729	0.0006060586116643794
K13798	0.004132231404958678	0.0030991735537190084	0.003083247687564234	0.004149377593360997	0.003616007559900729	0.0006060586116643794
neg_2505	0.005165289256198347	0.005165289256198347	0.0020554984583761563	0.0020746887966804984	0.003615191441863337	0.001789915926383771
K00800	0.004132231404958678	0.004132231404958678	0.003083247687564234	0.003112033195020747	0.0036149359231255843	0.0005974369603619265
neg_3739	0.005165289256198347	0.0030991735537190084	0.003083247687564234	0.003112033195020747	0.0036149359231255843	0.0010336359470070268
K02491	0.0030991735537190084	0.0030991735537190084	0.0041109969167523125	0.004149377593360997	0.0036146804043878313	0.0005954622267657351
neg_1413	0.0030991735537190084	0.0030991735537190084	0.0041109969167523125	0.004149377593360997	0.0036146804043878313	0.0005954622267657351
neg_757	0.0030991735537190084	0.004132231404958678	0.0041109969167523125	0.003112033195020747	0.003613608767612686	0.0005866816442748204
neg_2197	0.0030991735537190084	0.004132231404958678	0.0041109969167523125	0.003112033195020747	0.003613608767612686	0.0005866816442748204
neg_1382	0.0030991735537190084	0.004132231404958678	0.0041109969167523125	0.003112033195020747	0.003613608767612686	0.0005866816442748204
neg_2446	0.0030991735537190084	0.005165289256198347	0.0041109969167523125	0.0020746887966804984	0.003612537130837541	0.0013276572075361706
neg_1112	0.002066115702479339	0.002066115702479339	0.003083247687564234	0.006224066390041494	0.0033598863706411014	0.001968734045700299
K07121	0.0030991735537190084	0.004132231404958678	0.0020554984583761563	0.004149377593360997	0.0033590702526037097	0.0009981999761508253
neg_3940	0.0030991735537190084	0.0030991735537190084	0.003083247687564234	0.004149377593360997	0.003357743097090812	0.0005278097267813844
K06139	0.002066115702479339	0.004132231404958678	0.003083247687564234	0.004149377593360997	0.003357743097090812	0.0009950153049193037
K08302	0.0030991735537190084	0.0030991735537190084	0.003083247687564234	0.004149377593360997	0.003357743097090812	0.0005278097267813844
K02501	0.0030991735537190084	0.004132231404958678	0.003083247687564234	0.003112033195020747	0.003356671460315667	0.0005171740003739767
K07126	0.004132231404958678	0.0030991735537190084	0.003083247687564234	0.003112033195020747	0.003356671460315667	0.0005171740003739767
K15598	0.0030991735537190084	0.004132231404958678	0.003083247687564234	0.003112033195020747	0.003356671460315667	0.0005171740003739767
neg_1798	0.004132231404958678	0.0030991735537190084	0.003083247687564234	0.003112033195020747	0.003356671460315667	0.0005171740003739767
neg_2068	0.0030991735537190084	0.004132231404958678	0.003083247687564234	0.003112033195020747	0.003356671460315667	0.0005171740003739767
K01151	0.0030991735537190084	0.004132231404958678	0.003083247687564234	0.003112033195020747	0.003356671460315667	0.0005171740003739767
K03218	0.002066115702479339	0.0030991735537190084	0.0041109969167523125	0.004149377593360997	0.003356415941577914	0.0009881344345824767
K02919	0.0030991735537190084	0.007231404958677686	0.0020554984583761563	0.0010373443983402492	0.0033558553422782748	0.002717363390765862
neg_193	0.004132231404958678	0.006198347107438017	0.0020554984583761563	0.0010373443983402492	0.0033558553422782748	0.0022912107605933367
K03607	0.0010330578512396695	0.0030991735537190084	0.0051387461459403904	0.004149377593360997	0.0033550887860650165	0.0017578062611548755
K02458	0.0010330578512396695	0.006198347107438017	0.0041109969167523125	0.0020746887966804984	0.003354272668027624	0.002286683487426213
K10907	0.0030991735537190084	0.004132231404958678	0.0041109969167523125	0.0020746887966804984	0.003354272668027624	0.0009798404337625663
neg_552	0.0030991735537190084	0.005165289256198347	0.0041109969167523125	0.0010373443983402492	0.003353201031252479	0.0017593218620265342
K07341	0.006198347107438017	0.0010330578512396695	0.006166495375128468	0.0	0.0033494750834515384	0.0032983049819123346
neg_2788	0.004132231404958678	0.005165289256198347	0.0	0.003112033195020747	0.003102388464044443	0.002231669282838277
K06285	0.004132231404958678	0.0030991735537190084	0.0010277492291880781	0.004149377593360997	0.00310213294530669	0.001467526348332733
neg_2485	0.004132231404958678	0.0030991735537190084	0.0010277492291880781	0.004149377593360997	0.00310213294530669	0.001467526348332733
neg_1438	0.004132231404958678	0.0030991735537190084	0.0010277492291880781	0.004149377593360997	0.00310213294530669	0.001467526348332733
K12543	0.0010330578512396695	0.004132231404958678	0.0020554984583761563	0.0051867219917012455	0.003101877426568937	0.0018958840999989996
neg_3101	0.0010330578512396695	0.002066115702479339	0.003083247687564234	0.006224066390041494	0.003101621907831184	0.002243600344238441
neg_2135	0.004132231404958678	0.002066115702479339	0.0020554984583761563	0.004149377593360997	0.0031008057897937923	0.0012009152927047898
K07139	0.0030991735537190084	0.0030991735537190084	0.0020554984583761563	0.004149377593360997	0.0031008057897937923	0.0008548246550688719
K06179	0.0030991735537190084	0.0010330578512396695	0.003083247687564234	0.0051867219917012455	0.0031005502710560393	0.0016957730418862115
K00931	0.0030991735537190084	0.002066115702479339	0.003083247687564234	0.004149377593360997	0.0030994786342808944	0.0008505665386091118
neg_3360	0.002066115702479339	0.0030991735537190084	0.003083247687564234	0.004149377593360997	0.0030994786342808944	0.0008505665386091118
K18348	0.0030991735537190084	0.0030991735537190084	0.003083247687564234	0.003112033195020747	0.0030984069975057496	1.1784921912862834e-05
K00100	0.0030991735537190084	0.0030991735537190084	0.003083247687564234	0.003112033195020747	0.0030984069975057496	1.1784921912862834e-05
K07391	0.0030991735537190084	0.0030991735537190084	0.003083247687564234	0.003112033195020747	0.0030984069975057496	1.1784921912862834e-05
K06145	0.0030991735537190084	0.0030991735537190084	0.003083247687564234	0.003112033195020747	0.0030984069975057496	1.1784921912862834e-05
K02670	0.0030991735537190084	0.0030991735537190084	0.003083247687564234	0.003112033195020747	0.0030984069975057496	1.1784921912862834e-05
K03643	0.0010330578512396695	0.0010330578512396695	0.0051387461459403904	0.0051867219917012455	0.0030978959600302435	0.002384350121307941
K19334	0.004132231404958678	0.0030991735537190084	0.003083247687564234	0.0020746887966804984	0.0030973353607306048	0.0008400431851619509
neg_3637	0.0030991735537190084	0.004132231404958678	0.003083247687564234	0.0020746887966804984	0.0030973353607306048	0.0008400431851619509
neg_3807	0.0030991735537190084	0.0030991735537190084	0.0041109969167523125	0.0020746887966804984	0.0030960082052177065	0.0008313273438022156
K13014	0.0030991735537190084	0.0030991735537190084	0.0041109969167523125	0.0020746887966804984	0.0030960082052177065	0.0008313273438022156
neg_2461	0.0030991735537190084	0.0030991735537190084	0.0041109969167523125	0.0020746887966804984	0.0030960082052177065	0.0008313273438022156
neg_2932	0.0010330578512396695	0.0030991735537190084	0.0051387461459403904	0.003112033195020747	0.003095752686479954	0.0016761870436615043
K00887	0.005165289256198347	0.0010330578512396695	0.0010277492291880781	0.004149377593360997	0.002843868482496773	0.00213468754400849
neg_1791	0.0030991735537190084	0.0030991735537190084	0.0010277492291880781	0.004149377593360997	0.002843868482496773	0.0013080525651481044
neg_3158	0.002066115702479339	0.002066115702479339	0.0020554984583761563	0.0051867219917012455	0.0028436129637590198	0.0015620807035291152
K03651	0.0030991735537190084	0.002066115702479339	0.0020554984583761563	0.004149377593360997	0.002842541326983875	0.000999325498245534
K11933	0.0030991735537190084	0.0030991735537190084	0.0020554984583761563	0.003112033195020747	0.0028414696902087297	0.0005240158871449173
K02521	0.0030991735537190084	0.0030991735537190084	0.0020554984583761563	0.003112033195020747	0.0028414696902087297	0.0005240158871449173
K08169	0.0010330578512396695	0.006198347107438017	0.0020554984583761563	0.0020746887966804984	0.002840398053433585	0.0022909007323142776
neg_3656	0.004132231404958678	0.0030991735537190084	0.0020554984583761563	0.0020746887966804984	0.002840398053433585	0.0009896423946488962
K08314	0.002066115702479339	0.005165289256198347	0.0020554984583761563	0.0020746887966804984	0.002840398053433585	0.0015499473436099797
neg_3759	0.005165289256198347	0.002066115702479339	0.0020554984583761563	0.0020746887966804984	0.002840398053433585	0.0015499473436099797
K00783	0.0030991735537190084	0.002066115702479339	0.003083247687564234	0.003112033195020747	0.0028401425346958322	0.0005161521908411548
neg_1717	0.0030991735537190084	0.002066115702479339	0.003083247687564234	0.003112033195020747	0.0028401425346958322	0.0005161521908411548
neg_3689	0.0030991735537190084	0.0030991735537190084	0.003083247687564234	0.0020746887966804984	0.0028390708979206874	0.0005096433669419153
K00230	0.0030991735537190084	0.0030991735537190084	0.003083247687564234	0.0020746887966804984	0.0028390708979206874	0.0005096433669419153
K20452	0.005165289256198347	0.0010330578512396695	0.003083247687564234	0.0020746887966804984	0.0028390708979206874	0.0017622785701535252
neg_2462	0.0030991735537190084	0.0030991735537190084	0.003083247687564234	0.0020746887966804984	0.0028390708979206874	0.0005096433669419153
neg_1796	0.006198347107438017	0.0030991735537190084	0.0020554984583761563	0.0	0.0028382547798832952	0.0025837115880467903
K06287	0.0030991735537190084	0.002066115702479339	0.0041109969167523125	0.0020746887966804984	0.002837743742407789	0.0009776130581546267
K02778	0.004132231404958678	0.0010330578512396695	0.0041109969167523125	0.0020746887966804984	0.002837743742407789	0.001542294391532198
neg_112	0.0010330578512396695	0.004132231404958678	0.0051387461459403904	0.0010373443983402492	0.002835344950119747	0.0021188531738216
K01295	0.0030991735537190084	0.0030991735537190084	0.0010277492291880781	0.003112033195020747	0.0025845323829117106	0.0010378731399474609
K00919	0.0030991735537190084	0.0010330578512396695	0.0020554984583761563	0.004149377593360997	0.0025842768641739576	0.0013417086024833094
K16898	0.005165289256198347	0.002066115702479339	0.0010277492291880781	0.0020746887966804984	0.002583460746136566	0.00179002528567653
neg_2842	0.0030991735537190084	0.002066115702479339	0.0020554984583761563	0.003112033195020747	0.0025832052273988123	0.0006032518390519248
K05946	0.0030991735537190084	0.002066115702479339	0.0020554984583761563	0.003112033195020747	0.0025832052273988123	0.0006032518390519248
neg_2116	0.0030991735537190084	0.002066115702479339	0.0020554984583761563	0.003112033195020747	0.0025832052273988123	0.0006032518390519248
K05970	0.006198347107438017	0.002066115702479339	0.0010277492291880781	0.0010373443983402492	0.0025823891093614206	0.002459387375654597
K09775	0.0030991735537190084	0.0030991735537190084	0.0020554984583761563	0.0020746887966804984	0.0025821335906236675	0.0005970777247820258
neg_2833	0.0030991735537190084	0.0030991735537190084	0.0020554984583761563	0.0020746887966804984	0.0025821335906236675	0.0005970777247820258
neg_681	0.004132231404958678	0.002066115702479339	0.0020554984583761563	0.0020746887966804984	0.0025821335906236675	0.0010334283520251882
K06926	0.0030991735537190084	0.0030991735537190084	0.0020554984583761563	0.0020746887966804984	0.0025821335906236675	0.0005970777247820258
K03225	0.004132231404958678	0.002066115702479339	0.0020554984583761563	0.0020746887966804984	0.0025821335906236675	0.0010334283520251882
K00859	0.002066115702479339	0.002066115702479339	0.003083247687564234	0.003112033195020747	0.002581878071885915	0.0005956670181410935
neg_1432	0.002066115702479339	0.002066115702479339	0.003083247687564234	0.003112033195020747	0.002581878071885915	0.0005956670181410935
K15045	0.002066115702479339	0.005165289256198347	0.0020554984583761563	0.0010373443983402492	0.0025810619538485227	0.0017891041772320022
neg_769	0.002066115702479339	0.0030991735537190084	0.003083247687564234	0.0020746887966804984	0.00258080643511077	0.0005894102408363034
neg_2164	0.002066115702479339	0.0030991735537190084	0.003083247687564234	0.0020746887966804984	0.00258080643511077	0.0005894102408363034
neg_861	0.0030991735537190084	0.0030991735537190084	0.003083247687564234	0.0010373443983402492	0.002579734798335625	0.0010282876732389812
K18692	0.002066115702479339	0.002066115702479339	0.0041109969167523125	0.0020746887966804984	0.0025794792795978717	0.0010210197564498851
neg_708	0.0010330578512396695	0.0010330578512396695	0.0051387461459403904	0.003112033195020747	0.002579223760860119	0.00196776512597434
neg_2280	0.0	0.0030991735537190084	0.0051387461459403904	0.0020746887966804984	0.0025781521240849743	0.002139193677678939
neg_1330	0.002066115702479339	0.004132231404958678	0.0041109969167523125	0.0	0.002577336006047582	0.0019726312864993523
K02665	0.002066115702479339	0.002066115702479339	0.0051387461459403904	0.0010373443983402492	0.0025770804873098295	0.0017753016826215036
neg_763	0.0010330578512396695	0.002066115702479339	0.0010277492291880781	0.0051867219917012455	0.002328411193652083	0.0019670961144486023
K00009	0.0030991735537190084	0.0010330578512396695	0.0010277492291880781	0.004149377593360997	0.002327339556876938	0.001557738796936727
K01990	0.0030991735537190084	0.0010330578512396695	0.0010277492291880781	0.004149377593360997	0.002327339556876938	0.001557738796936727
K11068	0.0030991735537190084	0.002066115702479339	0.0010277492291880781	0.003112033195020747	0.0023262679201017933	0.0009947596280394974
K00059	0.002066115702479339	0.0010330578512396695	0.0020554984583761563	0.004149377593360997	0.0023260124013640402	0.0013085763484942238
neg_3362	0.002066115702479339	0.0010330578512396695	0.0020554984583761563	0.004149377593360997	0.0023260124013640402	0.0013085763484942238
neg_2738	0.0030991735537190084	0.0030991735537190084	0.0010277492291880781	0.0020746887966804984	0.0023251962833266485	0.0009906571033623157
K07672	0.002066115702479339	0.002066115702479339	0.0020554984583761563	0.003112033195020747	0.002324940764588895	0.0005247521560928837
neg_1863	0.002066115702479339	0.002066115702479339	0.0020554984583761563	0.003112033195020747	0.002324940764588895	0.0005247521560928837
neg_1852	0.002066115702479339	0.002066115702479339	0.0020554984583761563	0.003112033195020747	0.002324940764588895	0.0005247521560928837
K09761	0.002066115702479339	0.002066115702479339	0.0020554984583761563	0.003112033195020747	0.002324940764588895	0.0005247521560928837
neg_2803	0.0010330578512396695	0.0010330578512396695	0.003083247687564234	0.004149377593360997	0.0023246852458511423	0.0015536539505372911
neg_2298	0.0030991735537190084	0.004132231404958678	0.0010277492291880781	0.0010373443983402492	0.002324124646551503	0.0015498756389067754
neg_3458	0.0030991735537190084	0.002066115702479339	0.0020554984583761563	0.0020746887966804984	0.00232386912781375	0.0005169292133158283
K00848	0.002066115702479339	0.0030991735537190084	0.0020554984583761563	0.0020746887966804984	0.00232386912781375	0.0005169292133158283
K03407	0.0030991735537190084	0.002066115702479339	0.0020554984583761563	0.0020746887966804984	0.00232386912781375	0.0005169292133158283
K04565	0.002066115702479339	0.0030991735537190084	0.0020554984583761563	0.0020746887966804984	0.00232386912781375	0.0005169292133158283
neg_2754	0.0030991735537190084	0.0	0.003083247687564234	0.003112033195020747	0.0023236136090759975	0.001549120482587869
neg_842	0.002066115702479339	0.0010330578512396695	0.003083247687564234	0.003112033195020747	0.0023236136090759975	0.0009883468879376518
neg_59	0.0030991735537190084	0.0030991735537190084	0.0020554984583761563	0.0010373443983402492	0.0023227974910386053	0.0009881561967955436
K03769	0.004132231404958678	0.002066115702479339	0.0020554984583761563	0.0010373443983402492	0.0023227974910386053	0.0012992016851143815
neg_2310	0.0030991735537190084	0.0010330578512396695	0.003083247687564234	0.0020746887966804984	0.0023225419723008527	0.0009842137798981927
K05964	0.002066115702479339	0.002066115702479339	0.003083247687564234	0.0020746887966804984	0.0023225419723008527	0.0005071532462706641
neg_1993	0.0010330578512396695	0.0010330578512396695	0.0041109969167523125	0.003112033195020747	0.0023222864535630996	0.0015435247341569868
neg_794	0.002066115702479339	0.0030991735537190084	0.003083247687564234	0.0010373443983402492	0.0023214703355257074	0.0009830755211474047
K07031	0.0030991735537190084	0.0030991735537190084	0.003083247687564234	0.0	0.0023203986987505626	0.0015469506833724633
neg_3705	0.0010330578512396695	0.0030991735537190084	0.0041109969167523125	0.0010373443983402492	0.0023201431800128096	0.00154015224218845
neg_2373	0.002066115702479339	0.0030991735537190084	0.0041109969167523125	0.0	0.0023190715432376647	0.001757046306639936
neg_675	0.0030991735537190084	0.0010330578512396695	0.0	0.004149377593360997	0.0020704022495799186	0.001892366926374056
neg_412	0.0010330578512396695	0.0010330578512396695	0.0010277492291880781	0.0051867219917012455	0.0020701467308421656	0.0020777183476467518
K03584	0.002066115702479339	0.002066115702479339	0.0010277492291880781	0.003112033195020747	0.002068003457291876	0.0008509081579086562
neg_1884	0.0010330578512396695	0.0010330578512396695	0.0020554984583761563	0.004149377593360997	0.002067747938554123	0.0014690699124627117
neg_560	0.004132231404958678	0.0010330578512396695	0.0010277492291880781	0.0020746887966804984	0.002066931820516731	0.0014622264287317158
K01261	0.002066115702479339	0.0010330578512396695	0.0020554984583761563	0.003112033195020747	0.0020666763017789776	0.0008487762551654543
K00297	0.002066115702479339	0.002066115702479339	0.0020554984583761563	0.0020746887966804984	0.0020656046650038328	7.856614608575272e-06
K01159	0.002066115702479339	0.002066115702479339	0.0020554984583761563	0.0020746887966804984	0.0020656046650038328	7.856614608575272e-06
K03660	0.002066115702479339	0.002066115702479339	0.0020554984583761563	0.0020746887966804984	0.0020656046650038328	7.856614608575272e-06
K09789	0.0030991735537190084	0.0010330578512396695	0.0020554984583761563	0.0020746887966804984	0.0020656046650038328	0.0008435247926005038
K07720	0.002066115702479339	0.002066115702479339	0.0020554984583761563	0.0020746887966804984	0.0020656046650038328	7.856614608575272e-06
K12072	0.002066115702479339	0.002066115702479339	0.0020554984583761563	0.0020746887966804984	0.0020656046650038328	7.856614608575272e-06
neg_2056	0.002066115702479339	0.002066115702479339	0.0020554984583761563	0.0020746887966804984	0.0020656046650038328	7.856614608575272e-06
neg_71	0.002066115702479339	0.002066115702479339	0.0020554984583761563	0.0020746887966804984	0.0020656046650038328	7.856614608575272e-06
neg_985	0.002066115702479339	0.002066115702479339	0.0020554984583761563	0.0020746887966804984	0.0020656046650038328	7.856614608575272e-06
K18198	0.0010330578512396695	0.0010330578512396695	0.003083247687564234	0.003112033195020747	0.00206534914626608	0.0011920452415727881
K07166	0.0010330578512396695	0.0010330578512396695	0.003083247687564234	0.003112033195020747	0.00206534914626608	0.0011920452415727881
neg_726	0.0	0.002066115702479339	0.003083247687564234	0.003112033195020747	0.00206534914626608	0.0014602890834677024
neg_1727	0.004132231404958678	0.0010330578512396695	0.0020554984583761563	0.0010373443983402492	0.002064533028228688	0.0014599675478928597
neg_2109	0.004132231404958678	0.0010330578512396695	0.0020554984583761563	0.0010373443983402492	0.002064533028228688	0.0014599675478928597
neg_2801	0.0010330578512396695	0.004132231404958678	0.0020554984583761563	0.0010373443983402492	0.002064533028228688	0.0014599675478928597
K01684	0.0030991735537190084	0.002066115702479339	0.0020554984583761563	0.0010373443983402492	0.002064533028228688	0.0008417603829018442
neg_826	0.0030991735537190084	0.0010330578512396695	0.003083247687564234	0.0010373443983402492	0.00206320587271579	0.0011870567314274435
neg_1116	0.0010330578512396695	0.0010330578512396695	0.0041109969167523125	0.0020746887966804984	0.0020629503539780374	0.0014509754935585002
K06311	0.0	0.0	0.0051387461459403904	0.003112033195020747	0.0020626948352402844	0.002521416442268147
neg_3377	0.0	0.0	0.0051387461459403904	0.003112033195020747	0.0020626948352402844	0.002521416442268147
neg_2134	0.0010330578512396695	0.004132231404958678	0.003083247687564234	0.0	0.0020621342359406452	0.0018832038996393753
K01409	0.0010330578512396695	0.0010330578512396695	0.0010277492291880781	0.004149377593360997	0.0018108106312571034	0.0015590466498583715
K06167	0.0010330578512396695	0.0010330578512396695	0.0010277492291880781	0.004149377593360997	0.0018108106312571034	0.0015590466498583715
K01714	0.0010330578512396695	0.002066115702479339	0.0010277492291880781	0.003112033195020747	0.0018097389944819583	0.0009960657261534945
K03412	0.002066115702479339	0.0010330578512396695	0.0010277492291880781	0.003112033195020747	0.0018097389944819583	0.0009960657261534945
K01809	0.0030991735537190084	0.0010330578512396695	0.0010277492291880781	0.0020746887966804984	0.0018086673577068135	0.0009912243065877179
K15599	0.002066115702479339	0.002066115702479339	0.0010277492291880781	0.0020746887966804984	0.0018086673577068135	0.0005206277716677115
neg_2627	0.0030991735537190084	0.0010330578512396695	0.0010277492291880781	0.0020746887966804984	0.0018086673577068135	0.0009912243065877179
neg_2456	0.0010330578512396695	0.004132231404958678	0.0010277492291880781	0.0010373443983402492	0.0018075957209316685	0.001549762092029758
K02445	0.0010330578512396695	0.004132231404958678	0.0010277492291880781	0.0010373443983402492	0.0018075957209316685	0.001549762092029758
K00852	0.0030991735537190084	0.002066115702479339	0.0010277492291880781	0.0010373443983402492	0.0018075957209316685	0.0009893522341488
K00981	0.0030991735537190084	0.0	0.0020554984583761563	0.0020746887966804984	0.0018073402021939156	0.0012997909839232177
neg_685	0.002066115702479339	0.0010330578512396695	0.0020554984583761563	0.0020746887966804984	0.0018073402021939156	0.0005162479086745589
K07707	0.0010330578512396695	0.002066115702479339	0.0020554984583761563	0.0020746887966804984	0.0018073402021939156	0.0005162479086745589
K00640	0.0010330578512396695	0.002066115702479339	0.0020554984583761563	0.0020746887966804984	0.0018073402021939156	0.0005162479086745589
K03573	0.0030991735537190084	0.0030991735537190084	0.0010277492291880781	0.0	0.0018065240841565237	0.0015504735667626452
neg_1996	0.002066115702479339	0.002066115702479339	0.0020554984583761563	0.0010373443983402492	0.0018062685654187706	0.0005126405444812493
K05830	0.0010330578512396695	0.0030991735537190084	0.0020554984583761563	0.0010373443983402492	0.0018062685654187706	0.0009870525199727961
K05836	0.0030991735537190084	0.0010330578512396695	0.0020554984583761563	0.0010373443983402492	0.0018062685654187706	0.0009870525199727961
neg_3820	0.002066115702479339	0.002066115702479339	0.0020554984583761563	0.0010373443983402492	0.0018062685654187706	0.0005126405444812493
neg_580	0.0030991735537190084	0.0010330578512396695	0.0020554984583761563	0.0010373443983402492	0.0018062685654187706	0.0009870525199727961
K02493	0.0030991735537190084	0.0010330578512396695	0.0020554984583761563	0.0010373443983402492	0.0018062685654187706	0.0009870525199727961
neg_3440	0.0010330578512396695	0.0010330578512396695	0.003083247687564234	0.0020746887966804984	0.0018060130466810178	0.000982926659663105
neg_420	0.0010330578512396695	0.0010330578512396695	0.003083247687564234	0.0020746887966804984	0.0018060130466810178	0.000982926659663105
neg_3566	0.002066115702479339	0.0030991735537190084	0.0020554984583761563	0.0	0.0018051969286436258	0.0012992101343703968
K02744	0.002066115702479339	0.0010330578512396695	0.003083247687564234	0.0010373443983402492	0.0018049414099058727	0.0009810348874030432
neg_2570	0.0	0.0010330578512396695	0.0041109969167523125	0.0020746887966804984	0.00180468589116812	0.0017553986359705148
K02746	0.0	0.0010330578512396695	0.0041109969167523125	0.0020746887966804984	0.00180468589116812	0.0017553986359705148
neg_3586	0.0010330578512396695	0.0010330578512396695	0.0041109969167523125	0.0010373443983402492	0.0018036142543929753	0.0015382564354632865
neg_1004	0.0010330578512396695	0.0010330578512396695	0.0041109969167523125	0.0010373443983402492	0.0018036142543929753	0.0015382564354632865
neg_1649	0.0010330578512396695	0.0010330578512396695	0.0051387461459403904	0.0	0.0018012154621049323	0.002277690382582725
K03501	0.0030991735537190084	0.0	0.0	0.003112033195020747	0.0015528016871849389	0.0017930286300079702
K12231	0.0010330578512396695	0.0010330578512396695	0.0010277492291880781	0.003112033195020747	0.001551474531672041	0.001040375451990876
neg_3762	0.0010330578512396695	0.0010330578512396695	0.0010277492291880781	0.003112033195020747	0.001551474531672041	0.001040375451990876
K00817	0.0	0.0	0.0020554984583761563	0.004149377593360997	0.0015512190129342881	0.001984715480895414
K15792	0.0010330578512396695	0.002066115702479339	0.0010277492291880781	0.0020746887966804984	0.0015504028948968962	0.0006004576463523949
K16199	0.002066115702479339	0.0010330578512396695	0.0010277492291880781	0.0020746887966804984	0.0015504028948968962	0.0006004576463523949
neg_1874	0.002066115702479339	0.0010330578512396695	0.0010277492291880781	0.0020746887966804984	0.0015504028948968962	0.0006004576463523949
neg_2251	0.002066115702479339	0.0010330578512396695	0.0010277492291880781	0.0020746887966804984	0.0015504028948968962	0.0006004576463523949
K03101	0.002066115702479339	0.0010330578512396695	0.0010277492291880781	0.0020746887966804984	0.0015504028948968962	0.0006004576463523949
K01299	0.0030991735537190084	0.0030991735537190084	0.0	0.0	0.0015495867768595042	0.0017893086855050387
K02566	0.0010330578512396695	0.0030991735537190084	0.0010277492291880781	0.0010373443983402492	0.0015493312581217511	0.0010332356506578897
K01191	0.0	0.004132231404958678	0.0010277492291880781	0.0010373443983402492	0.0015493312581217511	0.0017894113439358426
K06907	0.0030991735537190084	0.0010330578512396695	0.0010277492291880781	0.0010373443983402492	0.0015493312581217511	0.0010332356506578897
K07454	0.0010330578512396695	0.0010330578512396695	0.0020554984583761563	0.0020746887966804984	0.0015490757393839983	0.0005958976360868955
neg_3852	0.0010330578512396695	0.0010330578512396695	0.0020554984583761563	0.0020746887966804984	0.0015490757393839983	0.0005958976360868955
K07493	0.0010330578512396695	0.004132231404958678	0.0010277492291880781	0.0	0.0015482596213466063	0.0017898214031817096
neg_2157	0.0010330578512396695	0.002066115702479339	0.0020554984583761563	0.0010373443983402492	0.0015480041026088532	0.0005921523245525307
K07574	0.002066115702479339	0.0010330578512396695	0.0020554984583761563	0.0010373443983402492	0.0015480041026088532	0.0005921523245525307
neg_1804	0.002066115702479339	0.002066115702479339	0.0020554984583761563	0.0	0.0015469324658337084	0.0010313004555816423
neg_2282	0.0010330578512396695	0.0010330578512396695	0.003083247687564234	0.0010373443983402492	0.0015466769470959553	0.0010243824866623592
neg_2705	0.0030991735537190084	0.0	0.0	0.0020746887966804984	0.0012934655875998767	0.001551020891103932
neg_1901	0.0	0.0010330578512396695	0.0010277492291880781	0.003112033195020747	0.0012932100688621236	0.0013062233704067279
neg_1737	0.0010330578512396695	0.0010330578512396695	0.0010277492291880781	0.0020746887966804984	0.0012921384320869788	0.000521706245084123
K03524	0.0010330578512396695	0.0010330578512396695	0.0010277492291880781	0.0020746887966804984	0.0012921384320869788	0.000521706245084123
K00575	0.0010330578512396695	0.0010330578512396695	0.0010277492291880781	0.0020746887966804984	0.0012921384320869788	0.000521706245084123
K05787	0.0010330578512396695	0.0010330578512396695	0.0010277492291880781	0.0020746887966804984	0.0012921384320869788	0.000521706245084123
neg_2038	0.0	0.002066115702479339	0.0010277492291880781	0.0020746887966804984	0.0012921384320869788	0.00099179118543088
neg_3564	0.0010330578512396695	0.0010330578512396695	0.0010277492291880781	0.0020746887966804984	0.0012921384320869788	0.000521706245084123
neg_3294	0.0	0.0	0.0020554984583761563	0.003112033195020747	0.001291882913349226	0.001552844558874998
neg_1450	0.002066115702479339	0.0030991735537190084	0.0	0.0	0.0012913223140495868	0.0015495867768595042
K02747	0.0010330578512396695	0.002066115702479339	0.0010277492291880781	0.0010373443983402492	0.0012910667953118338	0.0005167141760125941
K17329	0.002066115702479339	0.0010330578512396695	0.0010277492291880781	0.0010373443983402492	0.0012910667953118338	0.0005167141760125941
K05989	0.002066115702479339	0.0010330578512396695	0.0010277492291880781	0.0010373443983402492	0.0012910667953118338	0.0005167141760125941
K09512	0.0	0.0030991735537190084	0.0010277492291880781	0.0010373443983402492	0.0012910667953118338	0.0012999762453097382
neg_781	0.0010330578512396695	0.002066115702479339	0.0010277492291880781	0.0010373443983402492	0.0012910667953118338	0.0005167141760125941
neg_1065	0.002066115702479339	0.0010330578512396695	0.0010277492291880781	0.0010373443983402492	0.0012910667953118338	0.0005167141760125941
neg_64	0.002066115702479339	0.002066115702479339	0.0010277492291880781	0.0	0.001289995158536689	0.0009895430989380373
K20525	0.002066115702479339	0.002066115702479339	0.0010277492291880781	0.0	0.001289995158536689	0.0009895430989380373
neg_2892	0.0	0.004132231404958678	0.0010277492291880781	0.0	0.001289995158536689	0.001955782437289576
K01729	0.0010330578512396695	0.0010330578512396695	0.0020554984583761563	0.0010373443983402492	0.0012897396397989359	0.0005105098782249426
neg_94	0.0010330578512396695	0.0010330578512396695	0.0020554984583761563	0.0010373443983402492	0.0012897396397989359	0.0005105098782249426
neg_207	0.002066115702479339	0.0010330578512396695	0.0020554984583761563	0.0	0.001288668003023791	0.0009863156432496762
neg_3422	0.0010330578512396695	0.0	0.003083247687564234	0.0010373443983402492	0.001288412484286038	0.0012922436959270404
neg_846	0.0010330578512396695	0.0010330578512396695	0.003083247687564234	0.0	0.0012873408475108932	0.0012925230520453377
K17680	0.0010330578512396695	0.0010330578512396695	0.003083247687564234	0.0	0.0012873408475108932	0.0012925230520453377
neg_1188	0.0010330578512396695	0.0010330578512396695	0.003083247687564234	0.0	0.0012873408475108932	0.0012925230520453377
K04070	0.0	0.002066115702479339	0.0	0.0020746887966804984	0.0010352011247899593	0.0011953524200053135
K00945	0.002066115702479339	0.0010330578512396695	0.0	0.0010373443983402492	0.0010341294880148143	0.0008434909264243017
neg_416	0.0010330578512396695	0.0	0.0010277492291880781	0.0020746887966804984	0.0010338739692770614	0.0008470004068832869
K18298	0.0010330578512396695	0.0	0.0010277492291880781	0.0020746887966804984	0.0010338739692770614	0.0008470004068832869
neg_3666	0.0010330578512396695	0.0	0.0010277492291880781	0.0020746887966804984	0.0010338739692770614	0.0008470004068832869
neg_396	0.0030991735537190084	0.0010330578512396695	0.0	0.0	0.0010330578512396695	0.0014609644239391478
K00883	0.002066115702479339	0.002066115702479339	0.0	0.0	0.0010330578512396695	0.001192872457003359
K00949	0.002066115702479339	0.002066115702479339	0.0	0.0	0.0010330578512396695	0.001192872457003359
K00849	0.002066115702479339	0.002066115702479339	0.0	0.0	0.0010330578512396695	0.001192872457003359
K01649	0.002066115702479339	0.002066115702479339	0.0	0.0	0.0010330578512396695	0.001192872457003359
K17331	0.0010330578512396695	0.0010330578512396695	0.0010277492291880781	0.0010373443983402492	0.0010328023325019164	3.928307304287636e-06
neg_497	0.0010330578512396695	0.0010330578512396695	0.0010277492291880781	0.0010373443983402492	0.0010328023325019164	3.928307304287636e-06
K19157	0.0	0.002066115702479339	0.0010277492291880781	0.0010373443983402492	0.0010328023325019164	0.0008434973508772225
K09951	0.0010330578512396695	0.0010330578512396695	0.0010277492291880781	0.0010373443983402492	0.0010328023325019164	3.928307304287636e-06
neg_176	0.0010330578512396695	0.0010330578512396695	0.0010277492291880781	0.0010373443983402492	0.0010328023325019164	3.928307304287636e-06
K07053	0.0010330578512396695	0.0010330578512396695	0.0010277492291880781	0.0010373443983402492	0.0010328023325019164	3.928307304287636e-06
K07099	0.0010330578512396695	0.0010330578512396695	0.0010277492291880781	0.0010373443983402492	0.0010328023325019164	3.928307304287636e-06
K15652	0.0010330578512396695	0.0010330578512396695	0.0010277492291880781	0.0010373443983402492	0.0010328023325019164	3.928307304287636e-06
neg_1307	0.0010330578512396695	0.0010330578512396695	0.0010277492291880781	0.0010373443983402492	0.0010328023325019164	3.928307304287636e-06
neg_3529	0.0010330578512396695	0.0010330578512396695	0.0010277492291880781	0.0010373443983402492	0.0010328023325019164	3.928307304287636e-06
neg_2973	0.0	0.002066115702479339	0.0010277492291880781	0.0010373443983402492	0.0010328023325019164	0.0008434973508772225
neg_3487	0.0010330578512396695	0.0010330578512396695	0.0010277492291880781	0.0010373443983402492	0.0010328023325019164	3.928307304287636e-06
K08688	0.0010330578512396695	0.0010330578512396695	0.0010277492291880781	0.0010373443983402492	0.0010328023325019164	3.928307304287636e-06
neg_3198	0.0010330578512396695	0.0010330578512396695	0.0010277492291880781	0.0010373443983402492	0.0010328023325019164	3.928307304287636e-06
K15520	0.0010330578512396695	0.002066115702479339	0.0010277492291880781	0.0	0.0010317306957267716	0.0008434923797555238
neg_3592	0.0010330578512396695	0.002066115702479339	0.0010277492291880781	0.0	0.0010317306957267716	0.0008434923797555238
K16014	0.0010330578512396695	0.0010330578512396695	0.0020554984583761563	0.0	0.0010304035402138737	0.0008391593288646013
K01524	0.0010330578512396695	0.0010330578512396695	0.0020554984583761563	0.0	0.0010304035402138737	0.0008391593288646013
K05802	0.0	0.0	0.003083247687564234	0.0010373443983402492	0.0010301480214761208	0.001453464816571472
neg_3252	0.0	0.0	0.0	0.003112033195020747	0.0007780082987551868	0.0015560165975103736
neg_1062	0.0	0.0	0.0	0.003112033195020747	0.0007780082987551868	0.0015560165975103736
K13665	0.0010330578512396695	0.0010330578512396695	0.0	0.0010373443983402492	0.000775865025204897	0.0005172472972183156
neg_1886	0.0010330578512396695	0.0010330578512396695	0.0	0.0010373443983402492	0.000775865025204897	0.0005172472972183156
neg_783	0.002066115702479339	0.0	0.0	0.0010373443983402492	0.000775865025204897	0.0009894529376469948
K14051	0.0	0.0	0.0010277492291880781	0.0020746887966804984	0.0007756095064671441	0.000992357740447707
K02802	0.0030991735537190084	0.0	0.0	0.0	0.0007747933884297521	0.0015495867768595042
neg_3623	0.0010330578512396695	0.002066115702479339	0.0	0.0	0.0007747933884297521	0.0009890775906573742
K20885	0.002066115702479339	0.0010330578512396695	0.0	0.0	0.0007747933884297521	0.0009890775906573742
neg_3496	0.0	0.0010330578512396695	0.0010277492291880781	0.0010373443983402492	0.0007745378696919991	0.0005163734941959564
neg_2965	0.0010330578512396695	0.0010330578512396695	0.0010277492291880781	0.0	0.0007734662329168542	0.0005156502277908211
neg_1718	0.0010330578512396695	0.0010330578512396695	0.0010277492291880781	0.0	0.0007734662329168542	0.0005156502277908211
K10942	0.0010330578512396695	0.0010330578512396695	0.0010277492291880781	0.0	0.0007734662329168542	0.0005156502277908211
K21217	0.0	0.0	0.0020554984583761563	0.0010373443983402492	0.0007732107141791014	0.0009848414557801042
neg_637	0.0010330578512396695	0.0	0.0020554984583761563	0.0	0.0007721390774039564	0.00098446049810336
neg_771	0.0	0.0	0.0	0.0020746887966804984	0.0005186721991701246	0.0010373443983402492
neg_1139	0.0010330578512396695	0.0	0.0	0.0010373443983402492	0.0005176005623949797	0.0005976762100026568
neg_1109	0.0010330578512396695	0.0010330578512396695	0.0	0.0	0.0005165289256198347	0.0005964362285016795
neg_1354	0.0	0.0	0.0010277492291880781	0.0010373443983402492	0.0005162734068820819	0.000596154050630667
K03414	0.0	0.0	0.0010277492291880781	0.0010373443983402492	0.0005162734068820819	0.000596154050630667
neg_302	0.0	0.0	0.0010277492291880781	0.0010373443983402492	0.0005162734068820819	0.000596154050630667
neg_2684	0.0	0.0	0.0010277492291880781	0.0010373443983402492	0.0005162734068820819	0.000596154050630667
K00344	0.0	0.0	0.0010277492291880781	0.0010373443983402492	0.0005162734068820819	0.000596154050630667
K02852	0.0	0.0	0.0010277492291880781	0.0010373443983402492	0.0005162734068820819	0.000596154050630667
neg_1554	0.0	0.0	0.0010277492291880781	0.0010373443983402492	0.0005162734068820819	0.000596154050630667
neg_3723	0.0010330578512396695	0.0	0.0010277492291880781	0.0	0.0005152017701069368	0.0005949077089261627
neg_1563	0.0010330578512396695	0.0	0.0010277492291880781	0.0	0.0005152017701069368	0.0005949077089261627
K06305	0.0010330578512396695	0.0	0.0010277492291880781	0.0	0.0005152017701069368	0.0005949077089261627
K08714	0.0	0.0010330578512396695	0.0010277492291880781	0.0	0.0005152017701069368	0.0005949077089261627
neg_2851	0.0	0.0010330578512396695	0.0010277492291880781	0.0	0.0005152017701069368	0.0005949077089261627
neg_3608	0.0	0.0010330578512396695	0.0010277492291880781	0.0	0.0005152017701069368	0.0005949077089261627
neg_3889	0.0	0.0	0.0	0.0010373443983402492	0.0002593360995850623	0.0005186721991701246
neg_26	0.0	0.0	0.0	0.0010373443983402492	0.0002593360995850623	0.0005186721991701246
K03470	0.0	0.0	0.0	0.0010373443983402492	0.0002593360995850623	0.0005186721991701246
K02461	0.0010330578512396695	0.0	0.0	0.0	0.00025826446280991736	0.0005165289256198347
K04085	0.0	0.0	0.0010277492291880781	0.0	0.00025693730729701953	0.0005138746145940391
K01909	0.0	0.0	0.0010277492291880781	0.0	0.00025693730729701953	0.0005138746145940391
neg_3088	0.0	0.0	0.0010277492291880781	0.0	0.00025693730729701953	0.0005138746145940391
neg_2972	0.0	0.0	0.0010277492291880781	0.0	0.00025693730729701953	0.0005138746145940391
K14170	0.0	0.0	0.0010277492291880781	0.0	0.00025693730729701953	0.0005138746145940391
neg_430	0.0	0.0	0.0	0.0	0.0	0.0
neg_483	0.0	0.0	0.0	0.0	0.0	0.0
K03415	0.0	0.0	0.0	0.0	0.0	0.0
K14571	0.0	0.0	0.0	0.0	0.0	0.0
neg_392	0.0	0.0	0.0	0.0	0.0	0.0
