# Supplementary material for: Multi-omics analyses reveal that the gut microbiome and its metabolites promote milk fat synthesis in Zhongdian yak cows
Source: PeerJ journal article supplement (doi:10.7717/peerj.14444), 2022-12-02
Supplement: neg_biomarker_Web_Report.zip [file treat1_H_L.vs.H_L_feature_importance_kfold_summary.xls]

	0	1	2	3	mean	std
Palleronia	0.010330578512396695	0.010330578512396695	0.010277492291880781	0.01244813278008299	0.010846695524189291	0.0010679180904854448
neg_2803	0.009297520661157025	0.008264462809917356	0.011305241521068859	0.01244813278008299	0.010328839443056558	0.0018947325738883974
neg_3498	0.009297520661157025	0.010330578512396695	0.007194244604316547	0.009336099585062242	0.009039610840733127	0.0013198986232247395
neg_1438	0.009297520661157025	0.008264462809917356	0.007194244604316547	0.009336099585062242	0.008523081915113292	0.0010154548312884036
Candidatus_Kryptobacter	0.008264462809917356	0.007231404958677686	0.008221993833504625	0.010373443983402491	0.00852282639637554	0.001322851308959812
Natronolimnobius	0.008264462809917356	0.009297520661157025	0.008221993833504625	0.008298755186721993	0.008520683122825251	0.0005188425291248146
neg_1886	0.011363636363636364	0.009297520661157025	0.007194244604316547	0.006224066390041495	0.008519867004787858	0.0022890860320872665
neg_552	0.009297520661157025	0.007231404958677686	0.007194244604316547	0.009336099585062242	0.008264817452303376	0.0012149333219527323
neg_3351	0.009297520661157025	0.008264462809917356	0.008221993833504625	0.007261410788381745	0.008261347023240188	0.0008316823639197985
neg_985	0.008264462809917356	0.008264462809917356	0.008221993833504625	0.007261410788381745	0.00800308256043027	0.0004948529857700153
neg_727	0.010330578512396695	0.008264462809917356	0.0051387461459403904	0.006224066390041495	0.007489463464573984	0.0022948972648469904
Candidatus_Sulfopaludibacter	0.008264462809917356	0.004132231404958678	0.009249743062692703	0.008298755186721993	0.0074862981160726825	0.0022821866973553556
Thermobifida	0.008264462809917356	0.007231404958677686	0.0051387461459403904	0.008298755186721993	0.007233342275314357	0.0014816264629406678
neg_1532	0.007231404958677686	0.007231404958677686	0.006166495375128468	0.008298755186721993	0.007232015119801458	0.000870491708031504
neg_1363	0.007231404958677686	0.007231404958677686	0.0051387461459403904	0.007261410788381745	0.006715741712919377	0.0010514255282297012
Mailhella	0.006198347107438017	0.008264462809917356	0.006166495375128468	0.006224066390041495	0.006713342920631334	0.0010343480007479534
Jiangella	0.006198347107438017	0.006198347107438017	0.006166495375128468	0.007261410788381745	0.006456150094596561	0.0005370504016822729
neg_71	0.007231404958677686	0.006198347107438017	0.006166495375128468	0.006224066390041495	0.006455078457821417	0.000518086412765909
Mycolicibacter	0.008264462809917356	0.007231404958677686	0.006166495375128468	0.004149377593360997	0.006452935184271126	0.001758415277747308
neg_497	0.005165289256198347	0.007231404958677686	0.0051387461459403904	0.007261410788381745	0.006199212787299542	0.00120930732759952
neg_1563	0.007231404958677686	0.006198347107438017	0.0051387461459403904	0.006224066390041495	0.0061981411505243975	0.0008545220951774259
Thermosyntropha	0.006198347107438017	0.006198347107438017	0.006166495375128468	0.006224066390041495	0.006196813995011499	2.3569843825726e-05
neg_911	0.007231404958677686	0.005165289256198347	0.006166495375128468	0.006224066390041495	0.006196813995011499	0.0008438174487865159
neg_1382	0.006198347107438017	0.006198347107438017	0.007194244604316547	0.0051867219917012455	0.006194415202723456	0.0008195802502052745
Novimethylophilus	0.007231404958677686	0.006198347107438017	0.007194244604316547	0.004149377593360997	0.006193343565948311	0.001444206388321294
neg_1062	0.005165289256198347	0.005165289256198347	0.0041109969167523125	0.009336099585062242	0.005944418753552812	0.0023150968332362153
Ottowia	0.007231404958677686	0.006198347107438017	0.0041109969167523125	0.006224066390041495	0.005941203843227378	0.0013115398317430286
Chloroflexus	0.006198347107438017	0.005165289256198347	0.0051387461459403904	0.007261410788381745	0.005940948324489625	0.0010091333868726161
Ktedonobacter	0.005165289256198347	0.004132231404958678	0.006166495375128468	0.008298755186721993	0.0059406928057518715	0.0017779415340689767
neg_842	0.005165289256198347	0.004132231404958678	0.006166495375128468	0.008298755186721993	0.0059406928057518715	0.0017779415340689767
neg_1998	0.005165289256198347	0.008264462809917356	0.003083247687564234	0.006224066390041495	0.005684266535930359	0.0021589683617589724
neg_1413	0.006198347107438017	0.0030991735537190084	0.006166495375128468	0.007261410788381745	0.005681356706166809	0.0017950746816996965
neg_2056	0.006198347107438017	0.005165289256198347	0.006166495375128468	0.0051867219917012455	0.00567921343261652	0.0005812656714199311
neg_1361	0.006198347107438017	0.006198347107438017	0.006166495375128468	0.004149377593360997	0.005678141795841375	0.0010192867338838305
neg_3608	0.005165289256198347	0.007231404958677686	0.007194244604316547	0.0031120331950207475	0.005675743003553332	0.0019629146900036775
neg_2705	0.006198347107438017	0.005165289256198347	0.0041109969167523125	0.006224066390041495	0.005424674917607543	0.0010050914045984214
Anoxybacillus	0.007231404958677686	0.005165289256198347	0.0041109969167523125	0.0051867219917012455	0.005423603280832398	0.0013056187873835734
neg_1496	0.005165289256198347	0.005165289256198347	0.0051387461459403904	0.006224066390041495	0.0054233477620946454	0.0005339590452427224
neg_3355	0.004132231404958678	0.007231404958677686	0.0051387461459403904	0.0051867219917012455	0.0054222761253195	0.0013003893667270262
neg_136	0.007231404958677686	0.005165289256198347	0.0051387461459403904	0.004149377593360997	0.005421204488544355	0.0012961024541339268
neg_1852	0.005165289256198347	0.005165289256198347	0.006166495375128468	0.0051867219917012455	0.005420948969806601	0.0004971336165409434
Propionicimonas	0.005165289256198347	0.005165289256198347	0.006166495375128468	0.0051867219917012455	0.005420948969806601	0.0004971336165409434
neg_994	0.004132231404958678	0.004132231404958678	0.0051387461459403904	0.007261410788381745	0.005166154936059873	0.0014752224764188842
neg_59	0.005165289256198347	0.006198347107438017	0.0041109969167523125	0.0051867219917012455	0.00516533881802248	0.0008522910718270208
neg_2164	0.006198347107438017	0.005165289256198347	0.0041109969167523125	0.0051867219917012455	0.00516533881802248	0.0008522910718270208
Marmoricola	0.007231404958677686	0.004132231404958678	0.0041109969167523125	0.0051867219917012455	0.00516533881802248	0.0014660643811897492
Negativicoccus	0.005165289256198347	0.005165289256198347	0.0051387461459403904	0.0051867219917012455	0.005164011662509583	1.9641536521438104e-05
Parafilimonas	0.004132231404958678	0.004132231404958678	0.006166495375128468	0.006224066390041495	0.00516375614377183	0.0011913340362821872
neg_3414	0.006198347107438017	0.005165289256198347	0.0051387461459403904	0.004149377593360997	0.005162940025734438	0.0008366535507333066
neg_1993	0.004132231404958678	0.004132231404958678	0.007194244604316547	0.0051867219917012455	0.005161357351483787	0.0014435459091332117
neg_3504	0.004132231404958678	0.006198347107438017	0.007194244604316547	0.0031120331950207475	0.005159214077933497	0.0018678677392749239
Anaerobacterium	0.004132231404958678	0.004132231404958678	0.003083247687564234	0.008298755186721993	0.004911616421050896	0.002311602853009262
neg_302	0.005165289256198347	0.005165289256198347	0.0041109969167523125	0.0051867219917012455	0.004907074355212563	0.0005308144555935834
neg_3807	0.006198347107438017	0.004132231404958678	0.0041109969167523125	0.0051867219917012455	0.004907074355212563	0.0009966124299875692
Harryflintia	0.0030991735537190084	0.008264462809917356	0.0041109969167523125	0.004149377593360997	0.0049060027184374185	0.0022911715795745453
Caldicellulosiruptor	0.005165289256198347	0.006198347107438017	0.0041109969167523125	0.004149377593360997	0.0049060027184374185	0.000990269211385683
neg_1781	0.005165289256198347	0.004132231404958678	0.0051387461459403904	0.0051867219917012455	0.004905747199699665	0.0005160504195311947
neg_2116	0.004132231404958678	0.005165289256198347	0.0051387461459403904	0.0051867219917012455	0.004905747199699665	0.0005160504195311947
Acidaminobacter	0.004132231404958678	0.005165289256198347	0.0051387461459403904	0.0051867219917012455	0.004905747199699665	0.0005160504195311947
neg_685	0.0030991735537190084	0.002066115702479339	0.007194244604316547	0.007261410788381745	0.00490523616222416	0.0027149945148932392
Melghirimyces	0.006198347107438017	0.004132231404958678	0.006166495375128468	0.0031120331950207475	0.004902276770636477	0.001535793923145917
neg_3564	0.0030991735537190084	0.004132231404958678	0.003083247687564234	0.008298755186721993	0.004653351958240978	0.0024793298330498415
neg_1432	0.0030991735537190084	0.0030991735537190084	0.0041109969167523125	0.008298755186721993	0.0046520248027280805	0.0024775019455119084
neg_2197	0.007231404958677686	0.004132231404958678	0.003083247687564234	0.004149377593360997	0.004649065411140399	0.0017923046604324197
neg_2485	0.004132231404958678	0.005165289256198347	0.0041109969167523125	0.0051867219917012455	0.004648809892402645	0.0006088777902191328
Parapedobacter	0.004132231404958678	0.005165289256198347	0.0041109969167523125	0.0051867219917012455	0.004648809892402645	0.0006088777902191328
neg_2280	0.004132231404958678	0.005165289256198347	0.0051387461459403904	0.004149377593360997	0.004646411100114604	0.0005839667239251377
neg_2643	0.006198347107438017	0.006198347107438017	0.0041109969167523125	0.0020746887966804984	0.004645594982077211	0.0019763123935910873
neg_677	0.004132231404958678	0.006198347107438017	0.0051387461459403904	0.0031120331950207475	0.004645339463339458	0.0013253415772427066
neg_2068	0.0030991735537190084	0.0030991735537190084	0.0041109969167523125	0.007261410788381745	0.004392688703143018	0.0019710639722778536
neg_410	0.006198347107438017	0.0030991735537190084	0.003083247687564234	0.0051867219917012455	0.004391872585105626	0.0015576377078998574
Larkinella	0.004132231404958678	0.005165289256198347	0.003083247687564234	0.0051867219917012455	0.004391872585105626	0.0010016439139705741
neg_2505	0.004132231404958678	0.004132231404958678	0.0041109969167523125	0.0051867219917012455	0.004390545429592729	0.0005308787556895665
Variovorax	0.004132231404958678	0.004132231404958678	0.0041109969167523125	0.0051867219917012455	0.004390545429592729	0.0005308787556895665
Caloramator	0.0030991735537190084	0.0030991735537190084	0.0051387461459403904	0.006224066390041495	0.004390289910854976	0.0015553012362866175
Candidatus_Symbiobacter	0.0030991735537190084	0.008264462809917356	0.003083247687564234	0.0031120331950207475	0.004389729311555336	0.002583182497582344
neg_919	0.005165289256198347	0.004132231404958678	0.0041109969167523125	0.004149377593360997	0.004389473792817584	0.0005174484949662881
Comamonas	0.004132231404958678	0.004132231404958678	0.0051387461459403904	0.004149377593360997	0.0043881466373046855	0.0005004649474916191
neg_2886	0.0030991735537190084	0.006198347107438017	0.0051387461459403904	0.0031120331950207475	0.004387075000529541	0.0015416590520820651
neg_2446	0.0010330578512396695	0.006198347107438017	0.006166495375128468	0.004149377593360997	0.004386819481791787	0.0024326237103690024
Litorimonas	0.004132231404958678	0.004132231404958678	0.006166495375128468	0.0031120331950207475	0.004385747845016642	0.0012808788579686033
Izhakiella	0.002066115702479339	0.005165289256198347	0.007194244604316547	0.0031120331950207475	0.004384420689503745	0.002272911062909162
neg_763	0.002066115702479339	0.0030991735537190084	0.0020554984583761563	0.009336099585062242	0.004139221824909186	0.0034989956141475314
neg_3889	0.002066115702479339	0.005165289256198347	0.0020554984583761563	0.007261410788381745	0.004137078551358897	0.0025456192426590433
Promicromonospora	0.007231404958677686	0.007231404958677686	0.0	0.0020746887966804984	0.0041343746785089674	0.0036750761001945486
neg_2038	0.005165289256198347	0.0030991735537190084	0.003083247687564234	0.0051867219917012455	0.004133608122295709	0.0012037063184875691
Pacificibacter	0.005165289256198347	0.006198347107438017	0.0020554984583761563	0.0031120331950207475	0.0041327920042583165	0.0018876498158587921
Microscilla	0.0030991735537190084	0.004132231404958678	0.0041109969167523125	0.0051867219917012455	0.00413228096678281	0.0008523711662573013
neg_396	0.007231404958677686	0.0030991735537190084	0.003083247687564234	0.0031120331950207475	0.004131464848745419	0.0020666602782077126
Kriegella	0.005165289256198347	0.005165289256198347	0.003083247687564234	0.0031120331950207475	0.004131464848745419	0.0011938154414176082
neg_344	0.006198347107438017	0.004132231404958678	0.003083247687564234	0.0031120331950207475	0.004131464848745419	0.0014617344688778924
Sinirhodobacter	0.004132231404958678	0.004132231404958678	0.0041109969167523125	0.004149377593360997	0.0041312093300076656	1.5713229217150543e-05
neg_1401	0.005165289256198347	0.004132231404958678	0.0041109969167523125	0.0031120331950207475	0.004130137693232521	0.0008383408774762006
neg_3064	0.0030991735537190084	0.006198347107438017	0.0041109969167523125	0.0031120331950207475	0.004130137693232521	0.0014579986713041946
neg_2134	0.004132231404958678	0.005165289256198347	0.0041109969167523125	0.0031120331950207475	0.004130137693232521	0.0008383408774762006
neg_2415	0.0030991735537190084	0.007231404958677686	0.0041109969167523125	0.0020746887966804984	0.004129066056457376	0.0022290489489708576
neg_3592	0.004132231404958678	0.006198347107438017	0.0041109969167523125	0.0020746887966804984	0.004129066056457376	0.0016835207658036885
neg_3440	0.0030991735537190084	0.0030991735537190084	0.006166495375128468	0.004149377593360997	0.004128555018981871	0.0014460160069270937
Marivita	0.002066115702479339	0.004132231404958678	0.006166495375128468	0.004149377593360997	0.004128555018981871	0.0016740473833281996
neg_3723	0.002066115702479339	0.002066115702479339	0.003083247687564234	0.008298755186721993	0.0038785585698112262	0.002985551642285132
Erythrobacter	0.0030991735537190084	0.0030991735537190084	0.003083247687564234	0.006224066390041495	0.003876415296260936	0.0015651187352523689
neg_758	0.005165289256198347	0.004132231404958678	0.0020554984583761563	0.004149377593360997	0.0038755991782235444	0.001305996662579942
neg_3360	0.004132231404958678	0.0030991735537190084	0.003083247687564234	0.0051867219917012455	0.0038753436594857913	0.0010025900634188605
Anaerotignum	0.004132231404958678	0.004132231404958678	0.003083247687564234	0.004149377593360997	0.0038742720227106465	0.0005274114963910218
neg_560	0.006198347107438017	0.0030991735537190084	0.003083247687564234	0.0031120331950207475	0.0038732003859355017	0.001550142528037782
neg_2032	0.0030991735537190084	0.004132231404958678	0.0041109969167523125	0.004149377593360997	0.0038729448671977486	0.0005160863573143027
neg_3637	0.004132231404958678	0.004132231404958678	0.0041109969167523125	0.0031120331950207475	0.003871873230422604	0.0005066589171092378
neg_3422	0.004132231404958678	0.004132231404958678	0.0041109969167523125	0.0031120331950207475	0.003871873230422604	0.0005066589171092378
neg_3653	0.002066115702479339	0.006198347107438017	0.0041109969167523125	0.0031120331950207475	0.003871873230422604	0.001761417797014884
neg_392	0.002066115702479339	0.004132231404958678	0.0051387461459403904	0.004149377593360997	0.003871617711684851	0.0012923521221832445
neg_64	0.006198347107438017	0.0030991735537190084	0.0041109969167523125	0.0020746887966804984	0.0038708015936474586	0.0017603591417132561
neg_112	0.004132231404958678	0.006198347107438017	0.0041109969167523125	0.0010373443983402492	0.0038697299568723137	0.0021269683074168345
Zhihengliuella	0.002066115702479339	0.002066115702479339	0.008221993833504625	0.0031120331950207475	0.0038665646083710127	0.002945183294484594
neg_1139	0.002066115702479339	0.002066115702479339	0.0020554984583761563	0.008298755186721993	0.0036216212625142068	0.003118093299716743
neg_3101	0.002066115702479339	0.004132231404958678	0.0020554984583761563	0.006224066390041495	0.003619477988963917	0.001992131452306989
Flexilinea	0.004132231404958678	0.004132231404958678	0.0020554984583761563	0.004149377593360997	0.003617334715413627	0.001041255543335423
Lacinutrix	0.004132231404958678	0.004132231404958678	0.0020554984583761563	0.004149377593360997	0.003617334715413627	0.001041255543335423
Cvm10virus	0.005165289256198347	0.004132231404958678	0.0020554984583761563	0.0031120331950207475	0.003616263078638482	0.0013361561021486407
neg_675	0.004132231404958678	0.0030991735537190084	0.003083247687564234	0.004149377593360997	0.003616007559900729	0.0006060586116643794
neg_3587	0.004132231404958678	0.0030991735537190084	0.003083247687564234	0.004149377593360997	0.003616007559900729	0.0006060586116643794
Lawsonella	0.004132231404958678	0.004132231404958678	0.003083247687564234	0.0031120331950207475	0.0036149359231255843	0.0005974369603619263
neg_769	0.005165289256198347	0.0030991735537190084	0.003083247687564234	0.0031120331950207475	0.0036149359231255843	0.0010336359470070268
neg_2851	0.004132231404958678	0.002066115702479339	0.0041109969167523125	0.004149377593360997	0.0036146804043878313	0.0010324958173491179
Ornithobacterium	0.0030991735537190084	0.0030991735537190084	0.0041109969167523125	0.004149377593360997	0.0036146804043878313	0.0005954622267657351
neg_2564	0.0030991735537190084	0.004132231404958678	0.0041109969167523125	0.0031120331950207475	0.0036136087676126864	0.0005866816442748203
neg_3496	0.0030991735537190084	0.004132231404958678	0.0041109969167523125	0.0031120331950207475	0.0036136087676126864	0.0005866816442748203
Halothiobacillus	0.0030991735537190084	0.005165289256198347	0.0041109969167523125	0.0020746887966804984	0.003612537130837541	0.0013276572075361706
neg_84	0.004132231404958678	0.004132231404958678	0.0041109969167523125	0.0020746887966804984	0.003612537130837541	0.0010252810889624987
neg_3487	0.002066115702479339	0.004132231404958678	0.0051387461459403904	0.0031120331950207475	0.003612281612099789	0.0013217815325070083
neg_3940	0.004132231404958678	0.0030991735537190084	0.0051387461459403904	0.0020746887966804984	0.0036112099753246437	0.0013200894808244388
neg_3705	0.0030991735537190084	0.002066115702479339	0.006166495375128468	0.0031120331950207475	0.0036109544565868907	0.0017727716792559534
Thermopetrobacter	0.0030991735537190084	0.0030991735537190084	0.006166495375128468	0.0020746887966804984	0.0036098828198117454	0.001771509371092626
Pararhodospirillum	0.0030991735537190084	0.0030991735537190084	0.006166495375128468	0.0020746887966804984	0.0036098828198117454	0.001771509371092626
neg_2972	0.0010330578512396695	0.002066115702479339	0.008221993833504625	0.0031120331950207475	0.0036083001455610953	0.0031907499673960588
Emticicia	0.002066115702479339	0.0030991735537190084	0.0010277492291880781	0.007261410788381745	0.0033636123184420425	0.002732673575623103
neg_3362	0.002066115702479339	0.002066115702479339	0.0020554984583761563	0.007261410788381745	0.0033622851629291446	0.0025994219020558573
neg_3609	0.0030991735537190084	0.0030991735537190084	0.0020554984583761563	0.0051867219917012455	0.0033601418893788545	0.001313354267602958
neg_3739	0.004132231404958678	0.004132231404958678	0.0020554984583761563	0.0031120331950207475	0.003357998615828565	0.0009926191736890008
neg_3785	0.004132231404958678	0.004132231404958678	0.0020554984583761563	0.0031120331950207475	0.003357998615828565	0.0009926191736890008
neg_162	0.004132231404958678	0.004132231404958678	0.0020554984583761563	0.0031120331950207475	0.003357998615828565	0.0009926191736890008
neg_1863	0.0030991735537190084	0.0030991735537190084	0.003083247687564234	0.004149377593360997	0.003357743097090812	0.0005278097267813844
neg_2251	0.004132231404958678	0.0010330578512396695	0.0041109969167523125	0.004149377593360997	0.003356415941577914	0.0015489849448864445
neg_3458	0.005165289256198347	0.0030991735537190084	0.003083247687564234	0.0020746887966804984	0.003355599823540522	0.0012981575429854965
neg_1307	0.0030991735537190084	0.005165289256198347	0.0041109969167523125	0.0010373443983402492	0.003353201031252479	0.0017593218620265342
neg_708	0.0030991735537190084	0.0030991735537190084	0.006166495375128468	0.0010373443983402492	0.0033505467202266832	0.0021139890213136676
neg_2267	0.004132231404958678	0.0030991735537190084	0.0010277492291880781	0.004149377593360997	0.00310213294530669	0.001467526348332733
neg_483	0.004132231404958678	0.0010330578512396695	0.0020554984583761563	0.0051867219917012455	0.003101877426568937	0.0018958840999989996
Candidatus_Halobonum	0.0030991735537190084	0.0030991735537190084	0.0020554984583761563	0.004149377593360997	0.0031008057897937923	0.0008548246550688719
Stappia	0.006198347107438017	0.0010330578512396695	0.0020554984583761563	0.0031120331950207475	0.0030997341530186475	0.0022333183554246526
neg_2833	0.004132231404958678	0.0010330578512396695	0.003083247687564234	0.004149377593360997	0.0030994786342808944	0.0014650625021748105
neg_3852	0.0030991735537190084	0.0030991735537190084	0.003083247687564234	0.0031120331950207475	0.0030984069975057496	1.1784921912863e-05
Limestonevirus	0.0	0.006198347107438017	0.003083247687564234	0.0031120331950207475	0.0030984069975057496	0.0025304920526316673
neg_2264	0.0030991735537190084	0.0030991735537190084	0.003083247687564234	0.0031120331950207475	0.0030984069975057496	1.1784921912863e-05
neg_3820	0.002066115702479339	0.004132231404958678	0.003083247687564234	0.0031120331950207475	0.0030984069975057496	0.000843570526822214
neg_3689	0.0030991735537190084	0.0030991735537190084	0.003083247687564234	0.0031120331950207475	0.0030984069975057496	1.1784921912863e-05
neg_861	0.0	0.004132231404958678	0.0041109969167523125	0.004149377593360997	0.0030981514787679965	0.0020654939767838255
Melissococcus	0.0030991735537190084	0.0010330578512396695	0.0041109969167523125	0.004149377593360997	0.0030981514787679965	0.0014600850386585077
neg_826	0.008264462809917356	0.0010330578512396695	0.0020554984583761563	0.0010373443983402492	0.0030975908794683574	0.0034779991540830595
Thiodictyon	0.004132231404958678	0.0030991735537190084	0.003083247687564234	0.0020746887966804984	0.0030973353607306048	0.0008400431851619509
Succinimonas	0.0030991735537190084	0.004132231404958678	0.003083247687564234	0.0020746887966804984	0.0030973353607306048	0.0008400431851619509
neg_2973	0.002066115702479339	0.005165289256198347	0.003083247687564234	0.0020746887966804984	0.0030973353607306048	0.0014589781532340594
neg_1798	0.004132231404958678	0.004132231404958678	0.003083247687564234	0.0010373443983402492	0.0030962637239554595	0.0014589695311830542
neg_794	0.002066115702479339	0.004132231404958678	0.0041109969167523125	0.0020746887966804984	0.0030960082052177065	0.0011843046491050613
Thermoanaerobacter	0.002066115702479339	0.004132231404958678	0.0041109969167523125	0.0020746887966804984	0.0030960082052177065	0.0011843046491050613
neg_781	0.0030991735537190084	0.0030991735537190084	0.0041109969167523125	0.0020746887966804984	0.0030960082052177065	0.0008313273438022156
Fimbriimonas	0.0030991735537190084	0.004132231404958678	0.0041109969167523125	0.0010373443983402492	0.0030949365684425616	0.0014539672967185226
neg_3377	0.0010330578512396695	0.002066115702479339	0.006166495375128468	0.0031120331950207475	0.003094425530967056	0.00221694842607494
Porticoccus	0.002066115702479339	0.002066115702479339	0.006166495375128468	0.0020746887966804984	0.0030933538941919107	0.0020487649733247184
neg_207	0.002066115702479339	0.002066115702479339	0.006166495375128468	0.0020746887966804984	0.0030933538941919107	0.0020487649733247184
neg_2570	0.0030991735537190084	0.004132231404958678	0.0051387461459403904	0.0	0.0030925377761545194	0.002223493157537207
neg_1901	0.002066115702479339	0.002066115702479339	0.0010277492291880781	0.006224066390041495	0.0028460117560470625	0.0023046190889582235
neg_1718	0.002066115702479339	0.002066115702479339	0.0020554984583761563	0.0051867219917012455	0.0028436129637590198	0.0015620807035291152
Limnobacter	0.0030991735537190084	0.0030991735537190084	0.0020554984583761563	0.0031120331950207475	0.00284146969020873	0.0005240158871449174
Candidatus_Moduliflexus	0.005165289256198347	0.004132231404958678	0.0010277492291880781	0.0010373443983402492	0.002840653572171338	0.0021299961263525256
neg_1065	0.004132231404958678	0.0030991735537190084	0.0020554984583761563	0.0020746887966804984	0.002840398053433585	0.0009896423946488962
neg_2627	0.0030991735537190084	0.002066115702479339	0.003083247687564234	0.0031120331950207475	0.0028401425346958322	0.0005161521908411549
Haliscomenobacter	0.002066115702479339	0.0030991735537190084	0.003083247687564234	0.0031120331950207475	0.0028401425346958322	0.0005161521908411549
Catenovulum	0.004132231404958678	0.004132231404958678	0.0020554984583761563	0.0010373443983402492	0.00283932641665844	0.0015497023456210713
neg_94	0.0010330578512396695	0.005165289256198347	0.003083247687564234	0.0020746887966804984	0.0028390708979206874	0.0017622785701535252
neg_757	0.0010330578512396695	0.0030991735537190084	0.0041109969167523125	0.0031120331950207475	0.0028388153791829344	0.0012937852047635394
neg_3529	0.0	0.0	0.006166495375128468	0.0051867219917012455	0.0028383043417074287	0.0033017098644014323
Candidatus_Arcanobacter	0.0030991735537190084	0.002066115702479339	0.0041109969167523125	0.0020746887966804984	0.002837743742407789	0.0009776130581546267
neg_2932	0.0010330578512396695	0.002066115702479339	0.0051387461459403904	0.0031120331950207475	0.002837488223670037	0.0017532966569202633
neg_430	0.0030991735537190084	0.0030991735537190084	0.0041109969167523125	0.0010373443983402492	0.0028366721056326443	0.0012909038103799165
neg_286	0.0030991735537190084	0.0030991735537190084	0.0041109969167523125	0.0010373443983402492	0.0028366721056326443	0.0012909038103799165
neg_1112	0.002066115702479339	0.002066115702479339	0.0020554984583761563	0.004149377593360997	0.0025842768641739576	0.001043412490168246
neg_2965	0.002066115702479339	0.002066115702479339	0.0020554984583761563	0.004149377593360997	0.0025842768641739576	0.001043412490168246
Dethiosulfovibrio	0.005165289256198347	0.004132231404958678	0.0	0.0010373443983402492	0.0025837162648743184	0.0024582699835174284
Candidatus_Sulfotelmatomonas	0.0030991735537190084	0.004132231404958678	0.0010277492291880781	0.0020746887966804984	0.002583460746136566	0.0013346332172863493
Metaprevotella	0.005165289256198347	0.002066115702479339	0.0010277492291880781	0.0020746887966804984	0.002583460746136566	0.00179002528567653
Sulfobacillus	0.002066115702479339	0.004132231404958678	0.0020554984583761563	0.0020746887966804984	0.0025821335906236675	0.0010334283520251882
neg_1737	0.0030991735537190084	0.0010330578512396695	0.003083247687564234	0.0031120331950207475	0.002581878071885915	0.0010326139384299038
Pakpunavirus	0.002066115702479339	0.002066115702479339	0.003083247687564234	0.0031120331950207475	0.002581878071885915	0.0005956670181410936
neg_681	0.0030991735537190084	0.002066115702479339	0.003083247687564234	0.0020746887966804984	0.00258080643511077	0.0005894102408363034
neg_1116	0.002066115702479339	0.0010330578512396695	0.0051387461459403904	0.0020746887966804984	0.0025781521240849743	0.0017757265814151446
neg_2373	0.0010330578512396695	0.002066115702479339	0.0051387461459403904	0.0020746887966804984	0.0025781521240849743	0.0017757265814151446
neg_1330	0.002066115702479339	0.002066115702479339	0.0051387461459403904	0.0010373443983402492	0.0025770804873098295	0.0017753016826215036
Trichormus	0.0	0.004132231404958678	0.0051387461459403904	0.0010373443983402492	0.0025770804873098295	0.0024489968276159937
neg_420	0.0010330578512396695	0.0030991735537190084	0.0051387461459403904	0.0010373443983402492	0.0025770804873098295	0.0019654944450843296
neg_2788	0.002066115702479339	0.002066115702479339	0.0	0.0051867219917012455	0.002329738349164981	0.0021392389697414077
neg_1884	0.0010330578512396695	0.0010330578512396695	0.0010277492291880781	0.006224066390041495	0.0023294828304272278	0.002596390245753753
neg_771	0.002066115702479339	0.002066115702479339	0.0010277492291880781	0.004149377593360997	0.002327339556876938	0.0013096097930846678
Alkalibacterium	0.004132231404958678	0.002066115702479339	0.0010277492291880781	0.0020746887966804984	0.0023251962833266485	0.0013011048557978826
neg_193	0.002066115702479339	0.005165289256198347	0.0010277492291880781	0.0010373443983402492	0.002324124646551503	0.0019557758549368373
neg_3623	0.002066115702479339	0.005165289256198347	0.0010277492291880781	0.0010373443983402492	0.002324124646551503	0.0019557758549368373
neg_2738	0.0030991735537190084	0.002066115702479339	0.0020554984583761563	0.0020746887966804984	0.00232386912781375	0.0005169292133158283
neg_2400	0.0010330578512396695	0.002066115702479339	0.003083247687564234	0.0031120331950207475	0.0023236136090759975	0.000988346887937652
neg_3586	0.002066115702479339	0.002066115702479339	0.003083247687564234	0.0020746887966804984	0.0023225419723008527	0.0005071532462706641
Methanosphaerula	0.006198347107438017	0.0010330578512396695	0.0020554984583761563	0.0	0.0023217258542634605	0.0027172379070947716
neg_1804	0.002066115702479339	0.0030991735537190084	0.003083247687564234	0.0010373443983402492	0.0023214703355257074	0.0009830755211474047
neg_416	0.0	0.0	0.0010277492291880781	0.007261410788381745	0.0020722900043924557	0.003493174853267628
neg_1874	0.0010330578512396695	0.0010330578512396695	0.0010277492291880781	0.0051867219917012455	0.0020701467308421656	0.0020777183476467518
neg_3158	0.0010330578512396695	0.0010330578512396695	0.0020554984583761563	0.004149377593360997	0.002067747938554123	0.0014690699124627117
Brevinema	0.002066115702479339	0.0030991735537190084	0.0010277492291880781	0.0020746887966804984	0.002066931820516731	0.0008456721765579599
Defluviimonas	0.002066115702479339	0.002066115702479339	0.0020554984583761563	0.0020746887966804984	0.0020656046650038328	7.856614608575272e-06
neg_3666	0.002066115702479339	0.002066115702479339	0.0020554984583761563	0.0020746887966804984	0.0020656046650038328	7.856614608575272e-06
neg_3759	0.002066115702479339	0.002066115702479339	0.0020554984583761563	0.0020746887966804984	0.0020656046650038328	7.856614608575272e-06
neg_2282	0.0	0.0	0.0041109969167523125	0.004149377593360997	0.0020650936275283275	0.002384616202522668
neg_1109	0.0010330578512396695	0.006198347107438017	0.0010277492291880781	0.0	0.002064788546966441	0.0027981885147153507
Desulfocucumis	0.0030991735537190084	0.004132231404958678	0.0010277492291880781	0.0	0.002064788546966441	0.0018870677963054759
neg_1717	0.002066115702479339	0.002066115702479339	0.003083247687564234	0.0010373443983402492	0.00206320587271579	0.0008352432785054847
Lihuaxuella	0.002066115702479339	0.002066115702479339	0.003083247687564234	0.0010373443983402492	0.00206320587271579	0.0008352432785054847
neg_3092	0.002066115702479339	0.002066115702479339	0.0041109969167523125	0.0	0.0020608070804277474	0.0016783186577292025
Eah2virus	0.0	0.0	0.006166495375128468	0.0020746887966804984	0.0020602960429522417	0.002906929633142944
neg_412	0.0010330578512396695	0.0030991735537190084	0.0010277492291880781	0.0020746887966804984	0.0018086673577068135	0.0009912243065877179
neg_3762	0.0010330578512396695	0.0010330578512396695	0.0020554984583761563	0.0031120331950207475	0.0018084118389690607	0.000993785364153951
neg_2310	0.002066115702479339	0.0	0.0020554984583761563	0.0031120331950207475	0.0018084118389690607	0.0013034882812458333
neg_3656	0.005165289256198347	0.002066115702479339	0.0	0.0	0.0018078512396694215	0.002441020468105686
Altibacter	0.0	0.0030991735537190084	0.0020554984583761563	0.0020746887966804984	0.0018073402021939156	0.0012997909839232177
neg_1450	0.0010330578512396695	0.005165289256198347	0.0010277492291880781	0.0	0.0018065240841565237	0.0022912567901883325
Candidatus_Electrothrix	0.002066115702479339	0.0	0.003083247687564234	0.0020746887966804984	0.0018060130466810178	0.0012952286159651834
neg_3566	0.0010330578512396695	0.002066115702479339	0.003083247687564234	0.0010373443983402492	0.0018049414099058727	0.0009810348874030432
neg_1727	0.002066115702479339	0.0010330578512396695	0.003083247687564234	0.0010373443983402492	0.0018049414099058727	0.0009810348874030432
neg_1649	0.0010330578512396695	0.0010330578512396695	0.0041109969167523125	0.0010373443983402492	0.0018036142543929753	0.0015382564354632865
neg_1004	0.0010330578512396695	0.0010330578512396695	0.0051387461459403904	0.0	0.0018012154621049323	0.002277690382582725
neg_2298	0.0010330578512396695	0.002066115702479339	0.0	0.0031120331950207475	0.001552801687184939	0.0013386586455669078
neg_26	0.0030991735537190084	0.0	0.0	0.0031120331950207475	0.001552801687184939	0.0017930286300079702
neg_3294	0.002066115702479339	0.0010330578512396695	0.0010277492291880781	0.0020746887966804984	0.0015504028948968962	0.0006004576463523949
Synergistes	0.002066115702479339	0.0010330578512396695	0.0010277492291880781	0.0020746887966804984	0.0015504028948968962	0.0006004576463523949
Leminorella	0.0030991735537190084	0.0	0.0010277492291880781	0.0020746887966804984	0.0015504028948968962	0.0013354752276775067
neg_1791	0.002066115702479339	0.0010330578512396695	0.0010277492291880781	0.0020746887966804984	0.0015504028948968962	0.0006004576463523949
Amantichitinum	0.002066115702479339	0.004132231404958678	0.0	0.0	0.0015495867768595042	0.0019781551813147485
neg_580	0.004132231404958678	0.002066115702479339	0.0	0.0	0.0015495867768595042	0.0019781551813147485
Methanosalsum	0.0030991735537190084	0.0010330578512396695	0.0010277492291880781	0.0010373443983402492	0.0015493312581217511	0.0010332356506578897
neg_2109	0.0030991735537190084	0.0010330578512396695	0.0010277492291880781	0.0010373443983402492	0.0015493312581217511	0.0010332356506578897
neg_1796	0.002066115702479339	0.0010330578512396695	0.0020554984583761563	0.0010373443983402492	0.0015480041026088532	0.0005921523245525307
Lmd1virus	0.0	0.0	0.0041109969167523125	0.0020746887966804984	0.0015464214283582027	0.0019696829115602083
neg_846	0.0010330578512396695	0.0010330578512396695	0.0041109969167523125	0.0	0.0015442781548079129	0.0017790945843223305
Mongoliibacter	0.0010330578512396695	0.002066115702479339	0.0	0.0020746887966804984	0.0012934655875998767	0.0009913229070104273
neg_2462	0.002066115702479339	0.0010330578512396695	0.0	0.0020746887966804984	0.0012934655875998767	0.0009913229070104273
neg_3252	0.0	0.0010330578512396695	0.0010277492291880781	0.0031120331950207475	0.0012932100688621238	0.001306223370406728
Beggiatoa	0.0010330578512396695	0.0010330578512396695	0.0010277492291880781	0.0020746887966804984	0.0012921384320869788	0.000521706245084123
neg_2684	0.002066115702479339	0.0010330578512396695	0.0010277492291880781	0.0010373443983402492	0.0012910667953118338	0.0005167141760125941
Candidatus_Kryptonium	0.002066115702479339	0.0010330578512396695	0.0010277492291880781	0.0010373443983402492	0.0012910667953118338	0.0005167141760125941
Gottschalkia	0.002066115702479339	0.0010330578512396695	0.0010277492291880781	0.0010373443983402492	0.0012910667953118338	0.0005167141760125941
Sideroxydans	0.002066115702479339	0.0010330578512396695	0.0010277492291880781	0.0010373443983402492	0.0012910667953118338	0.0005167141760125941
neg_2257	0.0010330578512396695	0.002066115702479339	0.0010277492291880781	0.0010373443983402492	0.0012910667953118338	0.0005167141760125941
neg_176	0.002066115702479339	0.0010330578512396695	0.0010277492291880781	0.0010373443983402492	0.0012910667953118338	0.0005167141760125941
neg_2456	0.002066115702479339	0.002066115702479339	0.0010277492291880781	0.0	0.001289995158536689	0.0009895430989380373
neg_2754	0.0010330578512396695	0.0010330578512396695	0.0020554984583761563	0.0010373443983402492	0.0012897396397989359	0.0005105098782249426
neg_1354	0.0010330578512396695	0.0010330578512396695	0.0020554984583761563	0.0010373443983402492	0.0012897396397989359	0.0005105098782249426
neg_1188	0.0010330578512396695	0.0010330578512396695	0.0020554984583761563	0.0010373443983402492	0.0012897396397989359	0.0005105098782249426
neg_1996	0.0	0.002066115702479339	0.0020554984583761563	0.0010373443983402492	0.0012897396397989359	0.0009859476076870721
neg_3198	0.0010330578512396695	0.0	0.0041109969167523125	0.0	0.0012860136919979955	0.001945265989484016
Suttonella	0.0	0.0010330578512396695	0.0	0.0031120331950207475	0.0010362727615651044	0.0014670280826069072
Rubrivivax	0.002066115702479339	0.0	0.0	0.0020746887966804984	0.0010352011247899593	0.0011953524200053135
neg_2892	0.002066115702479339	0.0010330578512396695	0.0	0.0010373443983402492	0.0010341294880148143	0.0008434909264243017
neg_637	0.002066115702479339	0.002066115702479339	0.0	0.0	0.0010330578512396695	0.001192872457003359
Turicibacter	0.0030991735537190084	0.0	0.0010277492291880781	0.0	0.0010317306957267716	0.0014609668351413276
neg_726	0.0010330578512396695	0.002066115702479339	0.0010277492291880781	0.0	0.0010317306957267716	0.0008434923797555238
Acetivibrio	0.002066115702479339	0.0010330578512396695	0.0010277492291880781	0.0	0.0010317306957267716	0.0008434923797555238
Mudcatvirus	0.0010330578512396695	0.0010330578512396695	0.0020554984583761563	0.0	0.0010304035402138737	0.0008391593288646013
Dactylococcopsis	0.0010330578512396695	0.0010330578512396695	0.0020554984583761563	0.0	0.0010304035402138737	0.0008391593288646013
Candidatus_Tokpelaia	0.0010330578512396695	0.0	0.0	0.0020746887966804984	0.000776936661980042	0.0009928107943552216
neg_2801	0.0010330578512396695	0.002066115702479339	0.0	0.0	0.0007747933884297521	0.0009890775906573742
Rodentibacter	0.0010330578512396695	0.0	0.0010277492291880781	0.0010373443983402492	0.0007745378696919991	0.0005163734941959564
neg_3088	0.0	0.0010330578512396695	0.0010277492291880781	0.0010373443983402492	0.0007745378696919991	0.0005163734941959564
neg_2383	0.0	0.0010330578512396695	0.0010277492291880781	0.0010373443983402492	0.0007745378696919991	0.0005163734941959564
Dolosicoccus	0.0010330578512396695	0.0010330578512396695	0.0010277492291880781	0.0	0.0007734662329168542	0.0005156502277908211
neg_2157	0.0	0.0010330578512396695	0.0020554984583761563	0.0	0.0007721390774039564	0.00098446049810336
Natribacillus	0.0	0.0010330578512396695	0.0	0.0010373443983402492	0.0005176005623949797	0.0005976762100026568
neg_2135	0.002066115702479339	0.0	0.0	0.0	0.0005165289256198347	0.0010330578512396695
Kordiimonas	0.0	0.0010330578512396695	0.0010277492291880781	0.0	0.0005152017701069368	0.0005949077089261627
neg_2461	0.0	0.0	0.0020554984583761563	0.0	0.0005138746145940391	0.0010277492291880781
neg_783	0.0010330578512396695	0.0	0.0	0.0	0.00025826446280991736	0.0005165289256198347
neg_1554	0.0010330578512396695	0.0	0.0	0.0	0.00025826446280991736	0.0005165289256198347
neg_2842	0.0	0.0	0.0	0.0	0.0	0.0
