# Supplementary material for: Multi-omics analyses reveal that the gut microbiome and its metabolites promote milk fat synthesis in Zhongdian yak cows
Source: PeerJ journal article supplement (doi:10.7717/peerj.14444), 2022-12-02
Supplement: neg_biomarker_Web_Report.zip [file treat1_H_L.vs.H_L_function_cor_filter.xls]

GenesName	metaName	CC	CCP
K01814	neg_1004	-0.812897026538849	0.00424919679863534
K12072	neg_1004	0.854838728904724	0.00162424574299602
K09815	neg_1004	-0.800390899181366	0.0054162086926719
K02665	neg_1004	0.90172153711319	0.000361951655085679
K21217	neg_1004	0.873542726039886	0.000957809429852796
K06871	neg_1004	-0.881680607795715	0.000741594922435862
K16014	neg_1004	-0.806451618671417	0.00482540374486629
K03414	neg_1004	0.817185163497925	0.00389426659690773
K10942	neg_1004	0.817185163497925	0.00389426659690773
