# Supplementary material for: Multi-omics analyses reveal that the gut microbiome and its metabolites promote milk fat synthesis in Zhongdian yak cows
Source: PeerJ journal article supplement (doi:10.7717/peerj.14444), 2022-12-02
Supplement: neg_biomarker_Web_Report.zip [file treat1_H_L.vs.H_L_function_cor_filter.xls]

GenesName	metaName	CC	CCP
K01814	neg_1004	-0.812897026538849	0.00424919679863534
K12072	neg_1004	0.854838728904724	0.00162424574299602
K09815	neg_1004	-0.800390899181366	0.0054162086926719
K02665	neg_1004	0.90172153711319	0.000361951655085679
K21217	neg_1004	0.873542726039886	0.000957809429852796
K06871	neg_1004	-0.881680607795715	0.000741594922435862
K16014	neg_1004	-0.806451618671417	0.00482540374486629
K03414	neg_1004	0.817185163497925	0.00389426659690773
K10942	neg_1004	0.817185163497925	0.00389426659690773
K18198	neg_1065	-0.842424213886261	0.00222003275351312
K07672	neg_1065	0.806643962860107	0.00480744414521128
K03340	neg_1065	0.818181812763214	0.00381492051076338
K11754	neg_1065	0.818181812763214	0.00381492051076338
K02493	neg_1065	0.939393937587738	5.48405364009241e-05
K02784	neg_1065	0.903030276298523	0.000343612565232743
K03769	neg_1065	0.854545474052429	0.00163680247839526
K17331	neg_1065	0.887625336647034	0.000607926148504134
K09761	neg_1065	0.818181812763214	0.00381492051076338
K19334	neg_1065	0.854545474052429	0.00163680247839526
K21217	neg_1065	-0.826174378395081	0.00321991677364641
K03573	neg_1065	0.854545474052429	0.00163680247839526
K03501	neg_1065	0.842424213886261	0.00222003275351312
K00344	neg_1065	0.830303013324738	0.00294022813612127
K00969	neg_1065	0.830303013324738	0.00294022813612127
K06145	neg_1065	0.818181812763214	0.00381492051076338
K05970	neg_1065	0.866666674613953	0.0011735379121256
K01409	neg_1065	0.830303013324738	0.00294022813612127
K00919	neg_1065	0.842424213886261	0.00222003275351312
K20525	neg_1065	0.927272737026215	0.000112034447641074
K02458	neg_1109	0.816012322902679	0.0039891464803441
K05802	neg_1109	0.821065366268158	0.00359188206024896
K09512	neg_1109	-0.846925735473633	0.0019883679465349
K06311	neg_1109	0.863225877285004	0.00129381457010247
K04565	neg_1112	0.830303013324738	0.00294022813612127
K07139	neg_1112	0.830303013324738	0.00294022813612127
K05787	neg_1112	0.854545474052429	0.00163680247839526
K20452	neg_1112	-0.901908397674561	0.000359290276283897
K14575	neg_1112	0.802435338497162	0.00521145970824932
K01814	neg_1116	0.830303013324738	0.00294022813612127
K12072	neg_1116	-0.850415349006653	0.00182121334938934
K02665	neg_1116	-0.887625336647034	0.000607926148504134
K21217	neg_1116	-0.833002269268036	0.00276710271221536
K06871	neg_1116	0.878787875175476	0.000813862205061078
K16014	neg_1116	0.81915009021759	0.00373894966455346
K11933	neg_112	-0.835593700408936	0.00260791837015528
K17329	neg_112	-0.860478162765503	0.00139610202996154
K10237	neg_112	-0.813785552978516	0.00417382592013071
K02461	neg_112	-0.935483872890472	7.00850078045878e-05
K03651	neg_112	0.800390899181366	0.0054162086926719
K02665	neg_112	-0.845363914966583	0.00206666064770777
K21217	neg_112	-0.845363914966583	0.00206666064770777
K19157	neg_112	0.912945866584778	0.000225958764512368
K03414	neg_112	-0.845363914966583	0.00206666064770777
K05802	neg_112	-0.900500416755676	0.000379701199800131
K05851	neg_112	-0.800000011920929	0.00545599878335024
K10942	neg_112	-0.845363914966583	0.00206666064770777
K06311	neg_112	-0.865548312664032	0.00121169851367053
K02919	neg_112	-0.81915009021759	0.00373894966455346
K12543	neg_1139	0.866666674613953	0.0011735379121256
K06139	neg_1139	-0.830303013324738	0.00294022813612127
K00013	neg_1188	-0.830303013324738	0.00294022813612127
K02665	neg_1188	0.846658051013947	0.00200163182665913
K21217	neg_1188	0.819346487522125	0.00372367376291516
K16014	neg_1188	-0.931705057621002	8.75967112814457e-05
K06145	neg_1188	-0.866666674613953	0.0011735379121256
K03414	neg_1188	0.805690705776215	0.00489692183645341
K10942	neg_1188	0.805690705776215	0.00489692183645341
K17329	neg_1307	-0.859855890274048	0.00142005806532719
K02461	neg_1307	-0.856668412685394	0.00154747182074688
K03651	neg_1307	0.842424213886261	0.00222003275351312
K02665	neg_1307	-0.833002269268036	0.00276710271221536
K19157	neg_1307	0.878787875175476	0.000813862205061078
K04748	neg_1307	-0.818181812763214	0.00381492051076338
K06145	neg_1307	0.806060612201691	0.0048620605246823
K05802	neg_1307	-0.898646354675293	0.000407860267078952
K06311	neg_1307	-0.826751530170441	0.00317971472634282
K02919	neg_1307	-0.806060612201691	0.0048620605246823
K02461	neg_1330	-0.848254203796387	0.00192348015922827
K02665	neg_1330	-0.8156378865242	0.00401978302331507
K21217	neg_1330	-0.8156378865242	0.00401978302331507
K19157	neg_1330	0.889637529850006	0.000566964581027118
K03414	neg_1330	-0.843286633491516	0.00217421422639408
K05802	neg_1330	-0.922830998897552	0.000141238827938484
K10942	neg_1330	-0.843286633491516	0.00217421422639408
K06311	neg_1330	-0.916962146759033	0.000187990654342052
K02919	neg_1330	-0.816012322902679	0.0039891464803441
K16014	neg_1354	-0.919198930263519	0.00016900592052238
K03414	neg_1354	0.819346487522125	0.00372367376291516
K05802	neg_1354	0.846925735473633	0.0019883679465349
K10942	neg_1354	0.819346487522125	0.00372367376291516
K18198	neg_136	0.854545474052429	0.00163680247839526
K17329	neg_136	0.924506723880768	0.000129632545059266
K00100	neg_136	0.818181812763214	0.00381492051076338
K02461	neg_136	0.856668412685394	0.00154747182074688
K07126	neg_136	-0.818181812763214	0.00381492051076338
K03651	neg_136	-0.878787875175476	0.000813862205061078
K09789	neg_136	-0.830303013324738	0.00294022813612127
K02665	neg_136	0.846658051013947	0.00200163182665913
K04748	neg_136	0.890909075737	0.000542144516154419
K06145	neg_136	-0.878787875175476	0.000813862205061078
K05802	neg_136	0.833995580673218	0.00270528265085312
K09512	neg_136	-0.846925735473633	0.0019883679465349
K06311	neg_136	0.83890962600708	0.00241398974898654
K17329	neg_1361	-0.911576509475708	0.000240107073119944
K10237	neg_1361	-0.833995580673218	0.00270528265085312
K02461	neg_1361	-0.90043979883194	0.000380598613888061
K01729	neg_1361	0.866666674613953	0.0011735379121256
K03651	neg_1361	0.818181812763214	0.00381492051076338
K06285	neg_1361	-0.854545474052429	0.00163680247839526
K12072	neg_1361	-0.812897026538849	0.00424919679863534
K04565	neg_1361	0.818181812763214	0.00381492051076338
K02665	neg_1361	-0.873969614505768	0.000945449010965937
K21217	neg_1361	-0.846658051013947	0.00200163182665913
K03643	neg_1361	0.830303013324738	0.00294022813612127
K19157	neg_1361	0.854545474052429	0.00163680247839526
K18692	neg_1361	-0.830303013324738	0.00294022813612127
K06145	neg_1361	0.830303013324738	0.00294022813612127
K17680	neg_1361	-0.806060612201691	0.0048620605246823
K05851	neg_1361	-0.806643962860107	0.00480744414521128
K18298	neg_1361	-0.866666674613953	0.0011735379121256
K00057	neg_1361	0.806060612201691	0.0048620605246823
K11754	neg_1363	0.830303013324738	0.00294022813612127
K00297	neg_1363	0.903030276298523	0.000343612565232743
K00848	neg_1363	0.854545474052429	0.00163680247839526
K01151	neg_1363	0.842424213886261	0.00222003275351312
K11933	neg_1382	-0.865095794200897	0.00122739260821847
K17329	neg_1382	-0.872786045074463	0.000980007503875058
K02461	neg_1382	-0.831656157970428	0.00285249465359505
K02745	neg_1382	-0.806060612201691	0.0048620605246823
K03651	neg_1382	0.866666674613953	0.0011735379121256
K06926	neg_1382	0.806060612201691	0.0048620605246823
K19157	neg_1382	0.806060612201691	0.0048620605246823
K04748	neg_1382	-0.866666674613953	0.0011735379121256
K18692	neg_1382	-0.806060612201691	0.0048620605246823
K06145	neg_1382	0.830303013324738	0.00294022813612127
K03414	neg_1382	-0.819346487522125	0.00372367376291516
K05802	neg_1382	-0.885716199874878	0.000648751005291714
K10942	neg_1382	-0.819346487522125	0.00372367376291516
K06311	neg_1382	-0.826751530170441	0.00317971472634282
K02919	neg_1382	-0.830303013324738	0.00294022813612127
K18198	neg_1401	0.866666674613953	0.0011735379121256
K08714	neg_1401	-0.818181812763214	0.00381492051076338
K07672	neg_1401	-0.850415349006653	0.00182121334938934
K03340	neg_1401	-0.842424213886261	0.00222003275351312
K03470	neg_1401	-0.818181812763214	0.00381492051076338
K10237	neg_1401	0.821065366268158	0.00359188206024896
K11754	neg_1401	-0.878787875175476	0.000813862205061078
K02461	neg_1401	0.831656157970428	0.00285249465359505
K07126	neg_1401	-0.866666674613953	0.0011735379121256
K03651	neg_1401	-0.866666674613953	0.0011735379121256
K12543	neg_1401	0.854545474052429	0.00163680247839526
K05830	neg_1401	0.963636338710785	7.32099466027591e-06
K07454	neg_1401	-0.806060612201691	0.0048620605246823
K06926	neg_1401	-0.830303013324738	0.00294022813612127
K01909	neg_1401	0.818181812763214	0.00381492051076338
K06145	neg_1401	-0.830303013324738	0.00294022813612127
K00057	neg_1401	-0.842424213886261	0.00222003275351312
K08714	neg_1413	-0.842424213886261	0.00222003275351312
K17329	neg_1413	0.898646354675293	0.000407860267078952
K01159	neg_1413	-0.903030276298523	0.000343612565232743
K03470	neg_1413	-0.866666674613953	0.0011735379121256
K04061	neg_1413	0.818181812763214	0.00381492051076338
K04096	neg_1413	-0.806060612201691	0.0048620605246823
K02461	neg_1413	0.850415349006653	0.00182121334938934
K07126	neg_1413	-0.878787875175476	0.000813862205061078
K06285	neg_1413	0.915151536464691	0.000204472206099204
K02852	neg_1413	-0.842424213886261	0.00222003275351312
K04565	neg_1413	-0.806060612201691	0.0048620605246823
K02665	neg_1413	0.839830160140991	0.00236205253090405
K07139	neg_1413	-0.806060612201691	0.0048620605246823
K05787	neg_1413	-0.842424213886261	0.00222003275351312
K00059	neg_1413	-0.878787875175476	0.000813862205061078
K03643	neg_1413	-0.915151536464691	0.000204472206099204
K06179	neg_1413	-0.842424213886261	0.00222003275351312
K06926	neg_1413	-0.903030276298523	0.000343612565232743
K00783	neg_1413	-0.818181812763214	0.00381492051076338
K00849	neg_1413	-0.806060612201691	0.0048620605246823
K11068	neg_1413	-0.866666674613953	0.0011735379121256
K05851	neg_1413	0.831656157970428	0.00285249465359505
K14575	neg_1413	-0.875383973121643	0.00090532610126548
K14051	neg_1413	-0.846658051013947	0.00200163182665913
K01409	neg_1413	-0.806060612201691	0.0048620605246823
K09951	neg_1413	-0.806060612201691	0.0048620605246823
K00057	neg_1413	-0.842424213886261	0.00222003275351312
K08714	neg_1432	-0.806060612201691	0.0048620605246823
K03524	neg_1432	-0.806060612201691	0.0048620605246823
K02461	neg_1432	0.800390899181366	0.0054162086926719
K06285	neg_1432	0.806060612201691	0.0048620605246823
K02852	neg_1432	-0.806060612201691	0.0048620605246823
K04565	neg_1432	-0.818181812763214	0.00381492051076338
K07139	neg_1432	-0.878787875175476	0.000813862205061078
K05787	neg_1432	-0.878787875175476	0.000813862205061078
K03643	neg_1432	-0.866666674613953	0.0011735379121256
K06179	neg_1432	-0.818181812763214	0.00381492051076338
K11068	neg_1432	-0.842424213886261	0.00222003275351312
K05851	neg_1432	0.881680607795715	0.000741594922435862
K14575	neg_1432	-0.936174511909485	6.71888372667517e-05
K14051	neg_1432	-0.887625336647034	0.000607926148504134
K09951	neg_1432	-0.866666674613953	0.0011735379121256
K00845	neg_1438	0.818181812763214	0.00381492051076338
K18198	neg_1438	-0.842424213886261	0.00222003275351312
K00640	neg_1438	0.818181812763214	0.00381492051076338
K07672	neg_1438	0.894186735153198	0.000481835628326488
K05946	neg_1438	0.951515138149261	2.27985739738035e-05
K07099	neg_1438	0.842424213886261	0.00222003275351312
K03340	neg_1438	0.890909075737	0.000542144516154419
K03827	neg_1438	-0.818181812763214	0.00381492051076338
K03470	neg_1438	0.830303013324738	0.00294022813612127
K10237	neg_1438	-0.859855890274048	0.00142005806532719
K01261	neg_1438	0.818181812763214	0.00381492051076338
K07166	neg_1438	0.830303013324738	0.00294022813612127
K17331	neg_1438	0.860313832759857	0.00140239962667921
K09761	neg_1438	0.878787875175476	0.000813862205061078
K00949	neg_1438	0.830303013324738	0.00294022813612127
K14571	neg_1438	-0.844988703727722	0.00208579660703911
K15599	neg_1438	-0.890909075737	0.000542144516154419
K07396	neg_1438	-0.890909075737	0.000542144516154419
K03607	neg_1438	-0.833002269268036	0.00276710271221536
K05985	neg_1438	0.830303013324738	0.00294022813612127
K12231	neg_1438	-0.846658051013947	0.00200163182665913
K05989	neg_1438	0.866666674613953	0.0011735379121256
K09777	neg_1438	0.842424213886261	0.00222003275351312
K15792	neg_1438	0.818181812763214	0.00381492051076338
K00859	neg_1438	0.818181812763214	0.00381492051076338
K16199	neg_1438	0.830303013324738	0.00294022813612127
K01990	neg_1438	0.806060612201691	0.0048620605246823
K00849	neg_1438	0.806060612201691	0.0048620605246823
K00969	neg_1438	0.866666674613953	0.0011735379121256
K03218	neg_1438	0.818181812763214	0.00381492051076338
K10578	neg_1438	-0.846658051013947	0.00200163182665913
K01736	neg_1438	0.806060612201691	0.0048620605246823
K07053	neg_1438	0.842424213886261	0.00222003275351312
K01299	neg_1438	-0.854545474052429	0.00163680247839526
K15598	neg_1438	-0.806060612201691	0.0048620605246823
K05964	neg_1438	-0.842424213886261	0.00222003275351312
K07707	neg_1438	-0.830303013324738	0.00294022813612127
K02461	neg_1450	-0.900500416755676	0.000379701199800131
K19157	neg_1450	0.911576509475708	0.000240107073119944
K05802	neg_1450	-0.862068951129913	0.00133619469409485
K09512	neg_1450	0.834482729434967	0.00267533077056248
K06311	neg_1450	-0.830049574375153	0.00295687357761532
K02919	neg_1450	-0.859855890274048	0.00142005806532719
K18198	neg_1496	-0.890909075737	0.000542144516154419
K07672	neg_1496	0.812897026538849	0.00424919679863534
K11933	neg_1496	-0.816012322902679	0.0039891464803441
K17329	neg_1496	-0.821065366268158	0.00359188206024896
K10237	neg_1496	-0.872786045074463	0.000980007503875058
K02461	neg_1496	-0.869174480438232	0.00109115185763287
K02745	neg_1496	-0.806060612201691	0.0048620605246823
K03651	neg_1496	0.915151536464691	0.000204472206099204
K05830	neg_1496	-0.878787875175476	0.000813862205061078
K21217	neg_1496	-0.833002269268036	0.00276710271221536
K19157	neg_1496	0.866666674613953	0.0011735379121256
K04748	neg_1496	-0.854545474052429	0.00163680247839526
K16014	neg_1496	0.806643962860107	0.00480744414521128
K06145	neg_1496	0.890909075737	0.000542144516154419
K03414	neg_1496	-0.873969614505768	0.000945449010965937
K05802	neg_1496	-0.885716199874878	0.000648751005291714
K10942	neg_1496	-0.873969614505768	0.000945449010965937
K06311	neg_1496	-0.869304955005646	0.00108698415655106
K02919	neg_1496	-0.854545474052429	0.00163680247839526
K18198	neg_1532	0.915151536464691	0.000204472206099204
K07672	neg_1532	-0.919198930263519	0.00016900592052238
K01060	neg_1532	-0.818181812763214	0.00381492051076338
K05946	neg_1532	-0.806060612201691	0.0048620605246823
K17329	neg_1532	0.859855890274048	0.00142005806532719
K03340	neg_1532	-0.830303013324738	0.00294022813612127
K01159	neg_1532	-0.806060612201691	0.0048620605246823
K01261	neg_1532	-0.903030276298523	0.000343612565232743
K00100	neg_1532	0.830303013324738	0.00294022813612127
K04061	neg_1532	0.878787875175476	0.000813862205061078
K03406	neg_1532	0.951515138149261	2.27985739738035e-05
K07126	neg_1532	-0.818181812763214	0.00381492051076338
K02745	neg_1532	0.915151536464691	0.000204472206099204
K00852	neg_1532	-0.818181812763214	0.00381492051076338
K19411	neg_1532	-0.939393937587738	5.48405364009241e-05
K03412	neg_1532	0.806060612201691	0.0048620605246823
K03651	neg_1532	-0.927272737026215	0.000112034447641074
K17331	neg_1532	-0.81251859664917	0.00428159166664499
K19334	neg_1532	-0.878787875175476	0.000813862205061078
K01684	neg_1532	-0.818181812763214	0.00381492051076338
K03573	neg_1532	-0.854545474052429	0.00163680247839526
K02747	neg_1532	0.806060612201691	0.0048620605246823
K15520	neg_1532	-0.927272737026215	0.000112034447641074
K13014	neg_1532	-0.854545474052429	0.00163680247839526
K04748	neg_1532	0.927272737026215	0.000112034447641074
K02744	neg_1532	0.806060612201691	0.0048620605246823
K01909	neg_1532	0.830303013324738	0.00294022813612127
K04085	neg_1532	0.806060612201691	0.0048620605246823
K06145	neg_1532	-0.951515138149261	2.27985739738035e-05
K00230	neg_1532	-0.830303013324738	0.00294022813612127
K08169	neg_1532	0.842424213886261	0.00222003275351312
K01299	neg_1532	0.842424213886261	0.00222003275351312
K07341	neg_1532	-0.806060612201691	0.0048620605246823
K05964	neg_1532	0.806060612201691	0.0048620605246823
K03415	neg_1532	0.854545474052429	0.00163680247839526
K02784	neg_1554	0.830303013324738	0.00294022813612127
K05970	neg_1554	0.806060612201691	0.0048620605246823
K20525	neg_1554	0.866666674613953	0.0011735379121256
K18198	neg_1563	0.830303013324738	0.00294022813612127
K07126	neg_1563	-0.818181812763214	0.00381492051076338
K19411	neg_1563	-0.951515138149261	2.27985739738035e-05
K02493	neg_1563	-0.854545474052429	0.00163680247839526
K06285	neg_1563	0.806060612201691	0.0048620605246823
K03769	neg_1563	-0.878787875175476	0.000813862205061078
K17331	neg_1563	-0.833002269268036	0.00276710271221536
K19334	neg_1563	-0.939393937587738	5.48405364009241e-05
K04070	neg_1563	-0.818181812763214	0.00381492051076338
K03573	neg_1563	-0.915151536464691	0.000204472206099204
K15520	neg_1563	-0.806060612201691	0.0048620605246823
K00344	neg_1563	-0.842424213886261	0.00222003275351312
K13014	neg_1563	-0.890909075737	0.000542144516154419
K05970	neg_1563	-0.818181812763214	0.00381492051076338
K00230	neg_1563	-0.806060612201691	0.0048620605246823
K20525	neg_1563	-0.806060612201691	0.0048620605246823
K18198	neg_162	-0.927272737026215	0.000112034447641074
K00640	neg_162	0.830303013324738	0.00294022813612127
K07672	neg_162	0.887933671474457	0.000601513437458179
K05946	neg_162	0.854545474052429	0.00163680247839526
K03340	neg_162	0.915151536464691	0.000204472206099204
K01159	neg_162	0.830303013324738	0.00294022813612127
K03470	neg_162	0.878787875175476	0.000813862205061078
K07391	neg_162	0.830303013324738	0.00294022813612127
K10237	neg_162	-0.833995580673218	0.00270528265085312
K11754	neg_162	0.806060612201691	0.0048620605246823
K04061	neg_162	-0.842424213886261	0.00222003275351312
K07126	neg_162	0.915151536464691	0.000204472206099204
K03651	neg_162	0.806060612201691	0.0048620605246823
K09761	neg_162	0.866666674613953	0.0011735379121256
K12543	neg_162	-0.842424213886261	0.00222003275351312
K14571	neg_162	-0.83890962600708	0.00241398974898654
K05830	neg_162	-0.878787875175476	0.000813862205061078
K15599	neg_162	-0.818181812763214	0.00381492051076338
K02802	neg_162	0.833002269268036	0.00276710271221536
K06926	neg_162	0.842424213886261	0.00222003275351312
K03501	neg_162	0.806060612201691	0.0048620605246823
K01990	neg_162	0.866666674613953	0.0011735379121256
K03101	neg_162	0.830303013324738	0.00294022813612127
K00849	neg_162	0.818181812763214	0.00381492051076338
K06287	neg_162	0.818181812763214	0.00381492051076338
K00969	neg_162	0.854545474052429	0.00163680247839526
K20885	neg_162	0.818181812763214	0.00381492051076338
K00945	neg_162	0.818181812763214	0.00381492051076338
K05970	neg_162	0.842424213886261	0.00222003275351312
K05964	neg_162	-0.818181812763214	0.00381492051076338
K09789	neg_1649	0.806060612201691	0.0048620605246823
K13014	neg_1649	0.818181812763214	0.00381492051076338
K04748	neg_1649	-0.806060612201691	0.0048620605246823
K18692	neg_1649	-0.830303013324738	0.00294022813612127
K17680	neg_1649	-0.806060612201691	0.0048620605246823
K03415	neg_1649	-0.866666674613953	0.0011735379121256
K03651	neg_1717	-0.830303013324738	0.00294022813612127
K12072	neg_1717	0.862921476364136	0.00130486922968087
K02665	neg_1717	0.833002269268036	0.00276710271221536
K21217	neg_1717	0.887625336647034	0.000607926148504134
K19157	neg_1717	-0.818181812763214	0.00381492051076338
K06871	neg_1717	-0.842424213886261	0.00222003275351312
K16014	neg_1717	-0.906692802906036	0.000295911879524491
K06145	neg_1717	-0.878787875175476	0.000813862205061078
K03414	neg_1717	0.846658051013947	0.00200163182665913
K10942	neg_1717	0.846658051013947	0.00200163182665913
K03470	neg_1718	-0.856668412685394	0.00154747182074688
K09761	neg_1718	-0.925451993942261	0.000123404671922511
K00059	neg_1718	-0.806643962860107	0.00480744414521128
K00783	neg_1718	-0.875427544116974	0.000904110124716251
K03501	neg_1718	-0.881680607795715	0.000741594922435862
K01990	neg_1718	-0.83790922164917	0.00247136195299369
K03101	neg_1718	-0.956717252731323	1.45713471533249e-05
K06287	neg_1718	-0.912945866584778	0.000225958764512368
K11068	neg_1718	-0.894186735153198	0.000481835628326488
K00969	neg_1718	-0.925451993942261	0.000123404671922511
K00945	neg_1718	-0.90043979883194	0.000380598613888061
K03218	neg_1718	-0.856668412685394	0.00154747182074688
K05970	neg_1718	-0.850415349006653	0.00182121334938934
K00981	neg_1718	-0.931705057621002	8.75967112814457e-05
K03584	neg_1718	-0.906692802906036	0.000295911879524491
K01409	neg_1718	-0.806643962860107	0.00480744414521128
K00919	neg_1718	-0.894186735153198	0.000481835628326488
K02784	neg_1727	-0.818181812763214	0.00381492051076338
K12072	neg_1727	0.81915009021759	0.00373894966455346
K02665	neg_1727	0.826174378395081	0.00321991677364641
K16014	neg_1727	-0.850415349006653	0.00182121334938934
K06145	neg_1727	-0.830303013324738	0.00294022813612127
K20452	neg_1737	0.865095794200897	0.00122739260821847
K18298	neg_1737	0.939393937587738	5.48405364009241e-05
K11933	neg_176	0.938721001148224	5.72697606402439e-05
K10237	neg_176	0.808135211467743	0.00466981917809761
K03524	neg_176	-0.806060612201691	0.0048620605246823
K04096	neg_176	-0.830303013324738	0.00294022813612127
K04069	neg_176	-0.806060612201691	0.0048620605246823
K00817	neg_176	-0.830303013324738	0.00294022813612127
K02458	neg_176	0.938721001148224	5.72697606402439e-05
K03607	neg_176	0.805690705776215	0.00489692183645341
K01483	neg_176	0.818181812763214	0.00381492051076338
K02521	neg_176	0.927272737026215	0.000112034447641074
K00014	neg_176	-0.939393937587738	5.48405364009241e-05
K18537	neg_176	0.866666674613953	0.0011735379121256
K05851	neg_176	0.812897026538849	0.00424919679863534
K04486	neg_176	-0.806060612201691	0.0048620605246823
K14051	neg_176	-0.826174378395081	0.00321991677364641
K03724	neg_176	-0.830303013324738	0.00294022813612127
K06896	neg_176	-0.903030276298523	0.000343612565232743
K01060	neg_1781	0.830303013324738	0.00294022813612127
K11933	neg_1781	-0.975533545017242	1.52213781534627e-06
K07099	neg_1781	0.806060612201691	0.0048620605246823
K04075	neg_1781	0.806060612201691	0.0048620605246823
K07391	neg_1781	0.806060612201691	0.0048620605246823
K10237	neg_1781	-0.885716199874878	0.000648751005291714
K03524	neg_1781	0.866666674613953	0.0011735379121256
K04096	neg_1781	0.927272737026215	0.000112034447641074
K02461	neg_1781	-0.800390899181366	0.0054162086926719
K04069	neg_1781	0.842424213886261	0.00222003275351312
K09779	neg_1781	0.806060612201691	0.0048620605246823
K00817	neg_1781	0.854545474052429	0.00163680247839526
K06285	neg_1781	-0.854545474052429	0.00163680247839526
K02458	neg_1781	-0.889637529850006	0.000566964581027118
K04565	neg_1781	0.915151536464691	0.000204472206099204
K07031	neg_1781	-0.818181812763214	0.00381492051076338
K03607	neg_1781	-0.805690705776215	0.00489692183645341
K03643	neg_1781	0.806060612201691	0.0048620605246823
K00849	neg_1781	0.854545474052429	0.00163680247839526
K00014	neg_1781	0.818181812763214	0.00381492051076338
K18537	neg_1781	-0.878787875175476	0.000813862205061078
K07720	neg_1781	0.830303013324738	0.00294022813612127
K05851	neg_1781	-0.881680607795715	0.000741594922435862
K14051	neg_1781	0.873969614505768	0.000945449010965937
K03724	neg_1781	0.830303013324738	0.00294022813612127
K07139	neg_1791	0.830303013324738	0.00294022813612127
K05787	neg_1791	0.866666674613953	0.0011735379121256
K00059	neg_1791	0.830303013324738	0.00294022813612127
K08688	neg_1791	0.806060612201691	0.0048620605246823
K00588	neg_1791	-0.852824926376343	0.00171189540742711
K06926	neg_1791	0.818181812763214	0.00381492051076338
K09951	neg_1791	0.830303013324738	0.00294022813612127
K07672	neg_1796	0.812897026538849	0.00424919679863534
K01060	neg_1796	0.806060612201691	0.0048620605246823
K03827	neg_1796	-0.854545474052429	0.00163680247839526
K01261	neg_1796	0.854545474052429	0.00163680247839526
K03406	neg_1796	-0.830303013324738	0.00294022813612127
K03225	neg_1796	-0.915151536464691	0.000204472206099204
K09789	neg_1796	0.866666674613953	0.0011735379121256
K07039	neg_1796	0.818181812763214	0.00381492051076338
K16199	neg_1796	0.806060612201691	0.0048620605246823
K15652	neg_1796	0.927272737026215	0.000112034447641074
K20885	neg_1796	0.854545474052429	0.00163680247839526
K04085	neg_1796	-1	0
K00230	neg_1796	0.842424213886261	0.00222003275351312
K07341	neg_1796	0.903030276298523	0.000343612565232743
K03415	neg_1796	-0.806060612201691	0.0048620605246823
K01060	neg_1798	0.878787875175476	0.000813862205061078
K11933	neg_1798	-0.914179265499115	0.000213749081869885
K17329	neg_1798	-0.821065366268158	0.00359188206024896
K04096	neg_1798	0.842424213886261	0.00222003275351312
K00817	neg_1798	0.806060612201691	0.0048620605246823
K03412	neg_1798	-0.818181812763214	0.00381492051076338
K06285	neg_1798	-0.866666674613953	0.0011735379121256
K02458	neg_1798	-0.816012322902679	0.0039891464803441
K04565	neg_1798	0.830303013324738	0.00294022813612127
K07031	neg_1798	-0.903030276298523	0.000343612565232743
K21029	neg_1798	-0.866666674613953	0.0011735379121256
K18537	neg_1798	-0.854545474052429	0.00163680247839526
K00887	neg_1798	-0.866666674613953	0.0011735379121256
K07720	neg_1798	0.806060612201691	0.0048620605246823
K14051	neg_1798	0.873969614505768	0.000945449010965937
K07574	neg_1798	0.806060612201691	0.0048620605246823
K11933	neg_1804	-0.861575186252594	0.00135458546448364
K10237	neg_1804	-0.810595333576202	0.00444896679095952
K02461	neg_1804	-0.871820390224457	0.00100887727685151
K03651	neg_1804	0.814593434333801	0.00410613103846336
K21217	neg_1804	-0.814992010593414	0.00407302440095103
K19157	neg_1804	0.881463050842285	0.000746860533753502
K03414	neg_1804	-0.86978143453598	0.00107186247146052
K05802	neg_1804	-0.933805823326111	7.75059745339313e-05
K10942	neg_1804	-0.86978143453598	0.00107186247146052
K06311	neg_1804	-0.884146332740784	0.00068379278040176
K02919	neg_1804	-0.899700224399567	0.000391673296721073
K08714	neg_1852	0.906692802906036	0.000295911879524491
K01159	neg_1852	0.856668412685394	0.00154747182074688
K03470	neg_1852	0.844162285327911	0.00212839548320387
K07391	neg_1852	0.806643962860107	0.00480744414521128
K04061	neg_1852	-0.83790922164917	0.00247136195299369
K03524	neg_1852	0.844162285327911	0.00212839548320387
K07126	neg_1852	0.800390899181366	0.0054162086926719
K06167	neg_1852	0.844162285327911	0.00212839548320387
K06285	neg_1852	-0.81915009021759	0.00373894966455346
K02852	neg_1852	0.856668412685394	0.00154747182074688
K04565	neg_1852	0.831656157970428	0.00285249465359505
K07139	neg_1852	0.937958121299744	6.01189982394335e-05
K05787	neg_1852	0.956717252731323	1.45713471533249e-05
K00059	neg_1852	0.844162285327911	0.00212839548320387
K08688	neg_1852	0.806643962860107	0.00480744414521128
K03643	neg_1852	0.831656157970428	0.00285249465359505
K06179	neg_1852	0.856668412685394	0.00154747182074688
K06926	neg_1852	0.90043979883194	0.000380598613888061
K00783	neg_1852	0.869174480438232	0.00109115185763287
K03101	neg_1852	0.81915009021759	0.00373894966455346
K11068	neg_1852	0.894186735153198	0.000481835628326488
K05851	neg_1852	-0.800000011920929	0.00545599878335024
K14575	neg_1852	0.903180837631226	0.000341547437214818
K03584	neg_1852	0.800390899181366	0.0054162086926719
K14051	neg_1852	0.90172153711319	0.000361951655085679
K09951	neg_1852	0.831656157970428	0.00285249465359505
K08714	neg_1863	0.890909075737	0.000542144516154419
K01159	neg_1863	0.878787875175476	0.000813862205061078
K04061	neg_1863	-0.806060612201691	0.0048620605246823
K07126	neg_1863	0.842424213886261	0.00222003275351312
K12543	neg_1863	-0.842424213886261	0.00222003275351312
K07031	neg_1863	-0.903030276298523	0.000343612565232743
K07139	neg_1863	0.818181812763214	0.00381492051076338
K05787	neg_1863	0.854545474052429	0.00163680247839526
K00059	neg_1863	0.830303013324738	0.00294022813612127
K00588	neg_1863	-0.889637529850006	0.000566964581027118
K06926	neg_1863	0.866666674613953	0.0011735379121256
K09512	neg_1863	0.821065366268158	0.00359188206024896
K18298	neg_1863	-0.806060612201691	0.0048620605246823
K14051	neg_1863	0.826174378395081	0.00321991677364641
K00057	neg_1863	0.818181812763214	0.00381492051076338
K11754	neg_1874	-0.830303013324738	0.00294022813612127
K02784	neg_1874	-0.806060612201691	0.0048620605246823
K00059	neg_1874	-0.830303013324738	0.00294022813612127
K03501	neg_1874	-0.830303013324738	0.00294022813612127
K01990	neg_1874	-0.818181812763214	0.00381492051076338
K03101	neg_1874	-0.830303013324738	0.00294022813612127
K03218	neg_1874	-0.806060612201691	0.0048620605246823
K01060	neg_1886	0.854545474052429	0.00163680247839526
K04069	neg_1886	0.830303013324738	0.00294022813612127
K09779	neg_1886	0.806060612201691	0.0048620605246823
K07166	neg_1886	0.806060612201691	0.0048620605246823
K13798	neg_1886	-0.806060612201691	0.0048620605246823
K12231	neg_1886	-0.819346487522125	0.00372367376291516
K13611	neg_1886	-0.833995580673218	0.00270528265085312
K07720	neg_1886	0.842424213886261	0.00222003275351312
K10578	neg_1886	-0.873969614505768	0.000945449010965937
K04486	neg_1886	0.878787875175476	0.000813862205061078
K03724	neg_1886	0.854545474052429	0.00163680247839526
K08688	neg_1901	0.878787875175476	0.000813862205061078
K07043	neg_1901	0.830303013324738	0.00294022813612127
K08302	neg_1901	0.866666674613953	0.0011735379121256
K07031	neg_193	-0.866666674613953	0.0011735379121256
K21029	neg_193	-0.866666674613953	0.0011735379121256
K09512	neg_193	0.833995580673218	0.00270528265085312
K11933	neg_1993	-0.840554058551788	0.00232177976116144
K00817	neg_1993	0.854545474052429	0.00163680247839526
K02745	neg_1993	-0.806060612201691	0.0048620605246823
K04565	neg_1993	0.842424213886261	0.00222003275351312
K21217	neg_1993	-0.805690705776215	0.00489692183645341
K18692	neg_1993	-0.842424213886261	0.00222003275351312
K01524	neg_1993	0.927272737026215	0.000112034447641074
K03414	neg_1993	-0.873969614505768	0.000945449010965937
K05851	neg_1993	-0.90043979883194	0.000380598613888061
K10942	neg_1993	-0.873969614505768	0.000945449010965937
K03724	neg_1993	0.818181812763214	0.00381492051076338
K11933	neg_1996	-0.889637529850006	0.000566964581027118
K10237	neg_1996	-0.833995580673218	0.00270528265085312
K02461	neg_1996	-0.881680607795715	0.000741594922435862
K02458	neg_1996	-0.840554058551788	0.00232177976116144
K21217	neg_1996	-0.805690705776215	0.00489692183645341
K19157	neg_1996	0.842424213886261	0.00222003275351312
K18537	neg_1996	-0.854545474052429	0.00163680247839526
K03414	neg_1996	-0.873969614505768	0.000945449010965937
K05802	neg_1996	-0.924506723880768	0.000129632545059266
K05851	neg_1996	-0.800390899181366	0.0054162086926719
K10942	neg_1996	-0.873969614505768	0.000945449010965937
K06311	neg_1996	-0.899700224399567	0.000391673296721073
K02919	neg_1996	-0.878787875175476	0.000813862205061078
K00852	neg_1998	-0.854545474052429	0.00163680247839526
K10907	neg_1998	-0.842424213886261	0.00222003275351312
K00297	neg_1998	-0.818181812763214	0.00381492051076338
K01814	neg_1998	-0.818181812763214	0.00381492051076338
K02747	neg_1998	0.878787875175476	0.000813862205061078
K07454	neg_1998	-0.842424213886261	0.00222003275351312
K18348	neg_1998	-0.830303013324738	0.00294022813612127
K03660	neg_1998	-0.854545474052429	0.00163680247839526
K03407	neg_1998	0.890909075737	0.000542144516154419
K01191	neg_1998	-0.818181812763214	0.00381492051076338
K01151	neg_1998	-0.830303013324738	0.00294022813612127
K07039	neg_2032	-0.830303013324738	0.00294022813612127
K07396	neg_2032	0.806060612201691	0.0048620605246823
K00765	neg_2032	-0.854545474052429	0.00163680247839526
K10953	neg_2032	-0.937436878681183	6.21251750798635e-05
K19784	neg_2032	0.914179265499115	0.000213749081869885
K01661	neg_2032	0.866666674613953	0.0011735379121256
K17329	neg_2038	0.833995580673218	0.00270528265085312
K00100	neg_2038	0.818181812763214	0.00381492051076338
K00817	neg_2038	-0.818181812763214	0.00381492051076338
K10907	neg_2038	-0.878787875175476	0.000813862205061078
K00931	neg_2038	-0.927272737026215	0.000112034447641074
K03769	neg_2038	-0.830303013324738	0.00294022813612127
K01814	neg_2038	-0.951515138149261	2.27985739738035e-05
K12072	neg_2038	0.919198930263519	0.00016900592052238
K09815	neg_2038	-0.903030276298523	0.000343612565232743
K00013	neg_2038	-0.842424213886261	0.00222003275351312
K07121	neg_2038	0.854545474052429	0.00163680247839526
K13665	neg_2038	0.806060612201691	0.0048620605246823
K07454	neg_2038	-0.806060612201691	0.0048620605246823
K06871	neg_2038	-0.830303013324738	0.00294022813612127
K02778	neg_2038	0.854545474052429	0.00163680247839526
K03407	neg_2038	0.915151536464691	0.000204472206099204
K05836	neg_2038	-0.806060612201691	0.0048620605246823
K00009	neg_2038	-0.878787875175476	0.000813862205061078
K01649	neg_2038	-0.830303013324738	0.00294022813612127
K11933	neg_2056	-0.888198733329773	0.000596040365381301
K10237	neg_2056	-0.922830998897552	0.000141238827938484
K04096	neg_2056	0.80374151468277	0.00508357521208702
K02461	neg_2056	-0.879905462265015	0.000785360184749173
K02458	neg_2056	-0.838509321212769	0.00243683023127983
K04565	neg_2056	0.828283190727234	0.00307477558489877
K03607	neg_2056	-0.843286633491516	0.00217421422639408
K02521	neg_2056	-0.816012322902679	0.0039891464803441
K18537	neg_2056	-0.914179265499115	0.000213749081869885
K03414	neg_2056	-0.822550058364868	0.00348076923888341
K10942	neg_2056	-0.822550058364868	0.00348076923888341
K06311	neg_2056	-0.80003410577774	0.00545251995569918
K03724	neg_2056	0.852824926376343	0.00171189540742711
K02919	neg_2056	-0.828283190727234	0.00307477558489877
K11933	neg_2068	-0.840554058551788	0.00232177976116144
K17329	neg_2068	-0.833995580673218	0.00270528265085312
K04061	neg_2068	-0.830303013324738	0.00294022813612127
K04096	neg_2068	0.842424213886261	0.00222003275351312
K00817	neg_2068	0.842424213886261	0.00222003275351312
K19411	neg_2068	0.890909075737	0.000542144516154419
K03412	neg_2068	-0.842424213886261	0.00222003275351312
K06285	neg_2068	-0.890909075737	0.000542144516154419
K04565	neg_2068	0.842424213886261	0.00222003275351312
K03643	neg_2068	0.878787875175476	0.000813862205061078
K06926	neg_2068	0.806060612201691	0.0048620605246823
K13014	neg_2068	0.878787875175476	0.000813862205061078
K01524	neg_2068	0.878787875175476	0.000813862205061078
K03414	neg_2068	-0.819346487522125	0.00372367376291516
K05851	neg_2068	-0.869174480438232	0.00109115185763287
K10942	neg_2068	-0.819346487522125	0.00372367376291516
K14051	neg_2068	0.819346487522125	0.00372367376291516
K11933	neg_207	-0.80374151468277	0.00508357521208702
K01524	neg_207	0.927272737026215	0.000112034447641074
K03414	neg_207	-0.860313832759857	0.00140239962667921
K05802	neg_207	-0.859855890274048	0.00142005806532719
K05851	neg_207	-0.844162285327911	0.00212839548320387
K10942	neg_207	-0.860313832759857	0.00140239962667921
K00845	neg_2109	0.854545474052429	0.00163680247839526
K05946	neg_2109	0.830303013324738	0.00294022813612127
K07099	neg_2109	0.818181812763214	0.00381492051076338
K03827	neg_2109	-0.866666674613953	0.0011735379121256
K03225	neg_2109	-0.830303013324738	0.00294022813612127
K17331	neg_2109	0.873969614505768	0.000945449010965937
K07039	neg_2109	0.890909075737	0.000542144516154419
K00949	neg_2109	0.866666674613953	0.0011735379121256
K15599	neg_2109	-0.806060612201691	0.0048620605246823
K14170	neg_2109	0.806060612201691	0.0048620605246823
K07396	neg_2109	-0.903030276298523	0.000343612565232743
K05985	neg_2109	0.842424213886261	0.00222003275351312
K12231	neg_2109	-0.839830160140991	0.00236205253090405
K05989	neg_2109	0.854545474052429	0.00163680247839526
K09777	neg_2109	0.830303013324738	0.00294022813612127
K16199	neg_2109	0.830303013324738	0.00294022813612127
K15652	neg_2109	0.878787875175476	0.000813862205061078
K04085	neg_2109	-0.830303013324738	0.00294022813612127
K07707	neg_2109	-0.842424213886261	0.00222003275351312
K08714	neg_2116	0.842424213886261	0.00222003275351312
K01060	neg_2116	0.927272737026215	0.000112034447641074
K05946	neg_2116	0.854545474052429	0.00163680247839526
K11933	neg_2116	-0.865095794200897	0.00122739260821847
K07099	neg_2116	0.854545474052429	0.00163680247839526
K07391	neg_2116	0.830303013324738	0.00294022813612127
K10237	neg_2116	-0.821065366268158	0.00359188206024896
K04061	neg_2116	-0.806060612201691	0.0048620605246823
K01714	neg_2116	0.878787875175476	0.000813862205061078
K04096	neg_2116	0.806060612201691	0.0048620605246823
K04069	neg_2116	0.903030276298523	0.000343612565232743
K09779	neg_2116	0.842424213886261	0.00222003275351312
K02745	neg_2116	-0.818181812763214	0.00381492051076338
K07166	neg_2116	0.927272737026215	0.000112034447641074
K00852	neg_2116	0.866666674613953	0.0011735379121256
K03412	neg_2116	-0.806060612201691	0.0048620605246823
K04565	neg_2116	0.842424213886261	0.00222003275351312
K13798	neg_2116	-0.854545474052429	0.00163680247839526
K05787	neg_2116	0.818181812763214	0.00381492051076338
K12231	neg_2116	-0.846658051013947	0.00200163182665913
K01295	neg_2116	0.842424213886261	0.00222003275351312
K18348	neg_2116	0.806060612201691	0.0048620605246823
K13611	neg_2116	-0.808135211467743	0.00466981917809761
K00887	neg_2116	-0.818181812763214	0.00381492051076338
K07720	neg_2116	0.890909075737	0.000542144516154419
K10578	neg_2116	-0.887625336647034	0.000607926148504134
K07493	neg_2116	-0.825403153896332	0.00327420560319291
K04486	neg_2116	0.878787875175476	0.000813862205061078
K14051	neg_2116	0.846658051013947	0.00200163182665913
K03724	neg_2116	0.927272737026215	0.000112034447641074
K07574	neg_2116	0.806060612201691	0.0048620605246823
K17329	neg_2134	-0.859855890274048	0.00142005806532719
K02461	neg_2134	-0.856668412685394	0.00154747182074688
K03651	neg_2134	0.806060612201691	0.0048620605246823
K01814	neg_2134	0.818181812763214	0.00381492051076338
K12072	neg_2134	-0.831656157970428	0.00285249465359505
K00013	neg_2134	0.830303013324738	0.00294022813612127
K02665	neg_2134	-0.805690705776215	0.00489692183645341
K19157	neg_2134	0.806060612201691	0.0048620605246823
K04748	neg_2134	-0.818181812763214	0.00381492051076338
K16014	neg_2134	0.844162285327911	0.00212839548320387
K05802	neg_2134	-0.898646354675293	0.000407860267078952
K06311	neg_2134	-0.808514356613159	0.00463528246178302
K01649	neg_2134	0.830303013324738	0.00294022813612127
K02493	neg_2135	0.854545474052429	0.00163680247839526
K02784	neg_2135	0.878787875175476	0.000813862205061078
K03769	neg_2135	0.818181812763214	0.00381492051076338
K20525	neg_2135	0.806060612201691	0.0048620605246823
K02461	neg_2157	-0.812897026538849	0.00424919679863534
K19157	neg_2157	0.854545474052429	0.00163680247839526
K03414	neg_2157	-0.819346487522125	0.00372367376291516
K05802	neg_2157	-0.924506723880768	0.000129632545059266
K10942	neg_2157	-0.819346487522125	0.00372367376291516
K06311	neg_2157	-0.887542068958282	0.000609666476501403
K02919	neg_2157	-0.806060612201691	0.0048620605246823
K08714	neg_2164	0.806060612201691	0.0048620605246823
K01060	neg_2164	0.878787875175476	0.000813862205061078
K11933	neg_2164	-0.950991809368134	2.37837330223645e-05
K10237	neg_2164	-0.846925735473633	0.0019883679465349
K03524	neg_2164	0.806060612201691	0.0048620605246823
K01714	neg_2164	0.830303013324738	0.00294022813612127
K04096	neg_2164	0.854545474052429	0.00163680247839526
K04069	neg_2164	0.842424213886261	0.00222003275351312
K00817	neg_2164	0.830303013324738	0.00294022813612127
K06285	neg_2164	-0.806060612201691	0.0048620605246823
K02458	neg_2164	-0.865095794200897	0.00122739260821847
K04565	neg_2164	0.854545474052429	0.00163680247839526
K07031	neg_2164	-0.854545474052429	0.00163680247839526
K21029	neg_2164	-0.830303013324738	0.00294022813612127
K12231	neg_2164	-0.833002269268036	0.00276710271221536
K02521	neg_2164	-0.818181812763214	0.00381492051076338
K00014	neg_2164	0.806060612201691	0.0048620605246823
K18537	neg_2164	-0.903030276298523	0.000343612565232743
K00887	neg_2164	-0.854545474052429	0.00163680247839526
K07720	neg_2164	0.830303013324738	0.00294022813612127
K10578	neg_2164	-0.819346487522125	0.00372367376291516
K05851	neg_2164	-0.81915009021759	0.00373894966455346
K14051	neg_2164	0.887625336647034	0.000607926148504134
K03724	neg_2164	0.866666674613953	0.0011735379121256
K07574	neg_2164	0.806060612201691	0.0048620605246823
K11933	neg_2197	-0.900621116161346	0.000377918936301569
K17329	neg_2197	-0.870471775531769	0.00105022593325454
K10237	neg_2197	-0.831202387809753	0.00288170263251697
K04061	neg_2197	-0.828283190727234	0.00307477558489877
K04096	neg_2197	0.828283190727234	0.00307477558489877
K02461	neg_2197	-0.867244958877563	0.00115415224037485
K07126	neg_2197	0.816012322902679	0.0039891464803441
K03651	neg_2197	0.840554058551788	0.00232177976116144
K04565	neg_2197	0.80374151468277	0.00508357521208702
K02665	neg_2197	-0.8156378865242	0.00401978302331507
K05830	neg_2197	-0.80374151468277	0.00508357521208702
K21217	neg_2197	-0.8156378865242	0.00401978302331507
K06926	neg_2197	0.889637529850006	0.000566964581027118
K19157	neg_2197	0.828283190727234	0.00307477558489877
K04748	neg_2197	-0.80374151468277	0.00508357521208702
K06145	neg_2197	0.80374151468277	0.00508357521208702
K03414	neg_2197	-0.843286633491516	0.00217421422639408
K05802	neg_2197	-0.883561611175537	0.000697191219888094
K05851	neg_2197	-0.848254203796387	0.00192348015922827
K10942	neg_2197	-0.843286633491516	0.00217421422639408
K14051	neg_2197	0.850198805332184	0.00183127870149313
K03724	neg_2197	0.80374151468277	0.00508357521208702
K02919	neg_2197	-0.840554058551788	0.00232177976116144
K06285	neg_2251	-0.866666674613953	0.0011735379121256
K03643	neg_2251	0.927272737026215	0.000112034447641074
K14575	neg_2251	0.857146799564362	0.0015278405327328
K01409	neg_2251	0.818181812763214	0.00381492051076338
K11933	neg_2257	-0.80618816614151	0.00485008058916403
K17329	neg_2257	-0.849503874778748	0.00186385232781783
K02461	neg_2257	-0.853004157543182	0.00170395875980178
K03651	neg_2257	0.808514356613159	0.00463528246178302
K02665	neg_2257	-0.814992010593414	0.00407302440095103
K19157	neg_2257	0.83890962600708	0.00241398974898654
K03414	neg_2257	-0.808143377304077	0.00466907341223743
K05802	neg_2257	-0.914351522922516	0.000212083364557358
K10942	neg_2257	-0.808143377304077	0.00466907341223743
K09512	neg_2257	0.810595333576202	0.00444896679095952
K06311	neg_2257	-0.878048777580261	0.000833121234763867
K02919	neg_2257	-0.814593434333801	0.00410613103846336
K11933	neg_2264	0.865095794200897	0.00122739260821847
K10237	neg_2264	0.821065366268158	0.00359188206024896
K04096	neg_2264	-0.806060612201691	0.0048620605246823
K02461	neg_2264	0.912945866584778	0.000225958764512368
K02458	neg_2264	0.865095794200897	0.00122739260821847
K04565	neg_2264	-0.806060612201691	0.0048620605246823
K21217	neg_2264	0.873969614505768	0.000945449010965937
K19157	neg_2264	-0.854545474052429	0.00163680247839526
K03414	neg_2264	0.873969614505768	0.000945449010965937
K05802	neg_2264	0.872786045074463	0.000980007503875058
K05851	neg_2264	0.894186735153198	0.000481835628326488
K10942	neg_2264	0.873969614505768	0.000945449010965937
K06311	neg_2264	0.802435338497162	0.00521145970824932
K01060	neg_2267	0.890909075737	0.000542144516154419
K05946	neg_2267	0.818181812763214	0.00381492051076338
K09779	neg_2267	0.818181812763214	0.00381492051076338
K07166	neg_2267	0.818181812763214	0.00381492051076338
K04565	neg_2267	0.806060612201691	0.0048620605246823
K13798	neg_2267	-0.830303013324738	0.00294022813612127
K03607	neg_2267	-0.819346487522125	0.00372367376291516
K12231	neg_2267	-0.887625336647034	0.000607926148504134
K20452	neg_2267	-0.865095794200897	0.00122739260821847
K13611	neg_2267	-0.808135211467743	0.00466981917809761
K07720	neg_2267	0.806060612201691	0.0048620605246823
K10578	neg_2267	-0.846658051013947	0.00200163182665913
K04486	neg_2267	0.806060612201691	0.0048620605246823
K11933	neg_2280	-0.849266946315765	0.00187505312445646
K10237	neg_2280	-0.849503874778748	0.00186385232781783
K02461	neg_2280	-0.896908760070801	0.000435612478490999
K03651	neg_2280	0.802435338497162	0.00521145970824932
K02458	neg_2280	-0.80003410577774	0.00545251995569918
K21217	neg_2280	-0.828689396381378	0.00304736829502406
K19157	neg_2280	0.881463050842285	0.000746860533753502
K18537	neg_2280	-0.826751530170441	0.00317971472634282
K16014	neg_2280	0.821643710136414	0.00354830133511608
K03414	neg_2280	-0.883478760719299	0.000699105060886662
K05802	neg_2280	-0.920836269855499	0.000156033361973673
K10942	neg_2280	-0.883478760719299	0.000699105060886662
K06311	neg_2280	-0.896341443061829	0.000444965811158937
K02919	neg_2280	-0.875383973121643	0.00090532610126548
K19157	neg_2282	0.842424213886261	0.00222003275351312
K01524	neg_2282	0.806060612201691	0.0048620605246823
K03414	neg_2282	-0.860313832759857	0.00140239962667921
K05802	neg_2282	-0.937436878681183	6.21251750798635e-05
K10942	neg_2282	-0.860313832759857	0.00140239962667921
K06311	neg_2282	-0.893621146678925	0.000491873064334847
K02919	neg_2282	-0.806060612201691	0.0048620605246823
K07043	neg_2298	0.842424213886261	0.00222003275351312
K02493	neg_2310	-0.927272737026215	0.000112034447641074
K02784	neg_2310	-0.830303013324738	0.00294022813612127
K03769	neg_2310	-0.878787875175476	0.000813862205061078
K19334	neg_2310	-0.806060612201691	0.0048620605246823
K02665	neg_2310	0.826174378395081	0.00321991677364641
K01409	neg_2310	-0.842424213886261	0.00222003275351312
K00919	neg_2310	-0.806060612201691	0.0048620605246823
K20525	neg_2310	-0.842424213886261	0.00222003275351312
K11933	neg_2373	-0.80374151468277	0.00508357521208702
K02461	neg_2373	-0.806643962860107	0.00480744414521128
K21217	neg_2373	-0.805690705776215	0.00489692183645341
K19157	neg_2373	0.806060612201691	0.0048620605246823
K18692	neg_2373	-0.806060612201691	0.0048620605246823
K03414	neg_2373	-0.873969614505768	0.000945449010965937
K05802	neg_2373	-0.885716199874878	0.000648751005291714
K10942	neg_2373	-0.873969614505768	0.000945449010965937
K06311	neg_2373	-0.942253589630127	4.53587077142714e-05
K01261	neg_2383	-0.866666674613953	0.0011735379121256
K09789	neg_2383	-0.818181812763214	0.00381492051076338
K20452	neg_2383	0.816012322902679	0.0039891464803441
K18298	neg_2383	0.878787875175476	0.000813862205061078
K02491	neg_2383	0.889637529850006	0.000566964581027118
K05946	neg_2400	0.866666674613953	0.0011735379121256
K01159	neg_2400	0.830303013324738	0.00294022813612127
K04061	neg_2400	-0.890909075737	0.000542144516154419
K01729	neg_2400	0.818181812763214	0.00381492051076338
K09761	neg_2400	0.866666674613953	0.0011735379121256
K04565	neg_2400	0.842424213886261	0.00222003275351312
K07139	neg_2400	0.842424213886261	0.00222003275351312
K05787	neg_2400	0.927272737026215	0.000112034447641074
K20452	neg_2400	-0.901908397674561	0.000359290276283897
K00969	neg_2400	0.806060612201691	0.0048620605246823
K14575	neg_2400	0.802435338497162	0.00521145970824932
K05964	neg_2400	-0.890909075737	0.000542144516154419
K11933	neg_2415	-0.886191606521606	0.000638403173477631
K10237	neg_2415	-0.849503874778748	0.00186385232781783
K04096	neg_2415	0.802435338497162	0.00521145970824932
K02461	neg_2415	-0.896908760070801	0.000435612478490999
K02458	neg_2415	-0.836958706378937	0.00252677787751843
K21217	neg_2415	-0.828689396381378	0.00304736829502406
K19157	neg_2415	0.869304955005646	0.00108698415655106
K18537	neg_2415	-0.83890962600708	0.00241398974898654
K03414	neg_2415	-0.883478760719299	0.000699105060886662
K05802	neg_2415	-0.920836269855499	0.000156033361973673
K05851	neg_2415	-0.815371572971344	0.00404167522068155
K10942	neg_2415	-0.883478760719299	0.000699105060886662
K06311	neg_2415	-0.896341443061829	0.000444965811158937
K02919	neg_2415	-0.887542068958282	0.000609666476501403
K11933	neg_2446	-0.80374151468277	0.00508357521208702
K17329	neg_2446	-0.808135211467743	0.00466981917809761
K02461	neg_2446	-0.894186735153198	0.000481835628326488
K03651	neg_2446	0.842424213886261	0.00222003275351312
K02665	neg_2446	-0.819346487522125	0.00372367376291516
K05830	neg_2446	-0.818181812763214	0.00381492051076338
K21217	neg_2446	-0.846658051013947	0.00200163182665913
K06926	neg_2446	0.830303013324738	0.00294022813612127
K19157	neg_2446	0.939393937587738	5.48405364009241e-05
K06145	neg_2446	0.806060612201691	0.0048620605246823
K03414	neg_2446	-0.846658051013947	0.00200163182665913
K05802	neg_2446	-0.898646354675293	0.000407860267078952
K10942	neg_2446	-0.846658051013947	0.00200163182665913
K06311	neg_2446	-0.83890962600708	0.00241398974898654
K02919	neg_2446	-0.866666674613953	0.0011735379121256
K07031	neg_2456	-0.806643962860107	0.00480744414521128
K09512	neg_2456	0.953863382339478	1.87461202005856e-05
K06139	neg_2456	0.825403153896332	0.00327420560319291
K02461	neg_2461	-0.850415349006653	0.00182121334938934
K21217	neg_2461	-0.833002269268036	0.00276710271221536
K19157	neg_2461	0.890909075737	0.000542144516154419
K03414	neg_2461	-0.873969614505768	0.000945449010965937
K05802	neg_2461	-0.924506723880768	0.000129632545059266
K10942	neg_2461	-0.873969614505768	0.000945449010965937
K06311	neg_2461	-0.930095493793488	9.59607762942571e-05
K02919	neg_2461	-0.854545474052429	0.00163680247839526
K11933	neg_2462	-0.889637529850006	0.000566964581027118
K17329	neg_2462	-0.821065366268158	0.00359188206024896
K10237	neg_2462	-0.885716199874878	0.000648751005291714
K02461	neg_2462	-0.869174480438232	0.00109115185763287
K03651	neg_2462	0.842424213886261	0.00222003275351312
K21217	neg_2462	-0.805690705776215	0.00489692183645341
K19157	neg_2462	0.818181812763214	0.00381492051076338
K04748	neg_2462	-0.818181812763214	0.00381492051076338
K18537	neg_2462	-0.866666674613953	0.0011735379121256
K18692	neg_2462	-0.806060612201691	0.0048620605246823
K06145	neg_2462	0.818181812763214	0.00381492051076338
K03414	neg_2462	-0.873969614505768	0.000945449010965937
K05802	neg_2462	-0.885716199874878	0.000648751005291714
K10942	neg_2462	-0.873969614505768	0.000945449010965937
K06311	neg_2462	-0.863225877285004	0.00129381457010247
K03724	neg_2462	0.854545474052429	0.00163680247839526
K02919	neg_2462	-0.854545474052429	0.00163680247839526
K00845	neg_2485	0.854545474052429	0.00163680247839526
K01060	neg_2485	0.890909075737	0.000542144516154419
K11933	neg_2485	-0.889637529850006	0.000566964581027118
K07099	neg_2485	0.818181812763214	0.00381492051076338
K04075	neg_2485	0.806060612201691	0.0048620605246823
K10237	neg_2485	-0.808135211467743	0.00466981917809761
K01714	neg_2485	0.878787875175476	0.000813862205061078
K04069	neg_2485	0.903030276298523	0.000343612565232743
K00817	neg_2485	0.866666674613953	0.0011735379121256
K07166	neg_2485	0.854545474052429	0.00163680247839526
K00852	neg_2485	0.830303013324738	0.00294022813612127
K04565	neg_2485	0.818181812763214	0.00381492051076338
K13798	neg_2485	-0.842424213886261	0.00222003275351312
K12231	neg_2485	-0.833002269268036	0.00276710271221536
K01295	neg_2485	0.842424213886261	0.00222003275351312
K02521	neg_2485	-0.806060612201691	0.0048620605246823
K00014	neg_2485	0.818181812763214	0.00381492051076338
K13611	neg_2485	-0.821065366268158	0.00359188206024896
K00887	neg_2485	-0.842424213886261	0.00222003275351312
K07720	neg_2485	0.890909075737	0.000542144516154419
K10578	neg_2485	-0.819346487522125	0.00372367376291516
K05851	neg_2485	-0.806643962860107	0.00480744414521128
K04486	neg_2485	0.915151536464691	0.000204472206099204
K14051	neg_2485	0.833002269268036	0.00276710271221536
K03724	neg_2485	0.915151536464691	0.000204472206099204
K07574	neg_2485	0.854545474052429	0.00163680247839526
K06896	neg_2485	0.842424213886261	0.00222003275351312
K01060	neg_2505	0.818181812763214	0.00381492051076338
K11933	neg_2505	-0.926450133323669	0.000117071096429999
K17329	neg_2505	-0.833995580673218	0.00270528265085312
K07391	neg_2505	0.818181812763214	0.00381492051076338
K10237	neg_2505	-0.846925735473633	0.0019883679465349
K04061	neg_2505	-0.878787875175476	0.000813862205061078
K04096	neg_2505	0.903030276298523	0.000343612565232743
K04069	neg_2505	0.842424213886261	0.00222003275351312
K00817	neg_2505	0.830303013324738	0.00294022813612127
K02745	neg_2505	-0.842424213886261	0.00222003275351312
K00852	neg_2505	0.806060612201691	0.0048620605246823
K19411	neg_2505	0.854545474052429	0.00163680247839526
K06285	neg_2505	-0.854545474052429	0.00163680247839526
K04565	neg_2505	0.903030276298523	0.000343612565232743
K03643	neg_2505	0.830303013324738	0.00294022813612127
K06926	neg_2505	0.866666674613953	0.0011735379121256
K01524	neg_2505	0.866666674613953	0.0011735379121256
K03414	neg_2505	-0.860313832759857	0.00140239962667921
K05802	neg_2505	-0.821065366268158	0.00359188206024896
K05851	neg_2505	-0.894186735153198	0.000481835628326488
K10942	neg_2505	-0.860313832759857	0.00140239962667921
K14051	neg_2505	0.860313832759857	0.00140239962667921
K03724	neg_2505	0.830303013324738	0.00294022813612127
K01060	neg_2564	0.890909075737	0.000542144516154419
K11933	neg_2564	-0.840554058551788	0.00232177976116144
K04069	neg_2564	0.830303013324738	0.00294022813612127
K04565	neg_2564	0.830303013324738	0.00294022813612127
K12231	neg_2564	-0.833002269268036	0.00276710271221536
K18537	neg_2564	-0.842424213886261	0.00222003275351312
K07720	neg_2564	0.842424213886261	0.00222003275351312
K10578	neg_2564	-0.819346487522125	0.00372367376291516
K04486	neg_2564	0.854545474052429	0.00163680247839526
K03724	neg_2564	0.854545474052429	0.00163680247839526
K17329	neg_2570	-0.821065366268158	0.00359188206024896
K02461	neg_2570	-0.825403153896332	0.00327420560319291
K03651	neg_2570	0.854545474052429	0.00163680247839526
K02665	neg_2570	-0.833002269268036	0.00276710271221536
K19157	neg_2570	0.903030276298523	0.000343612565232743
K04748	neg_2570	-0.818181812763214	0.00381492051076338
K16014	neg_2570	0.844162285327911	0.00212839548320387
K06145	neg_2570	0.830303013324738	0.00294022813612127
K05802	neg_2570	-0.898646354675293	0.000407860267078952
K06311	neg_2570	-0.851067781448364	0.00179112909994994
K06167	neg_26	-0.806060612201691	0.0048620605246823
K02852	neg_26	-0.830303013324738	0.00294022813612127
K15045	neg_26	-0.842424213886261	0.00222003275351312
K03573	neg_26	-0.830303013324738	0.00294022813612127
K07043	neg_26	-0.806060612201691	0.0048620605246823
K05970	neg_26	-0.842424213886261	0.00222003275351312
K02566	neg_26	-0.842424213886261	0.00222003275351312
K01191	neg_26	-0.818181812763214	0.00381492051076338
K00845	neg_2627	-0.818181812763214	0.00381492051076338
K00640	neg_2627	-0.806060612201691	0.0048620605246823
K07672	neg_2627	-0.862921476364136	0.00130486922968087
K17329	neg_2627	0.833995580673218	0.00270528265085312
K03827	neg_2627	0.903030276298523	0.000343612565232743
K01261	neg_2627	-0.842424213886261	0.00222003275351312
K00100	neg_2627	0.890909075737	0.000542144516154419
K19411	neg_2627	-0.818181812763214	0.00381492051076338
K03225	neg_2627	0.866666674613953	0.0011735379121256
K10907	neg_2627	-0.842424213886261	0.00222003275351312
K03769	neg_2627	-0.890909075737	0.000542144516154419
K17331	neg_2627	-0.873969614505768	0.000945449010965937
K09815	neg_2627	-0.842424213886261	0.00222003275351312
K19334	neg_2627	-0.878787875175476	0.000813862205061078
K09789	neg_2627	-0.866666674613953	0.0011735379121256
K07121	neg_2627	0.903030276298523	0.000343612565232743
K07039	neg_2627	-0.842424213886261	0.00222003275351312
K13665	neg_2627	0.903030276298523	0.000343612565232743
K07396	neg_2627	0.818181812763214	0.00381492051076338
K00344	neg_2627	-0.806060612201691	0.0048620605246823
K04748	neg_2627	0.806060612201691	0.0048620605246823
K02778	neg_2627	0.842424213886261	0.00222003275351312
K15652	neg_2627	-0.842424213886261	0.00222003275351312
K20885	neg_2627	-0.806060612201691	0.0048620605246823
K04085	neg_2627	0.927272737026215	0.000112034447641074
K00230	neg_2627	-0.866666674613953	0.0011735379121256
K07341	neg_2627	-0.830303013324738	0.00294022813612127
K05836	neg_2627	-0.927272737026215	0.000112034447641074
K18198	neg_2643	-0.866666674613953	0.0011735379121256
K00640	neg_2643	0.818181812763214	0.00381492051076338
K11933	neg_2643	-0.852824926376343	0.00171189540742711
K17329	neg_2643	-0.821065366268158	0.00359188206024896
K10237	neg_2643	-0.885716199874878	0.000648751005291714
K04096	neg_2643	0.818181812763214	0.00381492051076338
K02461	neg_2643	-0.869174480438232	0.00109115185763287
K03651	neg_2643	0.830303013324738	0.00294022813612127
K21217	neg_2643	-0.805690705776215	0.00489692183645341
K04748	neg_2643	-0.806060612201691	0.0048620605246823
K18537	neg_2643	-0.830303013324738	0.00294022813612127
K06145	neg_2643	0.830303013324738	0.00294022813612127
K03414	neg_2643	-0.873969614505768	0.000945449010965937
K05802	neg_2643	-0.885716199874878	0.000648751005291714
K10942	neg_2643	-0.873969614505768	0.000945449010965937
K06311	neg_2643	-0.924016416072845	0.000132952728702396
K02919	neg_2643	-0.818181812763214	0.00381492051076338
K02745	neg_2684	-0.83890962600708	0.00241398974898654
K01814	neg_2684	0.857146799564362	0.0015278405327328
K12072	neg_2684	-0.834187865257263	0.00269343151576251
K21217	neg_2684	-0.828689396381378	0.00304736829502406
K02747	neg_2684	-0.820672512054443	0.00362170350001234
K02501	neg_2684	0.924016416072845	0.000132952728702396
K18692	neg_2684	-0.857146799564362	0.0015278405327328
K16014	neg_2684	0.834187865257263	0.00269343151576251
K06145	neg_2684	0.826751530170441	0.00317971472634282
K03407	neg_2684	-0.863225877285004	0.00129381457010247
K03414	neg_2684	-0.883478760719299	0.000699105060886662
K10942	neg_2684	-0.883478760719299	0.000699105060886662
K02746	neg_2684	-0.875383973121643	0.00090532610126548
K03724	neg_2684	0.851067781448364	0.00179112909994994
K06305	neg_2684	-0.802435338497162	0.00521145970824932
K02493	neg_2705	0.866666674613953	0.0011735379121256
K03769	neg_2705	0.806060612201691	0.0048620605246823
K17331	neg_2705	0.887625336647034	0.000607926148504134
K19334	neg_2705	0.830303013324738	0.00294022813612127
K01990	neg_2705	0.806060612201691	0.0048620605246823
K00344	neg_2705	0.854545474052429	0.00163680247839526
K05970	neg_2705	0.818181812763214	0.00381492051076338
K00919	neg_2705	0.818181812763214	0.00381492051076338
K20525	neg_2705	0.854545474052429	0.00163680247839526
K11933	neg_2738	0.840554058551788	0.00232177976116144
K17329	neg_2738	0.859855890274048	0.00142005806532719
K04061	neg_2738	0.830303013324738	0.00294022813612127
K07126	neg_2738	-0.842424213886261	0.00222003275351312
K19411	neg_2738	-0.806060612201691	0.0048620605246823
K03651	neg_2738	-0.854545474052429	0.00163680247839526
K05830	neg_2738	0.818181812763214	0.00381492051076338
K00588	neg_2738	0.80374151468277	0.00508357521208702
K07454	neg_2738	-0.854545474052429	0.00163680247839526
K06926	neg_2738	-0.890909075737	0.000542144516154419
K04748	neg_2738	0.854545474052429	0.00163680247839526
K00887	neg_2738	0.842424213886261	0.00222003275351312
K05802	neg_2738	0.808135211467743	0.00466981917809761
K14051	neg_2738	-0.839830160140991	0.00236205253090405
K02919	neg_2738	0.806060612201691	0.0048620605246823
K01261	neg_2754	0.806060612201691	0.0048620605246823
K20452	neg_2754	-0.828283190727234	0.00307477558489877
K18298	neg_2754	-0.842424213886261	0.00222003275351312
K02491	neg_2754	-0.828283190727234	0.00307477558489877
K08302	neg_2754	0.806060612201691	0.0048620605246823
K02784	neg_2788	-0.806060612201691	0.0048620605246823
K09761	neg_2788	-0.854545474052429	0.00163680247839526
K01990	neg_2788	-0.806060612201691	0.0048620605246823
K00969	neg_2788	-0.842424213886261	0.00222003275351312
K01809	neg_2788	-0.903030276298523	0.000343612565232743
K00945	neg_2788	-0.818181812763214	0.00381492051076338
K05970	neg_2788	-0.878787875175476	0.000813862205061078
K05964	neg_2788	0.854545474052429	0.00163680247839526
K02458	neg_2801	0.840554058551788	0.00232177976116144
K07031	neg_2801	0.830303013324738	0.00294022813612127
K21029	neg_2801	0.806060612201691	0.0048620605246823
K18537	neg_2801	0.866666674613953	0.0011735379121256
K09512	neg_2801	-0.859855890274048	0.00142005806532719
K02919	neg_2801	0.830303013324738	0.00294022813612127
K05946	neg_2803	0.806060612201691	0.0048620605246823
K01159	neg_2803	0.818181812763214	0.00381492051076338
K04061	neg_2803	-0.915151536464691	0.000204472206099204
K01729	neg_2803	0.842424213886261	0.00222003275351312
K07139	neg_2803	0.842424213886261	0.00222003275351312
K05787	neg_2803	0.927272737026215	0.000112034447641074
K20452	neg_2803	-0.852824926376343	0.00171189540742711
K06926	neg_2803	0.818181812763214	0.00381492051076338
K18298	neg_2803	-0.806060612201691	0.0048620605246823
K05964	neg_2803	-0.878787875175476	0.000813862205061078
K01060	neg_2833	0.830303013324738	0.00294022813612127
K11933	neg_2833	-0.938721001148224	5.72697606402439e-05
K10237	neg_2833	-0.808135211467743	0.00466981917809761
K03524	neg_2833	0.854545474052429	0.00163680247839526
K04096	neg_2833	0.878787875175476	0.000813862205061078
K04069	neg_2833	0.818181812763214	0.00381492051076338
K09779	neg_2833	0.854545474052429	0.00163680247839526
K00817	neg_2833	0.806060612201691	0.0048620605246823
K02458	neg_2833	-0.877366662025452	0.000851188393096614
K04565	neg_2833	0.866666674613953	0.0011735379121256
K07031	neg_2833	-0.842424213886261	0.00222003275351312
K12231	neg_2833	-0.833002269268036	0.00276710271221536
K01295	neg_2833	0.830303013324738	0.00294022813612127
K01483	neg_2833	-0.818181812763214	0.00381492051076338
K00014	neg_2833	0.818181812763214	0.00381492051076338
K18537	neg_2833	-0.878787875175476	0.000813862205061078
K07720	neg_2833	0.854545474052429	0.00163680247839526
K10578	neg_2833	-0.819346487522125	0.00372367376291516
K05851	neg_2833	-0.806643962860107	0.00480744414521128
K14051	neg_2833	0.873969614505768	0.000945449010965937
K07574	neg_2833	0.842424213886261	0.00222003275351312
K00845	neg_2842	0.806060612201691	0.0048620605246823
K00640	neg_2842	0.806060612201691	0.0048620605246823
K01060	neg_2842	0.830303013324738	0.00294022813612127
K05946	neg_2842	0.866666674613953	0.0011735379121256
K11933	neg_2842	-0.938721001148224	5.72697606402439e-05
K07099	neg_2842	0.915151536464691	0.000204472206099204
K04075	neg_2842	0.866666674613953	0.0011735379121256
K03470	neg_2842	0.830303013324738	0.00294022813612127
K07391	neg_2842	0.878787875175476	0.000813862205061078
K10237	neg_2842	-0.898646354675293	0.000407860267078952
K04061	neg_2842	-0.818181812763214	0.00381492051076338
K03524	neg_2842	0.903030276298523	0.000343612565232743
K04096	neg_2842	0.975757598876953	1.46754063035104e-06
K04069	neg_2842	0.915151536464691	0.000204472206099204
K09779	neg_2842	0.890909075737	0.000542144516154419
K00817	neg_2842	0.866666674613953	0.0011735379121256
K07166	neg_2842	0.842424213886261	0.00222003275351312
K00852	neg_2842	0.842424213886261	0.00222003275351312
K19411	neg_2842	0.842424213886261	0.00222003275351312
K00800	neg_2842	0.866666674613953	0.0011735379121256
K06285	neg_2842	-0.866666674613953	0.0011735379121256
K04565	neg_2842	0.951515138149261	2.27985739738035e-05
K15599	neg_2842	-0.806060612201691	0.0048620605246823
K03643	neg_2842	0.830303013324738	0.00294022813612127
K05985	neg_2842	0.806060612201691	0.0048620605246823
K06926	neg_2842	0.818181812763214	0.00381492051076338
K09777	neg_2842	0.830303013324738	0.00294022813612127
K00859	neg_2842	0.854545474052429	0.00163680247839526
K01295	neg_2842	0.866666674613953	0.0011735379121256
K00849	neg_2842	0.915151536464691	0.000204472206099204
K04517	neg_2842	0.903030276298523	0.000343612565232743
K07720	neg_2842	0.915151536464691	0.000204472206099204
K10578	neg_2842	-0.805690705776215	0.00489692183645341
K03414	neg_2842	-0.826174378395081	0.00321991677364641
K05851	neg_2842	-0.894186735153198	0.000481835628326488
K04486	neg_2842	0.818181812763214	0.00381492051076338
K10942	neg_2842	-0.826174378395081	0.00321991677364641
K01736	neg_2842	0.818181812763214	0.00381492051076338
K07053	neg_2842	0.818181812763214	0.00381492051076338
K09775	neg_2842	0.866666674613953	0.0011735379121256
K03724	neg_2842	0.830303013324738	0.00294022813612127
K16898	neg_2842	0.866666674613953	0.0011735379121256
K08714	neg_2851	-0.818181812763214	0.00381492051076338
K11754	neg_2851	-0.842424213886261	0.00222003275351312
K00100	neg_2851	0.842424213886261	0.00222003275351312
K00297	neg_2851	-0.818181812763214	0.00381492051076338
K00765	neg_2851	-0.830303013324738	0.00294022813612127
K06179	neg_2851	-0.818181812763214	0.00381492051076338
K07454	neg_2851	-0.890909075737	0.000542144516154419
K06871	neg_2851	-0.878787875175476	0.000813862205061078
K00848	neg_2851	-0.830303013324738	0.00294022813612127
K00057	neg_2851	-0.939393937587738	5.48405364009241e-05
K01649	neg_2851	-0.818181812763214	0.00381492051076338
K17329	neg_286	-0.860478162765503	0.00139610202996154
K10237	neg_286	-0.813785552978516	0.00417382592013071
K02461	neg_286	-0.935483872890472	7.00850078045878e-05
K03651	neg_286	0.83790922164917	0.00247136195299369
K12072	neg_286	-0.800000011920929	0.00545599878335024
K02665	neg_286	-0.845363914966583	0.00206666064770777
K21217	neg_286	-0.845363914966583	0.00206666064770777
K19157	neg_286	0.925451993942261	0.000123404671922511
K16014	neg_286	0.845161318778992	0.00207697732308088
K06145	neg_286	0.81915009021759	0.00373894966455346
K03414	neg_286	-0.845363914966583	0.00206666064770777
K05802	neg_286	-0.900500416755676	0.000379701199800131
K10942	neg_286	-0.845363914966583	0.00206666064770777
K06311	neg_286	-0.865548312664032	0.00121169851367053
K02919	neg_286	-0.806643962860107	0.00480744414521128
K11933	neg_2886	-0.80374151468277	0.00508357521208702
K17329	neg_2886	-0.808135211467743	0.00466981917809761
K02461	neg_2886	-0.894186735153198	0.000481835628326488
K03651	neg_2886	0.842424213886261	0.00222003275351312
K02665	neg_2886	-0.819346487522125	0.00372367376291516
K05830	neg_2886	-0.818181812763214	0.00381492051076338
K21217	neg_2886	-0.846658051013947	0.00200163182665913
K06926	neg_2886	0.830303013324738	0.00294022813612127
K19157	neg_2886	0.939393937587738	5.48405364009241e-05
K06145	neg_2886	0.806060612201691	0.0048620605246823
K03414	neg_2886	-0.846658051013947	0.00200163182665913
K05802	neg_2886	-0.898646354675293	0.000407860267078952
K10942	neg_2886	-0.846658051013947	0.00200163182665913
K06311	neg_2886	-0.83890962600708	0.00241398974898654
K02919	neg_2886	-0.866666674613953	0.0011735379121256
K02461	neg_2892	0.806643962860107	0.00480744414521128
K00588	neg_2892	0.828283190727234	0.00307477558489877
K09512	neg_2892	-0.846925735473633	0.0019883679465349
K11933	neg_2932	-0.816012322902679	0.0039891464803441
K10237	neg_2932	-0.808135211467743	0.00466981917809761
K02461	neg_2932	-0.875427544116974	0.000904110124716251
K21217	neg_2932	-0.846658051013947	0.00200163182665913
K19157	neg_2932	0.903030276298523	0.000343612565232743
K03414	neg_2932	-0.887625336647034	0.000607926148504134
K05802	neg_2932	-0.911576509475708	0.000240107073119944
K10942	neg_2932	-0.887625336647034	0.000607926148504134
K06311	neg_2932	-0.911858320236206	0.000237143587637378
K02919	neg_2932	-0.854545474052429	0.00163680247839526
K04565	neg_2965	0.808514356613159	0.00463528246178302
K07139	neg_2965	0.802435338497162	0.00521145970824932
K05787	neg_2965	0.875383973121643	0.00090532610126548
K20452	neg_2965	-0.972349107265472	2.47360780414319e-06
K18298	neg_2965	-0.857146799564362	0.0015278405327328
K03225	neg_2972	-0.842424213886261	0.00222003275351312
K18692	neg_2972	-0.818181812763214	0.00381492051076338
K06871	neg_2973	-0.866666674613953	0.0011735379121256
K10907	neg_302	-0.939393937587738	5.48405364009241e-05
K00931	neg_302	-0.903030276298523	0.000343612565232743
K01814	neg_302	-0.939393937587738	5.48405364009241e-05
K12072	neg_302	0.831656157970428	0.00285249465359505
K09815	neg_302	-0.818181812763214	0.00381492051076338
K00013	neg_302	-0.830303013324738	0.00294022813612127
K07121	neg_302	0.818181812763214	0.00381492051076338
K18348	neg_302	-0.806060612201691	0.0048620605246823
K02778	neg_302	0.854545474052429	0.00163680247839526
K02501	neg_302	-0.806060612201691	0.0048620605246823
K00887	neg_302	0.806060612201691	0.0048620605246823
K03407	neg_302	0.927272737026215	0.000112034447641074
K00009	neg_302	-0.842424213886261	0.00222003275351312
K01649	neg_302	-0.806060612201691	0.0048620605246823
K01661	neg_302	0.854545474052429	0.00163680247839526
K17329	neg_3064	-0.859855890274048	0.00142005806532719
K02461	neg_3064	-0.919198930263519	0.00016900592052238
K03651	neg_3064	0.866666674613953	0.0011735379121256
K02665	neg_3064	-0.873969614505768	0.000945449010965937
K05830	neg_3064	-0.818181812763214	0.00381492051076338
K21217	neg_3064	-0.846658051013947	0.00200163182665913
K19157	neg_3064	0.963636338710785	7.32099466027591e-06
K06871	neg_3064	0.830303013324738	0.00294022813612127
K16014	neg_3064	0.81915009021759	0.00373894966455346
K06145	neg_3064	0.842424213886261	0.00222003275351312
K05802	neg_3064	-0.846925735473633	0.0019883679465349
K17329	neg_3088	-0.831202387809753	0.00288170263251697
K02461	neg_3088	-0.879905462265015	0.000785360184749173
K03651	neg_3088	0.877366662025452	0.000851188393096614
K02665	neg_3088	-0.8156378865242	0.00401978302331507
K05830	neg_3088	-0.828283190727234	0.00307477558489877
K21217	neg_3088	-0.8156378865242	0.00401978302331507
K19157	neg_3088	0.914179265499115	0.000213749081869885
K04748	neg_3088	-0.828283190727234	0.00307477558489877
K16014	neg_3088	0.82926344871521	0.00300893631849064
K06145	neg_3088	0.840554058551788	0.00232177976116144
K03414	neg_3088	-0.843286633491516	0.00217421422639408
K05802	neg_3088	-0.922830998897552	0.000141238827938484
K10942	neg_3088	-0.843286633491516	0.00217421422639408
K06311	neg_3088	-0.861575186252594	0.00135458546448364
K02919	neg_3088	-0.852824926376343	0.00171189540742711
K02493	neg_3092	0.818181812763214	0.00381492051076338
K02665	neg_3092	-0.846658051013947	0.00200163182665913
K21217	neg_3092	-0.819346487522125	0.00372367376291516
K03414	neg_3092	-0.805690705776215	0.00489692183645341
K05802	neg_3092	-0.808135211467743	0.00466981917809761
K10942	neg_3092	-0.805690705776215	0.00489692183645341
K04061	neg_3101	0.820672512054443	0.00362170350001234
K01729	neg_3101	-0.820672512054443	0.00362170350001234
K05787	neg_3101	-0.802435338497162	0.00521145970824932
K00588	neg_3101	0.818496406078339	0.00379011736651003
K18298	neg_3101	0.899700224399567	0.000391673296721073
K07139	neg_3158	0.806060612201691	0.0048620605246823
K05787	neg_3158	0.854545474052429	0.00163680247839526
K20452	neg_3158	-0.865095794200897	0.00122739260821847
K18298	neg_3158	-0.903030276298523	0.000343612565232743
K02461	neg_3198	-0.806643962860107	0.00480744414521128
K01729	neg_3198	0.842424213886261	0.00222003275351312
K04565	neg_3198	0.818181812763214	0.00381492051076338
K02665	neg_3198	-0.833002269268036	0.00276710271221536
K21217	neg_3198	-0.887625336647034	0.000607926148504134
K03643	neg_3198	0.830303013324738	0.00294022813612127
K19157	neg_3198	0.830303013324738	0.00294022813612127
K03414	neg_3198	-0.846658051013947	0.00200163182665913
K05851	neg_3198	-0.850415349006653	0.00182121334938934
K10942	neg_3198	-0.846658051013947	0.00200163182665913
K14575	neg_3198	0.83890962600708	0.00241398974898654
K09951	neg_3198	0.854545474052429	0.00163680247839526
K11754	neg_3252	-0.818181812763214	0.00381492051076338
K06167	neg_3252	-0.903030276298523	0.000343612565232743
K01729	neg_3252	-0.854545474052429	0.00163680247839526
K02852	neg_3252	-0.890909075737	0.000542144516154419
K05787	neg_3252	-0.806060612201691	0.0048620605246823
K00783	neg_3252	-0.818181812763214	0.00381492051076338
K14575	neg_3252	-0.832830607891083	0.00277788845123905
K09951	neg_3252	-0.806060612201691	0.0048620605246823
K12543	neg_3294	0.830303013324738	0.00294022813612127
K01060	neg_3351	0.903030276298523	0.000343612565232743
K11933	neg_3351	-0.877366662025452	0.000851188393096614
K10237	neg_3351	-0.846925735473633	0.0019883679465349
K04565	neg_3351	0.830303013324738	0.00294022813612127
K07031	neg_3351	-0.806060612201691	0.0048620605246823
K12231	neg_3351	-0.833002269268036	0.00276710271221536
K18537	neg_3351	-0.951515138149261	2.27985739738035e-05
K18692	neg_3351	-0.842424213886261	0.00222003275351312
K10578	neg_3351	-0.819346487522125	0.00372367376291516
K02491	neg_3351	-0.852824926376343	0.00171189540742711
K03724	neg_3351	0.842424213886261	0.00222003275351312
K14571	neg_3355	-0.814593434333801	0.00410613103846336
K01483	neg_3355	-0.806060612201691	0.0048620605246823
K02521	neg_3355	-0.830303013324738	0.00294022813612127
K18537	neg_3355	-0.818181812763214	0.00381492051076338
K10578	neg_3355	-0.839830160140991	0.00236205253090405
K19784	neg_3355	-0.816012322902679	0.0039891464803441
K02919	neg_3355	-0.854545474052429	0.00163680247839526
K18198	neg_3360	-0.850415349006653	0.00182121334938934
K17329	neg_3360	-0.900500416755676	0.000379701199800131
K10237	neg_3360	-0.867148578166962	0.00115736689574253
K02461	neg_3360	-0.922580659389496	0.000143036279588005
K03651	neg_3360	0.90043979883194	0.000380598613888061
K12072	neg_3360	-0.83225804567337	0.00281408229788882
K02665	neg_3360	-0.845363914966583	0.00206666064770777
K05830	neg_3360	-0.825403153896332	0.00327420560319291
K21217	neg_3360	-0.845363914966583	0.00206666064770777
K19157	neg_3360	0.875427544116974	0.000904110124716251
K04748	neg_3360	-0.869174480438232	0.00109115185763287
K16014	neg_3360	0.83225804567337	0.00281408229788882
K06145	neg_3360	0.894186735153198	0.000481835628326488
K03414	neg_3360	-0.845363914966583	0.00206666064770777
K05802	neg_3360	-0.860478162765503	0.00139610202996154
K10942	neg_3360	-0.845363914966583	0.00206666064770777
K06311	neg_3360	-0.859276235103607	0.00144264047431664
K11933	neg_3377	-0.852824926376343	0.00171189540742711
K00817	neg_3377	0.818181812763214	0.00381492051076338
K01524	neg_3377	0.842424213886261	0.00222003275351312
K03414	neg_3377	-0.819346487522125	0.00372367376291516
K05802	neg_3377	-0.885716199874878	0.000648751005291714
K05851	neg_3377	-0.83790922164917	0.00247136195299369
K10942	neg_3377	-0.819346487522125	0.00372367376291516
K14051	neg_3377	0.839830160140991	0.00236205253090405
K08714	neg_3414	-0.963636338710785	7.32099466027591e-06
K11933	neg_3414	0.865095794200897	0.00122739260821847
K04075	neg_3414	-0.854545474052429	0.00163680247839526
K03470	neg_3414	-0.818181812763214	0.00381492051076338
K07391	neg_3414	-0.830303013324738	0.00294022813612127
K10237	neg_3414	0.846925735473633	0.0019883679465349
K03524	neg_3414	-0.854545474052429	0.00163680247839526
K01714	neg_3414	-0.878787875175476	0.000813862205061078
K04096	neg_3414	-0.806060612201691	0.0048620605246823
K04069	neg_3414	-0.806060612201691	0.0048620605246823
K07166	neg_3414	-0.878787875175476	0.000813862205061078
K06167	neg_3414	-0.806060612201691	0.0048620605246823
K04565	neg_3414	-0.818181812763214	0.00381492051076338
K13798	neg_3414	0.854545474052429	0.00163680247839526
K07031	neg_3414	0.854545474052429	0.00163680247839526
K07139	neg_3414	-0.878787875175476	0.000813862205061078
K05787	neg_3414	-0.866666674613953	0.0011735379121256
K03607	neg_3414	0.846658051013947	0.00200163182665913
K12231	neg_3414	0.873969614505768	0.000945449010965937
K00765	neg_3414	-0.806060612201691	0.0048620605246823
K06179	neg_3414	-0.866666674613953	0.0011735379121256
K00783	neg_3414	-0.842424213886261	0.00222003275351312
K01483	neg_3414	0.842424213886261	0.00222003275351312
K00014	neg_3414	-0.806060612201691	0.0048620605246823
K10578	neg_3414	0.833002269268036	0.00276710271221536
K14051	neg_3414	-0.873969614505768	0.000945449010965937
K03724	neg_3414	-0.830303013324738	0.00294022813612127
K07574	neg_3414	-0.854545474052429	0.00163680247839526
K00057	neg_3414	-0.842424213886261	0.00222003275351312
K02461	neg_3422	0.83790922164917	0.00247136195299369
K02665	neg_3422	0.846658051013947	0.00200163182665913
K21217	neg_3422	0.873969614505768	0.000945449010965937
K19157	neg_3422	-0.927272737026215	0.000112034447641074
K16014	neg_3422	-0.931705057621002	8.75967112814457e-05
K03414	neg_3422	0.833002269268036	0.00276710271221536
K05802	neg_3422	0.859855890274048	0.00142005806532719
K10942	neg_3422	0.833002269268036	0.00276710271221536
K06311	neg_3422	0.863225877285004	0.00129381457010247
K18198	neg_344	-0.842424213886261	0.00222003275351312
K17329	neg_344	-0.872786045074463	0.000980007503875058
K03470	neg_344	0.842424213886261	0.00222003275351312
K10237	neg_344	-0.885716199874878	0.000648751005291714
K02461	neg_344	-0.956717252731323	1.45713471533249e-05
K07126	neg_344	0.806060612201691	0.0048620605246823
K06285	neg_344	-0.806060612201691	0.0048620605246823
K09815	neg_344	0.806060612201691	0.0048620605246823
K12543	neg_344	-0.878787875175476	0.000813862205061078
K02665	neg_344	-0.846658051013947	0.00200163182665913
K21217	neg_344	-0.873969614505768	0.000945449010965937
K19157	neg_344	0.818181812763214	0.00381492051076338
K00849	neg_344	0.842424213886261	0.00222003275351312
K06145	neg_344	0.806060612201691	0.0048620605246823
K03414	neg_344	-0.819346487522125	0.00372367376291516
K10942	neg_344	-0.819346487522125	0.00372367376291516
K06311	neg_344	-0.826751530170441	0.00317971472634282
K00057	neg_344	0.806060612201691	0.0048620605246823
K20452	neg_3440	-0.950991809368134	2.37837330223645e-05
K18298	neg_3440	-0.818181812763214	0.00381492051076338
K02491	neg_3440	-0.80374151468277	0.00508357521208702
K00845	neg_3458	0.830303013324738	0.00294022813612127
K03769	neg_3458	0.806060612201691	0.0048620605246823
K12072	neg_3458	-0.90043979883194	0.000380598613888061
K09815	neg_3458	0.890909075737	0.000542144516154419
K07121	neg_3458	-0.842424213886261	0.00222003275351312
K21217	neg_3458	-0.819346487522125	0.00372367376291516
K16014	neg_3458	0.869174480438232	0.00109115185763287
K03414	neg_3458	-0.833002269268036	0.00276710271221536
K10942	neg_3458	-0.833002269268036	0.00276710271221536
K02461	neg_3487	0.844162285327911	0.00212839548320387
K02665	neg_3487	0.826174378395081	0.00321991677364641
K17329	neg_3496	-0.859855890274048	0.00142005806532719
K02461	neg_3496	-0.856668412685394	0.00154747182074688
K03651	neg_3496	0.842424213886261	0.00222003275351312
K02665	neg_3496	-0.833002269268036	0.00276710271221536
K19157	neg_3496	0.878787875175476	0.000813862205061078
K04748	neg_3496	-0.818181812763214	0.00381492051076338
K06145	neg_3496	0.806060612201691	0.0048620605246823
K05802	neg_3496	-0.898646354675293	0.000407860267078952
K06311	neg_3496	-0.826751530170441	0.00317971472634282
K02919	neg_3496	-0.806060612201691	0.0048620605246823
K18198	neg_3498	0.830303013324738	0.00294022813612127
K07672	neg_3498	-0.850415349006653	0.00182121334938934
K17329	neg_3498	0.821065366268158	0.00359188206024896
K01261	neg_3498	-0.903030276298523	0.000343612565232743
K00100	neg_3498	0.878787875175476	0.000813862205061078
K04061	neg_3498	0.830303013324738	0.00294022813612127
K03406	neg_3498	0.818181812763214	0.00381492051076338
K01729	neg_3498	-0.806060612201691	0.0048620605246823
K03651	neg_3498	-0.939393937587738	5.48405364009241e-05
K05830	neg_3498	0.818181812763214	0.00381492051076338
K07454	neg_3498	-0.806060612201691	0.0048620605246823
K04748	neg_3498	0.927272737026215	0.000112034447641074
K02744	neg_3498	0.830303013324738	0.00294022813612127
K01909	neg_3498	0.903030276298523	0.000343612565232743
K06145	neg_3498	-0.903030276298523	0.000343612565232743
K05964	neg_3498	0.854545474052429	0.00163680247839526
K11933	neg_3504	-0.826086938381195	0.00322603919015818
K17329	neg_3504	-0.831202387809753	0.00288170263251697
K02461	neg_3504	-0.879905462265015	0.000785360184749173
K03651	neg_3504	0.840554058551788	0.00232177976116144
K02665	neg_3504	-0.8156378865242	0.00401978302331507
K21217	neg_3504	-0.8156378865242	0.00401978302331507
K06926	neg_3504	0.80374151468277	0.00508357521208702
K19157	neg_3504	0.901908397674561	0.000359290276283897
K06145	neg_3504	0.80374151468277	0.00508357521208702
K03414	neg_3504	-0.843286633491516	0.00217421422639408
K05802	neg_3504	-0.922830998897552	0.000141238827938484
K10942	neg_3504	-0.843286633491516	0.00217421422639408
K06311	neg_3504	-0.861575186252594	0.00135458546448364
K02919	neg_3504	-0.865095794200897	0.00122739260821847
K18198	neg_3529	0.830303013324738	0.00294022813612127
K02461	neg_3529	0.812897026538849	0.00424919679863534
K02665	neg_3529	0.873969614505768	0.000945449010965937
K21217	neg_3529	0.846658051013947	0.00200163182665913
K16014	neg_3529	-0.806643962860107	0.00480744414521128
K05802	neg_3529	0.808135211467743	0.00466981917809761
K06311	neg_3529	0.851067781448364	0.00179112909994994
K20525	neg_3529	-0.818181812763214	0.00381492051076338
K02784	neg_3564	-0.806060612201691	0.0048620605246823
K03501	neg_3564	-0.818181812763214	0.00381492051076338
K01809	neg_3564	-0.878787875175476	0.000813862205061078
K03218	neg_3564	-0.842424213886261	0.00222003275351312
K07493	neg_3566	0.862921476364136	0.00130486922968087
K20452	neg_3586	-0.877366662025452	0.000851188393096614
K20452	neg_3587	0.80374151468277	0.00508357521208702
K11933	neg_3592	-0.816012322902679	0.0039891464803441
K10237	neg_3592	-0.833995580673218	0.00270528265085312
K02461	neg_3592	-0.881680607795715	0.000741594922435862
K03651	neg_3592	0.806060612201691	0.0048620605246823
K21217	neg_3592	-0.805690705776215	0.00489692183645341
K19157	neg_3592	0.842424213886261	0.00222003275351312
K18537	neg_3592	-0.818181812763214	0.00381492051076338
K16014	neg_3592	0.844162285327911	0.00212839548320387
K03414	neg_3592	-0.873969614505768	0.000945449010965937
K05802	neg_3592	-0.924506723880768	0.000129632545059266
K10942	neg_3592	-0.873969614505768	0.000945449010965937
K06311	neg_3592	-0.930095493793488	9.59607762942571e-05
K02919	neg_3592	-0.842424213886261	0.00222003275351312
K17329	neg_3608	-0.831202387809753	0.00288170263251697
K02461	neg_3608	-0.879905462265015	0.000785360184749173
K03651	neg_3608	0.877366662025452	0.000851188393096614
K02665	neg_3608	-0.8156378865242	0.00401978302331507
K05830	neg_3608	-0.828283190727234	0.00307477558489877
K21217	neg_3608	-0.8156378865242	0.00401978302331507
K19157	neg_3608	0.914179265499115	0.000213749081869885
K04748	neg_3608	-0.828283190727234	0.00307477558489877
K16014	neg_3608	0.82926344871521	0.00300893631849064
K06145	neg_3608	0.840554058551788	0.00232177976116144
K03414	neg_3608	-0.843286633491516	0.00217421422639408
K05802	neg_3608	-0.922830998897552	0.000141238827938484
K10942	neg_3608	-0.843286633491516	0.00217421422639408
K06311	neg_3608	-0.861575186252594	0.00135458546448364
K02919	neg_3608	-0.852824926376343	0.00171189540742711
K18198	neg_3609	-0.842424213886261	0.00222003275351312
K11933	neg_3609	-0.901908397674561	0.000359290276283897
K17329	neg_3609	-0.833995580673218	0.00270528265085312
K10237	neg_3609	-0.846925735473633	0.0019883679465349
K04061	neg_3609	-0.830303013324738	0.00294022813612127
K04096	neg_3609	0.854545474052429	0.00163680247839526
K02461	neg_3609	-0.844162285327911	0.00212839548320387
K07126	neg_3609	0.806060612201691	0.0048620605246823
K03651	neg_3609	0.830303013324738	0.00294022813612127
K04565	neg_3609	0.830303013324738	0.00294022813612127
K06926	neg_3609	0.842424213886261	0.00222003275351312
K04748	neg_3609	-0.806060612201691	0.0048620605246823
K18537	neg_3609	-0.806060612201691	0.0048620605246823
K06145	neg_3609	0.806060612201691	0.0048620605246823
K03414	neg_3609	-0.860313832759857	0.00140239962667921
K05802	neg_3609	-0.898646354675293	0.000407860267078952
K05851	neg_3609	-0.806643962860107	0.00480744414521128
K10942	neg_3609	-0.860313832759857	0.00140239962667921
K06311	neg_3609	-0.881463050842285	0.000746860533753502
K02919	neg_3609	-0.866666674613953	0.0011735379121256
K11933	neg_3637	-0.80374151468277	0.00508357521208702
K17329	neg_3637	-0.808135211467743	0.00466981917809761
K02461	neg_3637	-0.894186735153198	0.000481835628326488
K03651	neg_3637	0.842424213886261	0.00222003275351312
K02665	neg_3637	-0.819346487522125	0.00372367376291516
K05830	neg_3637	-0.818181812763214	0.00381492051076338
K21217	neg_3637	-0.846658051013947	0.00200163182665913
K06926	neg_3637	0.830303013324738	0.00294022813612127
K19157	neg_3637	0.939393937587738	5.48405364009241e-05
K06145	neg_3637	0.806060612201691	0.0048620605246823
K03414	neg_3637	-0.846658051013947	0.00200163182665913
K05802	neg_3637	-0.898646354675293	0.000407860267078952
K10942	neg_3637	-0.846658051013947	0.00200163182665913
K06311	neg_3637	-0.83890962600708	0.00241398974898654
K02919	neg_3637	-0.866666674613953	0.0011735379121256
K11933	neg_3653	-0.865095794200897	0.00122739260821847
K02461	neg_3653	-0.856668412685394	0.00154747182074688
K03651	neg_3653	0.806060612201691	0.0048620605246823
K19157	neg_3653	0.854545474052429	0.00163680247839526
K03414	neg_3653	-0.860313832759857	0.00140239962667921
K05802	neg_3653	-0.937436878681183	6.21251750798635e-05
K10942	neg_3653	-0.860313832759857	0.00140239962667921
K06311	neg_3653	-0.887542068958282	0.000609666476501403
K02919	neg_3653	-0.890909075737	0.000542144516154419
K00640	neg_3656	-0.818181812763214	0.00381492051076338
K03827	neg_3656	0.854545474052429	0.00163680247839526
K03225	neg_3656	0.806060612201691	0.0048620605246823
K07031	neg_3656	0.866666674613953	0.0011735379121256
K07039	neg_3656	-0.806060612201691	0.0048620605246823
K21029	neg_3656	0.806060612201691	0.0048620605246823
K07396	neg_3656	0.806060612201691	0.0048620605246823
K06907	neg_3656	0.842424213886261	0.00222003275351312
K20885	neg_3656	-0.818181812763214	0.00381492051076338
K04085	neg_3656	0.854545474052429	0.00163680247839526
K09512	neg_3656	-0.885716199874878	0.000648751005291714
K07707	neg_3656	0.854545474052429	0.00163680247839526
K11933	neg_3666	-0.852824926376343	0.00171189540742711
K07099	neg_3666	0.842424213886261	0.00222003275351312
K07391	neg_3666	0.818181812763214	0.00381492051076338
K04096	neg_3666	0.878787875175476	0.000813862205061078
K04069	neg_3666	0.903030276298523	0.000343612565232743
K00817	neg_3666	0.939393937587738	5.48405364009241e-05
K00852	neg_3666	0.878787875175476	0.000813862205061078
K19411	neg_3666	0.890909075737	0.000542144516154419
K00800	neg_3666	0.806060612201691	0.0048620605246823
K06285	neg_3666	-0.842424213886261	0.00222003275351312
K04565	neg_3666	0.830303013324738	0.00294022813612127
K19334	neg_3666	0.818181812763214	0.00381492051076338
K03573	neg_3666	0.866666674613953	0.0011735379121256
K03643	neg_3666	0.842424213886261	0.00222003275351312
K01295	neg_3666	0.818181812763214	0.00381492051076338
K00849	neg_3666	0.830303013324738	0.00294022813612127
K13014	neg_3666	0.806060612201691	0.0048620605246823
K04517	neg_3666	0.830303013324738	0.00294022813612127
K01524	neg_3666	0.806060612201691	0.0048620605246823
K07720	neg_3666	0.842424213886261	0.00222003275351312
K03414	neg_3666	-0.860313832759857	0.00140239962667921
K07043	neg_3666	0.842424213886261	0.00222003275351312
K05851	neg_3666	-0.906692802906036	0.000295911879524491
K10942	neg_3666	-0.860313832759857	0.00140239962667921
K03724	neg_3666	0.806060612201691	0.0048620605246823
K16898	neg_3666	0.806060612201691	0.0048620605246823
K11933	neg_3689	-0.914179265499115	0.000213749081869885
K17329	neg_3689	-0.846925735473633	0.0019883679465349
K10237	neg_3689	-0.872786045074463	0.000980007503875058
K04096	neg_3689	0.854545474052429	0.00163680247839526
K02461	neg_3689	-0.881680607795715	0.000741594922435862
K06285	neg_3689	-0.830303013324738	0.00294022813612127
K02458	neg_3689	-0.852824926376343	0.00171189540742711
K04565	neg_3689	0.854545474052429	0.00163680247839526
K18537	neg_3689	-0.890909075737	0.000542144516154419
K03414	neg_3689	-0.846658051013947	0.00200163182665913
K05802	neg_3689	-0.859855890274048	0.00142005806532719
K05851	neg_3689	-0.81915009021759	0.00373894966455346
K10942	neg_3689	-0.846658051013947	0.00200163182665913
K09512	neg_3689	0.808135211467743	0.00466981917809761
K06311	neg_3689	-0.881463050842285	0.000746860533753502
K02461	neg_3705	0.83790922164917	0.00247136195299369
K02665	neg_3705	0.846658051013947	0.00200163182665913
K21217	neg_3705	0.873969614505768	0.000945449010965937
K19157	neg_3705	-0.890909075737	0.000542144516154419
K06871	neg_3705	-0.842424213886261	0.00222003275351312
K16014	neg_3705	-0.869174480438232	0.00109115185763287
K03414	neg_3705	0.833002269268036	0.00276710271221536
K05802	neg_3705	0.859855890274048	0.00142005806532719
K10942	neg_3705	0.833002269268036	0.00276710271221536
K19157	neg_3723	-0.818181812763214	0.00381492051076338
K18298	neg_3723	0.830303013324738	0.00294022813612127
K00845	neg_3739	0.939393937587738	5.48405364009241e-05
K00640	neg_3739	0.878787875175476	0.000813862205061078
K07672	neg_3739	0.850415349006653	0.00182121334938934
K07099	neg_3739	0.854545474052429	0.00163680247839526
K03827	neg_3739	-0.975757598876953	1.46754063035104e-06
K10237	neg_3739	-0.846925735473633	0.0019883679465349
K00100	neg_3739	-0.830303013324738	0.00294022813612127
K01714	neg_3739	0.890909075737	0.000542144516154419
K04069	neg_3739	0.818181812763214	0.00381492051076338
K00852	neg_3739	0.830303013324738	0.00294022813612127
K10907	neg_3739	0.806060612201691	0.0048620605246823
K12072	neg_3739	-0.81915009021759	0.00373894966455346
K09815	neg_3739	0.854545474052429	0.00163680247839526
K07121	neg_3739	-0.866666674613953	0.0011735379121256
K07039	neg_3739	0.878787875175476	0.000813862205061078
K00949	neg_3739	0.806060612201691	0.0048620605246823
K13665	neg_3739	-0.818181812763214	0.00381492051076338
K07396	neg_3739	-0.963636338710785	7.32099466027591e-06
K12231	neg_3739	-0.833002269268036	0.00276710271221536
K04517	neg_3739	0.830303013324738	0.00294022813612127
K13611	neg_3739	-0.859855890274048	0.00142005806532719
K10953	neg_3739	0.885716199874878	0.000648751005291714
K10578	neg_3739	-0.819346487522125	0.00372367376291516
K07707	neg_3739	-0.806060612201691	0.0048620605246823
K03724	neg_3739	0.830303013324738	0.00294022813612127
K19784	neg_3739	-0.840554058551788	0.00232177976116144
K01661	neg_3739	-0.854545474052429	0.00163680247839526
K02493	neg_3759	0.852824926376343	0.00171189540742711
K02784	neg_3759	0.877366662025452	0.000851188393096614
K03769	neg_3759	0.926450133323669	0.000117071096429999
K17331	neg_3759	0.898584127426147	0.000408831129309783
K19334	neg_3759	0.816012322902679	0.0039891464803441
K13665	neg_3759	-0.828283190727234	0.00307477558489877
K05836	neg_3759	0.816012322902679	0.0039891464803441
K01409	neg_3759	0.840554058551788	0.00232177976116144
K20525	neg_3759	0.852824926376343	0.00171189540742711
K01159	neg_3762	0.806060612201691	0.0048620605246823
K01729	neg_3762	0.806060612201691	0.0048620605246823
K07139	neg_3762	0.806060612201691	0.0048620605246823
K05787	neg_3762	0.878787875175476	0.000813862205061078
K20452	neg_3762	-0.926450133323669	0.000117071096429999
K11068	neg_3762	0.806060612201691	0.0048620605246823
K14575	neg_3762	0.83890962600708	0.00241398974898654
K18298	neg_3762	-0.915151536464691	0.000204472206099204
K09951	neg_3762	0.806060612201691	0.0048620605246823
K08714	neg_3785	0.927272737026215	0.000112034447641074
K12543	neg_3785	-0.818181812763214	0.00381492051076338
K07031	neg_3785	-0.806060612201691	0.0048620605246823
K07139	neg_3785	0.890909075737	0.000542144516154419
K05787	neg_3785	0.890909075737	0.000542144516154419
K00588	neg_3785	-0.852824926376343	0.00171189540742711
K06926	neg_3785	0.830303013324738	0.00294022813612127
K11933	neg_3807	-0.877366662025452	0.000851188393096614
K10237	neg_3807	-0.808135211467743	0.00466981917809761
K02458	neg_3807	-0.889637529850006	0.000566964581027118
K07031	neg_3807	-0.842424213886261	0.00222003275351312
K12231	neg_3807	-0.833002269268036	0.00276710271221536
K02521	neg_3807	-0.842424213886261	0.00222003275351312
K18537	neg_3807	-0.987878799438477	9.30742460880651e-08
K10578	neg_3807	-0.819346487522125	0.00372367376291516
K09512	neg_3807	0.821065366268158	0.00359188206024896
K02491	neg_3807	-0.816012322902679	0.0039891464803441
K07707	neg_3807	-0.818181812763214	0.00381492051076338
K02919	neg_3807	-0.806060612201691	0.0048620605246823
K18198	neg_3820	-0.806060612201691	0.0048620605246823
K11933	neg_3820	-0.828283190727234	0.00307477558489877
K17329	neg_3820	-0.872786045074463	0.000980007503875058
K02461	neg_3820	-0.831656157970428	0.00285249465359505
K02745	neg_3820	-0.818181812763214	0.00381492051076338
K03651	neg_3820	0.903030276298523	0.000343612565232743
K05830	neg_3820	-0.806060612201691	0.0048620605246823
K19157	neg_3820	0.818181812763214	0.00381492051076338
K04748	neg_3820	-0.903030276298523	0.000343612565232743
K18692	neg_3820	-0.818181812763214	0.00381492051076338
K06145	neg_3820	0.866666674613953	0.0011735379121256
K03414	neg_3820	-0.819346487522125	0.00372367376291516
K05802	neg_3820	-0.885716199874878	0.000648751005291714
K10942	neg_3820	-0.819346487522125	0.00372367376291516
K06311	neg_3820	-0.826751530170441	0.00317971472634282
K03724	neg_3820	0.806060612201691	0.0048620605246823
K02919	neg_3820	-0.818181812763214	0.00381492051076338
K08714	neg_3852	0.854545474052429	0.00163680247839526
K00640	neg_3852	0.806060612201691	0.0048620605246823
K05946	neg_3852	0.939393937587738	5.48405364009241e-05
K11933	neg_3852	-0.877366662025452	0.000851188393096614
K07099	neg_3852	0.903030276298523	0.000343612565232743
K04075	neg_3852	0.903030276298523	0.000343612565232743
K01159	neg_3852	0.806060612201691	0.0048620605246823
K03470	neg_3852	0.890909075737	0.000542144516154419
K07391	neg_3852	0.951515138149261	2.27985739738035e-05
K10237	neg_3852	-0.885716199874878	0.000648751005291714
K04061	neg_3852	-0.890909075737	0.000542144516154419
K03524	neg_3852	0.939393937587738	5.48405364009241e-05
K04096	neg_3852	0.951515138149261	2.27985739738035e-05
K04069	neg_3852	0.890909075737	0.000542144516154419
K07126	neg_3852	0.818181812763214	0.00381492051076338
K09779	neg_3852	0.927272737026215	0.000112034447641074
K07166	neg_3852	0.915151536464691	0.000204472206099204
K00852	neg_3852	0.830303013324738	0.00294022813612127
K19411	neg_3852	0.818181812763214	0.00381492051076338
K06167	neg_3852	0.842424213886261	0.00222003275351312
K00800	neg_3852	0.854545474052429	0.00163680247839526
K09761	neg_3852	0.890909075737	0.000542144516154419
K04565	neg_3852	0.939393937587738	5.48405364009241e-05
K13798	neg_3852	-0.830303013324738	0.00294022813612127
K07139	neg_3852	0.866666674613953	0.0011735379121256
K15599	neg_3852	-0.890909075737	0.000542144516154419
K05787	neg_3852	0.890909075737	0.000542144516154419
K03573	neg_3852	0.830303013324738	0.00294022813612127
K03607	neg_3852	-0.805690705776215	0.00489692183645341
K05985	neg_3852	0.854545474052429	0.00163680247839526
K06926	neg_3852	0.890909075737	0.000542144516154419
K00783	neg_3852	0.878787875175476	0.000813862205061078
K09777	neg_3852	0.878787875175476	0.000813862205061078
K00859	neg_3852	0.915151536464691	0.000204472206099204
K01295	neg_3852	0.866666674613953	0.0011735379121256
K03101	neg_3852	0.830303013324738	0.00294022813612127
K01483	neg_3852	-0.842424213886261	0.00222003275351312
K00849	neg_3852	0.903030276298523	0.000343612565232743
K04517	neg_3852	0.878787875175476	0.000813862205061078
K11068	neg_3852	0.806060612201691	0.0048620605246823
K00969	neg_3852	0.866666674613953	0.0011735379121256
K07720	neg_3852	0.903030276298523	0.000343612565232743
K10578	neg_3852	-0.846658051013947	0.00200163182665913
K07043	neg_3852	0.818181812763214	0.00381492051076338
K05970	neg_3852	0.806060612201691	0.0048620605246823
K05851	neg_3852	-0.831656157970428	0.00285249465359505
K04486	neg_3852	0.806060612201691	0.0048620605246823
K01736	neg_3852	0.890909075737	0.000542144516154419
K07053	neg_3852	0.890909075737	0.000542144516154419
K09775	neg_3852	0.866666674613953	0.0011735379121256
K03724	neg_3852	0.806060612201691	0.0048620605246823
K00883	neg_3852	0.842424213886261	0.00222003275351312
K08714	neg_3889	-0.830303013324738	0.00294022813612127
K06167	neg_3889	-0.818181812763214	0.00381492051076338
K02852	neg_3889	-0.878787875175476	0.000813862205061078
K07139	neg_3889	-0.818181812763214	0.00381492051076338
K05787	neg_3889	-0.818181812763214	0.00381492051076338
K00588	neg_3889	0.840554058551788	0.00232177976116144
K06926	neg_3889	-0.854545474052429	0.00163680247839526
K14051	neg_3889	-0.826174378395081	0.00321991677364641
K11933	neg_392	-0.865095794200897	0.00122739260821847
K02461	neg_392	-0.856668412685394	0.00154747182074688
K03651	neg_392	0.806060612201691	0.0048620605246823
K19157	neg_392	0.854545474052429	0.00163680247839526
K03414	neg_392	-0.860313832759857	0.00140239962667921
K05802	neg_392	-0.937436878681183	6.21251750798635e-05
K10942	neg_392	-0.860313832759857	0.00140239962667921
K06311	neg_392	-0.887542068958282	0.000609666476501403
K02919	neg_392	-0.890909075737	0.000542144516154419
K11933	neg_3940	-0.914179265499115	0.000213749081869885
K17329	neg_3940	-0.808135211467743	0.00466981917809761
K10237	neg_3940	-0.911576509475708	0.000240107073119944
K04061	neg_3940	-0.806060612201691	0.0048620605246823
K04096	neg_3940	0.854545474052429	0.00163680247839526
K02461	neg_3940	-0.894186735153198	0.000481835628326488
K03651	neg_3940	0.818181812763214	0.00381492051076338
K02458	neg_3940	-0.816012322902679	0.0039891464803441
K04565	neg_3940	0.866666674613953	0.0011735379121256
K21217	neg_3940	-0.846658051013947	0.00200163182665913
K06926	neg_3940	0.818181812763214	0.00381492051076338
K19157	neg_3940	0.854545474052429	0.00163680247839526
K18537	neg_3940	-0.842424213886261	0.00222003275351312
K03414	neg_3940	-0.887625336647034	0.000607926148504134
K05802	neg_3940	-0.872786045074463	0.000980007503875058
K05851	neg_3940	-0.856668412685394	0.00154747182074688
K10942	neg_3940	-0.887625336647034	0.000607926148504134
K06311	neg_3940	-0.851067781448364	0.00179112909994994
K03724	neg_3940	0.830303013324738	0.00294022813612127
K02919	neg_3940	-0.878787875175476	0.000813862205061078
K02784	neg_396	0.842424213886261	0.00222003275351312
K01060	neg_410	0.878787875175476	0.000813862205061078
K17329	neg_410	-0.821065366268158	0.00359188206024896
K03412	neg_410	-0.987878799438477	9.30742460880651e-08
K00931	neg_410	0.842424213886261	0.00222003275351312
K08688	neg_410	0.878787875175476	0.000813862205061078
K07454	neg_410	0.842424213886261	0.00222003275351312
K00887	neg_410	-0.951515138149261	2.27985739738035e-05
K14051	neg_410	0.846658051013947	0.00200163182665913
K08302	neg_410	0.963636338710785	7.32099466027591e-06
K00575	neg_410	-0.806060612201691	0.0048620605246823
K00009	neg_410	0.915151536464691	0.000204472206099204
K08714	neg_412	0.866666674613953	0.0011735379121256
K02461	neg_412	-0.881680607795715	0.000741594922435862
K02852	neg_412	0.830303013324738	0.00294022813612127
K05830	neg_412	-0.830303013324738	0.00294022813612127
K07139	neg_412	0.806060612201691	0.0048620605246823
K05787	neg_412	0.818181812763214	0.00381492051076338
K00588	neg_412	-0.852824926376343	0.00171189540742711
K06926	neg_412	0.866666674613953	0.0011735379121256
K19157	neg_412	0.854545474052429	0.00163680247839526
K06871	neg_412	0.806060612201691	0.0048620605246823
K00057	neg_412	0.842424213886261	0.00222003275351312
K14051	neg_416	0.873969614505768	0.000945449010965937
K11933	neg_420	-0.80374151468277	0.00508357521208702
K02461	neg_420	-0.825403153896332	0.00327420560319291
K19157	neg_420	0.842424213886261	0.00222003275351312
K03414	neg_420	-0.860313832759857	0.00140239962667921
K05802	neg_420	-0.937436878681183	6.21251750798635e-05
K10942	neg_420	-0.860313832759857	0.00140239962667921
K06311	neg_420	-0.942253589630127	4.53587077142714e-05
K02919	neg_420	-0.842424213886261	0.00222003275351312
K11933	neg_430	-0.863354027271271	0.00128918106835152
K17329	neg_430	-0.831202387809753	0.00288170263251697
K02461	neg_430	-0.879905462265015	0.000785360184749173
K02665	neg_430	-0.8156378865242	0.00401978302331507
K21217	neg_430	-0.8156378865242	0.00401978302331507
K06926	neg_430	0.840554058551788	0.00232177976116144
K19157	neg_430	0.865095794200897	0.00122739260821847
K03414	neg_430	-0.843286633491516	0.00217421422639408
K05802	neg_430	-0.922830998897552	0.000141238827938484
K05851	neg_430	-0.816602885723114	0.00394116687238188
K10942	neg_430	-0.843286633491516	0.00217421422639408
K06311	neg_430	-0.818496406078339	0.00379011736651003
K14051	neg_430	0.801813542842865	0.00527313728075196
K02919	neg_430	-0.852824926376343	0.00171189540742711
K02493	neg_483	0.854545474052429	0.00163680247839526
K02784	neg_483	0.890909075737	0.000542144516154419
K17331	neg_483	0.839830160140991	0.00236205253090405
K09761	neg_483	0.830303013324738	0.00294022813612127
K03501	neg_483	0.915151536464691	0.000204472206099204
K01990	neg_483	0.830303013324738	0.00294022813612127
K00969	neg_483	0.854545474052429	0.00163680247839526
K00945	neg_483	0.806060612201691	0.0048620605246823
K03218	neg_483	0.818181812763214	0.00381492051076338
K05970	neg_483	0.806060612201691	0.0048620605246823
K00981	neg_483	0.806060612201691	0.0048620605246823
K01409	neg_483	0.830303013324738	0.00294022813612127
K00919	neg_483	0.890909075737	0.000542144516154419
K20525	neg_483	0.854545474052429	0.00163680247839526
K10237	neg_497	0.859855890274048	0.00142005806532719
K02461	neg_497	0.800390899181366	0.0054162086926719
K14571	neg_497	0.820672512054443	0.00362170350001234
K03607	neg_497	0.860313832759857	0.00140239962667921
K18537	neg_497	0.878787875175476	0.000813862205061078
K07707	neg_497	0.806060612201691	0.0048620605246823
K02919	neg_497	0.806060612201691	0.0048620605246823
K18198	neg_552	-0.854545474052429	0.00163680247839526
K07672	neg_552	0.812897026538849	0.00424919679863534
K17329	neg_552	-0.872786045074463	0.000980007503875058
K03406	neg_552	-0.806060612201691	0.0048620605246823
K02461	neg_552	-0.831656157970428	0.00285249465359505
K02745	neg_552	-0.806060612201691	0.0048620605246823
K03651	neg_552	0.915151536464691	0.000204472206099204
K00013	neg_552	0.806060612201691	0.0048620605246823
K05830	neg_552	-0.830303013324738	0.00294022813612127
K19157	neg_552	0.806060612201691	0.0048620605246823
K04748	neg_552	-0.915151536464691	0.000204472206099204
K16014	neg_552	0.806643962860107	0.00480744414521128
K06145	neg_552	0.890909075737	0.000542144516154419
K03414	neg_552	-0.819346487522125	0.00372367376291516
K05802	neg_552	-0.885716199874878	0.000648751005291714
K10942	neg_552	-0.819346487522125	0.00372367376291516
K06311	neg_552	-0.857146799564362	0.0015278405327328
K18198	neg_560	0.890909075737	0.000542144516154419
K07672	neg_560	-0.887933671474457	0.000601513437458179
K03340	neg_560	-0.927272737026215	0.000112034447641074
K01159	neg_560	-0.830303013324738	0.00294022813612127
K01261	neg_560	-0.818181812763214	0.00381492051076338
K04061	neg_560	0.818181812763214	0.00381492051076338
K07126	neg_560	-0.854545474052429	0.00163680247839526
K19411	neg_560	-0.866666674613953	0.0011735379121256
K02784	neg_560	-0.830303013324738	0.00294022813612127
K17331	neg_560	-0.873969614505768	0.000945449010965937
K09761	neg_560	-0.830303013324738	0.00294022813612127
K19334	neg_560	-0.818181812763214	0.00381492051076338
K01684	neg_560	-0.915151536464691	0.000204472206099204
K03573	neg_560	-0.903030276298523	0.000343612565232743
K15520	neg_560	-0.866666674613953	0.0011735379121256
K05989	neg_560	-0.806060612201691	0.0048620605246823
K08314	neg_560	-0.806060612201691	0.0048620605246823
K01990	neg_560	-0.830303013324738	0.00294022813612127
K00969	neg_560	-0.818181812763214	0.00381492051076338
K20885	neg_560	-0.818181812763214	0.00381492051076338
K01809	neg_560	-0.866666674613953	0.0011735379121256
K00945	neg_560	-0.830303013324738	0.00294022813612127
K06145	neg_560	-0.806060612201691	0.0048620605246823
K05970	neg_560	-0.939393937587738	5.48405364009241e-05
K00230	neg_560	-0.806060612201691	0.0048620605246823
K08169	neg_560	0.806060612201691	0.0048620605246823
K01299	neg_560	0.842424213886261	0.00222003275351312
K02445	neg_560	-0.842424213886261	0.00222003275351312
K05964	neg_560	0.842424213886261	0.00222003275351312
K02566	neg_560	-0.842424213886261	0.00222003275351312
K18198	neg_580	0.842424213886261	0.00222003275351312
K02493	neg_580	-0.806060612201691	0.0048620605246823
K20525	neg_580	-0.890909075737	0.000542144516154419
K18198	neg_59	0.842424213886261	0.00222003275351312
K17329	neg_59	0.898646354675293	0.000407860267078952
K03827	neg_59	0.806060612201691	0.0048620605246823
K02461	neg_59	0.844162285327911	0.00212839548320387
K03651	neg_59	-0.854545474052429	0.00163680247839526
K09789	neg_59	-0.806060612201691	0.0048620605246823
K02665	neg_59	0.805690705776215	0.00489692183645341
K04748	neg_59	0.878787875175476	0.000813862205061078
K06145	neg_59	-0.854545474052429	0.00163680247839526
K05802	neg_59	0.859855890274048	0.00142005806532719
K09512	neg_59	-0.846925735473633	0.0019883679465349
K06311	neg_59	0.875383973121643	0.00090532610126548
K02461	neg_637	0.844162285327911	0.00212839548320387
K02665	neg_637	0.826174378395081	0.00321991677364641
K19157	neg_637	-0.866666674613953	0.0011735379121256
K06311	neg_637	0.826751530170441	0.00317971472634282
K00845	neg_64	0.830303013324738	0.00294022813612127
K18198	neg_64	-0.866666674613953	0.0011735379121256
K00640	neg_64	0.806060612201691	0.0048620605246823
K07672	neg_64	0.869174480438232	0.00109115185763287
K01060	neg_64	0.830303013324738	0.00294022813612127
K05946	neg_64	0.866666674613953	0.0011735379121256
K07099	neg_64	0.842424213886261	0.00222003275351312
K03827	neg_64	-0.830303013324738	0.00294022813612127
K10237	neg_64	-0.898646354675293	0.000407860267078952
K03406	neg_64	-0.830303013324738	0.00294022813612127
K04096	neg_64	0.806060612201691	0.0048620605246823
K04069	neg_64	0.818181812763214	0.00381492051076338
K02745	neg_64	-0.854545474052429	0.00163680247839526
K00852	neg_64	0.818181812763214	0.00381492051076338
K03651	neg_64	0.818181812763214	0.00381492051076338
K04565	neg_64	0.830303013324738	0.00294022813612127
K07396	neg_64	-0.830303013324738	0.00294022813612127
K15792	neg_64	0.842424213886261	0.00222003275351312
K16199	neg_64	0.818181812763214	0.00381492051076338
K00344	neg_64	0.818181812763214	0.00381492051076338
K04517	neg_64	0.806060612201691	0.0048620605246823
K04748	neg_64	-0.806060612201691	0.0048620605246823
K10578	neg_64	-0.805690705776215	0.00489692183645341
K06145	neg_64	0.854545474052429	0.00163680247839526
K03414	neg_64	-0.826174378395081	0.00321991677364641
K10942	neg_64	-0.826174378395081	0.00321991677364641
K03724	neg_64	0.830303013324738	0.00294022813612127
K11933	neg_675	0.852824926376343	0.00171189540742711
K09779	neg_675	-0.842424213886261	0.00222003275351312
K02458	neg_675	0.828283190727234	0.00307477558489877
K07031	neg_675	0.830303013324738	0.00294022813612127
K01295	neg_675	-0.818181812763214	0.00381492051076338
K01483	neg_675	0.854545474052429	0.00163680247839526
K18537	neg_675	0.842424213886261	0.00222003275351312
K07720	neg_675	-0.806060612201691	0.0048620605246823
K14051	neg_675	-0.826174378395081	0.00321991677364641
K07574	neg_675	-0.830303013324738	0.00294022813612127
K17329	neg_677	-0.821065366268158	0.00359188206024896
K02461	neg_677	-0.844162285327911	0.00212839548320387
K01814	neg_677	0.818181812763214	0.00381492051076338
K12072	neg_677	-0.925451993942261	0.000123404671922511
K09815	neg_677	0.890909075737	0.000542144516154419
K00013	neg_677	0.806060612201691	0.0048620605246823
K07121	neg_677	-0.818181812763214	0.00381492051076338
K02665	neg_677	-0.819346487522125	0.00372367376291516
K06871	neg_677	0.854545474052429	0.00163680247839526
K16014	neg_677	0.881680607795715	0.000741594922435862
K05802	neg_677	-0.808135211467743	0.00466981917809761
K00057	neg_677	0.818181812763214	0.00381492051076338
K01649	neg_677	0.842424213886261	0.00222003275351312
K19157	neg_681	-0.830303013324738	0.00294022813612127
K09951	neg_681	-0.866666674613953	0.0011735379121256
K05946	neg_685	0.866666674613953	0.0011735379121256
K01159	neg_685	0.830303013324738	0.00294022813612127
K04061	neg_685	-0.890909075737	0.000542144516154419
K01729	neg_685	0.818181812763214	0.00381492051076338
K09761	neg_685	0.866666674613953	0.0011735379121256
K04565	neg_685	0.842424213886261	0.00222003275351312
K07139	neg_685	0.842424213886261	0.00222003275351312
K05787	neg_685	0.927272737026215	0.000112034447641074
K20452	neg_685	-0.901908397674561	0.000359290276283897
K00969	neg_685	0.806060612201691	0.0048620605246823
K14575	neg_685	0.802435338497162	0.00521145970824932
K05964	neg_685	-0.890909075737	0.000542144516154419
K02665	neg_708	0.826174378395081	0.00321991677364641
K16014	neg_708	-0.90043979883194	0.000380598613888061
K06145	neg_708	-0.806060612201691	0.0048620605246823
K01060	neg_71	0.830303013324738	0.00294022813612127
K11933	neg_71	-0.865095794200897	0.00122739260821847
K10237	neg_71	-0.885716199874878	0.000648751005291714
K04096	neg_71	0.842424213886261	0.00222003275351312
K02461	neg_71	-0.800390899181366	0.0054162086926719
K04565	neg_71	0.866666674613953	0.0011735379121256
K03607	neg_71	-0.805690705776215	0.00489692183645341
K18537	neg_71	-0.903030276298523	0.000343612565232743
K06311	neg_71	-0.851067781448364	0.00179112909994994
K07707	neg_71	-0.806060612201691	0.0048620605246823
K11933	neg_726	-0.865095794200897	0.00122739260821847
K02461	neg_726	-0.856668412685394	0.00154747182074688
K03651	neg_726	0.806060612201691	0.0048620605246823
K19157	neg_726	0.854545474052429	0.00163680247839526
K03414	neg_726	-0.860313832759857	0.00140239962667921
K05802	neg_726	-0.937436878681183	6.21251750798635e-05
K10942	neg_726	-0.860313832759857	0.00140239962667921
[truncated: 299 more rows]
