# Supplementary material for: Multi-omics analyses reveal that the gut microbiome and its metabolites promote milk fat synthesis in Zhongdian yak cows
Source: PeerJ journal article supplement (doi:10.7717/peerj.14444), 2022-12-02
Supplement: neg_biomarker_Web_Report.zip [file treat1_H_L.vs.H_L_kegg_enrichment_share.xls]

KEGG_description	ID	pvalue	qvalue	fold_change	omics
