# Supplementary material for: Multi-omics analyses reveal that the gut microbiome and its metabolites promote milk fat synthesis in Zhongdian yak cows
Source: PeerJ journal article supplement (doi:10.7717/peerj.14444), 2022-12-02
Supplement: neg_biomarker_Web_Report.zip [file treat1_H_L.vs.H_L_module_1.xls]

genusName	metaName	CC
Brevinema	neg_1065	0.806060612201691
Candidatus_Sulfopaludibacter	neg_1065	0.842424213886261
Comamonas	neg_1065	-0.830303013324738
Candidatus_Electrothrix	neg_1065	0.818181812763214
Thermopetrobacter	neg_1065	0.830303013324738
Rubrivivax	neg_1065	-0.842424213886261
Litorimonas	neg_1116	0.806060612201691
Chloroflexus	neg_1116	0.842424213886261
Porticoccus	neg_1116	0.818181812763214
Parafilimonas	neg_1116	-0.866666674613953
Thermobifida	neg_112	-0.83790922164917
Litorimonas	neg_112	0.856668412685394
Haliscomenobacter	neg_112	0.881680607795715
Zhihengliuella	neg_112	-0.894186735153198
Lawsonella	neg_112	0.853004157543182
Rodentibacter	neg_112	0.806643962860107
Izhakiella	neg_112	0.853004157543182
Desulfocucumis	neg_112	-0.800390899181366
Porticoccus	neg_112	0.806643962860107
Succinimonas	neg_112	-0.881680607795715
Thermobifida	neg_1307	-0.842424213886261
Stappia	neg_1307	0.806060612201691
Litorimonas	neg_1307	0.830303013324738
Haliscomenobacter	neg_1307	0.806060612201691
Zhihengliuella	neg_1307	-0.830303013324738
Acetivibrio	neg_1307	-0.818181812763214
Harryflintia	neg_1307	0.806060612201691
Desulfocucumis	neg_1307	-0.866666674613953
Succinimonas	neg_1307	-0.806060612201691
Litorimonas	neg_1330	0.828283190727234
Zhihengliuella	neg_1330	-0.914179265499115
Lawsonella	neg_1330	0.80618816614151
Rodentibacter	neg_1330	0.865095794200897
Marivita	neg_1330	-0.816012322902679
Izhakiella	neg_1330	0.843112826347351
Porticoccus	neg_1330	0.80374151468277
Succinimonas	neg_1330	-0.816012322902679
Thermobifida	neg_1361	-0.830303013324738
Litorimonas	neg_1361	0.903030276298523
Brevinema	neg_1361	0.878787875175476
Chloroflexus	neg_1361	0.830303013324738
Candidatus_Tokpelaia	neg_1361	0.830303013324738
Haliscomenobacter	neg_1361	0.830303013324738
Zhihengliuella	neg_1361	-0.890909075737
Lawsonella	neg_1361	0.802435338497162
Acetivibrio	neg_1361	-0.830303013324738
Limnobacter	neg_1361	0.869304955005646
Lmd1virus	neg_1361	-0.881680607795715
Dolosicoccus	neg_1361	-0.818181812763214
Dactylococcopsis	neg_1361	-0.842424213886261
Porticoccus	neg_1361	0.806060612201691
Eah2virus	neg_1361	0.833002269268036
Lacinutrix	neg_1363	0.939393937587738
Thermobifida	neg_1382	-0.842424213886261
Stappia	neg_1382	0.854545474052429
Caloramator	neg_1382	0.818181812763214
Anaerotignum	neg_1382	-0.854545474052429
Erythrobacter	neg_1382	0.830303013324738
Litorimonas	neg_1382	0.830303013324738
Zhihengliuella	neg_1382	-0.806060612201691
Lawsonella	neg_1382	0.869304955005646
Rodentibacter	neg_1382	0.830303013324738
Marivita	neg_1382	-0.818181812763214
Acetivibrio	neg_1382	-0.830303013324738
Harryflintia	neg_1382	0.806060612201691
Izhakiella	neg_1382	0.808514356613159
Candidatus_Sulfotelmatomonas	neg_1382	0.818181812763214
Desulfocucumis	neg_1382	-0.903030276298523
Promicromonospora	neg_1382	0.806060612201691
Mudcatvirus	neg_1382	0.830303013324738
Succinimonas	neg_1382	-0.806060612201691
Catenovulum	neg_1438	-0.818181812763214
Anaerotignum	neg_1438	-0.818181812763214
Kriegella	neg_1438	0.939393937587738
Candidatus_Kryptonium	neg_1438	0.842424213886261
Mycolicibacter	neg_1438	-0.806060612201691
Parapedobacter	neg_1438	0.927272737026215
Propionicimonas	neg_1438	0.899700224399567
Palleronia	neg_1438	-0.869304955005646
Sinirhodobacter	neg_1438	-0.890909075737
Microscilla	neg_1438	0.866666674613953
Limnobacter	neg_1438	0.875383973121643
Thermoanaerobacter	neg_1438	0.818181812763214
Jiangella	neg_1438	0.854545474052429
Negativicoccus	neg_1438	-0.806060612201691
Acidaminobacter	neg_1438	0.842424213886261
Sideroxydans	neg_1438	-0.975757598876953
Mailhella	neg_1438	-0.915151536464691
Synergistes	neg_1438	-0.854545474052429
Anoxybacillus	neg_1438	0.842424213886261
Flexilinea	neg_1438	-0.927272737026215
Haliscomenobacter	neg_1450	0.846925735473633
Zhihengliuella	neg_1450	-0.833995580673218
Izhakiella	neg_1450	0.849503874778748
Succinimonas	neg_1450	-0.846925735473633
Anaerotignum	neg_1496	-0.915151536464691
Erythrobacter	neg_1496	0.866666674613953
Litorimonas	neg_1496	0.890909075737
Brevinema	neg_1496	0.818181812763214
Parapedobacter	neg_1496	0.830303013324738
Zhihengliuella	neg_1496	-0.866666674613953
Lawsonella	neg_1496	0.826751530170441
Rodentibacter	neg_1496	0.915151536464691
Marivita	neg_1496	-0.830303013324738
Larkinella	neg_1496	0.806060612201691
Limnobacter	neg_1496	0.83890962600708
Harryflintia	neg_1496	0.842424213886261
Trichormus	neg_1496	-0.830303013324738
Izhakiella	neg_1496	0.899700224399567
Desulfocucumis	neg_1496	-0.878787875175476
Porticoccus	neg_1496	0.854545474052429
Succinimonas	neg_1496	-0.830303013324738
Anaerotignum	neg_162	-0.866666674613953
Brevinema	neg_162	0.890909075737
Mycolicibacter	neg_162	-0.842424213886261
Parapedobacter	neg_162	0.939393937587738
Palleronia	neg_162	-0.802435338497162
Mongoliibacter	neg_162	0.927272737026215
Marivita	neg_162	-0.818181812763214
Suttonella	neg_162	-0.854545474052429
Limnobacter	neg_162	0.83890962600708
Sideroxydans	neg_162	-0.903030276298523
Comamonas	neg_162	-0.806060612201691
Anoxybacillus	neg_162	0.866666674613953
Flexilinea	neg_162	-0.830303013324738
Candidatus_Symbiobacter	neg_162	0.915151536464691
Cvm10virus	neg_162	0.800390899181366
Rodentibacter	neg_1649	0.830303013324738
Marivita	neg_1649	-0.854545474052429
Acetivibrio	neg_1649	-0.939393937587738
Dolosicoccus	neg_1649	-0.806060612201691
Mudcatvirus	neg_1649	0.866666674613953
Stappia	neg_1781	0.878787875175476
Caloramator	neg_1781	0.806060612201691
Candidatus_Kryptonium	neg_1781	0.806060612201691
Candidatus_Tokpelaia	neg_1781	0.806060612201691
Haliscomenobacter	neg_1781	0.818181812763214
Lawsonella	neg_1781	0.97872793674469
Palleronia	neg_1781	-0.844988703727722
Halothiobacillus	neg_1781	-0.818181812763214
Variovorax	neg_1781	0.830303013324738
Succinimonas	neg_1781	-0.854545474052429
Beggiatoa	neg_1791	0.927272737026215
Kriegella	neg_1796	0.830303013324738
Candidatus_Kryptonium	neg_1796	0.806060612201691
Candidatus_Moduliflexus	neg_1796	0.866666674613953
Ottowia	neg_1796	-0.818181812763214
Gottschalkia	neg_1796	0.915151536464691
Melissococcus	neg_1796	-0.866666674613953
Methanosalsum	neg_1796	-0.878787875175476
Thiodictyon	neg_1796	-0.890909075737
Metaprevotella	neg_1796	0.818181812763214
Thermobifida	neg_1798	-0.854545474052429
Stappia	neg_1798	0.927272737026215
Caloramator	neg_1798	0.842424213886261
Candidatus_Kryptonium	neg_1798	0.806060612201691
Lawsonella	neg_1798	0.905779242515564
Palleronia	neg_1798	-0.808514356613159
Anaerotignum	neg_1804	-0.83890962600708
Litorimonas	neg_1804	0.83890962600708
Haliscomenobacter	neg_1804	0.820672512054443
Zhihengliuella	neg_1804	-0.863225877285004
Lawsonella	neg_1804	0.878048777580261
Rodentibacter	neg_1804	0.83890962600708
Harryflintia	neg_1804	0.820672512054443
Izhakiella	neg_1804	0.878048777580261
Desulfocucumis	neg_1804	-0.83890962600708
Succinimonas	neg_1804	-0.869304955005646
Brevinema	neg_1852	0.806643962860107
Candidatus_Tokpelaia	neg_1852	0.831656157970428
Lawsonella	neg_1852	0.805963456630707
Beggiatoa	neg_1852	0.906692802906036
Thermobifida	neg_1863	-0.854545474052429
Brevinema	neg_1863	0.818181812763214
Mycolicibacter	neg_1863	-0.806060612201691
Mongoliibacter	neg_1863	0.854545474052429
Turicibacter	neg_1863	0.890909075737
Candidatus_Symbiobacter	neg_1863	0.830303013324738
Beggiatoa	neg_1863	0.854545474052429
Catenovulum	neg_1886	-0.854545474052429
Kriegella	neg_1886	0.842424213886261
Propionicimonas	neg_1886	0.802435338497162
Thermoanaerobacter	neg_1886	0.890909075737
Acidaminobacter	neg_1886	0.842424213886261
Trichormus	neg_1886	-0.806060612201691
Variovorax	neg_1886	0.951515138149261
Anaerobacterium	neg_1901	0.842424213886261
Natribacillus	neg_1901	0.854545474052429
Caldicellulosiruptor	neg_1901	0.806060612201691
Dethiosulfovibrio	neg_193	-0.915151536464691
Candidatus_Sulfotelmatomonas	neg_193	0.830303013324738
Amantichitinum	neg_193	0.878787875175476
Lawsonella	neg_1993	0.851067781448364
Halothiobacillus	neg_1993	-0.818181812763214
Anaerotignum	neg_1996	-0.830303013324738
Litorimonas	neg_1996	0.806060612201691
Haliscomenobacter	neg_1996	0.830303013324738
Zhihengliuella	neg_1996	-0.854545474052429
Lawsonella	neg_1996	0.899700224399567
Rodentibacter	neg_1996	0.818181812763214
Izhakiella	neg_1996	0.899700224399567
Desulfocucumis	neg_1996	-0.806060612201691
Succinimonas	neg_1996	-0.878787875175476
Anaerotignum	neg_2056	-0.852824926376343
Litorimonas	neg_2056	0.828283190727234
Parapedobacter	neg_2056	0.80374151468277
Haliscomenobacter	neg_2056	0.80374151468277
Zhihengliuella	neg_2056	-0.816012322902679
Lawsonella	neg_2056	0.892345726490021
Rodentibacter	neg_2056	0.80374151468277
Palleronia	neg_2056	-0.849266946315765
Larkinella	neg_2056	0.840554058551788
Limnobacter	neg_2056	0.880037486553192
Izhakiella	neg_2056	0.867729306221008
Succinimonas	neg_2056	-0.840554058551788
Stappia	neg_2068	0.854545474052429
Caloramator	neg_2068	0.915151536464691
Candidatus_Tokpelaia	neg_2068	0.878787875175476
Lawsonella	neg_2068	0.857146799564362
Kordiimonas	neg_2068	0.866666674613953
Anaerobacterium	neg_2068	0.806060612201691
Candidatus_Electrothrix	neg_2068	0.854545474052429
Pacificibacter	neg_2068	0.818181812763214
Lawsonella	neg_207	0.826751530170441
Halothiobacillus	neg_207	-0.806060612201691
Kriegella	neg_2109	0.842424213886261
Candidatus_Kryptonium	neg_2109	0.866666674613953
Parapedobacter	neg_2109	0.806060612201691
Ottowia	neg_2109	-0.842424213886261
Propionicimonas	neg_2109	0.857146799564362
Palleronia	neg_2109	-0.826751530170441
Sinirhodobacter	neg_2109	-0.903030276298523
Microscilla	neg_2109	0.818181812763214
Melghirimyces	neg_2109	0.806060612201691
Marmoricola	neg_2109	-0.806060612201691
Novimethylophilus	neg_2109	0.854545474052429
Jiangella	neg_2109	0.890909075737
Melissococcus	neg_2109	-0.854545474052429
Acidaminobacter	neg_2109	0.854545474052429
Sideroxydans	neg_2109	-0.890909075737
Mailhella	neg_2109	-0.975757598876953
Flexilinea	neg_2109	-0.854545474052429
Caloramator	neg_2116	0.866666674613953
Catenovulum	neg_2116	-0.963636338710785
Kriegella	neg_2116	0.878787875175476
Propionicimonas	neg_2116	0.851067781448364
Lawsonella	neg_2116	0.863225877285004
Thermoanaerobacter	neg_2116	0.878787875175476
Anaerobacterium	neg_2116	0.806060612201691
Trichormus	neg_2116	-0.866666674613953
Variovorax	neg_2116	0.915151536464691
Caldicellulosiruptor	neg_2116	0.806060612201691
Eah2virus	neg_2116	0.81251859664917
Thermobifida	neg_2134	-0.866666674613953
Stappia	neg_2134	0.818181812763214
Erythrobacter	neg_2134	0.806060612201691
Pakpunavirus	neg_2134	0.802435338497162
Lihuaxuella	neg_2134	0.854545474052429
Acetivibrio	neg_2134	-0.818181812763214
Fimbriimonas	neg_2134	0.842424213886261
Izhakiella	neg_2134	0.814593434333801
Desulfocucumis	neg_2134	-0.866666674613953
Promicromonospora	neg_2134	0.878787875175476
Litorimonas	neg_2157	0.818181812763214
Zhihengliuella	neg_2157	-0.842424213886261
Rodentibacter	neg_2157	0.818181812763214
Acetivibrio	neg_2157	-0.818181812763214
Izhakiella	neg_2157	0.808514356613159
Desulfocucumis	neg_2157	-0.830303013324738
Thermobifida	neg_2164	-0.818181812763214
Stappia	neg_2164	0.878787875175476
Caloramator	neg_2164	0.806060612201691
Catenovulum	neg_2164	-0.818181812763214
Lawsonella	neg_2164	0.936174511909485
Dethiosulfovibrio	neg_2164	-0.806060612201691
Variovorax	neg_2164	0.830303013324738
Thermobifida	neg_2197	-0.865095794200897
Stappia	neg_2197	0.865095794200897
Caloramator	neg_2197	0.80374151468277
Anaerotignum	neg_2197	-0.828283190727234
Litorimonas	neg_2197	0.828283190727234
Haliscomenobacter	neg_2197	0.852824926376343
Zhihengliuella	neg_2197	-0.80374151468277
Lawsonella	neg_2197	0.904653906822205
Harryflintia	neg_2197	0.852824926376343
Desulfocucumis	neg_2197	-0.840554058551788
Succinimonas	neg_2197	-0.877366662025452
Candidatus_Tokpelaia	neg_2251	0.927272737026215
Kordiimonas	neg_2251	0.939393937587738
Pararhodospirillum	neg_2251	0.818181812763214
Candidatus_Electrothrix	neg_2251	0.854545474052429
Parafilimonas	neg_2251	-0.854545474052429
Thermobifida	neg_2257	-0.820672512054443
Stappia	neg_2257	0.826751530170441
Anaerotignum	neg_2257	-0.826751530170441
Haliscomenobacter	neg_2257	0.814593434333801
Zhihengliuella	neg_2257	-0.851067781448364
Lihuaxuella	neg_2257	0.808514356613159
Lawsonella	neg_2257	0.826219499111176
Rodentibacter	neg_2257	0.826751530170441
Marivita	neg_2257	-0.820672512054443
Acetivibrio	neg_2257	-0.802435338497162
Izhakiella	neg_2257	0.83841460943222
Desulfocucumis	neg_2257	-0.863225877285004
Succinimonas	neg_2257	-0.826751530170441
Catenovulum	neg_2267	-0.866666674613953
Kriegella	neg_2267	0.854545474052429
Thermoanaerobacter	neg_2267	0.890909075737
Variovorax	neg_2267	0.915151536464691
Anaerotignum	neg_2280	-0.83890962600708
Litorimonas	neg_2280	0.851067781448364
Haliscomenobacter	neg_2280	0.820672512054443
Zhihengliuella	neg_2280	-0.863225877285004
Lawsonella	neg_2280	0.853658556938171
Rodentibacter	neg_2280	0.83890962600708
Larkinella	neg_2280	0.820672512054443
Izhakiella	neg_2280	0.914634168148041
Desulfocucumis	neg_2280	-0.814593434333801
Porticoccus	neg_2280	0.826751530170441
Succinimonas	neg_2280	-0.869304955005646
Candidatus_Arcanobacter	neg_2280	0.814593434333801
Zhihengliuella	neg_2282	-0.842424213886261
Lawsonella	neg_2282	0.802435338497162
Izhakiella	neg_2282	0.802435338497162
Sulfobacillus	neg_2298	0.806060612201691
Litorimonas	neg_2373	0.818181812763214
Zhihengliuella	neg_2373	-0.915151536464691
Lawsonella	neg_2373	0.851067781448364
Rodentibacter	neg_2373	0.890909075737
Izhakiella	neg_2373	0.851067781448364
Catenovulum	neg_2400	-0.806060612201691
Kriegella	neg_2400	0.818181812763214
Brevinema	neg_2400	0.842424213886261
Limnobacter	neg_2400	0.826751530170441
Thermoanaerobacter	neg_2400	0.878787875175476
Lmd1virus	neg_2400	-0.806643962860107
Sideroxydans	neg_2400	-0.806060612201691
Anaerotignum	neg_2415	-0.826751530170441
Litorimonas	neg_2415	0.826751530170441
Haliscomenobacter	neg_2415	0.844988703727722
Zhihengliuella	neg_2415	-0.875383973121643
Lawsonella	neg_2415	0.902438998222351
Rodentibacter	neg_2415	0.826751530170441
Izhakiella	neg_2415	0.902438998222351
Succinimonas	neg_2415	-0.893621146678925
Litorimonas	neg_2446	0.878787875175476
Brevinema	neg_2446	0.806060612201691
Haliscomenobacter	neg_2446	0.842424213886261
Zhihengliuella	neg_2446	-0.890909075737
Lawsonella	neg_2446	0.832830607891083
Rodentibacter	neg_2446	0.830303013324738
Harryflintia	neg_2446	0.842424213886261
Izhakiella	neg_2446	0.832830607891083
Desulfocucumis	neg_2446	-0.806060612201691
Porticoccus	neg_2446	0.830303013324738
Succinimonas	neg_2446	-0.866666674613953
Thermobifida	neg_2456	-0.806643962860107
Turicibacter	neg_2456	0.862921476364136
Litorimonas	neg_2461	0.830303013324738
Zhihengliuella	neg_2461	-0.927272737026215
Lawsonella	neg_2461	0.83890962600708
Rodentibacter	neg_2461	0.878787875175476
Izhakiella	neg_2461	0.875383973121643
Porticoccus	neg_2461	0.806060612201691
Succinimonas	neg_2461	-0.842424213886261
Anaerotignum	neg_2462	-0.878787875175476
Erythrobacter	neg_2462	0.830303013324738
Litorimonas	neg_2462	0.854545474052429
Zhihengliuella	neg_2462	-0.830303013324738
Lawsonella	neg_2462	0.887542068958282
Rodentibacter	neg_2462	0.854545474052429
Palleronia	neg_2462	-0.814593434333801
Larkinella	neg_2462	0.830303013324738
Limnobacter	neg_2462	0.814593434333801
Trichormus	neg_2462	-0.818181812763214
Izhakiella	neg_2462	0.887542068958282
Desulfocucumis	neg_2462	-0.854545474052429
Succinimonas	neg_2462	-0.842424213886261
Catenovulum	neg_2485	-0.878787875175476
Lawsonella	neg_2485	0.851067781448364
Anaerobacterium	neg_2485	0.806060612201691
Variovorax	neg_2485	0.878787875175476
Candidatus_Kryptobacter	neg_2485	-0.890909075737
Stappia	neg_2505	0.854545474052429
Caloramator	neg_2505	0.903030276298523
Anaerotignum	neg_2505	-0.806060612201691
Candidatus_Tokpelaia	neg_2505	0.830303013324738
Lawsonella	neg_2505	0.948332667350769
Rodentibacter	neg_2505	0.830303013324738
Marivita	neg_2505	-0.818181812763214
Halothiobacillus	neg_2505	-0.818181812763214
Trichormus	neg_2505	-0.818181812763214
Succinimonas	neg_2505	-0.806060612201691
Catenovulum	neg_2564	-0.830303013324738
Lawsonella	neg_2564	0.83890962600708
Variovorax	neg_2564	0.927272737026215
Litorimonas	neg_2570	0.866666674613953
Zhihengliuella	neg_2570	-0.842424213886261
Rodentibacter	neg_2570	0.818181812763214
Acetivibrio	neg_2570	-0.854545474052429
Desulfocucumis	neg_2570	-0.842424213886261
Porticoccus	neg_2570	0.866666674613953
Anaerotignum	neg_2643	-0.939393937587738
Erythrobacter	neg_2643	0.830303013324738
Candidatus_Kryptonium	neg_2643	0.818181812763214
Litorimonas	neg_2643	0.806060612201691
Parapedobacter	neg_2643	0.842424213886261
Ottowia	neg_2643	-0.806060612201691
Zhihengliuella	neg_2643	-0.866666674613953
Lihuaxuella	neg_2643	0.842424213886261
Lawsonella	neg_2643	0.863225877285004
Rodentibacter	neg_2643	0.915151536464691
Palleronia	neg_2643	-0.899700224399567
Microscilla	neg_2643	0.830303013324738
Limnobacter	neg_2643	0.802435338497162
Melghirimyces	neg_2643	0.854545474052429
Izhakiella	neg_2643	0.948332667350769
Desulfocucumis	neg_2643	-0.854545474052429
Succinimonas	neg_2643	-0.842424213886261
Candidatus_Arcanobacter	neg_2643	0.854545474052429
Erythrobacter	neg_2684	0.820672512054443
Litorimonas	neg_2684	0.887542068958282
Chloroflexus	neg_2684	0.814593434333801
Larkinella	neg_2684	0.942253589630127
Thermosyntropha	neg_2684	0.814593434333801
Trichormus	neg_2684	-0.814593434333801
Porticoccus	neg_2684	0.863225877285004
Natronolimnobius	neg_2684	0.820672512054443
Ktedonobacter	neg_2684	0.899700224399567
Turicibacter	neg_2754	0.878787875175476
Natribacillus	neg_2754	0.854545474052429
Brevinema	neg_2803	0.854545474052429
Mongoliibacter	neg_2803	0.806060612201691
Limnobacter	neg_2803	0.808514356613159
Thermoanaerobacter	neg_2803	0.842424213886261
Lmd1virus	neg_2803	-0.831656157970428
Eah2virus	neg_2803	0.805690705776215
Stappia	neg_2833	0.842424213886261
Lawsonella	neg_2833	0.936174511909485
Variovorax	neg_2833	0.866666674613953
Stappia	neg_2842	0.830303013324738
Caloramator	neg_2842	0.866666674613953
Catenovulum	neg_2842	-0.830303013324738
Anaerotignum	neg_2842	-0.806060612201691
Kriegella	neg_2842	0.818181812763214
Candidatus_Kryptonium	neg_2842	0.842424213886261
Candidatus_Tokpelaia	neg_2842	0.830303013324738
Lawsonella	neg_2842	0.948332667350769
Palleronia	neg_2842	-0.869304955005646
Sinirhodobacter	neg_2842	-0.806060612201691
Microscilla	neg_2842	0.878787875175476
Halothiobacillus	neg_2842	-0.806060612201691
Variovorax	neg_2842	0.890909075737
Cvm10virus	neg_2842	0.831656157970428
Thermobifida	neg_286	-0.825403153896332
Litorimonas	neg_286	0.881680607795715
Haliscomenobacter	neg_286	0.856668412685394
Zhihengliuella	neg_286	-0.881680607795715
Lihuaxuella	neg_286	0.806643962860107
Lawsonella	neg_286	0.802827417850494
Rodentibacter	neg_286	0.81915009021759
Acetivibrio	neg_286	-0.806643962860107
Izhakiella	neg_286	0.865548312664032
Desulfocucumis	neg_286	-0.825403153896332
Porticoccus	neg_286	0.856668412685394
Succinimonas	neg_286	-0.856668412685394
Candidatus_Arcanobacter	neg_286	0.800390899181366
Litorimonas	neg_2886	0.878787875175476
Brevinema	neg_2886	0.806060612201691
Haliscomenobacter	neg_2886	0.842424213886261
Zhihengliuella	neg_2886	-0.890909075737
Lawsonella	neg_2886	0.832830607891083
Rodentibacter	neg_2886	0.830303013324738
Harryflintia	neg_2886	0.842424213886261
Izhakiella	neg_2886	0.832830607891083
Desulfocucumis	neg_2886	-0.806060612201691
Porticoccus	neg_2886	0.830303013324738
Succinimonas	neg_2886	-0.866666674613953
Litorimonas	neg_2932	0.854545474052429
Haliscomenobacter	neg_2932	0.806060612201691
Zhihengliuella	neg_2932	-0.915151536464691
Lawsonella	neg_2932	0.851067781448364
Rodentibacter	neg_2932	0.842424213886261
Izhakiella	neg_2932	0.875383973121643
Porticoccus	neg_2932	0.830303013324738
Succinimonas	neg_2932	-0.854545474052429
Limnobacter	neg_2965	0.826219499111176
Thermoanaerobacter	neg_2965	0.820672512054443
Eah2virus	neg_2965	0.808143377304077
Rodentibacter	neg_2972	0.830303013324738
Palleronia	neg_2972	-0.863225877285004
Leminorella	neg_2972	-0.842424213886261
Thermobifida	neg_3064	-0.818181812763214
Litorimonas	neg_3064	0.903030276298523
Brevinema	neg_3064	0.830303013324738
Haliscomenobacter	neg_3064	0.842424213886261
Zhihengliuella	neg_3064	-0.878787875175476
Lmd1virus	neg_3064	-0.81915009021759
Harryflintia	neg_3064	0.806060612201691
Porticoccus	neg_3064	0.878787875175476
Succinimonas	neg_3064	-0.818181812763214
Anaerotignum	neg_3088	-0.828283190727234
Erythrobacter	neg_3088	0.80374151468277
Litorimonas	neg_3088	0.877366662025452
Haliscomenobacter	neg_3088	0.80374151468277
Zhihengliuella	neg_3088	-0.852824926376343
Rodentibacter	neg_3088	0.840554058551788
Harryflintia	neg_3088	0.852824926376343
Izhakiella	neg_3088	0.85542106628418
Desulfocucumis	neg_3088	-0.877366662025452
Porticoccus	neg_3088	0.852824926376343
Succinimonas	neg_3088	-0.828283190727234
Kordiimonas	neg_3092	0.854545474052429
Pararhodospirillum	neg_3092	0.951515138149261
Thermopetrobacter	neg_3092	0.890909075737
Litorimonas	neg_3198	0.842424213886261
Candidatus_Tokpelaia	neg_3198	0.830303013324738
Zhihengliuella	neg_3198	-0.927272737026215
Kordiimonas	neg_3198	0.842424213886261
Lmd1virus	neg_3198	-0.806643962860107
Dolosicoccus	neg_3198	-0.806060612201691
Anaerotignum	neg_3351	-0.806060612201691
Kriegella	neg_3351	0.818181812763214
Lawsonella	neg_3351	0.887542068958282
Palleronia	neg_3351	-0.851067781448364
Variovorax	neg_3351	0.806060612201691
Leminorella	neg_3351	-0.830303013324738
Eah2virus	neg_3351	0.833002269268036
Anaerotignum	neg_3355	-0.806060612201691
Dethiosulfovibrio	neg_3355	-0.903030276298523
Candidatus_Sulfotelmatomonas	neg_3355	0.915151536464691
Amantichitinum	neg_3355	0.878787875175476
Thermobifida	neg_3360	-0.825403153896332
Anaerotignum	neg_3360	-0.869174480438232
Erythrobacter	neg_3360	0.850415349006653
Litorimonas	neg_3360	0.894186735153198
Brevinema	neg_3360	0.850415349006653
Ottowia	neg_3360	-0.825403153896332
Haliscomenobacter	neg_3360	0.831656157970428
Zhihengliuella	neg_3360	-0.881680607795715
Lihuaxuella	neg_3360	0.81915009021759
Lawsonella	neg_3360	0.802827417850494
Rodentibacter	neg_3360	0.881680607795715
Candidatus_Sulfopaludibacter	neg_3360	0.806643962860107
Palleronia	neg_3360	-0.840459942817688
Larkinella	neg_3360	0.800390899181366
Acetivibrio	neg_3360	-0.844162285327911
Limnobacter	neg_3360	0.871820390224457
Dolosicoccus	neg_3360	-0.81915009021759
Izhakiella	neg_3360	0.878092467784882
Desulfocucumis	neg_3360	-0.862921476364136
Porticoccus	neg_3360	0.856668412685394
Succinimonas	neg_3360	-0.831656157970428
Candidatus_Arcanobacter	neg_3360	0.812897026538849
Thermobifida	neg_3377	-0.806060612201691
Stappia	neg_3377	0.854545474052429
Lawsonella	neg_3377	0.844988703727722
Halothiobacillus	neg_3377	-0.842424213886261
Succinimonas	neg_3377	-0.818181812763214
Anaerotignum	neg_344	-0.818181812763214
Brevinema	neg_344	0.878787875175476
Parapedobacter	neg_344	0.830303013324738
Ottowia	neg_344	-0.854545474052429
Haliscomenobacter	neg_344	0.903030276298523
Zhihengliuella	neg_344	-0.890909075737
Lihuaxuella	neg_344	0.842424213886261
Rodentibacter	neg_344	0.830303013324738
Candidatus_Sulfopaludibacter	neg_344	0.818181812763214
Palleronia	neg_344	-0.899700224399567
Suttonella	neg_344	-0.903030276298523
Limnobacter	neg_344	0.863225877285004
Melghirimyces	neg_344	0.818181812763214
Dolosicoccus	neg_344	-0.866666674613953
Izhakiella	neg_344	0.881463050842285
Thermopetrobacter	neg_344	0.818181812763214
Succinimonas	neg_344	-0.878787875175476
Candidatus_Arcanobacter	neg_344	0.878787875175476
Thermoanaerobacter	neg_3440	0.830303013324738
Eah2virus	neg_3440	0.805690705776215
Pakpunavirus	neg_3458	0.857146799564362
Ottowia	neg_3458	-0.890909075737
Lihuaxuella	neg_3458	0.854545474052429
Candidatus_Sulfopaludibacter	neg_3458	0.878787875175476
Larkinella	neg_3458	0.818181812763214
Microscilla	neg_3458	0.842424213886261
Melghirimyces	neg_3458	0.806060612201691
Novimethylophilus	neg_3458	0.878787875175476
Thermopetrobacter	neg_3458	0.818181812763214
Natronolimnobius	neg_3458	0.830303013324738
Candidatus_Arcanobacter	neg_3458	0.842424213886261
Thermobifida	neg_3496	-0.842424213886261
Stappia	neg_3496	0.806060612201691
Litorimonas	neg_3496	0.830303013324738
Haliscomenobacter	neg_3496	0.806060612201691
Zhihengliuella	neg_3496	-0.830303013324738
Acetivibrio	neg_3496	-0.818181812763214
Harryflintia	neg_3496	0.806060612201691
Desulfocucumis	neg_3496	-0.866666674613953
Succinimonas	neg_3496	-0.806060612201691
Thermobifida	neg_3504	-0.80374151468277
Anaerotignum	neg_3504	-0.816012322902679
Litorimonas	neg_3504	0.852824926376343
Haliscomenobacter	neg_3504	0.828283190727234
Zhihengliuella	neg_3504	-0.865095794200897
Lawsonella	neg_3504	0.843112826347351
Rodentibacter	neg_3504	0.828283190727234
Harryflintia	neg_3504	0.828283190727234
Izhakiella	neg_3504	0.843112826347351
Desulfocucumis	neg_3504	-0.852824926376343
Porticoccus	neg_3504	0.80374151468277
Succinimonas	neg_3504	-0.852824926376343
Thermoanaerobacter	neg_3586	0.806060612201691
Anaerotignum	neg_3592	-0.878787875175476
Litorimonas	neg_3592	0.818181812763214
Zhihengliuella	neg_3592	-0.854545474052429
Lihuaxuella	neg_3592	0.842424213886261
Lawsonella	neg_3592	0.814593434333801
Rodentibacter	neg_3592	0.866666674613953
Palleronia	neg_3592	-0.808514356613159
Izhakiella	neg_3592	0.948332667350769
Desulfocucumis	neg_3592	-0.842424213886261
Porticoccus	neg_3592	0.818181812763214
Succinimonas	neg_3592	-0.842424213886261
Candidatus_Arcanobacter	neg_3592	0.866666674613953
Anaerotignum	neg_3608	-0.828283190727234
Erythrobacter	neg_3608	0.80374151468277
Litorimonas	neg_3608	0.877366662025452
Haliscomenobacter	neg_3608	0.80374151468277
Zhihengliuella	neg_3608	-0.852824926376343
Rodentibacter	neg_3608	0.840554058551788
Harryflintia	neg_3608	0.852824926376343
Izhakiella	neg_3608	0.85542106628418
Desulfocucumis	neg_3608	-0.877366662025452
Porticoccus	neg_3608	0.852824926376343
Succinimonas	neg_3608	-0.828283190727234
Stappia	neg_3609	0.830303013324738
Caloramator	neg_3609	0.806060612201691
Anaerotignum	neg_3609	-0.903030276298523
Litorimonas	neg_3609	0.806060612201691
Brevinema	neg_3609	0.806060612201691
Haliscomenobacter	neg_3609	0.806060612201691
Zhihengliuella	neg_3609	-0.854545474052429
Lawsonella	neg_3609	0.924016416072845
Rodentibacter	neg_3609	0.878787875175476
Palleronia	neg_3609	-0.808514356613159
Marivita	neg_3609	-0.842424213886261
Izhakiella	neg_3609	0.875383973121643
Desulfocucumis	neg_3609	-0.866666674613953
Succinimonas	neg_3609	-0.854545474052429
Litorimonas	neg_3637	0.878787875175476
Brevinema	neg_3637	0.806060612201691
Haliscomenobacter	neg_3637	0.842424213886261
Zhihengliuella	neg_3637	-0.890909075737
Lawsonella	neg_3637	0.832830607891083
Rodentibacter	neg_3637	0.830303013324738
Harryflintia	neg_3637	0.842424213886261
Izhakiella	neg_3637	0.832830607891083
Desulfocucumis	neg_3637	-0.806060612201691
Porticoccus	neg_3637	0.830303013324738
Succinimonas	neg_3637	-0.866666674613953
Anaerotignum	neg_3653	-0.842424213886261
Litorimonas	neg_3653	0.818181812763214
Haliscomenobacter	neg_3653	0.806060612201691
Zhihengliuella	neg_3653	-0.842424213886261
Lawsonella	neg_3653	0.875383973121643
Rodentibacter	neg_3653	0.830303013324738
Harryflintia	neg_3653	0.806060612201691
Izhakiella	neg_3653	0.875383973121643
Desulfocucumis	neg_3653	-0.854545474052429
Succinimonas	neg_3653	-0.854545474052429
Stappia	neg_3666	0.830303013324738
Caloramator	neg_3666	0.866666674613953
Chloroflexus	neg_3666	0.818181812763214
Candidatus_Tokpelaia	neg_3666	0.842424213886261
Pakpunavirus	neg_3666	0.857146799564362
Lawsonella	neg_3666	0.826751530170441
Kordiimonas	neg_3666	0.806060612201691
Microscilla	neg_3666	0.830303013324738
Halothiobacillus	neg_3666	-0.854545474052429
Candidatus_Electrothrix	neg_3666	0.818181812763214
Cvm10virus	neg_3666	0.81915009021759
Parafilimonas	neg_3666	-0.854545474052429
Thermobifida	neg_3689	-0.806060612201691
Stappia	neg_3689	0.842424213886261
Anaerotignum	neg_3689	-0.854545474052429
Haliscomenobacter	neg_3689	0.842424213886261
Zhihengliuella	neg_3689	-0.854545474052429
Lihuaxuella	neg_3689	0.818181812763214
Lawsonella	neg_3689	0.930095493793488
Rodentibacter	neg_3689	0.830303013324738
Palleronia	neg_3689	-0.881463050842285
Izhakiella	neg_3689	0.881463050842285
Succinimonas	neg_3689	-0.866666674613953
Candidatus_Arcanobacter	neg_3689	0.806060612201691
Anaerotignum	neg_3739	-0.830303013324738
Erythrobacter	neg_3739	0.842424213886261
Kriegella	neg_3739	0.830303013324738
Candidatus_Kryptonium	neg_3739	0.842424213886261
Parapedobacter	neg_3739	0.854545474052429
Pakpunavirus	neg_3739	0.857146799564362
Ottowia	neg_3739	-0.939393937587738
Propionicimonas	neg_3739	0.917937397956848
Candidatus_Sulfopaludibacter	neg_3739	0.806060612201691
Palleronia	neg_3739	-0.869304955005646
Sinirhodobacter	neg_3739	-0.806060612201691
Microscilla	neg_3739	0.915151536464691
Melghirimyces	neg_3739	0.842424213886261
Marmoricola	neg_3739	-0.915151536464691
Novimethylophilus	neg_3739	0.890909075737
Jiangella	neg_3739	0.878787875175476
Melissococcus	neg_3739	-0.915151536464691
Mailhella	neg_3739	-0.915151536464691
Fimbriimonas	neg_3739	0.818181812763214
Candidatus_Kryptobacter	neg_3739	-0.830303013324738
Candidatus_Sulfopaludibacter	neg_3759	0.840554058551788
Candidatus_Electrothrix	neg_3759	0.828283190727234
Lmd1virus	neg_3762	-0.800390899181366
Mongoliibacter	neg_3785	0.854545474052429
Emticicia	neg_3785	0.842424213886261
Suttonella	neg_3785	-0.842424213886261
Candidatus_Symbiobacter	neg_3785	0.866666674613953
Anaerotignum	neg_3807	-0.806060612201691
Lawsonella	neg_3807	0.875383973121643
Palleronia	neg_3807	-0.802435338497162
Dethiosulfovibrio	neg_3807	-0.854545474052429
Izhakiella	neg_3807	0.802435338497162
Leminorella	neg_3807	-0.830303013324738
Amantichitinum	neg_3807	0.806060612201691
Thermobifida	neg_3820	-0.830303013324738
Stappia	neg_3820	0.818181812763214
Anaerotignum	neg_3820	-0.866666674613953
Erythrobacter	neg_3820	0.878787875175476
Litorimonas	neg_3820	0.854545474052429
Lawsonella	neg_3820	0.820672512054443
Rodentibacter	neg_3820	0.842424213886261
Marivita	neg_3820	-0.806060612201691
Acetivibrio	neg_3820	-0.854545474052429
Harryflintia	neg_3820	0.830303013324738
Trichormus	neg_3820	-0.806060612201691
Fimbriimonas	neg_3820	0.806060612201691
Izhakiella	neg_3820	0.820672512054443
Candidatus_Sulfotelmatomonas	neg_3820	0.842424213886261
Desulfocucumis	neg_3820	-0.927272737026215
Promicromonospora	neg_3820	0.842424213886261
Mudcatvirus	neg_3820	0.854545474052429
Caloramator	neg_3852	0.830303013324738
Catenovulum	neg_3852	-0.903030276298523
Kriegella	neg_3852	0.854545474052429
Candidatus_Kryptonium	neg_3852	0.806060612201691
Mycolicibacter	neg_3852	-0.842424213886261
Parapedobacter	neg_3852	0.842424213886261
Propionicimonas	neg_3852	0.802435338497162
Lawsonella	neg_3852	0.905779242515564
Microscilla	neg_3852	0.818181812763214
Thermoanaerobacter	neg_3852	0.854545474052429
Sideroxydans	neg_3852	-0.830303013324738
Anoxybacillus	neg_3852	0.806060612201691
Variovorax	neg_3852	0.878787875175476
Caldicellulosiruptor	neg_3852	0.854545474052429
Cvm10virus	neg_3852	0.875427544116974
Anaerotignum	neg_392	-0.842424213886261
Litorimonas	neg_392	0.818181812763214
Haliscomenobacter	neg_392	0.806060612201691
Zhihengliuella	neg_392	-0.842424213886261
Lawsonella	neg_392	0.875383973121643
Rodentibacter	neg_392	0.830303013324738
Harryflintia	neg_392	0.806060612201691
Izhakiella	neg_392	0.875383973121643
Desulfocucumis	neg_392	-0.854545474052429
Succinimonas	neg_392	-0.854545474052429
Anaerotignum	neg_3940	-0.854545474052429
Litorimonas	neg_3940	0.866666674613953
Haliscomenobacter	neg_3940	0.842424213886261
Zhihengliuella	neg_3940	-0.878787875175476
Lawsonella	neg_3940	0.936174511909485
Rodentibacter	neg_3940	0.854545474052429
Palleronia	neg_3940	-0.802435338497162
Limnobacter	neg_3940	0.820672512054443
Trichormus	neg_3940	-0.818181812763214
Izhakiella	neg_3940	0.875383973121643
Succinimonas	neg_3940	-0.890909075737
Thermobifida	neg_410	-0.818181812763214
Stappia	neg_410	0.854545474052429
Caloramator	neg_410	0.915151536464691
Chloroflexus	neg_410	0.854545474052429
Defluviimonas	neg_410	-0.854545474052429
Anaerobacterium	neg_410	0.951515138149261
Methanosphaerula	neg_410	-0.842424213886261
Natribacillus	neg_410	0.927272737026215
Candidatus_Halobonum	neg_410	0.863225877285004
Thermobifida	neg_412	-0.818181812763214
Haliscomenobacter	neg_412	0.878787875175476
Emticicia	neg_412	0.878787875175476
Suttonella	neg_412	-0.854545474052429
Harryflintia	neg_412	0.818181812763214
Candidatus_Symbiobacter	neg_412	0.830303013324738
Succinimonas	neg_412	-0.854545474052429
Anaerotignum	neg_420	-0.806060612201691
Zhihengliuella	neg_420	-0.890909075737
Lawsonella	neg_420	0.83890962600708
Rodentibacter	neg_420	0.866666674613953
Izhakiella	neg_420	0.875383973121643
Succinimonas	neg_420	-0.818181812763214
Thermobifida	neg_430	-0.840554058551788
Stappia	neg_430	0.828283190727234
Litorimonas	neg_430	0.80374151468277
Haliscomenobacter	neg_430	0.865095794200897
Zhihengliuella	neg_430	-0.816012322902679
Lawsonella	neg_430	0.867729306221008
Harryflintia	neg_430	0.840554058551788
Izhakiella	neg_430	0.818496406078339
Desulfocucumis	neg_430	-0.816012322902679
Succinimonas	neg_430	-0.889637529850006
Thermobifida	neg_552	-0.806060612201691
Anaerotignum	neg_552	-0.903030276298523
Erythrobacter	neg_552	0.903030276298523
Litorimonas	neg_552	0.842424213886261
Pakpunavirus	neg_552	0.802435338497162
Zhihengliuella	neg_552	-0.806060612201691
Lihuaxuella	neg_552	0.818181812763214
Rodentibacter	neg_552	0.878787875175476
Candidatus_Sulfopaludibacter	neg_552	0.818181812763214
Marivita	neg_552	-0.830303013324738
Acetivibrio	neg_552	-0.866666674613953
Harryflintia	neg_552	0.806060612201691
Fimbriimonas	neg_552	0.818181812763214
Izhakiella	neg_552	0.857146799564362
Candidatus_Sulfotelmatomonas	neg_552	0.830303013324738
Desulfocucumis	neg_552	-0.939393937587738
Promicromonospora	neg_552	0.830303013324738
Mudcatvirus	neg_552	0.866666674613953
Porticoccus	neg_552	0.806060612201691
Anaerotignum	neg_64	-0.878787875175476
Erythrobacter	neg_64	0.878787875175476
Kriegella	neg_64	0.915151536464691
Candidatus_Kryptonium	neg_64	0.842424213886261
Parapedobacter	neg_64	0.854545474052429
Ottowia	neg_64	-0.818181812763214
Propionicimonas	neg_64	0.887542068958282
Lawsonella	neg_64	0.802435338497162
Rodentibacter	neg_64	0.915151536464691
Palleronia	neg_64	-0.930095493793488
Sinirhodobacter	neg_64	-0.830303013324738
Microscilla	neg_64	0.951515138149261
Limnobacter	neg_64	0.83890962600708
Melghirimyces	neg_64	0.866666674613953
Novimethylophilus	neg_64	0.890909075737
Jiangella	neg_64	0.854545474052429
Acidaminobacter	neg_64	0.866666674613953
Trichormus	neg_64	-0.830303013324738
Sideroxydans	neg_64	-0.842424213886261
Thermobifida	neg_677	-0.818181812763214
Pakpunavirus	neg_677	0.863225877285004
Ottowia	neg_677	-0.854545474052429
Haliscomenobacter	neg_677	0.818181812763214
Lihuaxuella	neg_677	0.903030276298523
Candidatus_Sulfopaludibacter	neg_677	0.830303013324738
Fimbriimonas	neg_677	0.818181812763214
Thermopetrobacter	neg_677	0.818181812763214
Candidatus_Arcanobacter	neg_677	0.854545474052429
Catenovulum	neg_685	-0.806060612201691
Kriegella	neg_685	0.818181812763214
Brevinema	neg_685	0.842424213886261
Limnobacter	neg_685	0.826751530170441
Thermoanaerobacter	neg_685	0.878787875175476
Lmd1virus	neg_685	-0.806643962860107
Sideroxydans	neg_685	-0.806060612201691
Anaerotignum	neg_71	-0.878787875175476
Kriegella	neg_71	0.830303013324738
Candidatus_Kryptonium	neg_71	0.878787875175476
Zhihengliuella	neg_71	-0.830303013324738
Lawsonella	neg_71	0.893621146678925
Rodentibacter	neg_71	0.866666674613953
Palleronia	neg_71	-0.948332667350769
Sinirhodobacter	neg_71	-0.866666674613953
Microscilla	neg_71	0.830303013324738
Limnobacter	neg_71	0.802435338497162
Melghirimyces	neg_71	0.854545474052429
Izhakiella	neg_71	0.857146799564362
Leminorella	neg_71	-0.818181812763214
Anaerotignum	neg_726	-0.842424213886261
Litorimonas	neg_726	0.818181812763214
Haliscomenobacter	neg_726	0.806060612201691
Zhihengliuella	neg_726	-0.842424213886261
Lawsonella	neg_726	0.875383973121643
Rodentibacter	neg_726	0.830303013324738
Harryflintia	neg_726	0.806060612201691
Izhakiella	neg_726	0.875383973121643
Desulfocucumis	neg_726	-0.854545474052429
Succinimonas	neg_726	-0.854545474052429
Thermobifida	neg_727	-0.852824926376343
Litorimonas	neg_727	0.901908397674561
Brevinema	neg_727	0.877366662025452
Candidatus_Tokpelaia	neg_727	0.80374151468277
Haliscomenobacter	neg_727	0.889637529850006
Zhihengliuella	neg_727	-0.901908397674561
Lawsonella	neg_727	0.843112826347351
Rodentibacter	neg_727	0.80374151468277
Limnobacter	neg_727	0.85542106628418
Lmd1virus	neg_727	-0.848254203796387
Porticoccus	neg_727	0.816012322902679
Succinimonas	neg_727	-0.865095794200897
Thermobifida	neg_757	-0.818181812763214
Litorimonas	neg_757	0.866666674613953
Brevinema	neg_757	0.818181812763214
Haliscomenobacter	neg_757	0.830303013324738
Zhihengliuella	neg_757	-0.866666674613953
Rodentibacter	neg_757	0.806060612201691
Marivita	neg_757	-0.806060612201691
Harryflintia	neg_757	0.830303013324738
Desulfocucumis	neg_757	-0.830303013324738
Porticoccus	neg_757	0.818181812763214
Succinimonas	neg_757	-0.830303013324738
Anaerotignum	neg_758	-0.818181812763214
Erythrobacter	neg_758	0.878787875175476
Kriegella	neg_758	0.890909075737
Ottowia	neg_758	-0.854545474052429
Propionicimonas	neg_758	0.887542068958282
Rodentibacter	neg_758	0.854545474052429
Palleronia	neg_758	-0.911858320236206
Sinirhodobacter	neg_758	-0.806060612201691
Larkinella	neg_758	0.830303013324738
Microscilla	neg_758	0.927272737026215
Limnobacter	neg_758	0.863225877285004
Melghirimyces	neg_758	0.818181812763214
Novimethylophilus	neg_758	0.866666674613953
Jiangella	neg_758	0.830303013324738
Acidaminobacter	neg_758	0.830303013324738
Trichormus	neg_758	-0.806060612201691
Fimbriimonas	neg_758	0.806060612201691
Eah2virus	neg_758	0.833002269268036
Thermobifida	neg_794	-0.866666674613953
Litorimonas	neg_794	0.854545474052429
Brevinema	neg_794	0.830303013324738
Haliscomenobacter	neg_794	0.878787875175476
Zhihengliuella	neg_794	-0.878787875175476
Lmd1virus	neg_794	-0.806643962860107
Porticoccus	neg_794	0.806060612201691
Succinimonas	neg_794	-0.830303013324738
Chloroflexus	neg_842	0.830303013324738
Candidatus_Tokpelaia	neg_842	0.830303013324738
Pakpunavirus	neg_842	0.802435338497162
Haliscomenobacter	neg_842	0.806060612201691
Pararhodospirillum	neg_842	0.818181812763214
Halothiobacillus	neg_842	-0.842424213886261
Parafilimonas	neg_842	-0.915151536464691
Succinimonas	neg_842	-0.806060612201691
Anaerotignum	neg_861	-0.830303013324738
Litorimonas	neg_861	0.854545474052429
Haliscomenobacter	neg_861	0.818181812763214
Zhihengliuella	neg_861	-0.806060612201691
Lawsonella	neg_861	0.802435338497162
Rodentibacter	neg_861	0.806060612201691
Larkinella	neg_861	0.830303013324738
Harryflintia	neg_861	0.890909075737
Izhakiella	neg_861	0.875383973121643
Desulfocucumis	neg_861	-0.830303013324738
Porticoccus	neg_861	0.842424213886261
Succinimonas	neg_861	-0.866666674613953
Anaerotignum	neg_911	-0.927272737026215
Candidatus_Kryptonium	neg_911	0.830303013324738
Brevinema	neg_911	0.806060612201691
Parapedobacter	neg_911	0.818181812763214
Haliscomenobacter	neg_911	0.818181812763214
Zhihengliuella	neg_911	-0.878787875175476
Lihuaxuella	neg_911	0.830303013324738
Lawsonella	neg_911	0.911858320236206
Rodentibacter	neg_911	0.903030276298523
Palleronia	neg_911	-0.899700224399567
Marivita	neg_911	-0.806060612201691
Microscilla	neg_911	0.806060612201691
Melghirimyces	neg_911	0.842424213886261
Izhakiella	neg_911	0.936174511909485
Desulfocucumis	neg_911	-0.830303013324738
Succinimonas	neg_911	-0.866666674613953
Candidatus_Arcanobacter	neg_911	0.830303013324738
Erythrobacter	neg_919	0.806060612201691
Kriegella	neg_919	0.854545474052429
Ottowia	neg_919	-0.854545474052429
Propionicimonas	neg_919	0.83890962600708
Palleronia	neg_919	-0.887542068958282
Sinirhodobacter	neg_919	-0.818181812763214
Larkinella	neg_919	0.806060612201691
Microscilla	neg_919	0.830303013324738
Limnobacter	neg_919	0.899700224399567
Marmoricola	neg_919	-0.854545474052429
Mailhella	neg_919	-0.806060612201691
Fimbriimonas	neg_919	0.806060612201691
Leminorella	neg_919	-0.830303013324738
Eah2virus	neg_919	0.846658051013947
Stappia	neg_985	0.842424213886261
Caloramator	neg_985	0.915151536464691
Anaerotignum	neg_985	-0.806060612201691
Erythrobacter	neg_985	0.818181812763214
Litorimonas	neg_985	0.818181812763214
Brevinema	neg_985	0.830303013324738
Candidatus_Tokpelaia	neg_985	0.806060612201691
Zhihengliuella	neg_985	-0.806060612201691
Lawsonella	neg_985	0.881463050842285
Rodentibacter	neg_985	0.866666674613953
Marivita	neg_985	-0.878787875175476
Acetivibrio	neg_985	-0.818181812763214
Trichormus	neg_985	-0.818181812763214
Candidatus_Electrothrix	neg_985	0.806060612201691
Desulfocucumis	neg_985	-0.806060612201691
Mudcatvirus	neg_985	0.818181812763214
Eah2virus	neg_985	0.805690705776215
Thermobifida	neg_994	-0.854545474052429
Stappia	neg_994	0.842424213886261
Brevinema	neg_994	0.818181812763214
Chloroflexus	neg_994	0.878787875175476
Mycolicibacter	neg_994	-0.842424213886261
Candidatus_Tokpelaia	neg_994	0.903030276298523
Pakpunavirus	neg_994	0.911858320236206
Ottowia	neg_994	-0.842424213886261
Haliscomenobacter	neg_994	0.830303013324738
Candidatus_Sulfopaludibacter	neg_994	0.878787875175476
Kordiimonas	neg_994	0.842424213886261
Pararhodospirillum	neg_994	0.866666674613953
Comamonas	neg_994	-0.866666674613953
Candidatus_Electrothrix	neg_994	0.927272737026215
Thermopetrobacter	neg_994	0.842424213886261
Rubrivivax	neg_994	-0.818181812763214
Parafilimonas	neg_994	-0.866666674613953
