# Supplementary material for: Multi-omics analyses reveal that the gut microbiome and its metabolites promote milk fat synthesis in Zhongdian yak cows
Source: PeerJ journal article supplement (doi:10.7717/peerj.14444), 2022-12-02
Supplement: neg_biomarker_Web_Report.zip [file treat1_H_L.vs.H_L_module_1.xls]

GenesName	metaName	CC
K18198	neg_1065	-0.842424213886261
K07672	neg_1065	0.806643962860107
K03340	neg_1065	0.818181812763214
K11754	neg_1065	0.818181812763214
K02493	neg_1065	0.939393937587738
K02784	neg_1065	0.903030276298523
K03769	neg_1065	0.854545474052429
K17331	neg_1065	0.887625336647034
K09761	neg_1065	0.818181812763214
K19334	neg_1065	0.854545474052429
K21217	neg_1065	-0.826174378395081
K03573	neg_1065	0.854545474052429
K03501	neg_1065	0.842424213886261
K00344	neg_1065	0.830303013324738
K00969	neg_1065	0.830303013324738
K06145	neg_1065	0.818181812763214
K05970	neg_1065	0.866666674613953
K01409	neg_1065	0.830303013324738
K00919	neg_1065	0.842424213886261
K20525	neg_1065	0.927272737026215
K04565	neg_1112	0.830303013324738
K07139	neg_1112	0.830303013324738
K05787	neg_1112	0.854545474052429
K20452	neg_1112	-0.901908397674561
K14575	neg_1112	0.802435338497162
K01814	neg_1116	0.830303013324738
K12072	neg_1116	-0.850415349006653
K02665	neg_1116	-0.887625336647034
K21217	neg_1116	-0.833002269268036
K06871	neg_1116	0.878787875175476
K16014	neg_1116	0.81915009021759
K11933	neg_112	-0.835593700408936
K17329	neg_112	-0.860478162765503
K10237	neg_112	-0.813785552978516
K02461	neg_112	-0.935483872890472
K03651	neg_112	0.800390899181366
K02665	neg_112	-0.845363914966583
K21217	neg_112	-0.845363914966583
K19157	neg_112	0.912945866584778
K03414	neg_112	-0.845363914966583
K05802	neg_112	-0.900500416755676
K05851	neg_112	-0.800000011920929
K10942	neg_112	-0.845363914966583
K06311	neg_112	-0.865548312664032
K02919	neg_112	-0.81915009021759
K17329	neg_1307	-0.859855890274048
K02461	neg_1307	-0.856668412685394
K03651	neg_1307	0.842424213886261
K02665	neg_1307	-0.833002269268036
K19157	neg_1307	0.878787875175476
K04748	neg_1307	-0.818181812763214
K06145	neg_1307	0.806060612201691
K05802	neg_1307	-0.898646354675293
K06311	neg_1307	-0.826751530170441
K02919	neg_1307	-0.806060612201691
K02461	neg_1330	-0.848254203796387
K02665	neg_1330	-0.8156378865242
K21217	neg_1330	-0.8156378865242
K19157	neg_1330	0.889637529850006
K03414	neg_1330	-0.843286633491516
K05802	neg_1330	-0.922830998897552
K10942	neg_1330	-0.843286633491516
K06311	neg_1330	-0.916962146759033
K02919	neg_1330	-0.816012322902679
K17329	neg_1361	-0.911576509475708
K10237	neg_1361	-0.833995580673218
K02461	neg_1361	-0.90043979883194
K01729	neg_1361	0.866666674613953
K03651	neg_1361	0.818181812763214
K06285	neg_1361	-0.854545474052429
K12072	neg_1361	-0.812897026538849
K04565	neg_1361	0.818181812763214
K02665	neg_1361	-0.873969614505768
K21217	neg_1361	-0.846658051013947
K03643	neg_1361	0.830303013324738
K19157	neg_1361	0.854545474052429
K18692	neg_1361	-0.830303013324738
K06145	neg_1361	0.830303013324738
K17680	neg_1361	-0.806060612201691
K05851	neg_1361	-0.806643962860107
K18298	neg_1361	-0.866666674613953
K00057	neg_1361	0.806060612201691
K11754	neg_1363	0.830303013324738
K00297	neg_1363	0.903030276298523
K00848	neg_1363	0.854545474052429
K01151	neg_1363	0.842424213886261
K11933	neg_1382	-0.865095794200897
K17329	neg_1382	-0.872786045074463
K02461	neg_1382	-0.831656157970428
K02745	neg_1382	-0.806060612201691
K03651	neg_1382	0.866666674613953
K06926	neg_1382	0.806060612201691
K19157	neg_1382	0.806060612201691
K04748	neg_1382	-0.866666674613953
K18692	neg_1382	-0.806060612201691
K06145	neg_1382	0.830303013324738
K03414	neg_1382	-0.819346487522125
K05802	neg_1382	-0.885716199874878
K10942	neg_1382	-0.819346487522125
K06311	neg_1382	-0.826751530170441
K02919	neg_1382	-0.830303013324738
K00845	neg_1438	0.818181812763214
K18198	neg_1438	-0.842424213886261
K00640	neg_1438	0.818181812763214
K07672	neg_1438	0.894186735153198
K05946	neg_1438	0.951515138149261
K07099	neg_1438	0.842424213886261
K03340	neg_1438	0.890909075737
K03827	neg_1438	-0.818181812763214
K03470	neg_1438	0.830303013324738
K10237	neg_1438	-0.859855890274048
K01261	neg_1438	0.818181812763214
K07166	neg_1438	0.830303013324738
K17331	neg_1438	0.860313832759857
K09761	neg_1438	0.878787875175476
K00949	neg_1438	0.830303013324738
K14571	neg_1438	-0.844988703727722
K15599	neg_1438	-0.890909075737
K07396	neg_1438	-0.890909075737
K03607	neg_1438	-0.833002269268036
K05985	neg_1438	0.830303013324738
K12231	neg_1438	-0.846658051013947
K05989	neg_1438	0.866666674613953
K09777	neg_1438	0.842424213886261
K15792	neg_1438	0.818181812763214
K00859	neg_1438	0.818181812763214
K16199	neg_1438	0.830303013324738
K01990	neg_1438	0.806060612201691
K00849	neg_1438	0.806060612201691
K00969	neg_1438	0.866666674613953
K03218	neg_1438	0.818181812763214
K10578	neg_1438	-0.846658051013947
K01736	neg_1438	0.806060612201691
K07053	neg_1438	0.842424213886261
K01299	neg_1438	-0.854545474052429
K15598	neg_1438	-0.806060612201691
K05964	neg_1438	-0.842424213886261
K07707	neg_1438	-0.830303013324738
K02461	neg_1450	-0.900500416755676
K19157	neg_1450	0.911576509475708
K05802	neg_1450	-0.862068951129913
K09512	neg_1450	0.834482729434967
K06311	neg_1450	-0.830049574375153
K02919	neg_1450	-0.859855890274048
K18198	neg_1496	-0.890909075737
K07672	neg_1496	0.812897026538849
K11933	neg_1496	-0.816012322902679
K17329	neg_1496	-0.821065366268158
K10237	neg_1496	-0.872786045074463
K02461	neg_1496	-0.869174480438232
K02745	neg_1496	-0.806060612201691
K03651	neg_1496	0.915151536464691
K05830	neg_1496	-0.878787875175476
K21217	neg_1496	-0.833002269268036
K19157	neg_1496	0.866666674613953
K04748	neg_1496	-0.854545474052429
K16014	neg_1496	0.806643962860107
K06145	neg_1496	0.890909075737
K03414	neg_1496	-0.873969614505768
K05802	neg_1496	-0.885716199874878
K10942	neg_1496	-0.873969614505768
K06311	neg_1496	-0.869304955005646
K02919	neg_1496	-0.854545474052429
K02784	neg_1554	0.830303013324738
K05970	neg_1554	0.806060612201691
K20525	neg_1554	0.866666674613953
K18198	neg_162	-0.927272737026215
K00640	neg_162	0.830303013324738
K07672	neg_162	0.887933671474457
K05946	neg_162	0.854545474052429
K03340	neg_162	0.915151536464691
K01159	neg_162	0.830303013324738
K03470	neg_162	0.878787875175476
K07391	neg_162	0.830303013324738
K10237	neg_162	-0.833995580673218
K11754	neg_162	0.806060612201691
K04061	neg_162	-0.842424213886261
K07126	neg_162	0.915151536464691
K03651	neg_162	0.806060612201691
K09761	neg_162	0.866666674613953
K12543	neg_162	-0.842424213886261
K14571	neg_162	-0.83890962600708
K05830	neg_162	-0.878787875175476
K15599	neg_162	-0.818181812763214
K02802	neg_162	0.833002269268036
K06926	neg_162	0.842424213886261
K03501	neg_162	0.806060612201691
K01990	neg_162	0.866666674613953
K03101	neg_162	0.830303013324738
K00849	neg_162	0.818181812763214
K06287	neg_162	0.818181812763214
K00969	neg_162	0.854545474052429
K20885	neg_162	0.818181812763214
K00945	neg_162	0.818181812763214
K05970	neg_162	0.842424213886261
K05964	neg_162	-0.818181812763214
K09789	neg_1649	0.806060612201691
K13014	neg_1649	0.818181812763214
K04748	neg_1649	-0.806060612201691
K18692	neg_1649	-0.830303013324738
K17680	neg_1649	-0.806060612201691
K03415	neg_1649	-0.866666674613953
K01060	neg_1781	0.830303013324738
K11933	neg_1781	-0.975533545017242
K07099	neg_1781	0.806060612201691
K04075	neg_1781	0.806060612201691
K07391	neg_1781	0.806060612201691
K10237	neg_1781	-0.885716199874878
K03524	neg_1781	0.866666674613953
K04096	neg_1781	0.927272737026215
K02461	neg_1781	-0.800390899181366
K04069	neg_1781	0.842424213886261
K09779	neg_1781	0.806060612201691
K00817	neg_1781	0.854545474052429
K06285	neg_1781	-0.854545474052429
K02458	neg_1781	-0.889637529850006
K04565	neg_1781	0.915151536464691
K07031	neg_1781	-0.818181812763214
K03607	neg_1781	-0.805690705776215
K03643	neg_1781	0.806060612201691
K00849	neg_1781	0.854545474052429
K00014	neg_1781	0.818181812763214
K18537	neg_1781	-0.878787875175476
K07720	neg_1781	0.830303013324738
K05851	neg_1781	-0.881680607795715
K14051	neg_1781	0.873969614505768
K03724	neg_1781	0.830303013324738
K07139	neg_1791	0.830303013324738
K05787	neg_1791	0.866666674613953
K00059	neg_1791	0.830303013324738
K08688	neg_1791	0.806060612201691
K00588	neg_1791	-0.852824926376343
K06926	neg_1791	0.818181812763214
K09951	neg_1791	0.830303013324738
K07672	neg_1796	0.812897026538849
K01060	neg_1796	0.806060612201691
K03827	neg_1796	-0.854545474052429
K01261	neg_1796	0.854545474052429
K03406	neg_1796	-0.830303013324738
K03225	neg_1796	-0.915151536464691
K09789	neg_1796	0.866666674613953
K07039	neg_1796	0.818181812763214
K16199	neg_1796	0.806060612201691
K15652	neg_1796	0.927272737026215
K20885	neg_1796	0.854545474052429
K04085	neg_1796	-1
K00230	neg_1796	0.842424213886261
K07341	neg_1796	0.903030276298523
K03415	neg_1796	-0.806060612201691
K01060	neg_1798	0.878787875175476
K11933	neg_1798	-0.914179265499115
K17329	neg_1798	-0.821065366268158
K04096	neg_1798	0.842424213886261
K00817	neg_1798	0.806060612201691
K03412	neg_1798	-0.818181812763214
K06285	neg_1798	-0.866666674613953
K02458	neg_1798	-0.816012322902679
K04565	neg_1798	0.830303013324738
K07031	neg_1798	-0.903030276298523
K21029	neg_1798	-0.866666674613953
K18537	neg_1798	-0.854545474052429
K00887	neg_1798	-0.866666674613953
K07720	neg_1798	0.806060612201691
K14051	neg_1798	0.873969614505768
K07574	neg_1798	0.806060612201691
K11933	neg_1804	-0.861575186252594
K10237	neg_1804	-0.810595333576202
K02461	neg_1804	-0.871820390224457
K03651	neg_1804	0.814593434333801
K21217	neg_1804	-0.814992010593414
K19157	neg_1804	0.881463050842285
K03414	neg_1804	-0.86978143453598
K05802	neg_1804	-0.933805823326111
K10942	neg_1804	-0.86978143453598
K06311	neg_1804	-0.884146332740784
K02919	neg_1804	-0.899700224399567
K08714	neg_1852	0.906692802906036
K01159	neg_1852	0.856668412685394
K03470	neg_1852	0.844162285327911
K07391	neg_1852	0.806643962860107
K04061	neg_1852	-0.83790922164917
K03524	neg_1852	0.844162285327911
K07126	neg_1852	0.800390899181366
K06167	neg_1852	0.844162285327911
K06285	neg_1852	-0.81915009021759
K02852	neg_1852	0.856668412685394
K04565	neg_1852	0.831656157970428
K07139	neg_1852	0.937958121299744
K05787	neg_1852	0.956717252731323
K00059	neg_1852	0.844162285327911
K08688	neg_1852	0.806643962860107
K03643	neg_1852	0.831656157970428
K06179	neg_1852	0.856668412685394
K06926	neg_1852	0.90043979883194
K00783	neg_1852	0.869174480438232
K03101	neg_1852	0.81915009021759
K11068	neg_1852	0.894186735153198
K05851	neg_1852	-0.800000011920929
K14575	neg_1852	0.903180837631226
K03584	neg_1852	0.800390899181366
K14051	neg_1852	0.90172153711319
K09951	neg_1852	0.831656157970428
K08714	neg_1863	0.890909075737
K01159	neg_1863	0.878787875175476
K04061	neg_1863	-0.806060612201691
K07126	neg_1863	0.842424213886261
K12543	neg_1863	-0.842424213886261
K07031	neg_1863	-0.903030276298523
K07139	neg_1863	0.818181812763214
K05787	neg_1863	0.854545474052429
K00059	neg_1863	0.830303013324738
K00588	neg_1863	-0.889637529850006
K06926	neg_1863	0.866666674613953
K09512	neg_1863	0.821065366268158
K18298	neg_1863	-0.806060612201691
K14051	neg_1863	0.826174378395081
K00057	neg_1863	0.818181812763214
K01060	neg_1886	0.854545474052429
K04069	neg_1886	0.830303013324738
K09779	neg_1886	0.806060612201691
K07166	neg_1886	0.806060612201691
K13798	neg_1886	-0.806060612201691
K12231	neg_1886	-0.819346487522125
K13611	neg_1886	-0.833995580673218
K07720	neg_1886	0.842424213886261
K10578	neg_1886	-0.873969614505768
K04486	neg_1886	0.878787875175476
K03724	neg_1886	0.854545474052429
K08688	neg_1901	0.878787875175476
K07043	neg_1901	0.830303013324738
K08302	neg_1901	0.866666674613953
K07031	neg_193	-0.866666674613953
K21029	neg_193	-0.866666674613953
K09512	neg_193	0.833995580673218
K11933	neg_1993	-0.840554058551788
K00817	neg_1993	0.854545474052429
K02745	neg_1993	-0.806060612201691
K04565	neg_1993	0.842424213886261
K21217	neg_1993	-0.805690705776215
K18692	neg_1993	-0.842424213886261
K01524	neg_1993	0.927272737026215
K03414	neg_1993	-0.873969614505768
K05851	neg_1993	-0.90043979883194
K10942	neg_1993	-0.873969614505768
K03724	neg_1993	0.818181812763214
K11933	neg_1996	-0.889637529850006
K10237	neg_1996	-0.833995580673218
K02461	neg_1996	-0.881680607795715
K02458	neg_1996	-0.840554058551788
K21217	neg_1996	-0.805690705776215
K19157	neg_1996	0.842424213886261
K18537	neg_1996	-0.854545474052429
K03414	neg_1996	-0.873969614505768
K05802	neg_1996	-0.924506723880768
K05851	neg_1996	-0.800390899181366
K10942	neg_1996	-0.873969614505768
K06311	neg_1996	-0.899700224399567
K02919	neg_1996	-0.878787875175476
K11933	neg_2056	-0.888198733329773
K10237	neg_2056	-0.922830998897552
K04096	neg_2056	0.80374151468277
K02461	neg_2056	-0.879905462265015
K02458	neg_2056	-0.838509321212769
K04565	neg_2056	0.828283190727234
K03607	neg_2056	-0.843286633491516
K02521	neg_2056	-0.816012322902679
K18537	neg_2056	-0.914179265499115
K03414	neg_2056	-0.822550058364868
K10942	neg_2056	-0.822550058364868
K06311	neg_2056	-0.80003410577774
K03724	neg_2056	0.852824926376343
K02919	neg_2056	-0.828283190727234
K11933	neg_2068	-0.840554058551788
K17329	neg_2068	-0.833995580673218
K04061	neg_2068	-0.830303013324738
K04096	neg_2068	0.842424213886261
K00817	neg_2068	0.842424213886261
K19411	neg_2068	0.890909075737
K03412	neg_2068	-0.842424213886261
K06285	neg_2068	-0.890909075737
K04565	neg_2068	0.842424213886261
K03643	neg_2068	0.878787875175476
K06926	neg_2068	0.806060612201691
K13014	neg_2068	0.878787875175476
K01524	neg_2068	0.878787875175476
K03414	neg_2068	-0.819346487522125
K05851	neg_2068	-0.869174480438232
K10942	neg_2068	-0.819346487522125
K14051	neg_2068	0.819346487522125
K11933	neg_207	-0.80374151468277
K01524	neg_207	0.927272737026215
K03414	neg_207	-0.860313832759857
K05802	neg_207	-0.859855890274048
K05851	neg_207	-0.844162285327911
K10942	neg_207	-0.860313832759857
K00845	neg_2109	0.854545474052429
K05946	neg_2109	0.830303013324738
K07099	neg_2109	0.818181812763214
K03827	neg_2109	-0.866666674613953
K03225	neg_2109	-0.830303013324738
K17331	neg_2109	0.873969614505768
K07039	neg_2109	0.890909075737
K00949	neg_2109	0.866666674613953
K15599	neg_2109	-0.806060612201691
K14170	neg_2109	0.806060612201691
K07396	neg_2109	-0.903030276298523
K05985	neg_2109	0.842424213886261
K12231	neg_2109	-0.839830160140991
K05989	neg_2109	0.854545474052429
K09777	neg_2109	0.830303013324738
K16199	neg_2109	0.830303013324738
K15652	neg_2109	0.878787875175476
K04085	neg_2109	-0.830303013324738
K07707	neg_2109	-0.842424213886261
K08714	neg_2116	0.842424213886261
K01060	neg_2116	0.927272737026215
K05946	neg_2116	0.854545474052429
K11933	neg_2116	-0.865095794200897
K07099	neg_2116	0.854545474052429
K07391	neg_2116	0.830303013324738
K10237	neg_2116	-0.821065366268158
K04061	neg_2116	-0.806060612201691
K01714	neg_2116	0.878787875175476
K04096	neg_2116	0.806060612201691
K04069	neg_2116	0.903030276298523
K09779	neg_2116	0.842424213886261
K02745	neg_2116	-0.818181812763214
K07166	neg_2116	0.927272737026215
K00852	neg_2116	0.866666674613953
K03412	neg_2116	-0.806060612201691
K04565	neg_2116	0.842424213886261
K13798	neg_2116	-0.854545474052429
K05787	neg_2116	0.818181812763214
K12231	neg_2116	-0.846658051013947
K01295	neg_2116	0.842424213886261
K18348	neg_2116	0.806060612201691
K13611	neg_2116	-0.808135211467743
K00887	neg_2116	-0.818181812763214
K07720	neg_2116	0.890909075737
K10578	neg_2116	-0.887625336647034
K07493	neg_2116	-0.825403153896332
K04486	neg_2116	0.878787875175476
K14051	neg_2116	0.846658051013947
K03724	neg_2116	0.927272737026215
K07574	neg_2116	0.806060612201691
K17329	neg_2134	-0.859855890274048
K02461	neg_2134	-0.856668412685394
K03651	neg_2134	0.806060612201691
K01814	neg_2134	0.818181812763214
K12072	neg_2134	-0.831656157970428
K00013	neg_2134	0.830303013324738
K02665	neg_2134	-0.805690705776215
K19157	neg_2134	0.806060612201691
K04748	neg_2134	-0.818181812763214
K16014	neg_2134	0.844162285327911
K05802	neg_2134	-0.898646354675293
K06311	neg_2134	-0.808514356613159
K01649	neg_2134	0.830303013324738
K02461	neg_2157	-0.812897026538849
K19157	neg_2157	0.854545474052429
K03414	neg_2157	-0.819346487522125
K05802	neg_2157	-0.924506723880768
K10942	neg_2157	-0.819346487522125
K06311	neg_2157	-0.887542068958282
K02919	neg_2157	-0.806060612201691
K08714	neg_2164	0.806060612201691
K01060	neg_2164	0.878787875175476
K11933	neg_2164	-0.950991809368134
K10237	neg_2164	-0.846925735473633
K03524	neg_2164	0.806060612201691
K01714	neg_2164	0.830303013324738
K04096	neg_2164	0.854545474052429
K04069	neg_2164	0.842424213886261
K00817	neg_2164	0.830303013324738
K06285	neg_2164	-0.806060612201691
K02458	neg_2164	-0.865095794200897
K04565	neg_2164	0.854545474052429
K07031	neg_2164	-0.854545474052429
K21029	neg_2164	-0.830303013324738
K12231	neg_2164	-0.833002269268036
K02521	neg_2164	-0.818181812763214
K00014	neg_2164	0.806060612201691
K18537	neg_2164	-0.903030276298523
K00887	neg_2164	-0.854545474052429
K07720	neg_2164	0.830303013324738
K10578	neg_2164	-0.819346487522125
K05851	neg_2164	-0.81915009021759
K14051	neg_2164	0.887625336647034
K03724	neg_2164	0.866666674613953
K07574	neg_2164	0.806060612201691
K11933	neg_2197	-0.900621116161346
K17329	neg_2197	-0.870471775531769
K10237	neg_2197	-0.831202387809753
K04061	neg_2197	-0.828283190727234
K04096	neg_2197	0.828283190727234
K02461	neg_2197	-0.867244958877563
K07126	neg_2197	0.816012322902679
K03651	neg_2197	0.840554058551788
K04565	neg_2197	0.80374151468277
K02665	neg_2197	-0.8156378865242
K05830	neg_2197	-0.80374151468277
K21217	neg_2197	-0.8156378865242
K06926	neg_2197	0.889637529850006
K19157	neg_2197	0.828283190727234
K04748	neg_2197	-0.80374151468277
K06145	neg_2197	0.80374151468277
K03414	neg_2197	-0.843286633491516
K05802	neg_2197	-0.883561611175537
K05851	neg_2197	-0.848254203796387
K10942	neg_2197	-0.843286633491516
K14051	neg_2197	0.850198805332184
K03724	neg_2197	0.80374151468277
K02919	neg_2197	-0.840554058551788
K06285	neg_2251	-0.866666674613953
K03643	neg_2251	0.927272737026215
K14575	neg_2251	0.857146799564362
K01409	neg_2251	0.818181812763214
K11933	neg_2257	-0.80618816614151
K17329	neg_2257	-0.849503874778748
K02461	neg_2257	-0.853004157543182
K03651	neg_2257	0.808514356613159
K02665	neg_2257	-0.814992010593414
K19157	neg_2257	0.83890962600708
K03414	neg_2257	-0.808143377304077
K05802	neg_2257	-0.914351522922516
K10942	neg_2257	-0.808143377304077
K09512	neg_2257	0.810595333576202
K06311	neg_2257	-0.878048777580261
K02919	neg_2257	-0.814593434333801
K01060	neg_2267	0.890909075737
K05946	neg_2267	0.818181812763214
K09779	neg_2267	0.818181812763214
K07166	neg_2267	0.818181812763214
K04565	neg_2267	0.806060612201691
K13798	neg_2267	-0.830303013324738
K03607	neg_2267	-0.819346487522125
K12231	neg_2267	-0.887625336647034
K20452	neg_2267	-0.865095794200897
K13611	neg_2267	-0.808135211467743
K07720	neg_2267	0.806060612201691
K10578	neg_2267	-0.846658051013947
K04486	neg_2267	0.806060612201691
K11933	neg_2280	-0.849266946315765
K10237	neg_2280	-0.849503874778748
K02461	neg_2280	-0.896908760070801
K03651	neg_2280	0.802435338497162
K02458	neg_2280	-0.80003410577774
K21217	neg_2280	-0.828689396381378
K19157	neg_2280	0.881463050842285
K18537	neg_2280	-0.826751530170441
K16014	neg_2280	0.821643710136414
K03414	neg_2280	-0.883478760719299
K05802	neg_2280	-0.920836269855499
K10942	neg_2280	-0.883478760719299
K06311	neg_2280	-0.896341443061829
K02919	neg_2280	-0.875383973121643
K19157	neg_2282	0.842424213886261
K01524	neg_2282	0.806060612201691
K03414	neg_2282	-0.860313832759857
K05802	neg_2282	-0.937436878681183
K10942	neg_2282	-0.860313832759857
K06311	neg_2282	-0.893621146678925
K02919	neg_2282	-0.806060612201691
K07043	neg_2298	0.842424213886261
K11933	neg_2373	-0.80374151468277
K02461	neg_2373	-0.806643962860107
K21217	neg_2373	-0.805690705776215
K19157	neg_2373	0.806060612201691
K18692	neg_2373	-0.806060612201691
K03414	neg_2373	-0.873969614505768
K05802	neg_2373	-0.885716199874878
K10942	neg_2373	-0.873969614505768
K06311	neg_2373	-0.942253589630127
K05946	neg_2400	0.866666674613953
K01159	neg_2400	0.830303013324738
K04061	neg_2400	-0.890909075737
K01729	neg_2400	0.818181812763214
K09761	neg_2400	0.866666674613953
K04565	neg_2400	0.842424213886261
K07139	neg_2400	0.842424213886261
K05787	neg_2400	0.927272737026215
K20452	neg_2400	-0.901908397674561
K00969	neg_2400	0.806060612201691
K14575	neg_2400	0.802435338497162
K05964	neg_2400	-0.890909075737
K11933	neg_2415	-0.886191606521606
K10237	neg_2415	-0.849503874778748
K04096	neg_2415	0.802435338497162
K02461	neg_2415	-0.896908760070801
K02458	neg_2415	-0.836958706378937
K21217	neg_2415	-0.828689396381378
K19157	neg_2415	0.869304955005646
K18537	neg_2415	-0.83890962600708
K03414	neg_2415	-0.883478760719299
K05802	neg_2415	-0.920836269855499
K05851	neg_2415	-0.815371572971344
K10942	neg_2415	-0.883478760719299
K06311	neg_2415	-0.896341443061829
K02919	neg_2415	-0.887542068958282
K11933	neg_2446	-0.80374151468277
K17329	neg_2446	-0.808135211467743
K02461	neg_2446	-0.894186735153198
K03651	neg_2446	0.842424213886261
K02665	neg_2446	-0.819346487522125
K05830	neg_2446	-0.818181812763214
K21217	neg_2446	-0.846658051013947
K06926	neg_2446	0.830303013324738
K19157	neg_2446	0.939393937587738
K06145	neg_2446	0.806060612201691
K03414	neg_2446	-0.846658051013947
K05802	neg_2446	-0.898646354675293
K10942	neg_2446	-0.846658051013947
K06311	neg_2446	-0.83890962600708
K02919	neg_2446	-0.866666674613953
K07031	neg_2456	-0.806643962860107
K09512	neg_2456	0.953863382339478
K06139	neg_2456	0.825403153896332
K02461	neg_2461	-0.850415349006653
K21217	neg_2461	-0.833002269268036
K19157	neg_2461	0.890909075737
K03414	neg_2461	-0.873969614505768
K05802	neg_2461	-0.924506723880768
K10942	neg_2461	-0.873969614505768
K06311	neg_2461	-0.930095493793488
K02919	neg_2461	-0.854545474052429
K11933	neg_2462	-0.889637529850006
K17329	neg_2462	-0.821065366268158
K10237	neg_2462	-0.885716199874878
K02461	neg_2462	-0.869174480438232
K03651	neg_2462	0.842424213886261
K21217	neg_2462	-0.805690705776215
K19157	neg_2462	0.818181812763214
K04748	neg_2462	-0.818181812763214
K18537	neg_2462	-0.866666674613953
K18692	neg_2462	-0.806060612201691
K06145	neg_2462	0.818181812763214
K03414	neg_2462	-0.873969614505768
K05802	neg_2462	-0.885716199874878
K10942	neg_2462	-0.873969614505768
K06311	neg_2462	-0.863225877285004
K03724	neg_2462	0.854545474052429
K02919	neg_2462	-0.854545474052429
K00845	neg_2485	0.854545474052429
K01060	neg_2485	0.890909075737
K11933	neg_2485	-0.889637529850006
K07099	neg_2485	0.818181812763214
K04075	neg_2485	0.806060612201691
K10237	neg_2485	-0.808135211467743
K01714	neg_2485	0.878787875175476
K04069	neg_2485	0.903030276298523
K00817	neg_2485	0.866666674613953
K07166	neg_2485	0.854545474052429
K00852	neg_2485	0.830303013324738
K04565	neg_2485	0.818181812763214
K13798	neg_2485	-0.842424213886261
K12231	neg_2485	-0.833002269268036
K01295	neg_2485	0.842424213886261
K02521	neg_2485	-0.806060612201691
K00014	neg_2485	0.818181812763214
K13611	neg_2485	-0.821065366268158
K00887	neg_2485	-0.842424213886261
K07720	neg_2485	0.890909075737
K10578	neg_2485	-0.819346487522125
K05851	neg_2485	-0.806643962860107
K04486	neg_2485	0.915151536464691
K14051	neg_2485	0.833002269268036
K03724	neg_2485	0.915151536464691
K07574	neg_2485	0.854545474052429
K06896	neg_2485	0.842424213886261
K01060	neg_2505	0.818181812763214
K11933	neg_2505	-0.926450133323669
K17329	neg_2505	-0.833995580673218
K07391	neg_2505	0.818181812763214
K10237	neg_2505	-0.846925735473633
K04061	neg_2505	-0.878787875175476
K04096	neg_2505	0.903030276298523
K04069	neg_2505	0.842424213886261
K00817	neg_2505	0.830303013324738
K02745	neg_2505	-0.842424213886261
K00852	neg_2505	0.806060612201691
K19411	neg_2505	0.854545474052429
K06285	neg_2505	-0.854545474052429
K04565	neg_2505	0.903030276298523
K03643	neg_2505	0.830303013324738
K06926	neg_2505	0.866666674613953
K01524	neg_2505	0.866666674613953
K03414	neg_2505	-0.860313832759857
K05802	neg_2505	-0.821065366268158
K05851	neg_2505	-0.894186735153198
K10942	neg_2505	-0.860313832759857
K14051	neg_2505	0.860313832759857
K03724	neg_2505	0.830303013324738
K01060	neg_2564	0.890909075737
K11933	neg_2564	-0.840554058551788
K04069	neg_2564	0.830303013324738
K04565	neg_2564	0.830303013324738
K12231	neg_2564	-0.833002269268036
K18537	neg_2564	-0.842424213886261
K07720	neg_2564	0.842424213886261
K10578	neg_2564	-0.819346487522125
K04486	neg_2564	0.854545474052429
K03724	neg_2564	0.854545474052429
K17329	neg_2570	-0.821065366268158
K02461	neg_2570	-0.825403153896332
K03651	neg_2570	0.854545474052429
K02665	neg_2570	-0.833002269268036
K19157	neg_2570	0.903030276298523
K04748	neg_2570	-0.818181812763214
K16014	neg_2570	0.844162285327911
K06145	neg_2570	0.830303013324738
K05802	neg_2570	-0.898646354675293
K06311	neg_2570	-0.851067781448364
K18198	neg_2643	-0.866666674613953
K00640	neg_2643	0.818181812763214
K11933	neg_2643	-0.852824926376343
K17329	neg_2643	-0.821065366268158
K10237	neg_2643	-0.885716199874878
K04096	neg_2643	0.818181812763214
K02461	neg_2643	-0.869174480438232
K03651	neg_2643	0.830303013324738
K21217	neg_2643	-0.805690705776215
K04748	neg_2643	-0.806060612201691
K18537	neg_2643	-0.830303013324738
K06145	neg_2643	0.830303013324738
K03414	neg_2643	-0.873969614505768
K05802	neg_2643	-0.885716199874878
K10942	neg_2643	-0.873969614505768
K06311	neg_2643	-0.924016416072845
K02919	neg_2643	-0.818181812763214
K02745	neg_2684	-0.83890962600708
K01814	neg_2684	0.857146799564362
K12072	neg_2684	-0.834187865257263
K21217	neg_2684	-0.828689396381378
K02747	neg_2684	-0.820672512054443
K02501	neg_2684	0.924016416072845
K18692	neg_2684	-0.857146799564362
K16014	neg_2684	0.834187865257263
K06145	neg_2684	0.826751530170441
K03407	neg_2684	-0.863225877285004
K03414	neg_2684	-0.883478760719299
K10942	neg_2684	-0.883478760719299
K02746	neg_2684	-0.875383973121643
K03724	neg_2684	0.851067781448364
K06305	neg_2684	-0.802435338497162
K01261	neg_2754	0.806060612201691
K20452	neg_2754	-0.828283190727234
K18298	neg_2754	-0.842424213886261
K02491	neg_2754	-0.828283190727234
K08302	neg_2754	0.806060612201691
K05946	neg_2803	0.806060612201691
K01159	neg_2803	0.818181812763214
K04061	neg_2803	-0.915151536464691
K01729	neg_2803	0.842424213886261
K07139	neg_2803	0.842424213886261
K05787	neg_2803	0.927272737026215
K20452	neg_2803	-0.852824926376343
K06926	neg_2803	0.818181812763214
K18298	neg_2803	-0.806060612201691
K05964	neg_2803	-0.878787875175476
K01060	neg_2833	0.830303013324738
K11933	neg_2833	-0.938721001148224
K10237	neg_2833	-0.808135211467743
K03524	neg_2833	0.854545474052429
K04096	neg_2833	0.878787875175476
K04069	neg_2833	0.818181812763214
K09779	neg_2833	0.854545474052429
K00817	neg_2833	0.806060612201691
K02458	neg_2833	-0.877366662025452
K04565	neg_2833	0.866666674613953
K07031	neg_2833	-0.842424213886261
K12231	neg_2833	-0.833002269268036
K01295	neg_2833	0.830303013324738
K01483	neg_2833	-0.818181812763214
K00014	neg_2833	0.818181812763214
K18537	neg_2833	-0.878787875175476
K07720	neg_2833	0.854545474052429
K10578	neg_2833	-0.819346487522125
K05851	neg_2833	-0.806643962860107
K14051	neg_2833	0.873969614505768
K07574	neg_2833	0.842424213886261
K00845	neg_2842	0.806060612201691
K00640	neg_2842	0.806060612201691
K01060	neg_2842	0.830303013324738
K05946	neg_2842	0.866666674613953
K11933	neg_2842	-0.938721001148224
K07099	neg_2842	0.915151536464691
K04075	neg_2842	0.866666674613953
K03470	neg_2842	0.830303013324738
K07391	neg_2842	0.878787875175476
K10237	neg_2842	-0.898646354675293
K04061	neg_2842	-0.818181812763214
K03524	neg_2842	0.903030276298523
K04096	neg_2842	0.975757598876953
K04069	neg_2842	0.915151536464691
K09779	neg_2842	0.890909075737
K00817	neg_2842	0.866666674613953
K07166	neg_2842	0.842424213886261
K00852	neg_2842	0.842424213886261
K19411	neg_2842	0.842424213886261
K00800	neg_2842	0.866666674613953
K06285	neg_2842	-0.866666674613953
K04565	neg_2842	0.951515138149261
K15599	neg_2842	-0.806060612201691
K03643	neg_2842	0.830303013324738
K05985	neg_2842	0.806060612201691
K06926	neg_2842	0.818181812763214
K09777	neg_2842	0.830303013324738
K00859	neg_2842	0.854545474052429
K01295	neg_2842	0.866666674613953
K00849	neg_2842	0.915151536464691
K04517	neg_2842	0.903030276298523
K07720	neg_2842	0.915151536464691
K10578	neg_2842	-0.805690705776215
K03414	neg_2842	-0.826174378395081
K05851	neg_2842	-0.894186735153198
K04486	neg_2842	0.818181812763214
K10942	neg_2842	-0.826174378395081
K01736	neg_2842	0.818181812763214
K07053	neg_2842	0.818181812763214
K09775	neg_2842	0.866666674613953
K03724	neg_2842	0.830303013324738
K16898	neg_2842	0.866666674613953
K17329	neg_286	-0.860478162765503
K10237	neg_286	-0.813785552978516
K02461	neg_286	-0.935483872890472
K03651	neg_286	0.83790922164917
K12072	neg_286	-0.800000011920929
K02665	neg_286	-0.845363914966583
K21217	neg_286	-0.845363914966583
K19157	neg_286	0.925451993942261
K16014	neg_286	0.845161318778992
K06145	neg_286	0.81915009021759
K03414	neg_286	-0.845363914966583
K05802	neg_286	-0.900500416755676
K10942	neg_286	-0.845363914966583
K06311	neg_286	-0.865548312664032
K02919	neg_286	-0.806643962860107
K11933	neg_2886	-0.80374151468277
K17329	neg_2886	-0.808135211467743
K02461	neg_2886	-0.894186735153198
K03651	neg_2886	0.842424213886261
K02665	neg_2886	-0.819346487522125
K05830	neg_2886	-0.818181812763214
K21217	neg_2886	-0.846658051013947
K06926	neg_2886	0.830303013324738
K19157	neg_2886	0.939393937587738
K06145	neg_2886	0.806060612201691
K03414	neg_2886	-0.846658051013947
K05802	neg_2886	-0.898646354675293
K10942	neg_2886	-0.846658051013947
K06311	neg_2886	-0.83890962600708
K02919	neg_2886	-0.866666674613953
K11933	neg_2932	-0.816012322902679
K10237	neg_2932	-0.808135211467743
K02461	neg_2932	-0.875427544116974
K21217	neg_2932	-0.846658051013947
K19157	neg_2932	0.903030276298523
K03414	neg_2932	-0.887625336647034
K05802	neg_2932	-0.911576509475708
K10942	neg_2932	-0.887625336647034
K06311	neg_2932	-0.911858320236206
K02919	neg_2932	-0.854545474052429
K04565	neg_2965	0.808514356613159
K07139	neg_2965	0.802435338497162
K05787	neg_2965	0.875383973121643
K20452	neg_2965	-0.972349107265472
K18298	neg_2965	-0.857146799564362
K03225	neg_2972	-0.842424213886261
K18692	neg_2972	-0.818181812763214
K17329	neg_3064	-0.859855890274048
K02461	neg_3064	-0.919198930263519
K03651	neg_3064	0.866666674613953
K02665	neg_3064	-0.873969614505768
K05830	neg_3064	-0.818181812763214
K21217	neg_3064	-0.846658051013947
K19157	neg_3064	0.963636338710785
K06871	neg_3064	0.830303013324738
K16014	neg_3064	0.81915009021759
K06145	neg_3064	0.842424213886261
K05802	neg_3064	-0.846925735473633
K17329	neg_3088	-0.831202387809753
K02461	neg_3088	-0.879905462265015
K03651	neg_3088	0.877366662025452
K02665	neg_3088	-0.8156378865242
K05830	neg_3088	-0.828283190727234
K21217	neg_3088	-0.8156378865242
K19157	neg_3088	0.914179265499115
K04748	neg_3088	-0.828283190727234
K16014	neg_3088	0.82926344871521
K06145	neg_3088	0.840554058551788
K03414	neg_3088	-0.843286633491516
K05802	neg_3088	-0.922830998897552
K10942	neg_3088	-0.843286633491516
K06311	neg_3088	-0.861575186252594
K02919	neg_3088	-0.852824926376343
K02493	neg_3092	0.818181812763214
K02665	neg_3092	-0.846658051013947
K21217	neg_3092	-0.819346487522125
K03414	neg_3092	-0.805690705776215
K05802	neg_3092	-0.808135211467743
K10942	neg_3092	-0.805690705776215
K07139	neg_3158	0.806060612201691
K05787	neg_3158	0.854545474052429
K20452	neg_3158	-0.865095794200897
K18298	neg_3158	-0.903030276298523
K02461	neg_3198	-0.806643962860107
K01729	neg_3198	0.842424213886261
K04565	neg_3198	0.818181812763214
K02665	neg_3198	-0.833002269268036
K21217	neg_3198	-0.887625336647034
K03643	neg_3198	0.830303013324738
K19157	neg_3198	0.830303013324738
K03414	neg_3198	-0.846658051013947
K05851	neg_3198	-0.850415349006653
K10942	neg_3198	-0.846658051013947
K14575	neg_3198	0.83890962600708
K09951	neg_3198	0.854545474052429
K01060	neg_3351	0.903030276298523
K11933	neg_3351	-0.877366662025452
K10237	neg_3351	-0.846925735473633
K04565	neg_3351	0.830303013324738
K07031	neg_3351	-0.806060612201691
K12231	neg_3351	-0.833002269268036
K18537	neg_3351	-0.951515138149261
K18692	neg_3351	-0.842424213886261
K10578	neg_3351	-0.819346487522125
K02491	neg_3351	-0.852824926376343
K03724	neg_3351	0.842424213886261
K14571	neg_3355	-0.814593434333801
K01483	neg_3355	-0.806060612201691
K02521	neg_3355	-0.830303013324738
K18537	neg_3355	-0.818181812763214
K10578	neg_3355	-0.839830160140991
K19784	neg_3355	-0.816012322902679
K02919	neg_3355	-0.854545474052429
K18198	neg_3360	-0.850415349006653
K17329	neg_3360	-0.900500416755676
K10237	neg_3360	-0.867148578166962
K02461	neg_3360	-0.922580659389496
K03651	neg_3360	0.90043979883194
K12072	neg_3360	-0.83225804567337
K02665	neg_3360	-0.845363914966583
K05830	neg_3360	-0.825403153896332
K21217	neg_3360	-0.845363914966583
K19157	neg_3360	0.875427544116974
K04748	neg_3360	-0.869174480438232
K16014	neg_3360	0.83225804567337
K06145	neg_3360	0.894186735153198
K03414	neg_3360	-0.845363914966583
K05802	neg_3360	-0.860478162765503
K10942	neg_3360	-0.845363914966583
K06311	neg_3360	-0.859276235103607
K11933	neg_3377	-0.852824926376343
K00817	neg_3377	0.818181812763214
K01524	neg_3377	0.842424213886261
K03414	neg_3377	-0.819346487522125
K05802	neg_3377	-0.885716199874878
K05851	neg_3377	-0.83790922164917
K10942	neg_3377	-0.819346487522125
K14051	neg_3377	0.839830160140991
K18198	neg_344	-0.842424213886261
K17329	neg_344	-0.872786045074463
K03470	neg_344	0.842424213886261
K10237	neg_344	-0.885716199874878
K02461	neg_344	-0.956717252731323
K07126	neg_344	0.806060612201691
K06285	neg_344	-0.806060612201691
K09815	neg_344	0.806060612201691
K12543	neg_344	-0.878787875175476
K02665	neg_344	-0.846658051013947
K21217	neg_344	-0.873969614505768
K19157	neg_344	0.818181812763214
K00849	neg_344	0.842424213886261
K06145	neg_344	0.806060612201691
K03414	neg_344	-0.819346487522125
K10942	neg_344	-0.819346487522125
K06311	neg_344	-0.826751530170441
K00057	neg_344	0.806060612201691
K20452	neg_3440	-0.950991809368134
K18298	neg_3440	-0.818181812763214
K02491	neg_3440	-0.80374151468277
K00845	neg_3458	0.830303013324738
K03769	neg_3458	0.806060612201691
K12072	neg_3458	-0.90043979883194
K09815	neg_3458	0.890909075737
K07121	neg_3458	-0.842424213886261
K21217	neg_3458	-0.819346487522125
K16014	neg_3458	0.869174480438232
K03414	neg_3458	-0.833002269268036
K10942	neg_3458	-0.833002269268036
K17329	neg_3496	-0.859855890274048
K02461	neg_3496	-0.856668412685394
K03651	neg_3496	0.842424213886261
K02665	neg_3496	-0.833002269268036
K19157	neg_3496	0.878787875175476
K04748	neg_3496	-0.818181812763214
K06145	neg_3496	0.806060612201691
K05802	neg_3496	-0.898646354675293
K06311	neg_3496	-0.826751530170441
K02919	neg_3496	-0.806060612201691
K11933	neg_3504	-0.826086938381195
K17329	neg_3504	-0.831202387809753
K02461	neg_3504	-0.879905462265015
K03651	neg_3504	0.840554058551788
K02665	neg_3504	-0.8156378865242
K21217	neg_3504	-0.8156378865242
K06926	neg_3504	0.80374151468277
K19157	neg_3504	0.901908397674561
K06145	neg_3504	0.80374151468277
K03414	neg_3504	-0.843286633491516
K05802	neg_3504	-0.922830998897552
K10942	neg_3504	-0.843286633491516
K06311	neg_3504	-0.861575186252594
K02919	neg_3504	-0.865095794200897
K20452	neg_3586	-0.877366662025452
K11933	neg_3592	-0.816012322902679
K10237	neg_3592	-0.833995580673218
K02461	neg_3592	-0.881680607795715
K03651	neg_3592	0.806060612201691
K21217	neg_3592	-0.805690705776215
K19157	neg_3592	0.842424213886261
K18537	neg_3592	-0.818181812763214
K16014	neg_3592	0.844162285327911
K03414	neg_3592	-0.873969614505768
K05802	neg_3592	-0.924506723880768
K10942	neg_3592	-0.873969614505768
K06311	neg_3592	-0.930095493793488
K02919	neg_3592	-0.842424213886261
K17329	neg_3608	-0.831202387809753
K02461	neg_3608	-0.879905462265015
K03651	neg_3608	0.877366662025452
K02665	neg_3608	-0.8156378865242
K05830	neg_3608	-0.828283190727234
K21217	neg_3608	-0.8156378865242
K19157	neg_3608	0.914179265499115
K04748	neg_3608	-0.828283190727234
K16014	neg_3608	0.82926344871521
K06145	neg_3608	0.840554058551788
K03414	neg_3608	-0.843286633491516
K05802	neg_3608	-0.922830998897552
K10942	neg_3608	-0.843286633491516
K06311	neg_3608	-0.861575186252594
K02919	neg_3608	-0.852824926376343
K18198	neg_3609	-0.842424213886261
K11933	neg_3609	-0.901908397674561
K17329	neg_3609	-0.833995580673218
K10237	neg_3609	-0.846925735473633
K04061	neg_3609	-0.830303013324738
K04096	neg_3609	0.854545474052429
K02461	neg_3609	-0.844162285327911
K07126	neg_3609	0.806060612201691
K03651	neg_3609	0.830303013324738
K04565	neg_3609	0.830303013324738
K06926	neg_3609	0.842424213886261
K04748	neg_3609	-0.806060612201691
K18537	neg_3609	-0.806060612201691
K06145	neg_3609	0.806060612201691
K03414	neg_3609	-0.860313832759857
K05802	neg_3609	-0.898646354675293
K05851	neg_3609	-0.806643962860107
K10942	neg_3609	-0.860313832759857
K06311	neg_3609	-0.881463050842285
K02919	neg_3609	-0.866666674613953
K11933	neg_3637	-0.80374151468277
K17329	neg_3637	-0.808135211467743
K02461	neg_3637	-0.894186735153198
K03651	neg_3637	0.842424213886261
K02665	neg_3637	-0.819346487522125
K05830	neg_3637	-0.818181812763214
K21217	neg_3637	-0.846658051013947
K06926	neg_3637	0.830303013324738
K19157	neg_3637	0.939393937587738
K06145	neg_3637	0.806060612201691
K03414	neg_3637	-0.846658051013947
K05802	neg_3637	-0.898646354675293
K10942	neg_3637	-0.846658051013947
K06311	neg_3637	-0.83890962600708
K02919	neg_3637	-0.866666674613953
K11933	neg_3653	-0.865095794200897
K02461	neg_3653	-0.856668412685394
K03651	neg_3653	0.806060612201691
K19157	neg_3653	0.854545474052429
K03414	neg_3653	-0.860313832759857
K05802	neg_3653	-0.937436878681183
K10942	neg_3653	-0.860313832759857
K06311	neg_3653	-0.887542068958282
K02919	neg_3653	-0.890909075737
K11933	neg_3666	-0.852824926376343
K07099	neg_3666	0.842424213886261
K07391	neg_3666	0.818181812763214
K04096	neg_3666	0.878787875175476
K04069	neg_3666	0.903030276298523
K00817	neg_3666	0.939393937587738
K00852	neg_3666	0.878787875175476
K19411	neg_3666	0.890909075737
K00800	neg_3666	0.806060612201691
K06285	neg_3666	-0.842424213886261
K04565	neg_3666	0.830303013324738
K19334	neg_3666	0.818181812763214
K03573	neg_3666	0.866666674613953
K03643	neg_3666	0.842424213886261
K01295	neg_3666	0.818181812763214
K00849	neg_3666	0.830303013324738
K13014	neg_3666	0.806060612201691
K04517	neg_3666	0.830303013324738
K01524	neg_3666	0.806060612201691
K07720	neg_3666	0.842424213886261
K03414	neg_3666	-0.860313832759857
K07043	neg_3666	0.842424213886261
K05851	neg_3666	-0.906692802906036
K10942	neg_3666	-0.860313832759857
K03724	neg_3666	0.806060612201691
K16898	neg_3666	0.806060612201691
K11933	neg_3689	-0.914179265499115
K17329	neg_3689	-0.846925735473633
K10237	neg_3689	-0.872786045074463
K04096	neg_3689	0.854545474052429
K02461	neg_3689	-0.881680607795715
K06285	neg_3689	-0.830303013324738
K02458	neg_3689	-0.852824926376343
K04565	neg_3689	0.854545474052429
K18537	neg_3689	-0.890909075737
K03414	neg_3689	-0.846658051013947
K05802	neg_3689	-0.859855890274048
K05851	neg_3689	-0.81915009021759
K10942	neg_3689	-0.846658051013947
K09512	neg_3689	0.808135211467743
K06311	neg_3689	-0.881463050842285
K00845	neg_3739	0.939393937587738
K00640	neg_3739	0.878787875175476
K07672	neg_3739	0.850415349006653
K07099	neg_3739	0.854545474052429
K03827	neg_3739	-0.975757598876953
K10237	neg_3739	-0.846925735473633
K00100	neg_3739	-0.830303013324738
K01714	neg_3739	0.890909075737
K04069	neg_3739	0.818181812763214
K00852	neg_3739	0.830303013324738
K10907	neg_3739	0.806060612201691
K12072	neg_3739	-0.81915009021759
K09815	neg_3739	0.854545474052429
K07121	neg_3739	-0.866666674613953
K07039	neg_3739	0.878787875175476
K00949	neg_3739	0.806060612201691
K13665	neg_3739	-0.818181812763214
K07396	neg_3739	-0.963636338710785
K12231	neg_3739	-0.833002269268036
K04517	neg_3739	0.830303013324738
K13611	neg_3739	-0.859855890274048
K10953	neg_3739	0.885716199874878
K10578	neg_3739	-0.819346487522125
K07707	neg_3739	-0.806060612201691
K03724	neg_3739	0.830303013324738
K19784	neg_3739	-0.840554058551788
K01661	neg_3739	-0.854545474052429
K02493	neg_3759	0.852824926376343
K02784	neg_3759	0.877366662025452
K03769	neg_3759	0.926450133323669
K17331	neg_3759	0.898584127426147
K19334	neg_3759	0.816012322902679
K13665	neg_3759	-0.828283190727234
K05836	neg_3759	0.816012322902679
K01409	neg_3759	0.840554058551788
K20525	neg_3759	0.852824926376343
K01159	neg_3762	0.806060612201691
K01729	neg_3762	0.806060612201691
K07139	neg_3762	0.806060612201691
K05787	neg_3762	0.878787875175476
K20452	neg_3762	-0.926450133323669
K11068	neg_3762	0.806060612201691
K14575	neg_3762	0.83890962600708
K18298	neg_3762	-0.915151536464691
K09951	neg_3762	0.806060612201691
K08714	neg_3785	0.927272737026215
K12543	neg_3785	-0.818181812763214
K07031	neg_3785	-0.806060612201691
K07139	neg_3785	0.890909075737
K05787	neg_3785	0.890909075737
K00588	neg_3785	-0.852824926376343
K06926	neg_3785	0.830303013324738
K11933	neg_3807	-0.877366662025452
K10237	neg_3807	-0.808135211467743
K02458	neg_3807	-0.889637529850006
K07031	neg_3807	-0.842424213886261
K12231	neg_3807	-0.833002269268036
K02521	neg_3807	-0.842424213886261
K18537	neg_3807	-0.987878799438477
K10578	neg_3807	-0.819346487522125
K09512	neg_3807	0.821065366268158
K02491	neg_3807	-0.816012322902679
K07707	neg_3807	-0.818181812763214
K02919	neg_3807	-0.806060612201691
K18198	neg_3820	-0.806060612201691
K11933	neg_3820	-0.828283190727234
K17329	neg_3820	-0.872786045074463
K02461	neg_3820	-0.831656157970428
K02745	neg_3820	-0.818181812763214
K03651	neg_3820	0.903030276298523
K05830	neg_3820	-0.806060612201691
K19157	neg_3820	0.818181812763214
K04748	neg_3820	-0.903030276298523
K18692	neg_3820	-0.818181812763214
K06145	neg_3820	0.866666674613953
K03414	neg_3820	-0.819346487522125
K05802	neg_3820	-0.885716199874878
K10942	neg_3820	-0.819346487522125
K06311	neg_3820	-0.826751530170441
K03724	neg_3820	0.806060612201691
K02919	neg_3820	-0.818181812763214
K08714	neg_3852	0.854545474052429
K00640	neg_3852	0.806060612201691
K05946	neg_3852	0.939393937587738
K11933	neg_3852	-0.877366662025452
K07099	neg_3852	0.903030276298523
K04075	neg_3852	0.903030276298523
K01159	neg_3852	0.806060612201691
K03470	neg_3852	0.890909075737
K07391	neg_3852	0.951515138149261
K10237	neg_3852	-0.885716199874878
K04061	neg_3852	-0.890909075737
K03524	neg_3852	0.939393937587738
K04096	neg_3852	0.951515138149261
K04069	neg_3852	0.890909075737
K07126	neg_3852	0.818181812763214
K09779	neg_3852	0.927272737026215
K07166	neg_3852	0.915151536464691
K00852	neg_3852	0.830303013324738
K19411	neg_3852	0.818181812763214
K06167	neg_3852	0.842424213886261
K00800	neg_3852	0.854545474052429
K09761	neg_3852	0.890909075737
K04565	neg_3852	0.939393937587738
K13798	neg_3852	-0.830303013324738
K07139	neg_3852	0.866666674613953
K15599	neg_3852	-0.890909075737
K05787	neg_3852	0.890909075737
K03573	neg_3852	0.830303013324738
K03607	neg_3852	-0.805690705776215
K05985	neg_3852	0.854545474052429
K06926	neg_3852	0.890909075737
K00783	neg_3852	0.878787875175476
K09777	neg_3852	0.878787875175476
K00859	neg_3852	0.915151536464691
K01295	neg_3852	0.866666674613953
K03101	neg_3852	0.830303013324738
K01483	neg_3852	-0.842424213886261
K00849	neg_3852	0.903030276298523
K04517	neg_3852	0.878787875175476
K11068	neg_3852	0.806060612201691
K00969	neg_3852	0.866666674613953
K07720	neg_3852	0.903030276298523
K10578	neg_3852	-0.846658051013947
K07043	neg_3852	0.818181812763214
K05970	neg_3852	0.806060612201691
K05851	neg_3852	-0.831656157970428
K04486	neg_3852	0.806060612201691
K01736	neg_3852	0.890909075737
K07053	neg_3852	0.890909075737
K09775	neg_3852	0.866666674613953
K03724	neg_3852	0.806060612201691
K00883	neg_3852	0.842424213886261
K11933	neg_392	-0.865095794200897
K02461	neg_392	-0.856668412685394
K03651	neg_392	0.806060612201691
K19157	neg_392	0.854545474052429
K03414	neg_392	-0.860313832759857
K05802	neg_392	-0.937436878681183
K10942	neg_392	-0.860313832759857
K06311	neg_392	-0.887542068958282
K02919	neg_392	-0.890909075737
K11933	neg_3940	-0.914179265499115
K17329	neg_3940	-0.808135211467743
K10237	neg_3940	-0.911576509475708
K04061	neg_3940	-0.806060612201691
K04096	neg_3940	0.854545474052429
K02461	neg_3940	-0.894186735153198
K03651	neg_3940	0.818181812763214
K02458	neg_3940	-0.816012322902679
K04565	neg_3940	0.866666674613953
K21217	neg_3940	-0.846658051013947
K06926	neg_3940	0.818181812763214
K19157	neg_3940	0.854545474052429
K18537	neg_3940	-0.842424213886261
K03414	neg_3940	-0.887625336647034
K05802	neg_3940	-0.872786045074463
K05851	neg_3940	-0.856668412685394
K10942	neg_3940	-0.887625336647034
K06311	neg_3940	-0.851067781448364
K03724	neg_3940	0.830303013324738
K02919	neg_3940	-0.878787875175476
K01060	neg_410	0.878787875175476
K17329	neg_410	-0.821065366268158
K03412	neg_410	-0.987878799438477
K00931	neg_410	0.842424213886261
K08688	neg_410	0.878787875175476
K07454	neg_410	0.842424213886261
K00887	neg_410	-0.951515138149261
K14051	neg_410	0.846658051013947
K08302	neg_410	0.963636338710785
K00575	neg_410	-0.806060612201691
K00009	neg_410	0.915151536464691
K08714	neg_412	0.866666674613953
K02461	neg_412	-0.881680607795715
K02852	neg_412	0.830303013324738
K05830	neg_412	-0.830303013324738
K07139	neg_412	0.806060612201691
K05787	neg_412	0.818181812763214
K00588	neg_412	-0.852824926376343
K06926	neg_412	0.866666674613953
K19157	neg_412	0.854545474052429
K06871	neg_412	0.806060612201691
K00057	neg_412	0.842424213886261
K14051	neg_416	0.873969614505768
K11933	neg_420	-0.80374151468277
K02461	neg_420	-0.825403153896332
K19157	neg_420	0.842424213886261
K03414	neg_420	-0.860313832759857
K05802	neg_420	-0.937436878681183
K10942	neg_420	-0.860313832759857
K06311	neg_420	-0.942253589630127
K02919	neg_420	-0.842424213886261
K11933	neg_430	-0.863354027271271
K17329	neg_430	-0.831202387809753
K02461	neg_430	-0.879905462265015
K02665	neg_430	-0.8156378865242
K21217	neg_430	-0.8156378865242
K06926	neg_430	0.840554058551788
K19157	neg_430	0.865095794200897
K03414	neg_430	-0.843286633491516
K05802	neg_430	-0.922830998897552
K05851	neg_430	-0.816602885723114
K10942	neg_430	-0.843286633491516
K06311	neg_430	-0.818496406078339
K14051	neg_430	0.801813542842865
K02919	neg_430	-0.852824926376343
K18198	neg_552	-0.854545474052429
K07672	neg_552	0.812897026538849
K17329	neg_552	-0.872786045074463
K03406	neg_552	-0.806060612201691
K02461	neg_552	-0.831656157970428
K02745	neg_552	-0.806060612201691
K03651	neg_552	0.915151536464691
K00013	neg_552	0.806060612201691
K05830	neg_552	-0.830303013324738
K19157	neg_552	0.806060612201691
K04748	neg_552	-0.915151536464691
K16014	neg_552	0.806643962860107
K06145	neg_552	0.890909075737
K03414	neg_552	-0.819346487522125
K05802	neg_552	-0.885716199874878
K10942	neg_552	-0.819346487522125
K06311	neg_552	-0.857146799564362
K00845	neg_64	0.830303013324738
K18198	neg_64	-0.866666674613953
K00640	neg_64	0.806060612201691
K07672	neg_64	0.869174480438232
K01060	neg_64	0.830303013324738
K05946	neg_64	0.866666674613953
K07099	neg_64	0.842424213886261
K03827	neg_64	-0.830303013324738
K10237	neg_64	-0.898646354675293
K03406	neg_64	-0.830303013324738
K04096	neg_64	0.806060612201691
K04069	neg_64	0.818181812763214
K02745	neg_64	-0.854545474052429
K00852	neg_64	0.818181812763214
K03651	neg_64	0.818181812763214
K04565	neg_64	0.830303013324738
K07396	neg_64	-0.830303013324738
K15792	neg_64	0.842424213886261
K16199	neg_64	0.818181812763214
K00344	neg_64	0.818181812763214
K04517	neg_64	0.806060612201691
K04748	neg_64	-0.806060612201691
K10578	neg_64	-0.805690705776215
K06145	neg_64	0.854545474052429
K03414	neg_64	-0.826174378395081
K10942	neg_64	-0.826174378395081
K03724	neg_64	0.830303013324738
K17329	neg_677	-0.821065366268158
K02461	neg_677	-0.844162285327911
K01814	neg_677	0.818181812763214
K12072	neg_677	-0.925451993942261
K09815	neg_677	0.890909075737
K00013	neg_677	0.806060612201691
K07121	neg_677	-0.818181812763214
K02665	neg_677	-0.819346487522125
K06871	neg_677	0.854545474052429
K16014	neg_677	0.881680607795715
K05802	neg_677	-0.808135211467743
K00057	neg_677	0.818181812763214
K01649	neg_677	0.842424213886261
K05946	neg_685	0.866666674613953
K01159	neg_685	0.830303013324738
K04061	neg_685	-0.890909075737
K01729	neg_685	0.818181812763214
K09761	neg_685	0.866666674613953
K04565	neg_685	0.842424213886261
K07139	neg_685	0.842424213886261
K05787	neg_685	0.927272737026215
K20452	neg_685	-0.901908397674561
K00969	neg_685	0.806060612201691
K14575	neg_685	0.802435338497162
K05964	neg_685	-0.890909075737
K01060	neg_71	0.830303013324738
K11933	neg_71	-0.865095794200897
K10237	neg_71	-0.885716199874878
K04096	neg_71	0.842424213886261
K02461	neg_71	-0.800390899181366
K04565	neg_71	0.866666674613953
K03607	neg_71	-0.805690705776215
K18537	neg_71	-0.903030276298523
K06311	neg_71	-0.851067781448364
K07707	neg_71	-0.806060612201691
K11933	neg_726	-0.865095794200897
K02461	neg_726	-0.856668412685394
K03651	neg_726	0.806060612201691
K19157	neg_726	0.854545474052429
K03414	neg_726	-0.860313832759857
K05802	neg_726	-0.937436878681183
K10942	neg_726	-0.860313832759857
K06311	neg_726	-0.887542068958282
K02919	neg_726	-0.890909075737
K11933	neg_727	-0.813664615154266
K17329	neg_727	-0.896651387214661
K10237	neg_727	-0.857381999492645
K04061	neg_727	-0.816012322902679
K02461	neg_727	-0.943208038806915
K01729	neg_727	0.840554058551788
K03651	neg_727	0.840554058551788
K06285	neg_727	-0.816012322902679
K04565	neg_727	0.816012322902679
K02665	neg_727	-0.870935380458832
K21217	neg_727	-0.870935380458832
K03643	neg_727	0.80374151468277
K06926	neg_727	0.828283190727234
K19157	neg_727	0.914179265499115
K06145	neg_727	0.828283190727234
K03414	neg_727	-0.8156378865242
K05802	neg_727	-0.805022776126862
K05851	neg_727	-0.82926344871521
K10942	neg_727	-0.8156378865242
K18298	neg_727	-0.80374151468277
K00057	neg_727	0.816012322902679
K17329	neg_757	-0.846925735473633
K02461	neg_757	-0.881680607795715
K03651	neg_757	0.854545474052429
K02665	neg_757	-0.846658051013947
K05830	neg_757	-0.806060612201691
K21217	neg_757	-0.819346487522125
K06926	neg_757	0.818181812763214
K19157	neg_757	0.927272737026215
K06145	neg_757	0.818181812763214
K03414	neg_757	-0.805690705776215
K05802	neg_757	-0.885716199874878
K10942	neg_757	-0.805690705776215
K06311	neg_757	-0.814593434333801
K02919	neg_757	-0.818181812763214
K00845	neg_758	0.878787875175476
K07672	neg_758	0.825403153896332
K01060	neg_758	0.866666674613953
K05946	neg_758	0.806060612201691
K07099	neg_758	0.806060612201691
K03827	neg_758	-0.866666674613953
K10237	neg_758	-0.885716199874878
K03406	neg_758	-0.818181812763214
K04069	neg_758	0.806060612201691
K02745	neg_758	-0.830303013324738
K00852	neg_758	0.806060612201691
K03225	neg_758	-0.842424213886261
K03651	neg_758	0.806060612201691
K12072	neg_758	-0.800390899181366
K07121	neg_758	-0.806060612201691
K07396	neg_758	-0.854545474052429
K03607	neg_758	-0.805690705776215
K04748	neg_758	-0.818181812763214
K18692	neg_758	-0.854545474052429
K06145	neg_758	0.842424213886261
K17680	neg_758	-0.818181812763214
K07341	neg_758	0.806060612201691
K03724	neg_758	0.854545474052429
K06305	neg_758	-0.806060612201691
K17329	neg_794	-0.885716199874878
K02461	neg_794	-0.931705057621002
K02665	neg_794	-0.887625336647034
K21217	neg_794	-0.833002269268036
K19157	neg_794	0.927272737026215
K05802	neg_794	-0.821065366268158
K15652	neg_826	0.866666674613953
K04075	neg_842	0.818181812763214
K00817	neg_842	0.903030276298523
K02493	neg_842	0.830303013324738
K12072	neg_842	-0.81915009021759
K09815	neg_842	0.842424213886261
K02852	neg_842	0.842424213886261
K02665	neg_842	-0.833002269268036
K21217	neg_842	-0.887625336647034
K03643	neg_842	0.830303013324738
K06871	neg_842	0.806060612201691
K00849	neg_842	0.806060612201691
K03414	neg_842	-0.846658051013947
K05851	neg_842	-0.925451993942261
K10942	neg_842	-0.846658051013947
K11933	neg_861	-0.816012322902679
K10237	neg_861	-0.821065366268158
K02461	neg_861	-0.881680607795715
K03651	neg_861	0.842424213886261
K05830	neg_861	-0.854545474052429
K21217	neg_861	-0.833002269268036
K19157	neg_861	0.890909075737
K16014	neg_861	0.844162285327911
K06145	neg_861	0.806060612201691
K03414	neg_861	-0.873969614505768
K05802	neg_861	-0.924506723880768
K10942	neg_861	-0.873969614505768
K06311	neg_861	-0.832830607891083
K02919	neg_861	-0.866666674613953
K18198	neg_911	-0.854545474052429
K00640	neg_911	0.806060612201691
K11933	neg_911	-0.889637529850006
K17329	neg_911	-0.821065366268158
K10237	neg_911	-0.885716199874878
K04096	neg_911	0.866666674613953
K02461	neg_911	-0.869174480438232
K04565	neg_911	0.842424213886261
K21217	neg_911	-0.805690705776215
K00849	neg_911	0.818181812763214
K18537	neg_911	-0.842424213886261
K03414	neg_911	-0.873969614505768
K05802	neg_911	-0.885716199874878
K10942	neg_911	-0.873969614505768
K06311	neg_911	-0.924016416072845
K02919	neg_911	-0.830303013324738
K00845	neg_919	0.866666674613953
K01060	neg_919	0.866666674613953
K03827	neg_919	-0.866666674613953
K10237	neg_919	-0.859855890274048
K00100	neg_919	-0.806060612201691
K03225	neg_919	-0.866666674613953
K12072	neg_919	-0.800390899181366
K07121	neg_919	-0.830303013324738
K07396	neg_919	-0.866666674613953
K03607	neg_919	-0.833002269268036
K12231	neg_919	-0.846658051013947
K04748	neg_919	-0.806060612201691
K13611	neg_919	-0.808135211467743
K18537	neg_919	-0.854545474052429
K18692	neg_919	-0.842424213886261
K17680	neg_919	-0.830303013324738
K07341	neg_919	0.806060612201691
K02491	neg_919	-0.828283190727234
K03724	neg_919	0.818181812763214
K18198	neg_985	-0.818181812763214
K01060	neg_985	0.842424213886261
K11933	neg_985	-0.852824926376343
K17329	neg_985	-0.872786045074463
K04061	neg_985	-0.878787875175476
K03406	neg_985	-0.830303013324738
K04096	neg_985	0.818181812763214
K02745	neg_985	-0.866666674613953
K19411	neg_985	0.866666674613953
K03412	neg_985	-0.830303013324738
K03651	neg_985	0.842424213886261
K06285	neg_985	-0.854545474052429
K04565	neg_985	0.842424213886261
K03643	neg_985	0.806060612201691
K06926	neg_985	0.818181812763214
K13014	neg_985	0.842424213886261
K04748	neg_985	-0.842424213886261
K18692	neg_985	-0.842424213886261
K01524	neg_985	0.842424213886261
K06145	neg_985	0.842424213886261
K03414	neg_985	-0.819346487522125
K05802	neg_985	-0.808135211467743
K05851	neg_985	-0.812897026538849
K10942	neg_985	-0.819346487522125
K17329	neg_994	-0.924506723880768
K01159	neg_994	0.878787875175476
K03470	neg_994	0.878787875175476
K11754	neg_994	0.830303013324738
K00100	neg_994	-0.842424213886261
K07126	neg_994	0.854545474052429
K00817	neg_994	0.830303013324738
K19411	neg_994	0.878787875175476
K02493	neg_994	0.927272737026215
K02784	neg_994	0.854545474052429
K06285	neg_994	-0.915151536464691
K03769	neg_994	0.915151536464691
K12072	neg_994	-0.844162285327911
K17331	neg_994	0.819346487522125
K09815	neg_994	0.939393937587738
K02852	neg_994	0.842424213886261
K02665	neg_994	-0.887625336647034
K21217	neg_994	-0.833002269268036
K13665	neg_994	-0.903030276298523
K00059	neg_994	0.830303013324738
K03573	neg_994	0.842424213886261
K03643	neg_994	0.903030276298523
K06179	neg_994	0.830303013324738
K02802	neg_994	0.846658051013947
K06926	neg_994	0.806060612201691
K00783	neg_994	0.806060612201691
K03501	neg_994	0.806060612201691
K00849	neg_994	0.854545474052429
K00969	neg_994	0.818181812763214
K05970	neg_994	0.806060612201691
K05851	neg_994	-0.825403153896332
K01409	neg_994	0.903030276298523
K00919	neg_994	0.806060612201691
K00057	neg_994	0.842424213886261
