# Supplementary material for: Multi-omics analyses reveal that the gut microbiome and its metabolites promote milk fat synthesis in Zhongdian yak cows
Source: PeerJ journal article supplement (doi:10.7717/peerj.14444), 2022-12-02
Supplement: neg_biomarker_Web_Report.zip [file treat1_H_L.vs.H_L_module_2.xls]

genusName	metaName	CC
Chloroflexus	neg_1004	-0.856668412685394
Pararhodospirillum	neg_1004	-0.825403153896332
Thermosyntropha	neg_1004	-0.800390899181366
Parafilimonas	neg_1004	0.894186735153198
Emticicia	neg_1062	-0.830303013324738
Lihuaxuella	neg_1109	-0.854545474052429
Izhakiella	neg_1109	-0.924016416072845
Amantichitinum	neg_1109	-0.854545474052429
Candidatus_Arcanobacter	neg_1109	-0.890909075737
Mongoliibacter	neg_1139	-0.878787875175476
Suttonella	neg_1139	0.830303013324738
Litorimonas	neg_1188	-0.830303013324738
Rodentibacter	neg_1188	-0.806060612201691
Candidatus_Sulfopaludibacter	neg_1188	-0.806060612201691
Dolosicoccus	neg_1188	0.806060612201691
Thermopetrobacter	neg_1188	-0.806060612201691
Porticoccus	neg_1188	-0.927272737026215
Lihuaxuella	neg_1354	-0.806060612201691
Candidatus_Sulfopaludibacter	neg_1354	-0.830303013324738
Thermopetrobacter	neg_1354	-0.842424213886261
Thermobifida	neg_136	0.854545474052429
Stappia	neg_136	-0.818181812763214
Anaerotignum	neg_136	0.854545474052429
Erythrobacter	neg_136	-0.842424213886261
Litorimonas	neg_136	-0.806060612201691
Brevinema	neg_136	-0.866666674613953
Pakpunavirus	neg_136	-0.802435338497162
Ottowia	neg_136	0.842424213886261
Zhihengliuella	neg_136	0.830303013324738
Lihuaxuella	neg_136	-0.842424213886261
Rodentibacter	neg_136	-0.854545474052429
Candidatus_Sulfopaludibacter	neg_136	-0.866666674613953
Palleronia	neg_136	0.814593434333801
Marivita	neg_136	0.842424213886261
Acetivibrio	neg_136	0.903030276298523
Turicibacter	neg_136	-0.818181812763214
Dolosicoccus	neg_136	0.830303013324738
Izhakiella	neg_136	-0.820672512054443
Candidatus_Electrothrix	neg_136	-0.806060612201691
Thiodictyon	neg_136	0.842424213886261
Desulfocucumis	neg_136	0.890909075737
Promicromonospora	neg_136	-0.806060612201691
Mudcatvirus	neg_136	-0.830303013324738
Anaerotignum	neg_1401	0.830303013324738
Brevinema	neg_1401	-0.830303013324738
Parapedobacter	neg_1401	-0.878787875175476
Mongoliibacter	neg_1401	-0.842424213886261
Suttonella	neg_1401	0.878787875175476
Limnobacter	neg_1401	-0.851067781448364
Harryflintia	neg_1401	-0.854545474052429
Comamonas	neg_1401	0.842424213886261
Lacinutrix	neg_1401	-0.842424213886261
Candidatus_Symbiobacter	neg_1401	-0.878787875175476
Thermobifida	neg_1413	0.903030276298523
Stappia	neg_1413	-0.854545474052429
Brevinema	neg_1413	-0.866666674613953
Candidatus_Tokpelaia	neg_1413	-0.915151536464691
Haliscomenobacter	neg_1413	-0.890909075737
Suttonella	neg_1413	0.806060612201691
Kordiimonas	neg_1413	-0.818181812763214
Candidatus_Electrothrix	neg_1413	-0.854545474052429
Beggiatoa	neg_1413	-0.842424213886261
Succinimonas	neg_1413	0.830303013324738
Candidatus_Tokpelaia	neg_1432	-0.866666674613953
Haliscomenobacter	neg_1432	-0.842424213886261
Caloramator	neg_1532	-0.903030276298523
Erythrobacter	neg_1532	-0.939393937587738
Kriegella	neg_1532	-0.842424213886261
Litorimonas	neg_1532	-0.806060612201691
Brevinema	neg_1532	-0.866666674613953
Chloroflexus	neg_1532	-0.830303013324738
Candidatus_Moduliflexus	neg_1532	-0.951515138149261
Pakpunavirus	neg_1532	-0.826751530170441
Propionicimonas	neg_1532	-0.808514356613159
Rodentibacter	neg_1532	-0.878787875175476
Candidatus_Sulfopaludibacter	neg_1532	-0.830303013324738
Marivita	neg_1532	0.927272737026215
Acetivibrio	neg_1532	0.806060612201691
Microscilla	neg_1532	-0.830303013324738
Gottschalkia	neg_1532	-0.830303013324738
Lmd1virus	neg_1532	0.806643962860107
Trichormus	neg_1532	0.830303013324738
Comamonas	neg_1532	0.878787875175476
Candidatus_Electrothrix	neg_1532	-0.806060612201691
Cvm10virus	neg_1532	-0.881680607795715
Mudcatvirus	neg_1532	-0.842424213886261
Pacificibacter	neg_1532	-0.818181812763214
Eah2virus	neg_1532	-0.805690705776215
Candidatus_Halobonum	neg_1532	-0.826751530170441
Caloramator	neg_1563	-0.818181812763214
Candidatus_Moduliflexus	neg_1563	-0.890909075737
Pakpunavirus	neg_1563	-0.814593434333801
Candidatus_Sulfopaludibacter	neg_1563	-0.854545474052429
Alkalibacterium	neg_1563	-0.866666674613953
Kordiimonas	neg_1563	-0.830303013324738
Candidatus_Electrothrix	neg_1563	-0.915151536464691
Cvm10virus	neg_1563	-0.894186735153198
Pacificibacter	neg_1563	-0.878787875175476
Metaprevotella	neg_1563	-0.806060612201691
Litorimonas	neg_1717	-0.939393937587738
Zhihengliuella	neg_1717	0.806060612201691
Rodentibacter	neg_1717	-0.818181812763214
Larkinella	neg_1717	-0.939393937587738
Limnobacter	neg_1717	-0.863225877285004
Porticoccus	neg_1717	-0.963636338710785
Rubrivivax	neg_1718	0.906692802906036
Candidatus_Sulfopaludibacter	neg_1727	-0.806060612201691
Thermopetrobacter	neg_1727	-0.818181812763214
Porticoccus	neg_1727	-0.854545474052429
Turicibacter	neg_1737	-0.806060612201691
Lawsonella	neg_176	-0.905779242515564
Halothiobacillus	neg_176	0.854545474052429
Candidatus_Kryptobacter	neg_176	0.842424213886261
Succinimonas	neg_176	0.806060612201691
Mongoliibacter	neg_1874	-0.830303013324738
Rubrivivax	neg_1874	0.806060612201691
Ornithobacterium	neg_1884	-0.806060612201691
Erythrobacter	neg_1998	-0.806060612201691
Pakpunavirus	neg_1998	-0.826751530170441
Thermosyntropha	neg_1998	-0.890909075737
Comamonas	neg_1998	0.866666674613953
Limestonevirus	neg_1998	-0.80374151468277
Altibacter	neg_1998	-0.830303013324738
Marmoricola	neg_2032	0.963636338710785
Erythrobacter	neg_2038	-0.806060612201691
Chloroflexus	neg_2038	-0.939393937587738
Pakpunavirus	neg_2038	-0.936174511909485
Candidatus_Sulfopaludibacter	neg_2038	-0.806060612201691
Thermosyntropha	neg_2038	-0.903030276298523
Methanosphaerula	neg_2038	0.806060612201691
Fimbriimonas	neg_2038	-0.866666674613953
Comamonas	neg_2038	0.806060612201691
Parafilimonas	neg_2038	0.903030276298523
Natronolimnobius	neg_2038	-0.806060612201691
Candidatus_Halobonum	neg_2038	-0.924016416072845
Ktedonobacter	neg_2038	-0.806060612201691
Haliscomenobacter	neg_2264	-0.915151536464691
Zhihengliuella	neg_2264	0.842424213886261
Lawsonella	neg_2264	-0.881463050842285
Halothiobacillus	neg_2264	0.842424213886261
Izhakiella	neg_2264	-0.808514356613159
Succinimonas	neg_2264	0.939393937587738
Candidatus_Sulfopaludibacter	neg_2310	-0.806060612201691
Kordiimonas	neg_2310	-0.806060612201691
Pararhodospirillum	neg_2310	-0.878787875175476
Candidatus_Electrothrix	neg_2310	-0.806060612201691
Thermopetrobacter	neg_2310	-0.854545474052429
Brevinema	neg_2383	-0.806060612201691
Acetivibrio	neg_2383	0.806060612201691
Turicibacter	neg_2383	-0.915151536464691
Erythrobacter	neg_2627	-0.854545474052429
Candidatus_Moduliflexus	neg_2627	-0.878787875175476
Pakpunavirus	neg_2627	-0.887542068958282
Ottowia	neg_2627	0.939393937587738
Propionicimonas	neg_2627	-0.802435338497162
Candidatus_Sulfopaludibacter	neg_2627	-0.927272737026215
Palleronia	neg_2627	0.802435338497162
Alkalibacterium	neg_2627	-0.806060612201691
Microscilla	neg_2627	-0.830303013324738
Novimethylophilus	neg_2627	-0.830303013324738
Gottschalkia	neg_2627	-0.830303013324738
Melissococcus	neg_2627	0.903030276298523
Fimbriimonas	neg_2627	-0.830303013324738
Candidatus_Electrothrix	neg_2627	-0.806060612201691
Methanosalsum	neg_2627	0.854545474052429
Thiodictyon	neg_2627	0.890909075737
Candidatus_Halobonum	neg_2627	-0.83890962600708
Metaprevotella	neg_2627	-0.878787875175476
Thermobifida	neg_2738	0.878787875175476
Stappia	neg_2738	-0.878787875175476
Caloramator	neg_2738	-0.842424213886261
Anaerotignum	neg_2738	0.818181812763214
Lawsonella	neg_2738	-0.83890962600708
Marivita	neg_2738	0.818181812763214
Harryflintia	neg_2738	-0.866666674613953
Candidatus_Sulfotelmatomonas	neg_2738	-0.854545474052429
Desulfocucumis	neg_2738	0.890909075737
Rubrivivax	neg_2788	0.830303013324738
Dethiosulfovibrio	neg_2801	0.818181812763214
Amantichitinum	neg_2801	-0.951515138149261
Thermobifida	neg_2851	0.830303013324738
Chloroflexus	neg_2851	-0.806060612201691
Emticicia	neg_2851	-0.818181812763214
Ornithobacterium	neg_2851	-0.890909075737
Comamonas	neg_2851	0.806060612201691
Thermobifida	neg_2892	0.830303013324738
Haliscomenobacter	neg_2892	-0.830303013324738
Emticicia	neg_2973	-0.818181812763214
Thermopetrobacter	neg_2973	-0.818181812763214
Chloroflexus	neg_302	-0.854545474052429
Pakpunavirus	neg_302	-0.887542068958282
Thermosyntropha	neg_302	-0.915151536464691
Anaerobacterium	neg_302	-0.806060612201691
Fimbriimonas	neg_302	-0.878787875175476
Natronolimnobius	neg_302	-0.842424213886261
Candidatus_Halobonum	neg_302	-0.924016416072845
Ktedonobacter	neg_302	-0.806060612201691
Brevinema	neg_3101	-0.863225877285004
Mongoliibacter	neg_3101	-0.820672512054443
Lmd1virus	neg_3101	0.865548312664032
Turicibacter	neg_3101	-0.826751530170441
Candidatus_Symbiobacter	neg_3101	-0.814593434333801
Rubrivivax	neg_3252	0.854545474052429
Mongoliibacter	neg_3294	-0.866666674613953
Suttonella	neg_3294	0.830303013324738
Limnobacter	neg_3294	-0.893621146678925
Synergistes	neg_3294	0.830303013324738
Candidatus_Symbiobacter	neg_3294	-0.878787875175476
Synergistes	neg_3362	0.878787875175476
Catenovulum	neg_3414	0.890909075737
Lawsonella	neg_3414	-0.851067781448364
Dethiosulfovibrio	neg_3414	0.866666674613953
Ornithobacterium	neg_3414	-0.878787875175476
Litorimonas	neg_3422	-0.854545474052429
Zhihengliuella	neg_3422	0.890909075737
Rodentibacter	neg_3422	-0.818181812763214
Dolosicoccus	neg_3422	0.866666674613953
Thermopetrobacter	neg_3422	-0.818181812763214
Porticoccus	neg_3422	-0.951515138149261
Haliscomenobacter	neg_3487	-0.878787875175476
Pararhodospirillum	neg_3487	-0.878787875175476
Thermopetrobacter	neg_3487	-0.878787875175476
Succinimonas	neg_3487	0.842424213886261
Erythrobacter	neg_3498	-0.842424213886261
Litorimonas	neg_3498	-0.842424213886261
Brevinema	neg_3498	-0.878787875175476
Marivita	neg_3498	0.830303013324738
Limnobacter	neg_3498	-0.887542068958282
Lmd1virus	neg_3498	0.869174480438232
Synergistes	neg_3498	0.866666674613953
Comamonas	neg_3498	0.842424213886261
Mudcatvirus	neg_3498	-0.806060612201691
Eah2virus	neg_3498	-0.846658051013947
Brevinema	neg_3529	-0.830303013324738
Zhihengliuella	neg_3529	0.866666674613953
Lihuaxuella	neg_3529	-0.806060612201691
Rodentibacter	neg_3529	-0.842424213886261
Candidatus_Sulfopaludibacter	neg_3529	-0.854545474052429
Pararhodospirillum	neg_3529	-0.818181812763214
Dolosicoccus	neg_3529	0.927272737026215
Candidatus_Electrothrix	neg_3529	-0.818181812763214
Thermopetrobacter	neg_3529	-0.915151536464691
Porticoccus	neg_3529	-0.806060612201691
Synergistes	neg_3564	0.854545474052429
Thermoanaerobacter	neg_3566	-0.878787875175476
Trichormus	neg_3566	0.818181812763214
Variovorax	neg_3566	-0.903030276298523
Sinirhodobacter	neg_3587	0.806060612201691
Flexilinea	neg_3587	0.842424213886261
Anaerotignum	neg_3656	0.806060612201691
Candidatus_Kryptonium	neg_3656	-0.878787875175476
Ottowia	neg_3656	0.830303013324738
Melissococcus	neg_3656	0.842424213886261
Thiodictyon	neg_3656	0.878787875175476
Promicromonospora	neg_3656	-0.806060612201691
Leminorella	neg_3656	0.818181812763214
Litorimonas	neg_3705	-0.806060612201691
Haliscomenobacter	neg_3705	-0.806060612201691
Porticoccus	neg_3705	-0.854545474052429
Succinimonas	neg_3705	0.806060612201691
Lmd1virus	neg_3723	0.806643962860107
Beggiatoa	neg_3889	-0.915151536464691
Palleronia	neg_497	0.808514356613159
Limnobacter	neg_497	-0.851067781448364
Izhakiella	neg_497	-0.869304955005646
Brevinema	neg_560	-0.830303013324738
Mycolicibacter	neg_560	0.842424213886261
Candidatus_Moduliflexus	neg_560	-0.915151536464691
Marivita	neg_560	0.842424213886261
Comamonas	neg_560	0.878787875175476
Anoxybacillus	neg_560	-0.830303013324738
Cvm10virus	neg_560	-0.90043979883194
Brevinema	neg_580	-0.830303013324738
Rodentibacter	neg_580	-0.806060612201691
Candidatus_Sulfopaludibacter	neg_580	-0.806060612201691
Dolosicoccus	neg_580	0.854545474052429
Candidatus_Electrothrix	neg_580	-0.806060612201691
Thermopetrobacter	neg_580	-0.806060612201691
Thermobifida	neg_59	0.830303013324738
Stappia	neg_59	-0.830303013324738
Anaerotignum	neg_59	0.890909075737
Erythrobacter	neg_59	-0.854545474052429
Brevinema	neg_59	-0.818181812763214
Pakpunavirus	neg_59	-0.802435338497162
Ottowia	neg_59	0.854545474052429
Zhihengliuella	neg_59	0.818181812763214
Lihuaxuella	neg_59	-0.866666674613953
Rodentibacter	neg_59	-0.866666674613953
Candidatus_Sulfopaludibacter	neg_59	-0.854545474052429
Palleronia	neg_59	0.851067781448364
Marivita	neg_59	0.818181812763214
Acetivibrio	neg_59	0.890909075737
Dolosicoccus	neg_59	0.806060612201691
Izhakiella	neg_59	-0.863225877285004
Thiodictyon	neg_59	0.818181812763214
Desulfocucumis	neg_59	0.903030276298523
Promicromonospora	neg_59	-0.818181812763214
Mudcatvirus	neg_59	-0.842424213886261
Candidatus_Arcanobacter	neg_59	-0.806060612201691
Zhihengliuella	neg_637	0.866666674613953
Dolosicoccus	neg_637	0.878787875175476
Thermopetrobacter	neg_637	-0.878787875175476
Lawsonella	neg_675	-0.844988703727722
Variovorax	neg_675	-0.830303013324738
Litorimonas	neg_708	-0.806060612201691
Porticoccus	neg_708	-0.915151536464691
Mycolicibacter	neg_763	0.818181812763214
Cvm10virus	neg_763	-0.806643962860107
Beggiatoa	neg_763	-0.878787875175476
Catenovulum	neg_769	0.903030276298523
Kriegella	neg_769	-0.951515138149261
Parapedobacter	neg_769	-0.830303013324738
Propionicimonas	neg_769	-0.911858320236206
Microscilla	neg_769	-0.842424213886261
Limnobacter	neg_769	-0.911858320236206
Thermoanaerobacter	neg_769	-0.890909075737
Jiangella	neg_769	-0.818181812763214
Negativicoccus	neg_769	0.818181812763214
Acidaminobacter	neg_769	-0.818181812763214
Trichormus	neg_769	0.842424213886261
Sideroxydans	neg_769	0.878787875175476
Mailhella	neg_769	0.818181812763214
Synergistes	neg_769	0.903030276298523
Flexilinea	neg_769	0.818181812763214
Eah2virus	neg_769	-0.846658051013947
Mongoliibacter	neg_771	-0.915151536464691
Candidatus_Symbiobacter	neg_771	-0.842424213886261
Thermobifida	neg_781	0.818181812763214
Stappia	neg_781	-0.818181812763214
Anaerotignum	neg_781	0.866666674613953
Ottowia	neg_781	0.842424213886261
Haliscomenobacter	neg_781	-0.806060612201691
Lihuaxuella	neg_781	-0.939393937587738
Rodentibacter	neg_781	-0.818181812763214
Candidatus_Sulfopaludibacter	neg_781	-0.878787875175476
Palleronia	neg_781	0.814593434333801
Acetivibrio	neg_781	0.806060612201691
Melghirimyces	neg_781	-0.806060612201691
Dolosicoccus	neg_781	0.806060612201691
Izhakiella	neg_781	-0.899700224399567
Thermopetrobacter	neg_781	-0.806060612201691
Desulfocucumis	neg_781	0.854545474052429
Succinimonas	neg_781	0.806060612201691
Candidatus_Arcanobacter	neg_781	-0.878787875175476
Brevinema	neg_783	-0.878787875175476
Candidatus_Tokpelaia	neg_783	-0.830303013324738
Candidatus_Sulfopaludibacter	neg_783	-0.818181812763214
Kordiimonas	neg_783	-0.866666674613953
Dolosicoccus	neg_783	0.806060612201691
Candidatus_Electrothrix	neg_783	-0.915151536464691
Rubrivivax	neg_783	0.806060612201691
Stappia	neg_84	-0.806060612201691
Anaerotignum	neg_84	0.818181812763214
Candidatus_Kryptonium	neg_84	-0.818181812763214
Haliscomenobacter	neg_84	-0.818181812763214
Lawsonella	neg_84	-0.942253589630127
Palleronia	neg_84	0.826751530170441
Dethiosulfovibrio	neg_84	0.806060612201691
Izhakiella	neg_84	-0.857146799564362
Succinimonas	neg_84	0.866666674613953
Amantichitinum	neg_84	-0.842424213886261
Candidatus_Tokpelaia	neg_846	-0.808135211467743
Zhihengliuella	neg_846	0.808135211467743
Rodentibacter	neg_846	-0.821065366268158
Candidatus_Sulfopaludibacter	neg_846	-0.846925735473633
Kordiimonas	neg_846	-0.859855890274048
Pararhodospirillum	neg_846	-0.898646354675293
Dolosicoccus	neg_846	0.846925735473633
Candidatus_Electrothrix	neg_846	-0.859855890274048
Thermopetrobacter	neg_846	-0.924506723880768
Thermobifida	neg_94	0.818181812763214
Stappia	neg_94	-0.818181812763214
Anaerotignum	neg_94	0.866666674613953
Ottowia	neg_94	0.842424213886261
Haliscomenobacter	neg_94	-0.806060612201691
Lihuaxuella	neg_94	-0.939393937587738
Rodentibacter	neg_94	-0.818181812763214
Candidatus_Sulfopaludibacter	neg_94	-0.878787875175476
Palleronia	neg_94	0.814593434333801
Acetivibrio	neg_94	0.806060612201691
Melghirimyces	neg_94	-0.806060612201691
Dolosicoccus	neg_94	0.806060612201691
Izhakiella	neg_94	-0.899700224399567
Thermopetrobacter	neg_94	-0.806060612201691
Desulfocucumis	neg_94	0.854545474052429
Succinimonas	neg_94	0.806060612201691
Candidatus_Arcanobacter	neg_94	-0.878787875175476
