# Supplementary material for: Multi-omics analyses reveal that the gut microbiome and its metabolites promote milk fat synthesis in Zhongdian yak cows
Source: PeerJ journal article supplement (doi:10.7717/peerj.14444), 2022-12-02
Supplement: neg_biomarker_Web_Report.zip [file treat1_H_L.vs.H_L_module_2.xls]

GenesName	metaName	CC
K01814	neg_1004	-0.812897026538849
K12072	neg_1004	0.854838728904724
K09815	neg_1004	-0.800390899181366
K02665	neg_1004	0.90172153711319
K21217	neg_1004	0.873542726039886
K06871	neg_1004	-0.881680607795715
K16014	neg_1004	-0.806451618671417
K03414	neg_1004	0.817185163497925
K10942	neg_1004	0.817185163497925
K02458	neg_1109	0.816012322902679
K05802	neg_1109	0.821065366268158
K09512	neg_1109	-0.846925735473633
K06311	neg_1109	0.863225877285004
K12543	neg_1139	0.866666674613953
K06139	neg_1139	-0.830303013324738
K00013	neg_1188	-0.830303013324738
K02665	neg_1188	0.846658051013947
K21217	neg_1188	0.819346487522125
K16014	neg_1188	-0.931705057621002
K06145	neg_1188	-0.866666674613953
K03414	neg_1188	0.805690705776215
K10942	neg_1188	0.805690705776215
K16014	neg_1354	-0.919198930263519
K03414	neg_1354	0.819346487522125
K05802	neg_1354	0.846925735473633
K10942	neg_1354	0.819346487522125
K18198	neg_136	0.854545474052429
K17329	neg_136	0.924506723880768
K00100	neg_136	0.818181812763214
K02461	neg_136	0.856668412685394
K07126	neg_136	-0.818181812763214
K03651	neg_136	-0.878787875175476
K09789	neg_136	-0.830303013324738
K02665	neg_136	0.846658051013947
K04748	neg_136	0.890909075737
K06145	neg_136	-0.878787875175476
K05802	neg_136	0.833995580673218
K09512	neg_136	-0.846925735473633
K06311	neg_136	0.83890962600708
K18198	neg_1401	0.866666674613953
K08714	neg_1401	-0.818181812763214
K07672	neg_1401	-0.850415349006653
K03340	neg_1401	-0.842424213886261
K03470	neg_1401	-0.818181812763214
K10237	neg_1401	0.821065366268158
K11754	neg_1401	-0.878787875175476
K02461	neg_1401	0.831656157970428
K07126	neg_1401	-0.866666674613953
K03651	neg_1401	-0.866666674613953
K12543	neg_1401	0.854545474052429
K05830	neg_1401	0.963636338710785
K07454	neg_1401	-0.806060612201691
K06926	neg_1401	-0.830303013324738
K01909	neg_1401	0.818181812763214
K06145	neg_1401	-0.830303013324738
K00057	neg_1401	-0.842424213886261
K08714	neg_1413	-0.842424213886261
K17329	neg_1413	0.898646354675293
K01159	neg_1413	-0.903030276298523
K03470	neg_1413	-0.866666674613953
K04061	neg_1413	0.818181812763214
K04096	neg_1413	-0.806060612201691
K02461	neg_1413	0.850415349006653
K07126	neg_1413	-0.878787875175476
K06285	neg_1413	0.915151536464691
K02852	neg_1413	-0.842424213886261
K04565	neg_1413	-0.806060612201691
K02665	neg_1413	0.839830160140991
K07139	neg_1413	-0.806060612201691
K05787	neg_1413	-0.842424213886261
K00059	neg_1413	-0.878787875175476
K03643	neg_1413	-0.915151536464691
K06179	neg_1413	-0.842424213886261
K06926	neg_1413	-0.903030276298523
K00783	neg_1413	-0.818181812763214
K00849	neg_1413	-0.806060612201691
K11068	neg_1413	-0.866666674613953
K05851	neg_1413	0.831656157970428
K14575	neg_1413	-0.875383973121643
K14051	neg_1413	-0.846658051013947
K01409	neg_1413	-0.806060612201691
K09951	neg_1413	-0.806060612201691
K00057	neg_1413	-0.842424213886261
K08714	neg_1432	-0.806060612201691
K03524	neg_1432	-0.806060612201691
K02461	neg_1432	0.800390899181366
K06285	neg_1432	0.806060612201691
K02852	neg_1432	-0.806060612201691
K04565	neg_1432	-0.818181812763214
K07139	neg_1432	-0.878787875175476
K05787	neg_1432	-0.878787875175476
K03643	neg_1432	-0.866666674613953
K06179	neg_1432	-0.818181812763214
K11068	neg_1432	-0.842424213886261
K05851	neg_1432	0.881680607795715
K14575	neg_1432	-0.936174511909485
K14051	neg_1432	-0.887625336647034
K09951	neg_1432	-0.866666674613953
K18198	neg_1532	0.915151536464691
K07672	neg_1532	-0.919198930263519
K01060	neg_1532	-0.818181812763214
K05946	neg_1532	-0.806060612201691
K17329	neg_1532	0.859855890274048
K03340	neg_1532	-0.830303013324738
K01159	neg_1532	-0.806060612201691
K01261	neg_1532	-0.903030276298523
K00100	neg_1532	0.830303013324738
K04061	neg_1532	0.878787875175476
K03406	neg_1532	0.951515138149261
K07126	neg_1532	-0.818181812763214
K02745	neg_1532	0.915151536464691
K00852	neg_1532	-0.818181812763214
K19411	neg_1532	-0.939393937587738
K03412	neg_1532	0.806060612201691
K03651	neg_1532	-0.927272737026215
K17331	neg_1532	-0.81251859664917
K19334	neg_1532	-0.878787875175476
K01684	neg_1532	-0.818181812763214
K03573	neg_1532	-0.854545474052429
K02747	neg_1532	0.806060612201691
K15520	neg_1532	-0.927272737026215
K13014	neg_1532	-0.854545474052429
K04748	neg_1532	0.927272737026215
K02744	neg_1532	0.806060612201691
K01909	neg_1532	0.830303013324738
K04085	neg_1532	0.806060612201691
K06145	neg_1532	-0.951515138149261
K00230	neg_1532	-0.830303013324738
K08169	neg_1532	0.842424213886261
K01299	neg_1532	0.842424213886261
K07341	neg_1532	-0.806060612201691
K05964	neg_1532	0.806060612201691
K03415	neg_1532	0.854545474052429
K18198	neg_1563	0.830303013324738
K07126	neg_1563	-0.818181812763214
K19411	neg_1563	-0.951515138149261
K02493	neg_1563	-0.854545474052429
K06285	neg_1563	0.806060612201691
K03769	neg_1563	-0.878787875175476
K17331	neg_1563	-0.833002269268036
K19334	neg_1563	-0.939393937587738
K04070	neg_1563	-0.818181812763214
K03573	neg_1563	-0.915151536464691
K15520	neg_1563	-0.806060612201691
K00344	neg_1563	-0.842424213886261
K13014	neg_1563	-0.890909075737
K05970	neg_1563	-0.818181812763214
K00230	neg_1563	-0.806060612201691
K20525	neg_1563	-0.806060612201691
K03651	neg_1717	-0.830303013324738
K12072	neg_1717	0.862921476364136
K02665	neg_1717	0.833002269268036
K21217	neg_1717	0.887625336647034
K19157	neg_1717	-0.818181812763214
K06871	neg_1717	-0.842424213886261
K16014	neg_1717	-0.906692802906036
K06145	neg_1717	-0.878787875175476
K03414	neg_1717	0.846658051013947
K10942	neg_1717	0.846658051013947
K03470	neg_1718	-0.856668412685394
K09761	neg_1718	-0.925451993942261
K00059	neg_1718	-0.806643962860107
K00783	neg_1718	-0.875427544116974
K03501	neg_1718	-0.881680607795715
K01990	neg_1718	-0.83790922164917
K03101	neg_1718	-0.956717252731323
K06287	neg_1718	-0.912945866584778
K11068	neg_1718	-0.894186735153198
K00969	neg_1718	-0.925451993942261
K00945	neg_1718	-0.90043979883194
K03218	neg_1718	-0.856668412685394
K05970	neg_1718	-0.850415349006653
K00981	neg_1718	-0.931705057621002
K03584	neg_1718	-0.906692802906036
K01409	neg_1718	-0.806643962860107
K00919	neg_1718	-0.894186735153198
K02784	neg_1727	-0.818181812763214
K12072	neg_1727	0.81915009021759
K02665	neg_1727	0.826174378395081
K16014	neg_1727	-0.850415349006653
K06145	neg_1727	-0.830303013324738
K20452	neg_1737	0.865095794200897
K18298	neg_1737	0.939393937587738
K11933	neg_176	0.938721001148224
K10237	neg_176	0.808135211467743
K03524	neg_176	-0.806060612201691
K04096	neg_176	-0.830303013324738
K04069	neg_176	-0.806060612201691
K00817	neg_176	-0.830303013324738
K02458	neg_176	0.938721001148224
K03607	neg_176	0.805690705776215
K01483	neg_176	0.818181812763214
K02521	neg_176	0.927272737026215
K00014	neg_176	-0.939393937587738
K18537	neg_176	0.866666674613953
K05851	neg_176	0.812897026538849
K04486	neg_176	-0.806060612201691
K14051	neg_176	-0.826174378395081
K03724	neg_176	-0.830303013324738
K06896	neg_176	-0.903030276298523
K11754	neg_1874	-0.830303013324738
K02784	neg_1874	-0.806060612201691
K00059	neg_1874	-0.830303013324738
K03501	neg_1874	-0.830303013324738
K01990	neg_1874	-0.818181812763214
K03101	neg_1874	-0.830303013324738
K03218	neg_1874	-0.806060612201691
K00852	neg_1998	-0.854545474052429
K10907	neg_1998	-0.842424213886261
K00297	neg_1998	-0.818181812763214
K01814	neg_1998	-0.818181812763214
K02747	neg_1998	0.878787875175476
K07454	neg_1998	-0.842424213886261
K18348	neg_1998	-0.830303013324738
K03660	neg_1998	-0.854545474052429
K03407	neg_1998	0.890909075737
K01191	neg_1998	-0.818181812763214
K01151	neg_1998	-0.830303013324738
K07039	neg_2032	-0.830303013324738
K07396	neg_2032	0.806060612201691
K00765	neg_2032	-0.854545474052429
K10953	neg_2032	-0.937436878681183
K19784	neg_2032	0.914179265499115
K01661	neg_2032	0.866666674613953
K17329	neg_2038	0.833995580673218
K00100	neg_2038	0.818181812763214
K00817	neg_2038	-0.818181812763214
K10907	neg_2038	-0.878787875175476
K00931	neg_2038	-0.927272737026215
K03769	neg_2038	-0.830303013324738
K01814	neg_2038	-0.951515138149261
K12072	neg_2038	0.919198930263519
K09815	neg_2038	-0.903030276298523
K00013	neg_2038	-0.842424213886261
K07121	neg_2038	0.854545474052429
K13665	neg_2038	0.806060612201691
K07454	neg_2038	-0.806060612201691
K06871	neg_2038	-0.830303013324738
K02778	neg_2038	0.854545474052429
K03407	neg_2038	0.915151536464691
K05836	neg_2038	-0.806060612201691
K00009	neg_2038	-0.878787875175476
K01649	neg_2038	-0.830303013324738
K11933	neg_2264	0.865095794200897
K10237	neg_2264	0.821065366268158
K04096	neg_2264	-0.806060612201691
K02461	neg_2264	0.912945866584778
K02458	neg_2264	0.865095794200897
K04565	neg_2264	-0.806060612201691
K21217	neg_2264	0.873969614505768
K19157	neg_2264	-0.854545474052429
K03414	neg_2264	0.873969614505768
K05802	neg_2264	0.872786045074463
K05851	neg_2264	0.894186735153198
K10942	neg_2264	0.873969614505768
K06311	neg_2264	0.802435338497162
K02493	neg_2310	-0.927272737026215
K02784	neg_2310	-0.830303013324738
K03769	neg_2310	-0.878787875175476
K19334	neg_2310	-0.806060612201691
K02665	neg_2310	0.826174378395081
K01409	neg_2310	-0.842424213886261
K00919	neg_2310	-0.806060612201691
K20525	neg_2310	-0.842424213886261
K01261	neg_2383	-0.866666674613953
K09789	neg_2383	-0.818181812763214
K20452	neg_2383	0.816012322902679
K18298	neg_2383	0.878787875175476
K02491	neg_2383	0.889637529850006
K06167	neg_26	-0.806060612201691
K02852	neg_26	-0.830303013324738
K15045	neg_26	-0.842424213886261
K03573	neg_26	-0.830303013324738
K07043	neg_26	-0.806060612201691
K05970	neg_26	-0.842424213886261
K02566	neg_26	-0.842424213886261
K01191	neg_26	-0.818181812763214
K00845	neg_2627	-0.818181812763214
K00640	neg_2627	-0.806060612201691
K07672	neg_2627	-0.862921476364136
K17329	neg_2627	0.833995580673218
K03827	neg_2627	0.903030276298523
K01261	neg_2627	-0.842424213886261
K00100	neg_2627	0.890909075737
K19411	neg_2627	-0.818181812763214
K03225	neg_2627	0.866666674613953
K10907	neg_2627	-0.842424213886261
K03769	neg_2627	-0.890909075737
K17331	neg_2627	-0.873969614505768
K09815	neg_2627	-0.842424213886261
K19334	neg_2627	-0.878787875175476
K09789	neg_2627	-0.866666674613953
K07121	neg_2627	0.903030276298523
K07039	neg_2627	-0.842424213886261
K13665	neg_2627	0.903030276298523
K07396	neg_2627	0.818181812763214
K00344	neg_2627	-0.806060612201691
K04748	neg_2627	0.806060612201691
K02778	neg_2627	0.842424213886261
K15652	neg_2627	-0.842424213886261
K20885	neg_2627	-0.806060612201691
K04085	neg_2627	0.927272737026215
K00230	neg_2627	-0.866666674613953
K07341	neg_2627	-0.830303013324738
K05836	neg_2627	-0.927272737026215
K11933	neg_2738	0.840554058551788
K17329	neg_2738	0.859855890274048
K04061	neg_2738	0.830303013324738
K07126	neg_2738	-0.842424213886261
K19411	neg_2738	-0.806060612201691
K03651	neg_2738	-0.854545474052429
K05830	neg_2738	0.818181812763214
K00588	neg_2738	0.80374151468277
K07454	neg_2738	-0.854545474052429
K06926	neg_2738	-0.890909075737
K04748	neg_2738	0.854545474052429
K00887	neg_2738	0.842424213886261
K05802	neg_2738	0.808135211467743
K14051	neg_2738	-0.839830160140991
K02919	neg_2738	0.806060612201691
K02784	neg_2788	-0.806060612201691
K09761	neg_2788	-0.854545474052429
K01990	neg_2788	-0.806060612201691
K00969	neg_2788	-0.842424213886261
K01809	neg_2788	-0.903030276298523
K00945	neg_2788	-0.818181812763214
K05970	neg_2788	-0.878787875175476
K05964	neg_2788	0.854545474052429
K02458	neg_2801	0.840554058551788
K07031	neg_2801	0.830303013324738
K21029	neg_2801	0.806060612201691
K18537	neg_2801	0.866666674613953
K09512	neg_2801	-0.859855890274048
K02919	neg_2801	0.830303013324738
K08714	neg_2851	-0.818181812763214
K11754	neg_2851	-0.842424213886261
K00100	neg_2851	0.842424213886261
K00297	neg_2851	-0.818181812763214
K00765	neg_2851	-0.830303013324738
K06179	neg_2851	-0.818181812763214
K07454	neg_2851	-0.890909075737
K06871	neg_2851	-0.878787875175476
K00848	neg_2851	-0.830303013324738
K00057	neg_2851	-0.939393937587738
K01649	neg_2851	-0.818181812763214
K02461	neg_2892	0.806643962860107
K00588	neg_2892	0.828283190727234
K09512	neg_2892	-0.846925735473633
K06871	neg_2973	-0.866666674613953
K10907	neg_302	-0.939393937587738
K00931	neg_302	-0.903030276298523
K01814	neg_302	-0.939393937587738
K12072	neg_302	0.831656157970428
K09815	neg_302	-0.818181812763214
K00013	neg_302	-0.830303013324738
K07121	neg_302	0.818181812763214
K18348	neg_302	-0.806060612201691
K02778	neg_302	0.854545474052429
K02501	neg_302	-0.806060612201691
K00887	neg_302	0.806060612201691
K03407	neg_302	0.927272737026215
K00009	neg_302	-0.842424213886261
K01649	neg_302	-0.806060612201691
K01661	neg_302	0.854545474052429
K04061	neg_3101	0.820672512054443
K01729	neg_3101	-0.820672512054443
K05787	neg_3101	-0.802435338497162
K00588	neg_3101	0.818496406078339
K18298	neg_3101	0.899700224399567
K11754	neg_3252	-0.818181812763214
K06167	neg_3252	-0.903030276298523
K01729	neg_3252	-0.854545474052429
K02852	neg_3252	-0.890909075737
K05787	neg_3252	-0.806060612201691
K00783	neg_3252	-0.818181812763214
K14575	neg_3252	-0.832830607891083
K09951	neg_3252	-0.806060612201691
K12543	neg_3294	0.830303013324738
K08714	neg_3414	-0.963636338710785
K11933	neg_3414	0.865095794200897
K04075	neg_3414	-0.854545474052429
K03470	neg_3414	-0.818181812763214
K07391	neg_3414	-0.830303013324738
K10237	neg_3414	0.846925735473633
K03524	neg_3414	-0.854545474052429
K01714	neg_3414	-0.878787875175476
K04096	neg_3414	-0.806060612201691
K04069	neg_3414	-0.806060612201691
K07166	neg_3414	-0.878787875175476
K06167	neg_3414	-0.806060612201691
K04565	neg_3414	-0.818181812763214
K13798	neg_3414	0.854545474052429
K07031	neg_3414	0.854545474052429
K07139	neg_3414	-0.878787875175476
K05787	neg_3414	-0.866666674613953
K03607	neg_3414	0.846658051013947
K12231	neg_3414	0.873969614505768
K00765	neg_3414	-0.806060612201691
K06179	neg_3414	-0.866666674613953
K00783	neg_3414	-0.842424213886261
K01483	neg_3414	0.842424213886261
K00014	neg_3414	-0.806060612201691
K10578	neg_3414	0.833002269268036
K14051	neg_3414	-0.873969614505768
K03724	neg_3414	-0.830303013324738
K07574	neg_3414	-0.854545474052429
K00057	neg_3414	-0.842424213886261
K02461	neg_3422	0.83790922164917
K02665	neg_3422	0.846658051013947
K21217	neg_3422	0.873969614505768
K19157	neg_3422	-0.927272737026215
K16014	neg_3422	-0.931705057621002
K03414	neg_3422	0.833002269268036
K05802	neg_3422	0.859855890274048
K10942	neg_3422	0.833002269268036
K06311	neg_3422	0.863225877285004
K02461	neg_3487	0.844162285327911
K02665	neg_3487	0.826174378395081
K18198	neg_3498	0.830303013324738
K07672	neg_3498	-0.850415349006653
K17329	neg_3498	0.821065366268158
K01261	neg_3498	-0.903030276298523
K00100	neg_3498	0.878787875175476
K04061	neg_3498	0.830303013324738
K03406	neg_3498	0.818181812763214
K01729	neg_3498	-0.806060612201691
K03651	neg_3498	-0.939393937587738
K05830	neg_3498	0.818181812763214
K07454	neg_3498	-0.806060612201691
K04748	neg_3498	0.927272737026215
K02744	neg_3498	0.830303013324738
K01909	neg_3498	0.903030276298523
K06145	neg_3498	-0.903030276298523
K05964	neg_3498	0.854545474052429
K18198	neg_3529	0.830303013324738
K02461	neg_3529	0.812897026538849
K02665	neg_3529	0.873969614505768
K21217	neg_3529	0.846658051013947
K16014	neg_3529	-0.806643962860107
K05802	neg_3529	0.808135211467743
K06311	neg_3529	0.851067781448364
K20525	neg_3529	-0.818181812763214
K02784	neg_3564	-0.806060612201691
K03501	neg_3564	-0.818181812763214
K01809	neg_3564	-0.878787875175476
K03218	neg_3564	-0.842424213886261
K07493	neg_3566	0.862921476364136
K20452	neg_3587	0.80374151468277
K00640	neg_3656	-0.818181812763214
K03827	neg_3656	0.854545474052429
K03225	neg_3656	0.806060612201691
K07031	neg_3656	0.866666674613953
K07039	neg_3656	-0.806060612201691
K21029	neg_3656	0.806060612201691
K07396	neg_3656	0.806060612201691
K06907	neg_3656	0.842424213886261
K20885	neg_3656	-0.818181812763214
K04085	neg_3656	0.854545474052429
K09512	neg_3656	-0.885716199874878
K07707	neg_3656	0.854545474052429
K02461	neg_3705	0.83790922164917
K02665	neg_3705	0.846658051013947
K21217	neg_3705	0.873969614505768
K19157	neg_3705	-0.890909075737
K06871	neg_3705	-0.842424213886261
K16014	neg_3705	-0.869174480438232
K03414	neg_3705	0.833002269268036
K05802	neg_3705	0.859855890274048
K10942	neg_3705	0.833002269268036
K19157	neg_3723	-0.818181812763214
K18298	neg_3723	0.830303013324738
K08714	neg_3889	-0.830303013324738
K06167	neg_3889	-0.818181812763214
K02852	neg_3889	-0.878787875175476
K07139	neg_3889	-0.818181812763214
K05787	neg_3889	-0.818181812763214
K00588	neg_3889	0.840554058551788
K06926	neg_3889	-0.854545474052429
K14051	neg_3889	-0.826174378395081
K10237	neg_497	0.859855890274048
K02461	neg_497	0.800390899181366
K14571	neg_497	0.820672512054443
K03607	neg_497	0.860313832759857
K18537	neg_497	0.878787875175476
K07707	neg_497	0.806060612201691
K02919	neg_497	0.806060612201691
K18198	neg_560	0.890909075737
K07672	neg_560	-0.887933671474457
K03340	neg_560	-0.927272737026215
K01159	neg_560	-0.830303013324738
K01261	neg_560	-0.818181812763214
K04061	neg_560	0.818181812763214
K07126	neg_560	-0.854545474052429
K19411	neg_560	-0.866666674613953
K02784	neg_560	-0.830303013324738
K17331	neg_560	-0.873969614505768
K09761	neg_560	-0.830303013324738
K19334	neg_560	-0.818181812763214
K01684	neg_560	-0.915151536464691
K03573	neg_560	-0.903030276298523
K15520	neg_560	-0.866666674613953
K05989	neg_560	-0.806060612201691
K08314	neg_560	-0.806060612201691
K01990	neg_560	-0.830303013324738
K00969	neg_560	-0.818181812763214
K20885	neg_560	-0.818181812763214
K01809	neg_560	-0.866666674613953
K00945	neg_560	-0.830303013324738
K06145	neg_560	-0.806060612201691
K05970	neg_560	-0.939393937587738
K00230	neg_560	-0.806060612201691
K08169	neg_560	0.806060612201691
K01299	neg_560	0.842424213886261
K02445	neg_560	-0.842424213886261
K05964	neg_560	0.842424213886261
K02566	neg_560	-0.842424213886261
K18198	neg_580	0.842424213886261
K02493	neg_580	-0.806060612201691
K20525	neg_580	-0.890909075737
K18198	neg_59	0.842424213886261
K17329	neg_59	0.898646354675293
K03827	neg_59	0.806060612201691
K02461	neg_59	0.844162285327911
K03651	neg_59	-0.854545474052429
K09789	neg_59	-0.806060612201691
K02665	neg_59	0.805690705776215
K04748	neg_59	0.878787875175476
K06145	neg_59	-0.854545474052429
K05802	neg_59	0.859855890274048
K09512	neg_59	-0.846925735473633
K06311	neg_59	0.875383973121643
K02461	neg_637	0.844162285327911
K02665	neg_637	0.826174378395081
K19157	neg_637	-0.866666674613953
K06311	neg_637	0.826751530170441
K11933	neg_675	0.852824926376343
K09779	neg_675	-0.842424213886261
K02458	neg_675	0.828283190727234
K07031	neg_675	0.830303013324738
K01295	neg_675	-0.818181812763214
K01483	neg_675	0.854545474052429
K18537	neg_675	0.842424213886261
K07720	neg_675	-0.806060612201691
K14051	neg_675	-0.826174378395081
K07574	neg_675	-0.830303013324738
K19157	neg_681	-0.830303013324738
K09951	neg_681	-0.866666674613953
K02665	neg_708	0.826174378395081
K16014	neg_708	-0.90043979883194
K06145	neg_708	-0.806060612201691
K01159	neg_763	-0.842424213886261
K03470	neg_763	-0.818181812763214
K07391	neg_763	-0.854545474052429
K04061	neg_763	0.890909075737
K03524	neg_763	-0.806060612201691
K07126	neg_763	-0.830303013324738
K06167	neg_763	-0.903030276298523
K09761	neg_763	-0.854545474052429
K02852	neg_763	-0.903030276298523
K15045	neg_763	-0.878787875175476
K07139	neg_763	-0.866666674613953
K05787	neg_763	-0.903030276298523
K00059	neg_763	-0.842424213886261
K03573	neg_763	-0.818181812763214
K08688	neg_763	-0.818181812763214
K06926	neg_763	-0.915151536464691
K00783	neg_763	-0.890909075737
K03101	neg_763	-0.854545474052429
K11068	neg_763	-0.842424213886261
K00969	neg_763	-0.830303013324738
K07043	neg_763	-0.818181812763214
K05970	neg_763	-0.878787875175476
K14575	neg_763	-0.881463050842285
K03584	neg_763	-0.830303013324738
K09951	neg_763	-0.818181812763214
K00845	neg_769	-0.830303013324738
K07672	neg_769	-0.844162285327911
K01060	neg_769	-0.842424213886261
K05946	neg_769	-0.927272737026215
K07099	neg_769	-0.818181812763214
K03340	neg_769	-0.818181812763214
K10237	neg_769	0.859855890274048
K01261	neg_769	-0.830303013324738
K04061	neg_769	0.806060612201691
K01714	neg_769	-0.818181812763214
K04069	neg_769	-0.806060612201691
K07166	neg_769	-0.878787875175476
K00852	neg_769	-0.806060612201691
K09761	neg_769	-0.830303013324738
K04565	neg_769	-0.806060612201691
K13798	neg_769	0.818181812763214
K07396	neg_769	0.854545474052429
K03607	neg_769	0.833002269268036
K12231	neg_769	0.846658051013947
K20452	neg_769	0.80374151468277
K13611	neg_769	0.808135211467743
K00969	neg_769	-0.818181812763214
K10578	neg_769	0.846658051013947
K01299	neg_769	0.854545474052429
K05964	neg_769	0.878787875175476
K03724	neg_769	-0.830303013324738
K18198	neg_781	0.806060612201691
K17329	neg_781	0.859855890274048
K02461	neg_781	0.856668412685394
K02665	neg_781	0.805690705776215
K05802	neg_781	0.898646354675293
K09512	neg_781	-0.833995580673218
K06311	neg_781	0.899700224399567
K18198	neg_783	0.842424213886261
K01159	neg_783	-0.830303013324738
K07126	neg_783	-0.806060612201691
K19411	neg_783	-0.854545474052429
K02493	neg_783	-0.915151536464691
K02784	neg_783	-0.866666674613953
K06285	neg_783	0.818181812763214
K03769	neg_783	-0.866666674613953
K17331	neg_783	-0.846658051013947
K09761	neg_783	-0.818181812763214
K19334	neg_783	-0.830303013324738
K02665	neg_783	0.826174378395081
K03573	neg_783	-0.842424213886261
K03643	neg_783	-0.830303013324738
K13014	neg_783	-0.854545474052429
K06145	neg_783	-0.806060612201691
K05970	neg_783	-0.890909075737
K01409	neg_783	-0.842424213886261
K00919	neg_783	-0.806060612201691
K20525	neg_783	-0.951515138149261
K11933	neg_84	0.938721001148224
K10237	neg_84	0.846925735473633
K03524	neg_84	-0.806060612201691
K04096	neg_84	-0.866666674613953
K02461	neg_84	0.81915009021759
K02458	neg_84	0.950991809368134
K04565	neg_84	-0.830303013324738
K07031	neg_84	0.830303013324738
K03607	neg_84	0.805690705776215
K00849	neg_84	-0.806060612201691
K02521	neg_84	0.854545474052429
K00014	neg_84	-0.830303013324738
K18537	neg_84	0.939393937587738
K02919	neg_84	0.818181812763214
K18198	neg_846	0.821065366268158
K02493	neg_846	-0.924506723880768
K03769	neg_846	-0.808135211467743
K19334	neg_846	-0.821065366268158
K02665	neg_846	0.903162717819214
K21217	neg_846	0.932296991348267
K03643	neg_846	-0.808135211467743
K13014	neg_846	-0.833995580673218
K03414	neg_846	0.888595581054688
K10942	neg_846	0.888595581054688
K20525	neg_846	-0.911576509475708
K18198	neg_94	0.806060612201691
K17329	neg_94	0.859855890274048
K02461	neg_94	0.856668412685394
K02665	neg_94	0.805690705776215
K05802	neg_94	0.898646354675293
K09512	neg_94	-0.833995580673218
K06311	neg_94	0.899700224399567
