# Supplementary material for: Multi-omics analyses reveal that the gut microbiome and its metabolites promote milk fat synthesis in Zhongdian yak cows
Source: PeerJ journal article supplement (doi:10.7717/peerj.14444), 2022-12-02
Supplement: neg_biomarker_Web_Report.zip [file treat1_H_L.vs.H_L_taxonomy_cor_filter.xls]

genusName	metaName	CC	CCP
Chloroflexus	neg_1004	-0.856668412685394	0.00154747182074688
Pararhodospirillum	neg_1004	-0.825403153896332	0.00327420560319291
Thermosyntropha	neg_1004	-0.800390899181366	0.0054162086926719
Parafilimonas	neg_1004	0.894186735153198	0.000481835628326488
Emticicia	neg_1062	-0.830303013324738	0.00294022813612127
Brevinema	neg_1065	0.806060612201691	0.0048620605246823
Candidatus_Sulfopaludibacter	neg_1065	0.842424213886261	0.00222003275351312
Comamonas	neg_1065	-0.830303013324738	0.00294022813612127
Candidatus_Electrothrix	neg_1065	0.818181812763214	0.00381492051076338
Thermopetrobacter	neg_1065	0.830303013324738	0.00294022813612127
Rubrivivax	neg_1065	-0.842424213886261	0.00222003275351312
Lihuaxuella	neg_1109	-0.854545474052429	0.00163680247839526
Izhakiella	neg_1109	-0.924016416072845	0.000132952728702396
Amantichitinum	neg_1109	-0.854545474052429	0.00163680247839526
Candidatus_Arcanobacter	neg_1109	-0.890909075737	0.000542144516154419
Litorimonas	neg_1116	0.806060612201691	0.0048620605246823
Chloroflexus	neg_1116	0.842424213886261	0.00222003275351312
Porticoccus	neg_1116	0.818181812763214	0.00381492051076338
Parafilimonas	neg_1116	-0.866666674613953	0.0011735379121256
Thermobifida	neg_112	-0.83790922164917	0.00247136195299369
Litorimonas	neg_112	0.856668412685394	0.00154747182074688
Haliscomenobacter	neg_112	0.881680607795715	0.000741594922435862
Zhihengliuella	neg_112	-0.894186735153198	0.000481835628326488
Lawsonella	neg_112	0.853004157543182	0.00170395875980178
Rodentibacter	neg_112	0.806643962860107	0.00480744414521128
Izhakiella	neg_112	0.853004157543182	0.00170395875980178
Desulfocucumis	neg_112	-0.800390899181366	0.0054162086926719
Porticoccus	neg_112	0.806643962860107	0.00480744414521128
Succinimonas	neg_112	-0.881680607795715	0.000741594922435862
Mongoliibacter	neg_1139	-0.878787875175476	0.000813862205061078
Suttonella	neg_1139	0.830303013324738	0.00294022813612127
Litorimonas	neg_1188	-0.830303013324738	0.00294022813612127
Rodentibacter	neg_1188	-0.806060612201691	0.0048620605246823
Candidatus_Sulfopaludibacter	neg_1188	-0.806060612201691	0.0048620605246823
Dolosicoccus	neg_1188	0.806060612201691	0.0048620605246823
Thermopetrobacter	neg_1188	-0.806060612201691	0.0048620605246823
Porticoccus	neg_1188	-0.927272737026215	0.000112034447641074
Thermobifida	neg_1307	-0.842424213886261	0.00222003275351312
Stappia	neg_1307	0.806060612201691	0.0048620605246823
Litorimonas	neg_1307	0.830303013324738	0.00294022813612127
Haliscomenobacter	neg_1307	0.806060612201691	0.0048620605246823
Zhihengliuella	neg_1307	-0.830303013324738	0.00294022813612127
Acetivibrio	neg_1307	-0.818181812763214	0.00381492051076338
Harryflintia	neg_1307	0.806060612201691	0.0048620605246823
Desulfocucumis	neg_1307	-0.866666674613953	0.0011735379121256
Succinimonas	neg_1307	-0.806060612201691	0.0048620605246823
Litorimonas	neg_1330	0.828283190727234	0.00307477558489877
Zhihengliuella	neg_1330	-0.914179265499115	0.000213749081869885
Lawsonella	neg_1330	0.80618816614151	0.00485008058916403
Rodentibacter	neg_1330	0.865095794200897	0.00122739260821847
Marivita	neg_1330	-0.816012322902679	0.0039891464803441
Izhakiella	neg_1330	0.843112826347351	0.00218339276204738
Porticoccus	neg_1330	0.80374151468277	0.00508357521208702
Succinimonas	neg_1330	-0.816012322902679	0.0039891464803441
Lihuaxuella	neg_1354	-0.806060612201691	0.0048620605246823
Candidatus_Sulfopaludibacter	neg_1354	-0.830303013324738	0.00294022813612127
Thermopetrobacter	neg_1354	-0.842424213886261	0.00222003275351312
Thermobifida	neg_136	0.854545474052429	0.00163680247839526
Stappia	neg_136	-0.818181812763214	0.00381492051076338
Anaerotignum	neg_136	0.854545474052429	0.00163680247839526
Erythrobacter	neg_136	-0.842424213886261	0.00222003275351312
Litorimonas	neg_136	-0.806060612201691	0.0048620605246823
Brevinema	neg_136	-0.866666674613953	0.0011735379121256
Pakpunavirus	neg_136	-0.802435338497162	0.00521145970824932
Ottowia	neg_136	0.842424213886261	0.00222003275351312
Zhihengliuella	neg_136	0.830303013324738	0.00294022813612127
Lihuaxuella	neg_136	-0.842424213886261	0.00222003275351312
Rodentibacter	neg_136	-0.854545474052429	0.00163680247839526
Candidatus_Sulfopaludibacter	neg_136	-0.866666674613953	0.0011735379121256
Palleronia	neg_136	0.814593434333801	0.00410613103846336
Marivita	neg_136	0.842424213886261	0.00222003275351312
Acetivibrio	neg_136	0.903030276298523	0.000343612565232743
Turicibacter	neg_136	-0.818181812763214	0.00381492051076338
Dolosicoccus	neg_136	0.830303013324738	0.00294022813612127
Izhakiella	neg_136	-0.820672512054443	0.00362170350001234
Candidatus_Electrothrix	neg_136	-0.806060612201691	0.0048620605246823
Thiodictyon	neg_136	0.842424213886261	0.00222003275351312
Desulfocucumis	neg_136	0.890909075737	0.000542144516154419
Promicromonospora	neg_136	-0.806060612201691	0.0048620605246823
Mudcatvirus	neg_136	-0.830303013324738	0.00294022813612127
Thermobifida	neg_1361	-0.830303013324738	0.00294022813612127
Litorimonas	neg_1361	0.903030276298523	0.000343612565232743
Brevinema	neg_1361	0.878787875175476	0.000813862205061078
Chloroflexus	neg_1361	0.830303013324738	0.00294022813612127
Candidatus_Tokpelaia	neg_1361	0.830303013324738	0.00294022813612127
Haliscomenobacter	neg_1361	0.830303013324738	0.00294022813612127
Zhihengliuella	neg_1361	-0.890909075737	0.000542144516154419
Lawsonella	neg_1361	0.802435338497162	0.00521145970824932
Acetivibrio	neg_1361	-0.830303013324738	0.00294022813612127
Limnobacter	neg_1361	0.869304955005646	0.00108698415655106
Lmd1virus	neg_1361	-0.881680607795715	0.000741594922435862
Dolosicoccus	neg_1361	-0.818181812763214	0.00381492051076338
Dactylococcopsis	neg_1361	-0.842424213886261	0.00222003275351312
Porticoccus	neg_1361	0.806060612201691	0.0048620605246823
Eah2virus	neg_1361	0.833002269268036	0.00276710271221536
Lacinutrix	neg_1363	0.939393937587738	5.48405364009241e-05
Thermobifida	neg_1382	-0.842424213886261	0.00222003275351312
Stappia	neg_1382	0.854545474052429	0.00163680247839526
Caloramator	neg_1382	0.818181812763214	0.00381492051076338
Anaerotignum	neg_1382	-0.854545474052429	0.00163680247839526
Erythrobacter	neg_1382	0.830303013324738	0.00294022813612127
Litorimonas	neg_1382	0.830303013324738	0.00294022813612127
Zhihengliuella	neg_1382	-0.806060612201691	0.0048620605246823
Lawsonella	neg_1382	0.869304955005646	0.00108698415655106
Rodentibacter	neg_1382	0.830303013324738	0.00294022813612127
Marivita	neg_1382	-0.818181812763214	0.00381492051076338
Acetivibrio	neg_1382	-0.830303013324738	0.00294022813612127
Harryflintia	neg_1382	0.806060612201691	0.0048620605246823
Izhakiella	neg_1382	0.808514356613159	0.00463528246178302
Candidatus_Sulfotelmatomonas	neg_1382	0.818181812763214	0.00381492051076338
Desulfocucumis	neg_1382	-0.903030276298523	0.000343612565232743
Promicromonospora	neg_1382	0.806060612201691	0.0048620605246823
Mudcatvirus	neg_1382	0.830303013324738	0.00294022813612127
Succinimonas	neg_1382	-0.806060612201691	0.0048620605246823
Anaerotignum	neg_1401	0.830303013324738	0.00294022813612127
Brevinema	neg_1401	-0.830303013324738	0.00294022813612127
Parapedobacter	neg_1401	-0.878787875175476	0.000813862205061078
Mongoliibacter	neg_1401	-0.842424213886261	0.00222003275351312
Suttonella	neg_1401	0.878787875175476	0.000813862205061078
Limnobacter	neg_1401	-0.851067781448364	0.00179112909994994
Harryflintia	neg_1401	-0.854545474052429	0.00163680247839526
Comamonas	neg_1401	0.842424213886261	0.00222003275351312
Lacinutrix	neg_1401	-0.842424213886261	0.00222003275351312
Candidatus_Symbiobacter	neg_1401	-0.878787875175476	0.000813862205061078
Thermobifida	neg_1413	0.903030276298523	0.000343612565232743
Stappia	neg_1413	-0.854545474052429	0.00163680247839526
Brevinema	neg_1413	-0.866666674613953	0.0011735379121256
Candidatus_Tokpelaia	neg_1413	-0.915151536464691	0.000204472206099204
Haliscomenobacter	neg_1413	-0.890909075737	0.000542144516154419
Suttonella	neg_1413	0.806060612201691	0.0048620605246823
Kordiimonas	neg_1413	-0.818181812763214	0.00381492051076338
Candidatus_Electrothrix	neg_1413	-0.854545474052429	0.00163680247839526
Beggiatoa	neg_1413	-0.842424213886261	0.00222003275351312
Succinimonas	neg_1413	0.830303013324738	0.00294022813612127
Candidatus_Tokpelaia	neg_1432	-0.866666674613953	0.0011735379121256
Haliscomenobacter	neg_1432	-0.842424213886261	0.00222003275351312
Catenovulum	neg_1438	-0.818181812763214	0.00381492051076338
Anaerotignum	neg_1438	-0.818181812763214	0.00381492051076338
Kriegella	neg_1438	0.939393937587738	5.48405364009241e-05
Candidatus_Kryptonium	neg_1438	0.842424213886261	0.00222003275351312
Mycolicibacter	neg_1438	-0.806060612201691	0.0048620605246823
Parapedobacter	neg_1438	0.927272737026215	0.000112034447641074
Propionicimonas	neg_1438	0.899700224399567	0.000391673296721073
Palleronia	neg_1438	-0.869304955005646	0.00108698415655106
Sinirhodobacter	neg_1438	-0.890909075737	0.000542144516154419
Microscilla	neg_1438	0.866666674613953	0.0011735379121256
Limnobacter	neg_1438	0.875383973121643	0.00090532610126548
Thermoanaerobacter	neg_1438	0.818181812763214	0.00381492051076338
Jiangella	neg_1438	0.854545474052429	0.00163680247839526
Negativicoccus	neg_1438	-0.806060612201691	0.0048620605246823
Acidaminobacter	neg_1438	0.842424213886261	0.00222003275351312
Sideroxydans	neg_1438	-0.975757598876953	1.46754063035104e-06
Mailhella	neg_1438	-0.915151536464691	0.000204472206099204
Synergistes	neg_1438	-0.854545474052429	0.00163680247839526
Anoxybacillus	neg_1438	0.842424213886261	0.00222003275351312
Flexilinea	neg_1438	-0.927272737026215	0.000112034447641074
Haliscomenobacter	neg_1450	0.846925735473633	0.0019883679465349
Zhihengliuella	neg_1450	-0.833995580673218	0.00270528265085312
Izhakiella	neg_1450	0.849503874778748	0.00186385232781783
Succinimonas	neg_1450	-0.846925735473633	0.0019883679465349
Anaerotignum	neg_1496	-0.915151536464691	0.000204472206099204
Erythrobacter	neg_1496	0.866666674613953	0.0011735379121256
Litorimonas	neg_1496	0.890909075737	0.000542144516154419
Brevinema	neg_1496	0.818181812763214	0.00381492051076338
Parapedobacter	neg_1496	0.830303013324738	0.00294022813612127
Zhihengliuella	neg_1496	-0.866666674613953	0.0011735379121256
Lawsonella	neg_1496	0.826751530170441	0.00317971472634282
Rodentibacter	neg_1496	0.915151536464691	0.000204472206099204
Marivita	neg_1496	-0.830303013324738	0.00294022813612127
Larkinella	neg_1496	0.806060612201691	0.0048620605246823
Limnobacter	neg_1496	0.83890962600708	0.00241398974898654
Harryflintia	neg_1496	0.842424213886261	0.00222003275351312
Trichormus	neg_1496	-0.830303013324738	0.00294022813612127
Izhakiella	neg_1496	0.899700224399567	0.000391673296721073
Desulfocucumis	neg_1496	-0.878787875175476	0.000813862205061078
Porticoccus	neg_1496	0.854545474052429	0.00163680247839526
Succinimonas	neg_1496	-0.830303013324738	0.00294022813612127
Caloramator	neg_1532	-0.903030276298523	0.000343612565232743
Erythrobacter	neg_1532	-0.939393937587738	5.48405364009241e-05
Kriegella	neg_1532	-0.842424213886261	0.00222003275351312
Litorimonas	neg_1532	-0.806060612201691	0.0048620605246823
Brevinema	neg_1532	-0.866666674613953	0.0011735379121256
Chloroflexus	neg_1532	-0.830303013324738	0.00294022813612127
Candidatus_Moduliflexus	neg_1532	-0.951515138149261	2.27985739738035e-05
Pakpunavirus	neg_1532	-0.826751530170441	0.00317971472634282
Propionicimonas	neg_1532	-0.808514356613159	0.00463528246178302
Rodentibacter	neg_1532	-0.878787875175476	0.000813862205061078
Candidatus_Sulfopaludibacter	neg_1532	-0.830303013324738	0.00294022813612127
Marivita	neg_1532	0.927272737026215	0.000112034447641074
Acetivibrio	neg_1532	0.806060612201691	0.0048620605246823
Microscilla	neg_1532	-0.830303013324738	0.00294022813612127
Gottschalkia	neg_1532	-0.830303013324738	0.00294022813612127
Lmd1virus	neg_1532	0.806643962860107	0.00480744414521128
Trichormus	neg_1532	0.830303013324738	0.00294022813612127
Comamonas	neg_1532	0.878787875175476	0.000813862205061078
Candidatus_Electrothrix	neg_1532	-0.806060612201691	0.0048620605246823
Cvm10virus	neg_1532	-0.881680607795715	0.000741594922435862
Mudcatvirus	neg_1532	-0.842424213886261	0.00222003275351312
Pacificibacter	neg_1532	-0.818181812763214	0.00381492051076338
Eah2virus	neg_1532	-0.805690705776215	0.00489692183645341
Candidatus_Halobonum	neg_1532	-0.826751530170441	0.00317971472634282
Caloramator	neg_1563	-0.818181812763214	0.00381492051076338
Candidatus_Moduliflexus	neg_1563	-0.890909075737	0.000542144516154419
Pakpunavirus	neg_1563	-0.814593434333801	0.00410613103846336
Candidatus_Sulfopaludibacter	neg_1563	-0.854545474052429	0.00163680247839526
Alkalibacterium	neg_1563	-0.866666674613953	0.0011735379121256
Kordiimonas	neg_1563	-0.830303013324738	0.00294022813612127
Candidatus_Electrothrix	neg_1563	-0.915151536464691	0.000204472206099204
Cvm10virus	neg_1563	-0.894186735153198	0.000481835628326488
Pacificibacter	neg_1563	-0.878787875175476	0.000813862205061078
Metaprevotella	neg_1563	-0.806060612201691	0.0048620605246823
Anaerotignum	neg_162	-0.866666674613953	0.0011735379121256
Brevinema	neg_162	0.890909075737	0.000542144516154419
Mycolicibacter	neg_162	-0.842424213886261	0.00222003275351312
Parapedobacter	neg_162	0.939393937587738	5.48405364009241e-05
Palleronia	neg_162	-0.802435338497162	0.00521145970824932
Mongoliibacter	neg_162	0.927272737026215	0.000112034447641074
Marivita	neg_162	-0.818181812763214	0.00381492051076338
Suttonella	neg_162	-0.854545474052429	0.00163680247839526
Limnobacter	neg_162	0.83890962600708	0.00241398974898654
Sideroxydans	neg_162	-0.903030276298523	0.000343612565232743
Comamonas	neg_162	-0.806060612201691	0.0048620605246823
Anoxybacillus	neg_162	0.866666674613953	0.0011735379121256
Flexilinea	neg_162	-0.830303013324738	0.00294022813612127
Candidatus_Symbiobacter	neg_162	0.915151536464691	0.000204472206099204
Cvm10virus	neg_162	0.800390899181366	0.0054162086926719
Rodentibacter	neg_1649	0.830303013324738	0.00294022813612127
Marivita	neg_1649	-0.854545474052429	0.00163680247839526
Acetivibrio	neg_1649	-0.939393937587738	5.48405364009241e-05
Dolosicoccus	neg_1649	-0.806060612201691	0.0048620605246823
Mudcatvirus	neg_1649	0.866666674613953	0.0011735379121256
Litorimonas	neg_1717	-0.939393937587738	5.48405364009241e-05
Zhihengliuella	neg_1717	0.806060612201691	0.0048620605246823
Rodentibacter	neg_1717	-0.818181812763214	0.00381492051076338
Larkinella	neg_1717	-0.939393937587738	5.48405364009241e-05
Limnobacter	neg_1717	-0.863225877285004	0.00129381457010247
Porticoccus	neg_1717	-0.963636338710785	7.32099466027591e-06
Rubrivivax	neg_1718	0.906692802906036	0.000295911879524491
Candidatus_Sulfopaludibacter	neg_1727	-0.806060612201691	0.0048620605246823
Thermopetrobacter	neg_1727	-0.818181812763214	0.00381492051076338
Porticoccus	neg_1727	-0.854545474052429	0.00163680247839526
Turicibacter	neg_1737	-0.806060612201691	0.0048620605246823
Lawsonella	neg_176	-0.905779242515564	0.000307323103084567
Halothiobacillus	neg_176	0.854545474052429	0.00163680247839526
Candidatus_Kryptobacter	neg_176	0.842424213886261	0.00222003275351312
Succinimonas	neg_176	0.806060612201691	0.0048620605246823
Stappia	neg_1781	0.878787875175476	0.000813862205061078
Caloramator	neg_1781	0.806060612201691	0.0048620605246823
Candidatus_Kryptonium	neg_1781	0.806060612201691	0.0048620605246823
Candidatus_Tokpelaia	neg_1781	0.806060612201691	0.0048620605246823
Haliscomenobacter	neg_1781	0.818181812763214	0.00381492051076338
Lawsonella	neg_1781	0.97872793674469	8.73146423829851e-07
Palleronia	neg_1781	-0.844988703727722	0.00208579660703911
Halothiobacillus	neg_1781	-0.818181812763214	0.00381492051076338
Variovorax	neg_1781	0.830303013324738	0.00294022813612127
Succinimonas	neg_1781	-0.854545474052429	0.00163680247839526
Beggiatoa	neg_1791	0.927272737026215	0.000112034447641074
Kriegella	neg_1796	0.830303013324738	0.00294022813612127
Candidatus_Kryptonium	neg_1796	0.806060612201691	0.0048620605246823
Candidatus_Moduliflexus	neg_1796	0.866666674613953	0.0011735379121256
Ottowia	neg_1796	-0.818181812763214	0.00381492051076338
Gottschalkia	neg_1796	0.915151536464691	0.000204472206099204
Melissococcus	neg_1796	-0.866666674613953	0.0011735379121256
Methanosalsum	neg_1796	-0.878787875175476	0.000813862205061078
Thiodictyon	neg_1796	-0.890909075737	0.000542144516154419
Metaprevotella	neg_1796	0.818181812763214	0.00381492051076338
Thermobifida	neg_1798	-0.854545474052429	0.00163680247839526
Stappia	neg_1798	0.927272737026215	0.000112034447641074
Caloramator	neg_1798	0.842424213886261	0.00222003275351312
Candidatus_Kryptonium	neg_1798	0.806060612201691	0.0048620605246823
Lawsonella	neg_1798	0.905779242515564	0.000307323103084567
Palleronia	neg_1798	-0.808514356613159	0.00463528246178302
Anaerotignum	neg_1804	-0.83890962600708	0.00241398974898654
Litorimonas	neg_1804	0.83890962600708	0.00241398974898654
Haliscomenobacter	neg_1804	0.820672512054443	0.00362170350001234
Zhihengliuella	neg_1804	-0.863225877285004	0.00129381457010247
Lawsonella	neg_1804	0.878048777580261	0.000833121234763867
Rodentibacter	neg_1804	0.83890962600708	0.00241398974898654
Harryflintia	neg_1804	0.820672512054443	0.00362170350001234
Izhakiella	neg_1804	0.878048777580261	0.000833121234763867
Desulfocucumis	neg_1804	-0.83890962600708	0.00241398974898654
Succinimonas	neg_1804	-0.869304955005646	0.00108698415655106
Brevinema	neg_1852	0.806643962860107	0.00480744414521128
Candidatus_Tokpelaia	neg_1852	0.831656157970428	0.00285249465359505
Lawsonella	neg_1852	0.805963456630707	0.00487119959616233
Beggiatoa	neg_1852	0.906692802906036	0.000295911879524491
Thermobifida	neg_1863	-0.854545474052429	0.00163680247839526
Brevinema	neg_1863	0.818181812763214	0.00381492051076338
Mycolicibacter	neg_1863	-0.806060612201691	0.0048620605246823
Mongoliibacter	neg_1863	0.854545474052429	0.00163680247839526
Turicibacter	neg_1863	0.890909075737	0.000542144516154419
Candidatus_Symbiobacter	neg_1863	0.830303013324738	0.00294022813612127
Beggiatoa	neg_1863	0.854545474052429	0.00163680247839526
Mongoliibacter	neg_1874	-0.830303013324738	0.00294022813612127
Rubrivivax	neg_1874	0.806060612201691	0.0048620605246823
Ornithobacterium	neg_1884	-0.806060612201691	0.0048620605246823
Catenovulum	neg_1886	-0.854545474052429	0.00163680247839526
Kriegella	neg_1886	0.842424213886261	0.00222003275351312
Propionicimonas	neg_1886	0.802435338497162	0.00521145970824932
Thermoanaerobacter	neg_1886	0.890909075737	0.000542144516154419
Acidaminobacter	neg_1886	0.842424213886261	0.00222003275351312
Trichormus	neg_1886	-0.806060612201691	0.0048620605246823
Variovorax	neg_1886	0.951515138149261	2.27985739738035e-05
Anaerobacterium	neg_1901	0.842424213886261	0.00222003275351312
Natribacillus	neg_1901	0.854545474052429	0.00163680247839526
Caldicellulosiruptor	neg_1901	0.806060612201691	0.0048620605246823
Dethiosulfovibrio	neg_193	-0.915151536464691	0.000204472206099204
Candidatus_Sulfotelmatomonas	neg_193	0.830303013324738	0.00294022813612127
Amantichitinum	neg_193	0.878787875175476	0.000813862205061078
Lawsonella	neg_1993	0.851067781448364	0.00179112909994994
Halothiobacillus	neg_1993	-0.818181812763214	0.00381492051076338
Anaerotignum	neg_1996	-0.830303013324738	0.00294022813612127
Litorimonas	neg_1996	0.806060612201691	0.0048620605246823
Haliscomenobacter	neg_1996	0.830303013324738	0.00294022813612127
Zhihengliuella	neg_1996	-0.854545474052429	0.00163680247839526
Lawsonella	neg_1996	0.899700224399567	0.000391673296721073
Rodentibacter	neg_1996	0.818181812763214	0.00381492051076338
Izhakiella	neg_1996	0.899700224399567	0.000391673296721073
Desulfocucumis	neg_1996	-0.806060612201691	0.0048620605246823
Succinimonas	neg_1996	-0.878787875175476	0.000813862205061078
Erythrobacter	neg_1998	-0.806060612201691	0.0048620605246823
Pakpunavirus	neg_1998	-0.826751530170441	0.00317971472634282
Thermosyntropha	neg_1998	-0.890909075737	0.000542144516154419
Comamonas	neg_1998	0.866666674613953	0.0011735379121256
Limestonevirus	neg_1998	-0.80374151468277	0.00508357521208702
Altibacter	neg_1998	-0.830303013324738	0.00294022813612127
Marmoricola	neg_2032	0.963636338710785	7.32099466027591e-06
Erythrobacter	neg_2038	-0.806060612201691	0.0048620605246823
Chloroflexus	neg_2038	-0.939393937587738	5.48405364009241e-05
Pakpunavirus	neg_2038	-0.936174511909485	6.71888372667517e-05
Candidatus_Sulfopaludibacter	neg_2038	-0.806060612201691	0.0048620605246823
Thermosyntropha	neg_2038	-0.903030276298523	0.000343612565232743
Methanosphaerula	neg_2038	0.806060612201691	0.0048620605246823
Fimbriimonas	neg_2038	-0.866666674613953	0.0011735379121256
Comamonas	neg_2038	0.806060612201691	0.0048620605246823
Parafilimonas	neg_2038	0.903030276298523	0.000343612565232743
Natronolimnobius	neg_2038	-0.806060612201691	0.0048620605246823
Candidatus_Halobonum	neg_2038	-0.924016416072845	0.000132952728702396
Ktedonobacter	neg_2038	-0.806060612201691	0.0048620605246823
Anaerotignum	neg_2056	-0.852824926376343	0.00171189540742711
Litorimonas	neg_2056	0.828283190727234	0.00307477558489877
Parapedobacter	neg_2056	0.80374151468277	0.00508357521208702
Haliscomenobacter	neg_2056	0.80374151468277	0.00508357521208702
Zhihengliuella	neg_2056	-0.816012322902679	0.0039891464803441
Lawsonella	neg_2056	0.892345726490021	0.000515068773110805
Rodentibacter	neg_2056	0.80374151468277	0.00508357521208702
Palleronia	neg_2056	-0.849266946315765	0.00187505312445646
Larkinella	neg_2056	0.840554058551788	0.00232177976116144
Limnobacter	neg_2056	0.880037486553192	0.000782041934040523
Izhakiella	neg_2056	0.867729306221008	0.00113809565686207
Succinimonas	neg_2056	-0.840554058551788	0.00232177976116144
Stappia	neg_2068	0.854545474052429	0.00163680247839526
Caloramator	neg_2068	0.915151536464691	0.000204472206099204
Candidatus_Tokpelaia	neg_2068	0.878787875175476	0.000813862205061078
Lawsonella	neg_2068	0.857146799564362	0.0015278405327328
Kordiimonas	neg_2068	0.866666674613953	0.0011735379121256
Anaerobacterium	neg_2068	0.806060612201691	0.0048620605246823
Candidatus_Electrothrix	neg_2068	0.854545474052429	0.00163680247839526
Pacificibacter	neg_2068	0.818181812763214	0.00381492051076338
Lawsonella	neg_207	0.826751530170441	0.00317971472634282
Halothiobacillus	neg_207	-0.806060612201691	0.0048620605246823
Kriegella	neg_2109	0.842424213886261	0.00222003275351312
Candidatus_Kryptonium	neg_2109	0.866666674613953	0.0011735379121256
Parapedobacter	neg_2109	0.806060612201691	0.0048620605246823
Ottowia	neg_2109	-0.842424213886261	0.00222003275351312
Propionicimonas	neg_2109	0.857146799564362	0.0015278405327328
Palleronia	neg_2109	-0.826751530170441	0.00317971472634282
Sinirhodobacter	neg_2109	-0.903030276298523	0.000343612565232743
Microscilla	neg_2109	0.818181812763214	0.00381492051076338
Melghirimyces	neg_2109	0.806060612201691	0.0048620605246823
Marmoricola	neg_2109	-0.806060612201691	0.0048620605246823
Novimethylophilus	neg_2109	0.854545474052429	0.00163680247839526
Jiangella	neg_2109	0.890909075737	0.000542144516154419
Melissococcus	neg_2109	-0.854545474052429	0.00163680247839526
Acidaminobacter	neg_2109	0.854545474052429	0.00163680247839526
Sideroxydans	neg_2109	-0.890909075737	0.000542144516154419
Mailhella	neg_2109	-0.975757598876953	1.46754063035104e-06
Flexilinea	neg_2109	-0.854545474052429	0.00163680247839526
Caloramator	neg_2116	0.866666674613953	0.0011735379121256
Catenovulum	neg_2116	-0.963636338710785	7.32099466027591e-06
Kriegella	neg_2116	0.878787875175476	0.000813862205061078
Propionicimonas	neg_2116	0.851067781448364	0.00179112909994994
Lawsonella	neg_2116	0.863225877285004	0.00129381457010247
Thermoanaerobacter	neg_2116	0.878787875175476	0.000813862205061078
Anaerobacterium	neg_2116	0.806060612201691	0.0048620605246823
Trichormus	neg_2116	-0.866666674613953	0.0011735379121256
Variovorax	neg_2116	0.915151536464691	0.000204472206099204
Caldicellulosiruptor	neg_2116	0.806060612201691	0.0048620605246823
Eah2virus	neg_2116	0.81251859664917	0.00428159166664499
Thermobifida	neg_2134	-0.866666674613953	0.0011735379121256
Stappia	neg_2134	0.818181812763214	0.00381492051076338
Erythrobacter	neg_2134	0.806060612201691	0.0048620605246823
Pakpunavirus	neg_2134	0.802435338497162	0.00521145970824932
Lihuaxuella	neg_2134	0.854545474052429	0.00163680247839526
Acetivibrio	neg_2134	-0.818181812763214	0.00381492051076338
Fimbriimonas	neg_2134	0.842424213886261	0.00222003275351312
Izhakiella	neg_2134	0.814593434333801	0.00410613103846336
Desulfocucumis	neg_2134	-0.866666674613953	0.0011735379121256
Promicromonospora	neg_2134	0.878787875175476	0.000813862205061078
Litorimonas	neg_2157	0.818181812763214	0.00381492051076338
Zhihengliuella	neg_2157	-0.842424213886261	0.00222003275351312
Rodentibacter	neg_2157	0.818181812763214	0.00381492051076338
Acetivibrio	neg_2157	-0.818181812763214	0.00381492051076338
Izhakiella	neg_2157	0.808514356613159	0.00463528246178302
Desulfocucumis	neg_2157	-0.830303013324738	0.00294022813612127
Thermobifida	neg_2164	-0.818181812763214	0.00381492051076338
Stappia	neg_2164	0.878787875175476	0.000813862205061078
Caloramator	neg_2164	0.806060612201691	0.0048620605246823
Catenovulum	neg_2164	-0.818181812763214	0.00381492051076338
Lawsonella	neg_2164	0.936174511909485	6.71888372667517e-05
Dethiosulfovibrio	neg_2164	-0.806060612201691	0.0048620605246823
Variovorax	neg_2164	0.830303013324738	0.00294022813612127
Thermobifida	neg_2197	-0.865095794200897	0.00122739260821847
Stappia	neg_2197	0.865095794200897	0.00122739260821847
Caloramator	neg_2197	0.80374151468277	0.00508357521208702
Anaerotignum	neg_2197	-0.828283190727234	0.00307477558489877
Litorimonas	neg_2197	0.828283190727234	0.00307477558489877
Haliscomenobacter	neg_2197	0.852824926376343	0.00171189540742711
Zhihengliuella	neg_2197	-0.80374151468277	0.00508357521208702
Lawsonella	neg_2197	0.904653906822205	0.000321819947074919
Harryflintia	neg_2197	0.852824926376343	0.00171189540742711
Desulfocucumis	neg_2197	-0.840554058551788	0.00232177976116144
Succinimonas	neg_2197	-0.877366662025452	0.000851188393096614
Candidatus_Tokpelaia	neg_2251	0.927272737026215	0.000112034447641074
Kordiimonas	neg_2251	0.939393937587738	5.48405364009241e-05
Pararhodospirillum	neg_2251	0.818181812763214	0.00381492051076338
Candidatus_Electrothrix	neg_2251	0.854545474052429	0.00163680247839526
Parafilimonas	neg_2251	-0.854545474052429	0.00163680247839526
Thermobifida	neg_2257	-0.820672512054443	0.00362170350001234
Stappia	neg_2257	0.826751530170441	0.00317971472634282
Anaerotignum	neg_2257	-0.826751530170441	0.00317971472634282
Haliscomenobacter	neg_2257	0.814593434333801	0.00410613103846336
Zhihengliuella	neg_2257	-0.851067781448364	0.00179112909994994
Lihuaxuella	neg_2257	0.808514356613159	0.00463528246178302
Lawsonella	neg_2257	0.826219499111176	0.00321676075800825
Rodentibacter	neg_2257	0.826751530170441	0.00317971472634282
Marivita	neg_2257	-0.820672512054443	0.00362170350001234
Acetivibrio	neg_2257	-0.802435338497162	0.00521145970824932
Izhakiella	neg_2257	0.83841460943222	0.00244225698888578
Desulfocucumis	neg_2257	-0.863225877285004	0.00129381457010247
Succinimonas	neg_2257	-0.826751530170441	0.00317971472634282
Haliscomenobacter	neg_2264	-0.915151536464691	0.000204472206099204
Zhihengliuella	neg_2264	0.842424213886261	0.00222003275351312
Lawsonella	neg_2264	-0.881463050842285	0.000746860533753502
Halothiobacillus	neg_2264	0.842424213886261	0.00222003275351312
Izhakiella	neg_2264	-0.808514356613159	0.00463528246178302
Succinimonas	neg_2264	0.939393937587738	5.48405364009241e-05
Catenovulum	neg_2267	-0.866666674613953	0.0011735379121256
Kriegella	neg_2267	0.854545474052429	0.00163680247839526
Thermoanaerobacter	neg_2267	0.890909075737	0.000542144516154419
Variovorax	neg_2267	0.915151536464691	0.000204472206099204
Anaerotignum	neg_2280	-0.83890962600708	0.00241398974898654
Litorimonas	neg_2280	0.851067781448364	0.00179112909994994
Haliscomenobacter	neg_2280	0.820672512054443	0.00362170350001234
Zhihengliuella	neg_2280	-0.863225877285004	0.00129381457010247
Lawsonella	neg_2280	0.853658556938171	0.00167520705151691
Rodentibacter	neg_2280	0.83890962600708	0.00241398974898654
Larkinella	neg_2280	0.820672512054443	0.00362170350001234
Izhakiella	neg_2280	0.914634168148041	0.00020937092948925
Desulfocucumis	neg_2280	-0.814593434333801	0.00410613103846336
Porticoccus	neg_2280	0.826751530170441	0.00317971472634282
Succinimonas	neg_2280	-0.869304955005646	0.00108698415655106
Candidatus_Arcanobacter	neg_2280	0.814593434333801	0.00410613103846336
Zhihengliuella	neg_2282	-0.842424213886261	0.00222003275351312
Lawsonella	neg_2282	0.802435338497162	0.00521145970824932
Izhakiella	neg_2282	0.802435338497162	0.00521145970824932
Sulfobacillus	neg_2298	0.806060612201691	0.0048620605246823
Candidatus_Sulfopaludibacter	neg_2310	-0.806060612201691	0.0048620605246823
Kordiimonas	neg_2310	-0.806060612201691	0.0048620605246823
Pararhodospirillum	neg_2310	-0.878787875175476	0.000813862205061078
Candidatus_Electrothrix	neg_2310	-0.806060612201691	0.0048620605246823
Thermopetrobacter	neg_2310	-0.854545474052429	0.00163680247839526
Litorimonas	neg_2373	0.818181812763214	0.00381492051076338
Zhihengliuella	neg_2373	-0.915151536464691	0.000204472206099204
Lawsonella	neg_2373	0.851067781448364	0.00179112909994994
Rodentibacter	neg_2373	0.890909075737	0.000542144516154419
Izhakiella	neg_2373	0.851067781448364	0.00179112909994994
Brevinema	neg_2383	-0.806060612201691	0.0048620605246823
Acetivibrio	neg_2383	0.806060612201691	0.0048620605246823
Turicibacter	neg_2383	-0.915151536464691	0.000204472206099204
Catenovulum	neg_2400	-0.806060612201691	0.0048620605246823
Kriegella	neg_2400	0.818181812763214	0.00381492051076338
Brevinema	neg_2400	0.842424213886261	0.00222003275351312
Limnobacter	neg_2400	0.826751530170441	0.00317971472634282
Thermoanaerobacter	neg_2400	0.878787875175476	0.000813862205061078
Lmd1virus	neg_2400	-0.806643962860107	0.00480744414521128
Sideroxydans	neg_2400	-0.806060612201691	0.0048620605246823
Anaerotignum	neg_2415	-0.826751530170441	0.00317971472634282
Litorimonas	neg_2415	0.826751530170441	0.00317971472634282
Haliscomenobacter	neg_2415	0.844988703727722	0.00208579660703911
Zhihengliuella	neg_2415	-0.875383973121643	0.00090532610126548
Lawsonella	neg_2415	0.902438998222351	0.00035181140785312
Rodentibacter	neg_2415	0.826751530170441	0.00317971472634282
Izhakiella	neg_2415	0.902438998222351	0.00035181140785312
Succinimonas	neg_2415	-0.893621146678925	0.000491873064334847
Litorimonas	neg_2446	0.878787875175476	0.000813862205061078
Brevinema	neg_2446	0.806060612201691	0.0048620605246823
Haliscomenobacter	neg_2446	0.842424213886261	0.00222003275351312
Zhihengliuella	neg_2446	-0.890909075737	0.000542144516154419
Lawsonella	neg_2446	0.832830607891083	0.00277788845123905
Rodentibacter	neg_2446	0.830303013324738	0.00294022813612127
Harryflintia	neg_2446	0.842424213886261	0.00222003275351312
Izhakiella	neg_2446	0.832830607891083	0.00277788845123905
Desulfocucumis	neg_2446	-0.806060612201691	0.0048620605246823
Porticoccus	neg_2446	0.830303013324738	0.00294022813612127
Succinimonas	neg_2446	-0.866666674613953	0.0011735379121256
Thermobifida	neg_2456	-0.806643962860107	0.00480744414521128
Turicibacter	neg_2456	0.862921476364136	0.00130486922968087
Litorimonas	neg_2461	0.830303013324738	0.00294022813612127
Zhihengliuella	neg_2461	-0.927272737026215	0.000112034447641074
Lawsonella	neg_2461	0.83890962600708	0.00241398974898654
Rodentibacter	neg_2461	0.878787875175476	0.000813862205061078
Izhakiella	neg_2461	0.875383973121643	0.00090532610126548
Porticoccus	neg_2461	0.806060612201691	0.0048620605246823
Succinimonas	neg_2461	-0.842424213886261	0.00222003275351312
Anaerotignum	neg_2462	-0.878787875175476	0.000813862205061078
Erythrobacter	neg_2462	0.830303013324738	0.00294022813612127
Litorimonas	neg_2462	0.854545474052429	0.00163680247839526
Zhihengliuella	neg_2462	-0.830303013324738	0.00294022813612127
Lawsonella	neg_2462	0.887542068958282	0.000609666476501403
Rodentibacter	neg_2462	0.854545474052429	0.00163680247839526
Palleronia	neg_2462	-0.814593434333801	0.00410613103846336
Larkinella	neg_2462	0.830303013324738	0.00294022813612127
Limnobacter	neg_2462	0.814593434333801	0.00410613103846336
Trichormus	neg_2462	-0.818181812763214	0.00381492051076338
Izhakiella	neg_2462	0.887542068958282	0.000609666476501403
Desulfocucumis	neg_2462	-0.854545474052429	0.00163680247839526
Succinimonas	neg_2462	-0.842424213886261	0.00222003275351312
Catenovulum	neg_2485	-0.878787875175476	0.000813862205061078
Lawsonella	neg_2485	0.851067781448364	0.00179112909994994
Anaerobacterium	neg_2485	0.806060612201691	0.0048620605246823
Variovorax	neg_2485	0.878787875175476	0.000813862205061078
Candidatus_Kryptobacter	neg_2485	-0.890909075737	0.000542144516154419
Stappia	neg_2505	0.854545474052429	0.00163680247839526
Caloramator	neg_2505	0.903030276298523	0.000343612565232743
Anaerotignum	neg_2505	-0.806060612201691	0.0048620605246823
Candidatus_Tokpelaia	neg_2505	0.830303013324738	0.00294022813612127
Lawsonella	neg_2505	0.948332667350769	2.92858403718732e-05
Rodentibacter	neg_2505	0.830303013324738	0.00294022813612127
Marivita	neg_2505	-0.818181812763214	0.00381492051076338
Halothiobacillus	neg_2505	-0.818181812763214	0.00381492051076338
Trichormus	neg_2505	-0.818181812763214	0.00381492051076338
Succinimonas	neg_2505	-0.806060612201691	0.0048620605246823
Catenovulum	neg_2564	-0.830303013324738	0.00294022813612127
Lawsonella	neg_2564	0.83890962600708	0.00241398974898654
Variovorax	neg_2564	0.927272737026215	0.000112034447641074
Litorimonas	neg_2570	0.866666674613953	0.0011735379121256
Zhihengliuella	neg_2570	-0.842424213886261	0.00222003275351312
Rodentibacter	neg_2570	0.818181812763214	0.00381492051076338
Acetivibrio	neg_2570	-0.854545474052429	0.00163680247839526
Desulfocucumis	neg_2570	-0.842424213886261	0.00222003275351312
Porticoccus	neg_2570	0.866666674613953	0.0011735379121256
Erythrobacter	neg_2627	-0.854545474052429	0.00163680247839526
Candidatus_Moduliflexus	neg_2627	-0.878787875175476	0.000813862205061078
Pakpunavirus	neg_2627	-0.887542068958282	0.000609666476501403
Ottowia	neg_2627	0.939393937587738	5.48405364009241e-05
Propionicimonas	neg_2627	-0.802435338497162	0.00521145970824932
Candidatus_Sulfopaludibacter	neg_2627	-0.927272737026215	0.000112034447641074
Palleronia	neg_2627	0.802435338497162	0.00521145970824932
Alkalibacterium	neg_2627	-0.806060612201691	0.0048620605246823
Microscilla	neg_2627	-0.830303013324738	0.00294022813612127
Novimethylophilus	neg_2627	-0.830303013324738	0.00294022813612127
Gottschalkia	neg_2627	-0.830303013324738	0.00294022813612127
Melissococcus	neg_2627	0.903030276298523	0.000343612565232743
Fimbriimonas	neg_2627	-0.830303013324738	0.00294022813612127
Candidatus_Electrothrix	neg_2627	-0.806060612201691	0.0048620605246823
Methanosalsum	neg_2627	0.854545474052429	0.00163680247839526
Thiodictyon	neg_2627	0.890909075737	0.000542144516154419
Candidatus_Halobonum	neg_2627	-0.83890962600708	0.00241398974898654
Metaprevotella	neg_2627	-0.878787875175476	0.000813862205061078
Anaerotignum	neg_2643	-0.939393937587738	5.48405364009241e-05
Erythrobacter	neg_2643	0.830303013324738	0.00294022813612127
Candidatus_Kryptonium	neg_2643	0.818181812763214	0.00381492051076338
Litorimonas	neg_2643	0.806060612201691	0.0048620605246823
Parapedobacter	neg_2643	0.842424213886261	0.00222003275351312
Ottowia	neg_2643	-0.806060612201691	0.0048620605246823
Zhihengliuella	neg_2643	-0.866666674613953	0.0011735379121256
Lihuaxuella	neg_2643	0.842424213886261	0.00222003275351312
Lawsonella	neg_2643	0.863225877285004	0.00129381457010247
Rodentibacter	neg_2643	0.915151536464691	0.000204472206099204
Palleronia	neg_2643	-0.899700224399567	0.000391673296721073
Microscilla	neg_2643	0.830303013324738	0.00294022813612127
Limnobacter	neg_2643	0.802435338497162	0.00521145970824932
Melghirimyces	neg_2643	0.854545474052429	0.00163680247839526
Izhakiella	neg_2643	0.948332667350769	2.92858403718732e-05
Desulfocucumis	neg_2643	-0.854545474052429	0.00163680247839526
Succinimonas	neg_2643	-0.842424213886261	0.00222003275351312
Candidatus_Arcanobacter	neg_2643	0.854545474052429	0.00163680247839526
Erythrobacter	neg_2684	0.820672512054443	0.00362170350001234
Litorimonas	neg_2684	0.887542068958282	0.000609666476501403
Chloroflexus	neg_2684	0.814593434333801	0.00410613103846336
Larkinella	neg_2684	0.942253589630127	4.53587077142714e-05
Thermosyntropha	neg_2684	0.814593434333801	0.00410613103846336
Trichormus	neg_2684	-0.814593434333801	0.00410613103846336
Porticoccus	neg_2684	0.863225877285004	0.00129381457010247
Natronolimnobius	neg_2684	0.820672512054443	0.00362170350001234
Ktedonobacter	neg_2684	0.899700224399567	0.000391673296721073
Thermobifida	neg_2738	0.878787875175476	0.000813862205061078
Stappia	neg_2738	-0.878787875175476	0.000813862205061078
Caloramator	neg_2738	-0.842424213886261	0.00222003275351312
Anaerotignum	neg_2738	0.818181812763214	0.00381492051076338
Lawsonella	neg_2738	-0.83890962600708	0.00241398974898654
Marivita	neg_2738	0.818181812763214	0.00381492051076338
Harryflintia	neg_2738	-0.866666674613953	0.0011735379121256
Candidatus_Sulfotelmatomonas	neg_2738	-0.854545474052429	0.00163680247839526
Desulfocucumis	neg_2738	0.890909075737	0.000542144516154419
Turicibacter	neg_2754	0.878787875175476	0.000813862205061078
Natribacillus	neg_2754	0.854545474052429	0.00163680247839526
Rubrivivax	neg_2788	0.830303013324738	0.00294022813612127
Dethiosulfovibrio	neg_2801	0.818181812763214	0.00381492051076338
Amantichitinum	neg_2801	-0.951515138149261	2.27985739738035e-05
Brevinema	neg_2803	0.854545474052429	0.00163680247839526
Mongoliibacter	neg_2803	0.806060612201691	0.0048620605246823
Limnobacter	neg_2803	0.808514356613159	0.00463528246178302
Thermoanaerobacter	neg_2803	0.842424213886261	0.00222003275351312
Lmd1virus	neg_2803	-0.831656157970428	0.00285249465359505
Eah2virus	neg_2803	0.805690705776215	0.00489692183645341
Stappia	neg_2833	0.842424213886261	0.00222003275351312
Lawsonella	neg_2833	0.936174511909485	6.71888372667517e-05
Variovorax	neg_2833	0.866666674613953	0.0011735379121256
Stappia	neg_2842	0.830303013324738	0.00294022813612127
Caloramator	neg_2842	0.866666674613953	0.0011735379121256
Catenovulum	neg_2842	-0.830303013324738	0.00294022813612127
Anaerotignum	neg_2842	-0.806060612201691	0.0048620605246823
Kriegella	neg_2842	0.818181812763214	0.00381492051076338
Candidatus_Kryptonium	neg_2842	0.842424213886261	0.00222003275351312
Candidatus_Tokpelaia	neg_2842	0.830303013324738	0.00294022813612127
Lawsonella	neg_2842	0.948332667350769	2.92858403718732e-05
Palleronia	neg_2842	-0.869304955005646	0.00108698415655106
Sinirhodobacter	neg_2842	-0.806060612201691	0.0048620605246823
Microscilla	neg_2842	0.878787875175476	0.000813862205061078
Halothiobacillus	neg_2842	-0.806060612201691	0.0048620605246823
Variovorax	neg_2842	0.890909075737	0.000542144516154419
Cvm10virus	neg_2842	0.831656157970428	0.00285249465359505
Thermobifida	neg_2851	0.830303013324738	0.00294022813612127
Chloroflexus	neg_2851	-0.806060612201691	0.0048620605246823
Emticicia	neg_2851	-0.818181812763214	0.00381492051076338
Ornithobacterium	neg_2851	-0.890909075737	0.000542144516154419
Comamonas	neg_2851	0.806060612201691	0.0048620605246823
Thermobifida	neg_286	-0.825403153896332	0.00327420560319291
Litorimonas	neg_286	0.881680607795715	0.000741594922435862
Haliscomenobacter	neg_286	0.856668412685394	0.00154747182074688
Zhihengliuella	neg_286	-0.881680607795715	0.000741594922435862
Lihuaxuella	neg_286	0.806643962860107	0.00480744414521128
Lawsonella	neg_286	0.802827417850494	0.00517283391309364
Rodentibacter	neg_286	0.81915009021759	0.00373894966455346
Acetivibrio	neg_286	-0.806643962860107	0.00480744414521128
Izhakiella	neg_286	0.865548312664032	0.00121169851367053
Desulfocucumis	neg_286	-0.825403153896332	0.00327420560319291
Porticoccus	neg_286	0.856668412685394	0.00154747182074688
Succinimonas	neg_286	-0.856668412685394	0.00154747182074688
Candidatus_Arcanobacter	neg_286	0.800390899181366	0.0054162086926719
Litorimonas	neg_2886	0.878787875175476	0.000813862205061078
Brevinema	neg_2886	0.806060612201691	0.0048620605246823
Haliscomenobacter	neg_2886	0.842424213886261	0.00222003275351312
Zhihengliuella	neg_2886	-0.890909075737	0.000542144516154419
Lawsonella	neg_2886	0.832830607891083	0.00277788845123905
Rodentibacter	neg_2886	0.830303013324738	0.00294022813612127
Harryflintia	neg_2886	0.842424213886261	0.00222003275351312
Izhakiella	neg_2886	0.832830607891083	0.00277788845123905
Desulfocucumis	neg_2886	-0.806060612201691	0.0048620605246823
Porticoccus	neg_2886	0.830303013324738	0.00294022813612127
Succinimonas	neg_2886	-0.866666674613953	0.0011735379121256
Thermobifida	neg_2892	0.830303013324738	0.00294022813612127
Haliscomenobacter	neg_2892	-0.830303013324738	0.00294022813612127
Litorimonas	neg_2932	0.854545474052429	0.00163680247839526
Haliscomenobacter	neg_2932	0.806060612201691	0.0048620605246823
Zhihengliuella	neg_2932	-0.915151536464691	0.000204472206099204
Lawsonella	neg_2932	0.851067781448364	0.00179112909994994
Rodentibacter	neg_2932	0.842424213886261	0.00222003275351312
Izhakiella	neg_2932	0.875383973121643	0.00090532610126548
Porticoccus	neg_2932	0.830303013324738	0.00294022813612127
Succinimonas	neg_2932	-0.854545474052429	0.00163680247839526
Limnobacter	neg_2965	0.826219499111176	0.00321676075800825
Thermoanaerobacter	neg_2965	0.820672512054443	0.00362170350001234
Eah2virus	neg_2965	0.808143377304077	0.00466907341223743
Rodentibacter	neg_2972	0.830303013324738	0.00294022813612127
Palleronia	neg_2972	-0.863225877285004	0.00129381457010247
Leminorella	neg_2972	-0.842424213886261	0.00222003275351312
Emticicia	neg_2973	-0.818181812763214	0.00381492051076338
Thermopetrobacter	neg_2973	-0.818181812763214	0.00381492051076338
Chloroflexus	neg_302	-0.854545474052429	0.00163680247839526
Pakpunavirus	neg_302	-0.887542068958282	0.000609666476501403
Thermosyntropha	neg_302	-0.915151536464691	0.000204472206099204
Anaerobacterium	neg_302	-0.806060612201691	0.0048620605246823
Fimbriimonas	neg_302	-0.878787875175476	0.000813862205061078
Natronolimnobius	neg_302	-0.842424213886261	0.00222003275351312
Candidatus_Halobonum	neg_302	-0.924016416072845	0.000132952728702396
Ktedonobacter	neg_302	-0.806060612201691	0.0048620605246823
Thermobifida	neg_3064	-0.818181812763214	0.00381492051076338
Litorimonas	neg_3064	0.903030276298523	0.000343612565232743
Brevinema	neg_3064	0.830303013324738	0.00294022813612127
Haliscomenobacter	neg_3064	0.842424213886261	0.00222003275351312
Zhihengliuella	neg_3064	-0.878787875175476	0.000813862205061078
Lmd1virus	neg_3064	-0.81915009021759	0.00373894966455346
Harryflintia	neg_3064	0.806060612201691	0.0048620605246823
Porticoccus	neg_3064	0.878787875175476	0.000813862205061078
Succinimonas	neg_3064	-0.818181812763214	0.00381492051076338
Anaerotignum	neg_3088	-0.828283190727234	0.00307477558489877
Erythrobacter	neg_3088	0.80374151468277	0.00508357521208702
Litorimonas	neg_3088	0.877366662025452	0.000851188393096614
Haliscomenobacter	neg_3088	0.80374151468277	0.00508357521208702
Zhihengliuella	neg_3088	-0.852824926376343	0.00171189540742711
Rodentibacter	neg_3088	0.840554058551788	0.00232177976116144
Harryflintia	neg_3088	0.852824926376343	0.00171189540742711
Izhakiella	neg_3088	0.85542106628418	0.00159951806374248
Desulfocucumis	neg_3088	-0.877366662025452	0.000851188393096614
Porticoccus	neg_3088	0.852824926376343	0.00171189540742711
Succinimonas	neg_3088	-0.828283190727234	0.00307477558489877
Kordiimonas	neg_3092	0.854545474052429	0.00163680247839526
Pararhodospirillum	neg_3092	0.951515138149261	2.27985739738035e-05
Thermopetrobacter	neg_3092	0.890909075737	0.000542144516154419
Brevinema	neg_3101	-0.863225877285004	0.00129381457010247
Mongoliibacter	neg_3101	-0.820672512054443	0.00362170350001234
Lmd1virus	neg_3101	0.865548312664032	0.00121169851367053
Turicibacter	neg_3101	-0.826751530170441	0.00317971472634282
Candidatus_Symbiobacter	neg_3101	-0.814593434333801	0.00410613103846336
Litorimonas	neg_3198	0.842424213886261	0.00222003275351312
Candidatus_Tokpelaia	neg_3198	0.830303013324738	0.00294022813612127
Zhihengliuella	neg_3198	-0.927272737026215	0.000112034447641074
Kordiimonas	neg_3198	0.842424213886261	0.00222003275351312
Lmd1virus	neg_3198	-0.806643962860107	0.00480744414521128
Dolosicoccus	neg_3198	-0.806060612201691	0.0048620605246823
Rubrivivax	neg_3252	0.854545474052429	0.00163680247839526
Mongoliibacter	neg_3294	-0.866666674613953	0.0011735379121256
Suttonella	neg_3294	0.830303013324738	0.00294022813612127
Limnobacter	neg_3294	-0.893621146678925	0.000491873064334847
Synergistes	neg_3294	0.830303013324738	0.00294022813612127
Candidatus_Symbiobacter	neg_3294	-0.878787875175476	0.000813862205061078
Anaerotignum	neg_3351	-0.806060612201691	0.0048620605246823
Kriegella	neg_3351	0.818181812763214	0.00381492051076338
Lawsonella	neg_3351	0.887542068958282	0.000609666476501403
Palleronia	neg_3351	-0.851067781448364	0.00179112909994994
Variovorax	neg_3351	0.806060612201691	0.0048620605246823
Leminorella	neg_3351	-0.830303013324738	0.00294022813612127
Eah2virus	neg_3351	0.833002269268036	0.00276710271221536
Anaerotignum	neg_3355	-0.806060612201691	0.0048620605246823
Dethiosulfovibrio	neg_3355	-0.903030276298523	0.000343612565232743
Candidatus_Sulfotelmatomonas	neg_3355	0.915151536464691	0.000204472206099204
Amantichitinum	neg_3355	0.878787875175476	0.000813862205061078
Thermobifida	neg_3360	-0.825403153896332	0.00327420560319291
Anaerotignum	neg_3360	-0.869174480438232	0.00109115185763287
Erythrobacter	neg_3360	0.850415349006653	0.00182121334938934
Litorimonas	neg_3360	0.894186735153198	0.000481835628326488
Brevinema	neg_3360	0.850415349006653	0.00182121334938934
Ottowia	neg_3360	-0.825403153896332	0.00327420560319291
Haliscomenobacter	neg_3360	0.831656157970428	0.00285249465359505
Zhihengliuella	neg_3360	-0.881680607795715	0.000741594922435862
Lihuaxuella	neg_3360	0.81915009021759	0.00373894966455346
Lawsonella	neg_3360	0.802827417850494	0.00517283391309364
Rodentibacter	neg_3360	0.881680607795715	0.000741594922435862
Candidatus_Sulfopaludibacter	neg_3360	0.806643962860107	0.00480744414521128
Palleronia	neg_3360	-0.840459942817688	0.00232698748109961
Larkinella	neg_3360	0.800390899181366	0.0054162086926719
Acetivibrio	neg_3360	-0.844162285327911	0.00212839548320387
Limnobacter	neg_3360	0.871820390224457	0.00100887727685151
Dolosicoccus	neg_3360	-0.81915009021759	0.00373894966455346
Izhakiella	neg_3360	0.878092467784882	0.000831973628321769
Desulfocucumis	neg_3360	-0.862921476364136	0.00130486922968087
Porticoccus	neg_3360	0.856668412685394	0.00154747182074688
Succinimonas	neg_3360	-0.831656157970428	0.00285249465359505
Candidatus_Arcanobacter	neg_3360	0.812897026538849	0.00424919679863534
Synergistes	neg_3362	0.878787875175476	0.000813862205061078
Thermobifida	neg_3377	-0.806060612201691	0.0048620605246823
Stappia	neg_3377	0.854545474052429	0.00163680247839526
Lawsonella	neg_3377	0.844988703727722	0.00208579660703911
Halothiobacillus	neg_3377	-0.842424213886261	0.00222003275351312
Succinimonas	neg_3377	-0.818181812763214	0.00381492051076338
Catenovulum	neg_3414	0.890909075737	0.000542144516154419
Lawsonella	neg_3414	-0.851067781448364	0.00179112909994994
Dethiosulfovibrio	neg_3414	0.866666674613953	0.0011735379121256
Ornithobacterium	neg_3414	-0.878787875175476	0.000813862205061078
Litorimonas	neg_3422	-0.854545474052429	0.00163680247839526
Zhihengliuella	neg_3422	0.890909075737	0.000542144516154419
Rodentibacter	neg_3422	-0.818181812763214	0.00381492051076338
Dolosicoccus	neg_3422	0.866666674613953	0.0011735379121256
Thermopetrobacter	neg_3422	-0.818181812763214	0.00381492051076338
Porticoccus	neg_3422	-0.951515138149261	2.27985739738035e-05
Anaerotignum	neg_344	-0.818181812763214	0.00381492051076338
Brevinema	neg_344	0.878787875175476	0.000813862205061078
Parapedobacter	neg_344	0.830303013324738	0.00294022813612127
Ottowia	neg_344	-0.854545474052429	0.00163680247839526
Haliscomenobacter	neg_344	0.903030276298523	0.000343612565232743
Zhihengliuella	neg_344	-0.890909075737	0.000542144516154419
Lihuaxuella	neg_344	0.842424213886261	0.00222003275351312
Rodentibacter	neg_344	0.830303013324738	0.00294022813612127
Candidatus_Sulfopaludibacter	neg_344	0.818181812763214	0.00381492051076338
Palleronia	neg_344	-0.899700224399567	0.000391673296721073
Suttonella	neg_344	-0.903030276298523	0.000343612565232743
Limnobacter	neg_344	0.863225877285004	0.00129381457010247
Melghirimyces	neg_344	0.818181812763214	0.00381492051076338
Dolosicoccus	neg_344	-0.866666674613953	0.0011735379121256
Izhakiella	neg_344	0.881463050842285	0.000746860533753502
Thermopetrobacter	neg_344	0.818181812763214	0.00381492051076338
Succinimonas	neg_344	-0.878787875175476	0.000813862205061078
Candidatus_Arcanobacter	neg_344	0.878787875175476	0.000813862205061078
Thermoanaerobacter	neg_3440	0.830303013324738	0.00294022813612127
Eah2virus	neg_3440	0.805690705776215	0.00489692183645341
Pakpunavirus	neg_3458	0.857146799564362	0.0015278405327328
Ottowia	neg_3458	-0.890909075737	0.000542144516154419
Lihuaxuella	neg_3458	0.854545474052429	0.00163680247839526
Candidatus_Sulfopaludibacter	neg_3458	0.878787875175476	0.000813862205061078
Larkinella	neg_3458	0.818181812763214	0.00381492051076338
Microscilla	neg_3458	0.842424213886261	0.00222003275351312
Melghirimyces	neg_3458	0.806060612201691	0.0048620605246823
Novimethylophilus	neg_3458	0.878787875175476	0.000813862205061078
Thermopetrobacter	neg_3458	0.818181812763214	0.00381492051076338
Natronolimnobius	neg_3458	0.830303013324738	0.00294022813612127
Candidatus_Arcanobacter	neg_3458	0.842424213886261	0.00222003275351312
Haliscomenobacter	neg_3487	-0.878787875175476	0.000813862205061078
Pararhodospirillum	neg_3487	-0.878787875175476	0.000813862205061078
Thermopetrobacter	neg_3487	-0.878787875175476	0.000813862205061078
Succinimonas	neg_3487	0.842424213886261	0.00222003275351312
Thermobifida	neg_3496	-0.842424213886261	0.00222003275351312
Stappia	neg_3496	0.806060612201691	0.0048620605246823
Litorimonas	neg_3496	0.830303013324738	0.00294022813612127
Haliscomenobacter	neg_3496	0.806060612201691	0.0048620605246823
Zhihengliuella	neg_3496	-0.830303013324738	0.00294022813612127
Acetivibrio	neg_3496	-0.818181812763214	0.00381492051076338
Harryflintia	neg_3496	0.806060612201691	0.0048620605246823
Desulfocucumis	neg_3496	-0.866666674613953	0.0011735379121256
Succinimonas	neg_3496	-0.806060612201691	0.0048620605246823
Erythrobacter	neg_3498	-0.842424213886261	0.00222003275351312
Litorimonas	neg_3498	-0.842424213886261	0.00222003275351312
Brevinema	neg_3498	-0.878787875175476	0.000813862205061078
Marivita	neg_3498	0.830303013324738	0.00294022813612127
Limnobacter	neg_3498	-0.887542068958282	0.000609666476501403
Lmd1virus	neg_3498	0.869174480438232	0.00109115185763287
Synergistes	neg_3498	0.866666674613953	0.0011735379121256
Comamonas	neg_3498	0.842424213886261	0.00222003275351312
Mudcatvirus	neg_3498	-0.806060612201691	0.0048620605246823
Eah2virus	neg_3498	-0.846658051013947	0.00200163182665913
Thermobifida	neg_3504	-0.80374151468277	0.00508357521208702
Anaerotignum	neg_3504	-0.816012322902679	0.0039891464803441
Litorimonas	neg_3504	0.852824926376343	0.00171189540742711
Haliscomenobacter	neg_3504	0.828283190727234	0.00307477558489877
Zhihengliuella	neg_3504	-0.865095794200897	0.00122739260821847
Lawsonella	neg_3504	0.843112826347351	0.00218339276204738
Rodentibacter	neg_3504	0.828283190727234	0.00307477558489877
Harryflintia	neg_3504	0.828283190727234	0.00307477558489877
Izhakiella	neg_3504	0.843112826347351	0.00218339276204738
Desulfocucumis	neg_3504	-0.852824926376343	0.00171189540742711
Porticoccus	neg_3504	0.80374151468277	0.00508357521208702
Succinimonas	neg_3504	-0.852824926376343	0.00171189540742711
Brevinema	neg_3529	-0.830303013324738	0.00294022813612127
Zhihengliuella	neg_3529	0.866666674613953	0.0011735379121256
Lihuaxuella	neg_3529	-0.806060612201691	0.0048620605246823
Rodentibacter	neg_3529	-0.842424213886261	0.00222003275351312
Candidatus_Sulfopaludibacter	neg_3529	-0.854545474052429	0.00163680247839526
Pararhodospirillum	neg_3529	-0.818181812763214	0.00381492051076338
Dolosicoccus	neg_3529	0.927272737026215	0.000112034447641074
Candidatus_Electrothrix	neg_3529	-0.818181812763214	0.00381492051076338
Thermopetrobacter	neg_3529	-0.915151536464691	0.000204472206099204
Porticoccus	neg_3529	-0.806060612201691	0.0048620605246823
Synergistes	neg_3564	0.854545474052429	0.00163680247839526
Thermoanaerobacter	neg_3566	-0.878787875175476	0.000813862205061078
Trichormus	neg_3566	0.818181812763214	0.00381492051076338
Variovorax	neg_3566	-0.903030276298523	0.000343612565232743
Thermoanaerobacter	neg_3586	0.806060612201691	0.0048620605246823
Sinirhodobacter	neg_3587	0.806060612201691	0.0048620605246823
Flexilinea	neg_3587	0.842424213886261	0.00222003275351312
Anaerotignum	neg_3592	-0.878787875175476	0.000813862205061078
Litorimonas	neg_3592	0.818181812763214	0.00381492051076338
Zhihengliuella	neg_3592	-0.854545474052429	0.00163680247839526
Lihuaxuella	neg_3592	0.842424213886261	0.00222003275351312
Lawsonella	neg_3592	0.814593434333801	0.00410613103846336
Rodentibacter	neg_3592	0.866666674613953	0.0011735379121256
Palleronia	neg_3592	-0.808514356613159	0.00463528246178302
Izhakiella	neg_3592	0.948332667350769	2.92858403718732e-05
Desulfocucumis	neg_3592	-0.842424213886261	0.00222003275351312
Porticoccus	neg_3592	0.818181812763214	0.00381492051076338
Succinimonas	neg_3592	-0.842424213886261	0.00222003275351312
Candidatus_Arcanobacter	neg_3592	0.866666674613953	0.0011735379121256
Anaerotignum	neg_3608	-0.828283190727234	0.00307477558489877
Erythrobacter	neg_3608	0.80374151468277	0.00508357521208702
Litorimonas	neg_3608	0.877366662025452	0.000851188393096614
Haliscomenobacter	neg_3608	0.80374151468277	0.00508357521208702
Zhihengliuella	neg_3608	-0.852824926376343	0.00171189540742711
Rodentibacter	neg_3608	0.840554058551788	0.00232177976116144
Harryflintia	neg_3608	0.852824926376343	0.00171189540742711
Izhakiella	neg_3608	0.85542106628418	0.00159951806374248
Desulfocucumis	neg_3608	-0.877366662025452	0.000851188393096614
Porticoccus	neg_3608	0.852824926376343	0.00171189540742711
Succinimonas	neg_3608	-0.828283190727234	0.00307477558489877
Stappia	neg_3609	0.830303013324738	0.00294022813612127
Caloramator	neg_3609	0.806060612201691	0.0048620605246823
Anaerotignum	neg_3609	-0.903030276298523	0.000343612565232743
Litorimonas	neg_3609	0.806060612201691	0.0048620605246823
Brevinema	neg_3609	0.806060612201691	0.0048620605246823
Haliscomenobacter	neg_3609	0.806060612201691	0.0048620605246823
Zhihengliuella	neg_3609	-0.854545474052429	0.00163680247839526
Lawsonella	neg_3609	0.924016416072845	0.000132952728702396
Rodentibacter	neg_3609	0.878787875175476	0.000813862205061078
Palleronia	neg_3609	-0.808514356613159	0.00463528246178302
Marivita	neg_3609	-0.842424213886261	0.00222003275351312
Izhakiella	neg_3609	0.875383973121643	0.00090532610126548
Desulfocucumis	neg_3609	-0.866666674613953	0.0011735379121256
Succinimonas	neg_3609	-0.854545474052429	0.00163680247839526
Litorimonas	neg_3637	0.878787875175476	0.000813862205061078
Brevinema	neg_3637	0.806060612201691	0.0048620605246823
Haliscomenobacter	neg_3637	0.842424213886261	0.00222003275351312
Zhihengliuella	neg_3637	-0.890909075737	0.000542144516154419
Lawsonella	neg_3637	0.832830607891083	0.00277788845123905
Rodentibacter	neg_3637	0.830303013324738	0.00294022813612127
Harryflintia	neg_3637	0.842424213886261	0.00222003275351312
Izhakiella	neg_3637	0.832830607891083	0.00277788845123905
Desulfocucumis	neg_3637	-0.806060612201691	0.0048620605246823
Porticoccus	neg_3637	0.830303013324738	0.00294022813612127
Succinimonas	neg_3637	-0.866666674613953	0.0011735379121256
Anaerotignum	neg_3653	-0.842424213886261	0.00222003275351312
Litorimonas	neg_3653	0.818181812763214	0.00381492051076338
Haliscomenobacter	neg_3653	0.806060612201691	0.0048620605246823
Zhihengliuella	neg_3653	-0.842424213886261	0.00222003275351312
Lawsonella	neg_3653	0.875383973121643	0.00090532610126548
Rodentibacter	neg_3653	0.830303013324738	0.00294022813612127
Harryflintia	neg_3653	0.806060612201691	0.0048620605246823
Izhakiella	neg_3653	0.875383973121643	0.00090532610126548
Desulfocucumis	neg_3653	-0.854545474052429	0.00163680247839526
Succinimonas	neg_3653	-0.854545474052429	0.00163680247839526
Anaerotignum	neg_3656	0.806060612201691	0.0048620605246823
Candidatus_Kryptonium	neg_3656	-0.878787875175476	0.000813862205061078
Ottowia	neg_3656	0.830303013324738	0.00294022813612127
Melissococcus	neg_3656	0.842424213886261	0.00222003275351312
Thiodictyon	neg_3656	0.878787875175476	0.000813862205061078
Promicromonospora	neg_3656	-0.806060612201691	0.0048620605246823
Leminorella	neg_3656	0.818181812763214	0.00381492051076338
Stappia	neg_3666	0.830303013324738	0.00294022813612127
Caloramator	neg_3666	0.866666674613953	0.0011735379121256
Chloroflexus	neg_3666	0.818181812763214	0.00381492051076338
Candidatus_Tokpelaia	neg_3666	0.842424213886261	0.00222003275351312
Pakpunavirus	neg_3666	0.857146799564362	0.0015278405327328
Lawsonella	neg_3666	0.826751530170441	0.00317971472634282
Kordiimonas	neg_3666	0.806060612201691	0.0048620605246823
Microscilla	neg_3666	0.830303013324738	0.00294022813612127
Halothiobacillus	neg_3666	-0.854545474052429	0.00163680247839526
Candidatus_Electrothrix	neg_3666	0.818181812763214	0.00381492051076338
Cvm10virus	neg_3666	0.81915009021759	0.00373894966455346
Parafilimonas	neg_3666	-0.854545474052429	0.00163680247839526
Thermobifida	neg_3689	-0.806060612201691	0.0048620605246823
Stappia	neg_3689	0.842424213886261	0.00222003275351312
Anaerotignum	neg_3689	-0.854545474052429	0.00163680247839526
Haliscomenobacter	neg_3689	0.842424213886261	0.00222003275351312
Zhihengliuella	neg_3689	-0.854545474052429	0.00163680247839526
Lihuaxuella	neg_3689	0.818181812763214	0.00381492051076338
Lawsonella	neg_3689	0.930095493793488	9.59607762942571e-05
Rodentibacter	neg_3689	0.830303013324738	0.00294022813612127
Palleronia	neg_3689	-0.881463050842285	0.000746860533753502
Izhakiella	neg_3689	0.881463050842285	0.000746860533753502
Succinimonas	neg_3689	-0.866666674613953	0.0011735379121256
Candidatus_Arcanobacter	neg_3689	0.806060612201691	0.0048620605246823
Litorimonas	neg_3705	-0.806060612201691	0.0048620605246823
Haliscomenobacter	neg_3705	-0.806060612201691	0.0048620605246823
Porticoccus	neg_3705	-0.854545474052429	0.00163680247839526
Succinimonas	neg_3705	0.806060612201691	0.0048620605246823
Lmd1virus	neg_3723	0.806643962860107	0.00480744414521128
Anaerotignum	neg_3739	-0.830303013324738	0.00294022813612127
Erythrobacter	neg_3739	0.842424213886261	0.00222003275351312
Kriegella	neg_3739	0.830303013324738	0.00294022813612127
Candidatus_Kryptonium	neg_3739	0.842424213886261	0.00222003275351312
Parapedobacter	neg_3739	0.854545474052429	0.00163680247839526
Pakpunavirus	neg_3739	0.857146799564362	0.0015278405327328
Ottowia	neg_3739	-0.939393937587738	5.48405364009241e-05
Propionicimonas	neg_3739	0.917937397956848	0.00017952998751225
Candidatus_Sulfopaludibacter	neg_3739	0.806060612201691	0.0048620605246823
Palleronia	neg_3739	-0.869304955005646	0.00108698415655106
Sinirhodobacter	neg_3739	-0.806060612201691	0.0048620605246823
Microscilla	neg_3739	0.915151536464691	0.000204472206099204
Melghirimyces	neg_3739	0.842424213886261	0.00222003275351312
Marmoricola	neg_3739	-0.915151536464691	0.000204472206099204
Novimethylophilus	neg_3739	0.890909075737	0.000542144516154419
Jiangella	neg_3739	0.878787875175476	0.000813862205061078
Melissococcus	neg_3739	-0.915151536464691	0.000204472206099204
Mailhella	neg_3739	-0.915151536464691	0.000204472206099204
Fimbriimonas	neg_3739	0.818181812763214	0.00381492051076338
Candidatus_Kryptobacter	neg_3739	-0.830303013324738	0.00294022813612127
Candidatus_Sulfopaludibacter	neg_3759	0.840554058551788	0.00232177976116144
Candidatus_Electrothrix	neg_3759	0.828283190727234	0.00307477558489877
Lmd1virus	neg_3762	-0.800390899181366	0.0054162086926719
Mongoliibacter	neg_3785	0.854545474052429	0.00163680247839526
Emticicia	neg_3785	0.842424213886261	0.00222003275351312
Suttonella	neg_3785	-0.842424213886261	0.00222003275351312
Candidatus_Symbiobacter	neg_3785	0.866666674613953	0.0011735379121256
Anaerotignum	neg_3807	-0.806060612201691	0.0048620605246823
Lawsonella	neg_3807	0.875383973121643	0.00090532610126548
Palleronia	neg_3807	-0.802435338497162	0.00521145970824932
Dethiosulfovibrio	neg_3807	-0.854545474052429	0.00163680247839526
Izhakiella	neg_3807	0.802435338497162	0.00521145970824932
Leminorella	neg_3807	-0.830303013324738	0.00294022813612127
Amantichitinum	neg_3807	0.806060612201691	0.0048620605246823
Thermobifida	neg_3820	-0.830303013324738	0.00294022813612127
Stappia	neg_3820	0.818181812763214	0.00381492051076338
Anaerotignum	neg_3820	-0.866666674613953	0.0011735379121256
Erythrobacter	neg_3820	0.878787875175476	0.000813862205061078
Litorimonas	neg_3820	0.854545474052429	0.00163680247839526
Lawsonella	neg_3820	0.820672512054443	0.00362170350001234
Rodentibacter	neg_3820	0.842424213886261	0.00222003275351312
Marivita	neg_3820	-0.806060612201691	0.0048620605246823
Acetivibrio	neg_3820	-0.854545474052429	0.00163680247839526
Harryflintia	neg_3820	0.830303013324738	0.00294022813612127
Trichormus	neg_3820	-0.806060612201691	0.0048620605246823
Fimbriimonas	neg_3820	0.806060612201691	0.0048620605246823
Izhakiella	neg_3820	0.820672512054443	0.00362170350001234
Candidatus_Sulfotelmatomonas	neg_3820	0.842424213886261	0.00222003275351312
Desulfocucumis	neg_3820	-0.927272737026215	0.000112034447641074
Promicromonospora	neg_3820	0.842424213886261	0.00222003275351312
Mudcatvirus	neg_3820	0.854545474052429	0.00163680247839526
Caloramator	neg_3852	0.830303013324738	0.00294022813612127
Catenovulum	neg_3852	-0.903030276298523	0.000343612565232743
Kriegella	neg_3852	0.854545474052429	0.00163680247839526
Candidatus_Kryptonium	neg_3852	0.806060612201691	0.0048620605246823
Mycolicibacter	neg_3852	-0.842424213886261	0.00222003275351312
Parapedobacter	neg_3852	0.842424213886261	0.00222003275351312
Propionicimonas	neg_3852	0.802435338497162	0.00521145970824932
Lawsonella	neg_3852	0.905779242515564	0.000307323103084567
Microscilla	neg_3852	0.818181812763214	0.00381492051076338
Thermoanaerobacter	neg_3852	0.854545474052429	0.00163680247839526
Sideroxydans	neg_3852	-0.830303013324738	0.00294022813612127
Anoxybacillus	neg_3852	0.806060612201691	0.0048620605246823
Variovorax	neg_3852	0.878787875175476	0.000813862205061078
Caldicellulosiruptor	neg_3852	0.854545474052429	0.00163680247839526
Cvm10virus	neg_3852	0.875427544116974	0.000904110124716251
Beggiatoa	neg_3889	-0.915151536464691	0.000204472206099204
Anaerotignum	neg_392	-0.842424213886261	0.00222003275351312
Litorimonas	neg_392	0.818181812763214	0.00381492051076338
Haliscomenobacter	neg_392	0.806060612201691	0.0048620605246823
Zhihengliuella	neg_392	-0.842424213886261	0.00222003275351312
Lawsonella	neg_392	0.875383973121643	0.00090532610126548
Rodentibacter	neg_392	0.830303013324738	0.00294022813612127
Harryflintia	neg_392	0.806060612201691	0.0048620605246823
Izhakiella	neg_392	0.875383973121643	0.00090532610126548
Desulfocucumis	neg_392	-0.854545474052429	0.00163680247839526
Succinimonas	neg_392	-0.854545474052429	0.00163680247839526
Anaerotignum	neg_3940	-0.854545474052429	0.00163680247839526
Litorimonas	neg_3940	0.866666674613953	0.0011735379121256
Haliscomenobacter	neg_3940	0.842424213886261	0.00222003275351312
Zhihengliuella	neg_3940	-0.878787875175476	0.000813862205061078
Lawsonella	neg_3940	0.936174511909485	6.71888372667517e-05
Rodentibacter	neg_3940	0.854545474052429	0.00163680247839526
Palleronia	neg_3940	-0.802435338497162	0.00521145970824932
Limnobacter	neg_3940	0.820672512054443	0.00362170350001234
Trichormus	neg_3940	-0.818181812763214	0.00381492051076338
Izhakiella	neg_3940	0.875383973121643	0.00090532610126548
Succinimonas	neg_3940	-0.890909075737	0.000542144516154419
Thermobifida	neg_410	-0.818181812763214	0.00381492051076338
Stappia	neg_410	0.854545474052429	0.00163680247839526
Caloramator	neg_410	0.915151536464691	0.000204472206099204
Chloroflexus	neg_410	0.854545474052429	0.00163680247839526
Defluviimonas	neg_410	-0.854545474052429	0.00163680247839526
Anaerobacterium	neg_410	0.951515138149261	2.27985739738035e-05
Methanosphaerula	neg_410	-0.842424213886261	0.00222003275351312
Natribacillus	neg_410	0.927272737026215	0.000112034447641074
Candidatus_Halobonum	neg_410	0.863225877285004	0.00129381457010247
Thermobifida	neg_412	-0.818181812763214	0.00381492051076338
Haliscomenobacter	neg_412	0.878787875175476	0.000813862205061078
Emticicia	neg_412	0.878787875175476	0.000813862205061078
Suttonella	neg_412	-0.854545474052429	0.00163680247839526
Harryflintia	neg_412	0.818181812763214	0.00381492051076338
Candidatus_Symbiobacter	neg_412	0.830303013324738	0.00294022813612127
Succinimonas	neg_412	-0.854545474052429	0.00163680247839526
Anaerotignum	neg_420	-0.806060612201691	0.0048620605246823
Zhihengliuella	neg_420	-0.890909075737	0.000542144516154419
Lawsonella	neg_420	0.83890962600708	0.00241398974898654
Rodentibacter	neg_420	0.866666674613953	0.0011735379121256
Izhakiella	neg_420	0.875383973121643	0.00090532610126548
Succinimonas	neg_420	-0.818181812763214	0.00381492051076338
Thermobifida	neg_430	-0.840554058551788	0.00232177976116144
Stappia	neg_430	0.828283190727234	0.00307477558489877
Litorimonas	neg_430	0.80374151468277	0.00508357521208702
Haliscomenobacter	neg_430	0.865095794200897	0.00122739260821847
Zhihengliuella	neg_430	-0.816012322902679	0.0039891464803441
Lawsonella	neg_430	0.867729306221008	0.00113809565686207
Harryflintia	neg_430	0.840554058551788	0.00232177976116144
Izhakiella	neg_430	0.818496406078339	0.00379011736651003
Desulfocucumis	neg_430	-0.816012322902679	0.0039891464803441
Succinimonas	neg_430	-0.889637529850006	0.000566964581027118
Rubrivivax	neg_483	-0.890909075737	0.000542144516154419
Palleronia	neg_497	0.808514356613159	0.00463528246178302
Limnobacter	neg_497	-0.851067781448364	0.00179112909994994
Izhakiella	neg_497	-0.869304955005646	0.00108698415655106
Thermobifida	neg_552	-0.806060612201691	0.0048620605246823
Anaerotignum	neg_552	-0.903030276298523	0.000343612565232743
Erythrobacter	neg_552	0.903030276298523	0.000343612565232743
Litorimonas	neg_552	0.842424213886261	0.00222003275351312
Pakpunavirus	neg_552	0.802435338497162	0.00521145970824932
Zhihengliuella	neg_552	-0.806060612201691	0.0048620605246823
Lihuaxuella	neg_552	0.818181812763214	0.00381492051076338
Rodentibacter	neg_552	0.878787875175476	0.000813862205061078
Candidatus_Sulfopaludibacter	neg_552	0.818181812763214	0.00381492051076338
Marivita	neg_552	-0.830303013324738	0.00294022813612127
Acetivibrio	neg_552	-0.866666674613953	0.0011735379121256
Harryflintia	neg_552	0.806060612201691	0.0048620605246823
Fimbriimonas	neg_552	0.818181812763214	0.00381492051076338
Izhakiella	neg_552	0.857146799564362	0.0015278405327328
Candidatus_Sulfotelmatomonas	neg_552	0.830303013324738	0.00294022813612127
Desulfocucumis	neg_552	-0.939393937587738	5.48405364009241e-05
Promicromonospora	neg_552	0.830303013324738	0.00294022813612127
Mudcatvirus	neg_552	0.866666674613953	0.0011735379121256
Porticoccus	neg_552	0.806060612201691	0.0048620605246823
Brevinema	neg_560	-0.830303013324738	0.00294022813612127
Mycolicibacter	neg_560	0.842424213886261	0.00222003275351312
Candidatus_Moduliflexus	neg_560	-0.915151536464691	0.000204472206099204
Marivita	neg_560	0.842424213886261	0.00222003275351312
Comamonas	neg_560	0.878787875175476	0.000813862205061078
Anoxybacillus	neg_560	-0.830303013324738	0.00294022813612127
Cvm10virus	neg_560	-0.90043979883194	0.000380598613888061
Brevinema	neg_580	-0.830303013324738	0.00294022813612127
Rodentibacter	neg_580	-0.806060612201691	0.0048620605246823
Candidatus_Sulfopaludibacter	neg_580	-0.806060612201691	0.0048620605246823
Dolosicoccus	neg_580	0.854545474052429	0.00163680247839526
Candidatus_Electrothrix	neg_580	-0.806060612201691	0.0048620605246823
Thermopetrobacter	neg_580	-0.806060612201691	0.0048620605246823
Thermobifida	neg_59	0.830303013324738	0.00294022813612127
Stappia	neg_59	-0.830303013324738	0.00294022813612127
Anaerotignum	neg_59	0.890909075737	0.000542144516154419
Erythrobacter	neg_59	-0.854545474052429	0.00163680247839526
Brevinema	neg_59	-0.818181812763214	0.00381492051076338
Pakpunavirus	neg_59	-0.802435338497162	0.00521145970824932
Ottowia	neg_59	0.854545474052429	0.00163680247839526
Zhihengliuella	neg_59	0.818181812763214	0.00381492051076338
Lihuaxuella	neg_59	-0.866666674613953	0.0011735379121256
Rodentibacter	neg_59	-0.866666674613953	0.0011735379121256
Candidatus_Sulfopaludibacter	neg_59	-0.854545474052429	0.00163680247839526
Palleronia	neg_59	0.851067781448364	0.00179112909994994
Marivita	neg_59	0.818181812763214	0.00381492051076338
Acetivibrio	neg_59	0.890909075737	0.000542144516154419
Dolosicoccus	neg_59	0.806060612201691	0.0048620605246823
Izhakiella	neg_59	-0.863225877285004	0.00129381457010247
Thiodictyon	neg_59	0.818181812763214	0.00381492051076338
Desulfocucumis	neg_59	0.903030276298523	0.000343612565232743
Promicromonospora	neg_59	-0.818181812763214	0.00381492051076338
Mudcatvirus	neg_59	-0.842424213886261	0.00222003275351312
Candidatus_Arcanobacter	neg_59	-0.806060612201691	0.0048620605246823
Zhihengliuella	neg_637	0.866666674613953	0.0011735379121256
Dolosicoccus	neg_637	0.878787875175476	0.000813862205061078
Thermopetrobacter	neg_637	-0.878787875175476	0.000813862205061078
Anaerotignum	neg_64	-0.878787875175476	0.000813862205061078
Erythrobacter	neg_64	0.878787875175476	0.000813862205061078
Kriegella	neg_64	0.915151536464691	0.000204472206099204
Candidatus_Kryptonium	neg_64	0.842424213886261	0.00222003275351312
Parapedobacter	neg_64	0.854545474052429	0.00163680247839526
Ottowia	neg_64	-0.818181812763214	0.00381492051076338
Propionicimonas	neg_64	0.887542068958282	0.000609666476501403
Lawsonella	neg_64	0.802435338497162	0.00521145970824932
Rodentibacter	neg_64	0.915151536464691	0.000204472206099204
Palleronia	neg_64	-0.930095493793488	9.59607762942571e-05
Sinirhodobacter	neg_64	-0.830303013324738	0.00294022813612127
Microscilla	neg_64	0.951515138149261	2.27985739738035e-05
Limnobacter	neg_64	0.83890962600708	0.00241398974898654
Melghirimyces	neg_64	0.866666674613953	0.0011735379121256
Novimethylophilus	neg_64	0.890909075737	0.000542144516154419
Jiangella	neg_64	0.854545474052429	0.00163680247839526
Acidaminobacter	neg_64	0.866666674613953	0.0011735379121256
Trichormus	neg_64	-0.830303013324738	0.00294022813612127
Sideroxydans	neg_64	-0.842424213886261	0.00222003275351312
Lawsonella	neg_675	-0.844988703727722	0.00208579660703911
Variovorax	neg_675	-0.830303013324738	0.00294022813612127
Thermobifida	neg_677	-0.818181812763214	0.00381492051076338
Pakpunavirus	neg_677	0.863225877285004	0.00129381457010247
Ottowia	neg_677	-0.854545474052429	0.00163680247839526
Haliscomenobacter	neg_677	0.818181812763214	0.00381492051076338
Lihuaxuella	neg_677	0.903030276298523	0.000343612565232743
Candidatus_Sulfopaludibacter	neg_677	0.830303013324738	0.00294022813612127
Fimbriimonas	neg_677	0.818181812763214	0.00381492051076338
Thermopetrobacter	neg_677	0.818181812763214	0.00381492051076338
Candidatus_Arcanobacter	neg_677	0.854545474052429	0.00163680247839526
Catenovulum	neg_685	-0.806060612201691	0.0048620605246823
Kriegella	neg_685	0.818181812763214	0.00381492051076338
Brevinema	neg_685	0.842424213886261	0.00222003275351312
Limnobacter	neg_685	0.826751530170441	0.00317971472634282
Thermoanaerobacter	neg_685	0.878787875175476	0.000813862205061078
Lmd1virus	neg_685	-0.806643962860107	0.00480744414521128
Sideroxydans	neg_685	-0.806060612201691	0.0048620605246823
Litorimonas	neg_708	-0.806060612201691	0.0048620605246823
Porticoccus	neg_708	-0.915151536464691	0.000204472206099204
Anaerotignum	neg_71	-0.878787875175476	0.000813862205061078
Kriegella	neg_71	0.830303013324738	0.00294022813612127
Candidatus_Kryptonium	neg_71	0.878787875175476	0.000813862205061078
Zhihengliuella	neg_71	-0.830303013324738	0.00294022813612127
Lawsonella	neg_71	0.893621146678925	0.000491873064334847
Rodentibacter	neg_71	0.866666674613953	0.0011735379121256
Palleronia	neg_71	-0.948332667350769	2.92858403718732e-05
Sinirhodobacter	neg_71	-0.866666674613953	0.0011735379121256
Microscilla	neg_71	0.830303013324738	0.00294022813612127
Limnobacter	neg_71	0.802435338497162	0.00521145970824932
Melghirimyces	neg_71	0.854545474052429	0.00163680247839526
Izhakiella	neg_71	0.857146799564362	0.0015278405327328
Leminorella	neg_71	-0.818181812763214	0.00381492051076338
Anaerotignum	neg_726	-0.842424213886261	0.00222003275351312
Litorimonas	neg_726	0.818181812763214	0.00381492051076338
Haliscomenobacter	neg_726	0.806060612201691	0.0048620605246823
Zhihengliuella	neg_726	-0.842424213886261	0.00222003275351312
Lawsonella	neg_726	0.875383973121643	0.00090532610126548
Rodentibacter	neg_726	0.830303013324738	0.00294022813612127
Harryflintia	neg_726	0.806060612201691	0.0048620605246823
Izhakiella	neg_726	0.875383973121643	0.00090532610126548
Desulfocucumis	neg_726	-0.854545474052429	0.00163680247839526
Succinimonas	neg_726	-0.854545474052429	0.00163680247839526
Thermobifida	neg_727	-0.852824926376343	0.00171189540742711
Litorimonas	neg_727	0.901908397674561	0.000359290276283897
Brevinema	neg_727	0.877366662025452	0.000851188393096614
Candidatus_Tokpelaia	neg_727	0.80374151468277	0.00508357521208702
Haliscomenobacter	neg_727	0.889637529850006	0.000566964581027118
Zhihengliuella	neg_727	-0.901908397674561	0.000359290276283897
Lawsonella	neg_727	0.843112826347351	0.00218339276204738
Rodentibacter	neg_727	0.80374151468277	0.00508357521208702
Limnobacter	neg_727	0.85542106628418	0.00159951806374248
Lmd1virus	neg_727	-0.848254203796387	0.00192348015922827
Porticoccus	neg_727	0.816012322902679	0.0039891464803441
Succinimonas	neg_727	-0.865095794200897	0.00122739260821847
Thermobifida	neg_757	-0.818181812763214	0.00381492051076338
Litorimonas	neg_757	0.866666674613953	0.0011735379121256
Brevinema	neg_757	0.818181812763214	0.00381492051076338
Haliscomenobacter	neg_757	0.830303013324738	0.00294022813612127
Zhihengliuella	neg_757	-0.866666674613953	0.0011735379121256
Rodentibacter	neg_757	0.806060612201691	0.0048620605246823
Marivita	neg_757	-0.806060612201691	0.0048620605246823
Harryflintia	neg_757	0.830303013324738	0.00294022813612127
Desulfocucumis	neg_757	-0.830303013324738	0.00294022813612127
Porticoccus	neg_757	0.818181812763214	0.00381492051076338
Succinimonas	neg_757	-0.830303013324738	0.00294022813612127
Anaerotignum	neg_758	-0.818181812763214	0.00381492051076338
Erythrobacter	neg_758	0.878787875175476	0.000813862205061078
Kriegella	neg_758	0.890909075737	0.000542144516154419
Ottowia	neg_758	-0.854545474052429	0.00163680247839526
Propionicimonas	neg_758	0.887542068958282	0.000609666476501403
Rodentibacter	neg_758	0.854545474052429	0.00163680247839526
Palleronia	neg_758	-0.911858320236206	0.000237143587637378
Sinirhodobacter	neg_758	-0.806060612201691	0.0048620605246823
Larkinella	neg_758	0.830303013324738	0.00294022813612127
Microscilla	neg_758	0.927272737026215	0.000112034447641074
Limnobacter	neg_758	0.863225877285004	0.00129381457010247
Melghirimyces	neg_758	0.818181812763214	0.00381492051076338
Novimethylophilus	neg_758	0.866666674613953	0.0011735379121256
Jiangella	neg_758	0.830303013324738	0.00294022813612127
Acidaminobacter	neg_758	0.830303013324738	0.00294022813612127
Trichormus	neg_758	-0.806060612201691	0.0048620605246823
Fimbriimonas	neg_758	0.806060612201691	0.0048620605246823
Eah2virus	neg_758	0.833002269268036	0.00276710271221536
Mycolicibacter	neg_763	0.818181812763214	0.00381492051076338
Cvm10virus	neg_763	-0.806643962860107	0.00480744414521128
Beggiatoa	neg_763	-0.878787875175476	0.000813862205061078
Catenovulum	neg_769	0.903030276298523	0.000343612565232743
Kriegella	neg_769	-0.951515138149261	2.27985739738035e-05
Parapedobacter	neg_769	-0.830303013324738	0.00294022813612127
Propionicimonas	neg_769	-0.911858320236206	0.000237143587637378
Microscilla	neg_769	-0.842424213886261	0.00222003275351312
Limnobacter	neg_769	-0.911858320236206	0.000237143587637378
Thermoanaerobacter	neg_769	-0.890909075737	0.000542144516154419
Jiangella	neg_769	-0.818181812763214	0.00381492051076338
Negativicoccus	neg_769	0.818181812763214	0.00381492051076338
Acidaminobacter	neg_769	-0.818181812763214	0.00381492051076338
Trichormus	neg_769	0.842424213886261	0.00222003275351312
Sideroxydans	neg_769	0.878787875175476	0.000813862205061078
Mailhella	neg_769	0.818181812763214	0.00381492051076338
Synergistes	neg_769	0.903030276298523	0.000343612565232743
Flexilinea	neg_769	0.818181812763214	0.00381492051076338
Eah2virus	neg_769	-0.846658051013947	0.00200163182665913
Mongoliibacter	neg_771	-0.915151536464691	0.000204472206099204
Candidatus_Symbiobacter	neg_771	-0.842424213886261	0.00222003275351312
Thermobifida	neg_781	0.818181812763214	0.00381492051076338
Stappia	neg_781	-0.818181812763214	0.00381492051076338
Anaerotignum	neg_781	0.866666674613953	0.0011735379121256
Ottowia	neg_781	0.842424213886261	0.00222003275351312
Haliscomenobacter	neg_781	-0.806060612201691	0.0048620605246823
Lihuaxuella	neg_781	-0.939393937587738	5.48405364009241e-05
Rodentibacter	neg_781	-0.818181812763214	0.00381492051076338
Candidatus_Sulfopaludibacter	neg_781	-0.878787875175476	0.000813862205061078
Palleronia	neg_781	0.814593434333801	0.00410613103846336
Acetivibrio	neg_781	0.806060612201691	0.0048620605246823
Melghirimyces	neg_781	-0.806060612201691	0.0048620605246823
Dolosicoccus	neg_781	0.806060612201691	0.0048620605246823
Izhakiella	neg_781	-0.899700224399567	0.000391673296721073
Thermopetrobacter	neg_781	-0.806060612201691	0.0048620605246823
Desulfocucumis	neg_781	0.854545474052429	0.00163680247839526
Succinimonas	neg_781	0.806060612201691	0.0048620605246823
Candidatus_Arcanobacter	neg_781	-0.878787875175476	0.000813862205061078
Brevinema	neg_783	-0.878787875175476	0.000813862205061078
Candidatus_Tokpelaia	neg_783	-0.830303013324738	0.00294022813612127
Candidatus_Sulfopaludibacter	neg_783	-0.818181812763214	0.00381492051076338
Kordiimonas	neg_783	-0.866666674613953	0.0011735379121256
Dolosicoccus	neg_783	0.806060612201691	0.0048620605246823
Candidatus_Electrothrix	neg_783	-0.915151536464691	0.000204472206099204
Rubrivivax	neg_783	0.806060612201691	0.0048620605246823
Thermobifida	neg_794	-0.866666674613953	0.0011735379121256
Litorimonas	neg_794	0.854545474052429	0.00163680247839526
Brevinema	neg_794	0.830303013324738	0.00294022813612127
Haliscomenobacter	neg_794	0.878787875175476	0.000813862205061078
Zhihengliuella	neg_794	-0.878787875175476	0.000813862205061078
Lmd1virus	neg_794	-0.806643962860107	0.00480744414521128
Porticoccus	neg_794	0.806060612201691	0.0048620605246823
Succinimonas	neg_794	-0.830303013324738	0.00294022813612127
Stappia	neg_84	-0.806060612201691	0.0048620605246823
Anaerotignum	neg_84	0.818181812763214	0.00381492051076338
Candidatus_Kryptonium	neg_84	-0.818181812763214	0.00381492051076338
Haliscomenobacter	neg_84	-0.818181812763214	0.00381492051076338
Lawsonella	neg_84	-0.942253589630127	4.53587077142714e-05
Palleronia	neg_84	0.826751530170441	0.00317971472634282
Dethiosulfovibrio	neg_84	0.806060612201691	0.0048620605246823
Izhakiella	neg_84	-0.857146799564362	0.0015278405327328
Succinimonas	neg_84	0.866666674613953	0.0011735379121256
Amantichitinum	neg_84	-0.842424213886261	0.00222003275351312
Chloroflexus	neg_842	0.830303013324738	0.00294022813612127
Candidatus_Tokpelaia	neg_842	0.830303013324738	0.00294022813612127
Pakpunavirus	neg_842	0.802435338497162	0.00521145970824932
Haliscomenobacter	neg_842	0.806060612201691	0.0048620605246823
Pararhodospirillum	neg_842	0.818181812763214	0.00381492051076338
Halothiobacillus	neg_842	-0.842424213886261	0.00222003275351312
Parafilimonas	neg_842	-0.915151536464691	0.000204472206099204
Succinimonas	neg_842	-0.806060612201691	0.0048620605246823
Candidatus_Tokpelaia	neg_846	-0.808135211467743	0.00466981917809761
Zhihengliuella	neg_846	0.808135211467743	0.00466981917809761
Rodentibacter	neg_846	-0.821065366268158	0.00359188206024896
Candidatus_Sulfopaludibacter	neg_846	-0.846925735473633	0.0019883679465349
Kordiimonas	neg_846	-0.859855890274048	0.00142005806532719
Pararhodospirillum	neg_846	-0.898646354675293	0.000407860267078952
Dolosicoccus	neg_846	0.846925735473633	0.0019883679465349
Candidatus_Electrothrix	neg_846	-0.859855890274048	0.00142005806532719
Thermopetrobacter	neg_846	-0.924506723880768	0.000129632545059266
Anaerotignum	neg_861	-0.830303013324738	0.00294022813612127
Litorimonas	neg_861	0.854545474052429	0.00163680247839526
Haliscomenobacter	neg_861	0.818181812763214	0.00381492051076338
Zhihengliuella	neg_861	-0.806060612201691	0.0048620605246823
Lawsonella	neg_861	0.802435338497162	0.00521145970824932
Rodentibacter	neg_861	0.806060612201691	0.0048620605246823
Larkinella	neg_861	0.830303013324738	0.00294022813612127
Harryflintia	neg_861	0.890909075737	0.000542144516154419
Izhakiella	neg_861	0.875383973121643	0.00090532610126548
Desulfocucumis	neg_861	-0.830303013324738	0.00294022813612127
Porticoccus	neg_861	0.842424213886261	0.00222003275351312
Succinimonas	neg_861	-0.866666674613953	0.0011735379121256
Anaerotignum	neg_911	-0.927272737026215	0.000112034447641074
Candidatus_Kryptonium	neg_911	0.830303013324738	0.00294022813612127
Brevinema	neg_911	0.806060612201691	0.0048620605246823
Parapedobacter	neg_911	0.818181812763214	0.00381492051076338
Haliscomenobacter	neg_911	0.818181812763214	0.00381492051076338
Zhihengliuella	neg_911	-0.878787875175476	0.000813862205061078
Lihuaxuella	neg_911	0.830303013324738	0.00294022813612127
Lawsonella	neg_911	0.911858320236206	0.000237143587637378
Rodentibacter	neg_911	0.903030276298523	0.000343612565232743
Palleronia	neg_911	-0.899700224399567	0.000391673296721073
Marivita	neg_911	-0.806060612201691	0.0048620605246823
Microscilla	neg_911	0.806060612201691	0.0048620605246823
Melghirimyces	neg_911	0.842424213886261	0.00222003275351312
Izhakiella	neg_911	0.936174511909485	6.71888372667517e-05
Desulfocucumis	neg_911	-0.830303013324738	0.00294022813612127
Succinimonas	neg_911	-0.866666674613953	0.0011735379121256
Candidatus_Arcanobacter	neg_911	0.830303013324738	0.00294022813612127
Erythrobacter	neg_919	0.806060612201691	0.0048620605246823
Kriegella	neg_919	0.854545474052429	0.00163680247839526
Ottowia	neg_919	-0.854545474052429	0.00163680247839526
Propionicimonas	neg_919	0.83890962600708	0.00241398974898654
Palleronia	neg_919	-0.887542068958282	0.000609666476501403
Sinirhodobacter	neg_919	-0.818181812763214	0.00381492051076338
Larkinella	neg_919	0.806060612201691	0.0048620605246823
Microscilla	neg_919	0.830303013324738	0.00294022813612127
Limnobacter	neg_919	0.899700224399567	0.000391673296721073
Marmoricola	neg_919	-0.854545474052429	0.00163680247839526
Mailhella	neg_919	-0.806060612201691	0.0048620605246823
Fimbriimonas	neg_919	0.806060612201691	0.0048620605246823
Leminorella	neg_919	-0.830303013324738	0.00294022813612127
Eah2virus	neg_919	0.846658051013947	0.00200163182665913
Thermobifida	neg_94	0.818181812763214	0.00381492051076338
Stappia	neg_94	-0.818181812763214	0.00381492051076338
Anaerotignum	neg_94	0.866666674613953	0.0011735379121256
Ottowia	neg_94	0.842424213886261	0.00222003275351312
Haliscomenobacter	neg_94	-0.806060612201691	0.0048620605246823
Lihuaxuella	neg_94	-0.939393937587738	5.48405364009241e-05
Rodentibacter	neg_94	-0.818181812763214	0.00381492051076338
Candidatus_Sulfopaludibacter	neg_94	-0.878787875175476	0.000813862205061078
Palleronia	neg_94	0.814593434333801	0.00410613103846336
Acetivibrio	neg_94	0.806060612201691	0.0048620605246823
Melghirimyces	neg_94	-0.806060612201691	0.0048620605246823
Dolosicoccus	neg_94	0.806060612201691	0.0048620605246823
Izhakiella	neg_94	-0.899700224399567	0.000391673296721073
Thermopetrobacter	neg_94	-0.806060612201691	0.0048620605246823
Desulfocucumis	neg_94	0.854545474052429	0.00163680247839526
Succinimonas	neg_94	0.806060612201691	0.0048620605246823
Candidatus_Arcanobacter	neg_94	-0.878787875175476	0.000813862205061078
Stappia	neg_985	0.842424213886261	0.00222003275351312
Caloramator	neg_985	0.915151536464691	0.000204472206099204
Anaerotignum	neg_985	-0.806060612201691	0.0048620605246823
Erythrobacter	neg_985	0.818181812763214	0.00381492051076338
Litorimonas	neg_985	0.818181812763214	0.00381492051076338
Brevinema	neg_985	0.830303013324738	0.00294022813612127
Candidatus_Tokpelaia	neg_985	0.806060612201691	0.0048620605246823
Zhihengliuella	neg_985	-0.806060612201691	0.0048620605246823
Lawsonella	neg_985	0.881463050842285	0.000746860533753502
Rodentibacter	neg_985	0.866666674613953	0.0011735379121256
Marivita	neg_985	-0.878787875175476	0.000813862205061078
Acetivibrio	neg_985	-0.818181812763214	0.00381492051076338
Trichormus	neg_985	-0.818181812763214	0.00381492051076338
Candidatus_Electrothrix	neg_985	0.806060612201691	0.0048620605246823
Desulfocucumis	neg_985	-0.806060612201691	0.0048620605246823
Mudcatvirus	neg_985	0.818181812763214	0.00381492051076338
Eah2virus	neg_985	0.805690705776215	0.00489692183645341
Thermobifida	neg_994	-0.854545474052429	0.00163680247839526
Stappia	neg_994	0.842424213886261	0.00222003275351312
Brevinema	neg_994	0.818181812763214	0.00381492051076338
Chloroflexus	neg_994	0.878787875175476	0.000813862205061078
Mycolicibacter	neg_994	-0.842424213886261	0.00222003275351312
Candidatus_Tokpelaia	neg_994	0.903030276298523	0.000343612565232743
Pakpunavirus	neg_994	0.911858320236206	0.000237143587637378
Ottowia	neg_994	-0.842424213886261	0.00222003275351312
Haliscomenobacter	neg_994	0.830303013324738	0.00294022813612127
Candidatus_Sulfopaludibacter	neg_994	0.878787875175476	0.000813862205061078
Kordiimonas	neg_994	0.842424213886261	0.00222003275351312
Pararhodospirillum	neg_994	0.866666674613953	0.0011735379121256
Comamonas	neg_994	-0.866666674613953	0.0011735379121256
Candidatus_Electrothrix	neg_994	0.927272737026215	0.000112034447641074
Thermopetrobacter	neg_994	0.842424213886261	0.00222003275351312
Rubrivivax	neg_994	-0.818181812763214	0.00381492051076338
Parafilimonas	neg_994	-0.866666674613953	0.0011735379121256
