# Supplementary material for: Multi-omics analyses reveal that the gut microbiome and its metabolites promote milk fat synthesis in Zhongdian yak cows
Source: PeerJ journal article supplement (doi:10.7717/peerj.14444), 2022-12-02
Supplement: neg_biomarker_Web_Report.zip [file treat1_H_L.vs.H_L_taxonomy_cor_filter.xls]

genusName	metaName	CC	CCP
Chloroflexus	neg_1004	-0.856668412685394	0.00154747182074688
Pararhodospirillum	neg_1004	-0.825403153896332	0.00327420560319291
Thermosyntropha	neg_1004	-0.800390899181366	0.0054162086926719
Parafilimonas	neg_1004	0.894186735153198	0.000481835628326488
Emticicia	neg_1062	-0.830303013324738	0.00294022813612127
Brevinema	neg_1065	0.806060612201691	0.0048620605246823
Candidatus_Sulfopaludibacter	neg_1065	0.842424213886261	0.00222003275351312
Comamonas	neg_1065	-0.830303013324738	0.00294022813612127
Candidatus_Electrothrix	neg_1065	0.818181812763214	0.00381492051076338
