# Supplementary figures and images for: Multi-omics analyses reveal that the gut microbiome and its metabolites promote milk fat synthesis in Zhongdian yak cows
Source: PeerJ journal article supplement (doi:10.7717/peerj.14444), 2022-12-02

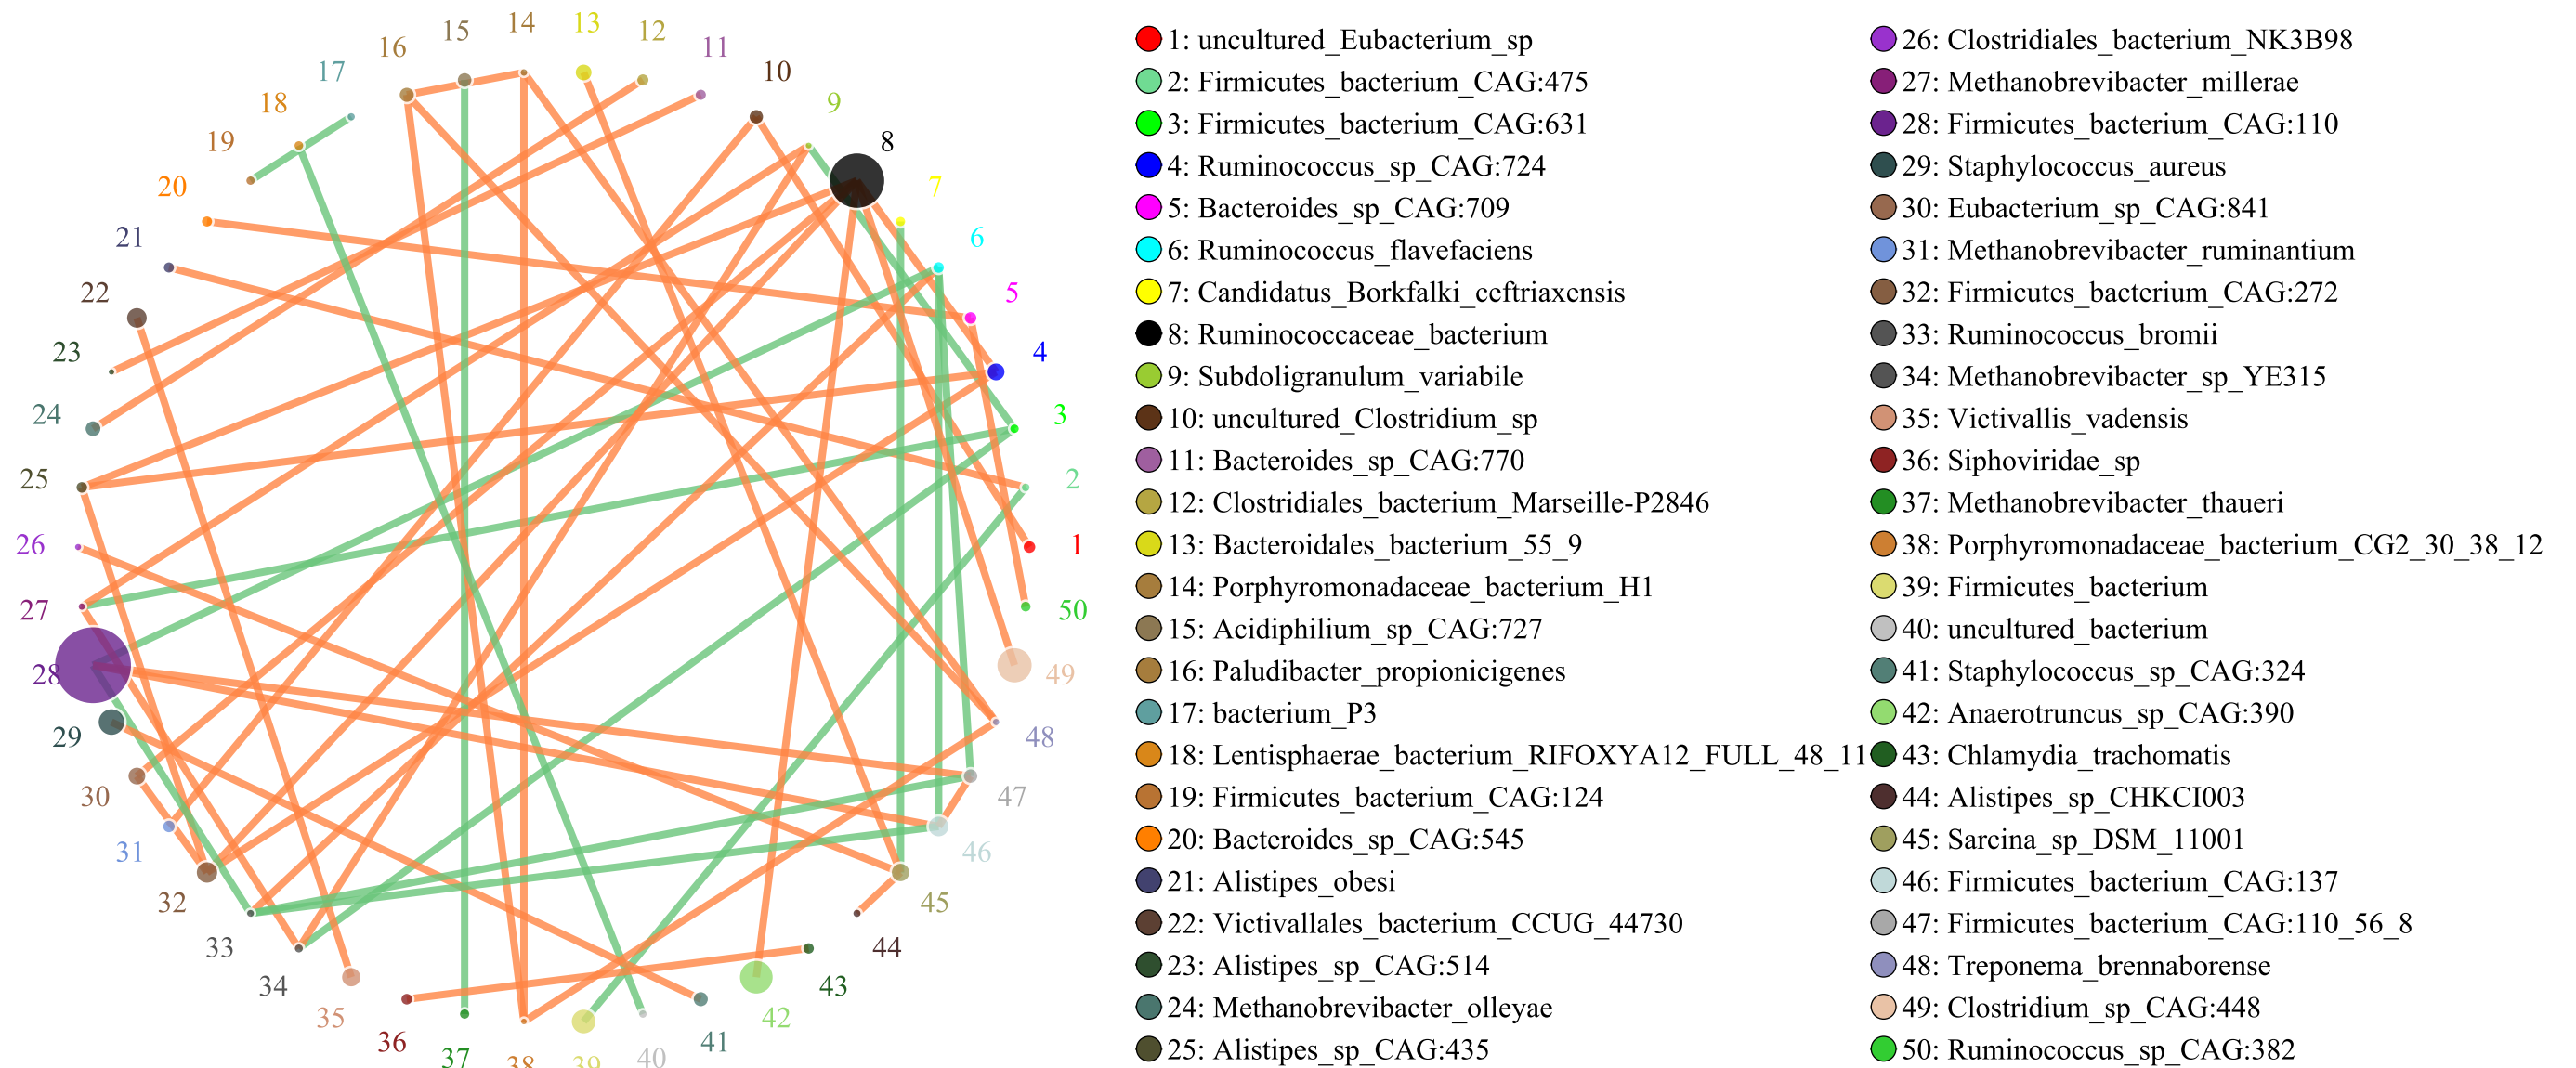

Supplement: H__.zip [file network.pdf › network.pdf]

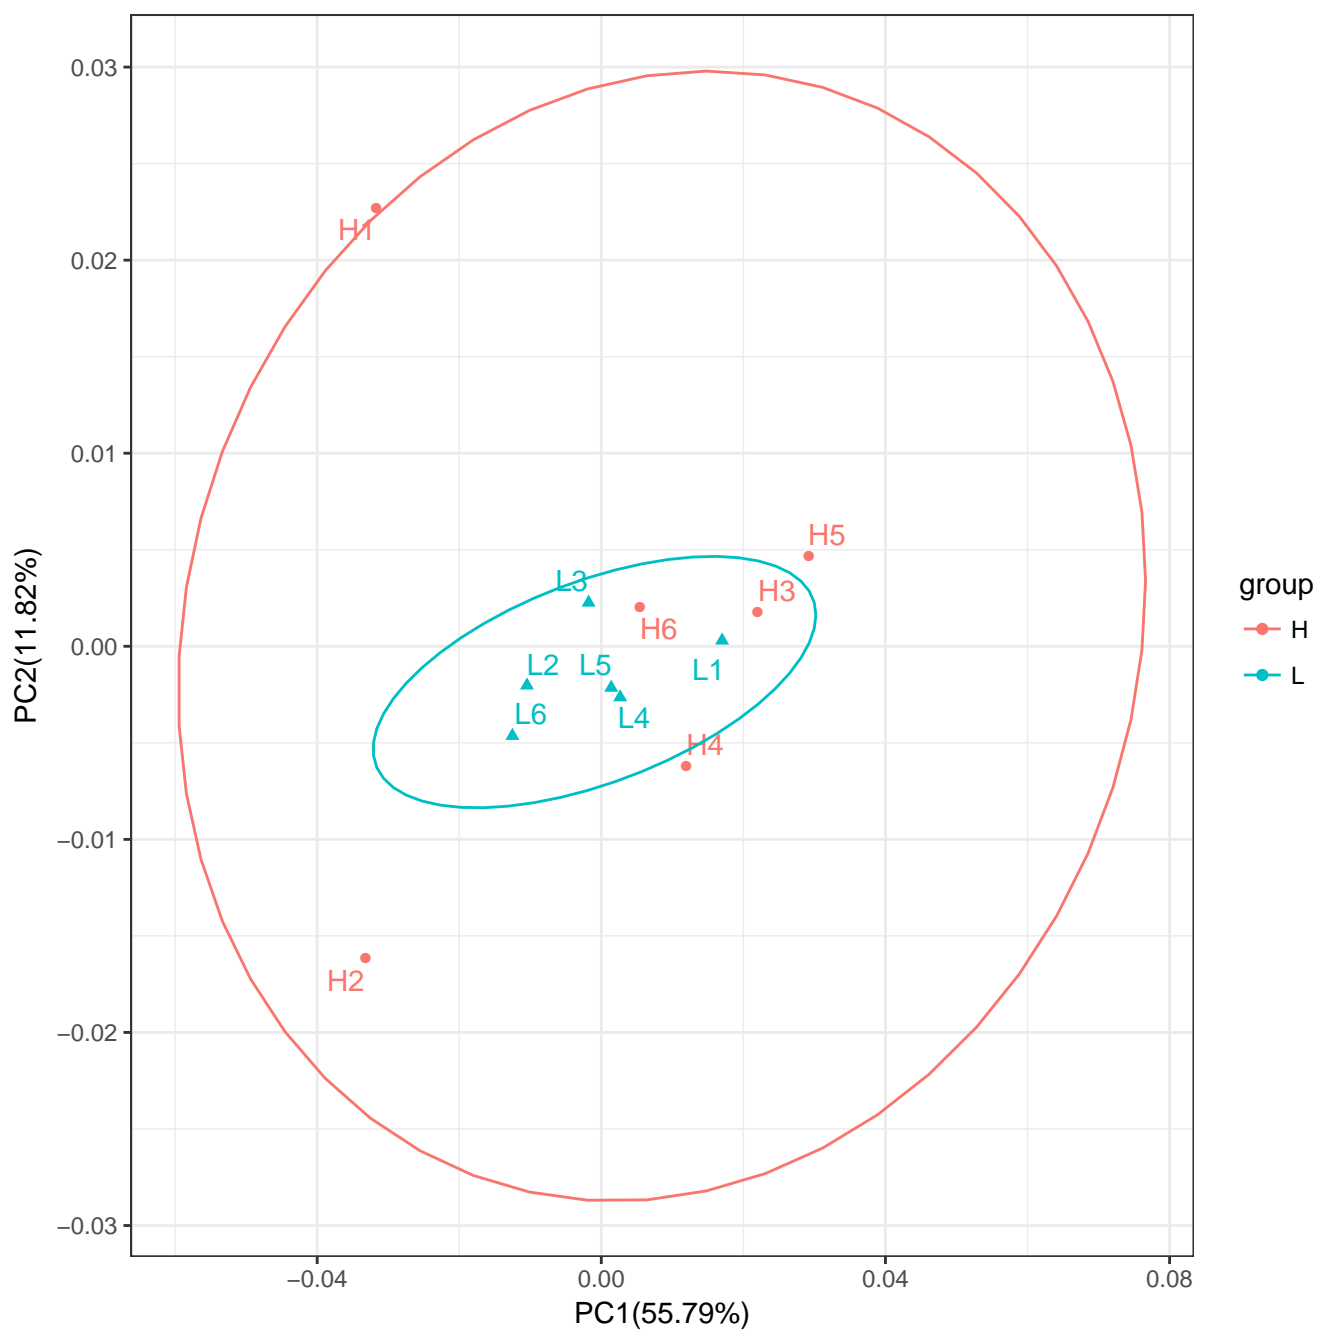

Supplement: biomarker_Web_Report_.zip [file All_pca.pdf › Web_Report/Data_assess/PCA/All_pca.pdf]

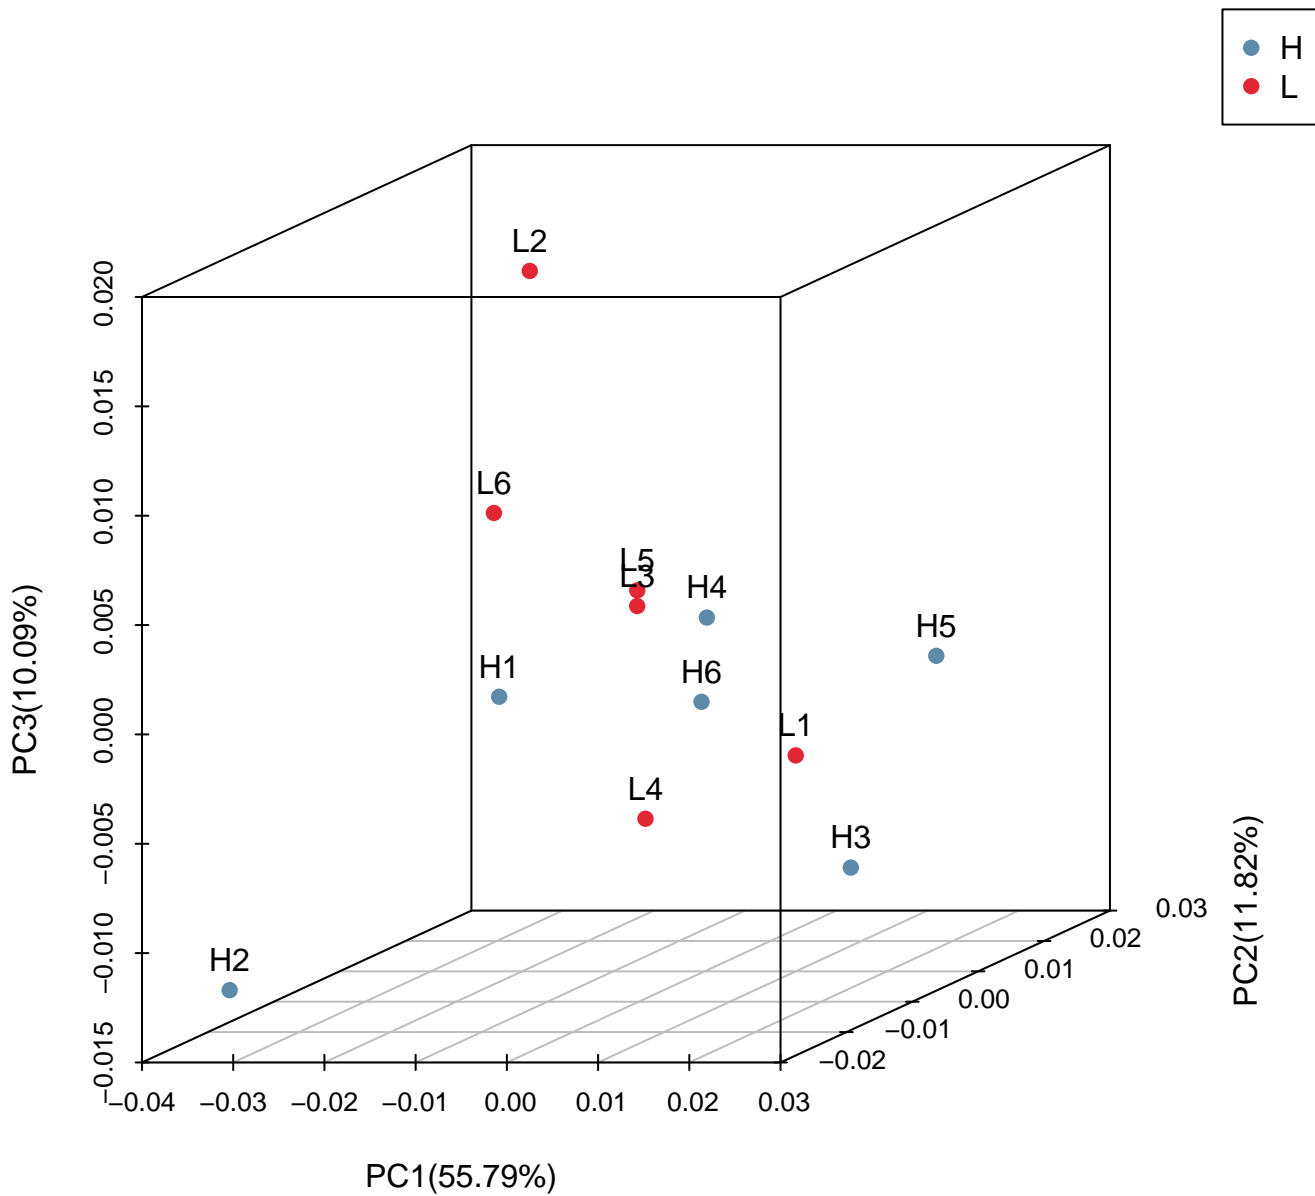

Supplement: biomarker_Web_Report_.zip [file All_pca3D.pdf › Web_Report/Data_assess/PCA/All_pca3D.pdf]

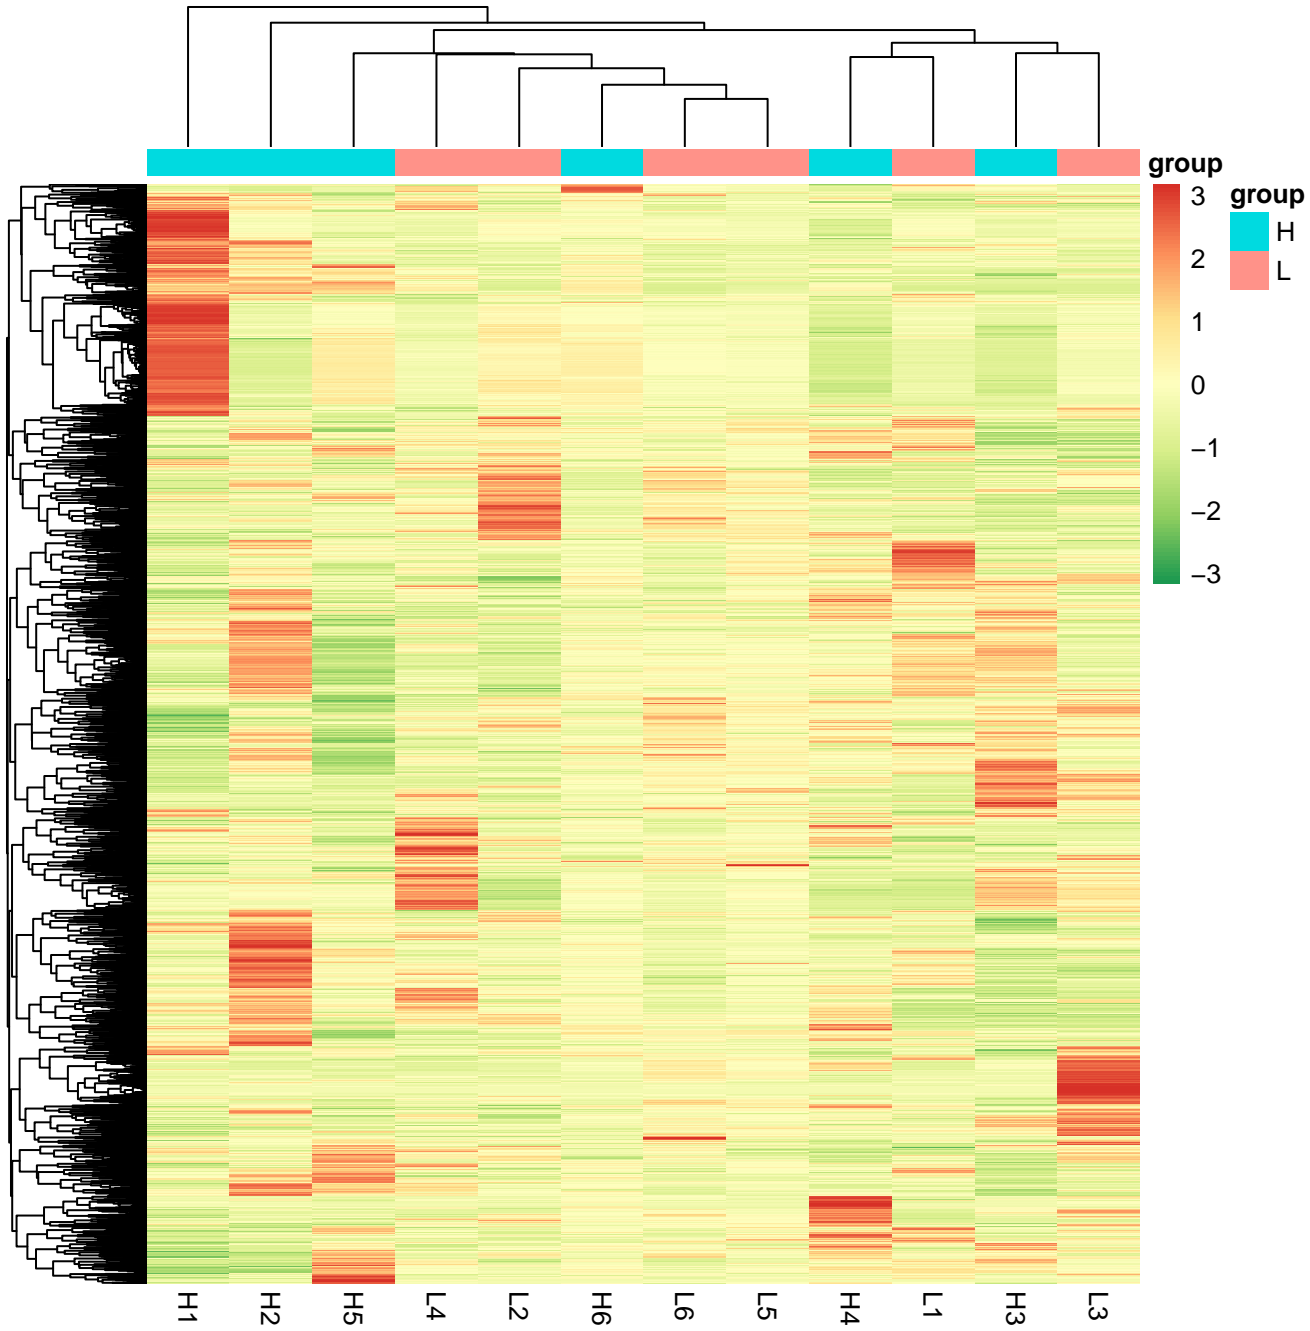

Supplement: biomarker_Web_Report_.zip [file All_heatmap.pdf › Web_Report/Data_assess/heatmap/All_heatmap.pdf]

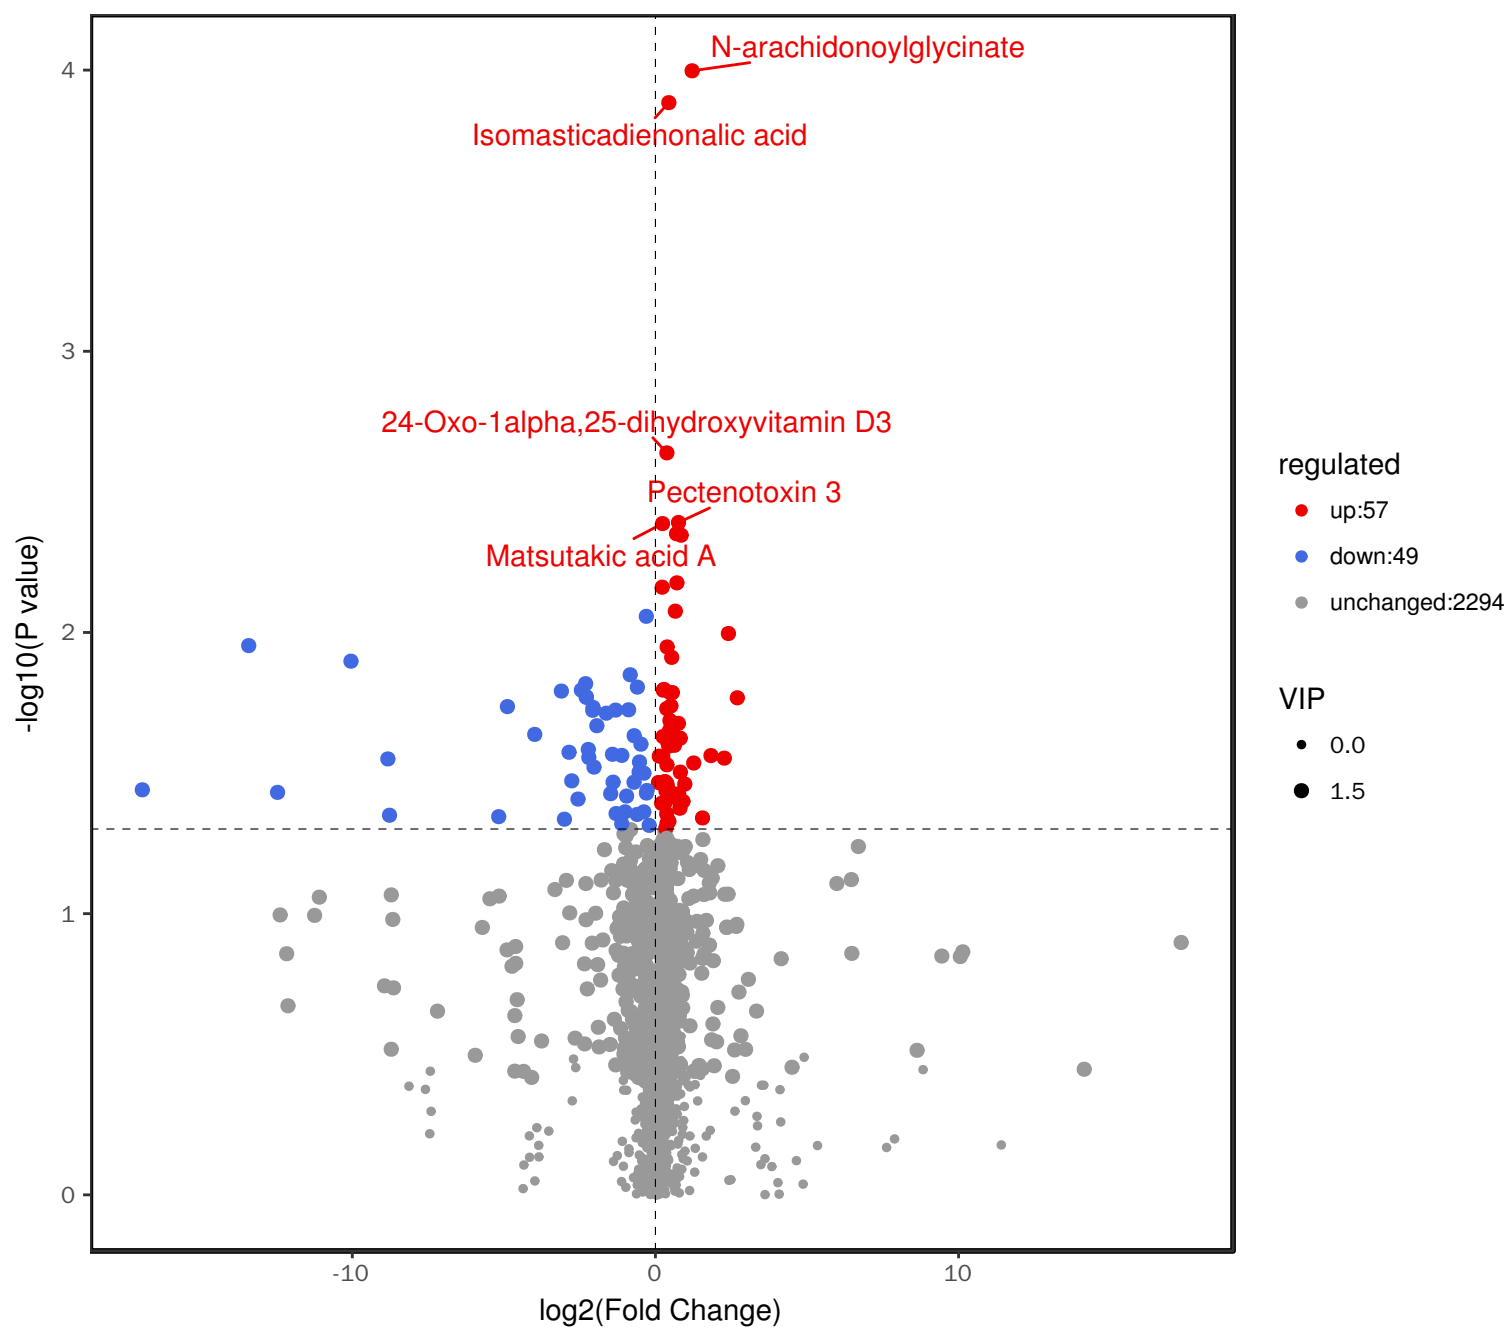

Supplement: biomarker_Web_Report_.zip [file H_vs_L.volcano.pdf › Web_Report/Diff_analysis/H_vs_L/H_vs_L.volcano.pdf]

# Scores (OPLS-DA)

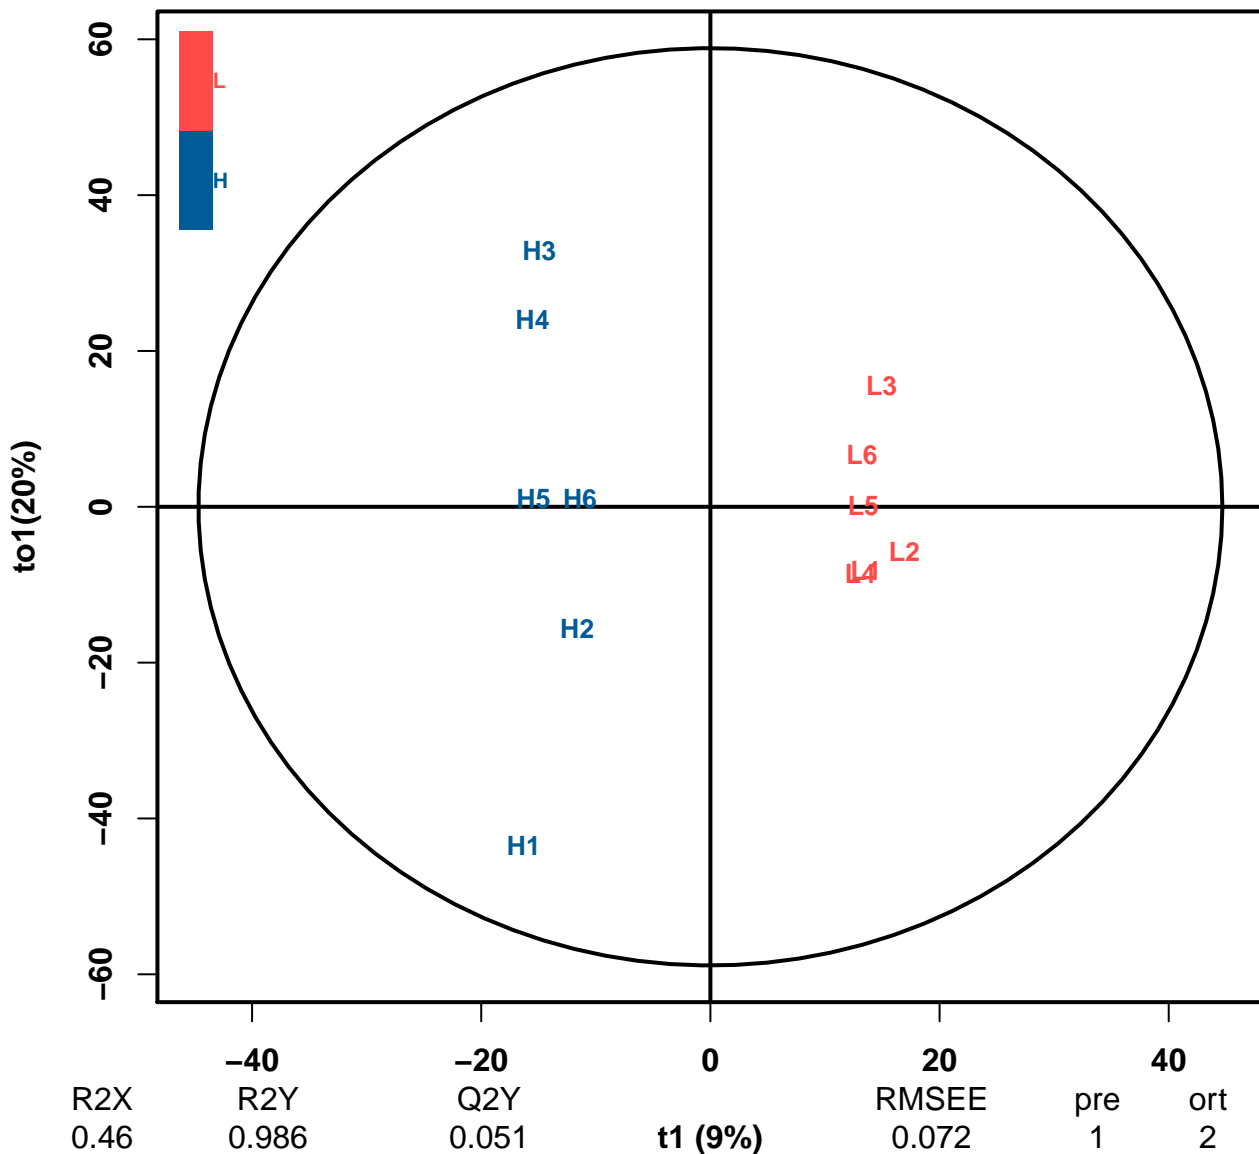

Supplement: biomarker_Web_Report_.zip [file H_vs_L_OPLS_DA.pdf › Web_Report/Diff_analysis/H_vs_L/H_vs_L_OPLS_DA.pdf]

# Scores (OPLS-DA)

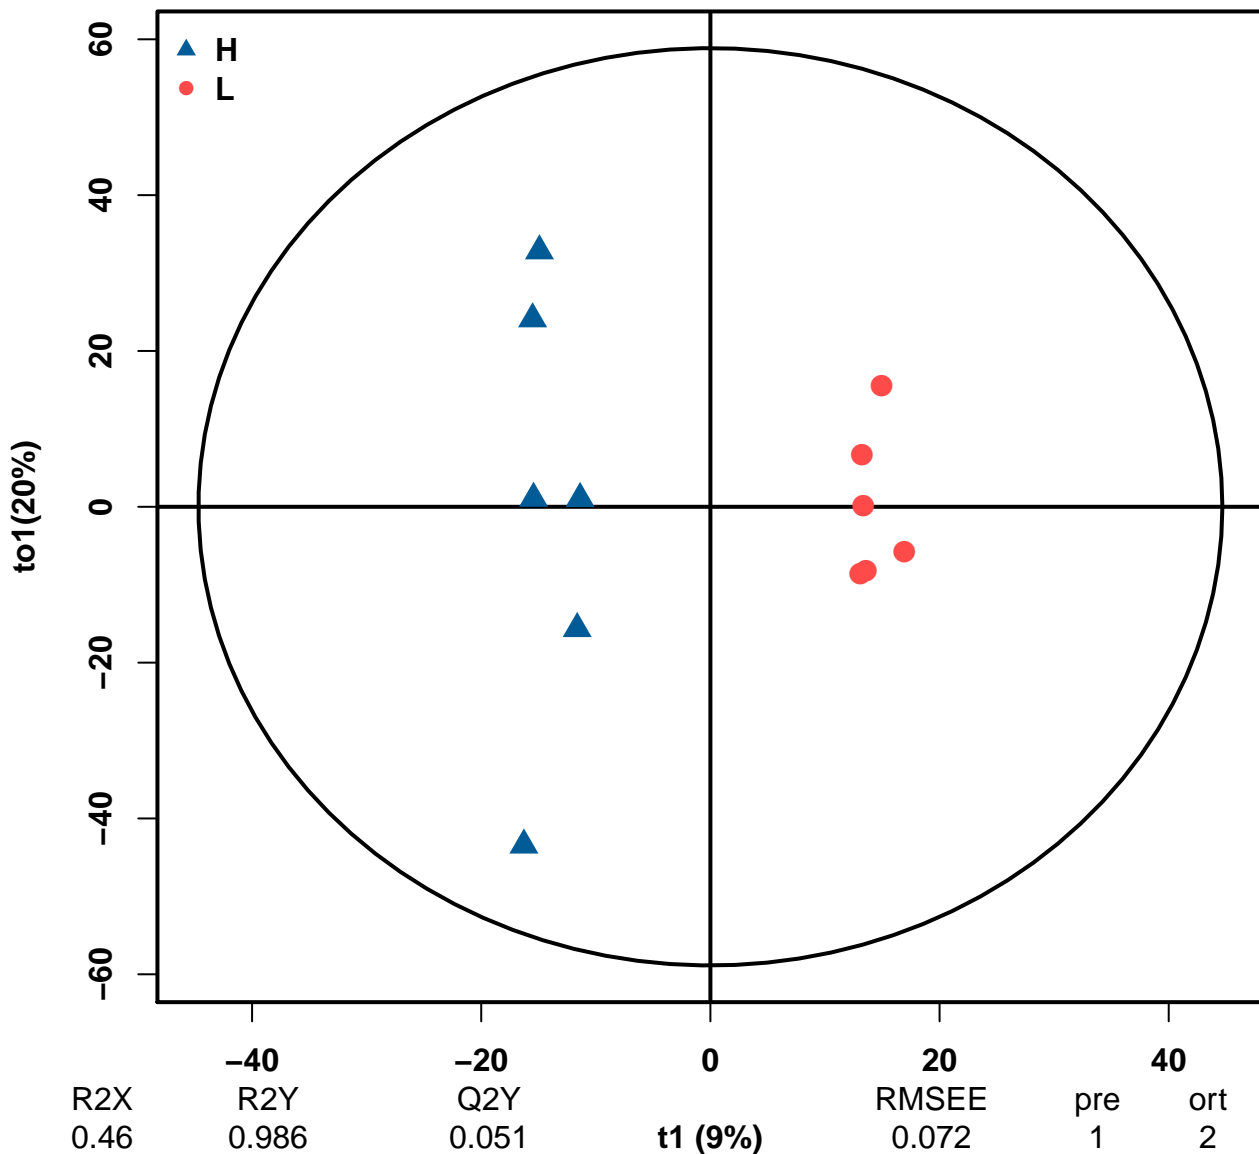

Supplement: biomarker_Web_Report_.zip [file H_vs_L_OPLS_DA_nolabel.pdf › Web_Report/Diff_analysis/H_vs_L/H_vs_L_OPLS_DA_nolabel.pdf]

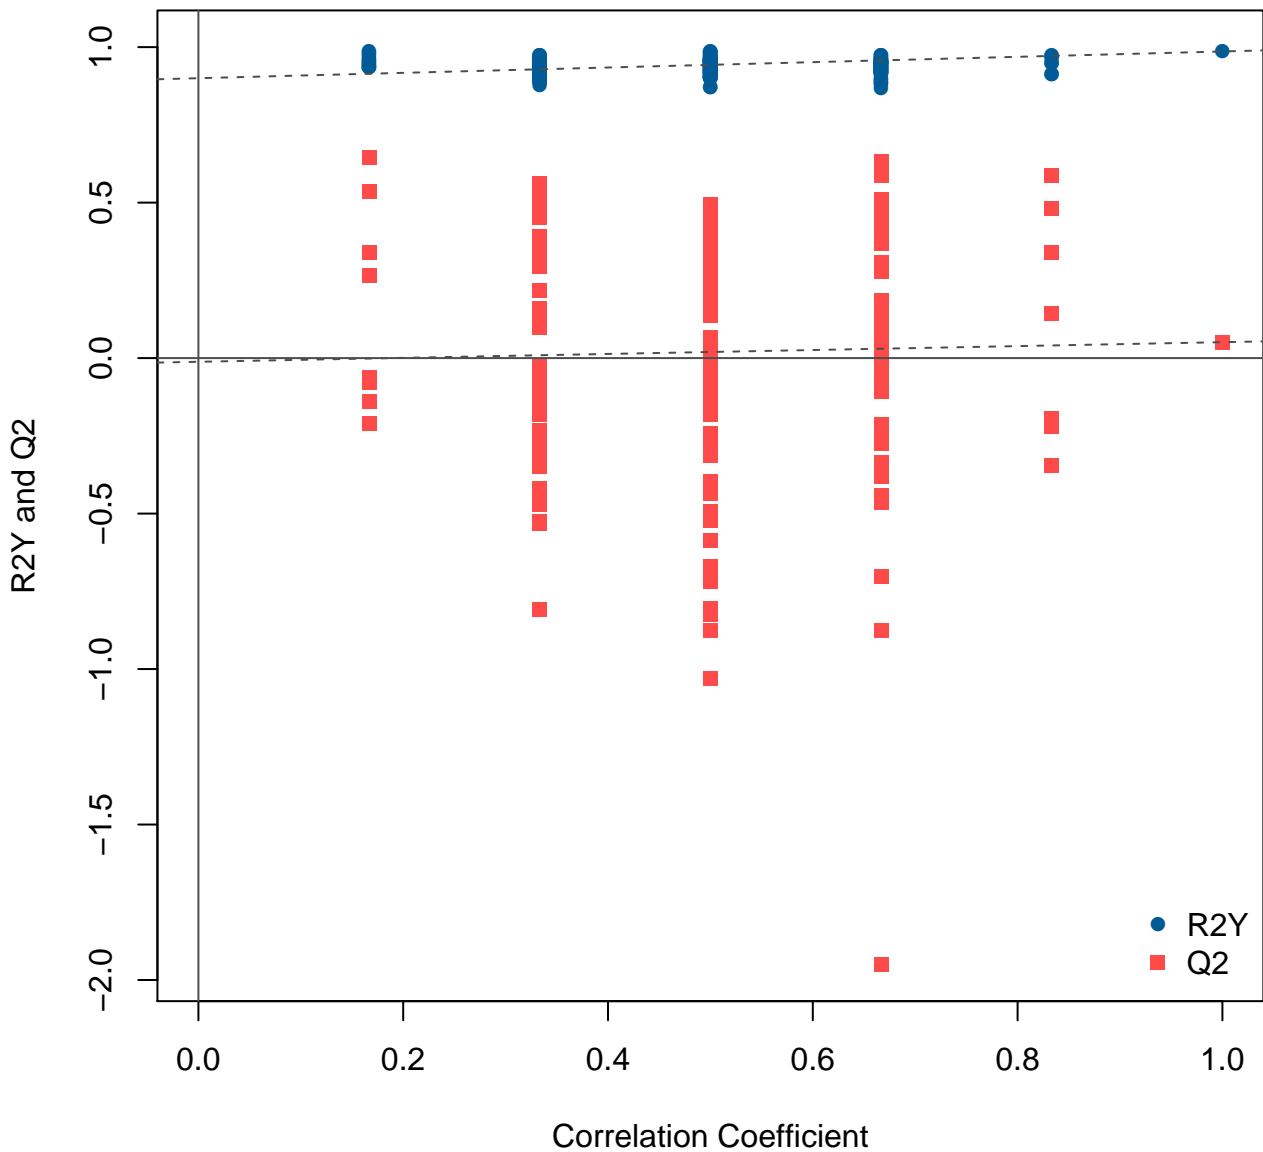

Supplement: biomarker_Web_Report_.zip [file H_vs_L_OPLS_DA_permutation.pdf › Web_Report/Diff_analysis/H_vs_L/H_vs_L_OPLS_DA_permutation.pdf]

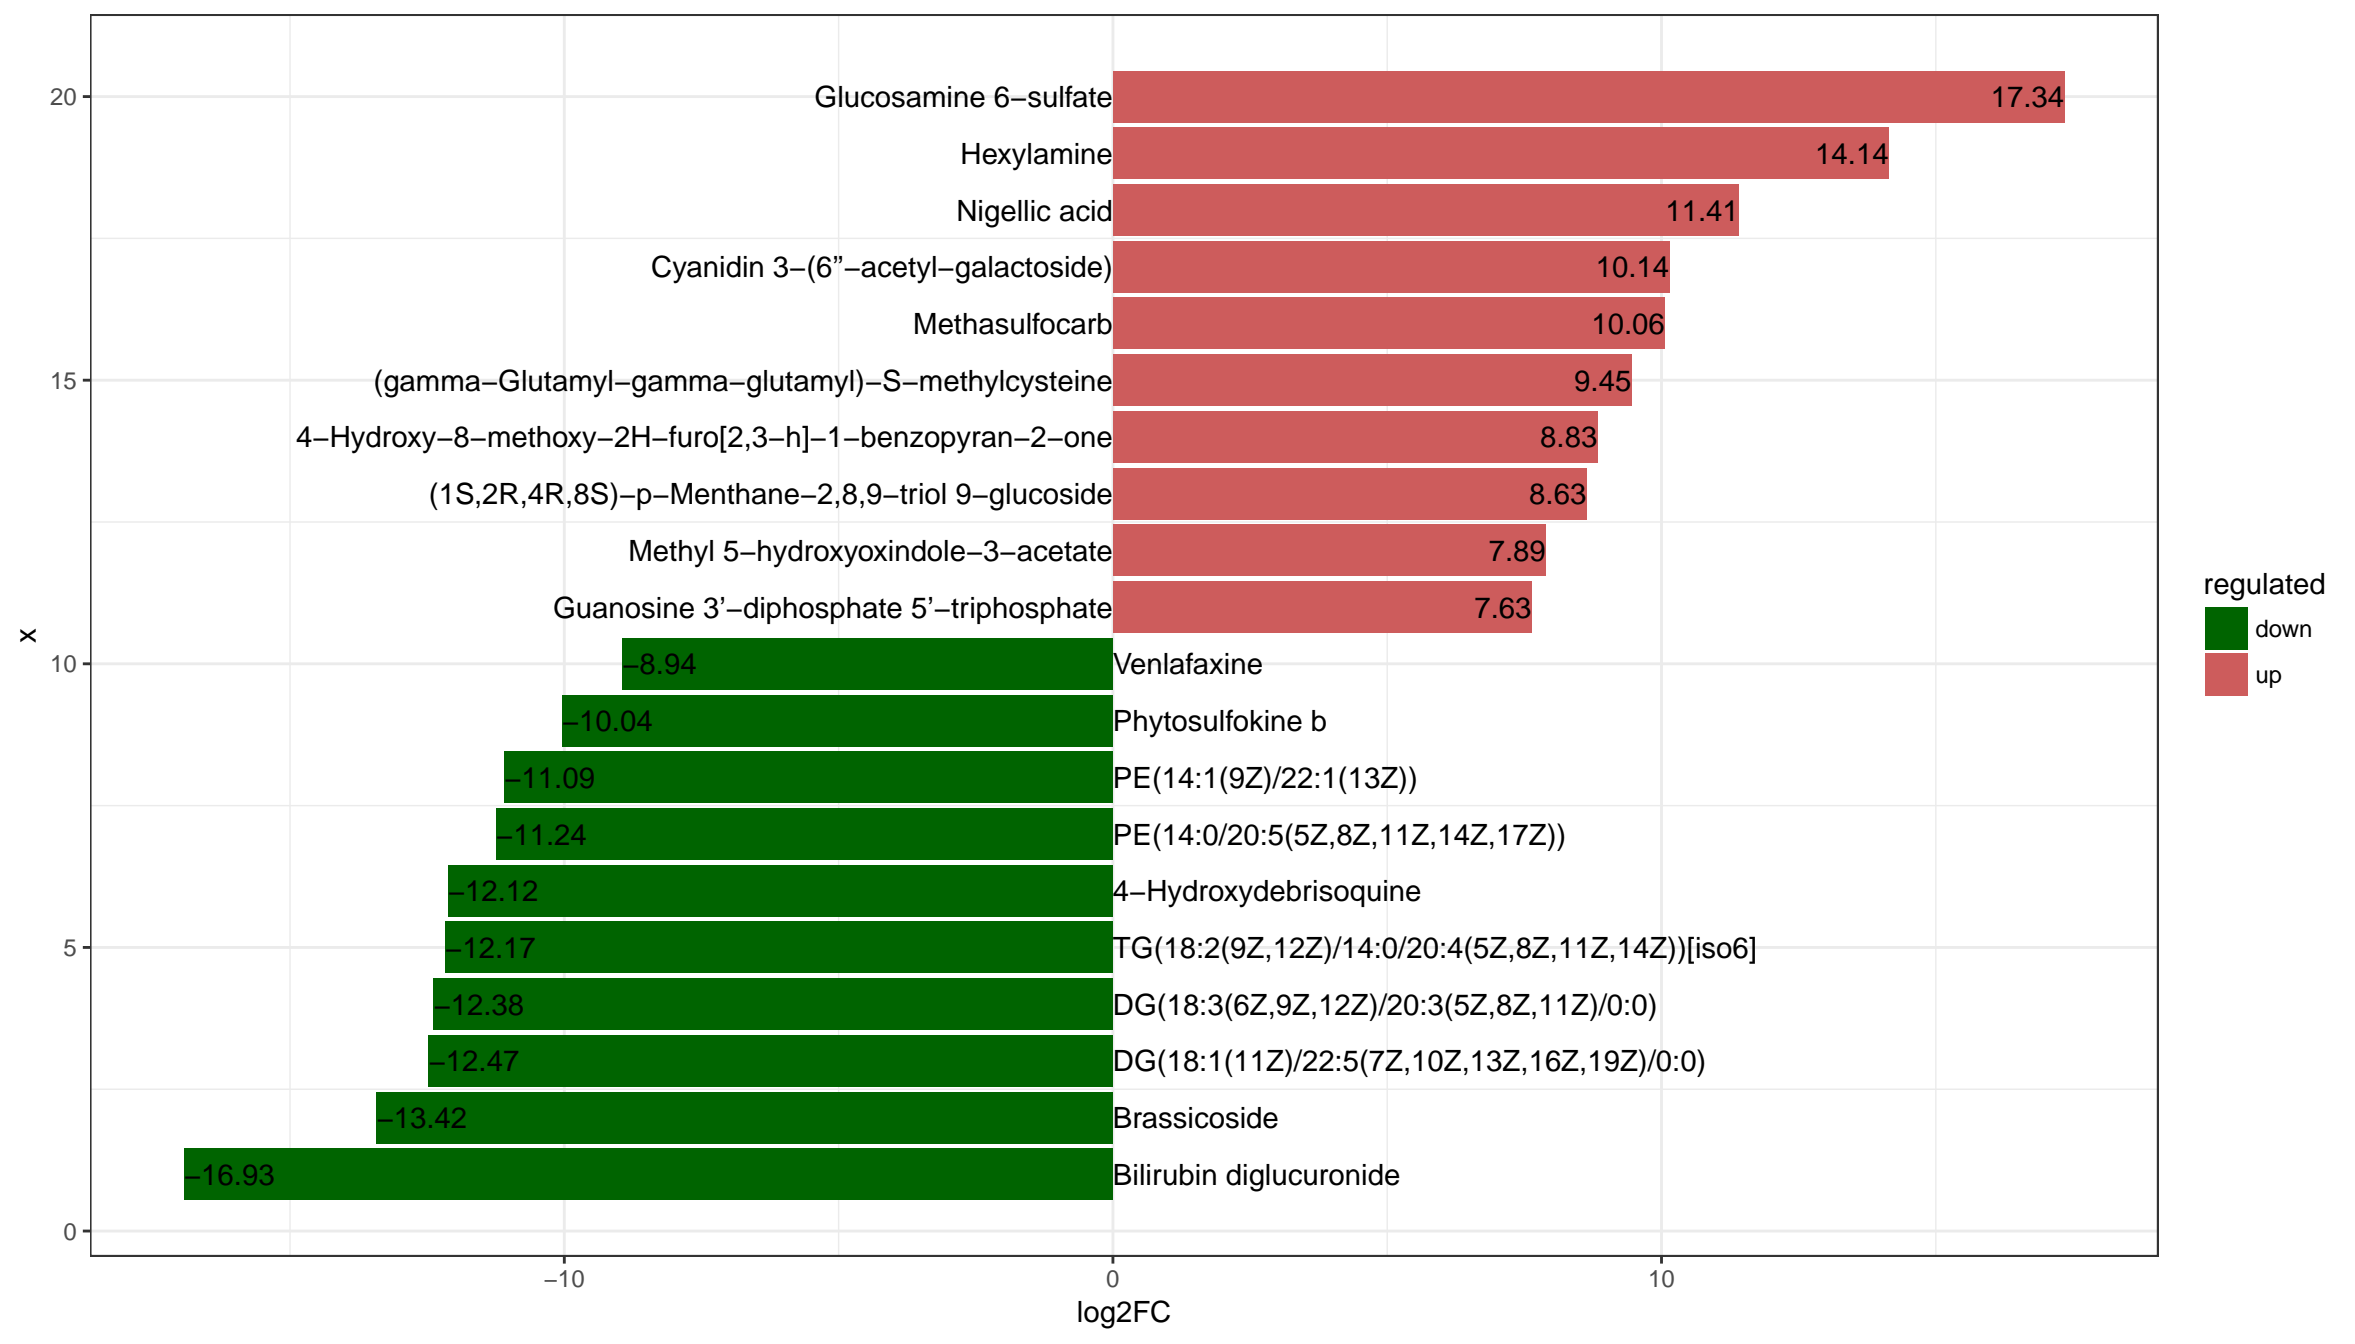

Supplement: biomarker_Web_Report_.zip [file H_vs_L_Top_20_FC_change.pdf › Web_Report/Diff_analysis/H_vs_L/H_vs_L_Top_20_FC_change.pdf]

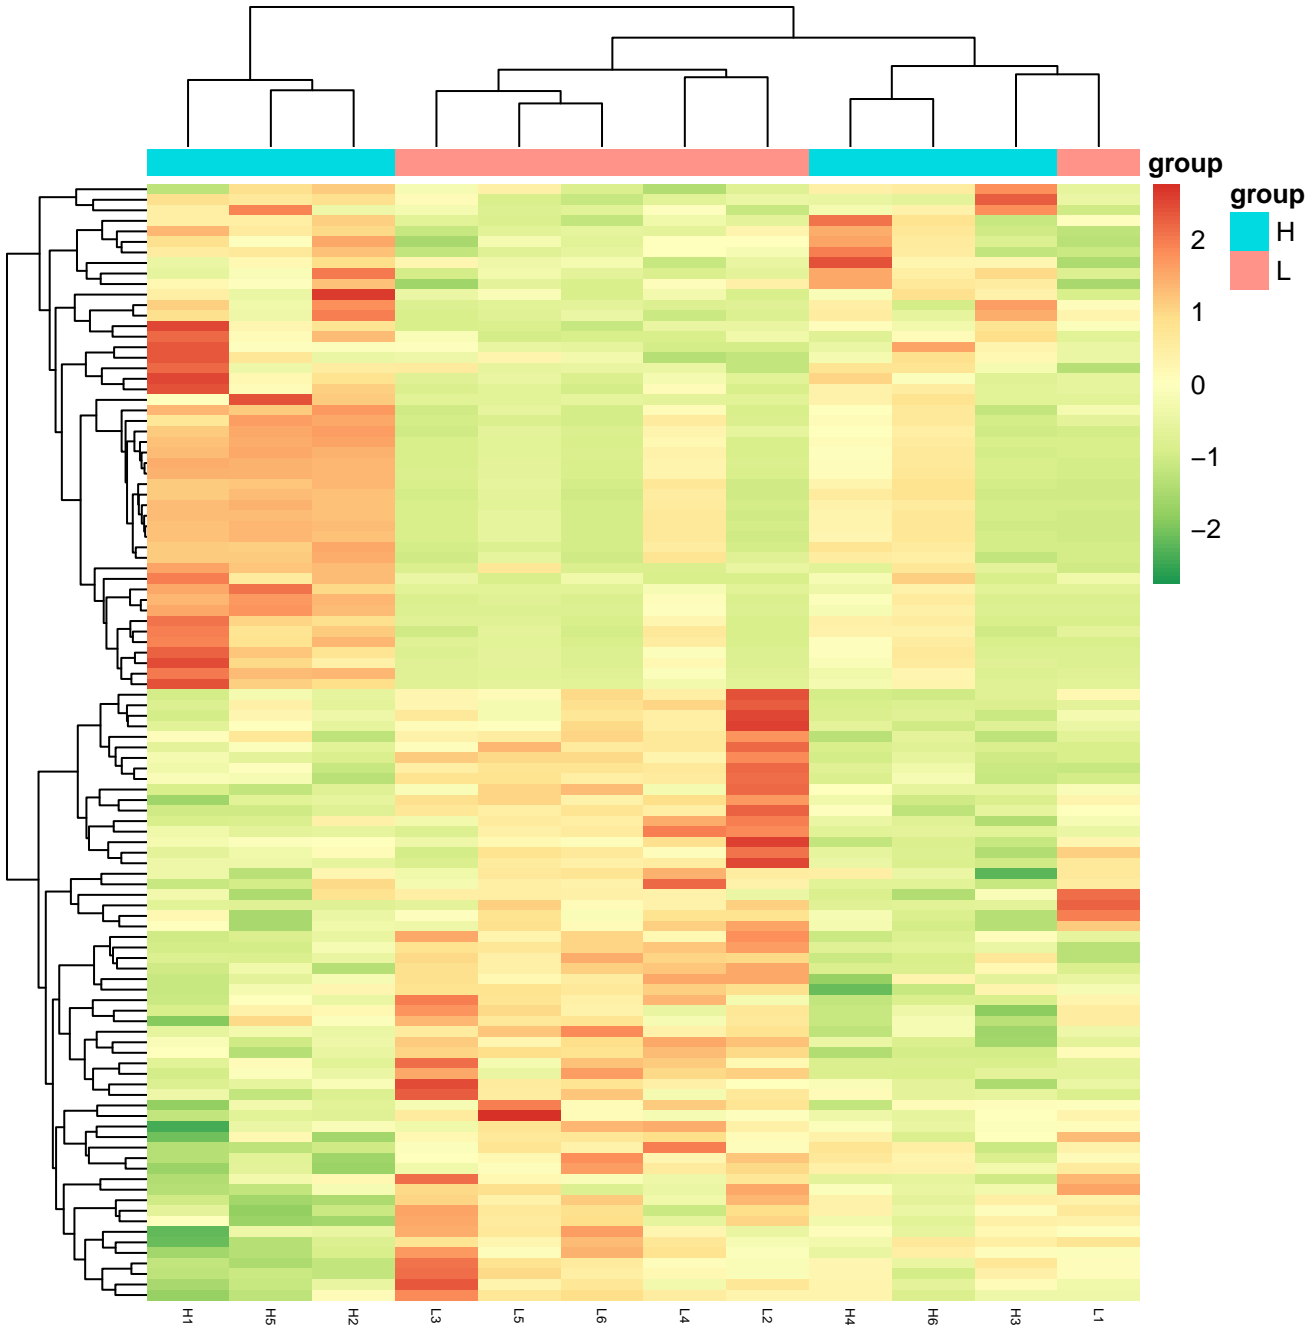

Supplement: biomarker_Web_Report_.zip [file H_vs_L_diff_heatmap.pdf › Web_Report/Diff_analysis/H_vs_L/H_vs_L_diff_heatmap.pdf]

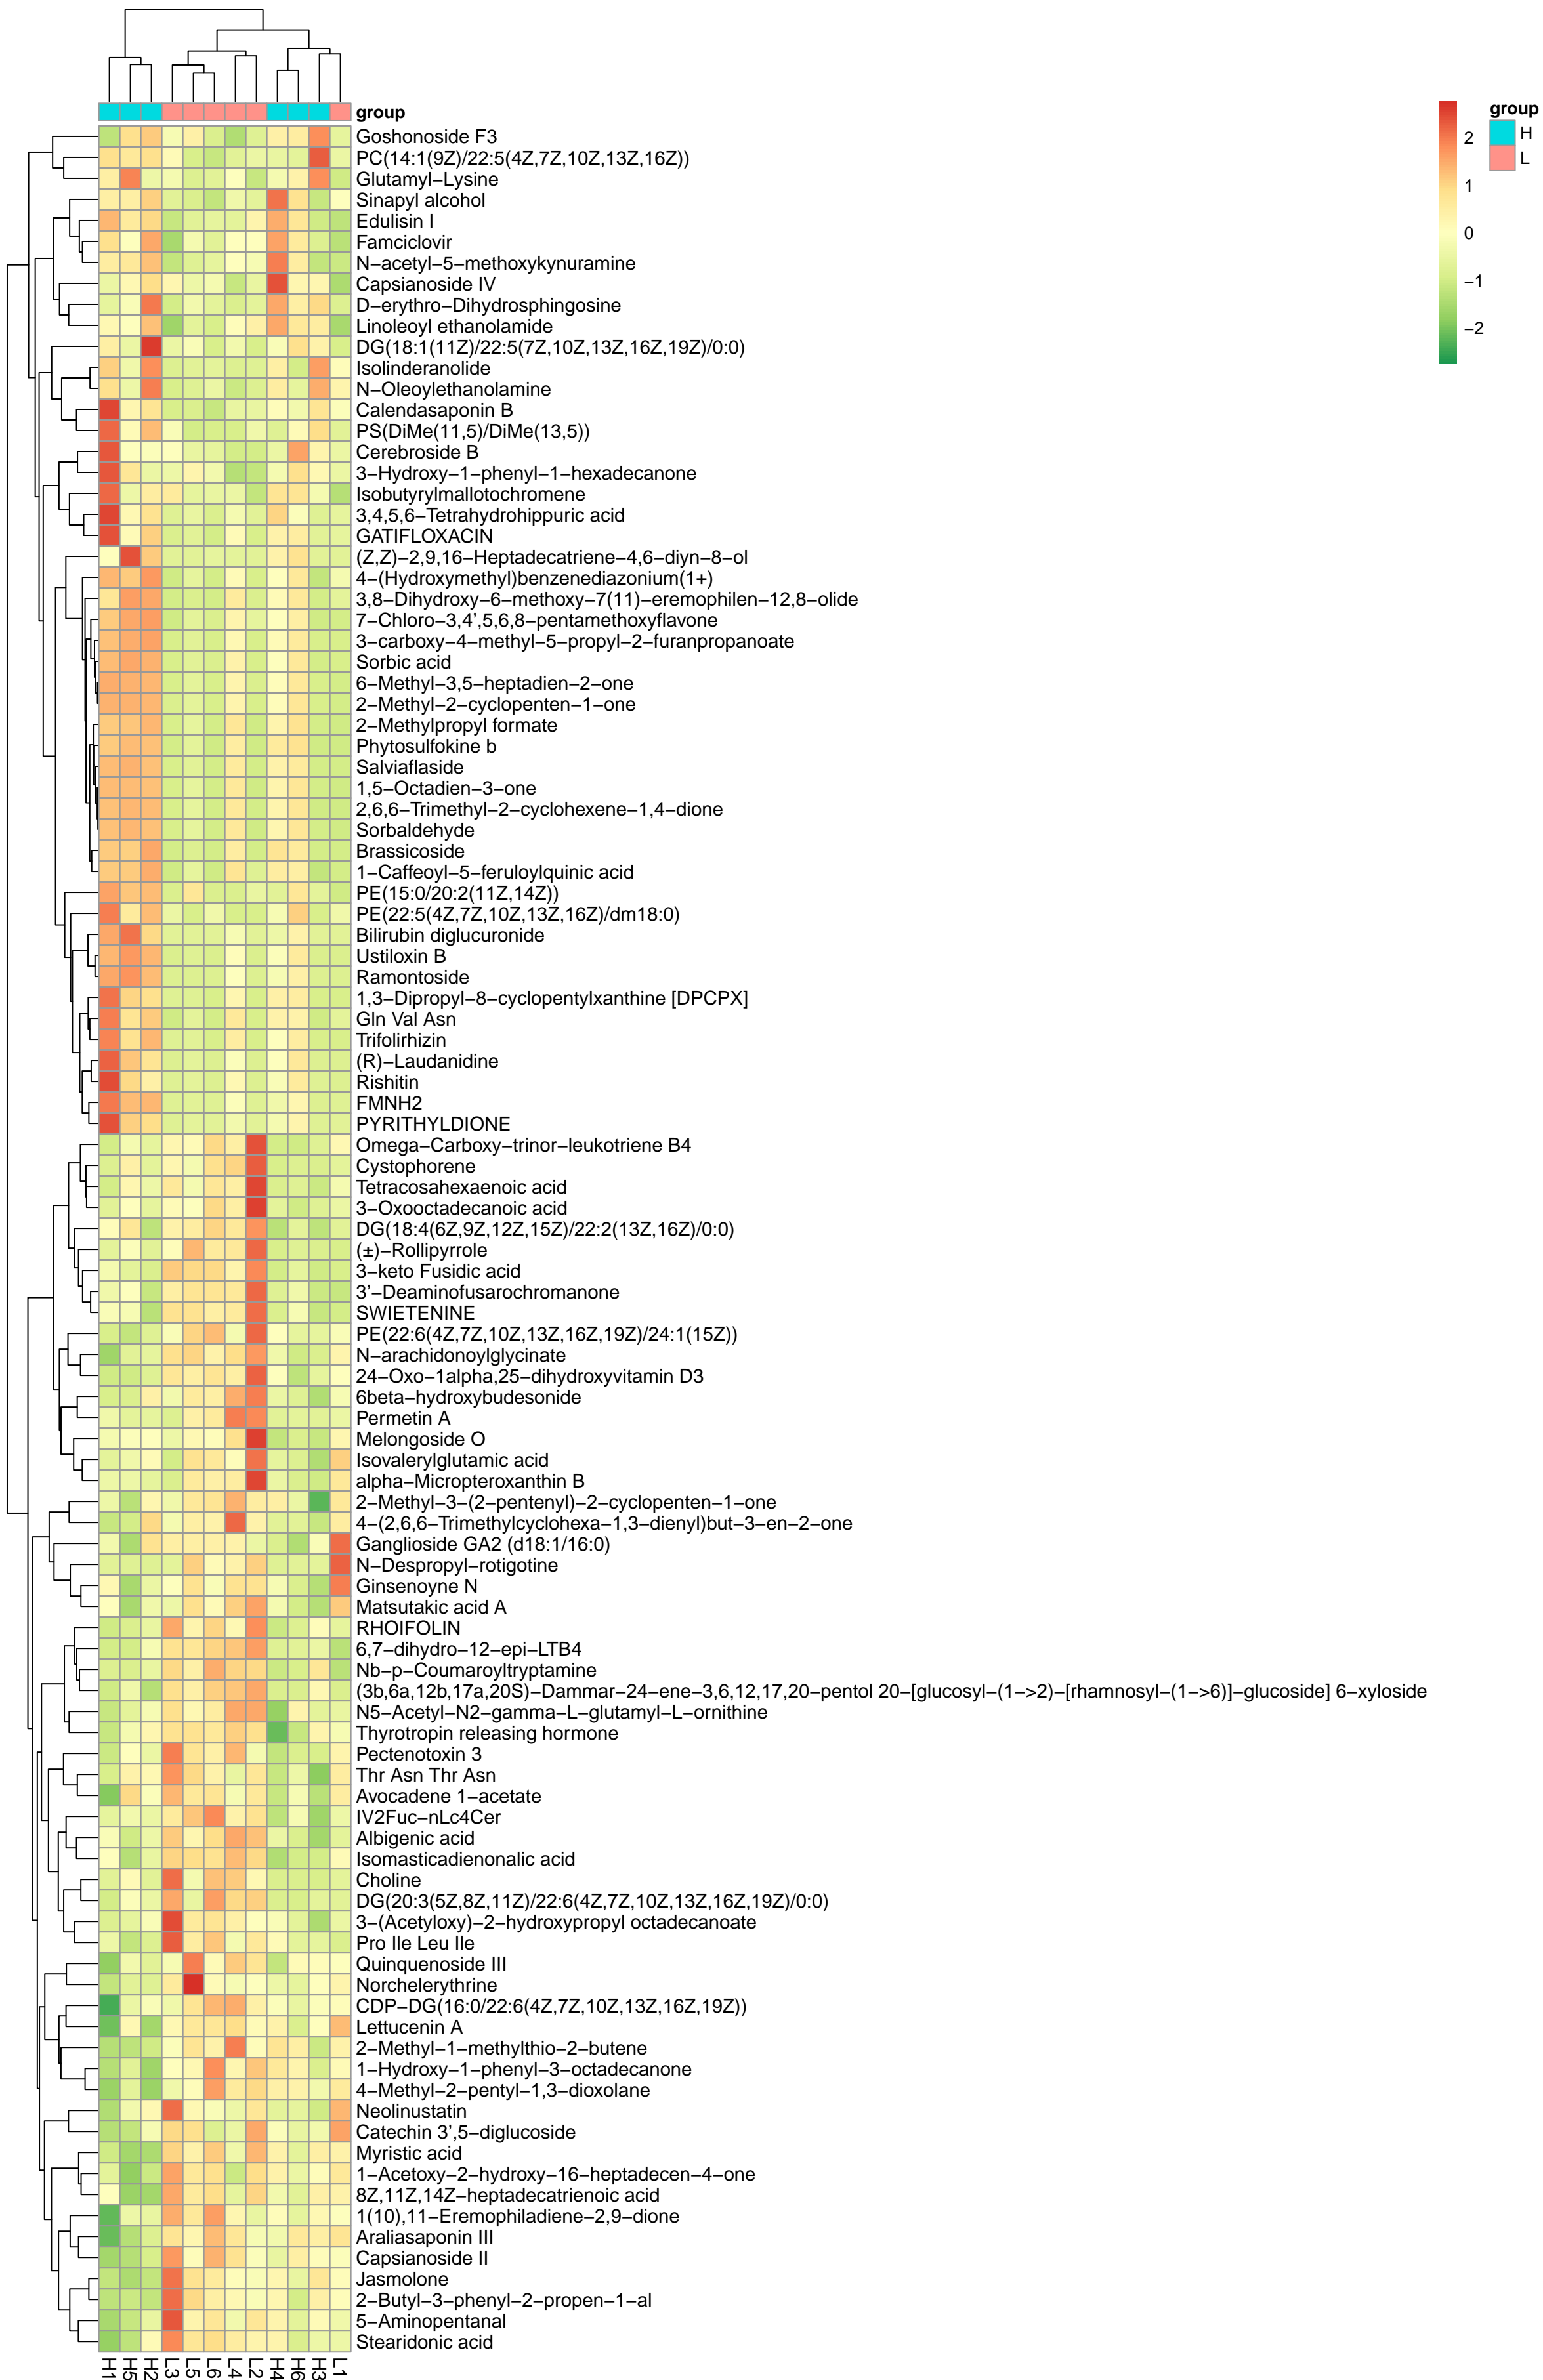

Supplement: biomarker_Web_Report_.zip [file H_vs_L_diff_heatmap_name.pdf › Web_Report/Diff_analysis/H_vs_L/H_vs_L_diff_heatmap_name.pdf]

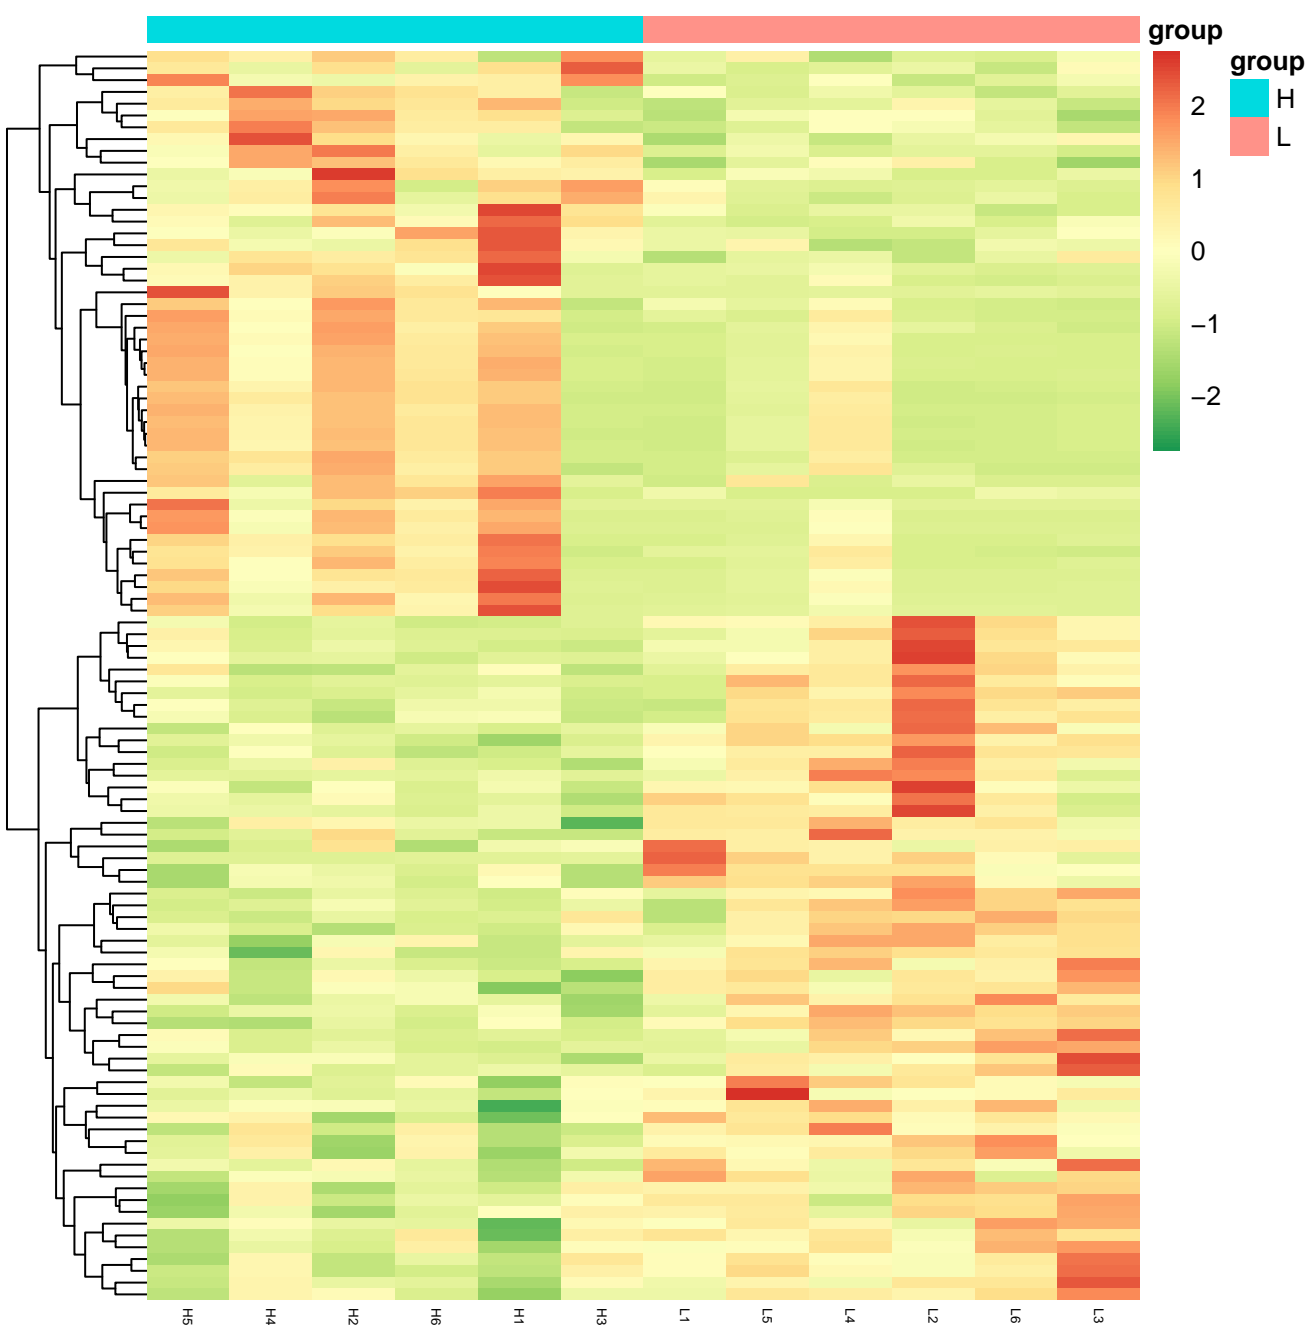

Supplement: biomarker_Web_Report_.zip [file H_vs_L_diff_heatmap_nonclustered_samples.pdf › Web_Report/Diff_analysis/H_vs_L/H_vs_L_diff_heatmap_nonclustered_samples.pdf]

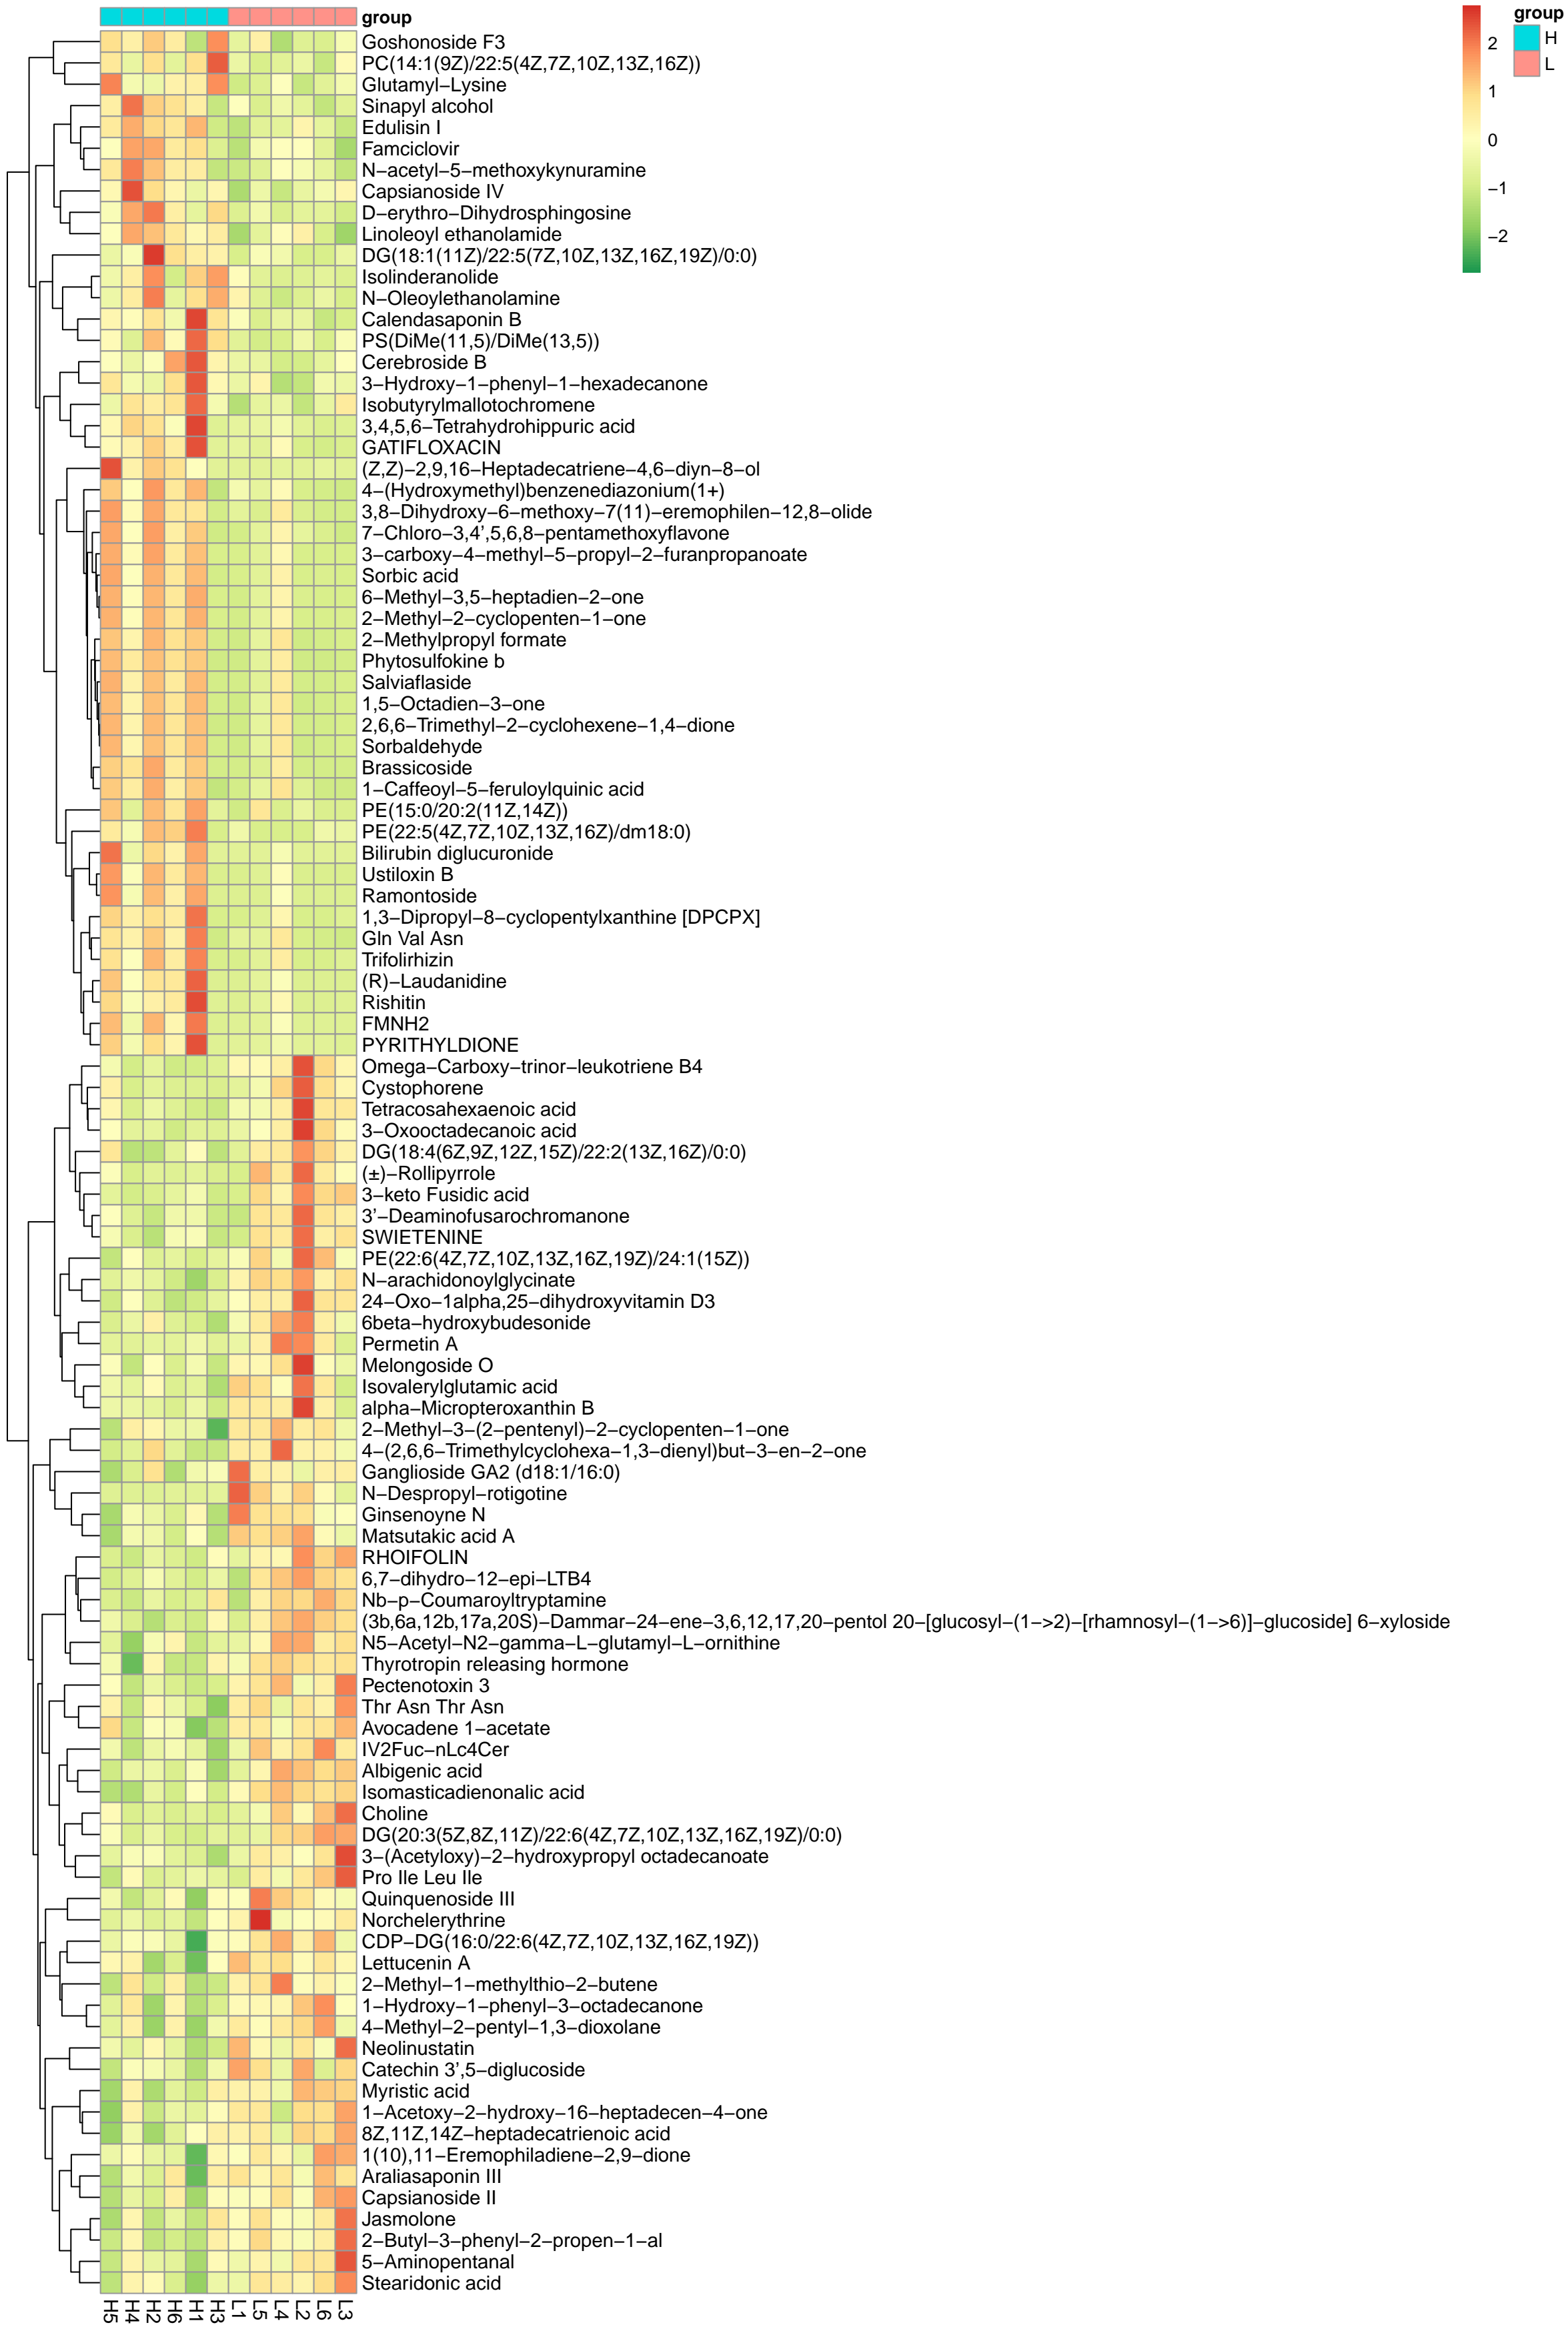

Supplement: biomarker_Web_Report_.zip [file H_vs_L_diff_heatmap_nonclustered_samples_name.pdf › Web_Report/Diff_analysis/H_vs_L/H_vs_L_diff_heatmap_nonclustered_samples_name.pdf]

classification

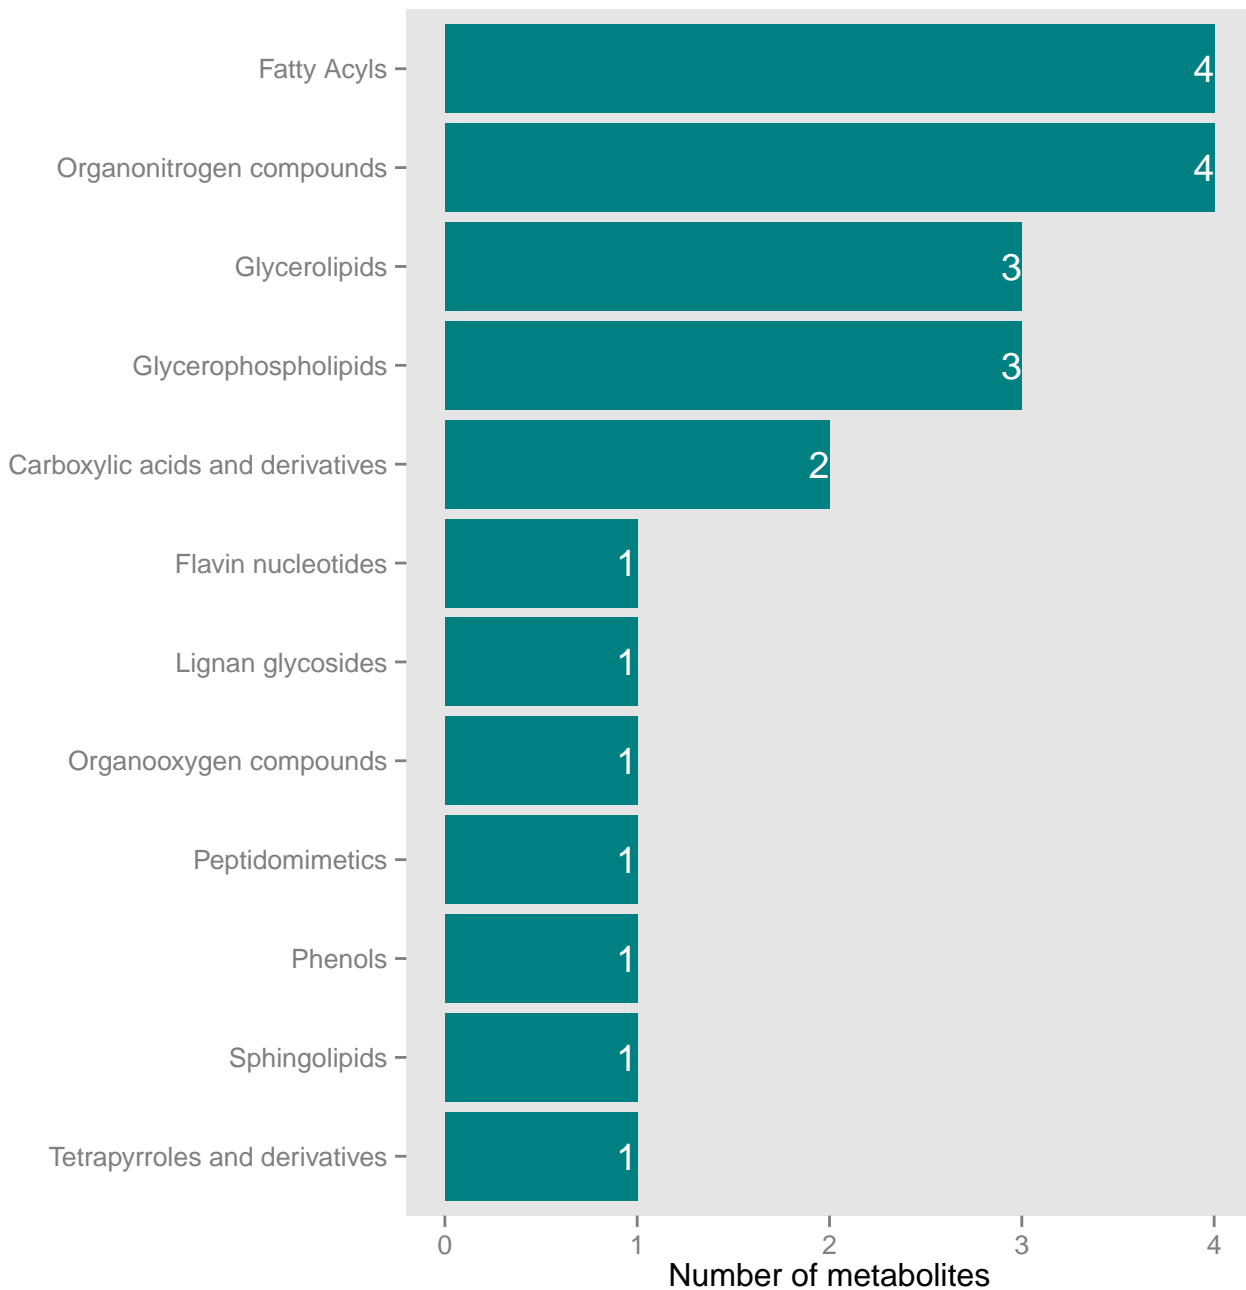

Supplement: biomarker_Web_Report_.zip [file H_vs_L_metabolites_classification_top20.pdf › Web_Report/Diff_analysis/H_vs_L/H_vs_L_metabolites_classification_top20.pdf]

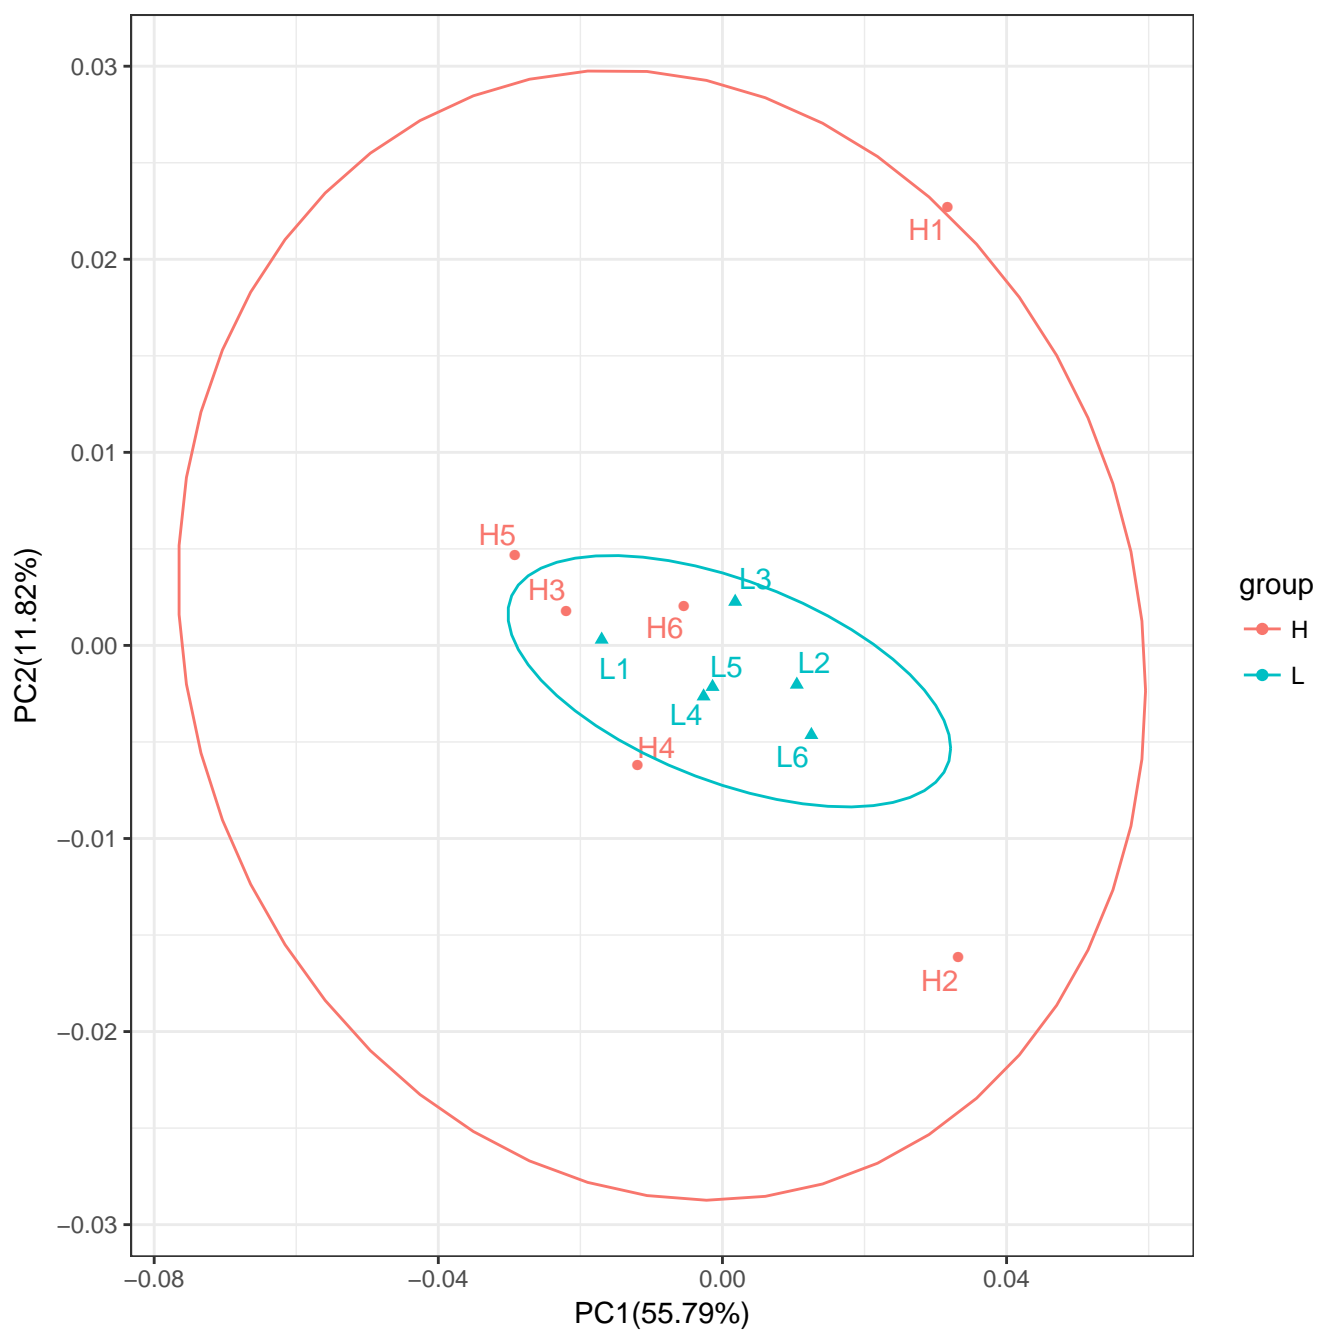

Supplement: biomarker_Web_Report_.zip [file H_vs_L_pca.pdf › Web_Report/Diff_analysis/H_vs_L/H_vs_L_pca.pdf]

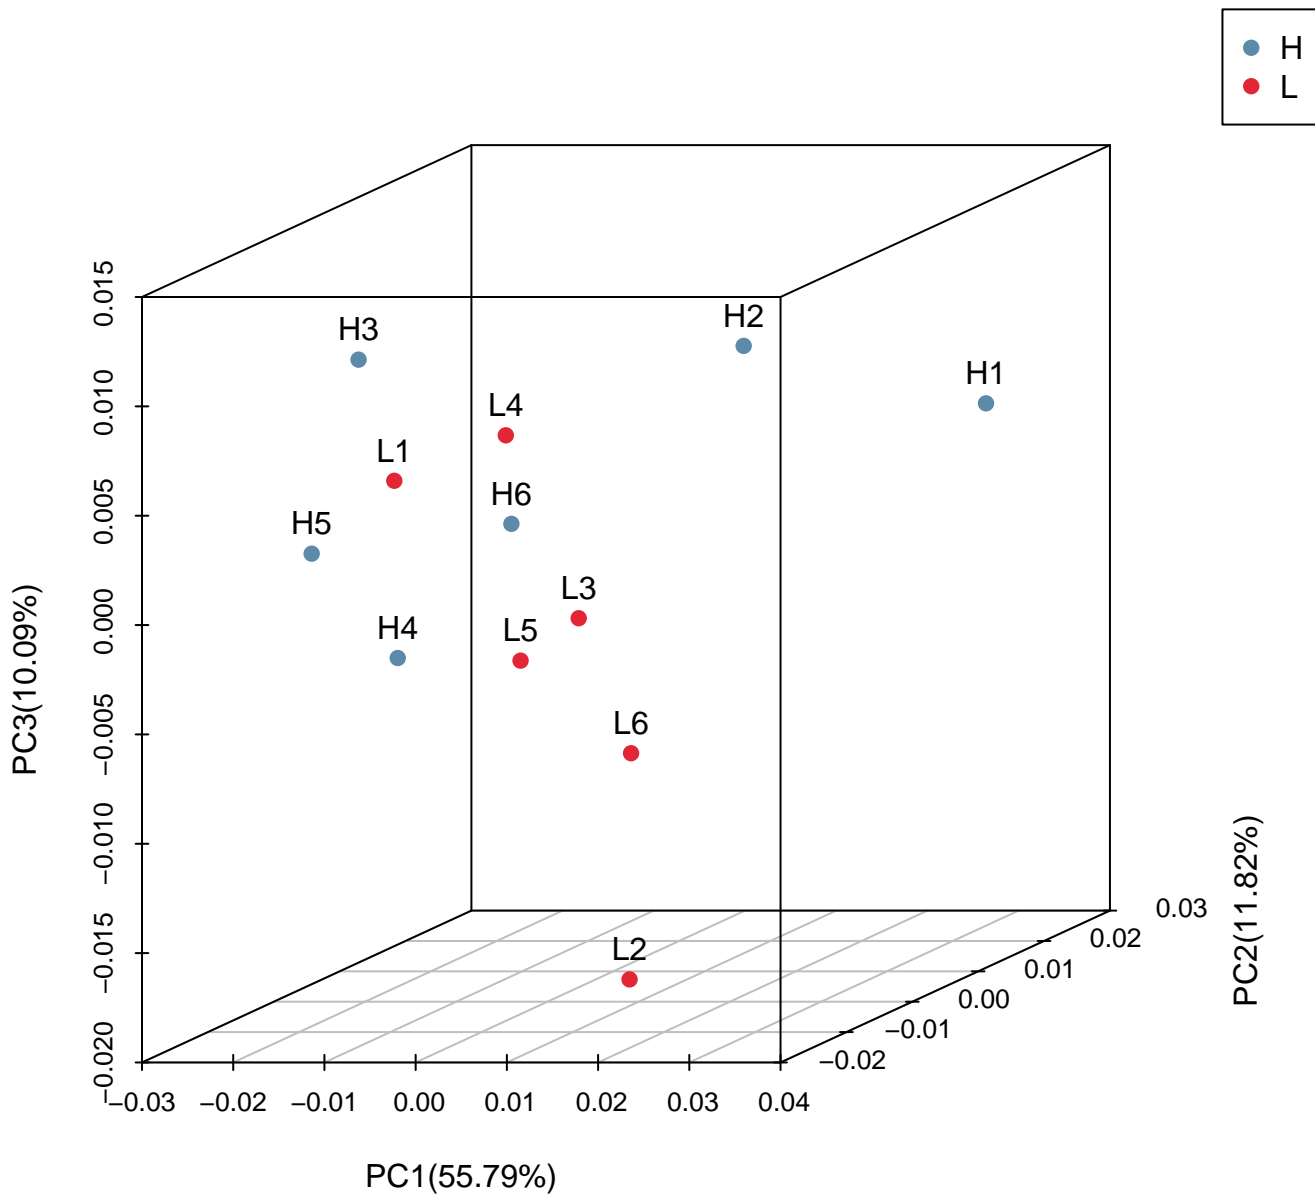

Supplement: biomarker_Web_Report_.zip [file H_vs_L_pca3D.pdf › Web_Report/Diff_analysis/H_vs_L/H_vs_L_pca3D.pdf]

## KEGG\_pathway

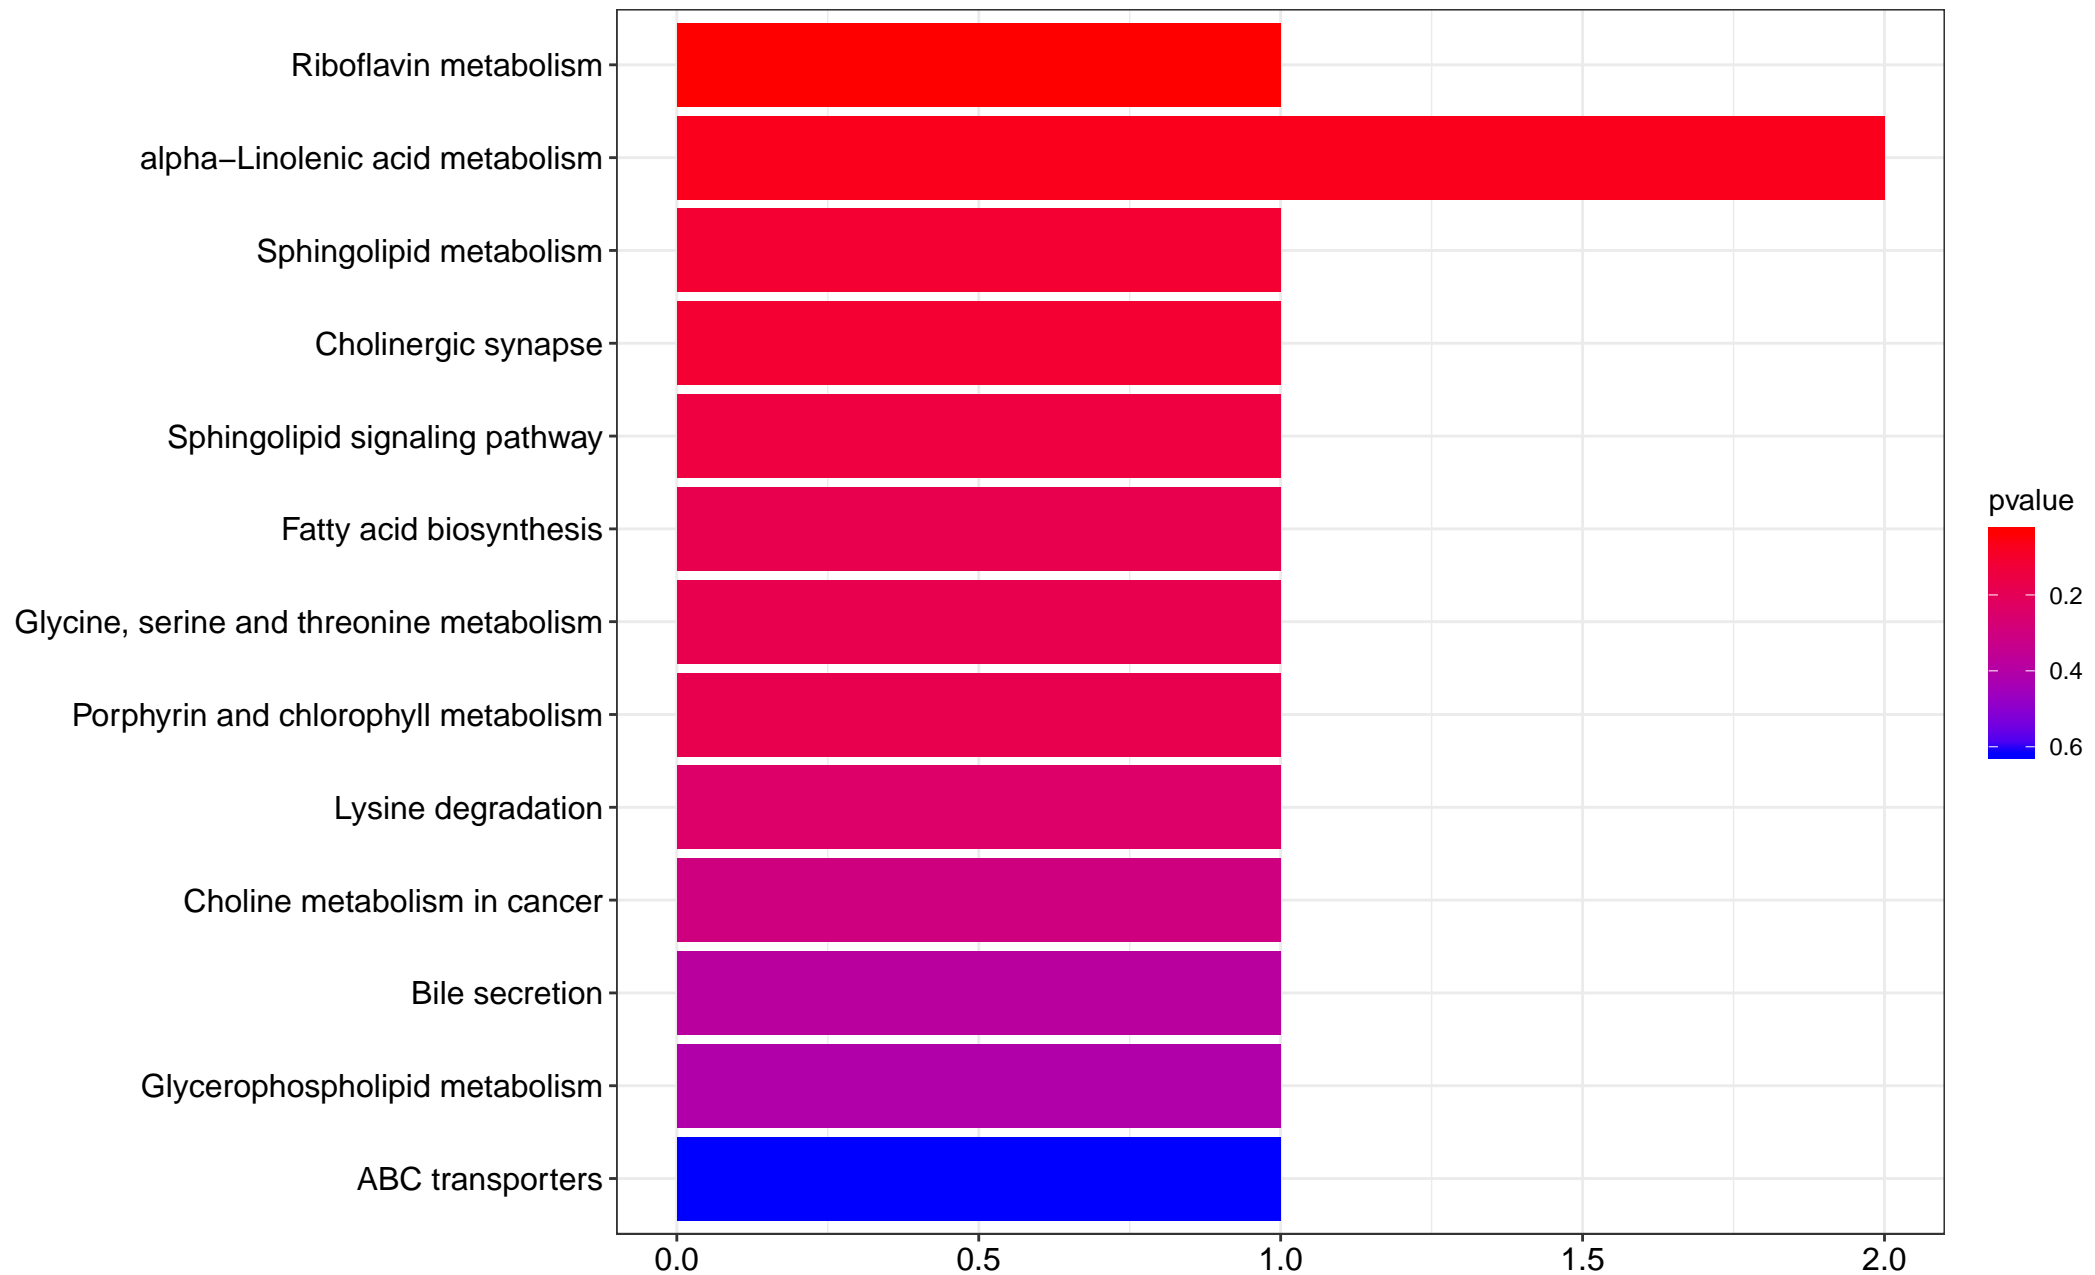

Supplement: biomarker_Web_Report_.zip [file H_vs_L_KEGG_pathway_enrich_barplot.pdf › Web_Report/Diff_analysis/H_vs_L/KEGG/Graph/H_vs_L_KEGG_pathway_enrich_barplot.pdf]

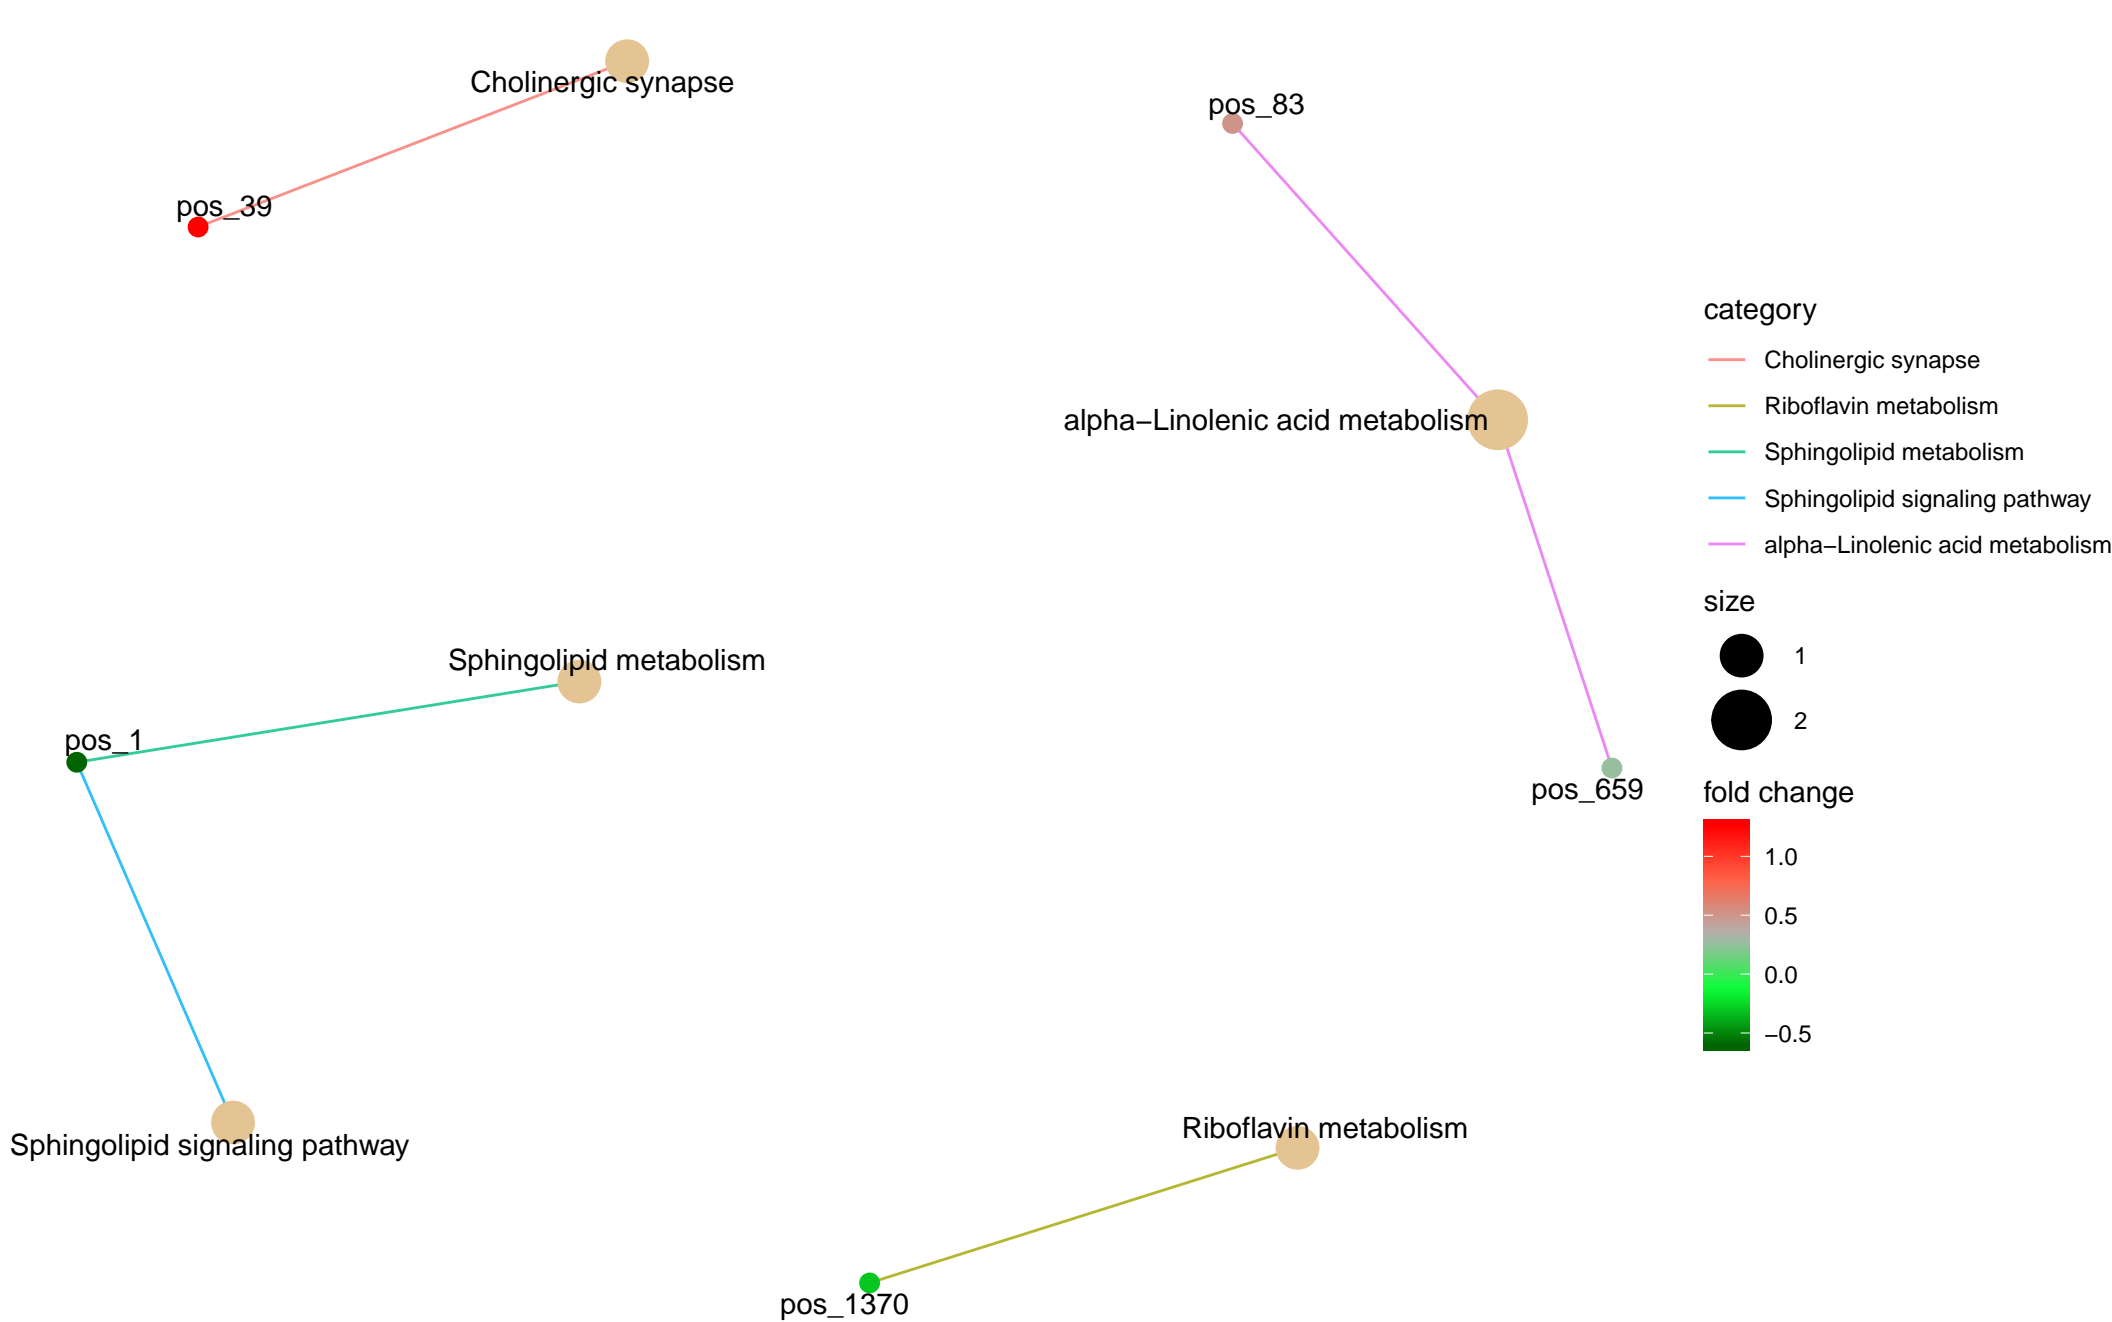

Supplement: biomarker_Web_Report_.zip [file H_vs_L_KEGG_pathway_enrich_cnetplot.pdf › Web_Report/Diff_analysis/H_vs_L/KEGG/Graph/H_vs_L_KEGG_pathway_enrich_cnetplot.pdf]

## KEGG\_pathway

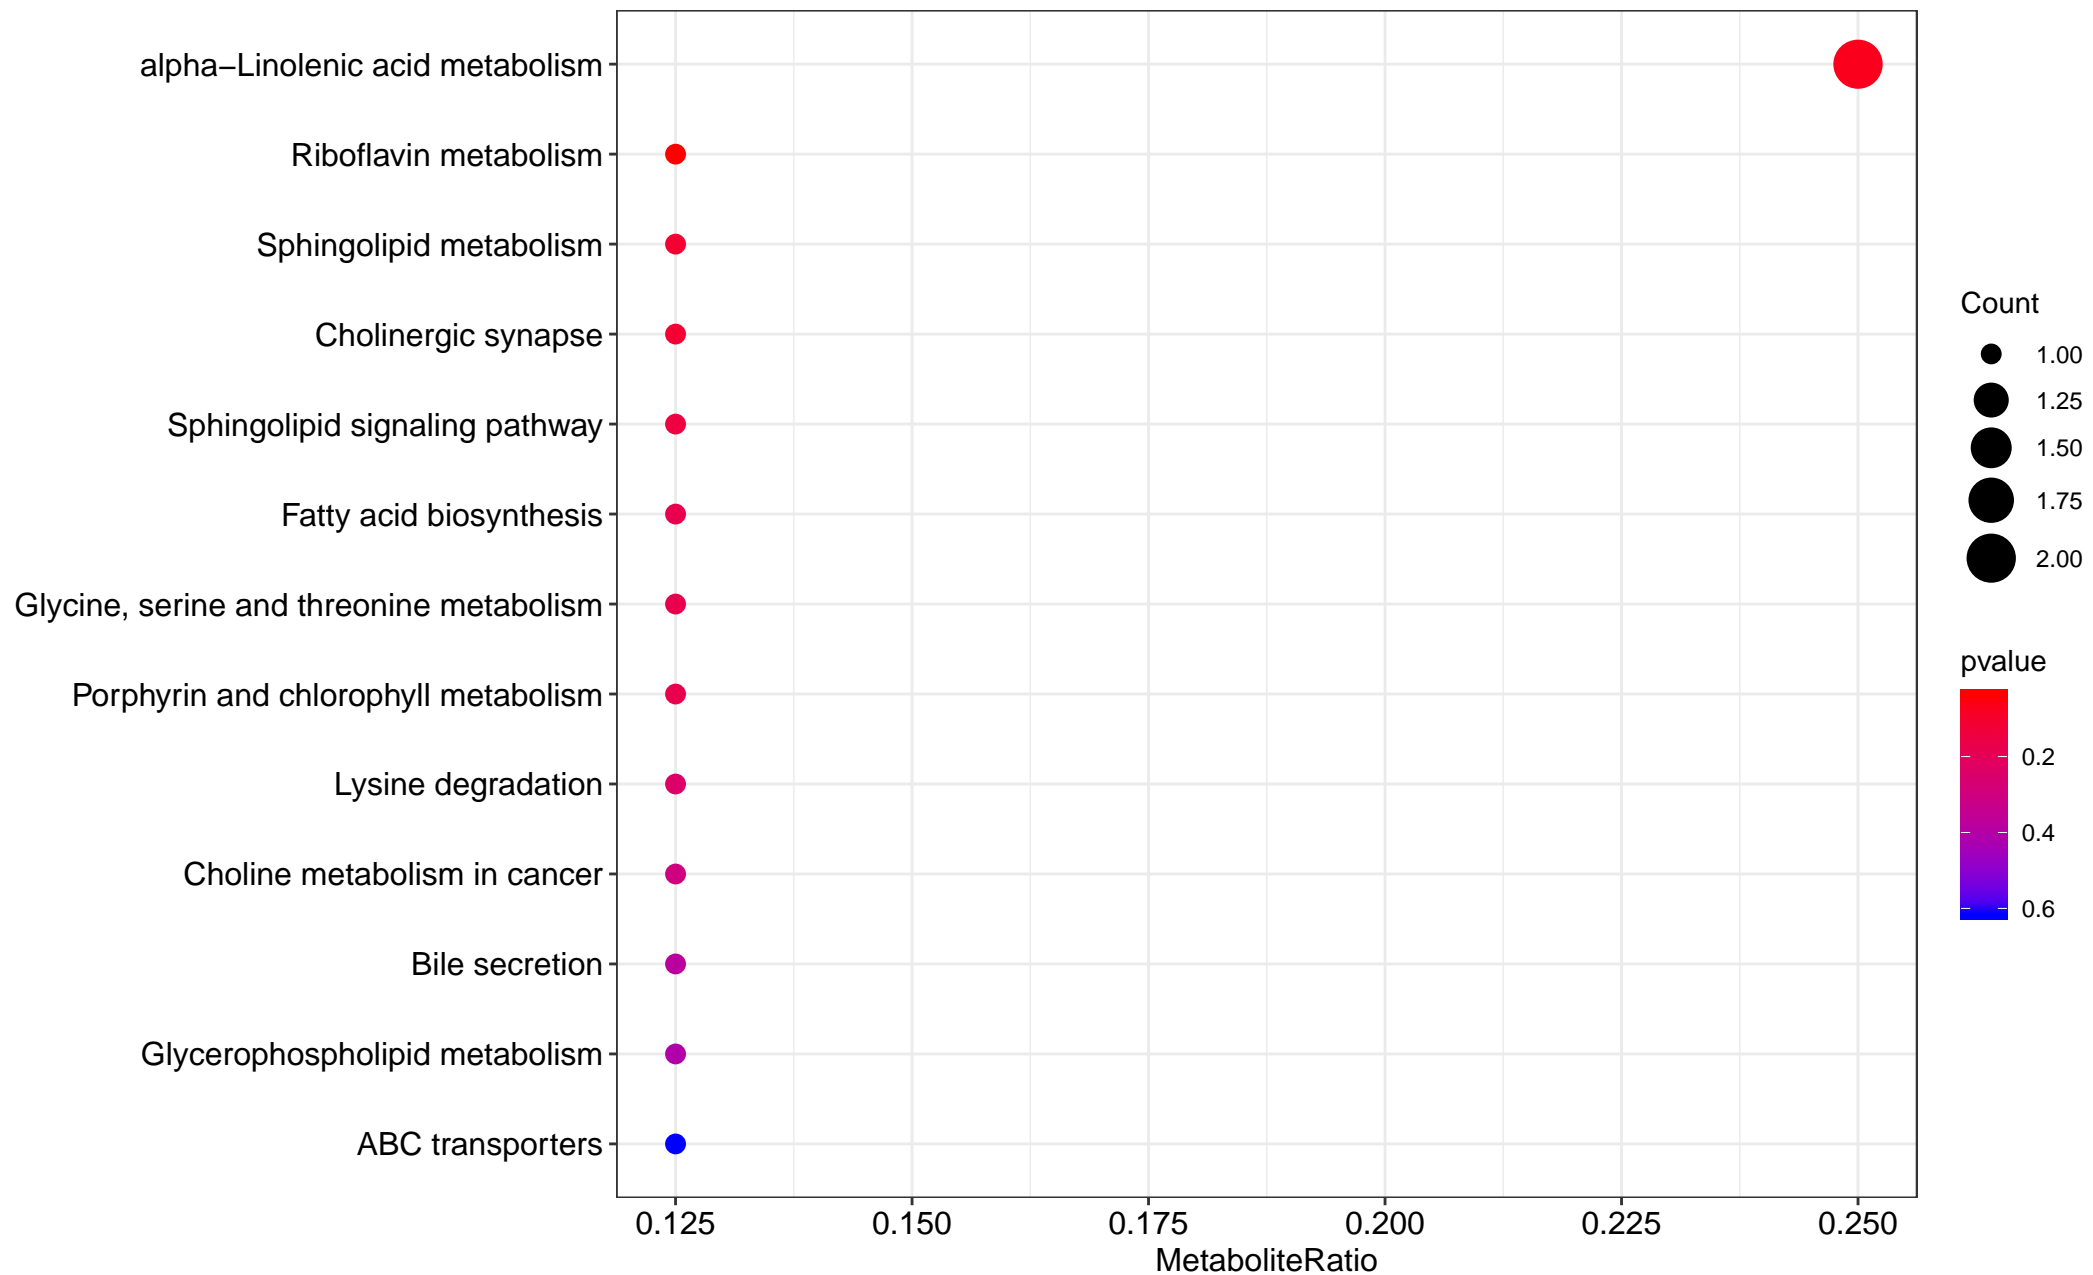

Supplement: biomarker_Web_Report_.zip [file H_vs_L_KEGG_pathway_enrich_dotplot.pdf › Web_Report/Diff_analysis/H_vs_L/KEGG/Graph/H_vs_L_KEGG_pathway_enrich_dotplot.pdf]

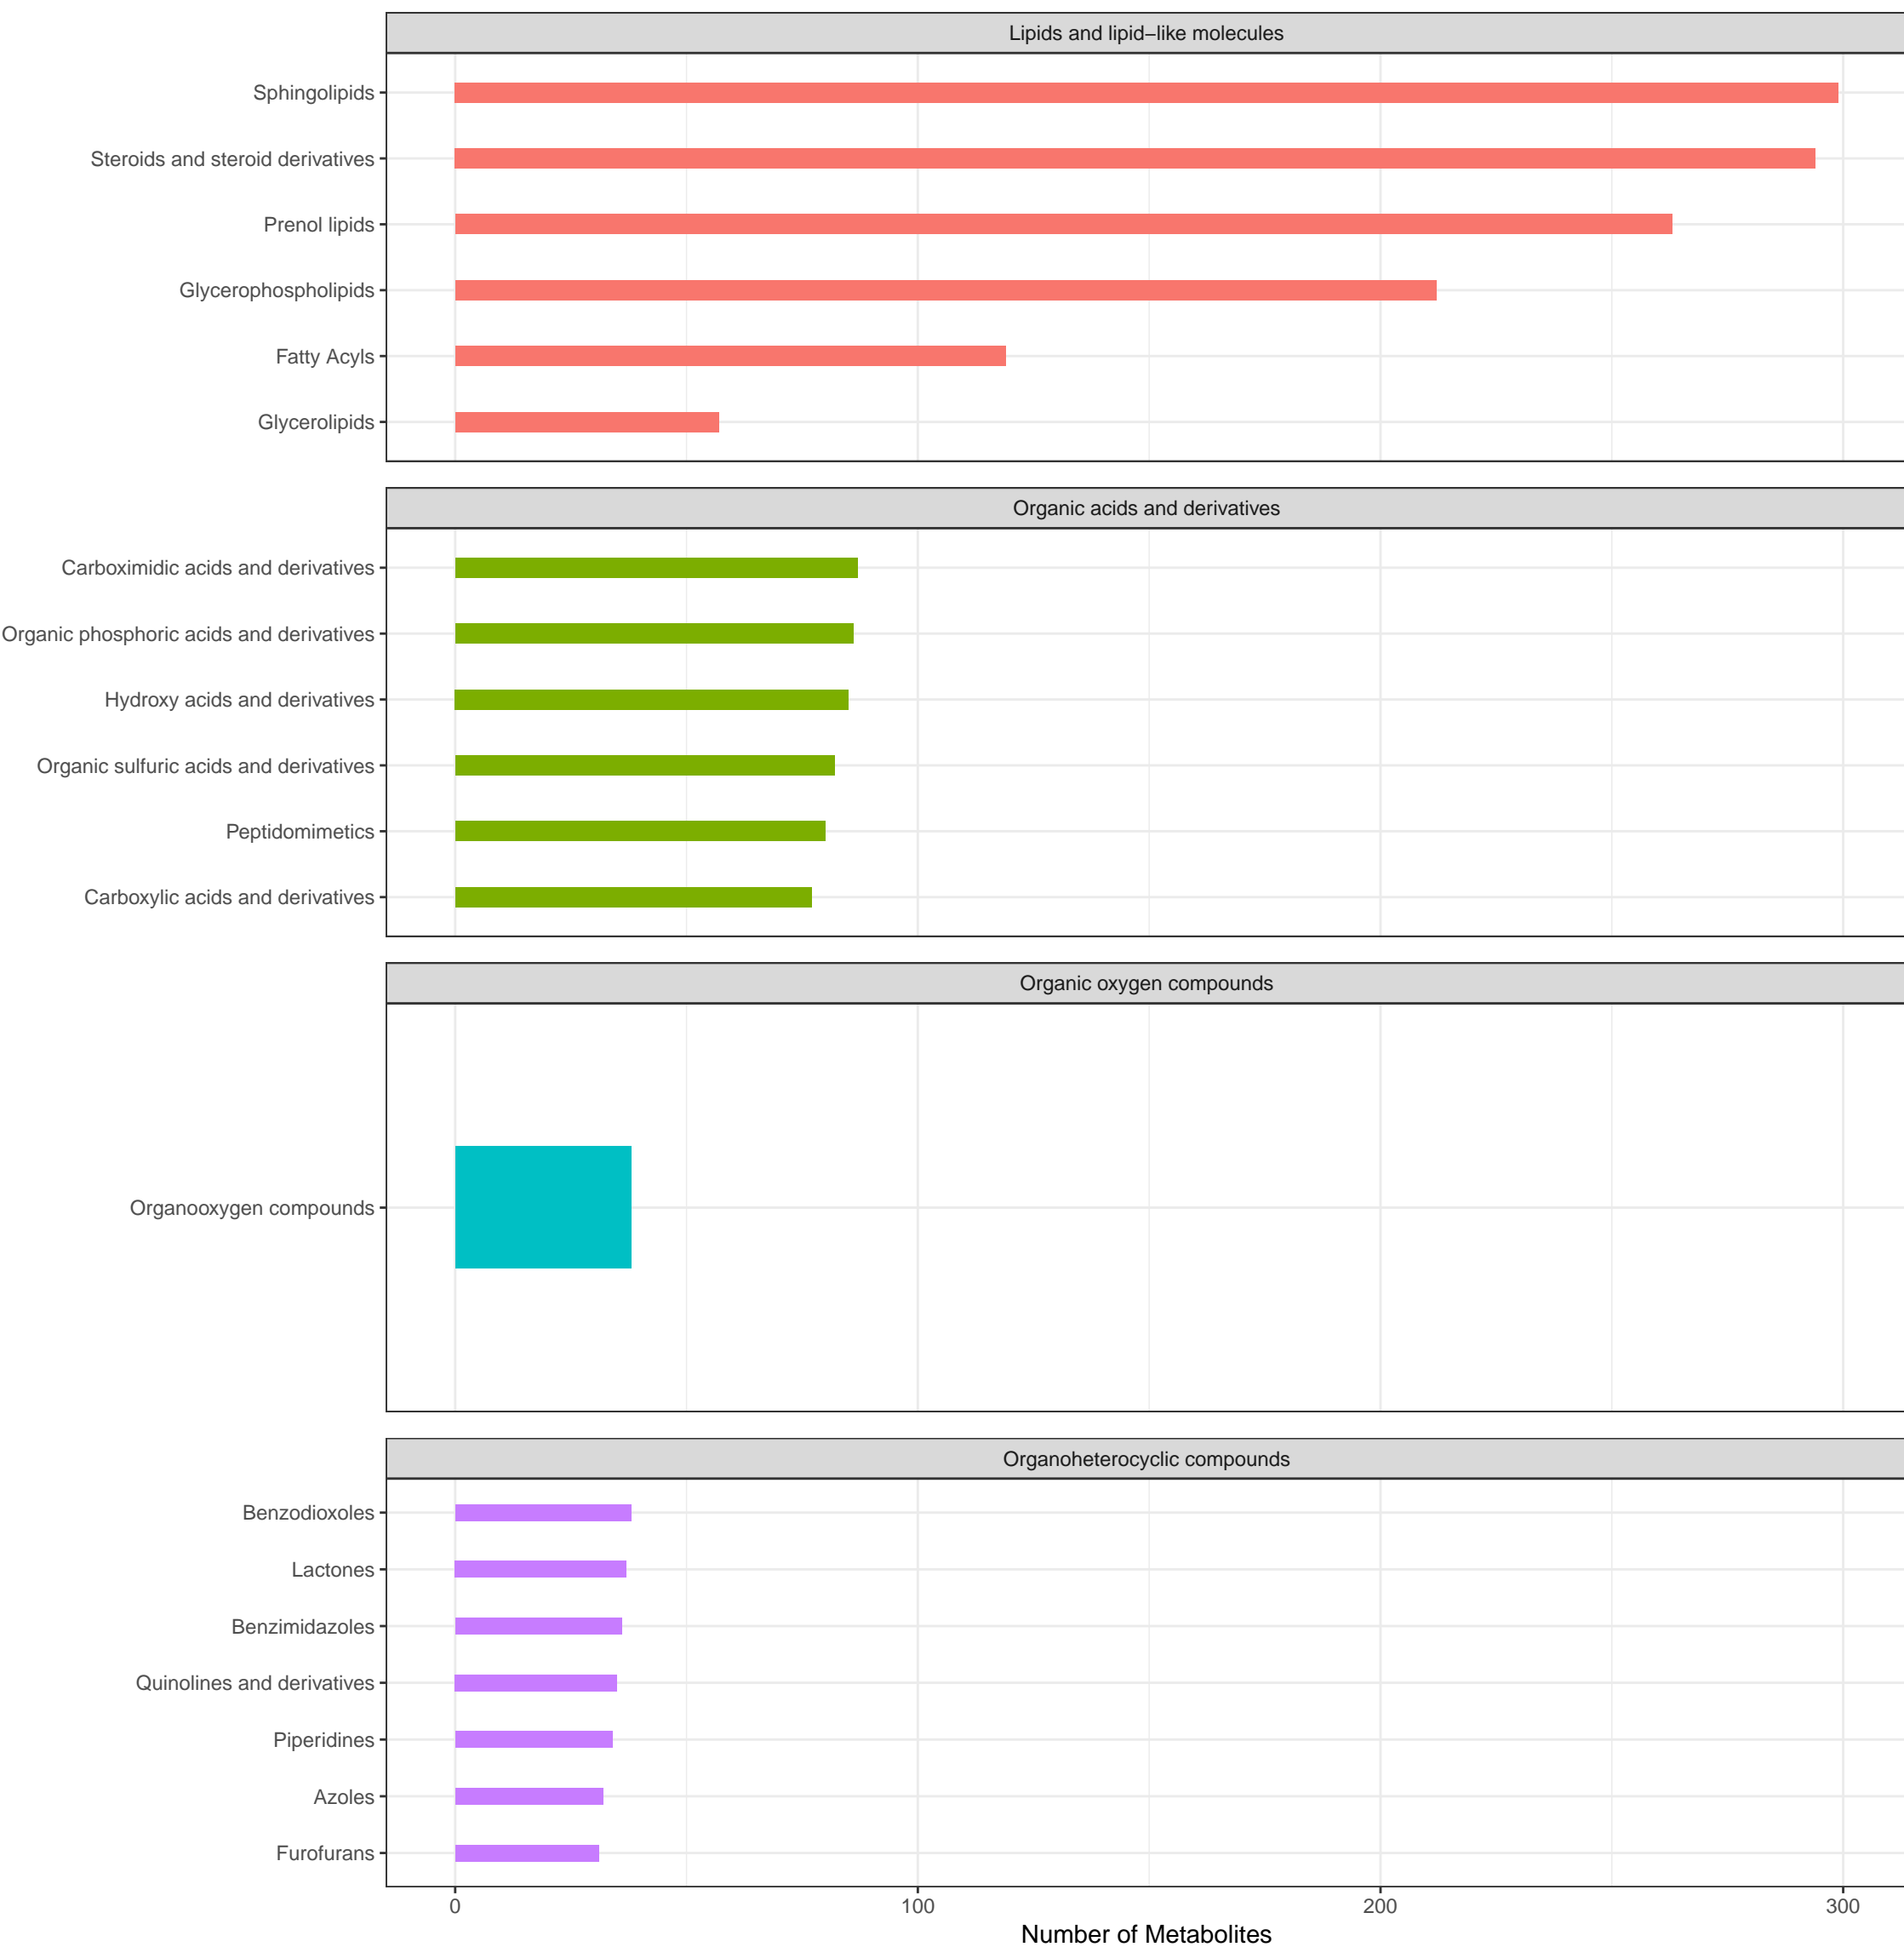

Supplement: biomarker_Web_Report_.zip [file meta_hmdb_anno.pdf › Web_Report/Metabolites_annotation/HMDB/meta_hmdb_anno.pdf]

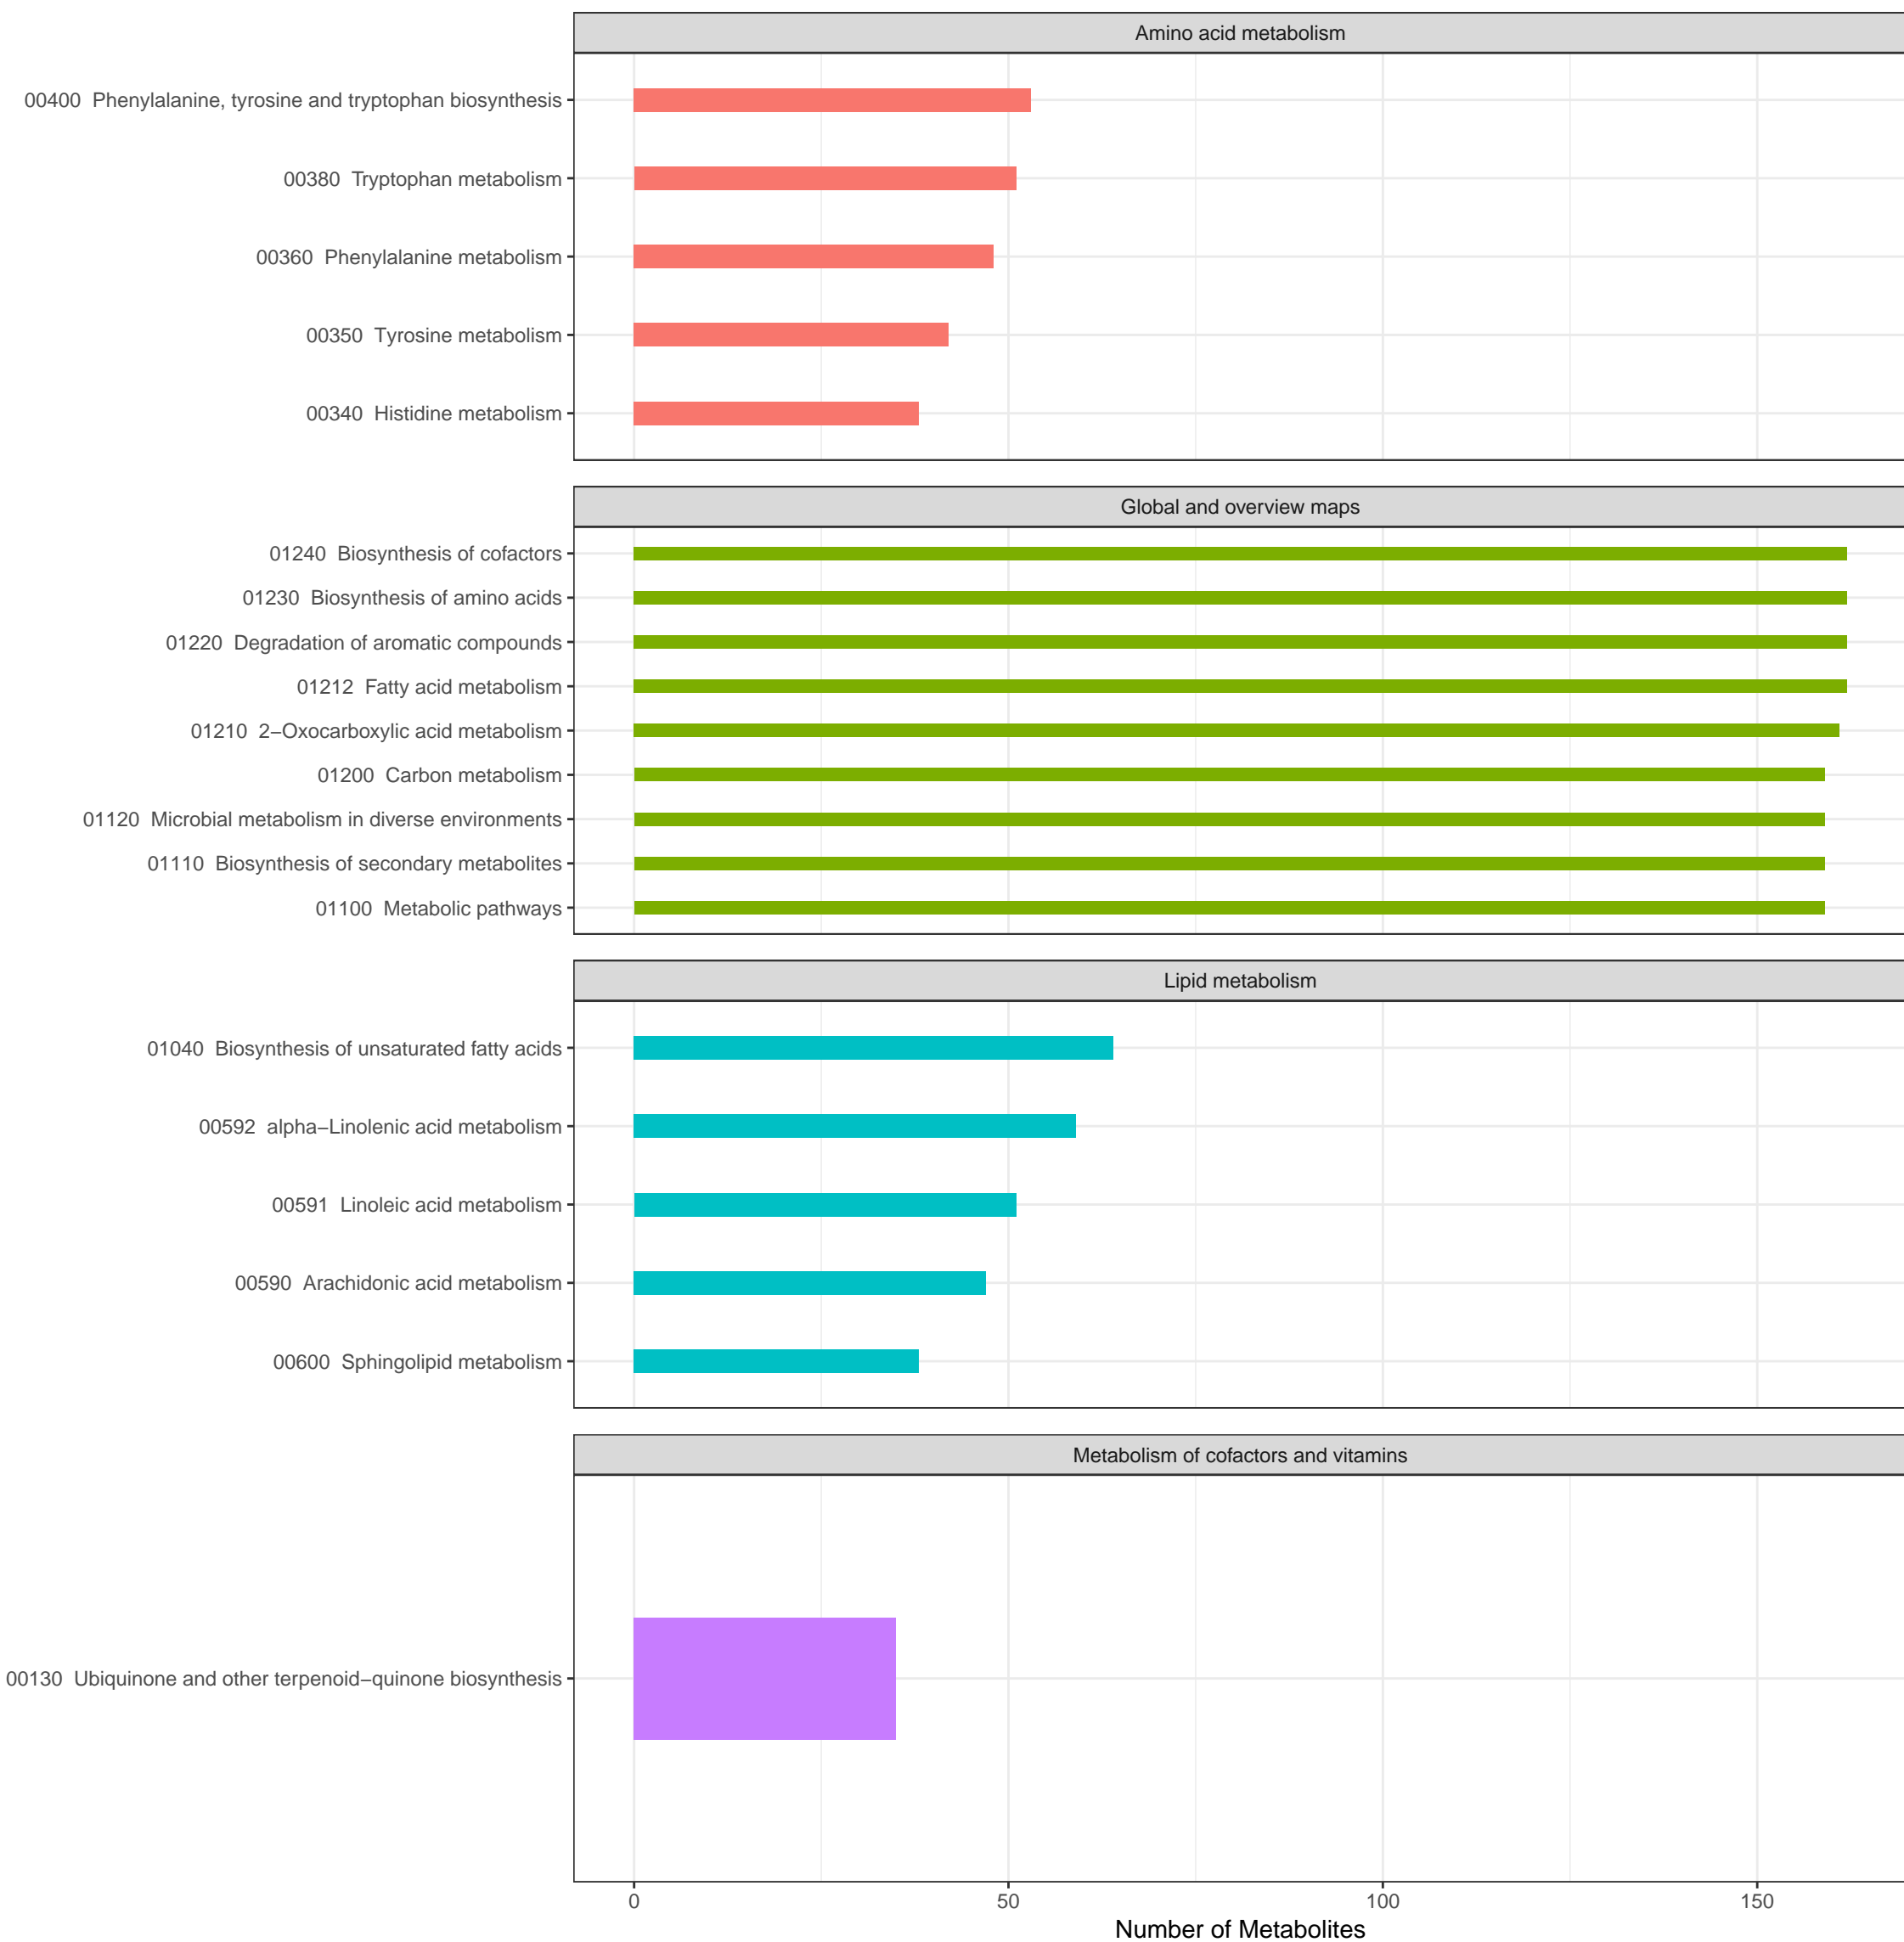

Supplement: biomarker_Web_Report_.zip [file meta_kegg_anno.pdf › Web_Report/Metabolites_annotation/KEGG/meta_kegg_anno.pdf]

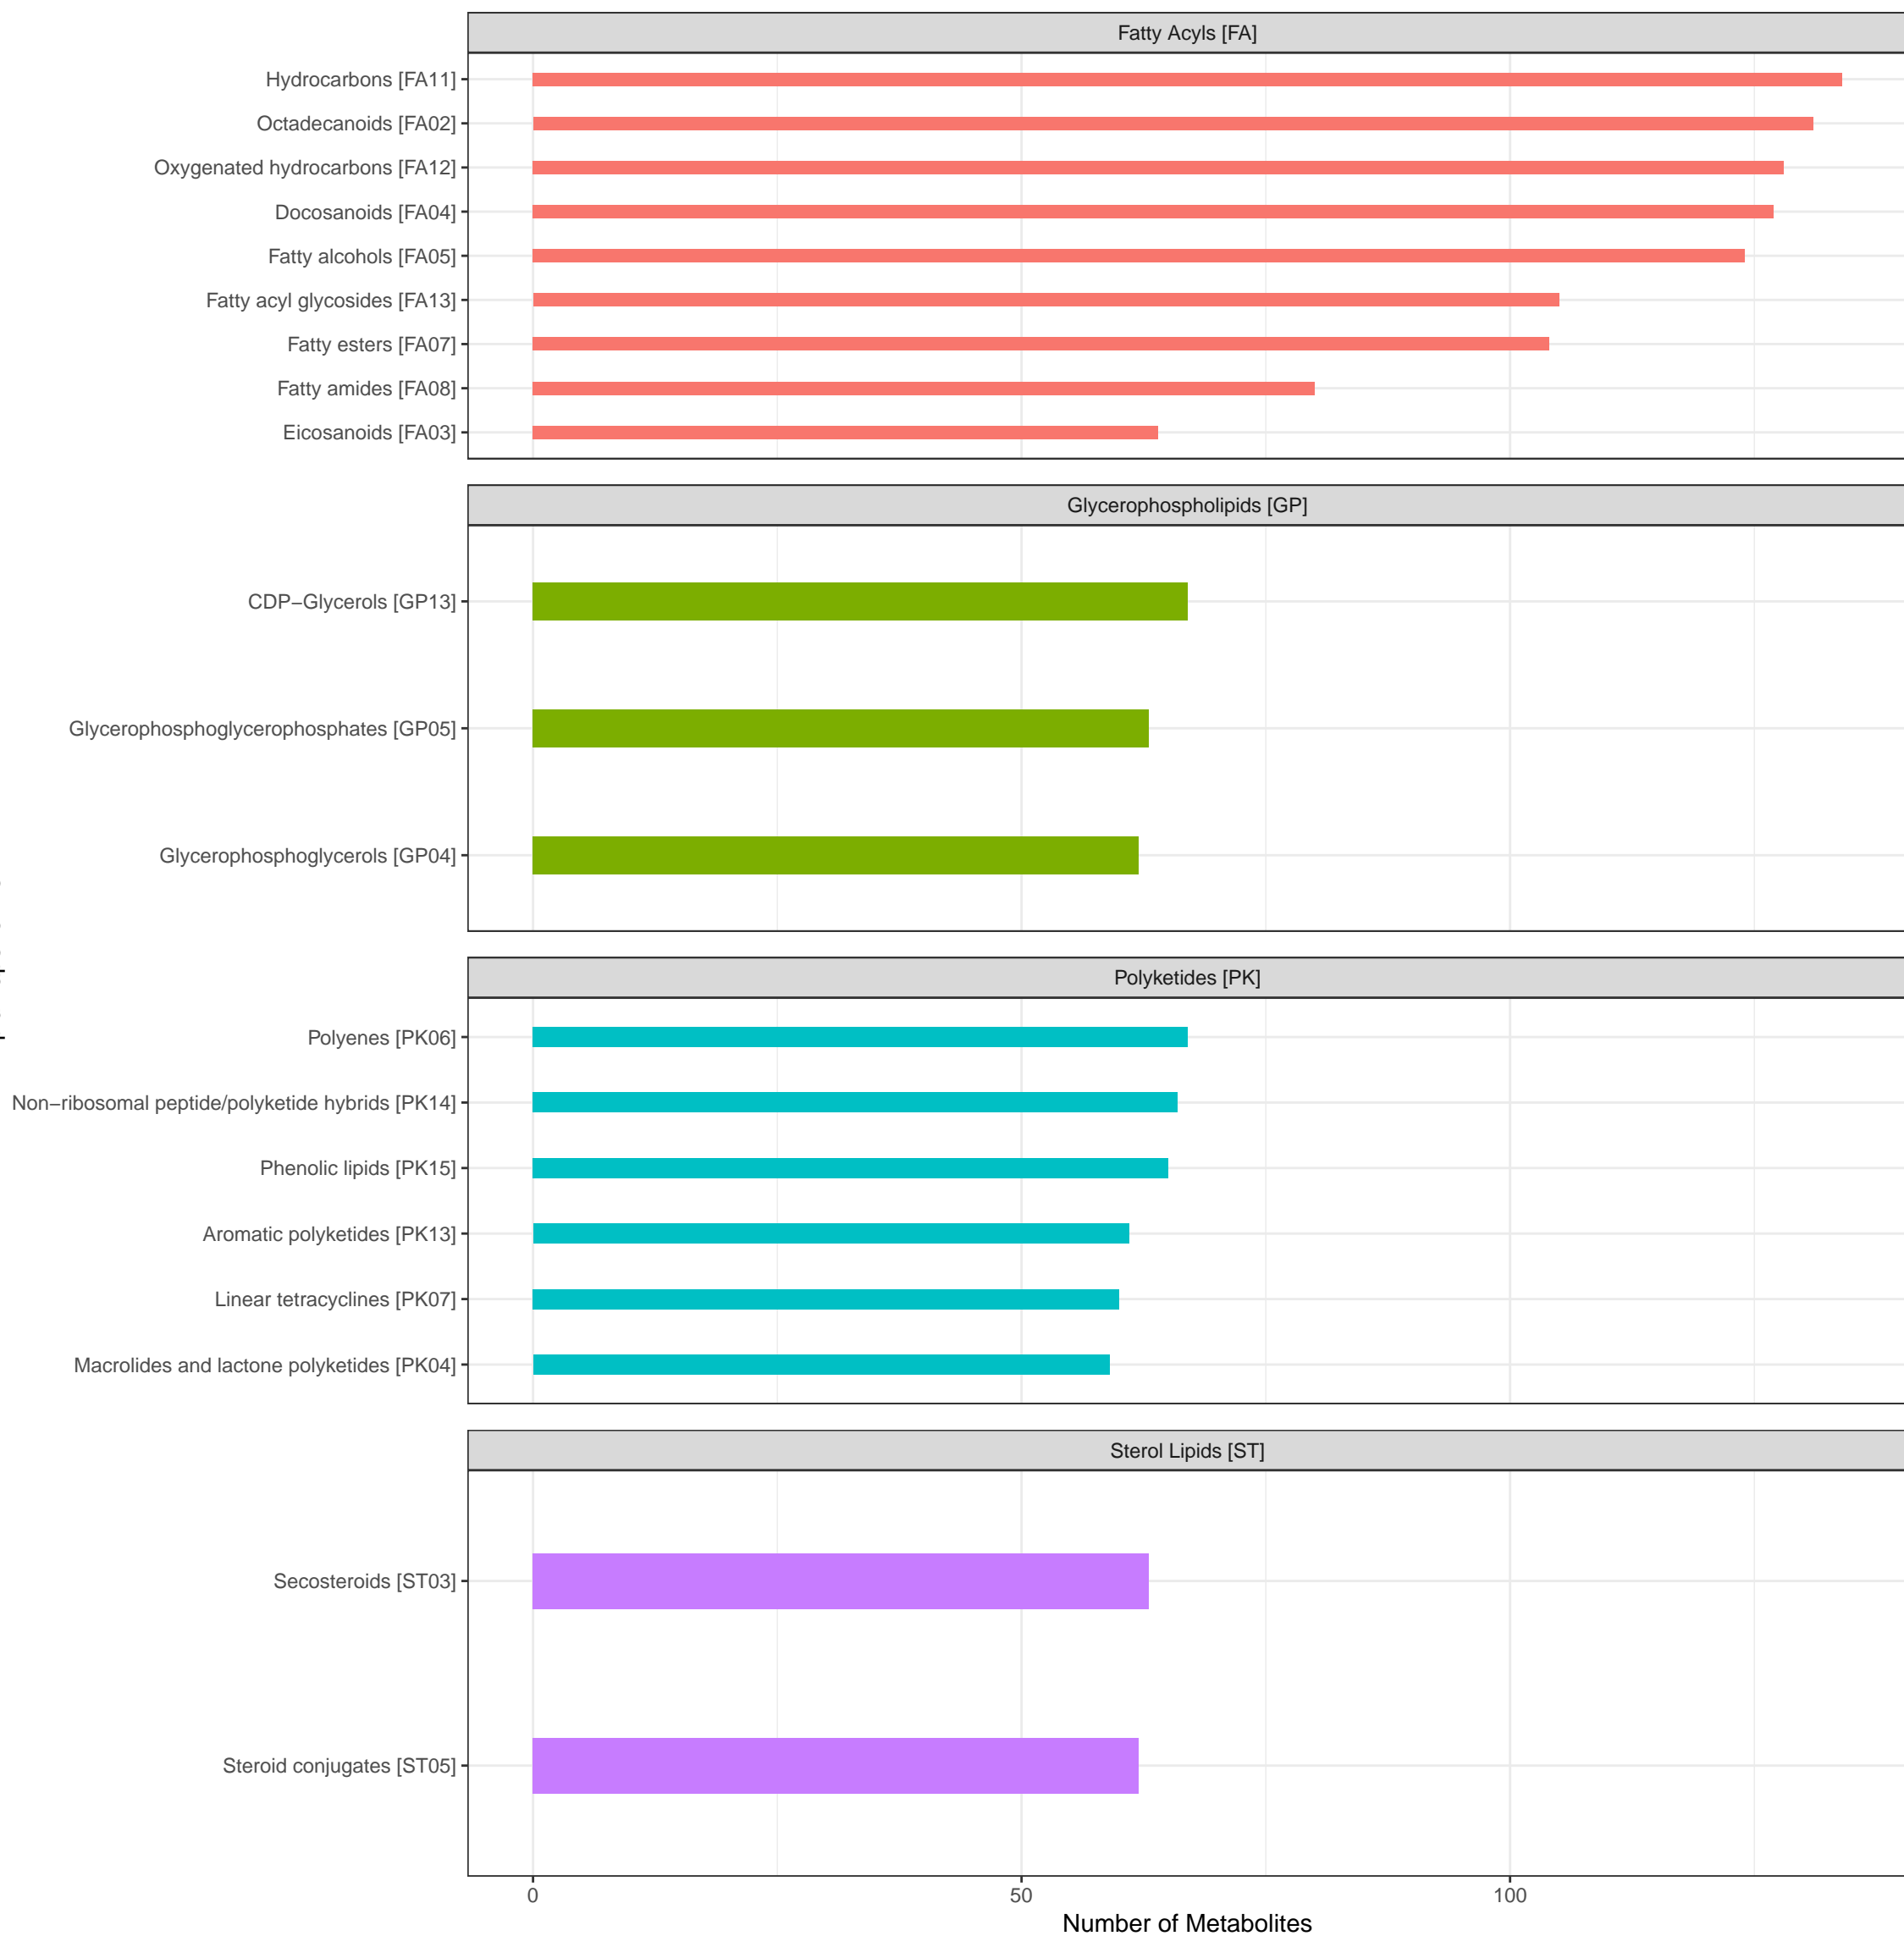

Supplement: biomarker_Web_Report_.zip [file meta_lipidmaps_anno.pdf › Web_Report/Metabolites_annotation/Lipidmaps/meta_lipidmaps_anno.pdf]

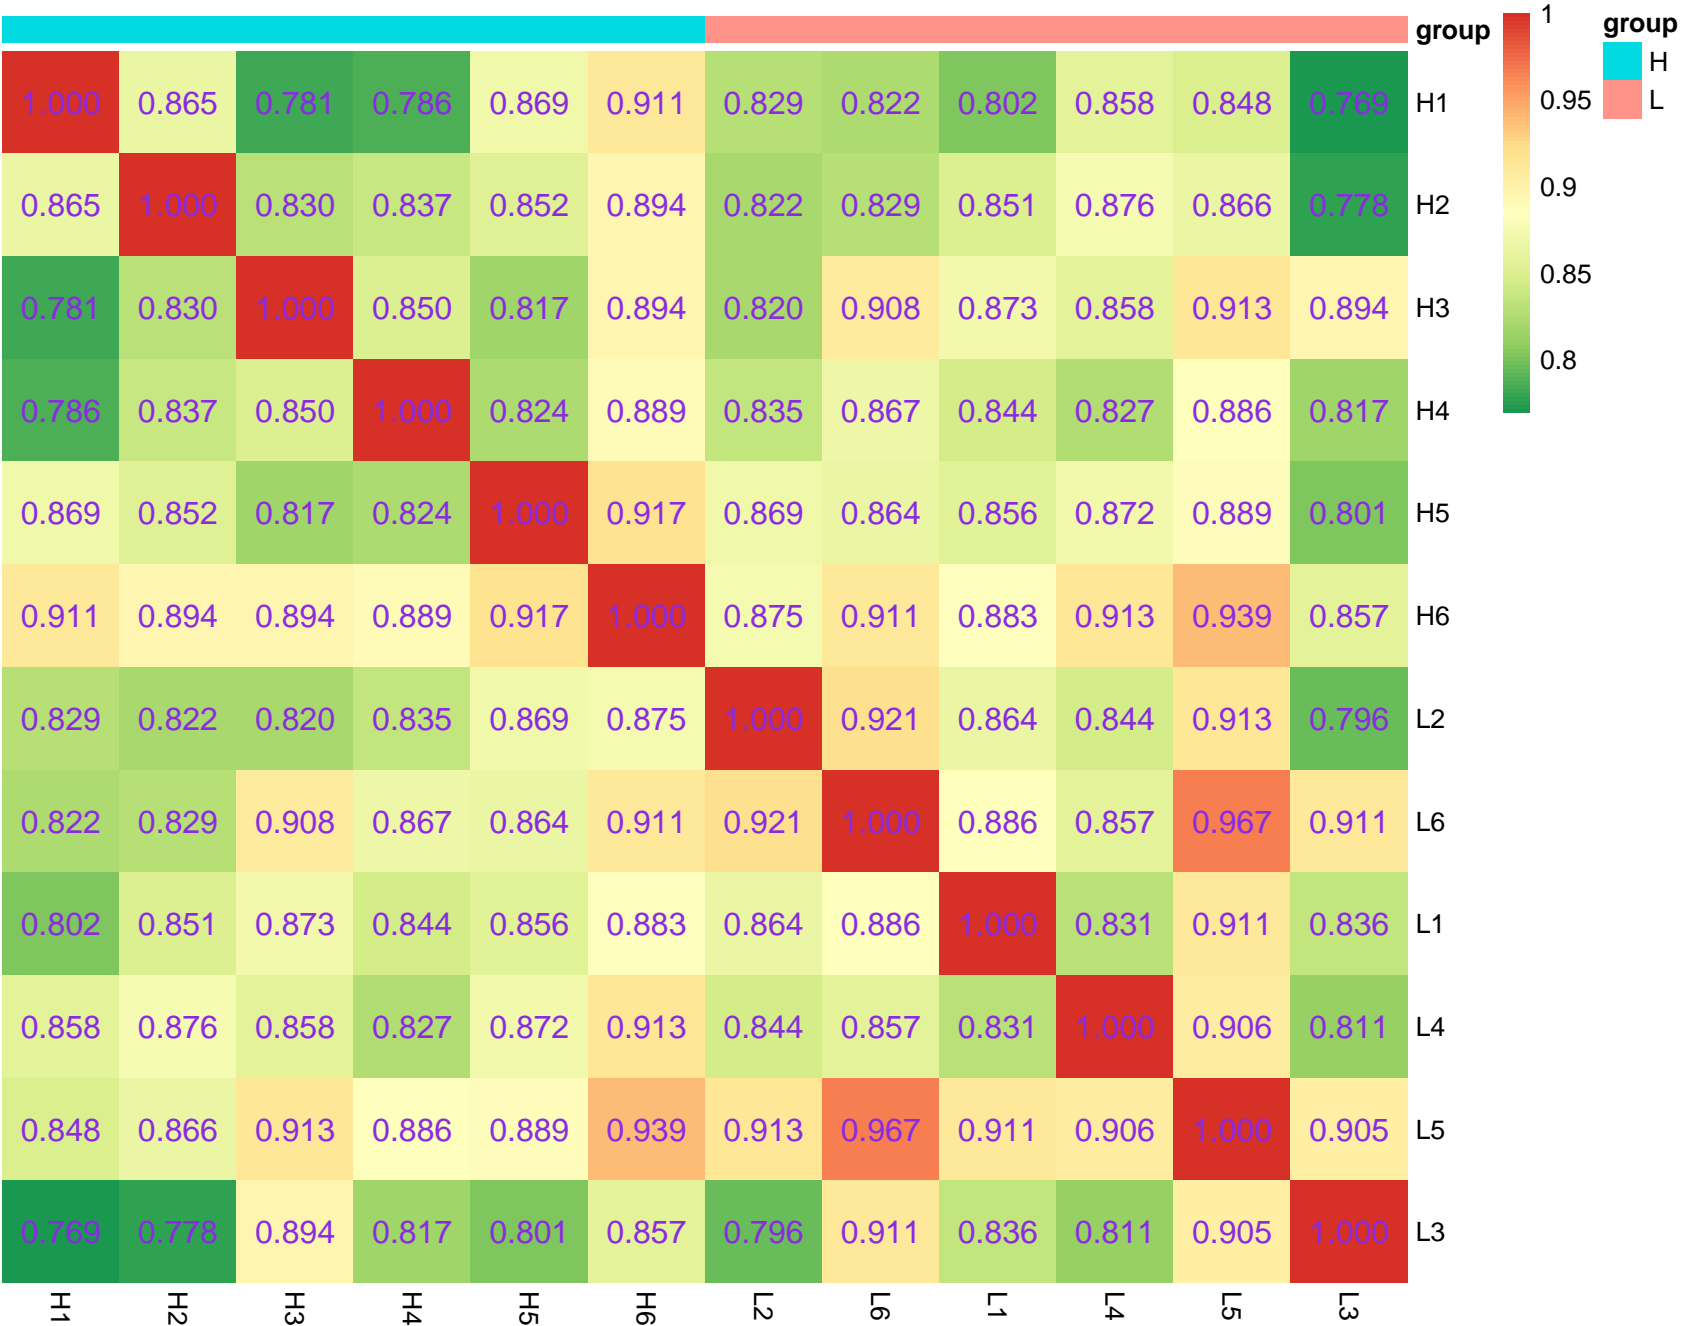

Supplement: biomarker_Web_Report_.zip [file All_cor.pdf › Web_Report/Quality_control/qc_data/All_cor.pdf]

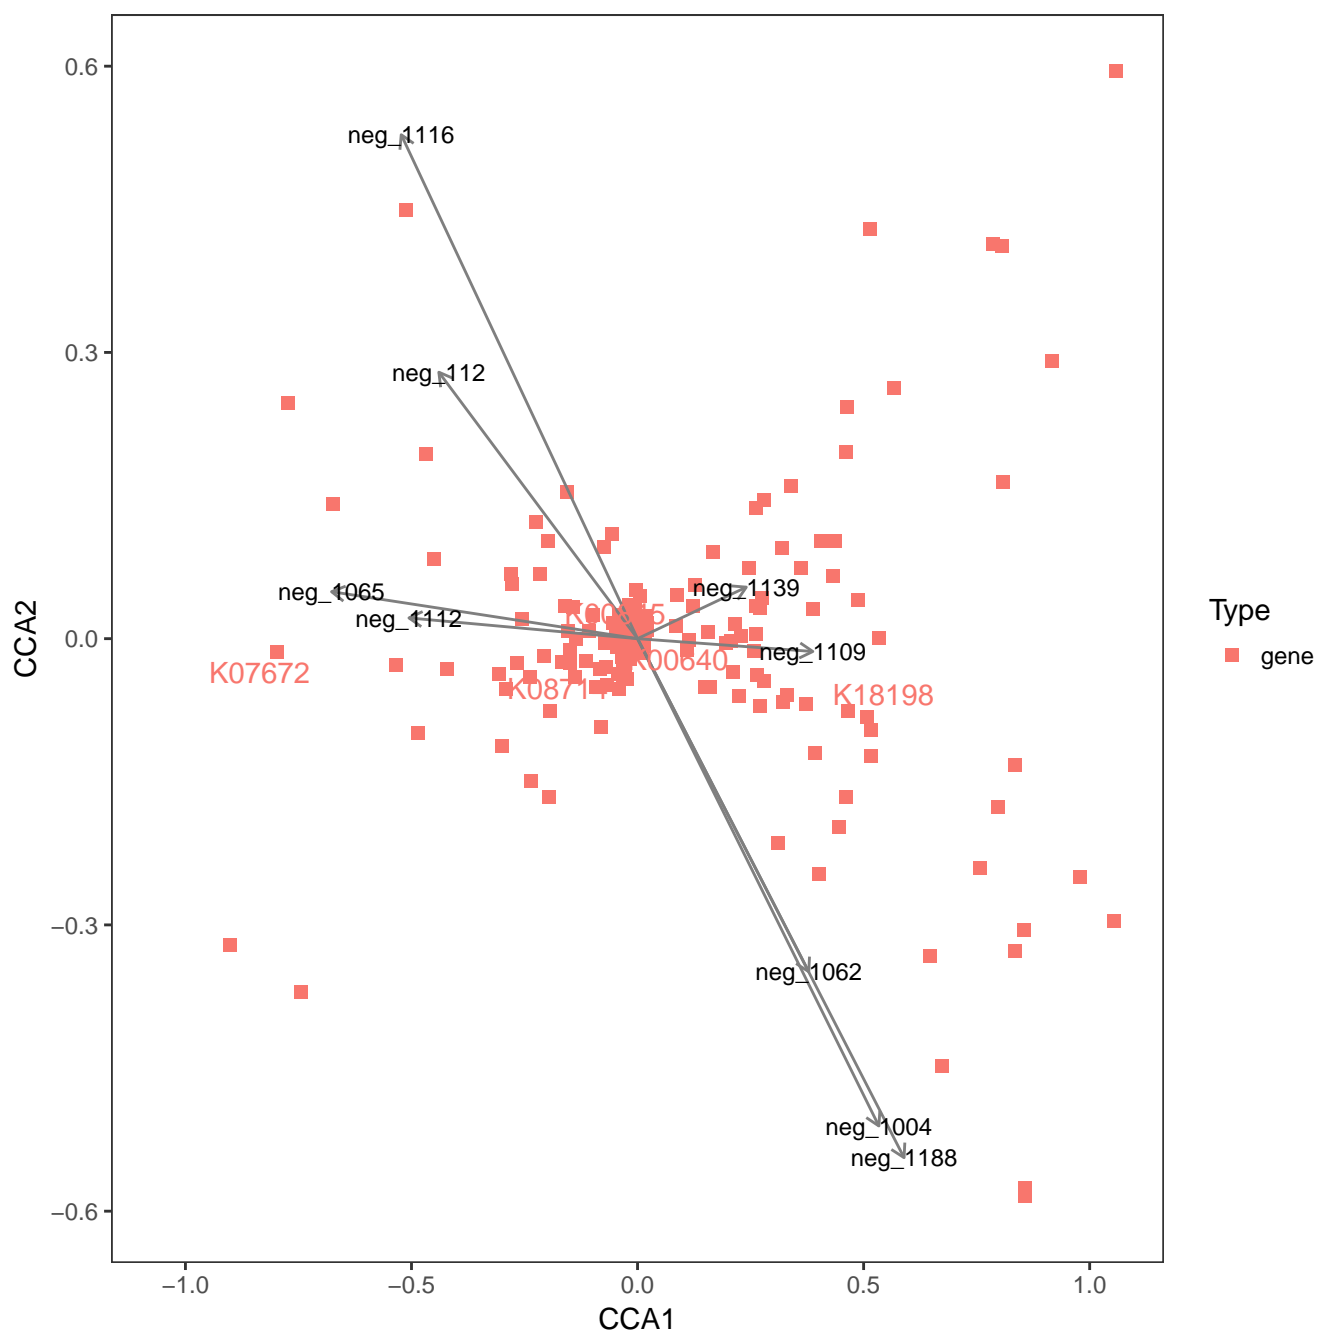

Supplement: neg_biomarker_Web_Report.zip [file CCA.pdf › Web_Report/CCA/function/treat1_H_L.vs.H_L/CCA.pdf]

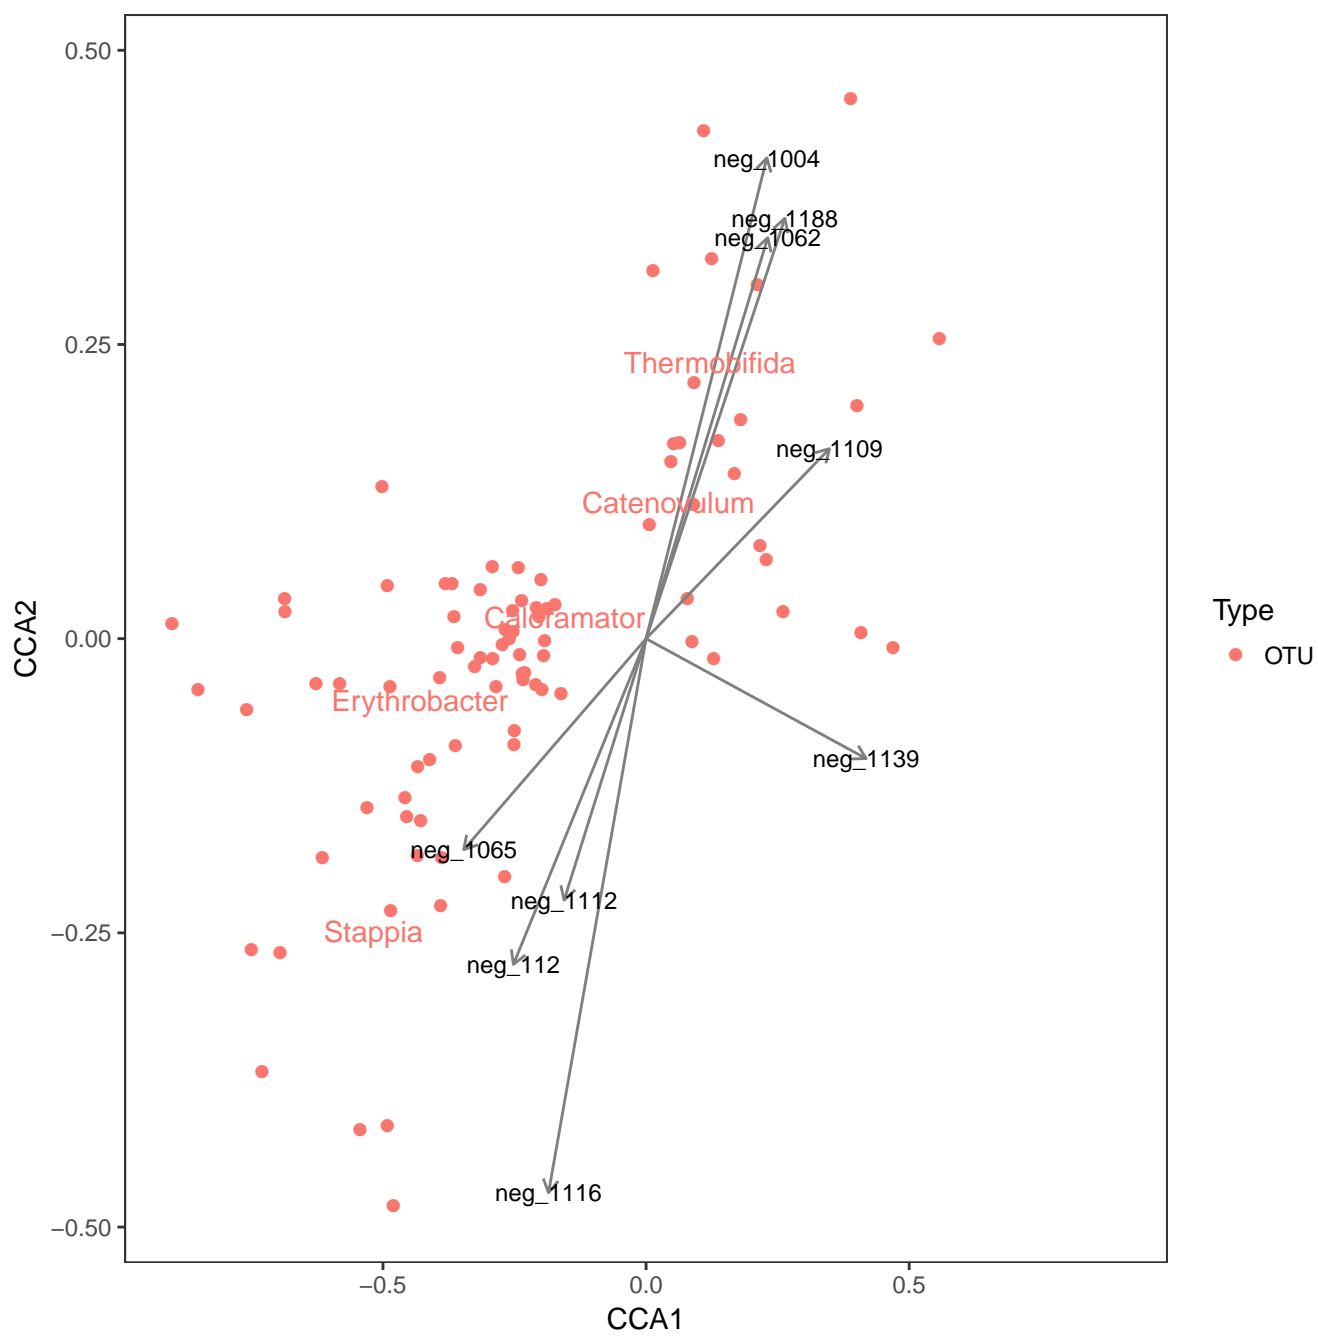

Supplement: neg_biomarker_Web_Report.zip [file CCA.pdf › Web_Report/CCA/taxonomy/treat1_H_L.vs.H_L/CCA.pdf]

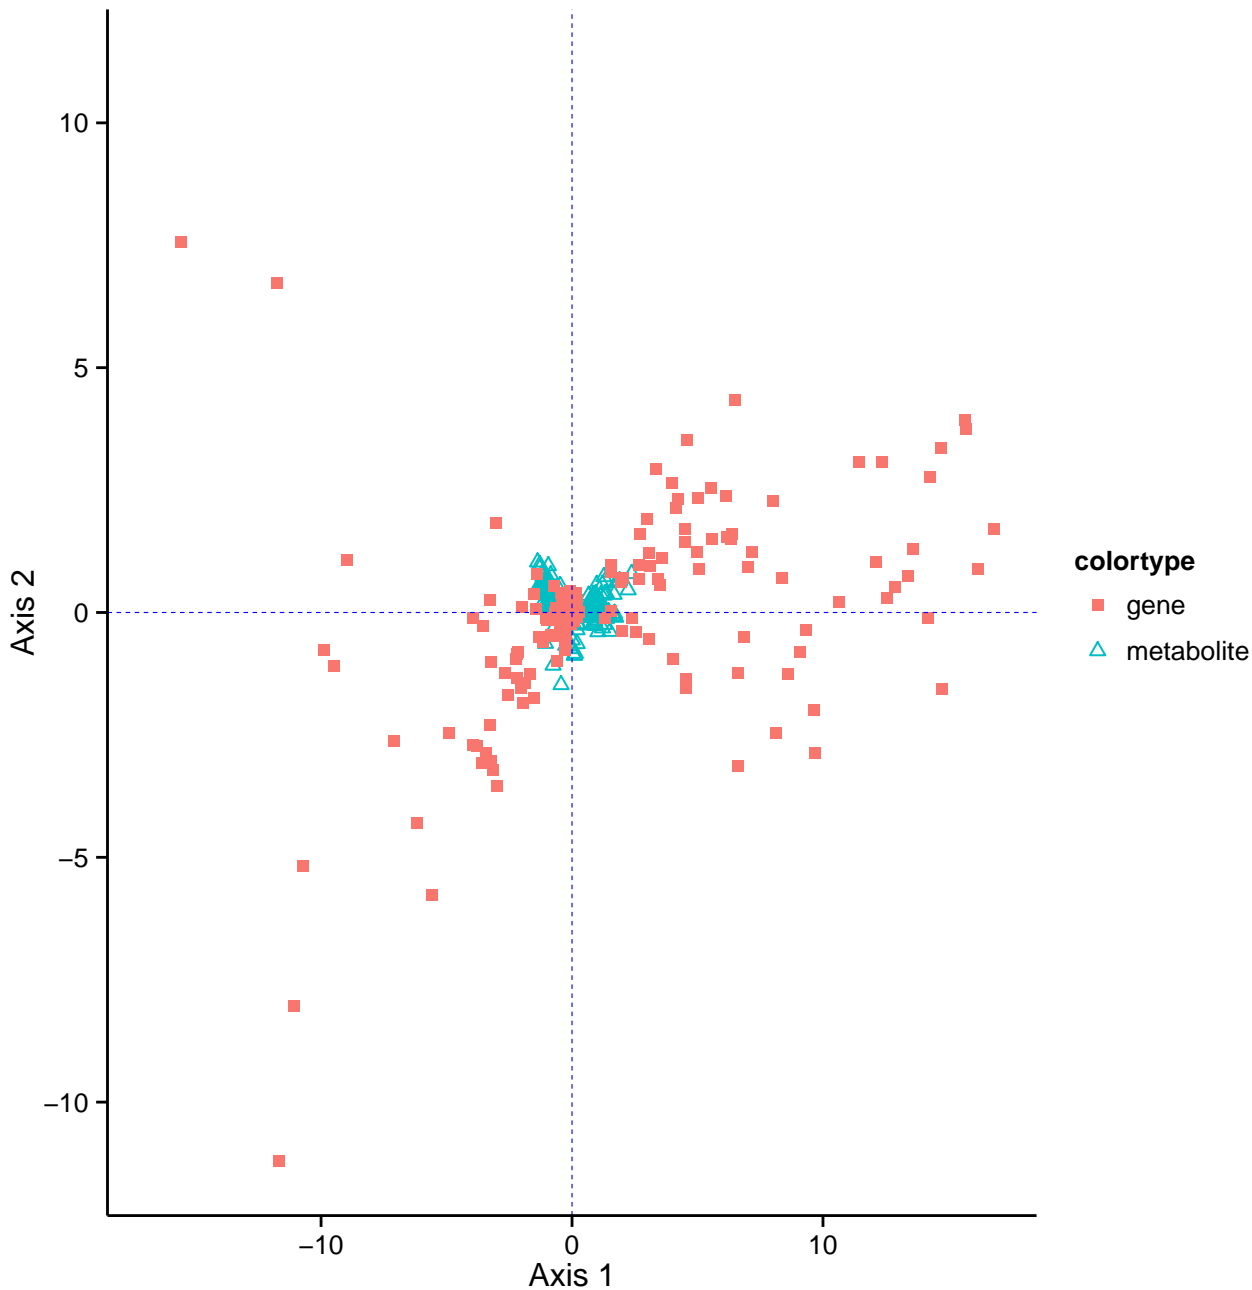

Supplement: neg_biomarker_Web_Report.zip [file treat1_H_L.vs.H_L_coinertia_analysis.pdf › Web_Report/coinertia_analysis/function/treat1_H_L.vs.H_L/treat1_H_L.vs.H_L_coinertia_analysis.pdf]

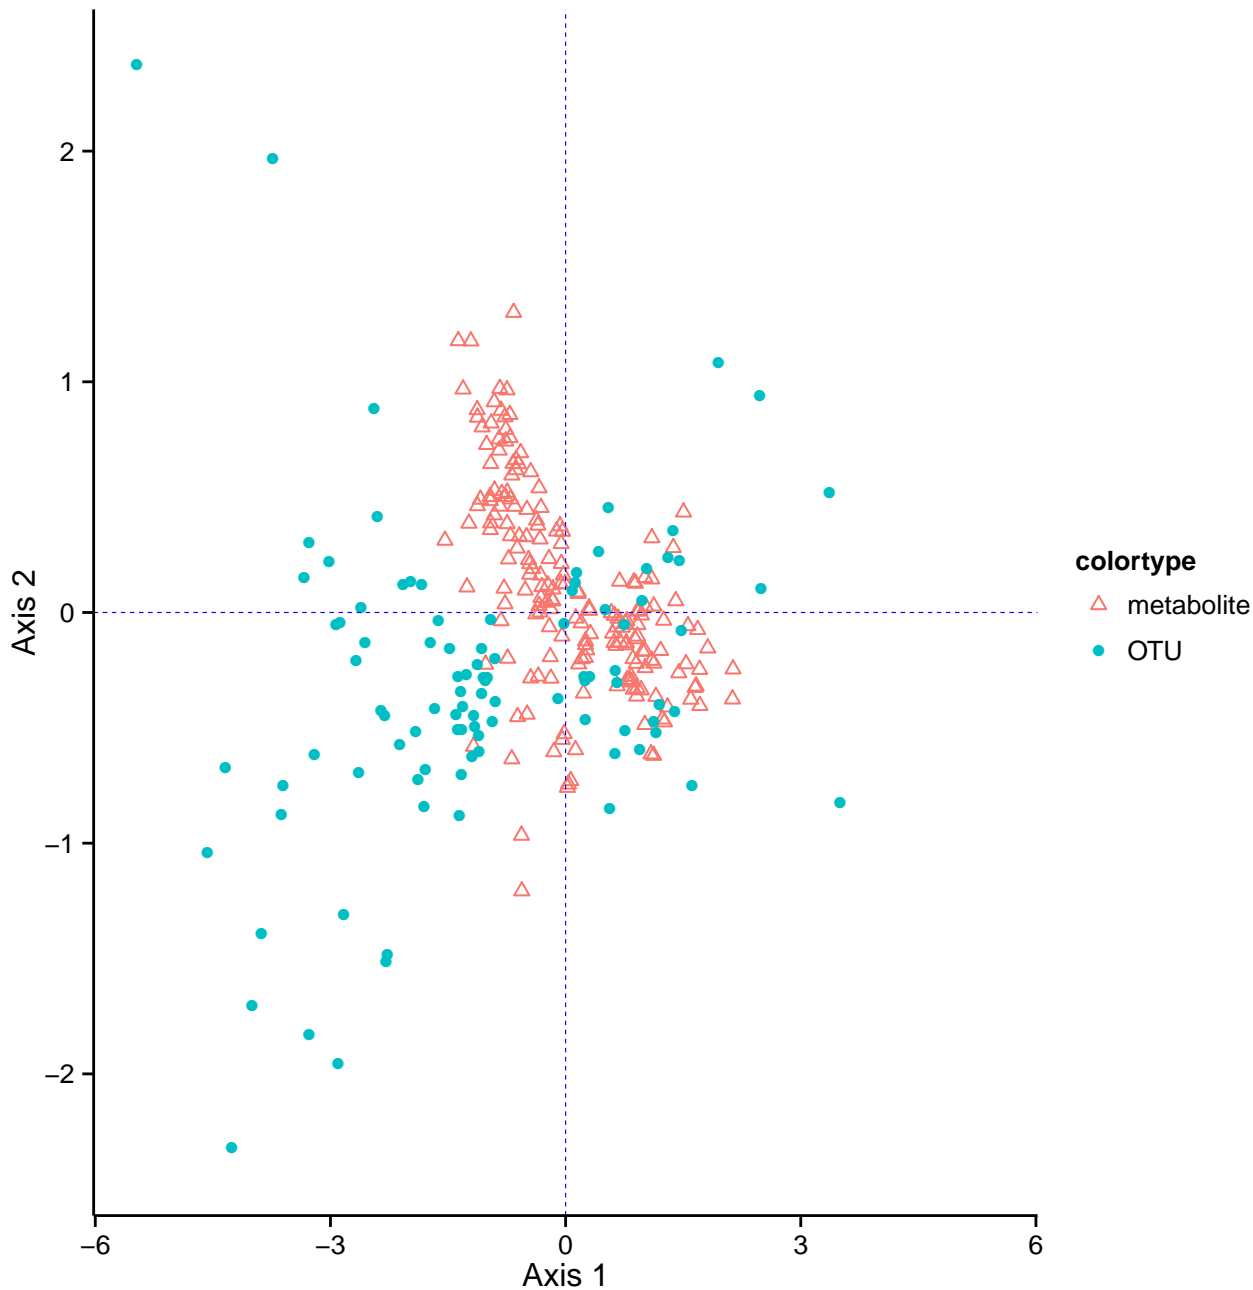

Supplement: neg_biomarker_Web_Report.zip [file treat1_H_L.vs.H_L_coinertia_analysis.pdf › Web_Report/coinertia_analysis/taxonomy/treat1_H_L.vs.H_L/treat1_H_L.vs.H_L_coinertia_analysis.pdf]

Genes

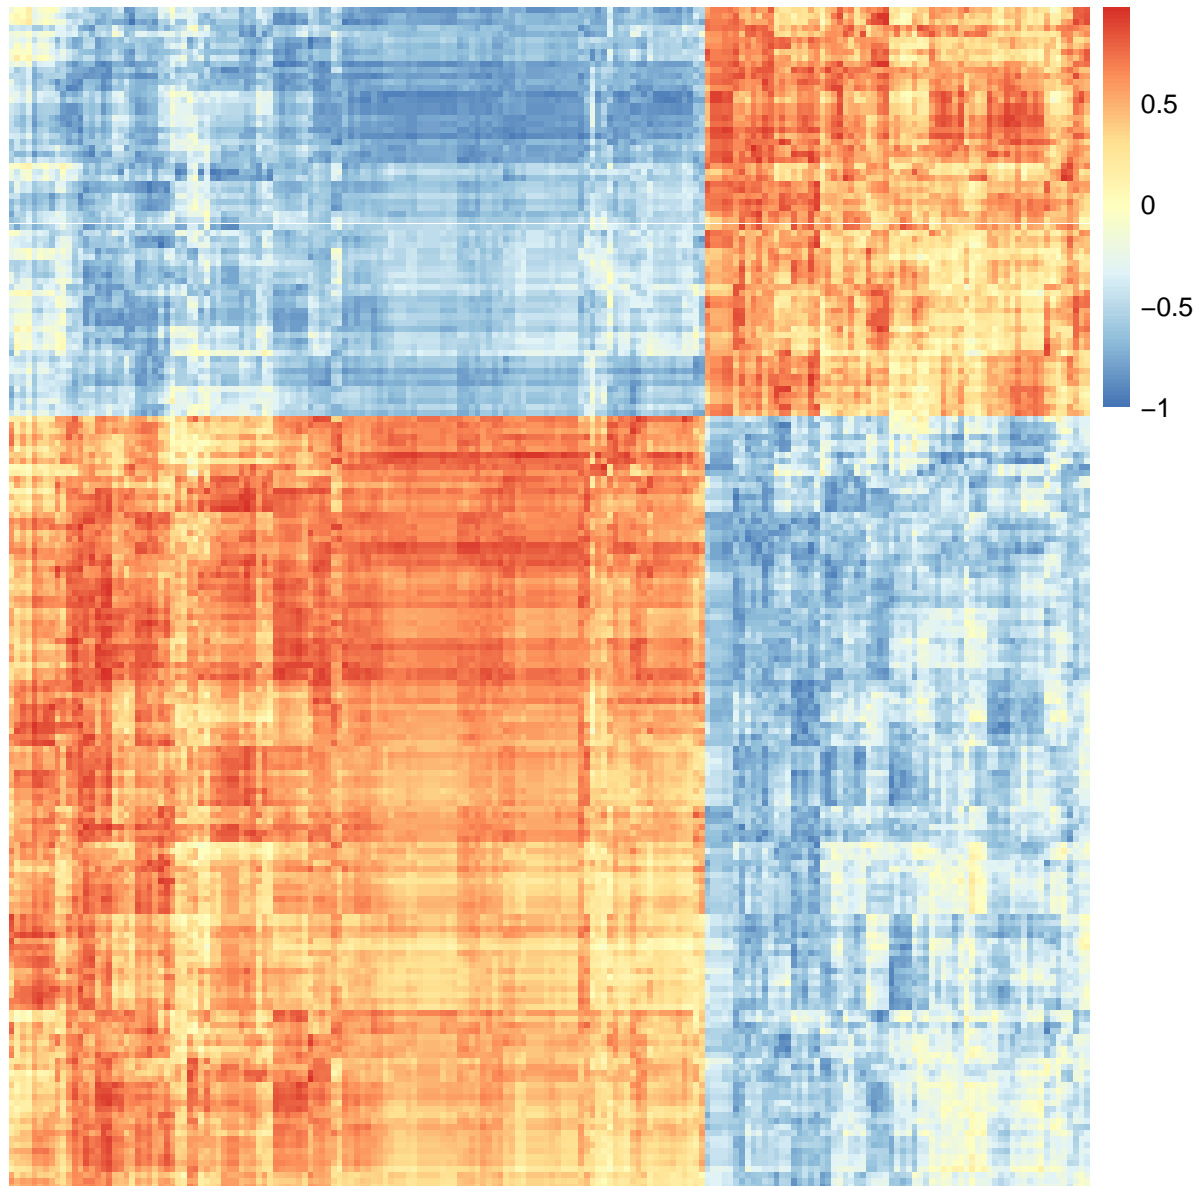

Metaboiltes

Supplement: neg_biomarker_Web_Report.zip [file treat1_H_L.vs.H_L_function_cor.pdf › Web_Report/correlation_analysis/function/treat1_H_L.vs.H_L/treat1_H_L.vs.H_L_function_cor.pdf]

genus

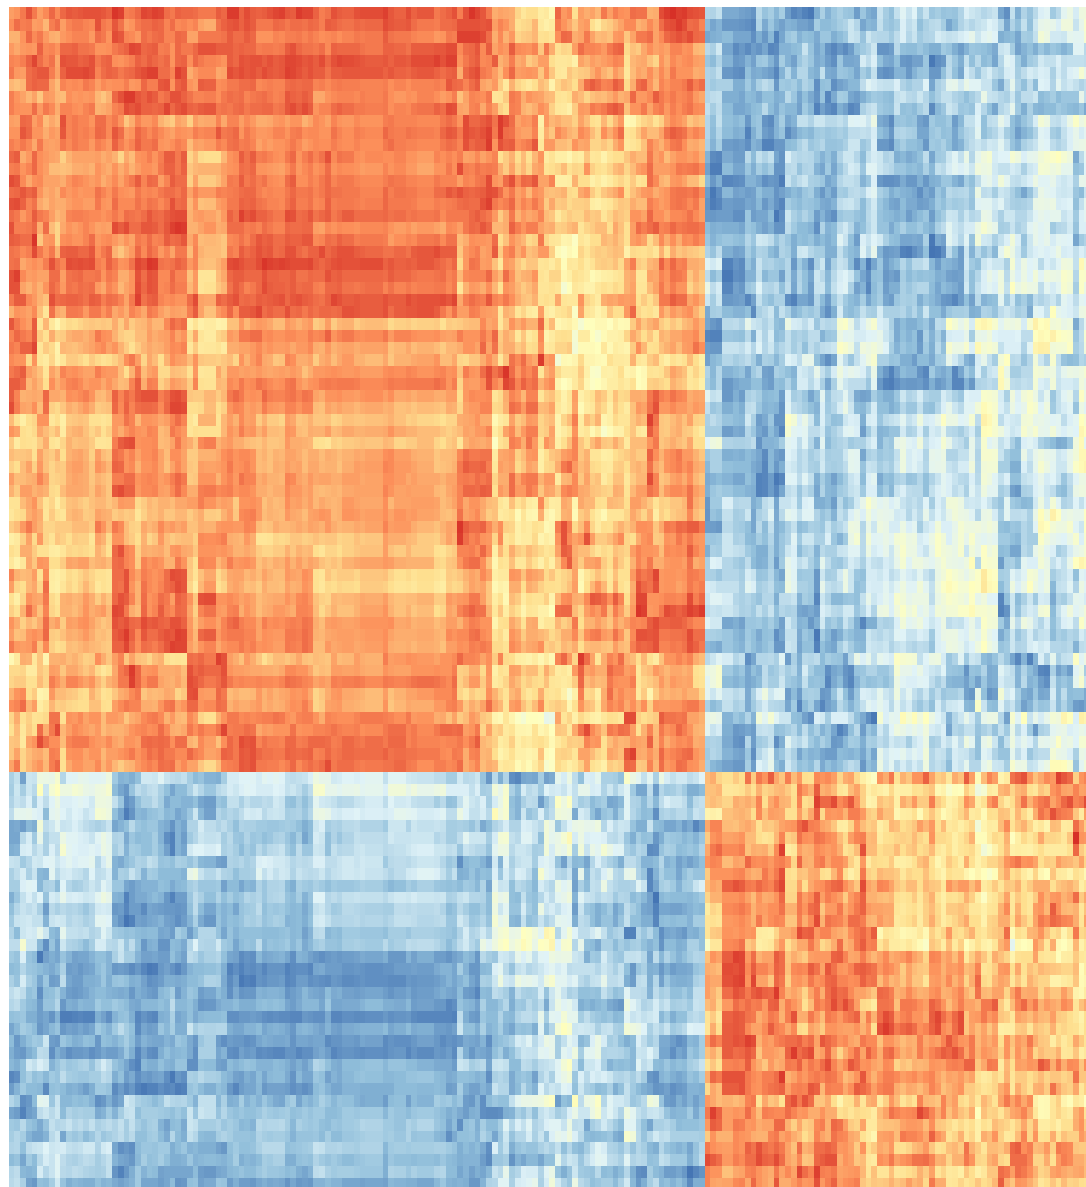

0.5

0

-0.5

Metaboiltes

Supplement: neg_biomarker_Web_Report.zip [file treat1_H_L.vs.H_L_taxonomy_cor.pdf › Web_Report/correlation_analysis/taxonomy/treat1_H_L.vs.H_L/treat1_H_L.vs.H_L_taxonomy_cor.pdf]

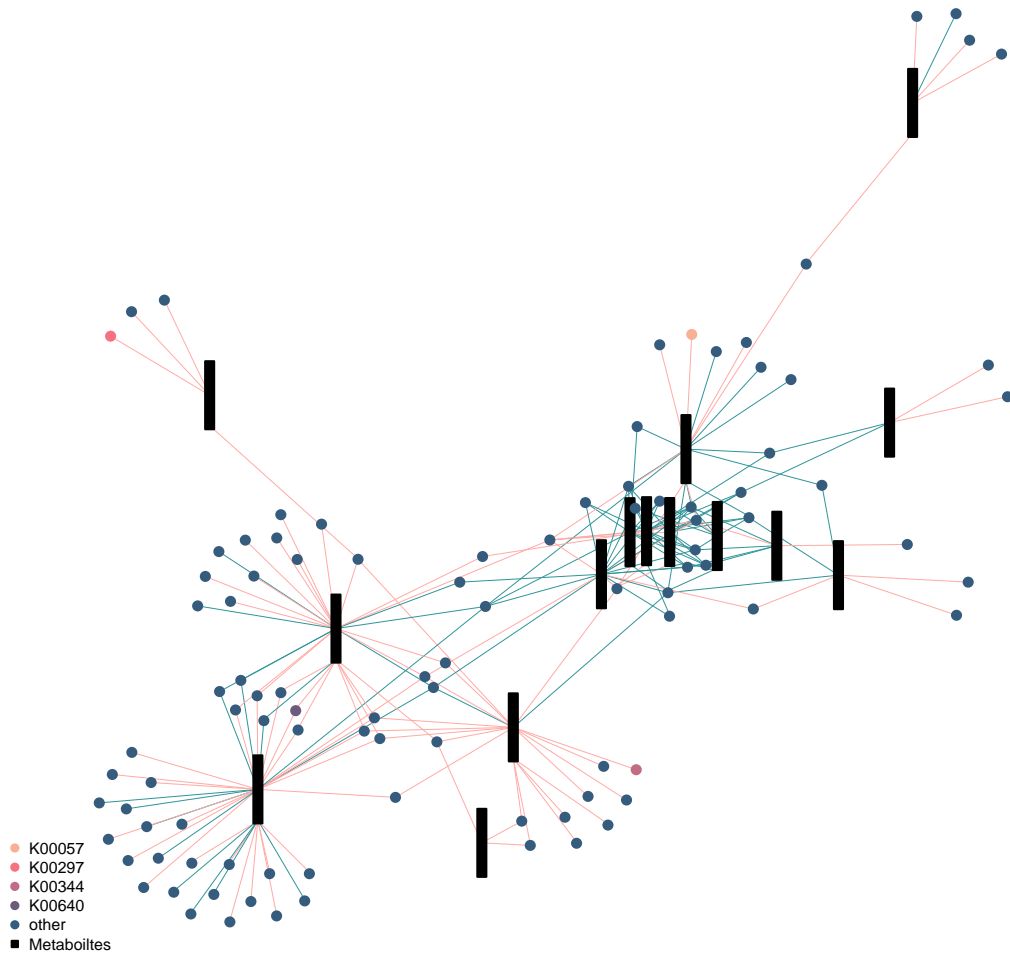

Supplement: neg_biomarker_Web_Report.zip [file treat1_H_L.vs.H_L_module_1_network.pdf › Web_Report/network_analysis/function/treat1_H_L.vs.H_L/treat1_H_L.vs.H_L_module_1_network.pdf]

● K00013  
● K00014  
● K00057  
● K00059  
● other  
■ Métabolites

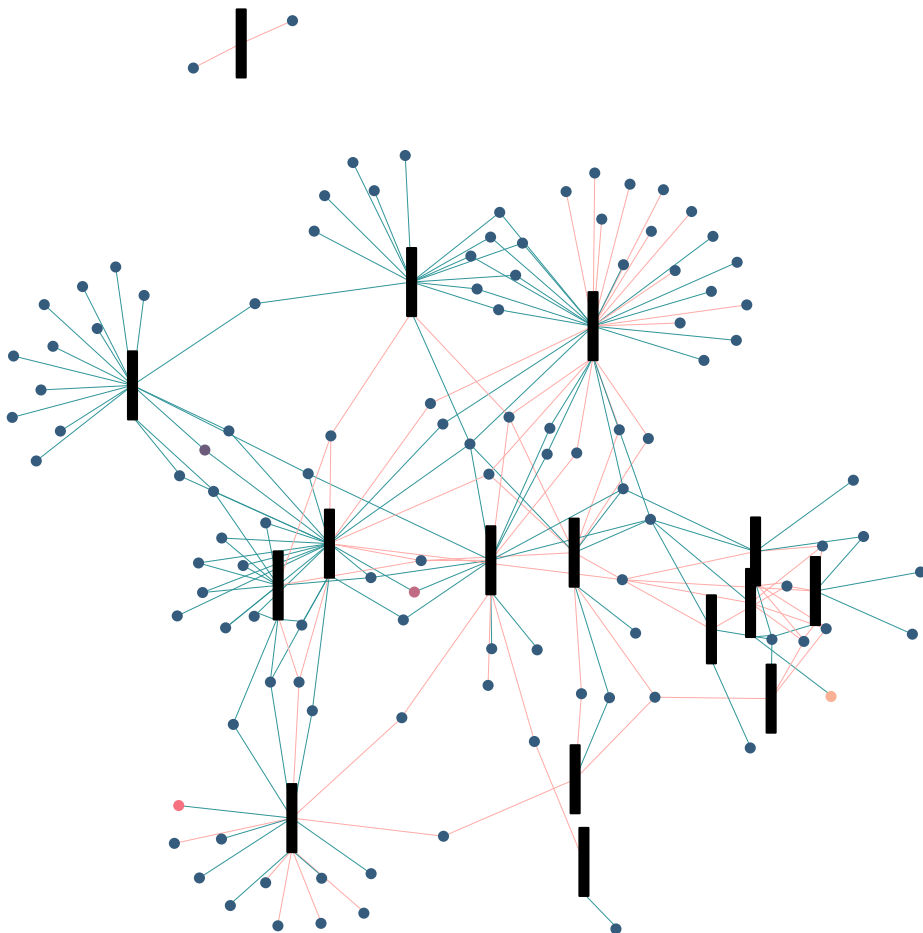

Supplement: neg_biomarker_Web_Report.zip [file treat1_H_L.vs.H_L_module_2_network.pdf › Web_Report/network_analysis/function/treat1_H_L.vs.H_L/treat1_H_L.vs.H_L_module_2_network.pdf]

- Acetivibrio
- Acidaminobacter
- Amantichitinum
- Anaerobacterium
- other
- Metabolites

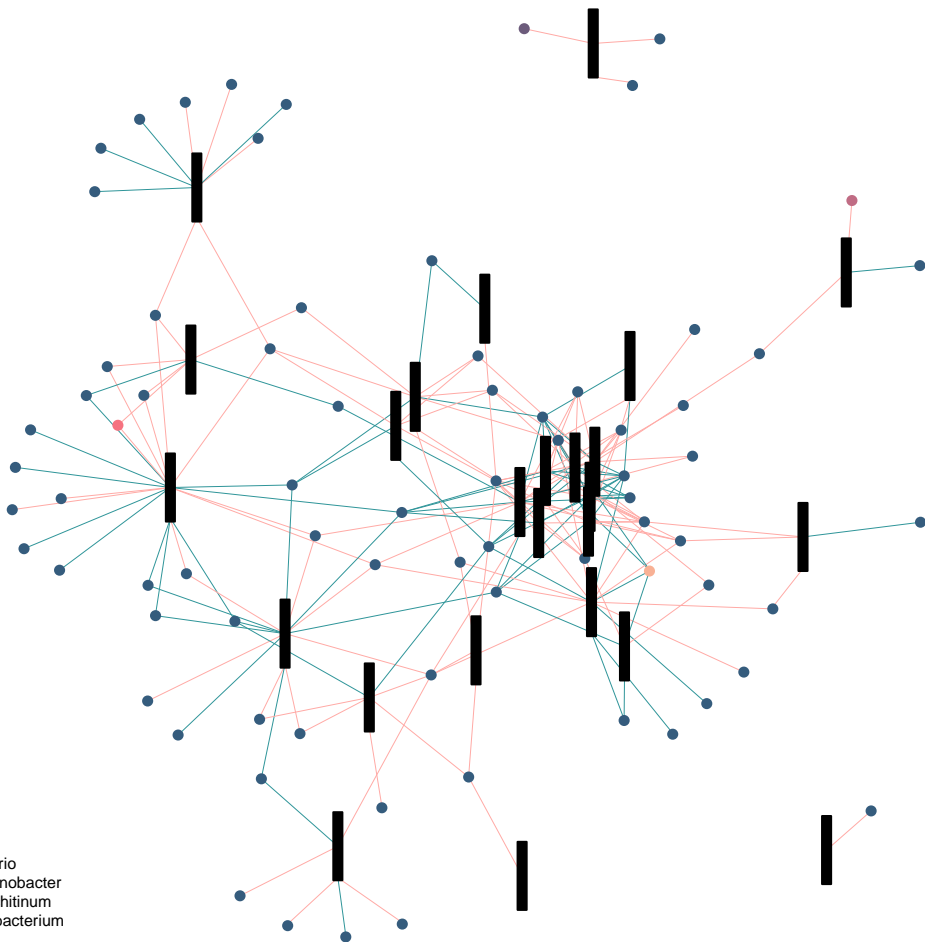

Supplement: neg_biomarker_Web_Report.zip [file treat1_H_L.vs.H_L_module_1_network.pdf › Web_Report/network_analysis/taxonomy/treat1_H_L.vs.H_L/treat1_H_L.vs.H_L_module_1_network.pdf]

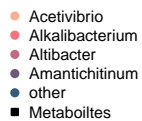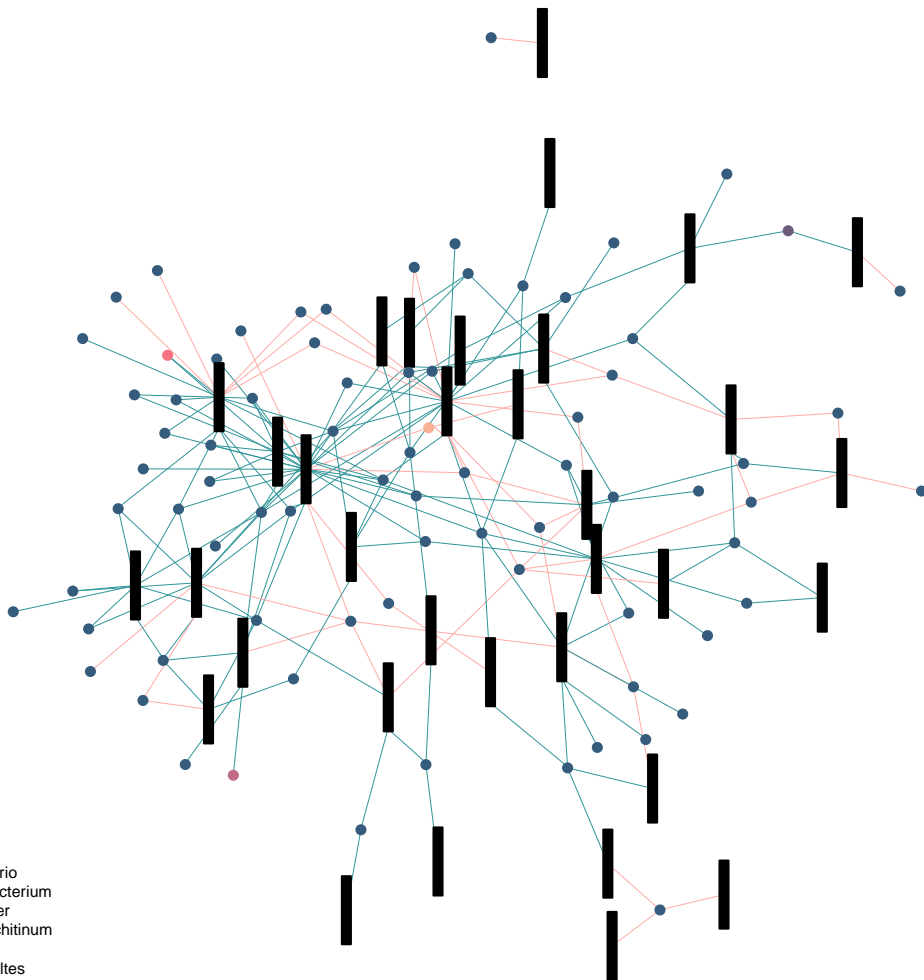

Supplement: neg_biomarker_Web_Report.zip [file treat1_H_L.vs.H_L_module_2_network.pdf › Web_Report/network_analysis/taxonomy/treat1_H_L.vs.H_L/treat1_H_L.vs.H_L_module_2_network.pdf]

Receiver operating characteristic

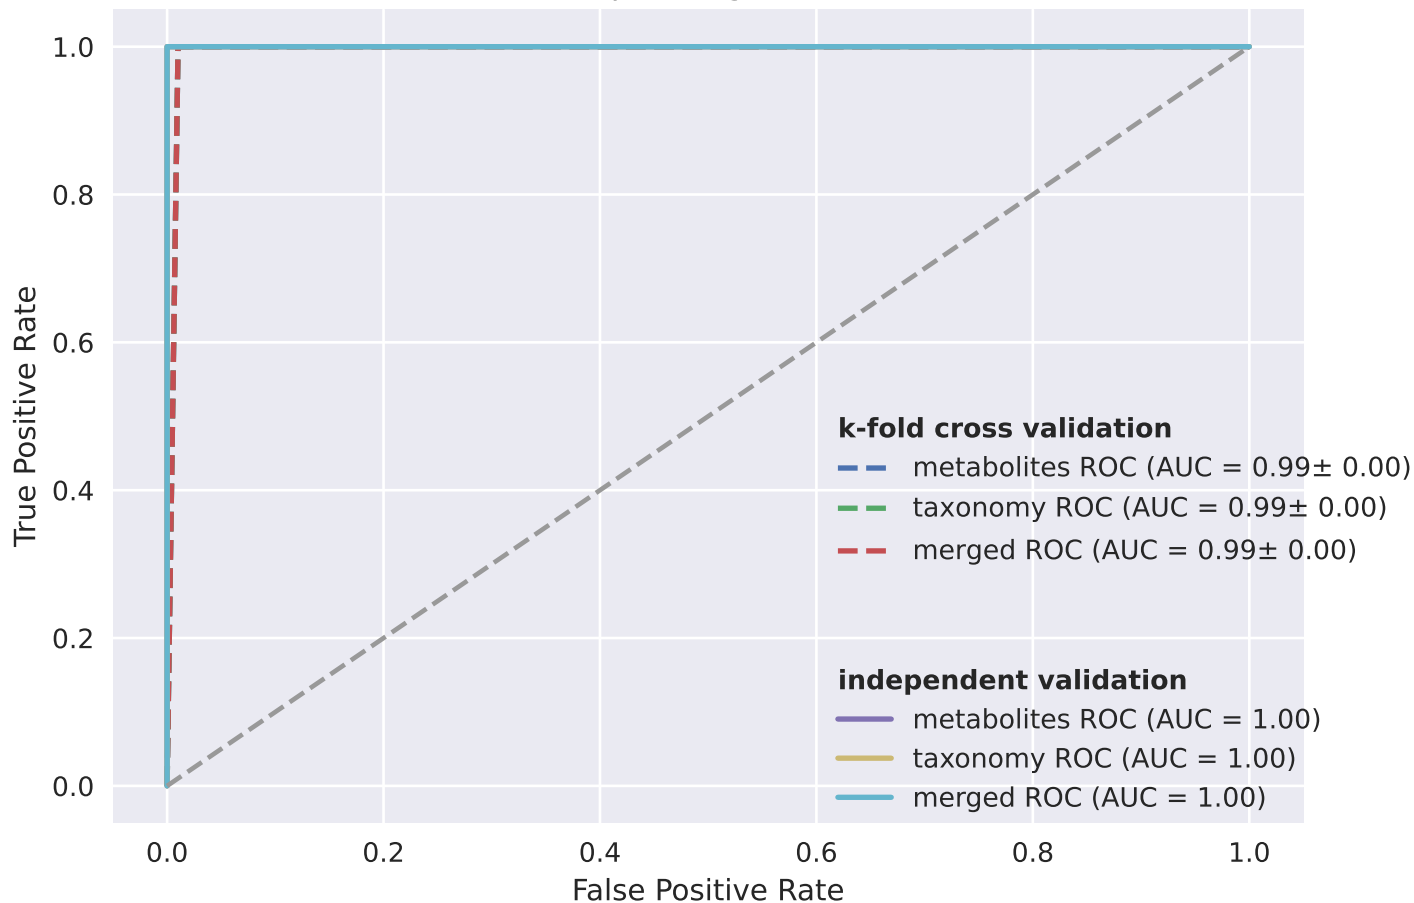

Supplement: neg_biomarker_Web_Report.zip [file treat1_H_L.vs.H_L_ROC.pdf › Web_Report/randomForest/function/treat1_H_L.vs.H_L/treat1_H_L.vs.H_L_ROC.pdf]

Feature Importance  
Train set Accuracy: 1.00  
Test set Accuracy: 1.00

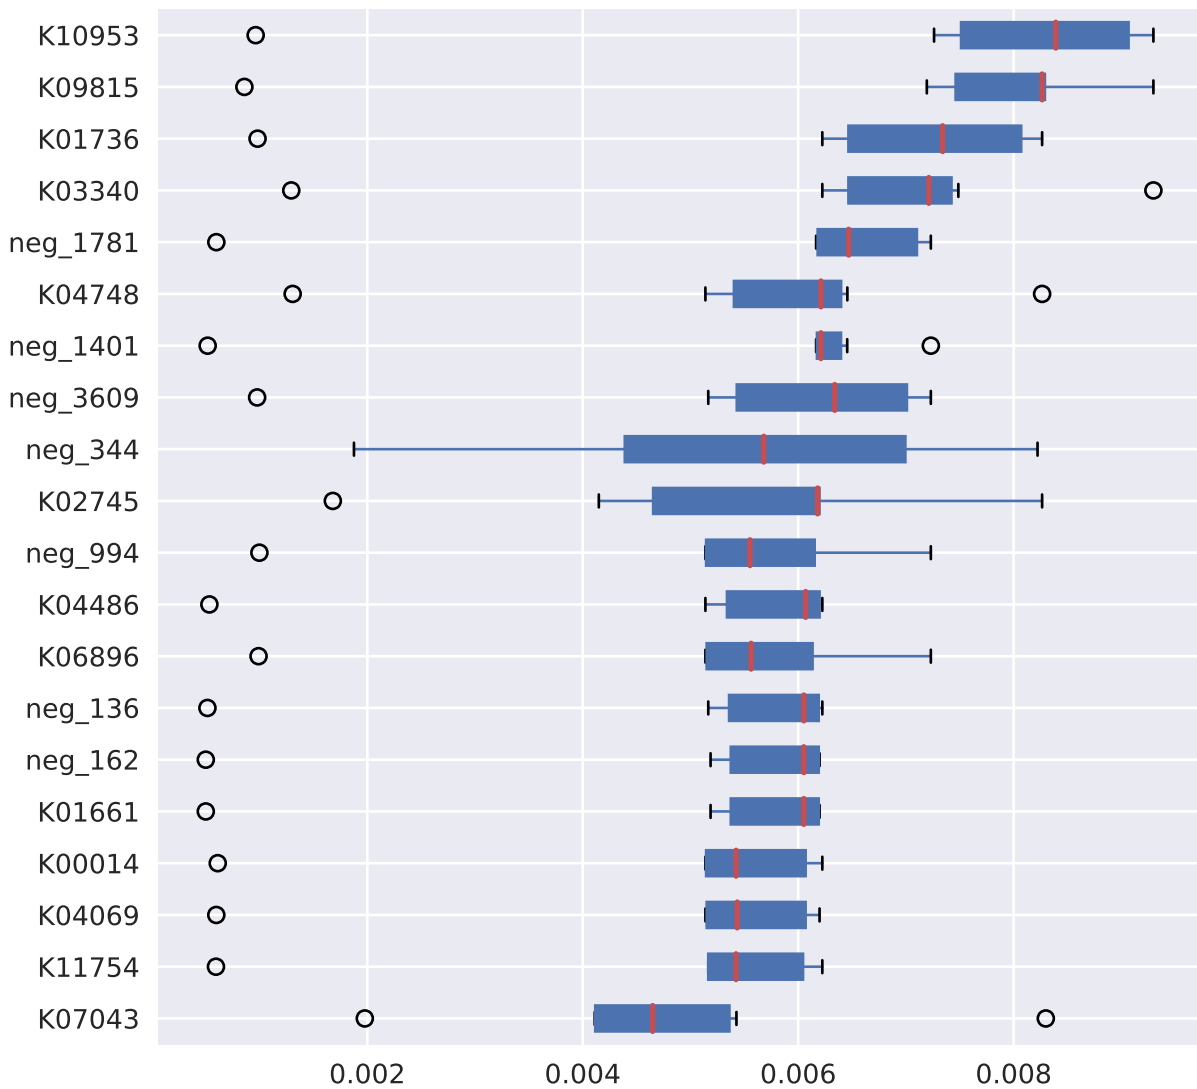

Supplement: neg_biomarker_Web_Report.zip [file treat1_H_L.vs.H_L_feature_importance.pdf › Web_Report/randomForest/function/treat1_H_L.vs.H_L/treat1_H_L.vs.H_L_feature_importance.pdf]

Receiver operating characteristic



Supplement: neg_biomarker_Web_Report.zip [file treat1_H_L.vs.H_L_ROC.pdf › Web_Report/randomForest/taxonomy/treat1_H_L.vs.H_L/treat1_H_L.vs.H_L_ROC.pdf]

Feature Importance  
Train set Accuracy: 1.00  
Test set Accuracy: 1.00

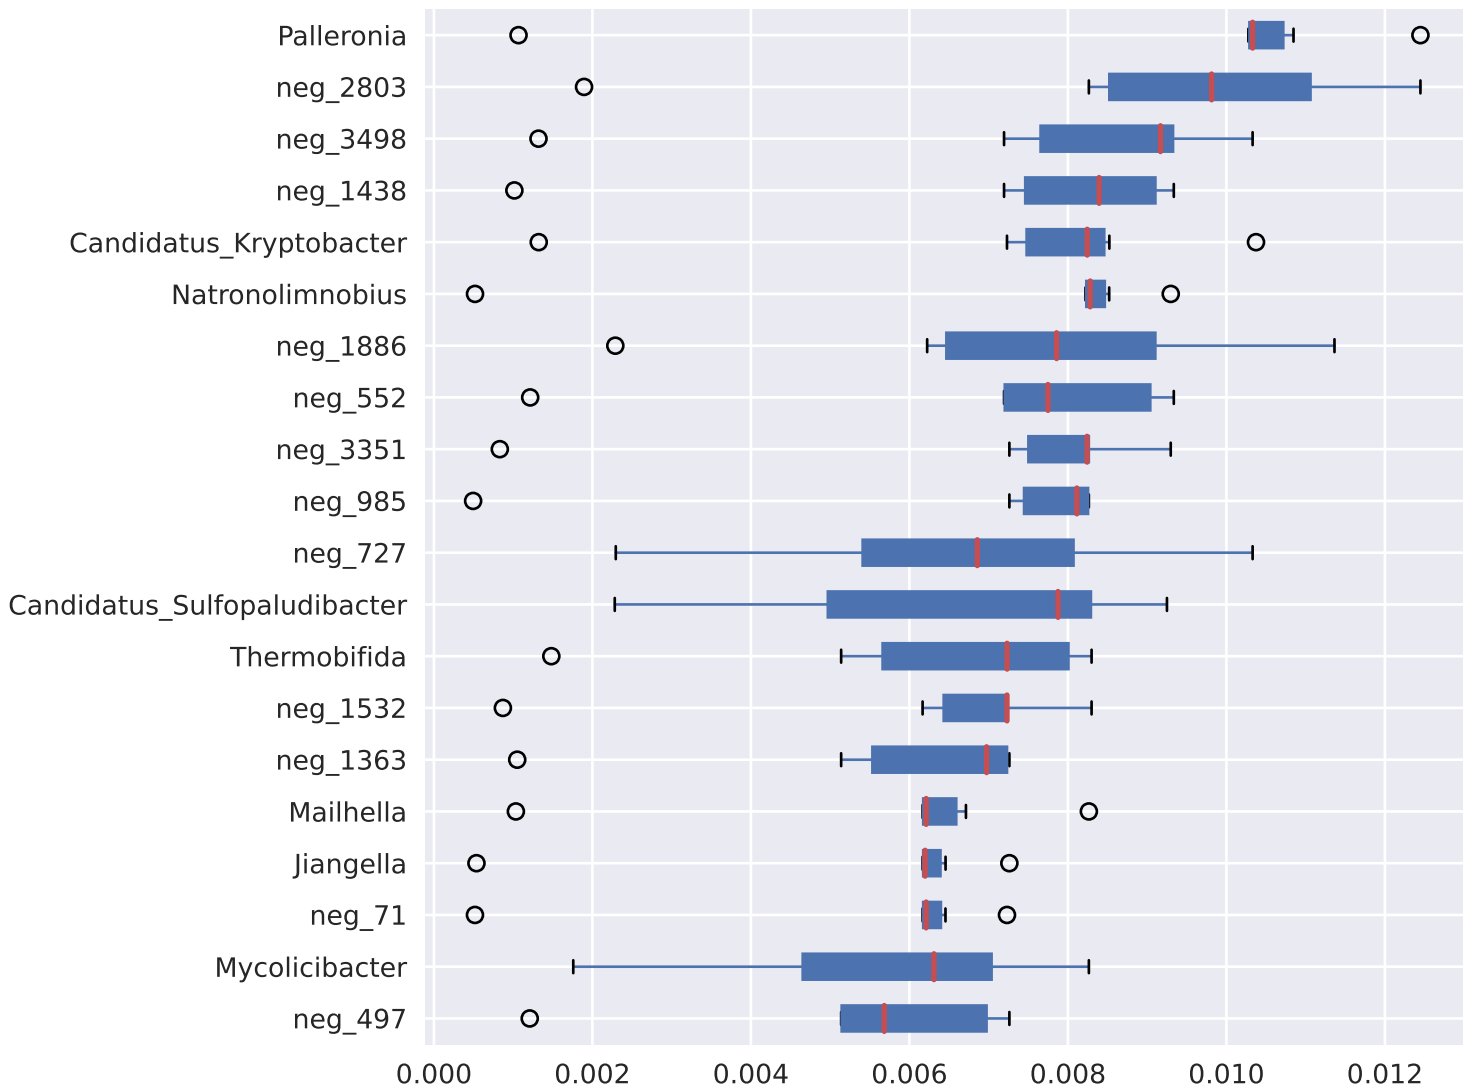

Supplement: neg_biomarker_Web_Report.zip [file treat1_H_L.vs.H_L_feature_importance.pdf › Web_Report/randomForest/taxonomy/treat1_H_L.vs.H_L/treat1_H_L.vs.H_L_feature_importance.pdf]
